# Supplementary material for: Deficient de-S-acylation in aging and CLN1 contributes to lyso-mitochondrial dysfunction, lipid dyshomeostasis, and resultant lipofuscin biogenesis
Source: Research Square preprint supplement (doi:10.21203/rs.3.rs-8770768/v1), 2026-02-09
Supplement: Supplementary file 1 [file 448c7693bf5bd7305de805ed.xlsx]

## Sheet: Data Description
Title: Deficient de-S-acylation in aging and CLN1 contributes to lyso-mitochondrial dysfunction, lipid dyshomeostasis, and resultant lipofuscin biogenesis
Authors: Sofia Massaro Tieze, Alexander Esqueda, Rachel McAllister, Matija Lagator, Betül Yücel, Eric Sun, TuKiet T. Lam, Nicholas Lockyer, Kallol Gupta, Sreeganga S. Chandra
Data Description: This file contains the protein IDs from proteomic analyses of purified lipofuscin from PPT1 KO and WT murine brain. Lipofuscin was purified from PPT1 KO (Ppt1-/-) mouse brain at 2, 4, and 7 months of age, and from WT mouse brain at 12, 18, and 24 months of age. Each biological replicate contained lipofuscin purified from total brain of one male and one female mouse. Identified l…

## Sheet: PPT1 KO - 2M
PPT1 KO 2 Month Lipofuscin Proteome (n = 1002)
UniProt Accession	SWISSPROT Accession	UniProt ID	Gene Name
Q9CQV8	1433B	1433B	Ywhab
P62259	1433E	1433E	Ywhae
P68510	1433F	1433F	Ywhah
P61982	1433G	1433G	Ywhag
P68254	1433T	1433T	Ywhaq
P63101	1433Z	1433Z	Ywhaz
Q76MZ3	2AAA	2AAA	Ppp2r1a
Q99L13	3HIDH	3HIDH	Hibadh
P10852	4F2	4F2	Slc3a2
A0A0A6YW67	A0A0A6YW67	A0A0A6YW67	Gm8797
A2ALL9	A2ALL9	A2ALL9	Atp2b3
Q3UHJ0	AAK1	AAK1	Aak1
P05201	AATC	AATC	Got1
P05202	AATM	AATM	Got2
Q61102	ABCB7	ABCB7	Abcb7
Q6PE15	ABHDA	ABHDA	Abhd10
E9Q030	E9Q030	ABLM1	Ablim1
E9Q0W6	E9Q0W6	ABLM2	Ablim2
A0A0R4J0P1	A0A0R4J0P1	ACAD8	Acad8
Q8JZN5	ACAD9	ACAD9	Acad9
A0A0R4J083	A0A0R4J083	ACADL	Acadl
P45952	ACADM	ACADM	Acadm
Q07417	ACADS	ACADS	Acads
P50544	ACADV	ACADV	Acadvl
Q99PU5	ACBG1	ACBG1	Acsbg1
Q9DBL1	ACDSB	ACDSB	Acadsb
Q91V92	ACLY	ACLY	Acly
Q9CQR4	ACO13	ACO13	Acot13
Q99KI0	ACON	ACON	Aco2
Q9QYR9	ACOT2	ACOT2	Acot2
Q9R0X4	ACOT9	ACOT9	Acot9
F6ZFT1	F6ZFT1	ACPM	Ndufab1
Q8VCW8	ACSF2	ACSF2	Acsf2
Q5ICG5	Q5ICG5	ACSL6	Acsl6
P63260	ACTG	ACTG	Actg1
A1BN54	A1BN54	ACTN1	Actn1
A0A494BB86	A0A494BB86	ACTZ	Actr1a
D3YUP9	D3YUP9	ADA22	Adam22
F8WGR0	F8WGR0	ADDA	Add1
Q9QYB8	ADDB	ADDB	Add2
Q9QYB5	ADDG	ADDG	Add3
P48962	ADT1	ADT1	Slc25a4
P51881	ADT2	ADT2	Slc25a5
Q8JZQ2	AFG32	AFG32	Afg3l2
Q9ESW4	AGK	AGK	Agk
B1AU25	B1AU25	AIFM1	Aifm1
P46660	AINX	AINX	Ina
Q9JII6	AK1A1	AK1A1	Akr1a1
Q9CZS1	AL1B1	AL1B1	Aldh1b1
Q8R0Y6	AL1L1	AL1L1	Aldh1l1
B1ATI0	B1ATI0	AL3A2	Aldh3a2
Q8CHT0	AL4A1	AL4A1	Aldh4a1
Q9DBF1	AL7A1	AL7A1	Aldh7a1
Q9JLJ2	AL9A1	AL9A1	Aldh9a1
A0A0G2JEU1	A0A0G2JEU1	ALDH2	Aldh2
P05064	ALDOA	ALDOA	Aldoa
P05063	ALDOC	ALDOC	Aldoc
P45376	ALDR	ALDR	Akr1b1
A0A0G2JEG8	A0A0G2JEG8	AMPH	Amph
Q9CPY7	AMPL	AMPL	Lap3
S4R2F3	S4R2F3	ANK2	Ank2
S4R2K9	S4R2K9	ANK3	Ank3
P48036	ANXA5	ANXA5	Anxa5
F8WIT2	F8WIT2	ANXA6	Anxa6
Q64133	AOFA	AOFA	Maoa
Q8BW75	AOFB	AOFB	Maob
Q61548	AP180	AP180	Snap91
O35643	AP1B1	AP1B1	Ap1b1
P17426	AP2A1	AP2A1	Ap2a1
P17427	AP2A2	AP2A2	Ap2a2
Q9DBG3	AP2B1	AP2B1	Ap2b1
Q3TWV4	Q3TWV4	AP2M1	Ap2m1
A0A571BES1	A0A571BES1	AP3B2	Ap3b2
O54774	AP3D1	AP3D1	Ap3d1
Q9R0Q6	ARC1A	ARC1A	Arpc1a
P61205	ARF3	ARF3	Arf3
P61750	ARF4	ARF4	Arf4
P61161	ARP2	ARP2	Actr2
Q99JY9	ARP3	ARP3	Actr3
Q9D898	ARP5L	ARP5L	Arpc5l
D3YXG6	D3YXG6	ARPC2	Arpc2
H7BWZ3	H7BWZ3	ARPC3	Arpc3
P59999	ARPC4	ARPC4	Arpc4
Q3UA72	Q3UA72	ARPC5	Arpc5
Q9WV54	ASAH1	ASAH1	Asah1
Q8C0M9	ASGL1	ASGL1	Asrgl1
Q8VDN2	AT1A1	AT1A1	Atp1a1
Q6PIE5	AT1A2	AT1A2	Atp1a2
A0A0G2JGX4	A0A0G2JGX4	AT1A3	Atp1a3
P14094	AT1B1	AT1B1	Atp1b1
P14231	AT1B2	AT1B2	Atp1b2
O55143	AT2A2	AT2A2	Atp2a2
G5E829	AT2B1	AT2B1	Atp2b1
S4R1C4	S4R1C4	AT2B2	Atp2b2
E9Q828	E9Q828	AT2B4	Atp2b4
Q9CQQ7	AT5F1	AT5F1	Atp5pb
A0A0M3HEP7	A0A0M3HEP7	AT8A1	Atp8a1
Q925I1	ATAD3	ATAD3	Atad3
E9PV44	E9PV44	ATIF1	Atpif1
Q8BH66	ATLA1	ATLA1	Atl1
P56382	ATP5E	ATP5E	Atp5f1e
Q9DCX2	ATP5H	ATP5H	Atp5pd
Q06185	ATP5I	ATP5I	Atp5me
P97450	ATP5J	ATP5J	Atp5pf
P03930	ATP8	ATP8	Mtatp8
Q03265	ATPA	ATPA	Atp5f1a
P56480	ATPB	ATPB	Atp5f1b
Q9D3D9	ATPD	ATPD	Atp5f1d
Q8C2Q8	Q8C2Q8	ATPG	Atp5c1
P56135	ATPK	ATPK	Atp5mf
Q78IK2	ATPMK	ATPMK	Atp5mk
Q9DB20	ATPO	ATPO	Atp5po
A0A0R4J023	A0A0R4J023	AUHM	Auh
Q80TZ3	AUXI	AUXI	Dnajc6
B2RXT3	B2RXT3	B2RXT3	Ogdhl
E9PYH2	E9PYH2	BACH	Acot7
B1AZ46	B1AZ46	BAIP2	Baiap2
P18572	BASI	BASI	Bsg
Q91XV3	BASP1	BASP1	Basp1
F7BNZ5	F7BNZ5	BCAS1	Bcas1
Q9CZP5	BCS1	BCS1	Bcs1l
Q80XN0	BDH	BDH	Bdh1
O08539	BIN1	BIN1	Bin1
P20029	BIP	BIP	Hspa5
Q8R164	BPHL	BPHL	Bphl
A0A1B0GRV0	A0A1B0GRV0	BPNT1	Bpnt1
O88737	BSN	BSN	Bsn
P14106	C1QB	C1QB	C1qb
Q8R5L1	Q8R5L1	C1QBP	C1qbp
A0A1W2P733	A0A1W2P733	C1TC	Mthfd1
Q3V3R1	C1TM	C1TM	Mthfd1l
E9Q1X8	E9Q1X8	CA2D1	Cacna2d1
Q9WTR5	CAD13	CAD13	Cdh13
D3YYT0	D3YYT0	CADH2	Cdh2
A0A668KLV1	A0A668KLV1	CADM1	Cadm1
Q8BLQ9	CADM2	CADM2	Cadm2
K4DI58	K4DI58	CADM3	Cadm3
Q8R464	CADM4	CADM4	Cadm4
P00920	CAH2	CAH2	Ca2
Q08331	CALB2	CALB2	Calb2
P0DP26	CALM1	CALM1	Calm1
P14211	CALR	CALR	Calr
P35564	CALX	CALX	Canx
A0A0A6YW88	A0A0A6YW88	CAMKV	Camkv
O08529	CAN2	CAN2	Capn2
Q63810	CANB1	CANB1	Ppp3r1
Q6ZQ38	CAND1	CAND1	Cand1
P40124	CAP1	CAP1	Cap1
Q80TJ1	CAPS1	CAPS1	Cadps
P47757	CAPZB	CAPZB	Capzb
P10605	CATB	CATB	Ctsb
F8WIR1	F8WIR1	CATD	Ctsd
P47754	CAZA2	CAZA2	Capza2
Q00493	CBPE	CBPE	Cpe
P48758	CBR1	CBR1	Cbr1
Q91VT4	CBR4	CBR4	Cbr4
S4R2F1	S4R2F1	CCG8	Cacng8
A0A2R8VI30	A0A2R8VI30	CD47	Cd47
A2AMQ5	A2AMQ5	CDS2	Cds2
Q9JKC6	CEND	CEND	Cend1
Q64433	CH10	CH10	Hspe1
P63038	CH60	CH60	Hspd1
Q91WS0	CISD1	CISD1	Cisd1
Q9CZU6	CISY	CISY	Cs
Q6IRU5	CLCB	CLCB	Cltb
Q5SXR6	Q5SXR6	CLH1	Cltc
Q9QYB1	CLIC4	CLIC4	Clic4
Q06890	CLUS	CLUS	Clu
Q3U5Q7	CMPK2	CMPK2	Cmpk2
P16330	CN37	CN37	Cnp
P12960	CNTN1	CNTN1	Cntn1
O54991	CNTP1	CNTP1	Cntnap1
E9QNF7	E9QNF7	CNTP2	Cntnap2
P18760	COF1	COF1	Cfl1
P45591	COF2	COF2	Cfl2
Q8BMS4	COQ3	COQ3	Coq3
P00405	COX2	COX2	Mtco2
P00416	COX3	COX3	mt-Co3
P19783	COX41	COX41	Cox4i1
P12787	COX5A	COX5A	Cox5a
Q9D881	Q9D881	COX5B	Cox5b-ps
Q9CPQ1	COX6C	COX6C	Cox6c
P84086	CPLX2	CPLX2	Cplx2
Q3UYN2	Q3UYN2	CPNE6	Cpne6
P52825	CPT2	CPT2	Cpt2
Q60737	CSK21	CSK21	Csnk2a1
Q6P9K8	CSKI1	CSKI1	Caskin1
A0A067XG53	A0A067XG53	CSKP	Cask
Q71M36	CSPG5	CSPG5	Cspg5
P97315	CSRP1	CSRP1	Csrp1
A0A0J9YU62	A0A0J9YU62	CTBP1	Ctbp1
Q61301	CTNA2	CTNA2	Ctnna2
Q02248	CTNB1	CTNB1	Ctnnb1
B7ZNF6	B7ZNF6	CTND2	Ctnnd2
P56391	CX6B1	CX6B1	Cox6b1
P48771	CX7A2	CX7A2	Cox7a2
P23242	CXA1	CXA1	Gja1
Q9D0M3	CY1	CY1	Cyc1
P62897	CYC	CYC	Cycs
A0A2I3BPH9	A0A2I3BPH9	CYRIB	Cyrib
Q5M8N4	D39U1	D39U1	Sdr39u1
P48318	DCE1	DCE1	Gad1
A0A0G2JGQ6	A0A0G2JGQ6	DCLK1	Dclk1
Q99KJ8	DCTN2	DCTN2	Dctn2
Q9CWS0	DDAH1	DDAH1	Ddah1
Q9CQ62	DECR	DECR	Decr1
Q9R0P5	DEST	DEST	Dstn
G3UX44	G3UX44	DHB8	H2-Ke6
P26443	DHE3	DHE3	Glud1
A0A0G2JGJ1	A0A0G2JGJ1	DHPR	Qdpr
Q99L04	DHRS1	DHRS1	Dhrs1
Q5U458	DJC11	DJC11	Dnajc11
O08749	DLDH	DLDH	Dld
D3Z3B8	D3Z3B8	DLG1	Dlg1
A0A338P6J0	A0A338P6J0	DLG2	Dlg2
A0A338P6E5	A0A338P6E5	DLG4	Dlg4
D3Z709	D3Z709	DLGP1	Dlgap1
Q0VF59	Q0VF59	DLGP2	Dlgap2
B0V2P5	B0V2P5	DMXL2	Dmxl2
Q9QYJ0	DNJA2	DNJA2	Dnaja2
Q99M87	DNJA3	DNJA3	Dnaja3
A2AUE1	A2AUE1	DNJC5	Dnajc5
Q8K1M6	DNM1L	DNM1L	Dnm1l
Q6NXK7	DPP10	DPP10	Dpp10
Q5U4C2	Q5U4C2	DPP6	Dpp6
Q6P1J1	Q6P1J1	DPYL1	Crmp1
O08553	DPYL2	DPYL2	Dpysl2
A0A0R4J1N0	A0A0R4J1N0	DPYL4	Dpysl4
Q9EQF6	DPYL5	DPYL5	Dpysl5
Q9JHU4	DYHC1	DYHC1	Dync1h1
P63168	DYL1	DYL1	Dynll1
A0A0J9YUN4	A0A0J9YUN4	DYN1	Dnm1
E9QLL2	E9QLL2	DYN3	Dnm3
A2AUK5	A2AUK5	E41L1	Epb41l1
O70318	E41L2	E41L2	Epb41l2
A0A5F8MPE1	A0A5F8MPE1	E41L3	Epb41l3
P56564	EAA1	EAA1	Slc1a3
P43006	EAA2	EAA2	Slc1a2
Q8BMS1	ECHA	ECHA	Hadha
Q99JY0	ECHB	ECHB	Hadhb
Q8BH95	ECHM	ECHM	Echs1
P42125	ECI1	ECI1	Eci1
P10126	EF1A1	EF1A1	Eef1a1
P62631	EF1A2	EF1A2	Eef1a2
P58252	EF2	EF2	Eef2
Q8K0D5	EFGM	EFGM	Gfm1
Q8C845	Q8C845	EFHD2	Efhd2
Q8BFR5	EFTU	EFTU	Tufm
Q8C522	ENDD1	ENDD1	Endod1
P17182	ENOA	ENOA	Eno1
P17183	ENOG	ENOG	Eno2
P08113	ENPL	ENPL	Hsp90b1
A0A1D5RLS1	A0A1D5RLS1	EP15R	Eps15l1
Q3UHT7	Q3UHT7	ERC2	Erc2
Q8BFZ9	ERLN2	ERLN2	Erlin2
Q99LC5	ETFA	ETFA	Etfa
Q9DCW4	ETFB	ETFB	Etfb
Q6PF96	Q6PF96	ETFD	Etfdh
Q9DCM0	ETHE1	ETHE1	Ethe1
Q8C163	EXOG	EXOG	Exog
Q9CR98	F136A	F136A	Fam136a
Q05816	FABP5	FABP5	Fabp5
P11404	FABPH	FABPH	Fabp3
A0A0R4J094	A0A0R4J094	FAHD2	Fahd2a
F8VPU2	FARP1	FARP1	Farp1
A0A0U1RNJ1	A0A0U1RNJ1	FAS	Fasn
G3X9U9	G3X9U9	FIS1	Fis1
O08917	FLOT1	FLOT1	Flot1
Q5SS83	Q5SS83	FLOT2	Flot2
Q61553	FSCN1	FSCN1	Fscn1
P97807	FUMH	FUMH	Fh
A0A0A0MQF6	A0A0A0MQF6	G3P	Gapdh
G5E8G3	G5E8G3	G5E8G3	Opcml
P06745	G6PI	G6PI	Gpi
Q9WV18	GABR1	GABR1	Gabbr1
Q80T41	GABR2	GABR2	Gabbr2
P61922	GABT	GABT	Abat
Q9D172	GAL3A	GAL3A	Gatd3
P62874	GBB1	GBB1	Gnb1
P62880	GBB2	GBB2	Gnb2
P29387	GBB4	GBB4	Gnb4
A0A0N4SVT3	A0A0N4SVT3	GBG12	Gng12
P63213	GBG2	GBG2	Gng2
P62812	GBRA1	GBRA1	Gabra1
P50571	GBRB1	GBRB1	Gabrb1
A0A0A0MQ68	A0A0A0MQ68	GCDH	Gcdh
Q3USC7	Q3USC7	GD1L1	Gdap1l1
O88741	GDAP1	GDAP1	Gdap1
P50396	GDIA	GDIA	Gdi1
Q61598	GDIB	GDIB	Gdi2
Q99PT1	GDIR1	GDIR1	Arhgdia
E9Q912	GDS1	GDS1	Rap1gds1
A0JNY3	A0JNY3	GEPH	Gphn
P03995	GFAP	GFAP	Gfap
Q9D6M3	GHC1	GHC1	Slc25a22
Q9DB41	GHC2	GHC2	Slc25a18
P15105	GLNA	GLNA	Glul
E9Q197	E9Q197	GLOD4	Glod4
B1ASZ3	B1ASZ3	GLPK	Gk
Q80Y14	GLRX5	GLRX5	Glrx5
D3Z7P3	GLSK	GLSK	Gls
B2RSH2	GNAI1	GNAI1	Gnai1
P08752	GNAI2	GNAI2	Gnai2
P18872	GNAO	GNAO	Gnao1
P21279	GNAQ	GNAQ	Gnaq
P63094	GNAS2	GNAS2	Gnas
O70443	GNAZ	GNAZ	Gnaz
P62881	GNB5	GNB5	Gnb5
E0CXN5	E0CXN5	GPDA	Gpd1
Q64521	GPDM	GPDM	Gpd2
P35802	GPM6A	GPM6A	Gpm6a
A2AEG6	A2AEG6	GPM6B	Gpm6b
Q7TNB5	Q7TNB5	GRIA1	Gria1
P23819	GRIA2	GRIA2	Gria2
Q3UNH4	GRIN1	GRIN1	Gprin1
P38647	GRP75	GRP75	Hspa9
Q99LP6	GRPE1	GRPE1	Grpel1
A2AE89	A2AE89	GSTM1	Gstm1
A0A494B908	A0A494B908	GSTP1	Gstp1
P32037	GTR3	GTR3	Slc2a3
Q9R111	GUAD	GUAD	Gda
Q6ZWY9	H2B1C	H2B1C	H2bc8
P62806	H4	H4	H4c16
Q91VB8	Q91VB8	HBA	Hba-a1
A8DUK4	A8DUK4	HBB1	Hbb-b1
A2AFQ2	A2AFQ2	HCD2	Hsd17b10
Q61425	HCDH	HCDH	Hadh
Q640R3	HECAM	HECAM	Hepacam
A0A494BAI5	A0A494BAI5	HEMH	Fech
Q8QZS1	HIBCH	HIBCH	Hibch
Q9D0S9	HINT2	HINT2	Hint2
P38060	HMGCL	HMGCL	Hmgcl
Q9Z2Y3	HOME1	HOME1	Homer1
E9Q0U7	E9Q0U7	HS105	Hsph1
Q8K0U4	HS12A	HS12A	Hspa12a
P48722	HS74L	HS74L	Hspa4l
P07901	HS90A	HS90A	Hsp90aa1
P11499	HS90B	HS90B	Hsp90ab1
Q3U2G2	Q3U2G2	HSP74	Hspa4
P63017	HSP7C	HSP7C	Hspa8
D3YX27	D3YX27	HTRA2	Htra2
G3UVV4	G3UVV4	HXK1	Hk1
I3ITR1	I3ITR1	I3ITR1	AK157302
Q3TZT4	Q3TZT4	I5P1	Inpp5a
Q60625	ICAM5	ICAM5	Icam5
Q9D6R2	IDH3A	IDH3A	Idh3a
P70404	IDHG1	IDHG1	Idh3g
P54071	IDHP	IDHP	Idh2
A0A0A0MQM0	A0A0A0MQM0	IF5A1	Eif5a
G3UYZ1	G3UYZ1	IGSF8	Igsf8
Q80ZJ2	Q80ZJ2	IMPA1	Impa1
D3Z636	D3Z636	IPYR2	Ppa2
A0A1D5RM83	A0A1D5RM83	IQEC1	Iqsec1
P85094	ISC2A	ISC2A	Isoc2a
P11881	ITPR1	ITPR1	Itpr1
Q9JHI5	IVD	IVD	Ivd
Q9R0Y5	KAD1	KAD1	Ak1
Q9WTP7	KAD3	KAD3	Ak3
A2ARF6	A2ARF6	KAD4	Ak4
A0A0A6YX73	A0A0A6YX73	KAP2	Prkar2a
P31324	KAP3	KAP3	Prkar2b
P11798	KCC2A	KCC2A	Camk2a
Q5SVJ0	Q5SVJ0	KCC2B	Camk2b
A0A0G2JGS4	A0A0G2JGS4	KCC2D	Camk2d
A0A2I3BQP6	A0A2I3BQP6	KCC2G	Camk2g
Q04447	KCRB	KCRB	Ckb
P30275	KCRU	KCRU	Ckmt1
E0CZ72	E0CZ72	KIF2A	Kif2a
Q61768	KINH	KINH	Kif5b
P63318	KPCG	KPCG	Prkcg
P52480	KPYM	KPYM	Pkm
A2AFG8	A2AFG8	L1CAM	L1cam
F6RJV6	F6RJV6	LANC2	Lancl2
Q61792	LASP1	LASP1	Lasp1
A0A1B0GSX0	A0A1B0GSX0	LDHA	Ldha
A0A6I8MX27	A0A6I8MX27	LDHB	Ldhb
Q9Z2I0	LETM1	LETM1	Letm1
A0A0G2JGB7	A0A0G2JGB7	LGI1	Lgi1
A9DA50	A9DA50	LIGO1	Lingo1
Q9DC07	LNEBL	LNEBL	Nebl
Q8CGK3	LONM	LONM	Lonp1
Q6PB66	LPPRC	LPPRC	Lrpprc
A0A0R4J0I9	A0A0R4J0I9	LRP1	Lrp1
A0A087WP70	A0A087WP70	LSAMP	Lsamp
Q8K356	Q8K356	LY6H	Ly6h
Q9CR62	M2OM	M2OM	Slc25a11
Q922B1	MACD1	MACD1	Macrod1
A0A0A0MQA6	A0A0A0MQA6	MACF1	Macf1
Q3ZB60	Q3ZB60	MAG	Mag
Q8BI08	MAL2	MAL2	Mal2
Q99KE1	MAOM	MAOM	Me2
Q8BMF3	MAON	MAON	Me3
A2ARP8	A2ARP8	MAP1A	Map1a
P14873	MAP1B	MAP1B	Map1b
A0A0G2JDN7	A0A0G2JDN7	MAP4	Map4
Q7TSJ2	MAP6	MAP6	Map6
Q922Q1	MARC2	MARC2	Mtarc2
P26645	MARCS	MARCS	Marcks
Q6PER3	MARE3	MARE3	Mapre3
A0A498WGS3	A0A498WGS3	MBP	Mbp
Q99MR8	MCCA	MCCA	Mccc1
Q3ULD5	MCCB	MCCB	Mccc2
Q3UMR5	MCU	MCU	Mcu
A0A5F8MPN8	A0A5F8MPN8	MDHC	Mdh1
P08249	MDHM	MDHM	Mdh2
Q9DCS3	MECR	MECR	Mecr
Q80U63	MFN2	MFN2	Mfn2
D3Z0L4	D3Z0L4	MIC19	Chchd3
Q91VN4	MIC25	MIC25	Chchd6
Q9DCZ4	MIC26	MIC26	Apoo
Q8CAQ8	MIC60	MIC60	Immt
F6WMX7	F6WMX7	MICU3	Micu3
Q8BG51	MIRO1	MIRO1	Rhot1
Q9CXJ4	MITOS	MITOS	Abcb8
Q9EQ20	MMSA	MMSA	Aldh6a1
Q3UY21	Q3UY21	MOG	Mog
P31938	MP2K1	MP2K1	Map2k1
D3Z786	D3Z786	MPC1	Mpc1
G5E902	G5E902	MPCP	Slc25a3
Q9WV34	MPP2	MPP2	Mpp2
A0A668KLC6	A0A668KLC6	MTAP2	Map2
A0A3Q4EBT8	A0A3Q4EBT8	MTCH1	Mtch1
Q791V5	MTCH2	MTCH2	Mtch2
O88441	MTX2	MTX2	Mtx2
P16332	MUTA	MUTA	Mmut
B2RRE2	B2RRE2	MY18A	Myo18a
Q3UH59	Q3UH59	MYH10	Myh10
A0A1W2P6F6	A0A1W2P6F6	MYL6	Myl6
D3YZ62	D3YZ62	MYO5A	Myo5a
E9PVU0	E9PVU0	MYO6	Myo6
P60202	MYPR	MYPR	Plp1
Q8K596	NAC2	NAC2	Slc8a2
A0A7N9VS49	A0A7N9VS49	NAKD2	Nadk2
F2Z456	F2Z456	NB5R3	Cyb5r3
E9QB01	E9QB01	NCAM1	Ncam1
O35136	NCAM2	NCAM2	Ncam2
Q9Z0E0	NCDN	NCDN	Ncdn
A2AS98	A2AS98	NCKP1	Nckap1
E9PZF0	E9PZF0	NDKA	Nme1
Q9QYG0	NDRG2	NDRG2	Ndrg2
Q9CQ75	NDUA2	NDUA2	Ndufa2
A0A0N4SVQ1	A0A0N4SVQ1	NDUA4	Ndufa4
Q9CPP6	NDUA5	NDUA5	Ndufa5
Q9CQZ5	NDUA6	NDUA6	Ndufa6
Q9Z1P6	NDUA7	NDUA7	Ndufa7
Q9DCJ5	NDUA8	NDUA8	Ndufa8
A0A0R3P9C8	A0A0R3P9C8	NDUA9	Ndufa9
Q99LC3	NDUAA	NDUAA	Ndufa10
G5E814	G5E814	NDUAB	Ndufa11
Q7TMF3	NDUAC	NDUAC	Ndufa12
Q9ERS2	NDUAD	NDUAD	Ndufa13
Q9CQC7	NDUB4	NDUB4	Ndufb4
D3Z568	D3Z568	NDUB5	Ndufb5
Q9CR61	NDUB7	NDUB7	Ndufb7
Q9D6J5	NDUB8	NDUB8	Ndufb8
Q9CQJ8	NDUB9	NDUB9	Ndufb9
Q9DCS9	NDUBA	NDUBA	Ndufb10
Q9CQ54	NDUC2	NDUC2	Ndufc2
Q91VD9	NDUS1	NDUS1	Ndufs1
Q91WD5	NDUS2	NDUS2	Ndufs2
Q9DCT2	NDUS3	NDUS3	Ndufs3
E9QPX3	E9QPX3	NDUS4	Ndufs4
B1ARW4	B1ARW4	NDUS5	Ndufs5
A0A1Y7VM38	A0A1Y7VM38	NDUS6	Ndufs6
Q9DC70	NDUS7	NDUS7	Ndufs7
D3YUM1	D3YUM1	NDUV1	Ndufv1
Q9D6J6	NDUV2	NDUV2	Ndufv2
Q9CR95	NECP1	NECP1	Necap1
A0A4W9	A0A4W9	NEGR1	Negr1
P06837	NEUM	NEUM	Gap43
Q810U3	NFASC	NFASC	Nfasc
P19246	NFH	NFH	Nefh
P08551	NFL	NFL	Nefl
A0A0R4J036	A0A0R4J036	NFM	Nefm
Q9Z1J3	NFS1	NFS1	Nfs1
O55125	NIPS1	NIPS1	Nipsnap1
Q7TMG8	Q7TMG8	NIPS2	Nipsnap2
A2AI14	A2AI14	NMDZ1	Grin1
J3QMM7	J3QMM7	NNRD	Naxd
A3KGE4	A3KGE4	NOE1	Olfm1
P97300	NPTN	NPTN	Nptn
Q62443	NPTX1	NPTX1	Nptx1
E0CY11	E0CY11	NRX1A	Nrxn1
P46460	NSF	NSF	Nsf
Q3UHB1	NT5D3	NT5D3	Nt5dc3
D3Z396	D3Z396	NTRI	Ntm
P03921	NU5M	NU5M	Mtnd5
Q9D8W7	OCAD2	OCAD2	Ociad2
P53395	ODB2	ODB2	Dbt
Q60597	ODO1	ODO1	Ogdh
Q9D2G2	ODO2	ODO2	Dlst
Q8BMF4	ODP2	ODP2	Dlat
P35486	ODPA	ODPA	Pdha1
Q9D051	ODPB	ODPB	Pdhb
Q8BKZ9	ODPX	ODPX	Pdhx
G3XA53	G3XA53	OMGP	Omg
P58281	OPA1	OPA1	Opa1
D3YWF6	D3YWF6	OTUB1	Otub1
E9Q0A7	E9Q0A7	OXR1	Oxr1
Q922Q4	P5CR2	P5CR2	Pycr2
Q9Z110	P5CS	P5CS	Aldh18a1
Q61644	PACN1	PACN1	Pacsin1
Q9Z0P4	PALM	PALM	Palm
Q9JLB0	PALS2	PALS2	Pals2
Q91ZA3	PCCA	PCCA	Pcca
Q99MN9	PCCB	PCCB	Pccb
A0A0R4J0G0	A0A0R4J0G0	PCKGM	Pck2
Q9QYX7	PCLO	PCLO	Pclo
Q9QXV0	PCS1N	PCS1N	Pcsk1n
P27773	PDIA3	PDIA3	Pdia3
Q8BFP9	PDK1	PDK1	Pdk1
Q62048	PEA15	PEA15	Pea15
P70296	PEBP1	PEBP1	Pebp1
P12382	PFKAL	PFKAL	Pfkl
P47857	PFKAM	PFKAM	Pfkm
Q8C605	Q8C605	PFKAP	Pfkp
Q9DBJ1	PGAM1	PGAM1	Pgam1
P09411	PGK1	PGK1	Pgk1
A2CEK3	A2CEK3	PGM1	Pgm1
P67778	PHB1	PHB1	Phb1
O35129	PHB2	PHB2	Phb2
Q80TL4	PHF24	PHF24	Phf24
Q8K0S0	PHYIP	PHYIP	Phyhip
A0A140T8I9	A0A140T8I9	PI4KA	Pi4ka
E0CYV0	E0CYV0	PIMT	Pcmt1
Q9Z1B3	PLCB1	PLCB1	Plcb1
Q9QXS1	PLEC	PLEC	Plec
Q99JY8	PLPP3	PLPP3	Plpp3
A0A0G2JGY9	A0A0G2JGY9	PLPR4	Plppr4
P62137	PP1A	PP1A	Ppp1ca
P63328	PP2BA	PP2BA	Ppp3ca
P17742	PPIA	PPIA	Ppia
P24369	PPIB	PPIB	Ppib
Q9CR16	PPID	PPID	Ppid
B1AXW5	B1AXW5	PRDX1	Prdx1
Q61171	PRDX2	PRDX2	Prdx2
P20108	PRDX3	PRDX3	Prdx3
P99029	PRDX5	PRDX5	Prdx5
Q6GT24	Q6GT24	PRDX6	Prdx6
Q9WU79	PROD	PROD	Prodh
P62962	PROF1	PROF1	Pfn1
D3YWS3	D3YWS3	PROF2	Pfn2
E9PUL5	PRRT2	PRRT2	Prrt2
Q11011	PSA	PSA	Npepps
A0A0G2JF97	A0A0G2JF97	PSA5	Psma5
O55234	PSB5	PSB5	Psmb5
Q8BGC4	PTGR3	PTGR3	Ptgr3
P80560	PTPR2	PTPR2	Ptprn2
B2RXS8	B2RXS8	PTPRZ	Ptprz1
Q3U125	Q3U125	PXL2A	Prxl2a
Q9DB60	PXL2B	PXL2B	Prxl2b
G5E8R3	G5E8R3	PYC	Pcx
Q8CI94	PYGB	PYGB	Pygb
E9PUM3	E9PUM3	PYGM	Pygm
Q68FG2	Q68FG2	Q68FG2	Sptbn2
Q91VA7	Q91VA7	Q91VA7	Idh3b
Q9CZ13	QCR1	QCR1	Uqcrc1
Q9DB77	QCR2	QCR2	Uqcrc2
Q9CQB4	Q9CQB4	QCR7	Uqcrb
Q9CQ69	QCR8	QCR8	Uqcrq
A0A0A6YWZ0	A0A0A6YWZ0	QORL2	Cryzl2
P61027	RAB10	RAB10	Rab10
Q91V41	RAB14	RAB14	Rab14
P62821	RAB1A	RAB1A	Rab1A
P35282	RAB21	RAB21	Rab21
P53994	RAB2A	RAB2A	Rab2a
Q6PHN9	RAB35	RAB35	Rab35
P63011	RAB3A	RAB3A	Rab3a
A0A286YDR2	A0A286YDR2	RAB3C	Rab3c
Q8C266	Q8C266	RAB5C	Rab5c
P35279	RAB6A	RAB6A	Rab6a
P51150	RAB7A	RAB7A	Rab7a
P61028	RAB8B	RAB8B	Rab8b
P63321	RALA	RALA	Rala
A0A0G2JDL9	A0A0G2JDL9	RAP1A	Rap1a
Q9ERI6	RDH14	RDH14	Rdh14
G3X8R0	G3X8R0	REEP5	Reep5
A0A0A6YXF6	A0A0A6YXF6	RHOA	Rhoa
P62746	RHOB	RHOB	Rhob
P52760	RIDA	RIDA	Rida
P35979	RL12	RL12	Rpl12
A0A1B0GQU8	A0A1B0GQU8	RL18	Rpl18
P27659	RL3	RL3	Rpl3
P62918	RL8	RL8	Rpl8
Q9DB15	RM12	RM12	Mrpl12
P47708	RP3A	RP3A	Rph3a
Q9EQZ6	RPGF4	RPGF4	Rapgef4
Q91YQ5	RPN1	RPN1	Rpn1
Q8K0T0	RTN1	RTN1	Rtn1
Q99P72	RTN4	RTN4	Rtn4
A0A076FR46	A0A076FR46	S12A5	Slc12a5
Q8BH59	S2512	S2512	Slc25a12
Q8BGP6	S2540	S2540	Slc25a40
A0A0A6YWF5	A0A0A6YWF5	S38A3	Slc38a3
Q5DTL9	S4A10	S4A10	Slc4a10
E9Q8N8	E9Q8N8	S4A4	Slc4a4
P31650	S6A11	S6A11	Slc6a11
Q80SW1	SAHH2	SAHH2	Ahcyl1
F8WGT1	F8WGT1	SAHH3	Ahcyl2
Q8BGH2	SAM50	SAM50	Samm50
J3QPG5	J3QPG5	SAP	Psap
O35874	SATT	SATT	Slc1a4
P31648	SC6A1	SC6A1	Slc6a1
B2RQX9	B2RQX9	SC6A5	Slc6a5
Q8C8N2	SCAI	SCAI	Scai
Q3TSA8	Q3TSA8	SCAM1	Scamp1
Q9JKD3	SCAM5	SCAM5	Scamp5
A2ASZ8	SCMC2	SCMC2	Slc25a25
Q6GQS1	SCMC3	SCMC3	Slc25a23
A0A5H1ZRM8	A0A5H1ZRM8	SCN2A	Scn2a
Q3UJQ9	Q3UJQ9	SCOT1	Oxct1
P32020	SCP2	SCP2	Scp2
Q8R127	SCPDL	SCPDL	Sccpdh
O35114	SCRB2	SCRB2	Scarb2
Q9CZC8	SCRN1	SCRN1	Scrn1
Q8K2B3	SDHA	SDHA	Sdha
Q9CQA3	SDHB	SDHB	Sdhb
A0A0J9YTY0	A0A0J9YTY0	SEPT11	Septin11
D3YYB1	D3YYB1	SEPT2	Septin2
A0A2R8W6V9	A0A2R8W6V9	SEPT3	Septin3
A0A338P6R8	A0A338P6R8	SEPT5	Septin5
E9Q1G8	E9Q1G8	SEPT7	Septin7
B1AQY9	B1AQY9	SEPT8	Septin8
A2A6U3	A2A6U3	SEPT9	Septin9
Q61753	SERA	SERA	Phgdh
Q99K85	SERC	SERC	Psat1
Q99JR1	SFXN1	SFXN1	Sfxn1
Q3U4F0	Q3U4F0	SFXN3	Sfxn3
Q8BRQ9	Q8BRQ9	SFXN5	Sfxn5
D3YZU4	D3YZU4	SHAN1	Shank1
A0A1C7ZMY3	A0A1C7ZMY3	SHAN2	Shank2
Q4ACU6	SHAN3	SHAN3	Shank3
A2AWI7	A2AWI7	SHLB2	Sh3glb2
P97797	SHPS1	SHPS1	Sirpa
Q8C3Q5	SHSA7	SHSA7	Shisa7
A0A140LHL5	A0A140LHL5	SIR2	Sirt2
Q9DB05	SNAA	SNAA	Napa
P28663	SNAB	SNAB	Napb
D3Z4B2	D3Z4B2	SNAG	Napg
O55100	SNG1	SNG1	Syngr1
Q8R191	SNG3	SNG3	Syngr3
P60879	SNP25	SNP25	Snap25
B2FDF6	B2FDF6	SNP47	Snap47
Q80U23	SNPH	SNPH	Snph
P08228	SODC	SODC	Sod1
P09671	SODM	SODM	Sod2
Q6NZL0	SOGA3	SOGA3	Soga3
G3UXX3	G3UXX3	SPRE	Spr
E9Q397	E9Q397	SPTB1	Sptb
Q62261	SPTB2	SPTB2	Sptbn1
A3KGU7	A3KGU7	SPTN1	Sptan1
Q921L6	Q921L6	SRC8	Cttn
A0A571BDG0	A0A571BDG0	SRCN1	Srcin1
Q8BWF0	SSDH	SSDH	Aldh5a1
Q99JB2	STML2	STML2	Stoml2
D3Z1Z8	D3Z1Z8	STMN1	Stmn1
O35526	STX1A	STX1A	Stx1a
P61264	STX1B	STX1B	Stx1b
O08599	STXB1	STXB1	Stxbp1
Q9WUM5	SUCA	SUCA	Suclg1
Q9Z2I9	SUCB1	SUCB1	Sucla2
Q9Z2I8	SUCB2	SUCB2	Suclg2
Q9JIS5	SV2A	SV2A	Sv2a
Q8BG39	SV2B	SV2B	Sv2b
A0A0A6YVS6	A0A0A6YVS6	SYGP1	Syngap1
Q8BIJ6	SYIM	SYIM	Iars2
O88935	SYN1	SYN1	Syn1
Q64332	SYN2	SYN2	Syn2
D3Z656	D3Z656	SYNJ1	Synj1
Q8CC35	SYNPO	SYNPO	Synpo
Q62277	SYPH	SYPH	Syp
P46096	SYT1	SYT1	Syt1
A0A0R4J2C2	A0A0R4J2C2	SYT2	Syt2
O55042	SYUA	SYUA	Snca
Q91ZZ3	SYUB	SYUB	Sncb
Q9R1Q8	TAGL3	TAGL3	Tagln3
B1AQW2	B1AQW2	TAU	Mapt
A0A0A0MQA5	A0A0A0MQA5	TBA4A	Tuba4a
Q9ERD7	TBB3	TBB3	Tubb3
Q9D6F9	TBB4A	TBB4A	Tubb4a
P99024	TBB5	TBB5	Tubb5
P11983	TCPA	TCPA	Tcp1
P80314	TCPB	TCPB	Cct2
G5E839	G5E839	TCPD	Cct4
P80316	TCPE	TCPE	Cct5
P80318	TCPG	TCPG	Cct3
P80313	TCPH	TCPH	Cct7
P42932	TCPQ	TCPQ	Cct8
Q52KG9	Q52KG9	TCPZ	Cct6a
A0A0G2JFB2	A0A0G2JFB2	TDRKH	Tdrkh
Q8BYI9	TENR	TENR	Tnr
Q01853	TERA	TERA	Vcp
Q3UUI3	THEM4	THEM4	Them4
Q8QZT1	THIL	THIL	Acat1
Q8BWT1	THIM	THIM	Acaa2
P10639	THIO	THIO	Txn
Q99J99	THTM	THTM	Mpst
P52196	THTR	THTR	Tst
A0A1L1SUX8	A0A1L1SUX8	THY1	Thy1
P62073	TIM10	TIM10	Timm10
A0A1W2P756	A0A1W2P756	TIM13	Timm13
O35857	TIM44	TIM44	Timm44
Q9D880	TIM50	TIM50	Timm50
Q9WV98	TIM9	TIM9	Timm9
P40142	TKT	TKT	Tkt
Q4VAE3	TMM65	TMM65	Tmem65
Q9JKK7	TMOD2	TMOD2	Tmod2
Q9CPQ3	TOM22	TOM22	Tomm22
Q9CZW5	TOM70	TOM70	Tomm70
A2AUD5	A2AUD5	TPD54	Tpd52l2
P17751	TPIS	TPIS	Tpi1
G5E8R0	G5E8R0	TPM1	Tpm1
O89023	TPP1	TPP1	Tpp1
Q7TQD2	TPPP	TPPP	Tppp
Q9CRB6	TPPP3	TPPP3	Tppp3
Q9CQN1	TRAP1	TRAP1	Trap1
Q8JZU2	TXTP	TXTP	Slc25a1
Q02053	UBA1	UBA1	Uba1
P61089	UBE2N	UBE2N	Ube2n
Q3U4W8	Q3U4W8	UBP5	Usp5
Q9R0P9	UCHL1	UCHL1	Uchl1
Q9CR68	UCRI	UCRI	Uqcrfs1
P51863	VA0D1	VA0D1	Atp6v0d1
A0A0N4SUV3	A0A0N4SUV3	VAMP1	Vamp1
B0QZN5	B0QZN5	VAMP2	Vamp2
Q8BH80	Q8BH80	VAPB	Vapb
Q62465	VAT1	VAT1	Vat1
P50516	VATA	VATA	Atp6v1a
P62814	VATB2	VATB2	Atp6v1b2
Q9Z1G3	VATC1	VATC1	Atp6v1c1
P57746	VATD	VATD	Atp6v1d
P50518	VATE1	VATE1	Atp6v1e1
Q9WTT4	VATG2	VATG2	Atp6v1g2
A0A0A6YWP6	A0A0A6YWP6	VATH	Atp6v1h
Q60932	VDAC1	VDAC1	Vdac1
G3UX26	G3UX26	VDAC2	Vdac2
J3QMG3	J3QMG3	VDAC3	Vdac3
O35633	VIAAT	VIAAT	Slc32a1
P20152	VIME	VIME	Vim
P62761	VISL1	VISL1	Vsnl1
K3W4T3	K3W4T3	VPP1	Atp6v0a1
Q9EQH3	VPS35	VPS35	Vps35
O88342	WDR1	WDR1	Wdr1
Q8CBE3	WDR37	WDR37	Wdr37
Q920I9	WDR7	WDR7	Wdr7
Q3UZJ4	Q3UZJ4	2A5E	Ppp2r5e
Q7TNL5	Q7TNL5	2A5G	Ppp2r5c
A0A1Y7VKY1	A0A1Y7VKY1	A0A1Y7VKY1	Rps18-ps5
A0A0G2JDI9	A0A0G2JDI9	ABCD3	Abcd3
Q9Z1Q2	ABHGA	ABHGA	Abhd16a
A0A087WRS3	A0A087WRS3	ABI2	Abi2
M0QWU8	M0QWU8	ACBP	Dbi
D3Z041	D3Z041	ACSL1	Acsl1
A0A1L1SV25	A0A1L1SV25	ACTN4	Actn4
P56375	ACYP2	ACYP2	Acyp2
A2AJA9	AJM1	AJM1	Ajm1
D3YVF0	AKAP5	AKAP5	Akap5
P24549	AL1A1	AL1A1	Aldh1a1
A0A0R4J2A2	A0A0R4J2A2	ANS1B	Anks1b
Q8R2R9	AP3M2	AP3M2	Ap3m2
P62331	ARF6	ARF6	Arf6
Q3TGS9	Q3TGS9	ARFG1	Arfgap1
Q8CG76	ARK72	ARK72	Akr7a2
Q9D0L7	ARM10	ARM10	Armc10
H3BJY2	H3BJY2	ASAP1	Asap1
Q8BHE3	ATCAY	ATCAY	Atcay
A0A1Y7VLP0	A0A1Y7VLP0	ATP68	Atp5mpl
A0A0U1RNL7	A0A0U1RNL7	BCKD	Bckdk
Q9JM96	BORG4	BORG4	Cdc42ep4
Q9DB72	BTBDH	BTBDH	Btbd17
F8WGB3	F8WGB3	C560	Sdhc
E9Q683	E9Q683	CA2D2	Cacna2d2
H7BX88	H7BX88	CACP	Crat
P70408	CAD10	CAD10	Cdh10
Q8CAK1	CAF17	CAF17	Iba57
P12658	CALB1	CALB1	Calb1
D3YTR7	D3YTR7	CAP2	Cap2
Q9R013	CATF	CATF	Ctsf
P53702	CCHL	CCHL	Hccs
P60766	CDC42	CDC42	Cdc42
Q9D8B3	CHM4B	CHM4B	Chmp4b
B1AWD8	B1AWD8	CLCA	Clta
Q8R4N0	CLYBL	CLYBL	Clybl
Q8BIG7	CMTD1	CMTD1	Comtd1
O89053	COR1A	COR1A	Coro1a
A0A494B9Y4	A0A494B9Y4	COR1B	Coro1b
Q9WUM4	COR1C	COR1C	Coro1c
Q9CQI6	COTL1	COTL1	Cotl1
P97742	CPT1A	CPT1A	Cpt1a
O54983	CRYM	CRYM	Crym
G3XA35	G3XA35	CSPG2	Vcan
E0CY88	E0CY88	CYB5	Cyb5a
Q7TMB8	CYFP1	CYFP1	Cyfip1
D3YUS2	D3YUS2	D3YUS2	6430548M08Rik
Q62418	DBNL	DBNL	Dbnl
A0A1D5RM94	A0A1D5RM94	DC1L2	Dync1li2
D3YX34	D3YX34	DCTN1	Dctn1
Q91VR5	DDX1	DDX1	Ddx1
P16381	DDX3L	DDX3L	D1Pas1
O70503	DHB12	DHB12	Hsd17b12
Q5PR73	DIRA2	DIRA2	Diras2
A2BEE9	A2BEE9	DLG3	Dlg3
B1AZP2	DLGP4	DLGP4	Dlgap4
A2AVR9	A2AVR9	DLRB1	Dynlrb1
E9PWE8	E9PWE8	DPYL3	Dpysl3
Q9QXS6	DREB	DREB	Dbn1
B1AQF4	B1AQF4	DUS3	Dusp3
E0CXD4	E0CXD4	E0CXD4	Pcdh1
E9PX29	E9PX29	E9PX29	Sptbn4
A0A087WS46	A0A087WS46	EF1B	Eef1b2
Q9D8N0	EF1G	EF1G	Eef1g
P62869	ELOB	ELOB	Elob
Q03137	EPHA4	EPHA4	Epha4
P57759	ERP29	ERP29	Erp29
Q9CPW2	FDX2	FDX2	Fdx2
P26883	FKB1A	FKB1A	Fkbp1a
G3UXL2	G3UXL2	G3UXL2	Prps1l3
Q9CZN7	GLYM	GLYM	Shmt2
Q9CQI3	GMFB	GMFB	Gmfb
Q8CGK7	GNAL	GNAL	Gnal
Q8C419	GP158	GP158	Gpr158
B0QZW1	B0QZW1	GRIA3	Gria3
Q61625	GRID2	GRID2	Grid2
P97772	GRM1	GRM1	Grm1
A0A0J9YVF0	A0A0J9YVF0	GRM2	Grm2
Q9QYS2	GRM3	GRM3	Grm3
P24472	GSTA4	GSTA4	Gsta4
Q9DCM2	GSTK1	GSTK1	Gstk1
P17809	GTR1	GTR1	Slc2a1
Q8K2C9	HACD3	HACD3	Hacd3
Q8C729	HYCC2	HYCC2	Hycc2
Q9JKR6	HYOU1	HYOU1	Hyou1
O88844	IDHC	IDHC	Idh1
P70168	IMB1	IMB1	Kpnb1
A0A1Y7VK19	A0A1Y7VK19	ISCA2	Isca2
P68181	KAPCB	KAPCB	Prkacb
Q8BNW9	KBTBB	KBTBB	Kbtbd11
A0A571BE49	A0A571BE49	KCAB2	Kcnab2
Q9JM63	KCJ10	KCJ10	Kcnj10
A0A087WQ41	A0A087WQ41	KCMA1	Kcnma1
A0A140LHI4	A0A140LHI4	KCNC3	Kcnc3
A0A0R4J093	A0A0R4J093	KCY	Cmpk1
D3YXZ3	D3YXZ3	KLC2	Klc2
P68404	KPCB	KPCB	Prkcb
Q9EP89	LACTB	LACTB	Lactb
P11438	LAMP1	LAMP1	Lamp1
P60469	LIPA3	LIPA3	Ppfia3
P63005	LIS1	LIS1	Pafah1b1
A0A0G2JDT9	A0A0G2JDT9	LRRC7	Lrrc7
F6QHD1	F6QHD1	LYRIC	Mtdh
A0A1Y7VJZ2	A0A1Y7VJZ2	MAAI	Gstz1
A0A0R4J1H0	A0A0R4J1H0	MARH5	Marchf5
Q8BL86	MBLC2	MBLC2	Mblac2
Q8CHK3	MBOA7	MBOA7	Mboat7
Q9Z2Z6	MCAT	MCAT	Slc25a20
E0CYB9	E0CYB9	MFF	Mff
D3YYS6	D3YYS6	MGLL	Mgll
Q9CPU4	MGST3	MGST3	Mgst3
Q8R404	MIC13	MIC13	Micos13
Q78IK4	MIC27	MIC27	Apool
Q8VCX5	MICU1	MICU1	Micu1
Q3URS9	MITOK	MITOK	Ccdc51
E9Q4B5	E9Q4B5	MIX23	Ccdc58
Q3THE2	ML12B	ML12B	Myl12b
Q9D023	MPC2	MPC2	Mpc2
P28667	MRP	MRP	Marcksl1
Q78J03	MSRB2	MSRB2	Msrb2
A0A6I8MWZ8	A0A6I8MWZ8	MTX1	Mtx1
D3YVA2	D3YVA2	NCALD	Ncald
Q8VCV2	Q8VCV2	NDRG3	Ndrg3
Q9D1H6	NDUF4	NDUF4	Ndufaf4
A2APY7	NDUF5	NDUF5	Ndufaf5
Q8K3J1	NDUS8	NDUS8	Ndufs8
Q6R891	NEB2	NEB2	Ppp1r9b
A0A0N4SUH8	A0A0N4SUH8	NFU1	Nfu1
P70441	NHRF1	NHRF1	Slc9a3r1
Q69ZK9	NLGN2	NLGN2	Nlgn2
Q9CQE1	NPS3B	NPS3B	Nipsnap3b
A0A1W2P7Y9	A0A1W2P7Y9	NRCAM	Nrcam
Q9CZ44	NSF1C	NSF1C	Nsfl1c
P29758	OAT	OAT	Oat
A0A0J9YUK7	A0A0J9YUK7	OCAD1	Ociad1
Q6P3A8	ODBB	ODBB	Bckdhb
Q8CGY8	OGT1	OGT1	Ogt
B1AYJ9	B1AYJ9	OLA1	Ola1
Q05D16	Q05D16	OX2G	Cd200
A0A1L1SVK0	A0A1L1SVK0	PA1B2	Pafah1b2
P50580	PA2G4	PA2G4	Pa2g4
G5E884	G5E884	PAK1	Pak1
Q99LX0	PARK7	PARK7	Park7
P60335	PCBP1	PCBP1	Pcbp1
A0A1B0GRJ9	A0A1B0GRJ9	PDE2A	Pde2a
Q9JK42	PDK2	PDK2	Pdk2
Q922H2	PDK3	PDK3	Pdk3
A2AJP9	A2AJP9	PDP1	Pdp1
D6RD07	D6RD07	PDPR	Pdpr
A0A0G2JG95	A0A0G2JG95	PGAM5	Pgam5
Q8BWM0	PGES2	PGES2	Ptges2
Q8CAA7	PGM2L	PGM2L	Pgm2l1
Q8CHP8	PGP	PGP	Pgp
Q8BGT8	PHIPL	PHIPL	Phyhipl
Q80XI4	PI42B	PI42B	Pip4k2b
F8WHW6	F8WHW6	PI51C	Pip5k1c
O35405	PLD3	PLD3	Pld3
P60487	PLPP	PLPP	Pdxp
Q3UM45	PP1R7	PP1R7	Ppp1r7
P62715	PP2AB	PP2AB	Ppp2cb
E0CZ78	E0CZ78	PP2BB	Ppp3cb
A0A1W2P7X3	A0A1W2P7X3	PPAC	Acp1
Q99KR7	PPIF	PPIF	Ppif
F7BX26	F7BX26	PPP5	Ppp5c
Q60829	PPR1B	PPR1B	Ppp1r1b
Q6NVE9	PPTC7	PPTC7	Pptc7
Q8K411	PREP	PREP	Pitrm1
A2AGN7	A2AGN7	PRS6A	Psmc3
P32848	PRVA	PRVA	Pvalb
Q9QUM9	PSA6	PSA6	Psma6
A0A1D5RLK2	A0A1D5RLK2	PSD3	Psd3
Q9CWJ9	PUR9	PUR9	Atic
O35295	PURB	PURB	Purb
Q14AA6	Q14AA6	Q14AA6	1700009N14Rik
P99028	QCR6	QCR6	Uqcrh
Q8R1I1	QCR9	QCR9	Uqcr10
A0A3Q4EI12	A0A3Q4EI12	RAB18	Rab18
Q3TLP8	Q3TLP8	RAC1	Rac1
A0A5F8MPB9	A0A5F8MPB9	RADI	Rdx
P34022	RANG	RANG	Ranbp1
Q61411	RASH	RASH	Hras
E9Q3P9	E9Q3P9	RB11A	Rab11a
Q8BHC1	RB39B	RB39B	Rab39b
A2AH25	A2AH25	RHG01	Arhgap1
F6TZK4	F6TZK4	RIMS1	Rims1
P47963	RL13	RL13	Rpl13
P67984	RL22	RL22	Rpl22
B1ARA3	B1ARA3	RL26	Rpl26
P61358	RL27	RL27	Rpl27
Q9D8E6	RL4	RL4	Rpl4
P47911	RL6	RL6	Rpl6
P12970	RL7A	RL7A	Rpl7a
P99027	RLA2	RLA2	Rplp2
Q3TBW2	RM10	RM10	Mrpl10
Q9JKF7	RM39	RM39	Mrpl39
A0A1W2P7A1	A0A1W2P7A1	RS12	Rps12
P14131	RS16	RS16	Rps16
D3YVC1	D3YVC1	RS2	Rps2
P62908	RS3	RS3	Rps3
Q91V55	Q91V55	RS5	Rps5
P62754	RS6	RS6	Rps6
P62242	RS8	RS8	Rps8
Q80X85	RT07	RT07	Mrps7
Q9CXW2	RT22	RT22	Mrps22
Q8BK72	RT27	RT27	Mrps27
A0A0R4J1B9	A0A0R4J1B9	RT29	Dap3
Q9JIK9	RT34	RT34	Mrps34
Q9ES97	RTN3	RTN3	Rtn3
P50114	S100B	S100B	S100b
Q91V77	Q91V77	S10A1	S100a1
A0A3Q4L2U5	A0A3Q4L2U5	S2546	Slc25a46
A2AKW0	A2AKW0	S2551	Slc25a51
Q91VE0	S27A4	S27A4	Slc27a4
A0A0R4J087	A0A0R4J087	S6A17	Slc6a17
A0A5F8MP96	A0A5F8MP96	SEPT4	Septin4
Q9R1T4	SEPT6	SEPT6	Septin6
A2ALV3	A2ALV3	SH3G2	Sh3gl2
A0A1Y7VJY8	A0A1Y7VJY8	SIR5	Sirt5
D3Z781	D3Z781	SKT	Etl4
Q9R112	SQOR	SQOR	Sqor
A0A0R4J1T1	A0A0R4J1T1	SRBS2	Sorbs2
F8VPQ4	F8VPQ4	SRGP3	Srgap3
Q60864	STIP1	STIP1	Stip1
Q9ER00	STX12	STX12	Stx12
Q8BH40	Q8BH40	STX7	Stx7
D3Z079	D3Z079	STXB5	Stxbp5
Q8VDC0	SYLM	SYLM	Lars2
Q499X9	SYMM	SYMM	Mars2
Q8JZP2	SYN3	SYN3	Syn3
Q8C483	Q8C483	SYSC	Sars
Q9JJL8	SYSM	SYSM	Sars2
Q920N7	SYT12	SYT12	Syt12
G3X9Y1	G3X9Y1	SYT3	Syt3
P68369	TBA1A	TBA1A	Tuba1a
P63028	TCTP	TCTP	Tpt1
Q9R0Q7	TEBP	TEBP	Ptges3
Q8BH55	THNS1	THNS1	Thnsl1
A0A1L1SQ51	A0A1L1SQ51	TLN2	Tln2
Q8BK08	TMM11	TMM11	Tmem11
A0A0R4J1Z3	A0A0R4J1Z3	TMM33	Tmem33
Q8C5G6	Q8C5G6	TOLIP	Tollip
Q3UDC3	Q3UDC3	TOM1	Tom1
Q9JMH6	TRXR1	TRXR1	Txnrd1
A0A1Y7VL44	A0A1Y7VL44	TTC7B	Ttc7b
Q9D3A9	TTYH1	TTYH1	Ttyh1
A0A0G2JE32	A0A0G2JE32	UB2D3	Ube2d3
Q91ZJ5	UGPA	UGPA	Ugp2
F6V305	F6V305	UQCC1	Uqcc1
Q9WV55	VAPA	VAPA	Vapa
Q80TB8	VAT1L	VAT1L	Vat1l
Q0VGU4	VGF	VGF	Vgf
A0A1B0GRU0	A0A1B0GRU0	VGLU1	Slc17a7
Q8C0E2	VP26B	VP26B	Vps26b
Q8CC88	VWA8	VWA8	Vwa8
Q9CQW1	YKT6	YKT6	Ykt6

## Sheet: PPT1 KO - 4M
PPT1 KO 4 Month Lipofuscin Proteome (n = 935)
UniProt Accession	SWISSPROT Accession	UniProt ID	Gene Name
Q9CQV8	1433B	1433B	Ywhab
P62259	1433E	1433E	Ywhae
P68510	1433F	1433F	Ywhah
P61982	1433G	1433G	Ywhag
P68254	1433T	1433T	Ywhaq
P63101	1433Z	1433Z	Ywhaz
Q76MZ3	2AAA	2AAA	Ppp2r1a
Q6P1F6	2ABA	2ABA	Ppp2r2a
Q99L13	3HIDH	3HIDH	Hibadh
P10852	4F2	4F2	Slc3a2
A0A0A6YW67	A0A0A6YW67	A0A0A6YW67	Gm8797
A2ALL9	A2ALL9	A2ALL9	Atp2b3
Q3UHJ0	AAK1	AAK1	Aak1
P05201	AATC	AATC	Got1
P05202	AATM	AATM	Got2
Q61102	ABCB7	ABCB7	Abcb7
Q6PE15	ABHDA	ABHDA	Abhd10
E9Q030	E9Q030	ABLM1	Ablim1
Q8BL65	ABLM2	ABLM2	Ablim2
A0A0R4J0P1	A0A0R4J0P1	ACAD8	Acad8
Q8JZN5	ACAD9	ACAD9	Acad9
A0A0R4J083	A0A0R4J083	ACADL	Acadl
P45952	ACADM	ACADM	Acadm
Q07417	ACADS	ACADS	Acads
B1AR28	B1AR28	ACADV	Acadvl
Q99PU5	ACBG1	ACBG1	Acsbg1
M0QWU8	M0QWU8	ACBP	Dbi
E9Q5L3	E9Q5L3	ACDSB	Acadsb
Q91V92	ACLY	ACLY	Acly
Q9CQR4	ACO13	ACO13	Acot13
Q99KI0	ACON	ACON	Aco2
Q9QYR9	ACOT2	ACOT2	Acot2
Q9R0X4	ACOT9	ACOT9	Acot9
F6ZFT1	F6ZFT1	ACPM	Ndufab1
Q8VCW8	ACSF2	ACSF2	Acsf2
Q5ICG5	Q5ICG5	ACSL6	Acsl6
P60710	ACTB	ACTB	Actb
P63260	ACTG	ACTG	Actg1
A1BN54	A1BN54	ACTN1	Actn1
A0A1L1SV25	A0A1L1SV25	ACTN4	Actn4
A0A494BB86	A0A494BB86	ACTZ	Actr1a
E9QJT5	E9QJT5	ACYP1	Acyp1
D3YUP9	D3YUP9	ADA22	Adam22
Q9R1V7	ADA23	ADA23	Adam23
F8WGR0	F8WGR0	ADDA	Add1
Q9QYB8	ADDB	ADDB	Add2
Q9QYB5	ADDG	ADDG	Add3
Q61578	ADRO	ADRO	Fdxr
P48962	ADT1	ADT1	Slc25a4
P51881	ADT2	ADT2	Slc25a5
Q8JZQ2	AFG32	AFG32	Afg3l2
Q9ESW4	AGK	AGK	Agk
B1AU25	B1AU25	AIFM1	Aifm1
P46660	AINX	AINX	Ina
Q9JII6	AK1A1	AK1A1	Akr1a1
D3YVF0	AKAP5	AKAP5	Akap5
Q9CZS1	AL1B1	AL1B1	Aldh1b1
Q8R0Y6	AL1L1	AL1L1	Aldh1l1
B1ATI0	B1ATI0	AL3A2	Aldh3a2
Q8CHT0	AL4A1	AL4A1	Aldh4a1
Q9DBF1	AL7A1	AL7A1	Aldh7a1
Q9JLJ2	AL9A1	AL9A1	Aldh9a1
P47738	ALDH2	ALDH2	Aldh2
P05064	ALDOA	ALDOA	Aldoa
P05063	ALDOC	ALDOC	Aldoc
P45376	ALDR	ALDR	Akr1b1
A0A0G2JEG8	A0A0G2JEG8	AMPH	Amph
Q9CPY7	AMPL	AMPL	Lap3
S4R2F3	S4R2F3	ANK2	Ank2
S4R2K9	S4R2K9	ANK3	Ank3
P48036	ANXA5	ANXA5	Anxa5
F8WIT2	F8WIT2	ANXA6	Anxa6
Q64133	AOFA	AOFA	Maoa
Q8BW75	AOFB	AOFB	Maob
Q61548	AP180	AP180	Snap91
O35643	AP1B1	AP1B1	Ap1b1
Q8CBB7	Q8CBB7	AP1G1	Ap1g1
P17426	AP2A1	AP2A1	Ap2a1
P17427	AP2A2	AP2A2	Ap2a2
Q9DBG3	AP2B1	AP2B1	Ap2b1
Q3TWV4	Q3TWV4	AP2M1	Ap2m1
A0A571BES1	A0A571BES1	AP3B2	Ap3b2
O54774	AP3D1	AP3D1	Ap3d1
Q8R2R9	AP3M2	AP3M2	Ap3m2
Q7TS64	Q7TS64	ARBK1	Grk2
Q9R0Q6	ARC1A	ARC1A	Arpc1a
P61205	ARF3	ARF3	Arf3
P61750	ARF4	ARF4	Arf4
Q8CG76	ARK72	ARK72	Akr7a2
Q9CQW2	ARL8B	ARL8B	Arl8b
P61161	ARP2	ARP2	Actr2
Q99JY9	ARP3	ARP3	Actr3
Q9D898	ARP5L	ARP5L	Arpc5l
D3YXG6	D3YXG6	ARPC2	Arpc2
H7BWZ3	H7BWZ3	ARPC3	Arpc3
P59999	ARPC4	ARPC4	Arpc4
Q3UA72	Q3UA72	ARPC5	Arpc5
Q9WV54	ASAH1	ASAH1	Asah1
H3BJY2	H3BJY2	ASAP1	Asap1
Q8C0M9	ASGL1	ASGL1	Asrgl1
Q8VDN2	AT1A1	AT1A1	Atp1a1
Q6PIE5	AT1A2	AT1A2	Atp1a2
A0A0G2JGX4	A0A0G2JGX4	AT1A3	Atp1a3
P14094	AT1B1	AT1B1	Atp1b1
P14231	AT1B2	AT1B2	Atp1b2
P97370	AT1B3	AT1B3	Atp1b3
O55143	AT2A2	AT2A2	Atp2a2
G5E829	AT2B1	AT2B1	Atp2b1
S4R1C4	S4R1C4	AT2B2	Atp2b2
E9Q828	E9Q828	AT2B4	Atp2b4
Q9CQQ7	AT5F1	AT5F1	Atp5pb
A0A0M3HEP7	A0A0M3HEP7	AT8A1	Atp8a1
Q925I1	ATAD3	ATAD3	Atad3
E9PV44	E9PV44	ATIF1	Atpif1
Q8BH66	ATLA1	ATLA1	Atl1
P56382	ATP5E	ATP5E	Atp5f1e
B1ASE2	B1ASE2	ATP5H	Atp5h
Q06185	ATP5I	ATP5I	Atp5me
P97450	ATP5J	ATP5J	Atp5pf
A0A1Y7VLP0	A0A1Y7VLP0	ATP68	Atp5mpl
P03930	ATP8	ATP8	Mtatp8
Q03265	ATPA	ATPA	Atp5f1a
P56480	ATPB	ATPB	Atp5f1b
Q9D3D9	ATPD	ATPD	Atp5f1d
Q8C2Q8	Q8C2Q8	ATPG	Atp5c1
P56135	ATPK	ATPK	Atp5mf
Q78IK2	ATPMK	ATPMK	Atp5mk
Q9DB20	ATPO	ATPO	Atp5po
A0A0R4J023	A0A0R4J023	AUHM	Auh
B1B0B7	B1B0B7	AUXI	Dnajc6
B2RXT3	B2RXT3	B2RXT3	Ogdhl
E9PYH2	E9PYH2	BACH	Acot7
B1AZ46	B1AZ46	BAIP2	Baiap2
P18572	BASI	BASI	Bsg
Q91XV3	BASP1	BASP1	Basp1
F7BNZ5	F7BNZ5	BCAS1	Bcas1
A0A0U1RNL7	A0A0U1RNL7	BCKD	Bckdk
Q9CZP5	BCS1	BCS1	Bcs1l
Q80XN0	BDH	BDH	Bdh1
O08539	BIN1	BIN1	Bin1
P20029	BIP	BIP	Hspa5
Q8R164	BPHL	BPHL	Bphl
A0A1B0GRV0	A0A1B0GRV0	BPNT1	Bpnt1
O88737	BSN	BSN	Bsn
Q9DB72	BTBDH	BTBDH	Btbd17
P14106	C1QB	C1QB	C1qb
Q8R5L1	Q8R5L1	C1QBP	C1qbp
Q02105	C1QC	C1QC	C1qc
Q922D8	C1TC	C1TC	Mthfd1
Q3V3R1	C1TM	C1TM	Mthfd1l
E9Q1X8	E9Q1X8	CA2D1	Cacna2d1
Q9WTR5	CAD13	CAD13	Cdh13
D3YYT0	D3YYT0	CADH2	Cdh2
A0A668KLV1	A0A668KLV1	CADM1	Cadm1
G3UZM4	G3UZM4	CADM2	Cadm2
K4DI58	K4DI58	CADM3	Cadm3
Q8R464	CADM4	CADM4	Cadm4
Q8CAK1	CAF17	CAF17	Iba57
P00920	CAH2	CAH2	Ca2
Q08331	CALB2	CALB2	Calb2
P0DP26	CALM1	CALM1	Calm1
P14211	CALR	CALR	Calr
P35564	CALX	CALX	Canx
A0A0A6YW88	A0A0A6YW88	CAMKV	Camkv
O08529	CAN2	CAN2	Capn2
Q63810	CANB1	CANB1	Ppp3r1
Q6ZQ38	CAND1	CAND1	Cand1
P40124	CAP1	CAP1	Cap1
A0A286YCS6	A0A286YCS6	CAP2	Cap2
J3QJW3	J3QJW3	CAPS1	Cadps
P47757	CAPZB	CAPZB	Capzb
P24270	CATA	CATA	Cat
P10605	CATB	CATB	Ctsb
F8WIR1	F8WIR1	CATD	Ctsd
P47754	CAZA2	CAZA2	Capza2
Q00493	CBPE	CBPE	Cpe
P48758	CBR1	CBR1	Cbr1
Q91VT4	CBR4	CBR4	Cbr4
D3YVV1	D3YVV1	CC50A	Tmem30a
S4R2F1	S4R2F1	CCG8	Cacng8
E9Q3Q6	E9Q3Q6	CD166	Alcam
A0A2R8VI30	A0A2R8VI30	CD47	Cd47
A2AMQ5	A2AMQ5	CDS2	Cds2
Q9JKC6	CEND	CEND	Cend1
Q64433	CH10	CH10	Hspe1
P63038	CH60	CH60	Hspd1
Q9D8B3	CHM4B	CHM4B	Chmp4b
Q91WS0	CISD1	CISD1	Cisd1
Q9CZU6	CISY	CISY	Cs
F7DCH5	F7DCH5	CLAP2	Clasp2
B1AWD8	B1AWD8	CLCA	Clta
Q6IRU5	CLCB	CLCB	Cltb
Q5SXR6	Q5SXR6	CLH1	Cltc
Q9QYB1	CLIC4	CLIC4	Clic4
Q06890	CLUS	CLUS	Clu
Q3U5Q7	CMPK2	CMPK2	Cmpk2
P16330	CN37	CN37	Cnp
Q5M8N0	CNRP1	CNRP1	Cnrip1
P12960	CNTN1	CNTN1	Cntn1
O54991	CNTP1	CNTP1	Cntnap1
E9QNF7	E9QNF7	CNTP2	Cntnap2
F8WGL3	F8WGL3	COF1	Cfl1
P45591	COF2	COF2	Cfl2
Q8BMS4	COQ3	COQ3	Coq3
Q9WUM4	COR1C	COR1C	Coro1c
P00405	COX2	COX2	Mtco2
P00416	COX3	COX3	mt-Co3
P19783	COX41	COX41	Cox4i1
P12787	COX5A	COX5A	Cox5a
Q9D881	Q9D881	COX5B	Cox5b-ps
Q9CPQ1	COX6C	COX6C	Cox6c
P84086	CPLX2	CPLX2	Cplx2
Q3UYN2	Q3UYN2	CPNE6	Cpne6
P52825	CPT2	CPT2	Cpt2
O54983	CRYM	CRYM	Crym
Q60737	CSK21	CSK21	Csnk2a1
Q6P9K8	CSKI1	CSKI1	Caskin1
A0A067XG53	A0A067XG53	CSKP	Cask
Q71M36	CSPG5	CSPG5	Cspg5
P97315	CSRP1	CSRP1	Csrp1
A0A0J9YU62	A0A0J9YU62	CTBP1	Ctbp1
E0CXB9	E0CXB9	CTNA2	Ctnna2
Q02248	CTNB1	CTNB1	Ctnnb1
B7ZNF6	B7ZNF6	CTND2	Ctnnd2
P56391	CX6B1	CX6B1	Cox6b1
P48771	CX7A2	CX7A2	Cox7a2
P23242	CXA1	CXA1	Gja1
Q9D0M3	CY1	CY1	Cyc1
E0CY88	E0CY88	CYB5	Cyb5a
P62897	CYC	CYC	Cycs
Q5SQX6	CYFP2	CYFP2	Cyfip2
A0A2I3BPH9	A0A2I3BPH9	CYRIB	Cyrib
Q5M8N4	D39U1	D39U1	Sdr39u1
Q8R1Q8	DC1L1	DC1L1	Dync1li1
P48318	DCE1	DCE1	Gad1
P48320	DCE2	DCE2	Gad2
A0A0G2JGQ6	A0A0G2JGQ6	DCLK1	Dclk1
D3YX34	D3YX34	DCTN1	Dctn1
Q99KJ8	DCTN2	DCTN2	Dctn2
Q9CWS0	DDAH1	DDAH1	Ddah1
Q9CQ62	DECR	DECR	Decr1
Q9R0P5	DEST	DEST	Dstn
O70503	DHB12	DHB12	Hsd17b12
P51660	DHB4	DHB4	Hsd17b4
G3UX44	G3UX44	DHB8	H2-Ke6
P26443	DHE3	DHE3	Glud1
A0A0G2JGJ1	A0A0G2JGJ1	DHPR	Qdpr
Q99L04	DHRS1	DHRS1	Dhrs1
Q5PR73	DIRA2	DIRA2	Diras2
Q5U458	DJC11	DJC11	Dnajc11
O08749	DLDH	DLDH	Dld
D3Z3B8	D3Z3B8	DLG1	Dlg1
A0A338P6J0	A0A338P6J0	DLG2	Dlg2
A2BEE9	A2BEE9	DLG3	Dlg3
A0A338P6E5	A0A338P6E5	DLG4	Dlg4
D3Z709	D3Z709	DLGP1	Dlgap1
Q0VF59	Q0VF59	DLGP2	Dlgap2
B0V2P5	B0V2P5	DMXL2	Dmxl2
Q9QYJ0	DNJA2	DNJA2	Dnaja2
Q99M87	DNJA3	DNJA3	Dnaja3
A2AUE1	A2AUE1	DNJC5	Dnajc5
Q8K1M6	DNM1L	DNM1L	Dnm1l
Q3TVK3	Q3TVK3	DNPEP	Dnpep
A0A5F8MPK1	A0A5F8MPK1	DPP10	Dpp10
Q5U4C2	Q5U4C2	DPP6	Dpp6
P97427	DPYL1	DPYL1	Crmp1
O08553	DPYL2	DPYL2	Dpysl2
Q62188	DPYL3	DPYL3	Dpysl3
A0A0R4J1N0	A0A0R4J1N0	DPYL4	Dpysl4
Q9EQF6	DPYL5	DPYL5	Dpysl5
Q9QXS6	DREB	DREB	Dbn1
Q9JHU4	DYHC1	DYHC1	Dync1h1
P63168	DYL1	DYL1	Dynll1
A0A0J9YUN4	A0A0J9YUN4	DYN1	Dnm1
E9QLL2	E9QLL2	DYN3	Dnm3
E0CXD4	E0CXD4	E0CXD4	Pcdh1
A2AUK5	A2AUK5	E41L1	Epb41l1
O70318	E41L2	E41L2	Epb41l2
D0VYV6	D0VYV6	E41L3	Epb41l3
E9Q0F0	E9Q0F0	E9Q0F0	Krt78
P56564	EAA1	EAA1	Slc1a3
P43006	EAA2	EAA2	Slc1a2
F7B227	F7B227	ECH1	Ech1
Q8BMS1	ECHA	ECHA	Hadha
Q99JY0	ECHB	ECHB	Hadhb
Q8BH95	ECHM	ECHM	Echs1
P42125	ECI1	ECI1	Eci1
P10126	EF1A1	EF1A1	Eef1a1
P62631	EF1A2	EF1A2	Eef1a2
Q9D8N0	EF1G	EF1G	Eef1g
P58252	EF2	EF2	Eef2
Q8K0D5	EFGM	EFGM	Gfm1
Q8C845	Q8C845	EFHD2	Efhd2
A0A1W2P7T9	A0A1W2P7T9	EFR3B	Efr3b
Q8BFR5	EFTU	EFTU	Tufm
Q8C522	ENDD1	ENDD1	Endod1
P17182	ENOA	ENOA	Eno1
D3Z6E4	D3Z6E4	ENOG	Eno2
P08113	ENPL	ENPL	Hsp90b1
O55026	ENTP2	ENTP2	Entpd2
A0A1D5RLS1	A0A1D5RLS1	EP15R	Eps15l1
Q03137	EPHA4	EPHA4	Epha4
J3QNT7	J3QNT7	EPN2	Epn2
Q3UHT7	Q3UHT7	ERC2	Erc2
Q8BFZ9	ERLN2	ERLN2	Erlin2
P57759	ERP29	ERP29	Erp29
Q99LC5	ETFA	ETFA	Etfa
Q9DCW4	ETFB	ETFB	Etfb
Q6PF96	Q6PF96	ETFD	Etfdh
Q9DCM0	ETHE1	ETHE1	Ethe1
Q8C163	EXOG	EXOG	Exog
Q9CR98	F136A	F136A	Fam136a
Q9D6U8	F162A	F162A	Fam162a
Q05816	FABP5	FABP5	Fabp5
P11404	FABPH	FABPH	Fabp3
A0A0R4J094	A0A0R4J094	FAHD2	Fahd2a
F8VPU2	FARP1	FARP1	Farp1
A0A0U1RNJ1	A0A0U1RNJ1	FAS	Fasn
Q80UW2	FBX2	FBX2	Fbxo2
Q9CPW2	FDX2	FDX2	Fdx2
A2AEX6	A2AEX6	FHL1	Fhl1
G3X9U9	G3X9U9	FIS1	Fis1
P26883	FKB1A	FKB1A	Fkbp1a
O08917	FLOT1	FLOT1	Flot1
Q5SS83	Q5SS83	FLOT2	Flot2
Q61553	FSCN1	FSCN1	Fscn1
P97807	FUMH	FUMH	Fh
A2RT62	FXL16	FXL16	Fbxl16
A0A0A0MQF6	A0A0A0MQF6	G3P	Gapdh
G5E8G3	G5E8G3	G5E8G3	Opcml
P06745	G6PI	G6PI	Gpi
Q9WV18	GABR1	GABR1	Gabbr1
Q80T41	GABR2	GABR2	Gabbr2
P61922	GABT	GABT	Abat
Q9D172	GAL3A	GAL3A	Gatd3
Q8BHN3	GANAB	GANAB	Ganab
P62874	GBB1	GBB1	Gnb1
P62880	GBB2	GBB2	Gnb2
P29387	GBB4	GBB4	Gnb4
A0A0N4SVT3	A0A0N4SVT3	GBG12	Gng12
P63213	GBG2	GBG2	Gng2
P62812	GBRA1	GBRA1	Gabra1
P50571	GBRB1	GBRB1	Gabrb1
A0A0A0MQ68	A0A0A0MQ68	GCDH	Gcdh
Q80YP4	Q80YP4	GCYB1	Gucy1b1
Q3USC7	Q3USC7	GD1L1	Gdap1l1
O88741	GDAP1	GDAP1	Gdap1
P50396	GDIA	GDIA	Gdi1
Q61598	GDIB	GDIB	Gdi2
Q99PT1	GDIR1	GDIR1	Arhgdia
E9Q912	GDS1	GDS1	Rap1gds1
A0JNY3	A0JNY3	GEPH	Gphn
P03995	GFAP	GFAP	Gfap
Q9D6M3	GHC1	GHC1	Slc25a22
Q9DB41	GHC2	GHC2	Slc25a18
P15105	GLNA	GLNA	Glul
E9Q197	E9Q197	GLOD4	Glod4
Q64516	GLPK	GLPK	Gk
Q80Y14	GLRX5	GLRX5	Glrx5
D3Z7P3	GLSK	GLSK	Gls
O08795	GLU2B	GLU2B	Prkcsh
Q9CZN7	GLYM	GLYM	Shmt2
Q9CQI3	GMFB	GMFB	Gmfb
B2RSH2	GNAI1	GNAI1	Gnai1
P08752	GNAI2	GNAI2	Gnai2
P18872	GNAO	GNAO	Gnao1
P21279	GNAQ	GNAQ	Gnaq
P63094	GNAS2	GNAS2	Gnas
O70443	GNAZ	GNAZ	Gnaz
P62881	GNB5	GNB5	Gnb5
Q8C419	GP158	GP158	Gpr158
Q3ULJ0	GPD1L	GPD1L	Gpd1l
E0CXN5	E0CXN5	GPDA	Gpd1
Q64521	GPDM	GPDM	Gpd2
P35802	GPM6A	GPM6A	Gpm6a
A2AEG6	A2AEG6	GPM6B	Gpm6b
S4R1E5	S4R1E5	GPX4	Gpx4
Q7TNB5	Q7TNB5	GRIA1	Gria1
P23819	GRIA2	GRIA2	Gria2
B0QZW1	B0QZW1	GRIA3	Gria3
Q3UNH4	GRIN1	GRIN1	Gprin1
P97772	GRM1	GRM1	Grm1
Q9QYS2	GRM3	GRM3	Grm3
P38647	GRP75	GRP75	Hspa9
Q99LP6	GRPE1	GRPE1	Grpel1
Q9DCM2	GSTK1	GSTK1	Gstk1
A2AE89	A2AE89	GSTM1	Gstm1
P19157	GSTP1	GSTP1	Gstp1
P32037	GTR3	GTR3	Slc2a3
Q9R111	GUAD	GUAD	Gda
Q6ZWY9	H2B1C	H2B1C	H2bc8
P62806	H4	H4	H4c16
Q61035	HARS1	HARS1	Hars1
P01942	HBA	HBA	Hba
A8DUK4	A8DUK4	HBB1	Hbb-b1
A2AFQ2	A2AFQ2	HCD2	Hsd17b10
Q61425	HCDH	HCDH	Hadh
Q640R3	HECAM	HECAM	Hepacam
A0A494BAI5	A0A494BAI5	HEMH	Fech
Q8QZS1	HIBCH	HIBCH	Hibch
Q9D0S9	HINT2	HINT2	Hint2
P38060	HMGCL	HMGCL	Hmgcl
Q9Z2Y3	HOME1	HOME1	Homer1
E9PV73	E9PV73	HPCA	Hpca
E9Q0U7	E9Q0U7	HS105	Hsph1
Q8K0U4	HS12A	HS12A	Hspa12a
P48722	HS74L	HS74L	Hspa4l
P07901	HS90A	HS90A	Hsp90aa1
P11499	HS90B	HS90B	Hsp90ab1
Q2TPA8	HSDL2	HSDL2	Hsdl2
Q3U2G2	Q3U2G2	HSP74	Hspa4
P63017	HSP7C	HSP7C	Hspa8
Q9JIY5	HTRA2	HTRA2	Htra2
G3UVV4	G3UVV4	HXK1	Hk1
I3ITR1	I3ITR1	I3ITR1	AK157302
Q3TZT4	Q3TZT4	I5P1	Inpp5a
Q60625	ICAM5	ICAM5	Icam5
A0A1L1STE6	A0A1L1STE6	IDH3A	Idh3a
O88844	IDHC	IDHC	Idh1
P70404	IDHG1	IDHG1	Idh3g
P54071	IDHP	IDHP	Idh2
Q6ZWX6	IF2A	IF2A	Eif2s1
A0A0A0MQM0	A0A0A0MQM0	IF5A1	Eif5a
A0A0R4J117	A0A0R4J117	IGSF8	Igsf8
P70168	IMB1	IMB1	Kpnb1
Q80ZJ2	Q80ZJ2	IMPA1	Impa1
D3YUD3	D3YUD3	INP4A	Inpp4a
D3Z636	D3Z636	IPYR2	Ppa2
A0A1D5RM83	A0A1D5RM83	IQEC1	Iqsec1
P85094	ISC2A	ISC2A	Isoc2a
P11881	ITPR1	ITPR1	Itpr1
Q9JHI5	IVD	IVD	Ivd
A2A513	A2A513	K1C10	Krt10
P04104	K2C1	K2C1	Krt1
P50446	K2C6A	K2C6A	Krt6a
Q9R0Y5	KAD1	KAD1	Ak1
Q9WTP7	KAD3	KAD3	Ak3
A2ARF6	A2ARF6	KAD4	Ak4
A0A0A6YX73	A0A0A6YX73	KAP2	Prkar2a
H3BK84	H3BK84	KAP3	Prkar2b
P05132	KAPCA	KAPCA	Prkaca
Q8BNW9	KBTBB	KBTBB	Kbtbd11
A0A571BE49	A0A571BE49	KCAB2	Kcnab2
P11798	KCC2A	KCC2A	Camk2a
P28652	KCC2B	KCC2B	Camk2b
A0A0G2JGS4	A0A0G2JGS4	KCC2D	Camk2d
A0A2I3BQP6	A0A2I3BQP6	KCC2G	Camk2g
Q9JM63	KCJ10	KCJ10	Kcnj10
Q04447	KCRB	KCRB	Ckb
P30275	KCRU	KCRU	Ckmt1
A0A0R4J093	A0A0R4J093	KCY	Cmpk1
E0CZ72	E0CZ72	KIF2A	Kif2a
Q61768	KINH	KINH	Kif5b
P68404	KPCB	KPCB	Prkcb
P63318	KPCG	KPCG	Prkcg
P52480	KPYM	KPYM	Pkm
A2AFG7	A2AFG7	L1CAM	L1cam
F6RJV6	F6RJV6	LANC2	Lancl2
A2A6G9	A2A6G9	LASP1	Lasp1
Q9Z127	LAT1	LAT1	Slc7a5
A0A1B0GSX0	A0A1B0GSX0	LDHA	Ldha
A0A6I8MX27	A0A6I8MX27	LDHB	Ldhb
Q9Z2I0	LETM1	LETM1	Letm1
A0A0G2JGB7	A0A0G2JGB7	LGI1	Lgi1
A9DA50	A9DA50	LIGO1	Lingo1
B8QI34	B8QI34	LIPA2	Ppfia2
P60469	LIPA3	LIPA3	Ppfia3
Q9DC07	LNEBL	LNEBL	Nebl
Q8CGK3	LONM	LONM	Lonp1
Q6PB66	LPPRC	LPPRC	Lrpprc
A0A0R4J0I9	A0A0R4J0I9	LRP1	Lrp1
A0A0G2JDT9	A0A0G2JDT9	LRRC7	Lrrc7
A0A087WP80	A0A087WP80	LSAMP	Lsamp
Q924L1	LTMD1	LTMD1	Letmd1
P70202	LXN	LXN	Lxn
Q8K356	Q8K356	LY6H	Ly6h
Q9CR62	M2OM	M2OM	Slc25a11
Q922B1	MACD1	MACD1	Macrod1
A0A0A0MQA6	A0A0A0MQA6	MACF1	Macf1
Q3ZB60	Q3ZB60	MAG	Mag
Q8BI08	MAL2	MAL2	Mal2
Q99KE1	MAOM	MAOM	Me2
Q8BMF3	MAON	MAON	Me3
A2ARP8	A2ARP8	MAP1A	Map1a
P14873	MAP1B	MAP1B	Map1b
A0A0G2JDN7	A0A0G2JDN7	MAP4	Map4
Q7TSJ2	MAP6	MAP6	Map6
Q922Q1	MARC2	MARC2	Mtarc2
P26645	MARCS	MARCS	Marcks
Q6PER3	MARE3	MARE3	Mapre3
A0A498WGS3	A0A498WGS3	MBP	Mbp
Q99MR8	MCCA	MCCA	Mccc1
Q3ULD5	MCCB	MCCB	Mccc2
Q3UMR5	MCU	MCU	Mcu
A0A5F8MPN8	A0A5F8MPN8	MDHC	Mdh1
P08249	MDHM	MDHM	Mdh2
Q9DCS3	MECR	MECR	Mecr
Q80U63	MFN2	MFN2	Mfn2
Q9CPU4	MGST3	MGST3	Mgst3
D3Z0L4	D3Z0L4	MIC19	Chchd3
E9Q4M4	E9Q4M4	MIC25	Chchd6
Q9DCZ4	MIC26	MIC26	Apoo
Q8CAQ8	MIC60	MIC60	Immt
Q9CTY5	MICU3	MICU3	Micu3
G3X9G2	G3X9G2	MINK1	Mink1
Q8BG51	MIRO1	MIRO1	Rhot1
Q9CXJ4	MITOS	MITOS	Abcb8
Q9EQ20	MMSA	MMSA	Aldh6a1
Q3UY21	Q3UY21	MOG	Mog
P53986	MOT1	MOT1	Slc16a1
P31938	MP2K1	MP2K1	Map2k1
D3Z786	D3Z786	MPC1	Mpc1
G5E902	G5E902	MPCP	Slc25a3
Q9WV34	MPP2	MPP2	Mpp2
G3UZJ2	G3UZJ2	MTAP2	Map2
A0A3Q4EBT8	A0A3Q4EBT8	MTCH1	Mtch1
Q791V5	MTCH2	MTCH2	Mtch2
O88441	MTX2	MTX2	Mtx2
P16332	MUTA	MUTA	Mmut
B2RRE2	B2RRE2	MY18A	Myo18a
Q5SV64	Q5SV64	MYH10	Myh10
A0A1W2P6F6	A0A1W2P6F6	MYL6	Myl6
D3YZ62	D3YZ62	MYO5A	Myo5a
E9PVU0	E9PVU0	MYO6	Myo6
P60202	MYPR	MYPR	Plp1
Q8K596	NAC2	NAC2	Slc8a2
A0A7N9VS49	A0A7N9VS49	NAKD2	Nadk2
Q9DB73	NB5R1	NB5R1	Cyb5r1
F2Z456	F2Z456	NB5R3	Cyb5r3
P13595	NCAM1	NCAM1	Ncam1
O35136	NCAM2	NCAM2	Ncam2
Q9Z0E0	NCDN	NCDN	Ncdn
Q8BLF1	NCEH1	NCEH1	Nceh1
A2AS98	A2AS98	NCKP1	Nckap1
Q05DV1	Q05DV1	NCPR	Por
E9PZF0	E9PZF0	NDKA	Nme1
Q62433	NDRG1	NDRG1	Ndrg1
Q9QYG0	NDRG2	NDRG2	Ndrg2
Q8VCV2	Q8VCV2	NDRG3	Ndrg3
Q9CQ75	NDUA2	NDUA2	Ndufa2
A0A0N4SVQ1	A0A0N4SVQ1	NDUA4	Ndufa4
Q9CPP6	NDUA5	NDUA5	Ndufa5
Q9CQZ5	NDUA6	NDUA6	Ndufa6
Q9Z1P6	NDUA7	NDUA7	Ndufa7
Q9DCJ5	NDUA8	NDUA8	Ndufa8
A0A0R3P9C8	A0A0R3P9C8	NDUA9	Ndufa9
Q99LC3	NDUAA	NDUAA	Ndufa10
G5E814	G5E814	NDUAB	Ndufa11
Q7TMF3	NDUAC	NDUAC	Ndufa12
Q9ERS2	NDUAD	NDUAD	Ndufa13
Q9CQC7	NDUB4	NDUB4	Ndufb4
D3Z568	D3Z568	NDUB5	Ndufb5
Q9CR61	NDUB7	NDUB7	Ndufb7
Q9D6J5	NDUB8	NDUB8	Ndufb8
Q9CQJ8	NDUB9	NDUB9	Ndufb9
Q9DCS9	NDUBA	NDUBA	Ndufb10
Q9CQ54	NDUC2	NDUC2	Ndufc2
A2APY7	NDUF5	NDUF5	Ndufaf5
Q91VD9	NDUS1	NDUS1	Ndufs1
Q91WD5	NDUS2	NDUS2	Ndufs2
Q9DCT2	NDUS3	NDUS3	Ndufs3
E9QPX3	E9QPX3	NDUS4	Ndufs4
B1ARW4	B1ARW4	NDUS5	Ndufs5
A0A1Y7VM38	A0A1Y7VM38	NDUS6	Ndufs6
Q9DC70	NDUS7	NDUS7	Ndufs7
D3YUM1	D3YUM1	NDUV1	Ndufv1
Q9D6J6	NDUV2	NDUV2	Ndufv2
Q9CR95	NECP1	NECP1	Necap1
A0A4W9	A0A4W9	NEGR1	Negr1
P06837	NEUM	NEUM	Gap43
Q04690	NF1	NF1	Nf1
Q810U3	NFASC	NFASC	Nfasc
P19246	NFH	NFH	Nefh
P08551	NFL	NFL	Nefl
A0A0R4J036	A0A0R4J036	NFM	Nefm
Q9Z1J3	NFS1	NFS1	Nfs1
A0A0N4SUH8	A0A0N4SUH8	NFU1	Nfu1
P70441	NHRF1	NHRF1	Slc9a3r1
O55125	NIPS1	NIPS1	Nipsnap1
Q7TMG8	Q7TMG8	NIPS2	Nipsnap2
G3X9V4	G3X9V4	NMDE2	Grin2b
A2AI14	A2AI14	NMDZ1	Grin1
J3QMM7	J3QMM7	NNRD	Naxd
E9Q8F4	E9Q8F4	NNTM	Nnt
A3KGE4	A3KGE4	NOE1	Olfm1
Q9CQE1	NPS3B	NPS3B	Nipsnap3b
P97300	NPTN	NPTN	Nptn
Q62443	NPTX1	NPTX1	Nptx1
E9PZM8	E9PZM8	NPTXR	Nptxr
E0CY11	E0CY11	NRX1A	Nrxn1
P46460	NSF	NSF	Nsf
Q3UHB1	NT5D3	NT5D3	Nt5dc3
D3Z396	D3Z396	NTRI	Ntm
P03921	NU5M	NU5M	Mtnd5
Q9D8W7	OCAD2	OCAD2	Ociad2
P53395	ODB2	ODB2	Dbt
Q60597	ODO1	ODO1	Ogdh
Q9D2G2	ODO2	ODO2	Dlst
Q8BMF4	ODP2	ODP2	Dlat
P35486	ODPA	ODPA	Pdha1
Q9D051	ODPB	ODPB	Pdhb
Q8BKZ9	ODPX	ODPX	Pdhx
Q8CGY8	OGT1	OGT1	Ogt
G3XA53	G3XA53	OMGP	Omg
P58281	OPA1	OPA1	Opa1
D3YWF6	D3YWF6	OTUB1	Otub1
Q4KMM3	OXR1	OXR1	Oxr1
Q922Q4	P5CR2	P5CR2	Pycr2
Q9Z110	P5CS	P5CS	Aldh18a1
Q61644	PACN1	PACN1	Pacsin1
Q8K212	PACS1	PACS1	Pacs1
G5E884	G5E884	PAK1	Pak1
Q9Z0P4	PALM	PALM	Palm
Q9JLB0	PALS2	PALS2	Pals2
A2A815	A2A815	PARK7	Park7
P60335	PCBP1	PCBP1	Pcbp1
Q91ZA3	PCCA	PCCA	Pcca
Q99MN9	PCCB	PCCB	Pccb
A0A0R4J0G0	A0A0R4J0G0	PCKGM	Pck2
Q9QYX7	PCLO	PCLO	Pclo
Q9QXV0	PCS1N	PCS1N	Pcsk1n
A0A1B0GRJ9	A0A1B0GRJ9	PDE2A	Pde2a
P09103	PDIA1	PDIA1	P4hb
P27773	PDIA3	PDIA3	Pdia3
A0A0R4J0Z1	A0A0R4J0Z1	PDIA4	Pdia4
Q3TML0	Q3TML0	PDIA6	Pdia6
Q8BFP9	PDK1	PDK1	Pdk1
Q922H2	PDK3	PDK3	Pdk3
A2AJP9	A2AJP9	PDP1	Pdp1
Q8K183	PDXK	PDXK	Pdxk
Q62048	PEA15	PEA15	Pea15
P70296	PEBP1	PEBP1	Pebp1
P12382	PFKAL	PFKAL	Pfkl
P47857	PFKAM	PFKAM	Pfkm
Q8C605	Q8C605	PFKAP	Pfkp
Q9DBJ1	PGAM1	PGAM1	Pgam1
P09411	PGK1	PGK1	Pgk1
A2CEK3	A2CEK3	PGM1	Pgm1
P67778	PHB1	PHB1	Phb1
O35129	PHB2	PHB2	Phb2
Q80TL4	PHF24	PHF24	Phf24
Q8BGT8	PHIPL	PHIPL	Phyhipl
Q8K0S0	PHYIP	PHYIP	Phyhip
A0A140T8I9	A0A140T8I9	PI4KA	Pi4ka
F8WHW6	F8WHW6	PI51C	Pip5k1c
Q7M6Y3	PICAL	PICAL	Picalm
E0CYV0	E0CYV0	PIMT	Pcmt1
Q9Z1B3	PLCB1	PLCB1	Plcb1
Q9QXS1	PLEC	PLEC	Plec
P60487	PLPP	PLPP	Pdxp
Q99JY8	PLPP3	PLPP3	Plpp3
A0A0G2JGY9	A0A0G2JGY9	PLPR4	Plppr4
P62137	PP1A	PP1A	Ppp1ca
P63328	PP2BA	PP2BA	Ppp3ca
P17742	PPIA	PPIA	Ppia
P24369	PPIB	PPIB	Ppib
Q9CR16	PPID	PPID	Ppid
F7BX26	F7BX26	PPP5	Ppp5c
P35700	PRDX1	PRDX1	Prdx1
Q61171	PRDX2	PRDX2	Prdx2
P20108	PRDX3	PRDX3	Prdx3
P99029	PRDX5	PRDX5	Prdx5
O08709	PRDX6	PRDX6	Prdx6
Q9WU79	PROD	PROD	Prodh
P62962	PROF1	PROF1	Pfn1
D3YWS3	D3YWS3	PROF2	Pfn2
E9PUL5	PRRT2	PRRT2	Prrt2
P32848	PRVA	PRVA	Pvalb
Q11011	PSA	PSA	Npepps
A0A0G2JF97	A0A0G2JF97	PSA5	Psma5
E0CXB1	E0CXB1	PSA6	Psma6
O55234	PSB5	PSB5	Psmb5
Q8VDM4	PSMD2	PSMD2	Psmd2
P14685	PSMD3	PSMD3	Psmd3
Q8BGC4	PTGR3	PTGR3	Ptgr3
P80560	PTPR2	PTPR2	Ptprn2
P18052	PTPRA	PTPRA	Ptpra
B2RXS8	B2RXS8	PTPRZ	Ptprz1
Q3U125	Q3U125	PXL2A	Prxl2a
Q9DB60	PXL2B	PXL2B	Prxl2b
G5E8R3	G5E8R3	PYC	Pcx
Q8CI94	PYGB	PYGB	Pygb
E9PUM3	E9PUM3	PYGM	Pygm
Q68FG2	Q68FG2	Q68FG2	Sptbn2
Q91VA7	Q91VA7	Q91VA7	Idh3b
Q9Z1R9	Q9Z1R9	Q9Z1R9	Prss1
Q9CZ13	QCR1	QCR1	Uqcrc1
Q9CPX8	QCR10	QCR10	Uqcr11
Q9DB77	QCR2	QCR2	Uqcrc2
P99028	QCR6	QCR6	Uqcrh
Q9CQB4	Q9CQB4	QCR7	Uqcrb
Q9CQ69	QCR8	QCR8	Uqcrq
Q3UNZ8	QORL2	QORL2	Cryzl2
P61027	RAB10	RAB10	Rab10
Q91V41	RAB14	RAB14	Rab14
P62821	RAB1A	RAB1A	Rab1A
A0A494B945	A0A494B945	RAB1B	Rab1b
P35282	RAB21	RAB21	Rab21
P53994	RAB2A	RAB2A	Rab2a
Q6PHN9	RAB35	RAB35	Rab35
P63011	RAB3A	RAB3A	Rab3a
A0A286YDR2	A0A286YDR2	RAB3C	Rab3c
P61021	RAB5B	RAB5B	Rab5b
Q8C266	Q8C266	RAB5C	Rab5c
P35279	RAB6A	RAB6A	Rab6a
P51150	RAB7A	RAB7A	Rab7a
P61028	RAB8B	RAB8B	Rab8b
Q3TLP8	Q3TLP8	RAC1	Rac1
A0A5F8MPB9	A0A5F8MPB9	RADI	Rdx
P63321	RALA	RALA	Rala
P62827	RAN	RAN	Ran
A0A0G2JDL9	A0A0G2JDL9	RAP1A	Rap1a
G3UY29	G3UY29	RB11B	Rab11b
Q8BHC1	RB39B	RB39B	Rab39b
F8VPM7	F8VPM7	RB6I2	Erc1
Q9ERI6	RDH14	RDH14	Rdh14
G3X8R0	G3X8R0	REEP5	Reep5
A2AH25	A2AH25	RHG01	Arhgap1
A0A0A6YXF6	A0A0A6YXF6	RHOA	Rhoa
P62746	RHOB	RHOB	Rhob
P84096	RHOG	RHOG	Rhog
P52760	RIDA	RIDA	Rida
F6TZK4	F6TZK4	RIMS1	Rims1
A0A3B2WBL1	A0A3B2WBL1	RL10A	Rpl10a
P35979	RL12	RL12	Rpl12
A0A1B0GQU8	A0A1B0GQU8	RL18	Rpl18
P62751	RL23A	RL23A	Rpl23a
P27659	RL3	RL3	Rpl3
P62911	RL32	RL32	Rpl32
F6XI62	F6XI62	RL7	Rpl7
P62918	RL8	RL8	Rpl8
P14869	RLA0	RLA0	Rplp0
Q9DB15	RM12	RM12	Mrpl12
A0A1Y7VMN0	A0A1Y7VMN0	ROCK2	Rock2
P47708	RP3A	RP3A	Rph3a
Q9EQZ6	RPGF4	RPGF4	Rapgef4
Q91YQ5	RPN1	RPN1	Rpn1
A0A1W2P7A1	A0A1W2P7A1	RS12	Rps12
Q8BK72	RT27	RT27	Mrps27
Q8K0T0	RTN1	RTN1	Rtn1
Q9ES97	RTN3	RTN3	Rtn3
Q99P72	RTN4	RTN4	Rtn4
A0A076FR46	A0A076FR46	S12A5	Slc12a5
Q8BH59	S2512	S2512	Slc25a12
Q8BGP6	S2540	S2540	Slc25a40
A0A0A6YWF5	A0A0A6YWF5	S38A3	Slc38a3
Q5FWH7	S39AC	S39AC	Slc39a12
Q5DTL9	S4A10	S4A10	Slc4a10
E9Q8N8	E9Q8N8	S4A4	Slc4a4
P31650	S6A11	S6A11	Slc6a11
A0A0R4J087	A0A0R4J087	S6A17	Slc6a17
A0A5F8MPK9	A0A5F8MPK9	SAC1	Sacm1l
Q80SW1	SAHH2	SAHH2	Ahcyl1
F8WGT1	F8WGT1	SAHH3	Ahcyl2
Q8BGH2	SAM50	SAM50	Samm50
J3QPG5	J3QPG5	SAP	Psap
O35874	SATT	SATT	Slc1a4
P31648	SC6A1	SC6A1	Slc6a1
B2RQX9	B2RQX9	SC6A5	Slc6a5
Q8C8N2	SCAI	SCAI	Scai
Q3TSA8	Q3TSA8	SCAM1	Scamp1
Q9JKD3	SCAM5	SCAM5	Scamp5
A2ASZ8	SCMC2	SCMC2	Slc25a25
Q6GQS1	SCMC3	SCMC3	Slc25a23
P97952	SCN1B	SCN1B	Scn1b
A0A5H1ZRM8	A0A5H1ZRM8	SCN2A	Scn2a
Q3UJQ9	Q3UJQ9	SCOT1	Oxct1
P32020	SCP2	SCP2	Scp2
Q8R127	SCPDL	SCPDL	Sccpdh
O35114	SCRB2	SCRB2	Scarb2
Q9CZC8	SCRN1	SCRN1	Scrn1
Q8K2B3	SDHA	SDHA	Sdha
Q9CQA3	SDHB	SDHB	Sdhb
A0A0J9YTY0	A0A0J9YTY0	SEPT11	Septin11
D3YYB1	D3YYB1	SEPT2	Septin2
A0A2R8W6V9	A0A2R8W6V9	SEPT3	Septin3
A0A338P6R8	A0A338P6R8	SEPT5	Septin5
E9Q1G8	E9Q1G8	SEPT7	Septin7
B1AQY9	B1AQY9	SEPT8	Septin8
A2A6U3	A2A6U3	SEPT9	Septin9
Q61753	SERA	SERA	Phgdh
Q99K85	SERC	SERC	Psat1
Q99JR1	SFXN1	SFXN1	Sfxn1
Q3U4F0	Q3U4F0	SFXN3	Sfxn3
Q8BRQ9	Q8BRQ9	SFXN5	Sfxn5
F7CPX0	F7CPX0	SGIP1	Sgip1
A2ALV3	A2ALV3	SH3G2	Sh3gl2
D3YZU1	SHAN1	SHAN1	Shank1
D3Z5K8	D3Z5K8	SHAN2	Shank2
Q4ACU6	SHAN3	SHAN3	Shank3
A2AWI7	A2AWI7	SHLB2	Sh3glb2
P97797	SHPS1	SHPS1	Sirpa
Q8C3Q5	SHSA7	SHSA7	Shisa7
Q8VDQ8	SIR2	SIR2	Sirt2
Q9WTX5	SKP1	SKP1	Skp1
A2AQ25	SKT	SKT	Skt
Q9DB05	SNAA	SNAA	Napa
P28663	SNAB	SNAB	Napb
D3Z4B2	D3Z4B2	SNAG	Napg
O55100	SNG1	SNG1	Syngr1
Q8R191	SNG3	SNG3	Syngr3
P60879	SNP25	SNP25	Snap25
B2FDF6	B2FDF6	SNP47	Snap47
Q80U23	SNPH	SNPH	Snph
P08228	SODC	SODC	Sod1
P09671	SODM	SODM	Sod2
Q6NZL0	SOGA3	SOGA3	Soga3
G3UXX3	G3UXX3	SPRE	Spr
E9Q397	E9Q397	SPTB1	Sptb
Q62261	SPTB2	SPTB2	Sptbn1
A3KGU7	A3KGU7	SPTN1	Sptan1
A0A0R4J1T1	A0A0R4J1T1	SRBS2	Sorbs2
P05480	SRC	SRC	Src
Q921L6	Q921L6	SRC8	Cttn
A0A571BDG0	A0A571BDG0	SRCN1	Srcin1
F8VPQ4	F8VPQ4	SRGP3	Srgap3
Q8BWF0	SSDH	SSDH	Aldh5a1
Q3UGN9	Q3UGN9	STAM1	Stam
Q5DQR4	STB5L	STB5L	Stxbp5l
Q60864	STIP1	STIP1	Stip1
Q99JB2	STML2	STML2	Stoml2
D3Z1Z8	D3Z1Z8	STMN1	Stmn1
A0A1B0GS08	A0A1B0GS08	STUM	Stum
O35526	STX1A	STX1A	Stx1a
P61264	STX1B	STX1B	Stx1b
O08599	STXB1	STXB1	Stxbp1
Q9WUM5	SUCA	SUCA	Suclg1
Q9Z2I9	SUCB1	SUCB1	Sucla2
Q9Z2I8	SUCB2	SUCB2	Suclg2
Q9JIS5	SV2A	SV2A	Sv2a
Q8BG39	SV2B	SV2B	Sv2b
A0A0A6YVS6	A0A0A6YVS6	SYGP1	Syngap1
Q8BIJ6	SYIM	SYIM	Iars2
E9PVN6	E9PVN6	SYJ2B	Synj2bp
O88935	SYN1	SYN1	Syn1
Q64332	SYN2	SYN2	Syn2
D3Z656	D3Z656	SYNJ1	Synj1
Q8CC35	SYNPO	SYNPO	Synpo
Q62277	SYPH	SYPH	Syp
P46096	SYT1	SYT1	Syt1
Q920N7	SYT12	SYT12	Syt12
A0A0R4J2C2	A0A0R4J2C2	SYT2	Syt2
A0A286YCR9	A0A286YCR9	SYT7	Syt7
O55042	SYUA	SYUA	Snca
Q91ZZ3	SYUB	SYUB	Sncb
Q9R1Q8	TAGL3	TAGL3	Tagln3
B1AQW2	B1AQW2	TAU	Mapt
P68369	TBA1A	TBA1A	Tuba1a
A0A0A0MQA5	A0A0A0MQA5	TBA4A	Tuba4a
Q7TMM9	TBB2A	TBB2A	Tubb2a
Q9ERD7	TBB3	TBB3	Tubb3
Q9D6F9	TBB4A	TBB4A	Tubb4a
P68372	TBB4B	TBB4B	Tubb4b
P99024	TBB5	TBB5	Tubb5
P11983	TCPA	TCPA	Tcp1
P80314	TCPB	TCPB	Cct2
G5E839	G5E839	TCPD	Cct4
P80316	TCPE	TCPE	Cct5
E9Q133	E9Q133	TCPG	Cct3
A0A0N4SV00	A0A0N4SV00	TCPH	Cct7
P42932	TCPQ	TCPQ	Cct8
Q52KG9	Q52KG9	TCPZ	Cct6a
A0A0G2JE08	A0A0G2JE08	TDRKH	Tdrkh
Q8BYI9	TENR	TENR	Tnr
Q01853	TERA	TERA	Vcp
Q3UUI3	THEM4	THEM4	Them4
Q8QZT1	THIL	THIL	Acat1
Q8BWT1	THIM	THIM	Acaa2
P10639	THIO	THIO	Txn
Q99J99	THTM	THTM	Mpst
P52196	THTR	THTR	Tst
A0A1L1SUX8	A0A1L1SUX8	THY1	Thy1
P62073	TIM10	TIM10	Timm10
A0A1W2P756	A0A1W2P756	TIM13	Timm13
O35857	TIM44	TIM44	Timm44
Q9D880	TIM50	TIM50	Timm50
P62077	TIM8B	TIM8B	Timm8b
Q9WV98	TIM9	TIM9	Timm9
P40142	TKT	TKT	Tkt
D3YXS8	D3YXS8	TM40L	Tomm40l
Q8BK08	TMM11	TMM11	Tmem11
Q4VAE3	TMM65	TMM65	Tmem65
A0A1L1SU70	A0A1L1SU70	TMOD2	Tmod2
D3Z2J6	D3Z2J6	TMX2	Tmx2
Q8C5G6	Q8C5G6	TOLIP	Tollip
Q9CPQ3	TOM22	TOM22	Tomm22
Q9CZW5	TOM70	TOM70	Tomm70
A2AUD5	A2AUD5	TPD54	Tpd52l2
P17751	TPIS	TPIS	Tpi1
E9Q455	E9Q455	TPM1	Tpm1
D3Z6I8	D3Z6I8	TPM3	Tpm3
O89023	TPP1	TPP1	Tpp1
Q7TQD2	TPPP	TPPP	Tppp
Q9CRB6	TPPP3	TPPP3	Tppp3
Q9CQN1	TRAP1	TRAP1	Trap1
Q61187	TS101	TS101	Tsg101
A0A0G2JDX4	A0A0G2JDX4	TSN2	Tspan2
A0A0U1RPU8	A0A0U1RPU8	TTYH1	Ttyh1
Q8JZU2	TXTP	TXTP	Slc25a1
B7ZBY7	B7ZBY7	UB2V1	Ube2v1
Q02053	UBA1	UBA1	Uba1
P61089	UBE2N	UBE2N	Ube2n
Q3U4W8	Q3U4W8	UBP5	Usp5
Q9R0P9	UCHL1	UCHL1	Uchl1
Q9CR68	UCRI	UCRI	Uqcrfs1
P51863	VA0D1	VA0D1	Atp6v0d1
A0A0N4SUV3	A0A0N4SUV3	VAMP1	Vamp1
B0QZN5	B0QZN5	VAMP2	Vamp2
Q9WV55	VAPA	VAPA	Vapa
Q8BH80	Q8BH80	VAPB	Vapb
Q62465	VAT1	VAT1	Vat1
P50516	VATA	VATA	Atp6v1a
P62814	VATB2	VATB2	Atp6v1b2
Q9Z1G3	VATC1	VATC1	Atp6v1c1
P57746	VATD	VATD	Atp6v1d
P50518	VATE1	VATE1	Atp6v1e1
Q9D1K2	VATF	VATF	Atp6v1f
Q9CR51	VATG1	VATG1	Atp6v1g1
Q9WTT4	VATG2	VATG2	Atp6v1g2
A0A0A6YWP6	A0A0A6YWP6	VATH	Atp6v1h
Q3UPN1	Q3UPN1	VCAM1	Vcam1
Q60932	VDAC1	VDAC1	Vdac1
G3UX26	G3UX26	VDAC2	Vdac2
J3QMG3	J3QMG3	VDAC3	Vdac3
A0A1B0GRU0	A0A1B0GRU0	VGLU1	Slc17a7
O35633	VIAAT	VIAAT	Slc32a1
P20152	VIME	VIME	Vim
P62761	VISL1	VISL1	Vsnl1
Q8C0E2	VP26B	VP26B	Vps26b
K3W4T3	K3W4T3	VPP1	Atp6v0a1
D3YW98	D3YW98	VPS29	Vps29
Q9EQH3	VPS35	VPS35	Vps35
O88342	WDR1	WDR1	Wdr1
Q8CBE3	WDR37	WDR37	Wdr37
Q920I9	WDR7	WDR7	Wdr7

## Sheet: PPT1 KO - 7M
PPT1 KO 7 Month Lipofuscin Proteome (n = 916)
UniProt Accession	SWISSPROT Accession	UniProt ID	Gene Name
Q9CQV8	1433B	1433B	Ywhab
P62259	1433E	1433E	Ywhae
P68510	1433F	1433F	Ywhah
P61982	1433G	1433G	Ywhag
P68254	1433T	1433T	Ywhaq
P63101	1433Z	1433Z	Ywhaz
Q76MZ3	2AAA	2AAA	Ppp2r1a
Q99L13	3HIDH	3HIDH	Hibadh
P10852	4F2	4F2	Slc3a2
A0A0A6YW67	A0A0A6YW67	A0A0A6YW67	Gm8797
A2ALL9	A2ALL9	A2ALL9	Atp2b3
Q3UHJ0	AAK1	AAK1	Aak1
P05201	AATC	AATC	Got1
P05202	AATM	AATM	Got2
Q61102	ABCB7	ABCB7	Abcb7
A0A0G2JDI9	A0A0G2JDI9	ABCD3	Abcd3
Q6PE15	ABHDA	ABHDA	Abhd10
Q8K4G5	ABLM1	ABLM1	Ablim1
Q8BL65	ABLM2	ABLM2	Ablim2
A0A0R4J0P1	A0A0R4J0P1	ACAD8	Acad8
Q8JZN5	ACAD9	ACAD9	Acad9
A0A0R4J083	A0A0R4J083	ACADL	Acadl
P45952	ACADM	ACADM	Acadm
Q07417	ACADS	ACADS	Acads
P50544	ACADV	ACADV	Acadvl
Q99PU5	ACBG1	ACBG1	Acsbg1
E9Q5L3	E9Q5L3	ACDSB	Acadsb
Q3V117	Q3V117	ACLY	Acly
Q9CQR4	ACO13	ACO13	Acot13
Q99KI0	ACON	ACON	Aco2
Q9QYR9	ACOT2	ACOT2	Acot2
Q9R0X4	ACOT9	ACOT9	Acot9
F6ZFT1	F6ZFT1	ACPM	Ndufab1
Q8VCW8	ACSF2	ACSF2	Acsf2
A0A1D5RMC8	A0A1D5RMC8	ACSF3	Acsf3
D3Z041	D3Z041	ACSL1	Acsl1
Q5ICG5	Q5ICG5	ACSL6	Acsl6
P60710	ACTB	ACTB	Actb
P63260	ACTG	ACTG	Actg1
A1BN54	A1BN54	ACTN1	Actn1
A0A494BB86	A0A494BB86	ACTZ	Actr1a
D3YUP9	D3YUP9	ADA22	Adam22
Q9QYC0	ADDA	ADDA	Add1
Q9QYB8	ADDB	ADDB	Add2
Q9QYB5	ADDG	ADDG	Add3
Q61578	ADRO	ADRO	Fdxr
P48962	ADT1	ADT1	Slc25a4
P51881	ADT2	ADT2	Slc25a5
Q8JZQ2	AFG32	AFG32	Afg3l2
Q9ESW4	AGK	AGK	Agk
H7BX15	H7BX15	AGRL1	Adgrl1
B1AU25	B1AU25	AIFM1	Aifm1
P46660	AINX	AINX	Ina
Q9JII6	AK1A1	AK1A1	Akr1a1
P24549	AL1A1	AL1A1	Aldh1a1
Q9CZS1	AL1B1	AL1B1	Aldh1b1
Q8R0Y6	AL1L1	AL1L1	Aldh1l1
B1ATI0	B1ATI0	AL3A2	Aldh3a2
Q8CHT0	AL4A1	AL4A1	Aldh4a1
Q9DBF1	AL7A1	AL7A1	Aldh7a1
Q9JLJ2	AL9A1	AL9A1	Aldh9a1
P47738	ALDH2	ALDH2	Aldh2
P05064	ALDOA	ALDOA	Aldoa
P05063	ALDOC	ALDOC	Aldoc
P45376	ALDR	ALDR	Akr1b1
A0A0G2JEG8	A0A0G2JEG8	AMPH	Amph
Q9CPY7	AMPL	AMPL	Lap3
S4R2F3	S4R2F3	ANK2	Ank2
S4R2K9	S4R2K9	ANK3	Ank3
P48036	ANXA5	ANXA5	Anxa5
F8WIT2	F8WIT2	ANXA6	Anxa6
Q64133	AOFA	AOFA	Maoa
Q8BW75	AOFB	AOFB	Maob
Q61548	AP180	AP180	Snap91
O35643	AP1B1	AP1B1	Ap1b1
P17426	AP2A1	AP2A1	Ap2a1
P17427	AP2A2	AP2A2	Ap2a2
Q9DBG3	AP2B1	AP2B1	Ap2b1
Q3TWV4	Q3TWV4	AP2M1	Ap2m1
A0A571BES1	A0A571BES1	AP3B2	Ap3b2
O54774	AP3D1	AP3D1	Ap3d1
P08226	APOE	APOE	Apoe
A0A5F8MQ17	A0A5F8MQ17	AQP4	Aqp4
Q7TS64	Q7TS64	ARBK1	Grk2
Q9R0Q6	ARC1A	ARC1A	Arpc1a
P61205	ARF3	ARF3	Arf3
P61750	ARF4	ARF4	Arf4
P62331	ARF6	ARF6	Arf6
Q3TGS9	Q3TGS9	ARFG1	Arfgap1
Q9CQW2	ARL8B	ARL8B	Arl8b
Q9D0L7	ARM10	ARM10	Armc10
P61161	ARP2	ARP2	Actr2
A0A087WQ14	A0A087WQ14	ARP3	Actr3
Q9D898	ARP5L	ARP5L	Arpc5l
D3YXG6	D3YXG6	ARPC2	Arpc2
H7BWZ3	H7BWZ3	ARPC3	Arpc3
P59999	ARPC4	ARPC4	Arpc4
Q3UA72	Q3UA72	ARPC5	Arpc5
Q9WV54	ASAH1	ASAH1	Asah1
Q8C0M9	ASGL1	ASGL1	Asrgl1
Q8VDN2	AT1A1	AT1A1	Atp1a1
Q6PIE5	AT1A2	AT1A2	Atp1a2
A0A0G2JGX4	A0A0G2JGX4	AT1A3	Atp1a3
P14094	AT1B1	AT1B1	Atp1b1
P14231	AT1B2	AT1B2	Atp1b2
P97370	AT1B3	AT1B3	Atp1b3
O55143	AT2A2	AT2A2	Atp2a2
G5E829	AT2B1	AT2B1	Atp2b1
Q3UHH0	Q3UHH0	AT2B2	Atp2b2
E9Q828	E9Q828	AT2B4	Atp2b4
Q9CQQ7	AT5F1	AT5F1	Atp5pb
A0A0M3HEP7	A0A0M3HEP7	AT8A1	Atp8a1
Q925I1	ATAD3	ATAD3	Atad3
E9PV44	E9PV44	ATIF1	Atpif1
Q8BH66	ATLA1	ATLA1	Atl1
P56382	ATP5E	ATP5E	Atp5f1e
B1ASE2	B1ASE2	ATP5H	Atp5h
Q06185	ATP5I	ATP5I	Atp5me
P97450	ATP5J	ATP5J	Atp5pf
Q9CRA7	ATP5S	ATP5S	Dmac2l
P03930	ATP8	ATP8	Mtatp8
Q03265	ATPA	ATPA	Atp5f1a
P56480	ATPB	ATPB	Atp5f1b
Q9D3D9	ATPD	ATPD	Atp5f1d
Q8C2Q8	Q8C2Q8	ATPG	Atp5c1
P56135	ATPK	ATPK	Atp5mf
Q78IK2	ATPMK	ATPMK	Atp5mk
Q9DB20	ATPO	ATPO	Atp5po
A0A0R4J023	A0A0R4J023	AUHM	Auh
Q80TZ3	AUXI	AUXI	Dnajc6
B2RXT3	B2RXT3	B2RXT3	Ogdhl
P04919	B3AT	B3AT	Slc4a1
E9PYH2	E9PYH2	BACH	Acot7
B1AZ46	B1AZ46	BAIP2	Baiap2
P18572	BASI	BASI	Bsg
Q91XV3	BASP1	BASP1	Basp1
F7BNZ5	F7BNZ5	BCAS1	Bcas1
Q9CZP5	BCS1	BCS1	Bcs1l
Q80XN0	BDH	BDH	Bdh1
O08539	BIN1	BIN1	Bin1
P20029	BIP	BIP	Hspa5
Q8R164	BPHL	BPHL	Bphl
A0A1B0GRV0	A0A1B0GRV0	BPNT1	Bpnt1
O88737	BSN	BSN	Bsn
P14106	C1QB	C1QB	C1qb
Q8R5L1	Q8R5L1	C1QBP	C1qbp
Q02105	C1QC	C1QC	C1qc
A0A1W2P733	A0A1W2P733	C1TC	Mthfd1
Q3V3R1	C1TM	C1TM	Mthfd1l
E9Q1X8	E9Q1X8	CA2D1	Cacna2d1
B7ZDD7	B7ZDD7	CACP	Crat
Q9WTR5	CAD13	CAD13	Cdh13
D3YYT0	D3YYT0	CADH2	Cdh2
A0A668KLV1	A0A668KLV1	CADM1	Cadm1
G3UZM4	G3UZM4	CADM2	Cadm2
K4DI58	K4DI58	CADM3	Cadm3
Q8R464	CADM4	CADM4	Cadm4
P00920	CAH2	CAH2	Ca2
Q8CCS7	Q8CCS7	CALB2	Calb2
P0DP26	CALM1	CALM1	Calm1
P14211	CALR	CALR	Calr
P35564	CALX	CALX	Canx
A0A0A6YW88	A0A0A6YW88	CAMKV	Camkv
O08529	CAN2	CAN2	Capn2
Q63810	CANB1	CANB1	Ppp3r1
Q6ZQ38	CAND1	CAND1	Cand1
P40124	CAP1	CAP1	Cap1
J3QJW3	J3QJW3	CAPS1	Cadps
P47757	CAPZB	CAPZB	Capzb
P10605	CATB	CATB	Ctsb
F8WIR1	F8WIR1	CATD	Ctsd
Q9R013	CATF	CATF	Ctsf
P47754	CAZA2	CAZA2	Capza2
Q00493	CBPE	CBPE	Cpe
P48758	CBR1	CBR1	Cbr1
Q91VT4	CBR4	CBR4	Cbr4
D3YVV1	D3YVV1	CC50A	Tmem30a
S4R2F1	S4R2F1	CCG8	Cacng8
E9Q3Q6	E9Q3Q6	CD166	Alcam
A0A2R8VI30	A0A2R8VI30	CD47	Cd47
P35762	CD81	CD81	Cd81
P60766	CDC42	CDC42	Cdc42
A2AMQ5	A2AMQ5	CDS2	Cds2
Q9JKC6	CEND	CEND	Cend1
Q64433	CH10	CH10	Hspe1
P63038	CH60	CH60	Hspd1
Q9D1L0	CHCH2	CHCH2	Chchd2
Q91WS0	CISD1	CISD1	Cisd1
Q9CZU6	CISY	CISY	Cs
F7DCH5	F7DCH5	CLAP2	Clasp2
Q6IRU5	CLCB	CLCB	Cltb
Q60771	CLD11	CLD11	Cldn11
Q5SXR6	Q5SXR6	CLH1	Cltc
Q9QYB1	CLIC4	CLIC4	Clic4
Q06890	CLUS	CLUS	Clu
Q8R4N0	CLYBL	CLYBL	Clybl
Q3U5Q7	CMPK2	CMPK2	Cmpk2
P16330	CN37	CN37	Cnp
O88507	CNTFR	CNTFR	Cntfr
P12960	CNTN1	CNTN1	Cntn1
O54991	CNTP1	CNTP1	Cntnap1
E9QNF7	E9QNF7	CNTP2	Cntnap2
F8WGL3	F8WGL3	COF1	Cfl1
P45591	COF2	COF2	Cfl2
Q8BMS4	COQ3	COQ3	Coq3
O89053	COR1A	COR1A	Coro1a
P00405	COX2	COX2	Mtco2
P00416	COX3	COX3	mt-Co3
P19783	COX41	COX41	Cox4i1
P12787	COX5A	COX5A	Cox5a
Q9D881	Q9D881	COX5B	Cox5b-ps
Q9CPQ1	COX6C	COX6C	Cox6c
Q9WVK8	CP46A	CP46A	Cyp46a1
P84086	CPLX2	CPLX2	Cplx2
Q3UYN2	Q3UYN2	CPNE6	Cpne6
P97742	CPT1A	CPT1A	Cpt1a
P52825	CPT2	CPT2	Cpt2
A0A1L1SRG5	A0A1L1SRG5	CRYAB	Cryab
Q60737	CSK21	CSK21	Csnk2a1
Q6P9K8	CSKI1	CSKI1	Caskin1
A0A067XG53	A0A067XG53	CSKP	Cask
G3XA35	G3XA35	CSPG2	Vcan
Q71M36	CSPG5	CSPG5	Cspg5
P97315	CSRP1	CSRP1	Csrp1
A0A0J9YU62	A0A0J9YU62	CTBP1	Ctbp1
E0CXB9	E0CXB9	CTNA2	Ctnna2
Q02248	CTNB1	CTNB1	Ctnnb1
B7ZNF6	B7ZNF6	CTND2	Ctnnd2
P56391	CX6B1	CX6B1	Cox6b1
P48771	CX7A2	CX7A2	Cox7a2
P23242	CXA1	CXA1	Gja1
Q9D0M3	CY1	CY1	Cyc1
P62897	CYC	CYC	Cycs
Q5SQX6	CYFP2	CYFP2	Cyfip2
A0A2I3BPH9	A0A2I3BPH9	CYRIB	Cyrib
Q5M8N4	D39U1	D39U1	Sdr39u1
Q8R1Q8	DC1L1	DC1L1	Dync1li1
P48318	DCE1	DCE1	Gad1
A0A0G2JGQ6	A0A0G2JGQ6	DCLK1	Dclk1
Q99KJ8	DCTN2	DCTN2	Dctn2
Q9CWS0	DDAH1	DDAH1	Ddah1
Q9CQ62	DECR	DECR	Decr1
Q9R0P5	DEST	DEST	Dstn
P51660	DHB4	DHB4	Hsd17b4
P50171	DHB8	DHB8	Hsd17b8
P26443	DHE3	DHE3	Glud1
A0A0G2JGJ1	A0A0G2JGJ1	DHPR	Qdpr
Q99L04	DHRS1	DHRS1	Dhrs1
A0A2I3BRG8	A0A2I3BRG8	DHRS4	Dhrs4
Q5U458	DJC11	DJC11	Dnajc11
O08749	DLDH	DLDH	Dld
D3Z3B8	D3Z3B8	DLG1	Dlg1
A0A338P6J0	A0A338P6J0	DLG2	Dlg2
A0A338P6E5	A0A338P6E5	DLG4	Dlg4
D3Z709	D3Z709	DLGP1	Dlgap1
Q0VF59	Q0VF59	DLGP2	Dlgap2
B1AZP2	DLGP4	DLGP4	Dlgap4
A2AVR9	A2AVR9	DLRB1	Dynlrb1
B0V2P5	B0V2P5	DMXL2	Dmxl2
Q9QYJ0	DNJA2	DNJA2	Dnaja2
Q99M87	DNJA3	DNJA3	Dnaja3
A2AUE1	A2AUE1	DNJC5	Dnajc5
Q8K1M6	DNM1L	DNM1L	Dnm1l
A0A5F8MPK1	A0A5F8MPK1	DPP10	Dpp10
Q5U4C2	Q5U4C2	DPP6	Dpp6
Q6P1J1	Q6P1J1	DPYL1	Crmp1
O08553	DPYL2	DPYL2	Dpysl2
A0A0R4J1N0	A0A0R4J1N0	DPYL4	Dpysl4
Q9EQF6	DPYL5	DPYL5	Dpysl5
Q9JHU4	DYHC1	DYHC1	Dync1h1
P63168	DYL1	DYL1	Dynll1
A0A0J9YUE9	A0A0J9YUE9	DYN1	Dnm1
E9QLL2	E9QLL2	DYN3	Dnm3
A2AUK5	A2AUK5	E41L1	Epb41l1
O70318	E41L2	E41L2	Epb41l2
D0VYV6	D0VYV6	E41L3	Epb41l3
P56564	EAA1	EAA1	Slc1a3
P43006	EAA2	EAA2	Slc1a2
F7B227	F7B227	ECH1	Ech1
Q8BMS1	ECHA	ECHA	Hadha
Q99JY0	ECHB	ECHB	Hadhb
Q8BH95	ECHM	ECHM	Echs1
A0A3Q4EC00	A0A3Q4EC00	ECI1	Eci1
P10126	EF1A1	EF1A1	Eef1a1
P62631	EF1A2	EF1A2	Eef1a2
A0A0R4J1E2	A0A0R4J1E2	EF1D	Eef1d
P58252	EF2	EF2	Eef2
Q8K0D5	EFGM	EFGM	Gfm1
Q8C845	Q8C845	EFHD2	Efhd2
Q8BFR5	EFTU	EFTU	Tufm
Q9QXY6	EHD3	EHD3	Ehd3
P62869	ELOB	ELOB	Elob
Q8C522	ENDD1	ENDD1	Endod1
P17182	ENOA	ENOA	Eno1
D3Z6E4	D3Z6E4	ENOG	Eno2
P08113	ENPL	ENPL	Hsp90b1
O55026	ENTP2	ENTP2	Entpd2
A0A1D5RLS1	A0A1D5RLS1	EP15R	Eps15l1
Q3UHT7	Q3UHT7	ERC2	Erc2
Q8BFZ9	ERLN2	ERLN2	Erlin2
Q99LC5	ETFA	ETFA	Etfa
Q9DCW4	ETFB	ETFB	Etfb
Q6PF96	Q6PF96	ETFD	Etfdh
Q9DCM0	ETHE1	ETHE1	Ethe1
Q8C163	EXOG	EXOG	Exog
P26040	EZRI	EZRI	Ezr
Q9CR98	F136A	F136A	Fam136a
Q9D6U8	F162A	F162A	Fam162a
Q05816	FABP5	FABP5	Fabp5
P11404	FABPH	FABPH	Fabp3
A0A0R4J094	A0A0R4J094	FAHD2	Fahd2a
F8VPU2	FARP1	FARP1	Farp1
A0A0U1RNJ1	A0A0U1RNJ1	FAS	Fasn
A6X941	A6X941	FERM2	Fermt2
G3X9U9	G3X9U9	FIS1	Fis1
O08917	FLOT1	FLOT1	Flot1
Q5SS83	Q5SS83	FLOT2	Flot2
Q61553	FSCN1	FSCN1	Fscn1
P97807	FUMH	FUMH	Fh
Q9D6K8	FUND2	FUND2	Fundc2
A0A0A0MQF6	A0A0A0MQF6	G3P	Gapdh
G5E8G3	G5E8G3	G5E8G3	Opcml
P06745	G6PI	G6PI	Gpi
Q9WV18	GABR1	GABR1	Gabbr1
Q80T41	GABR2	GABR2	Gabbr2
P61922	GABT	GABT	Abat
Q9D172	GAL3A	GAL3A	Gatd3
Q8BHN3	GANAB	GANAB	Ganab
P62874	GBB1	GBB1	Gnb1
P62880	GBB2	GBB2	Gnb2
P29387	GBB4	GBB4	Gnb4
A0A0N4SVT3	A0A0N4SVT3	GBG12	Gng12
P63213	GBG2	GBG2	Gng2
Q61016	GBG7	GBG7	Gng7
P62812	GBRA1	GBRA1	Gabra1
P50571	GBRB1	GBRB1	Gabrb1
A0A0A0MQ68	A0A0A0MQ68	GCDH	Gcdh
Q3USC7	Q3USC7	GD1L1	Gdap1l1
O88741	GDAP1	GDAP1	Gdap1
P50396	GDIA	GDIA	Gdi1
Q61598	GDIB	GDIB	Gdi2
Q99PT1	GDIR1	GDIR1	Arhgdia
E9Q912	GDS1	GDS1	Rap1gds1
A0JNY3	A0JNY3	GEPH	Gphn
P03995	GFAP	GFAP	Gfap
Q9D6M3	GHC1	GHC1	Slc25a22
Q9DB41	GHC2	GHC2	Slc25a18
P15105	GLNA	GLNA	Glul
E9Q197	E9Q197	GLOD4	Glod4
Q64516	GLPK	GLPK	Gk
Q80Y14	GLRX5	GLRX5	Glrx5
D3Z7P3	GLSK	GLSK	Gls
O08795	GLU2B	GLU2B	Prkcsh
P21278	GNA11	GNA11	Gna11
P27601	GNA13	GNA13	Gna13
B2RSH2	GNAI1	GNAI1	Gnai1
P08752	GNAI2	GNAI2	Gnai2
P18872	GNAO	GNAO	Gnao1
P21279	GNAQ	GNAQ	Gnaq
P63094	GNAS2	GNAS2	Gnas
O70443	GNAZ	GNAZ	Gnaz
P62881	GNB5	GNB5	Gnb5
E0CXN5	E0CXN5	GPDA	Gpd1
Q64521	GPDM	GPDM	Gpd2
P35802	GPM6A	GPM6A	Gpm6a
A2AEG6	A2AEG6	GPM6B	Gpm6b
S4R1E5	S4R1E5	GPX4	Gpx4
Q7TNB5	Q7TNB5	GRIA1	Gria1
P23819	GRIA2	GRIA2	Gria2
Q3UNH4	GRIN1	GRIN1	Gprin1
P38647	GRP75	GRP75	Hspa9
Q99LP6	GRPE1	GRPE1	Grpel1
A2AE89	A2AE89	GSTM1	Gstm1
P19157	GSTP1	GSTP1	Gstp1
P32037	GTR3	GTR3	Slc2a3
Q9R111	GUAD	GUAD	Gda
P43274	H14	H14	H1-4
Q6ZWY9	H2B1C	H2B1C	H2bc8
P62806	H4	H4	H4c16
Q8K2C9	HACD3	HACD3	Hacd3
P01942	HBA	HBA	Hba
A8DUK4	A8DUK4	HBB1	Hbb-b1
A2AFQ2	A2AFQ2	HCD2	Hsd17b10
Q61425	HCDH	HCDH	Hadh
Q640R3	HECAM	HECAM	Hepacam
A0A494BAI5	A0A494BAI5	HEMH	Fech
Q8QZS1	HIBCH	HIBCH	Hibch
Q9D0S9	HINT2	HINT2	Hint2
Q9CPS6	HINT3	HINT3	Hint3
P38060	HMGCL	HMGCL	Hmgcl
B2M1R6	B2M1R6	HNRPK	Hnrnpk
Q8VEK3	HNRPU	HNRPU	Hnrnpu
E9Q0I7	E9Q0I7	HOME1	Homer1
E9PV73	E9PV73	HPCA	Hpca
Q80WM4	HPLN4	HPLN4	Hapln4
E9Q0U7	E9Q0U7	HS105	Hsph1
Q8K0U4	HS12A	HS12A	Hspa12a
E0CY23	E0CY23	HS74L	Hspa4l
P07901	HS90A	HS90A	Hsp90aa1
P11499	HS90B	HS90B	Hsp90ab1
Q8BTX9	HSDL1	HSDL1	Hsdl1
Q2TPA8	HSDL2	HSDL2	Hsdl2
Q3U2G2	Q3U2G2	HSP74	Hspa4
P63017	HSP7C	HSP7C	Hspa8
D3YX27	D3YX27	HTRA2	Htra2
G3UVV4	G3UVV4	HXK1	Hk1
I3ITR1	I3ITR1	I3ITR1	AK157302
Q3TZT4	Q3TZT4	I5P1	Inpp5a
Q60625	ICAM5	ICAM5	Icam5
Q9D6R2	IDH3A	IDH3A	Idh3a
P70404	IDHG1	IDHG1	Idh3g
P54071	IDHP	IDHP	Idh2
A0A0A0MQM0	A0A0A0MQM0	IF5A1	Eif5a
A0A0R4J117	A0A0R4J117	IGSF8	Igsf8
Q80ZJ2	Q80ZJ2	IMPA1	Impa1
D3Z636	D3Z636	IPYR2	Ppa2
A0A1D5RM83	A0A1D5RM83	IQEC1	Iqsec1
A4GZ26	A4GZ26	IQEC2	Iqsec2
P85094	ISC2A	ISC2A	Isoc2a
A0A1Y7VK19	A0A1Y7VK19	ISCA2	Isca2
P11881	ITPR1	ITPR1	Itpr1
Q9JHI5	IVD	IVD	Ivd
B1AQ77	B1AQ77	K1C15	Krt15
P04104	K2C1	K2C1	Krt1
Q9R0Y5	KAD1	KAD1	Ak1
Q9WTP7	KAD3	KAD3	Ak3
A2ARF6	A2ARF6	KAD4	Ak4
A0A0A6YX73	A0A0A6YX73	KAP2	Prkar2a
H3BK84	H3BK84	KAP3	Prkar2b
P11798	KCC2A	KCC2A	Camk2a
P28652	KCC2B	KCC2B	Camk2b
A0A0G2JGS4	A0A0G2JGS4	KCC2D	Camk2d
A0A2I3BQP6	A0A2I3BQP6	KCC2G	Camk2g
P63141	KCNA2	KCNA2	Kcna2
A0A140LHI4	A0A140LHI4	KCNC3	Kcnc3
Q04447	KCRB	KCRB	Ckb
P30275	KCRU	KCRU	Ckmt1
Q9CQX8	KGD4	KGD4	Mrps36
E0CZ72	E0CZ72	KIF2A	Kif2a
Q61768	KINH	KINH	Kif5b
P63318	KPCG	KPCG	Prkcg
P52480	KPYM	KPYM	Pkm
A2AFG7	A2AFG7	L1CAM	L1cam
Q91YP0	L2HDH	L2HDH	L2hgdh
A0A1L1SVF9	A0A1L1SVF9	LACTB	Lactb
P11438	LAMP1	LAMP1	Lamp1
B2KGR2	B2KGR2	LANC1	Lancl1
F6RJV6	F6RJV6	LANC2	Lancl2
Q61792	LASP1	LASP1	Lasp1
Q9Z127	LAT1	LAT1	Slc7a5
A0A1B0GSX0	A0A1B0GSX0	LDHA	Ldha
A0A6I8MX27	A0A6I8MX27	LDHB	Ldhb
Q9Z2I0	LETM1	LETM1	Letm1
A0A0G2JGB7	A0A0G2JGB7	LGI1	Lgi1
Q8K406	LGI3	LGI3	Lgi3
A9DA50	A9DA50	LIGO1	Lingo1
P63005	LIS1	LIS1	Pafah1b1
Q9DC07	LNEBL	LNEBL	Nebl
Q8CGK3	LONM	LONM	Lonp1
Q6PB66	LPPRC	LPPRC	Lrpprc
A0A0R4J0I9	A0A0R4J0I9	LRP1	Lrp1
A0A087WP80	A0A087WP80	LSAMP	Lsamp
Q8K356	Q8K356	LY6H	Ly6h
F6QHD1	F6QHD1	LYRIC	Mtdh
Q9CR62	M2OM	M2OM	Slc25a11
A0A1Y7VJZ2	A0A1Y7VJZ2	MAAI	Gstz1
Q922B1	MACD1	MACD1	Macrod1
A0A0A0MQA6	A0A0A0MQA6	MACF1	Macf1
Q3ZB60	Q3ZB60	MAG	Mag
Q8BI08	MAL2	MAL2	Mal2
Q99KE1	MAOM	MAOM	Me2
Q8BMF3	MAON	MAON	Me3
A2ARP8	A2ARP8	MAP1A	Map1a
P14873	MAP1B	MAP1B	Map1b
A0A0G2JDN7	A0A0G2JDN7	MAP4	Map4
Q7TSJ2	MAP6	MAP6	Map6
Q922Q1	MARC2	MARC2	Mtarc2
P26645	MARCS	MARCS	Marcks
Q6PER3	MARE3	MARE3	Mapre3
A0A498WGS3	A0A498WGS3	MBP	Mbp
Q99MR8	MCCA	MCCA	Mccc1
Q3ULD5	MCCB	MCCB	Mccc2
Q3UMR5	MCU	MCU	Mcu
A0A5F8MPN8	A0A5F8MPN8	MDHC	Mdh1
P08249	MDHM	MDHM	Mdh2
Q9DCS3	MECR	MECR	Mecr
Q80U63	MFN2	MFN2	Mfn2
Q7TNS2	MIC10	MIC10	Micos10
Q9CRB9	MIC19	MIC19	Chchd3
E9Q4M4	E9Q4M4	MIC25	Chchd6
Q9DCZ4	MIC26	MIC26	Apoo
Q78IK4	MIC27	MIC27	Apool
Q8CAQ8	MIC60	MIC60	Immt
Q9CTY5	MICU3	MICU3	Micu3
Q8BG51	MIRO1	MIRO1	Rhot1
Q3URS9	MITOK	MITOK	Ccdc51
Q9CXJ4	MITOS	MITOS	Abcb8
Q3THE2	ML12B	ML12B	Myl12b
Q9D273	MMAB	MMAB	Mmab
Q9EQ20	MMSA	MMSA	Aldh6a1
P26041	MOES	MOES	Msn
Q3UY21	Q3UY21	MOG	Mog
P53986	MOT1	MOT1	Slc16a1
P31938	MP2K1	MP2K1	Map2k1
D3Z786	D3Z786	MPC1	Mpc1
Q9D023	MPC2	MPC2	Mpc2
Q8VEM8	MPCP	MPCP	Slc25a3
Q9WV34	MPP2	MPP2	Mpp2
A0A668KLC6	A0A668KLC6	MTAP2	Map2
Q791T5	MTCH1	MTCH1	Mtch1
A2AFW6	A2AFW6	MTCH2	Mtch2
A0A6I8MWZ8	A0A6I8MWZ8	MTX1	Mtx1
O88441	MTX2	MTX2	Mtx2
P16332	MUTA	MUTA	Mmut
B2RRE2	B2RRE2	MY18A	Myo18a
Q5SV64	Q5SV64	MYH10	Myh10
Q8VDD5	MYH9	MYH9	Myh9
A0A1W2P6F6	A0A1W2P6F6	MYL6	Myl6
Q5SYD0	MYO1D	MYO1D	Myo1d
D3YZ62	D3YZ62	MYO5A	Myo5a
E9PVU0	E9PVU0	MYO6	Myo6
P60202	MYPR	MYPR	Plp1
Q8K596	NAC2	NAC2	Slc8a2
A0A7N9VS49	A0A7N9VS49	NAKD2	Nadk2
Q9DB73	NB5R1	NB5R1	Cyb5r1
F2Z456	F2Z456	NB5R3	Cyb5r3
P13595	NCAM1	NCAM1	Ncam1
O35136	NCAM2	NCAM2	Ncam2
A0A0R4IZX5	A0A0R4IZX5	NCAN	Ncan
Q9Z0E0	NCDN	NCDN	Ncdn
Q8BLF1	NCEH1	NCEH1	Nceh1
A2AS98	A2AS98	NCKP1	Nckap1
E9PZF0	E9PZF0	NDKA	Nme1
Q9QYG0	NDRG2	NDRG2	Ndrg2
Q9CQ75	NDUA2	NDUA2	Ndufa2
A0A0N4SVQ1	A0A0N4SVQ1	NDUA4	Ndufa4
Q9CPP6	NDUA5	NDUA5	Ndufa5
Q9CQZ5	NDUA6	NDUA6	Ndufa6
Q9Z1P6	NDUA7	NDUA7	Ndufa7
Q9DCJ5	NDUA8	NDUA8	Ndufa8
A0A0R3P9C8	A0A0R3P9C8	NDUA9	Ndufa9
Q99LC3	NDUAA	NDUAA	Ndufa10
G5E814	G5E814	NDUAB	Ndufa11
Q7TMF3	NDUAC	NDUAC	Ndufa12
Q9ERS2	NDUAD	NDUAD	Ndufa13
Q9CQC7	NDUB4	NDUB4	Ndufb4
D3Z568	D3Z568	NDUB5	Ndufb5
Q3UIU2	NDUB6	NDUB6	Ndufb6
Q9CR61	NDUB7	NDUB7	Ndufb7
Q9D6J5	NDUB8	NDUB8	Ndufb8
Q9CQJ8	NDUB9	NDUB9	Ndufb9
Q9DCS9	NDUBA	NDUBA	Ndufb10
Q9CQ54	NDUC2	NDUC2	Ndufc2
Q91VD9	NDUS1	NDUS1	Ndufs1
Q91WD5	NDUS2	NDUS2	Ndufs2
Q9DCT2	NDUS3	NDUS3	Ndufs3
E9QPX3	E9QPX3	NDUS4	Ndufs4
B1ARW4	B1ARW4	NDUS5	Ndufs5
A0A1Y7VM38	A0A1Y7VM38	NDUS6	Ndufs6
Q9DC70	NDUS7	NDUS7	Ndufs7
Q8K3J1	NDUS8	NDUS8	Ndufs8
D3YUM1	D3YUM1	NDUV1	Ndufv1
Q9D6J6	NDUV2	NDUV2	Ndufv2
Q8BK30	NDUV3	NDUV3	Ndufv3
Q9CR95	NECP1	NECP1	Necap1
A0A4W9	A0A4W9	NEGR1	Negr1
A0A286YD12	A0A286YD12	NEUL	Nln
P06837	NEUM	NEUM	Gap43
Q04690	NF1	NF1	Nf1
Q810U3	NFASC	NFASC	Nfasc
P19246	NFH	NFH	Nefh
P08551	NFL	NFL	Nefl
A0A0R4J036	A0A0R4J036	NFM	Nefm
Q9Z1J3	NFS1	NFS1	Nfs1
O55125	NIPS1	NIPS1	Nipsnap1
Q7TMG8	Q7TMG8	NIPS2	Nipsnap2
Q69ZK9	NLGN2	NLGN2	Nlgn2
G3X9V4	G3X9V4	NMDE2	Grin2b
A2AI14	A2AI14	NMDZ1	Grin1
J3QMM7	J3QMM7	NNRD	Naxd
Q61941	NNTM	NNTM	Nnt
A3KGE4	A3KGE4	NOE1	Olfm1
P97300	NPTN	NPTN	Nptn
Q62443	NPTX1	NPTX1	Nptx1
E9PZM8	E9PZM8	NPTXR	Nptxr
E0CY11	E0CY11	NRX1A	Nrxn1
P46460	NSF	NSF	Nsf
Q3UHB1	NT5D3	NT5D3	Nt5dc3
D3Z396	D3Z396	NTRI	Ntm
P03921	NU5M	NU5M	Mtnd5
P29758	OAT	OAT	Oat
A0A0J9YUB6	A0A0J9YUB6	OCAD1	Ociad1
Q9D8W7	OCAD2	OCAD2	Ociad2
P53395	ODB2	ODB2	Dbt
Q60597	ODO1	ODO1	Ogdh
Q9D2G2	ODO2	ODO2	Dlst
Q8BMF4	ODP2	ODP2	Dlat
P35486	ODPA	ODPA	Pdha1
Q9D051	ODPB	ODPB	Pdhb
Q8BKZ9	ODPX	ODPX	Pdhx
G3XA53	G3XA53	OMGP	Omg
P58281	OPA1	OPA1	Opa1
D3YWF6	D3YWF6	OTUB1	Otub1
Q4KMM3	OXR1	OXR1	Oxr1
Q922Q4	P5CR2	P5CR2	Pycr2
Q9Z110	P5CS	P5CS	Aldh18a1
Q61644	PACN1	PACN1	Pacsin1
Q9Z0P4	PALM	PALM	Palm
Q9JLB0	PALS2	PALS2	Pals2
Q91ZA3	PCCA	PCCA	Pcca
Q99MN9	PCCB	PCCB	Pccb
A0A0R4J0G0	A0A0R4J0G0	PCKGM	Pck2
Q9QYX7	PCLO	PCLO	Pclo
Q9QXV0	PCS1N	PCS1N	Pcsk1n
P09103	PDIA1	PDIA1	P4hb
P27773	PDIA3	PDIA3	Pdia3
Q8BFP9	PDK1	PDK1	Pdk1
Q62048	PEA15	PEA15	Pea15
P70296	PEBP1	PEBP1	Pebp1
P12382	PFKAL	PFKAL	Pfkl
P47857	PFKAM	PFKAM	Pfkm
Q8C605	Q8C605	PFKAP	Pfkp
Q9DBJ1	PGAM1	PGAM1	Pgam1
P09411	PGK1	PGK1	Pgk1
A2CEK3	A2CEK3	PGM1	Pgm1
P67778	PHB1	PHB1	Phb1
O35129	PHB2	PHB2	Phb2
Q80TL4	PHF24	PHF24	Phf24
Q8K0S0	PHYIP	PHYIP	Phyhip
A0A140T8I9	A0A140T8I9	PI4KA	Pi4ka
E0CYV0	E0CYV0	PIMT	Pcmt1
Q9Z1B3	PLCB1	PLCB1	Plcb1
Q9QXS1	PLEC	PLEC	Plec
Q99JY8	PLPP3	PLPP3	Plpp3
A0A0G2JGY9	A0A0G2JGY9	PLPR4	Plppr4
P62137	PP1A	PP1A	Ppp1ca
P62715	PP2AB	PP2AB	Ppp2cb
P63328	PP2BA	PP2BA	Ppp3ca
P17742	PPIA	PPIA	Ppia
P24369	PPIB	PPIB	Ppib
Q9CR16	PPID	PPID	Ppid
P35700	PRDX1	PRDX1	Prdx1
Q61171	PRDX2	PRDX2	Prdx2
P20108	PRDX3	PRDX3	Prdx3
P99029	PRDX5	PRDX5	Prdx5
D3Z0Y2	D3Z0Y2	PRDX6	Prdx6
Q9WU79	PROD	PROD	Prodh
P62962	PROF1	PROF1	Pfn1
D3YWS3	D3YWS3	PROF2	Pfn2
E9PUL5	PRRT2	PRRT2	Prrt2
Q11011	PSA	PSA	Npepps
Q9Z2U1	PSA5	PSA5	Psma5
O55234	PSB5	PSB5	Psmb5
Q8BGC4	PTGR3	PTGR3	Ptgr3
P80560	PTPR2	PTPR2	Ptprn2
P18052	PTPRA	PTPRA	Ptpra
A0A0J9YVD2	A0A0J9YVD2	PTPRZ	Ptprz1
P42669	PURA	PURA	Pura
Q3U125	Q3U125	PXL2A	Prxl2a
Q9DB60	PXL2B	PXL2B	Prxl2b
G5E8R3	G5E8R3	PYC	Pcx
Q8CI94	PYGB	PYGB	Pygb
E9PUM3	E9PUM3	PYGM	Pygm
Q68FG2	Q68FG2	Q68FG2	Sptbn2
Q91VA7	Q91VA7	Q91VA7	Idh3b
Q9CZ13	QCR1	QCR1	Uqcrc1
Q9CPX8	QCR10	QCR10	Uqcr11
Q9DB77	QCR2	QCR2	Uqcrc2
Q9CQB4	Q9CQB4	QCR7	Uqcrb
Q9CQ69	QCR8	QCR8	Uqcrq
Q8R1I1	QCR9	QCR9	Uqcr10
Q3UNZ8	QORL2	QORL2	Cryzl2
P61027	RAB10	RAB10	Rab10
Q91V41	RAB14	RAB14	Rab14
A0A3Q4EI12	A0A3Q4EI12	RAB18	Rab18
P62821	RAB1A	RAB1A	Rab1A
P35282	RAB21	RAB21	Rab21
P53994	RAB2A	RAB2A	Rab2a
Q6PHN9	RAB35	RAB35	Rab35
P63011	RAB3A	RAB3A	Rab3a
A0A286YDR2	A0A286YDR2	RAB3C	Rab3c
Q8C266	Q8C266	RAB5C	Rab5c
P35279	RAB6A	RAB6A	Rab6a
P51150	RAB7A	RAB7A	Rab7a
P61028	RAB8B	RAB8B	Rab8b
P60764	RAC3	RAC3	Rac3
P63321	RALA	RALA	Rala
Q14AA6	Q14AA6	RANT	Rasl2-9
P62835	RAP1A	RAP1A	Rap1a
Q80ZJ1	RAP2A	RAP2A	Rap2a
Q61411	RASH	RASH	Hras
G3UY29	G3UY29	RB11B	Rab11b
A0A0R4J1N8	A0A0R4J1N8	RDH13	Rdh13
Q9ERI6	RDH14	RDH14	Rdh14
G3X8R0	G3X8R0	REEP5	Reep5
A0A0A6YXF6	A0A0A6YXF6	RHOA	Rhoa
P62746	RHOB	RHOB	Rhob
P84096	RHOG	RHOG	Rhog
P52760	RIDA	RIDA	Rida
A2BH06	A2BH06	RL11	Rpl11
P35979	RL12	RL12	Rpl12
P47963	RL13	RL13	Rpl13
Q9CR57	RL14	RL14	Rpl14
Q9CZM2	RL15	RL15	Rpl15
A0A1B0GQU8	A0A1B0GQU8	RL18	Rpl18
P61358	RL27	RL27	Rpl27
P41105	RL28	RL28	Rpl28
P27659	RL3	RL3	Rpl3
P62889	RL30	RL30	Rpl30
Q9D8E6	RL4	RL4	Rpl4
P47911	RL6	RL6	Rpl6
F6XI62	F6XI62	RL7	Rpl7
P62918	RL8	RL8	Rpl8
A0A0G2JES3	A0A0G2JES3	RL9	Rpl9
P99027	RLA2	RLA2	Rplp2
Q9DB15	RM12	RM12	Mrpl12
Q8CI78	RMND1	RMND1	Rmnd1
A0A1Y7VMN0	A0A1Y7VMN0	ROCK2	Rock2
P47708	RP3A	RP3A	Rph3a
Q9EQZ6	RPGF4	RPGF4	Rapgef4
Q91YQ5	RPN1	RPN1	Rpn1
D3YVC1	D3YVC1	RS2	Rps2
P62754	RS6	RS6	Rps6
P62242	RS8	RS8	Rps8
Q80X85	RT07	RT07	Mrps7
Q9CXW2	RT22	RT22	Mrps22
F7ARZ1	F7ARZ1	RT23	Mrps23
Q8K0T0	RTN1	RTN1	Rtn1
Q99P72	RTN4	RTN4	Rtn4
Q91V77	Q91V77	S10A1	S100a1
E9QM38	E9QM38	S12A2	Slc12a2
A0A076FR46	A0A076FR46	S12A5	Slc12a5
Q8BH59	S2512	S2512	Slc25a12
Q8BGP6	S2540	S2540	Slc25a40
A0A3Q4L2U5	A0A3Q4L2U5	S2546	Slc25a46
A2AKV9	A2AKV9	S2551	Slc25a51
Q91VE0	S27A4	S27A4	Slc27a4
A0A0A6YWF5	A0A0A6YWF5	S38A3	Slc38a3
Q5FWH7	S39AC	S39AC	Slc39a12
Q5DTL9	S4A10	S4A10	Slc4a10
E9Q8N8	E9Q8N8	S4A4	Slc4a4
P31650	S6A11	S6A11	Slc6a11
Q80SW1	SAHH2	SAHH2	Ahcyl1
F8WGT1	F8WGT1	SAHH3	Ahcyl2
Q8BGH2	SAM50	SAM50	Samm50
J3QPG5	J3QPG5	SAP	Psap
O35874	SATT	SATT	Slc1a4
P31648	SC6A1	SC6A1	Slc6a1
B2RQX9	B2RQX9	SC6A5	Slc6a5
Q8C8N2	SCAI	SCAI	Scai
Q8K021	SCAM1	SCAM1	Scamp1
Q9JKD3	SCAM5	SCAM5	Scamp5
A2ASZ8	SCMC2	SCMC2	Slc25a25
Q6GQS1	SCMC3	SCMC3	Slc25a23
A0A5H1ZRM8	A0A5H1ZRM8	SCN2A	Scn2a
Q3UJQ9	Q3UJQ9	SCOT1	Oxct1
P32020	SCP2	SCP2	Scp2
Q8R127	SCPDL	SCPDL	Sccpdh
O35114	SCRB2	SCRB2	Scarb2
Q9CZC8	SCRN1	SCRN1	Scrn1
Q8K2B3	SDHA	SDHA	Sdha
Q9CQA3	SDHB	SDHB	Sdhb
A0A0J9YTY0	A0A0J9YTY0	SEPT11	Septin11
D3YYB1	D3YYB1	SEPT2	Septin2
A0A2R8W6V9	A0A2R8W6V9	SEPT3	Septin3
A0A338P6R8	A0A338P6R8	SEPT5	Septin5
E9Q1G8	E9Q1G8	SEPT7	Septin7
B1AQY9	B1AQY9	SEPT8	Septin8
A2A6U3	A2A6U3	SEPT9	Septin9
Q61753	SERA	SERA	Phgdh
Q99K85	SERC	SERC	Psat1
Q99JR1	SFXN1	SFXN1	Sfxn1
Q3U4F0	Q3U4F0	SFXN3	Sfxn3
Q8BRQ9	Q8BRQ9	SFXN5	Sfxn5
A0A3B2W7K0	A0A3B2W7K0	SH3G1	Sh3gl1
D3YZU1	SHAN1	SHAN1	Shank1
D3Z5K8	D3Z5K8	SHAN2	Shank2
Q4ACU6	SHAN3	SHAN3	Shank3
A2AWI7	A2AWI7	SHLB2	Sh3glb2
P97797	SHPS1	SHPS1	Sirpa
Q8C3Q5	SHSA7	SHSA7	Shisa7
A0A140LHL5	A0A140LHL5	SIR2	Sirt2
Q9WTX5	SKP1	SKP1	Skp1
Q9DB05	SNAA	SNAA	Napa
P28663	SNAB	SNAB	Napb
D3Z4B2	D3Z4B2	SNAG	Napg
O55100	SNG1	SNG1	Syngr1
Q8R191	SNG3	SNG3	Syngr3
P60879	SNP25	SNP25	Snap25
B2FDF6	B2FDF6	SNP47	Snap47
Q80U23	SNPH	SNPH	Snph
Q6NZD2	Q6NZD2	SNX1	Snx1
P08228	SODC	SODC	Sod1
P09671	SODM	SODM	Sod2
Q6NZL0	SOGA3	SOGA3	Soga3
D3YXB7	D3YXB7	SPG7	Spg7
G3UXX3	G3UXX3	SPRE	Spr
Q91WK1	SPRY4	SPRY4	Spryd4
E9Q397	E9Q397	SPTB1	Sptb
Q62261	SPTB2	SPTB2	Sptbn1
A3KGU5	A3KGU5	SPTN1	Sptan1
Q9R112	SQOR	SQOR	Sqor
P05480	SRC	SRC	Src
Q921L6	Q921L6	SRC8	Cttn
A0A571BDG0	A0A571BDG0	SRCN1	Srcin1
Q8BWF0	SSDH	SSDH	Aldh5a1
Q3UGN9	Q3UGN9	STAM1	Stam
Q5DQR4	STB5L	STB5L	Stxbp5l
Q99JB2	STML2	STML2	Stoml2
D3Z1Z8	D3Z1Z8	STMN1	Stmn1
Q9ER00	STX12	STX12	Stx12
O35526	STX1A	STX1A	Stx1a
P61264	STX1B	STX1B	Stx1b
Q8BH40	Q8BH40	STX7	Stx7
O08599	STXB1	STXB1	Stxbp1
Q9WUM5	SUCA	SUCA	Suclg1
Q9Z2I9	SUCB1	SUCB1	Sucla2
Q9Z2I8	SUCB2	SUCB2	Suclg2
Q9JIS5	SV2A	SV2A	Sv2a
Q8BG39	SV2B	SV2B	Sv2b
A0A0J9YVH8	A0A0J9YVH8	SYGP1	Syngap1
Q8BIJ6	SYIM	SYIM	Iars2
O88935	SYN1	SYN1	Syn1
Q64332	SYN2	SYN2	Syn2
Q8JZP2	SYN3	SYN3	Syn3
D3Z656	D3Z656	SYNJ1	Synj1
Q8CC35	SYNPO	SYNPO	Synpo
Q62277	SYPH	SYPH	Syp
P46096	SYT1	SYT1	Syt1
A0A0R4J2C2	A0A0R4J2C2	SYT2	Syt2
O55042	SYUA	SYUA	Snca
Q91ZZ3	SYUB	SYUB	Sncb
Q9R1Q8	TAGL3	TAGL3	Tagln3
B1AQW2	B1AQW2	TAU	Mapt
A0A0A0MQA5	A0A0A0MQA5	TBA4A	Tuba4a
Q9ERD7	TBB3	TBB3	Tubb3
Q9D6F9	TBB4A	TBB4A	Tubb4a
P99024	TBB5	TBB5	Tubb5
P11983	TCPA	TCPA	Tcp1
P80314	TCPB	TCPB	Cct2
G5E839	G5E839	TCPD	Cct4
P80316	TCPE	TCPE	Cct5
E9Q133	E9Q133	TCPG	Cct3
A0A0N4SV00	A0A0N4SV00	TCPH	Cct7
P42932	TCPQ	TCPQ	Cct8
Q52KG9	Q52KG9	TCPZ	Cct6a
A0A0G2JE08	A0A0G2JE08	TDRKH	Tdrkh
Q8BYI9	TENR	TENR	Tnr
Q01853	TERA	TERA	Vcp
Q3UUI3	THEM4	THEM4	Them4
H3BKL5	H3BKL5	THIKA	Acaa1a
Q8QZT1	THIL	THIL	Acat1
Q8BWT1	THIM	THIM	Acaa2
P10639	THIO	THIO	Txn
Q99J99	THTM	THTM	Mpst
P52196	THTR	THTR	Tst
A0A1L1SUX8	A0A1L1SUX8	THY1	Thy1
P62073	TIM10	TIM10	Timm10
A0A1W2P756	A0A1W2P756	TIM13	Timm13
Q9CQ85	TIM22	TIM22	Timm22
O35857	TIM44	TIM44	Timm44
Q9D880	TIM50	TIM50	Timm50
Q9WV98	TIM9	TIM9	Timm9
P40142	TKT	TKT	Tkt
A0A1L1SQ51	A0A1L1SQ51	TLN2	Tln2
Q9CR76	TM186	TM186	Tmem186
Q4VAE3	TMM65	TMM65	Tmem65
A0A1L1SU70	A0A1L1SU70	TMOD2	Tmod2
D3Z2J6	D3Z2J6	TMX2	Tmx2
Q9CPQ3	TOM22	TOM22	Tomm22
Q9CZW5	TOM70	TOM70	Tomm70
A2AUD5	A2AUD5	TPD54	Tpd52l2
P17751	TPIS	TPIS	Tpi1
E9Q453	E9Q453	TPM1	Tpm1
D3Z6I8	D3Z6I8	TPM3	Tpm3
O89023	TPP1	TPP1	Tpp1
Q7TQD2	TPPP	TPPP	Tppp
Q9CRB6	TPPP3	TPPP3	Tppp3
Q9CQN1	TRAP1	TRAP1	Trap1
Q921I1	TRFE	TRFE	Tf
A0A0G2JDX4	A0A0G2JDX4	TSN2	Tspan2
Q91YR1	TWF1	TWF1	Twf1
Q8JZU2	TXTP	TXTP	Slc25a1
Q02053	UBA1	UBA1	Uba1
P61089	UBE2N	UBE2N	Ube2n
Q3U4W8	Q3U4W8	UBP5	Usp5
Q9R0P9	UCHL1	UCHL1	Uchl1
Q9CR68	UCRI	UCRI	Uqcrfs1
P51863	VA0D1	VA0D1	Atp6v0d1
A0A1D5RLY2	A0A1D5RLY2	VAC14	Vac14
A0A0N4SUV3	A0A0N4SUV3	VAMP1	Vamp1
B0QZN5	B0QZN5	VAMP2	Vamp2
Q8BH80	Q8BH80	VAPB	Vapb
Q62465	VAT1	VAT1	Vat1
P50516	VATA	VATA	Atp6v1a
P62814	VATB2	VATB2	Atp6v1b2
Q9Z1G3	VATC1	VATC1	Atp6v1c1
P57746	VATD	VATD	Atp6v1d
P50518	VATE1	VATE1	Atp6v1e1
Q9D1K2	VATF	VATF	Atp6v1f
Q9CR51	VATG1	VATG1	Atp6v1g1
Q9WTT4	VATG2	VATG2	Atp6v1g2
A0A0A6YX18	A0A0A6YX18	VATH	Atp6v1h
Q60932	VDAC1	VDAC1	Vdac1
G3UX26	G3UX26	VDAC2	Vdac2
J3QMG3	J3QMG3	VDAC3	Vdac3
Q0VGU4	VGF	VGF	Vgf
O35633	VIAAT	VIAAT	Slc32a1
P20152	VIME	VIME	Vim
P62761	VISL1	VISL1	Vsnl1
K3W4T3	K3W4T3	VPP1	Atp6v0a1
Q9EQH3	VPS35	VPS35	Vps35
Q8CC88	VWA8	VWA8	Vwa8
O88342	WDR1	WDR1	Wdr1
Q8CBE3	WDR37	WDR37	Wdr37
Q920I9	WDR7	WDR7	Wdr7

## Sheet: WT - 12M
WT 12 Month Lipofuscin Proteome (n = 1014)
UniProt Accession	SWISSPROT Accession	UniProt ID	Gene Name
Q9CQV8	1433B	1433B	Ywhab
P62259	1433E	1433E	Ywhae
P68510	1433F	1433F	Ywhah
P61982	1433G	1433G	Ywhag
P68254	1433T	1433T	Ywhaq
P63101	1433Z	1433Z	Ywhaz
Q76MZ3	2AAA	2AAA	Ppp2r1a
Q99L13	3HIDH	3HIDH	Hibadh
P10852	4F2	4F2	Slc3a2
A0A0A6YW67	A0A0A6YW67	A0A0A6YW67	Gm8797
A0A1Y7VKY1	A0A1Y7VKY1	A0A1Y7VKY1	Rps18-ps5
A0A668KL51	A0A668KL51	A0A668KL51	Idh3b
Q3UHJ0	AAK1	AAK1	Aak1
P05201	AATC	AATC	Got1
P05202	AATM	AATM	Got2
Q61102	ABCB7	ABCB7	Abcb7
Q99LR1	ABD12	ABD12	Abhd12
Q8R2Y0	ABHD6	ABHD6	Abhd6
Q6PE15	ABHDA	ABHDA	Abhd10
A0A087WNT3	A0A087WNT3	ABI2	Abi2
E9Q030	E9Q030	ABLM1	Ablim1
D3Z0Y4	D3Z0Y4	ABLM2	Ablim2
A0A0R4J0P1	A0A0R4J0P1	ACAD8	Acad8
Q8JZN5	ACAD9	ACAD9	Acad9
A0A0R4J083	A0A0R4J083	ACADL	Acadl
P45952	ACADM	ACADM	Acadm
P50544	ACADV	ACADV	Acadvl
Q99PU5	ACBG1	ACBG1	Acsbg1
Q9DBL1	ACDSB	ACDSB	Acadsb
Q91V92	ACLY	ACLY	Acly
A2AVR6	A2AVR6	ACO11	Acot11
Q9CQR4	ACO13	ACO13	Acot13
Q99KI0	ACON	ACON	Aco2
Q9R0X4	ACOT9	ACOT9	Acot9
F6ZFT1	F6ZFT1	ACPM	Ndufab1
Q8VCW8	ACSF2	ACSF2	Acsf2
D3Z041	D3Z041	ACSL1	Acsl1
Q5ICG5	Q5ICG5	ACSL6	Acsl6
P60710	ACTB	ACTB	Actb
P63260	ACTG	ACTG	Actg1
A1BN54	A1BN54	ACTN1	Actn1
A0A1L1SV25	A0A1L1SV25	ACTN4	Actn4
E9QJT5	E9QJT5	ACYP1	Acyp1
D3YUP9	D3YUP9	ADA22	Adam22
Q9R1V7	ADA23	ADA23	Adam23
Q9D0L4	ADCK1	ADCK1	Adck1
F8WGR0	F8WGR0	ADDA	Add1
Q9QYB8	ADDB	ADDB	Add2
Q9QYB5	ADDG	ADDG	Add3
P48962	ADT1	ADT1	Slc25a4
P51881	ADT2	ADT2	Slc25a5
Q8JZQ2	AFG32	AFG32	Afg3l2
Q3UHD9	AGAP2	AGAP2	Agap2
Q9ESW4	AGK	AGK	Agk
H7BX15	H7BX15	AGRL1	Adgrl1
D3YTW7	D3YTW7	AGRL3	Adgrl3
B1AU25	B1AU25	AIFM1	Aifm1
P46660	AINX	AINX	Ina
A2AJA9	AJM1	AJM1	Ajm1
Q9JII6	AK1A1	AK1A1	Akr1a1
D3YVF0	AKAP5	AKAP5	Akap5
P24549	AL1A1	AL1A1	Aldh1a1
Q9CZS1	AL1B1	AL1B1	Aldh1b1
Q8R0Y6	AL1L1	AL1L1	Aldh1l1
B1ATI0	B1ATI0	AL3A2	Aldh3a2
Q8CHT0	AL4A1	AL4A1	Aldh4a1
G3UYR8	G3UYR8	AL7A1	Aldh7a1
Q9JLJ2	AL9A1	AL9A1	Aldh9a1
A0A0G2JEU1	A0A0G2JEU1	ALDH2	Aldh2
A6ZI44	A6ZI44	ALDOA	Aldoa
P05063	ALDOC	ALDOC	Aldoc
P45376	ALDR	ALDR	Akr1b1
A0A0G2JEG8	A0A0G2JEG8	AMPH	Amph
Q9CPY7	AMPL	AMPL	Lap3
A0A0R4J1N7	A0A0R4J1N7	ANK1	Ank1
S4R2F3	S4R2F3	ANK2	Ank2
A0A1W2P812	A0A1W2P812	ANK3	Ank3
A0A0R4J2A6	A0A0R4J2A6	ANS1B	Anks1b
P48036	ANXA5	ANXA5	Anxa5
F8WIT2	F8WIT2	ANXA6	Anxa6
Q64133	AOFA	AOFA	Maoa
Q8BW75	AOFB	AOFB	Maob
Q61548	AP180	AP180	Snap91
O35643	AP1B1	AP1B1	Ap1b1
P35585	AP1M1	AP1M1	Ap1m1
P17426	AP2A1	AP2A1	Ap2a1
P17427	AP2A2	AP2A2	Ap2a2
Q9DBG3	AP2B1	AP2B1	Ap2b1
Q3TWV4	Q3TWV4	AP2M1	Ap2m1
A0A571BES1	A0A571BES1	AP3B2	Ap3b2
O54774	AP3D1	AP3D1	Ap3d1
A0A5F8MQ17	A0A5F8MQ17	AQP4	Aqp4
Q9R0Q6	ARC1A	ARC1A	Arpc1a
P61205	ARF3	ARF3	Arf3
P61750	ARF4	ARF4	Arf4
P62331	ARF6	ARF6	Arf6
Q3TGS9	Q3TGS9	ARFG1	Arfgap1
F6QKK2	F6QKK2	ARL8A	Arl8a
D3Z5T2	D3Z5T2	ARM10	Armc10
P61161	ARP2	ARP2	Actr2
Q99JY9	ARP3	ARP3	Actr3
Q641P0	ARP3B	ARP3B	Actr3b
Q9D898	ARP5L	ARP5L	Arpc5l
D3YXG6	D3YXG6	ARPC2	Arpc2
H7BWZ3	H7BWZ3	ARPC3	Arpc3
P59999	ARPC4	ARPC4	Arpc4
Q9CPW4	ARPC5	ARPC5	Arpc5
Q9WV54	ASAH1	ASAH1	Asah1
Q8C0M9	ASGL1	ASGL1	Asrgl1
Q8VDN2	AT1A1	AT1A1	Atp1a1
Q6PIE5	AT1A2	AT1A2	Atp1a2
A0A0G2JGX4	A0A0G2JGX4	AT1A3	Atp1a3
P14094	AT1B1	AT1B1	Atp1b1
P14231	AT1B2	AT1B2	Atp1b2
P97370	AT1B3	AT1B3	Atp1b3
O55143	AT2A2	AT2A2	Atp2a2
G5E829	AT2B1	AT2B1	Atp2b1
F8WHB1	F8WHB1	AT2B2	Atp2b2
Q9CQQ7	AT5F1	AT5F1	Atp5pb
A0A0M3HEP7	A0A0M3HEP7	AT8A1	Atp8a1
Q925I1	ATAD3	ATAD3	Atad3
E9PV44	E9PV44	ATIF1	Atpif1
Q8BH66	ATLA1	ATLA1	Atl1
P56382	ATP5E	ATP5E	Atp5f1e
Q9DCX2	ATP5H	ATP5H	Atp5pd
Q06185	ATP5I	ATP5I	Atp5me
P97450	ATP5J	ATP5J	Atp5pf
Q9CPQ8	ATP5L	ATP5L	Atp5mg
A0A1Y7VLP0	A0A1Y7VLP0	ATP68	Atp5mpl
P03930	ATP8	ATP8	Mtatp8
Q03265	ATPA	ATPA	Atp5f1a
P56480	ATPB	ATPB	Atp5f1b
Q9D3D9	ATPD	ATPD	Atp5f1d
Q8C2Q8	Q8C2Q8	ATPG	Atp5c1
P56135	ATPK	ATPK	Atp5mf
Q78IK2	ATPMK	ATPMK	Atp5mk
Q9DB20	ATPO	ATPO	Atp5po
A0A0R4J023	A0A0R4J023	AUHM	Auh
Q80TZ3	AUXI	AUXI	Dnajc6
B2RXT3	B2RXT3	B2RXT3	Ogdhl
P16283	B3A3	B3A3	Slc4a3
E9PYH2	E9PYH2	BACH	Acot7
B1AZ46	B1AZ46	BAIP2	Baiap2
P18572	BASI	BASI	Bsg
Q91XV3	BASP1	BASP1	Basp1
F7BNZ5	F7BNZ5	BCAS1	Bcas1
B2KFA8	B2KFA8	BCAT1	Bcat1
Q9CZP5	BCS1	BCS1	Bcs1l
Q80XN0	BDH	BDH	Bdh1
O08539	BIN1	BIN1	Bin1
P20029	BIP	BIP	Hspa5
Q9JM96	BORG4	BORG4	Cdc42ep4
Q8R164	BPHL	BPHL	Bphl
A0A1B0GRV0	A0A1B0GRV0	BPNT1	Bpnt1
Q91VR8	BRK1	BRK1	Brk1
O88737	BSN	BSN	Bsn
Q9DB72	BTBDH	BTBDH	Btbd17
P14106	C1QB	C1QB	C1qb
Q8R5L1	Q8R5L1	C1QBP	C1qbp
Q922D8	C1TC	C1TC	Mthfd1
Q3V3R1	C1TM	C1TM	Mthfd1l
Q80X80	C2C2L	C2C2L	C2cd2l
Q9CZB0	C560	C560	Sdhc
E9Q1X8	E9Q1X8	CA2D1	Cacna2d1
E9Q683	E9Q683	CA2D2	Cacna2d2
Q9Z1L5	CA2D3	CA2D3	Cacna2d3
A0A087WS83	A0A087WS83	CAC1E	Cacna1e
H7BX88	H7BX88	CACP	Crat
Q9WTR5	CAD13	CAD13	Cdh13
D3YYT0	D3YYT0	CADH2	Cdh2
A0A668KLV1	A0A668KLV1	CADM1	Cadm1
Q8BLQ9	CADM2	CADM2	Cadm2
K4DI58	K4DI58	CADM3	Cadm3
Q8R464	CADM4	CADM4	Cadm4
P00920	CAH2	CAH2	Ca2
P12658	CALB1	CALB1	Calb1
Q08331	CALB2	CALB2	Calb2
P0DP26	CALM1	CALM1	Calm1
P14211	CALR	CALR	Calr
P35564	CALX	CALX	Canx
A0A0A6YW88	A0A0A6YW88	CAMKV	Camkv
O08529	CAN2	CAN2	Capn2
Q63810	CANB1	CANB1	Ppp3r1
Q6ZQ38	CAND1	CAND1	Cand1
P40124	CAP1	CAP1	Cap1
D3YTR7	D3YTR7	CAP2	Cap2
Q80TJ1	CAPS1	CAPS1	Cadps
A2AMW0	A2AMW0	CAPZB	Capzb
P47754	CAZA2	CAZA2	Capza2
Q00493	CBPE	CBPE	Cpe
P48758	CBR1	CBR1	Cbr1
Q91VT4	CBR4	CBR4	Cbr4
D3YVV1	D3YVV1	CC50A	Tmem30a
S4R2F1	S4R2F1	CCG8	Cacng8
E9Q3Q6	E9Q3Q6	CD166	Alcam
A0A2R8VI30	A0A2R8VI30	CD47	Cd47
P60766	CDC42	CDC42	Cdc42
A2AMQ5	A2AMQ5	CDS2	Cds2
Q9JKC6	CEND	CEND	Cend1
Q64433	CH10	CH10	Hspe1
P63038	CH60	CH60	Hspd1
Q9D8B3	CHM4B	CHM4B	Chmp4b
Q91WS0	CISD1	CISD1	Cisd1
Q9CZU6	CISY	CISY	Cs
A0A0R4J0K2	A0A0R4J0K2	CKAP5	Ckap5
F7DCH5	F7DCH5	CLAP2	Clasp2
B1AWD8	B1AWD8	CLCA	Clta
Q6IRU5	CLCB	CLCB	Cltb
Q60771	CLD11	CLD11	Cldn11
Q5SXR6	Q5SXR6	CLH1	Cltc
Q9QYB1	CLIC4	CLIC4	Clic4
Q9Z0H8	CLIP2	CLIP2	Clip2
Q8R4N0	CLYBL	CLYBL	Clybl
Q3U5Q7	CMPK2	CMPK2	Cmpk2
P16330	CN37	CN37	Cnp
O88507	CNTFR	CNTFR	Cntfr
P12960	CNTN1	CNTN1	Cntn1
Q61330	CNTN2	CNTN2	Cntn2
O54991	CNTP1	CNTP1	Cntnap1
E9QNF7	E9QNF7	CNTP2	Cntnap2
P18760	COF1	COF1	Cfl1
Q8BMS4	COQ3	COQ3	Coq3
A0A140LIF0	A0A140LIF0	COQ7	Coq7
F6SFF5	F6SFF5	COQ9	Coq9
O89053	COR1A	COR1A	Coro1a
Q9WUM4	COR1C	COR1C	Coro1c
P00405	COX2	COX2	Mtco2
P00416	COX3	COX3	mt-Co3
P19783	COX41	COX41	Cox4i1
P12787	COX5A	COX5A	Cox5a
Q9D881	Q9D881	COX5B	Cox5b-ps
Q9CPQ1	COX6C	COX6C	Cox6c
P84086	CPLX2	CPLX2	Cplx2
Q3UYN2	Q3UYN2	CPNE6	Cpne6
P52825	CPT2	CPT2	Cpt2
A0A1L1SRG5	A0A1L1SRG5	CRYAB	Cryab
Q60737	CSK21	CSK21	Csnk2a1
Q6P9K8	CSKI1	CSKI1	Caskin1
A0A067XG53	A0A067XG53	CSKP	Cask
G3XA35	G3XA35	CSPG2	Vcan
Q71M36	CSPG5	CSPG5	Cspg5
P97315	CSRP1	CSRP1	Csrp1
A0A0J9YU62	A0A0J9YU62	CTBP1	Ctbp1
E0CXB9	E0CXB9	CTNA2	Ctnna2
Q02248	CTNB1	CTNB1	Ctnnb1
B7ZNF6	B7ZNF6	CTND2	Ctnnd2
P56391	CX6B1	CX6B1	Cox6b1
P48771	CX7A2	CX7A2	Cox7a2
P23242	CXA1	CXA1	Gja1
Q9D0M3	CY1	CY1	Cyc1
P62897	CYC	CYC	Cycs
Q5SQX6	CYFP2	CYFP2	Cyfip2
A0A2I3BRL7	A0A2I3BRL7	D39U1	Sdr39u1
Q8R1Q8	DC1L1	DC1L1	Dync1li1
P48318	DCE1	DCE1	Gad1
A0A0G2JGQ6	A0A0G2JGQ6	DCLK1	Dclk1
D3YX34	D3YX34	DCTN1	Dctn1
Q99KJ8	DCTN2	DCTN2	Dctn2
Q9CWS0	DDAH1	DDAH1	Ddah1
P16381	DDX3L	DDX3L	D1Pas1
Q9CQ62	DECR	DECR	Decr1
Q9R0P5	DEST	DEST	Dstn
Q6NS52	DGKB	DGKB	Dgkb
O70503	DHB12	DHB12	Hsd17b12
P51660	DHB4	DHB4	Hsd17b4
P50171	DHB8	DHB8	Hsd17b8
P26443	DHE3	DHE3	Glud1
A0A0G2JGJ1	A0A0G2JGJ1	DHPR	Qdpr
Q99L04	DHRS1	DHRS1	Dhrs1
A0A2I3BRG8	A0A2I3BRG8	DHRS4	Dhrs4
Q5PR73	DIRA2	DIRA2	Diras2
Q5U458	DJC11	DJC11	Dnajc11
O08749	DLDH	DLDH	Dld
D3Z3B8	D3Z3B8	DLG1	Dlg1
A0A338P6J0	A0A338P6J0	DLG2	Dlg2
A2BEE9	A2BEE9	DLG3	Dlg3
A0A338P6E5	A0A338P6E5	DLG4	Dlg4
D3Z709	D3Z709	DLGP1	Dlgap1
Q0VF59	Q0VF59	DLGP2	Dlgap2
B1AS06	B1AS06	DLGP3	Dlgap3
B1AZP2	DLGP4	DLGP4	Dlgap4
Q8BPN8	DMXL2	DMXL2	Dmxl2
P63037	DNJA1	DNJA1	Dnaja1
Q9QYJ0	DNJA2	DNJA2	Dnaja2
A2AUE1	A2AUE1	DNJC5	Dnajc5
Q8K1M6	DNM1L	DNM1L	Dnm1l
Q6NXK7	DPP10	DPP10	Dpp10
Q5U4C2	Q5U4C2	DPP6	Dpp6
Q6P1J1	Q6P1J1	DPYL1	Crmp1
O08553	DPYL2	DPYL2	Dpysl2
A0A0R4J1N0	A0A0R4J1N0	DPYL4	Dpysl4
Q9EQF6	DPYL5	DPYL5	Dpysl5
A0A0R4J1E3	A0A0R4J1E3	DREB	Dbn1
Z4YKT6	Z4YKT6	DRS7B	Dhrs7b
Q9JHU4	DYHC1	DYHC1	Dync1h1
P63168	DYL1	DYL1	Dynll1
F6RRH9	F6RRH9	DYN1	Dnm1
E9QLL2	E9QLL2	DYN3	Dnm3
A2AUK5	A2AUK5	E41L1	Epb41l1
O70318	E41L2	E41L2	Epb41l2
D0VYV6	D0VYV6	E41L3	Epb41l3
E9PX29	E9PX29	E9PX29	Sptbn4
P56564	EAA1	EAA1	Slc1a3
P43006	EAA2	EAA2	Slc1a2
Q8BMS1	ECHA	ECHA	Hadha
Q99JY0	ECHB	ECHB	Hadhb
Q8BH95	ECHM	ECHM	Echs1
P42125	ECI1	ECI1	Eci1
P10126	EF1A1	EF1A1	Eef1a1
P62631	EF1A2	EF1A2	Eef1a2
Q9D8N0	EF1G	EF1G	Eef1g
P58252	EF2	EF2	Eef2
Q8K0D5	EFGM	EFGM	Gfm1
A0A1W2P7T9	A0A1W2P7T9	EFR3B	Efr3b
Q8BFR5	EFTU	EFTU	Tufm
Q9WVK4	EHD1	EHD1	Ehd1
Q8C522	ENDD1	ENDD1	Endod1
P17182	ENOA	ENOA	Eno1
D3Z6E4	D3Z6E4	ENOG	Eno2
P08113	ENPL	ENPL	Hsp90b1
O55026	ENTP2	ENTP2	Entpd2
A0A1D5RLS1	A0A1D5RLS1	EP15R	Eps15l1
Q6PH08	ERC2	ERC2	Erc2
Q8BFZ9	ERLN2	ERLN2	Erlin2
Q5EBJ4	ERMIN	ERMIN	Ermn
P57759	ERP29	ERP29	Erp29
Q99LC5	ETFA	ETFA	Etfa
Q9DCW4	ETFB	ETFB	Etfb
Q6PF96	Q6PF96	ETFD	Etfdh
Q9DCM0	ETHE1	ETHE1	Ethe1
Q8C163	EXOG	EXOG	Exog
Q9D6U8	F162A	F162A	Fam162a
F7BJK1	F7BJK1	F7BJK1	Pcdh1
Q05816	FABP5	FABP5	Fabp5
P11404	FABPH	FABPH	Fabp3
A0A0R4J094	A0A0R4J094	FAHD2	Fahd2a
F8VPU2	FARP1	FARP1	Farp1
A0A0U1RNJ1	A0A0U1RNJ1	FAS	Fasn
Q80UW2	FBX2	FBX2	Fbxo2
Q6NS60	FBX41	FBX41	Fbxo41
G3X9U9	G3X9U9	FIS1	Fis1
P26883	FKB1A	FKB1A	Fkbp1a
O08917	FLOT1	FLOT1	Flot1
Q5SS83	Q5SS83	FLOT2	Flot2
Q61553	FSCN1	FSCN1	Fscn1
P97807	FUMH	FUMH	Fh
Q9D6K8	FUND2	FUND2	Fundc2
A0A0A0MQF6	A0A0A0MQF6	G3P	Gapdh
G5E8G3	G5E8G3	G5E8G3	Opcml
P06745	G6PI	G6PI	Gpi
Q9WV18	GABR1	GABR1	Gabbr1
Q80T41	GABR2	GABR2	Gabbr2
P61922	GABT	GABT	Abat
Q9D172	GAL3A	GAL3A	Gatd3
Q9CZD3	GARS	GARS	Gars1
P62874	GBB1	GBB1	Gnb1
P62880	GBB2	GBB2	Gnb2
P29387	GBB4	GBB4	Gnb4
A0A0N4SVT3	A0A0N4SVT3	GBG12	Gng12
P63213	GBG2	GBG2	Gng2
P62812	GBRA1	GBRA1	Gabra1
P50571	GBRB1	GBRB1	Gabrb1
P63137	GBRB2	GBRB2	Gabrb2
F6ZYH6	F6ZYH6	GBRB3	Gabrb3
A0A0A0MQ68	A0A0A0MQ68	GCDH	Gcdh
Q3USC7	Q3USC7	GD1L1	Gdap1l1
O88741	GDAP1	GDAP1	Gdap1
P50396	GDIA	GDIA	Gdi1
Q61598	GDIB	GDIB	Gdi2
Q99PT1	GDIR1	GDIR1	Arhgdia
E9Q912	GDS1	GDS1	Rap1gds1
A0JNY3	A0JNY3	GEPH	Gphn
P03995	GFAP	GFAP	Gfap
E9Q6M6	E9Q6M6	GHC1	Slc25a22
Q9DB41	GHC2	GHC2	Slc25a18
Q5F258	Q5F258	GIT1	Git1
P15105	GLNA	GLNA	Glul
E9Q197	E9Q197	GLOD4	Glod4
Q64516	GLPK	GLPK	Gk
Q80Y14	GLRX5	GLRX5	Glrx5
D3Z7P3	GLSK	GLSK	Gls
O08795	GLU2B	GLU2B	Prkcsh
Q9CZN7	GLYM	GLYM	Shmt2
P21278	GNA11	GNA11	Gna11
P27601	GNA13	GNA13	Gna13
B2RSH2	GNAI1	GNAI1	Gnai1
P08752	GNAI2	GNAI2	Gnai2
Q8CGK7	GNAL	GNAL	Gnal
P18872	GNAO	GNAO	Gnao1
P21279	GNAQ	GNAQ	Gnaq
P63094	GNAS2	GNAS2	Gnas
O70443	GNAZ	GNAZ	Gnaz
P62881	GNB5	GNB5	Gnb5
Q8C419	GP158	GP158	Gpr158
Q3ULJ0	GPD1L	GPD1L	Gpd1l
E0CXN5	E0CXN5	GPDA	Gpd1
Q64521	GPDM	GPDM	Gpd2
P35802	GPM6A	GPM6A	Gpm6a
A2AEG6	A2AEG6	GPM6B	Gpm6b
O70325	GPX4	GPX4	Gpx4
Q7TNB5	Q7TNB5	GRIA1	Gria1
P23819	GRIA2	GRIA2	Gria2
B0QZW1	B0QZW1	GRIA3	Gria3
Q61625	GRID2	GRID2	Grid2
Q3UNH4	GRIN1	GRIN1	Gprin1
P97772	GRM1	GRM1	Grm1
A0A0J9YVF0	A0A0J9YVF0	GRM2	Grm2
Q9QYS2	GRM3	GRM3	Grm3
Q3UVX5	GRM5	GRM5	Grm5
P38647	GRP75	GRP75	Hspa9
A2AE89	A2AE89	GSTM1	Gstm1
P19157	GSTP1	GSTP1	Gstp1
P17809	GTR1	GTR1	Slc2a1
P32037	GTR3	GTR3	Slc2a3
A0A494B982	A0A494B982	GUAD	Gda
P43274	H14	H14	H1-4
A0A0N4SV66	A0A0N4SV66	H2AJ	H2aj
Q6ZWY9	H2B1C	H2B1C	H2bc8
A0A1W2P768	A0A1W2P768	H32	H3c14
P62806	H4	H4	H4c16
Q8K2C9	HACD3	HACD3	Hacd3
Q91VB8	Q91VB8	HBA	Hba-a1
A8DUK4	A8DUK4	HBB1	Hbb-b1
A2AFQ2	A2AFQ2	HCD2	Hsd17b10
Q61425	HCDH	HCDH	Hadh
Q640R3	HECAM	HECAM	Hepacam
A0A494BAI5	A0A494BAI5	HEMH	Fech
E0CX19	E0CX19	HIBCH	Hibch
Q9D0S9	HINT2	HINT2	Hint2
Q9CPS6	HINT3	HINT3	Hint3
P38060	HMGCL	HMGCL	Hmgcl
D3YX62	D3YX62	HMOX2	Hmox2
B2M1R6	B2M1R6	HNRPK	Hnrnpk
Q9Z2Y3	HOME1	HOME1	Homer1
A0A140LHR9	A0A140LHR9	HOME2	Homer2
Q99JP6	HOME3	HOME3	Homer3
E9PV73	E9PV73	HPCA	Hpca
P62748	HPCL1	HPCL1	Hpcal1
Q9QUP5	HPLN1	HPLN1	Hapln1
Q9ESM3	HPLN2	HPLN2	Hapln2
E9Q0U7	E9Q0U7	HS105	Hsph1
Q8K0U4	HS12A	HS12A	Hspa12a
P48722	HS74L	HS74L	Hspa4l
P07901	HS90A	HS90A	Hsp90aa1
P11499	HS90B	HS90B	Hsp90ab1
Q8BTX9	HSDL1	HSDL1	Hsdl1
Q3U2G2	Q3U2G2	HSP74	Hspa4
P63017	HSP7C	HSP7C	Hspa8
G3UVV4	G3UVV4	HXK1	Hk1
Q9JKR6	HYOU1	HYOU1	Hyou1
I3ITR1	I3ITR1	I3ITR1	AK157302
Q60625	ICAM5	ICAM5	Icam5
A0A1L1STE6	A0A1L1STE6	IDH3A	Idh3a
P70404	IDHG1	IDHG1	Idh3g
P54071	IDHP	IDHP	Idh2
Q6ZWX6	IF2A	IF2A	Eif2s1
A0A0A0MQM0	A0A0A0MQM0	IF5A1	Eif5a
A0A0R4J117	A0A0R4J117	IGSF8	Igsf8
P70168	IMB1	IMB1	Kpnb1
Q80ZJ2	Q80ZJ2	IMPA1	Impa1
A0A0R4J0Q2	A0A0R4J0Q2	INP4A	Inpp4a
D3Z636	D3Z636	IPYR2	Ppa2
A0A1D5RM83	A0A1D5RM83	IQEC1	Iqsec1
P85094	ISC2A	ISC2A	Isoc2a
A0A1Y7VK19	A0A1Y7VK19	ISCA2	Isca2
P11881	ITPR1	ITPR1	Itpr1
Q9JHI5	IVD	IVD	Ivd
P04104	K2C1	K2C1	Krt1
Q9R0Y5	KAD1	KAD1	Ak1
Q9WTP7	KAD3	KAD3	Ak3
A2ARF6	A2ARF6	KAD4	Ak4
A0A0A6YX73	A0A0A6YX73	KAP2	Prkar2a
P31324	KAP3	KAP3	Prkar2b
Q9JMK2	KC1E	KC1E	Csnk1e
A0A571BE49	A0A571BE49	KCAB2	Kcnab2
P11798	KCC2A	KCC2A	Camk2a
Q5SVJ0	Q5SVJ0	KCC2B	Camk2b
A0A0G2JGS4	A0A0G2JGS4	KCC2D	Camk2d
A0A2I3BQP6	A0A2I3BQP6	KCC2G	Camk2g
Q9JM63	KCJ10	KCJ10	Kcnj10
A0A087WQ41	A0A087WQ41	KCMA1	Kcnma1
P63141	KCNA2	KCNA2	Kcna2
Q04447	KCRB	KCRB	Ckb
P30275	KCRU	KCRU	Ckmt1
A0A0R4J093	A0A0R4J093	KCY	Cmpk1
Q9CQX8	KGD4	KGD4	Mrps36
E0CZ72	E0CZ72	KIF2A	Kif2a
Q61768	KINH	KINH	Kif5b
P68404	KPCB	KPCB	Prkcb
P63318	KPCG	KPCG	Prkcg
P52480	KPYM	KPYM	Pkm
A2AFG7	A2AFG7	L1CAM	L1cam
Q9EP89	LACTB	LACTB	Lactb
P11438	LAMP1	LAMP1	Lamp1
F6RJV6	F6RJV6	LANC2	Lancl2
Q61792	LASP1	LASP1	Lasp1
Q9Z127	LAT1	LAT1	Slc7a5
A0A1B0GSX0	A0A1B0GSX0	LDHA	Ldha
A0A6I8MX27	A0A6I8MX27	LDHB	Ldhb
Q9Z2I0	LETM1	LETM1	Letm1
Q9JIA1	LGI1	LGI1	Lgi1
Q8K406	LGI3	LGI3	Lgi3
A9DA50	A9DA50	LIGO1	Lingo1
Q8JZS0	LIN7A	LIN7A	Lin7a
P60469	LIPA3	LIPA3	Ppfia3
P63005	LIS1	LIS1	Pafah1b1
Q9DC07	LNEBL	LNEBL	Nebl
Q8CGK3	LONM	LONM	Lonp1
Q6PB66	LPPRC	LPPRC	Lrpprc
A2AKH7	A2AKH7	LRC57	Lrrc57
A0A0R4J0I9	A0A0R4J0I9	LRP1	Lrp1
A0A0G2JDT9	A0A0G2JDT9	LRRC7	Lrrc7
A0A087WP70	A0A087WP70	LSAMP	Lsamp
Q924L1	LTMD1	LTMD1	Letmd1
Q8K356	Q8K356	LY6H	Ly6h
F6QHD1	F6QHD1	LYRIC	Mtdh
Q9CR62	M2OM	M2OM	Slc25a11
A0A0A6YVZ8	A0A0A6YVZ8	M4K4	Map4k4
A0A1Y7VJZ2	A0A1Y7VJZ2	MAAI	Gstz1
Q922B1	MACD1	MACD1	Macrod1
E9QNP1	E9QNP1	MACF1	Macf1
Q3ZB60	Q3ZB60	MAG	Mag
Q8BI08	MAL2	MAL2	Mal2
Q99KE1	MAOM	MAOM	Me2
Q8BMF3	MAON	MAON	Me3
A2ARP8	A2ARP8	MAP1A	Map1a
P14873	MAP1B	MAP1B	Map1b
A0A0G2JDN7	A0A0G2JDN7	MAP4	Map4
Q7TSJ2	MAP6	MAP6	Map6
Q922Q1	MARC2	MARC2	Mtarc2
P26645	MARCS	MARCS	Marcks
Q6PER3	MARE3	MARE3	Mapre3
A0A0R4J1H0	A0A0R4J1H0	MARH5	Marchf5
A0A0R4J0B1	A0A0R4J0B1	MARK2	Mark2
Q8BL86	MBLC2	MBLC2	Mblac2
A0A498WGS3	A0A498WGS3	MBP	Mbp
Q9Z2Z6	MCAT	MCAT	Slc25a20
Q99MR8	MCCA	MCCA	Mccc1
Q3ULD5	MCCB	MCCB	Mccc2
Q3UMR5	MCU	MCU	Mcu
A0A5F8MPN8	A0A5F8MPN8	MDHC	Mdh1
P08249	MDHM	MDHM	Mdh2
E0CYB9	E0CYB9	MFF	Mff
Q80U63	MFN2	MFN2	Mfn2
Q9CPU4	MGST3	MGST3	Mgst3
Q7TNS2	MIC10	MIC10	Micos10
Q9CRB9	MIC19	MIC19	Chchd3
E9Q4M4	E9Q4M4	MIC25	Chchd6
Q9DCZ4	MIC26	MIC26	Apoo
Q78IK4	MIC27	MIC27	Apool
Q8CAQ8	MIC60	MIC60	Immt
Q9CTY5	MICU3	MICU3	Micu3
P34884	MIF	MIF	Mif
Q8BG51	MIRO1	MIRO1	Rhot1
Q3URS9	MITOK	MITOK	Ccdc51
Q9CXJ4	MITOS	MITOS	Abcb8
P63085	MK01	MK01	Mapk1
Q3THE2	ML12B	ML12B	Myl12b
Q9EQ20	MMSA	MMSA	Aldh6a1
Q3UY21	Q3UY21	MOG	Mog
P31938	MP2K1	MP2K1	Map2k1
D3Z786	D3Z786	MPC1	Mpc1
Q9D023	MPC2	MPC2	Mpc2
G5E902	G5E902	MPCP	Slc25a3
Q9WV34	MPP2	MPP2	Mpp2
A0A668KLC6	A0A668KLC6	MTAP2	Map2
A0A3Q4EBT8	A0A3Q4EBT8	MTCH1	Mtch1
A2AFW6	A2AFW6	MTCH2	Mtch2
A0A6I8MWZ8	A0A6I8MWZ8	MTX1	Mtx1
O88441	MTX2	MTX2	Mtx2
P16332	MUTA	MUTA	Mmut
B2RRE2	B2RRE2	MY18A	Myo18a
Q5SV64	Q5SV64	MYH10	Myh10
K3W4R2	K3W4R2	MYH14	Myh14
A0A1W2P6F6	A0A1W2P6F6	MYL6	Myl6
D3YZ62	D3YZ62	MYO5A	Myo5a
P60202	MYPR	MYPR	Plp1
A0A3Q4EBU5	A0A3Q4EBU5	NAC1	Slc8a1
Q8K596	NAC2	NAC2	Slc8a2
Q8C5H8	NAKD2	NAKD2	Nadk2
Q9DB73	NB5R1	NB5R1	Cyb5r1
F2Z456	F2Z456	NB5R3	Cyb5r3
E9QB01	E9QB01	NCAM1	Ncam1
O35136	NCAM2	NCAM2	Ncam2
Q9Z0E0	NCDN	NCDN	Ncdn
A2AS98	A2AS98	NCKP1	Nckap1
E9PZF0	E9PZF0	NDKA	Nme1
Q62433	NDRG1	NDRG1	Ndrg1
Q9QYG0	NDRG2	NDRG2	Ndrg2
Q8VCV2	Q8VCV2	NDRG3	Ndrg3
Q9CQ75	NDUA2	NDUA2	Ndufa2
Q9CQ91	NDUA3	NDUA3	Ndufa3
A0A0N4SVQ1	A0A0N4SVQ1	NDUA4	Ndufa4
Q9CPP6	NDUA5	NDUA5	Ndufa5
Q9CQZ5	NDUA6	NDUA6	Ndufa6
Q9Z1P6	NDUA7	NDUA7	Ndufa7
Q9DCJ5	NDUA8	NDUA8	Ndufa8
A0A0R3P9C8	A0A0R3P9C8	NDUA9	Ndufa9
Q99LC3	NDUAA	NDUAA	Ndufa10
G5E814	G5E814	NDUAB	Ndufa11
Q7TMF3	NDUAC	NDUAC	Ndufa12
Q9ERS2	NDUAD	NDUAD	Ndufa13
Q9CQC7	NDUB4	NDUB4	Ndufb4
D3Z568	D3Z568	NDUB5	Ndufb5
A2AP32	A2AP32	NDUB6	Ndufb6
Q9CR61	NDUB7	NDUB7	Ndufb7
Q9D6J5	NDUB8	NDUB8	Ndufb8
Q9CQJ8	NDUB9	NDUB9	Ndufb9
Q9DCS9	NDUBA	NDUBA	Ndufb10
O09111	NDUBB	NDUBB	Ndufb11
Q9CQ54	NDUC2	NDUC2	Ndufc2
Q91VD9	NDUS1	NDUS1	Ndufs1
Q91WD5	NDUS2	NDUS2	Ndufs2
Q9DCT2	NDUS3	NDUS3	Ndufs3
E9QPX3	E9QPX3	NDUS4	Ndufs4
B1ARW4	B1ARW4	NDUS5	Ndufs5
P52503	NDUS6	NDUS6	Ndufs6
Q9DC70	NDUS7	NDUS7	Ndufs7
Q8K3J1	NDUS8	NDUS8	Ndufs8
D3YUM1	D3YUM1	NDUV1	Ndufv1
Q9D6J6	NDUV2	NDUV2	Ndufv2
Q8BK30	NDUV3	NDUV3	Ndufv3
Q6R891	NEB2	NEB2	Ppp1r9b
Q9CR95	NECP1	NECP1	Necap1
A0A4W9	A0A4W9	NEGR1	Negr1
P60761	NEUG	NEUG	Nrgn
P06837	NEUM	NEUM	Gap43
Q04690	NF1	NF1	Nf1
Q810U3	NFASC	NFASC	Nfasc
P19246	NFH	NFH	Nefh
P08551	NFL	NFL	Nefl
A0A0R4J036	A0A0R4J036	NFM	Nefm
Q9Z1J3	NFS1	NFS1	Nfs1
P70441	NHRF1	NHRF1	Slc9a3r1
O55125	NIPS1	NIPS1	Nipsnap1
Q7TMG8	Q7TMG8	NIPS2	Nipsnap2
Q69ZK9	NLGN2	NLGN2	Nlgn2
A2AGI2	A2AGI2	NLGN3	Nlgn3
G3X9V4	G3X9V4	NMDE2	Grin2b
A2AI14	A2AI14	NMDZ1	Grin1
J3QMM7	J3QMM7	NNRD	Naxd
A3KGE4	A3KGE4	NOE1	Olfm1
Q9CQE1	NPS3B	NPS3B	Nipsnap3b
P97300	NPTN	NPTN	Nptn
Q62443	NPTX1	NPTX1	Nptx1
E9PZM8	E9PZM8	NPTXR	Nptxr
A0A1W2P7Y9	A0A1W2P7Y9	NRCAM	Nrcam
E0CY11	E0CY11	NRX1A	Nrxn1
P46460	NSF	NSF	Nsf
Q3UHB1	NT5D3	NT5D3	Nt5dc3
D3Z396	D3Z396	NTRI	Ntm
P03888	NU1M	NU1M	Mtnd1
P03921	NU5M	NU5M	Mtnd5
A0A0J9YUB6	A0A0J9YUB6	OCAD1	Ociad1
Q9D8W7	OCAD2	OCAD2	Ociad2
P53395	ODB2	ODB2	Dbt
Q60597	ODO1	ODO1	Ogdh
Q9D2G2	ODO2	ODO2	Dlst
Q8BMF4	ODP2	ODP2	Dlat
P35486	ODPA	ODPA	Pdha1
Q9D051	ODPB	ODPB	Pdhb
Q8BKZ9	ODPX	ODPX	Pdhx
G3XA53	G3XA53	OMGP	Omg
P58281	OPA1	OPA1	Opa1
O54734	OST48	OST48	Ddost
D3YWF6	D3YWF6	OTUB1	Otub1
Q05D16	Q05D16	OX2G	Cd200
Q922Q4	P5CR2	P5CR2	Pycr2
Q9Z110	P5CS	P5CS	Aldh18a1
A0A1L1SVK0	A0A1L1SVK0	PA1B2	Pafah1b2
Q61644	PACN1	PACN1	Pacsin1
Q8K212	PACS1	PACS1	Pacs1
G5E884	G5E884	PAK1	Pak1
Q9Z0P4	PALM	PALM	Palm
Q8BR92	PALM2	PALM2	Palm2
Q9JLB0	PALS2	PALS2	Pals2
A2A813	A2A813	PARK7	Park7
Q91ZA3	PCCA	PCCA	Pcca
Q99MN9	PCCB	PCCB	Pccb
Q9QYX7	PCLO	PCLO	Pclo
Q9QXV0	PCS1N	PCS1N	Pcsk1n
Q9WU78	PDC6I	PDC6I	Pdcd6ip
A0A384DV92	A0A384DV92	PDE10	Pde10a
A0A1B0GRJ9	A0A1B0GRJ9	PDE2A	Pde2a
P09103	PDIA1	PDIA1	P4hb
P27773	PDIA3	PDIA3	Pdia3
Q3TML0	Q3TML0	PDIA6	Pdia6
Q8BFP9	PDK1	PDK1	Pdk1
Q9JK42	PDK2	PDK2	Pdk2
Q922H2	PDK3	PDK3	Pdk3
A2AJP9	A2AJP9	PDP1	Pdp1
Q8K183	PDXK	PDXK	Pdxk
Q62048	PEA15	PEA15	Pea15
D3Z1V4	D3Z1V4	PEBP1	Pebp1
P12382	PFKAL	PFKAL	Pfkl
P47857	PFKAM	PFKAM	Pfkm
Q8C605	Q8C605	PFKAP	Pfkp
Q9DBJ1	PGAM1	PGAM1	Pgam1
Q61361	PGCB	PGCB	Bcan
Q8BWM0	PGES2	PGES2	Ptges2
P09411	PGK1	PGK1	Pgk1
A2CEK3	A2CEK3	PGM1	Pgm1
P67778	PHB1	PHB1	Phb1
O35129	PHB2	PHB2	Phb2
Q80TL4	PHF24	PHF24	Phf24
O70172	PI42A	PI42A	Pip4k2a
A0A140T8I9	A0A140T8I9	PI4KA	Pi4ka
F8WHW6	F8WHW6	PI51C	Pip5k1c
E0CYV0	E0CYV0	PIMT	Pcmt1
A2AS45	A2AS45	PKP4	Pkp4
Q9Z1B3	PLCB1	PLCB1	Plcb1
O35405	PLD3	PLD3	Pld3
Q9QXS1	PLEC	PLEC	Plec
Q99JY8	PLPP3	PLPP3	Plpp3
A0A0G2JGY9	A0A0G2JGY9	PLPR4	Plppr4
P62137	PP1A	PP1A	Ppp1ca
P62715	PP2AB	PP2AB	Ppp2cb
P63328	PP2BA	PP2BA	Ppp3ca
P17742	PPIA	PPIA	Ppia
P24369	PPIB	PPIB	Ppib
Q3UYC0	PPM1H	PPM1H	Ppm1h
P35700	PRDX1	PRDX1	Prdx1
Q61171	PRDX2	PRDX2	Prdx2
P20108	PRDX3	PRDX3	Prdx3
P99029	PRDX5	PRDX5	Prdx5
Q6GT24	Q6GT24	PRDX6	Prdx6
Q8K411	PREP	PREP	Pitrm1
Q9WU79	PROD	PROD	Prodh
P62962	PROF1	PROF1	Pfn1
D3YWS3	D3YWS3	PROF2	Pfn2
E9PUL5	PRRT2	PRRT2	Prrt2
P32848	PRVA	PRVA	Pvalb
Q11011	PSA	PSA	Npepps
Q9Z2U1	PSA5	PSA5	Psma5
E9PUC5	E9PUC5	PSD3	Psd3
Q14C51	PTCD3	PTCD3	Ptcd3
Q8BGC4	PTGR3	PTGR3	Ptgr3
P80560	PTPR2	PTPR2	Ptprn2
A0A0J9YVD2	A0A0J9YVD2	PTPRZ	Ptprz1
P42669	PURA	PURA	Pura
Q3U125	Q3U125	PXL2A	Prxl2a
G5E8R3	G5E8R3	PYC	Pcx
Q8CI94	PYGB	PYGB	Pygb
E9PUM3	E9PUM3	PYGM	Pygm
Q0VF55	Q0VF55	Q0VF55	Atp2b3
Q68FG2	Q68FG2	Q68FG2	Sptbn2
Q9CZ13	QCR1	QCR1	Uqcrc1
Q9CPX8	QCR10	QCR10	Uqcr11
Q9DB77	QCR2	QCR2	Uqcrc2
P99028	QCR6	QCR6	Uqcrh
Q9CQB4	Q9CQB4	QCR7	Uqcrb
Q9CQ69	QCR8	QCR8	Uqcrq
Q8R1I1	QCR9	QCR9	Uqcr10
P61027	RAB10	RAB10	Rab10
Q91V41	RAB14	RAB14	Rab14
A0A3Q4EI12	A0A3Q4EI12	RAB18	Rab18
P62821	RAB1A	RAB1A	Rab1A
A0A494B945	A0A494B945	RAB1B	Rab1b
P35282	RAB21	RAB21	Rab21
P53994	RAB2A	RAB2A	Rab2a
Q6PHN9	RAB35	RAB35	Rab35
P63011	RAB3A	RAB3A	Rab3a
A0A286YDR2	A0A286YDR2	RAB3C	Rab3c
P61021	RAB5B	RAB5B	Rab5b
Q8C266	Q8C266	RAB5C	Rab5c
P35279	RAB6A	RAB6A	Rab6a
P51150	RAB7A	RAB7A	Rab7a
P61028	RAB8B	RAB8B	Rab8b
Q3TLP8	Q3TLP8	RAC1	Rac1
A0A5F8MPB9	A0A5F8MPB9	RADI	Rdx
P63321	RALA	RALA	Rala
P62835	RAP1A	RAP1A	Rap1a
P61226	RAP2B	RAP2B	Rap2b
Q61411	RASH	RASH	Hras
G3UZD3	G3UZD3	RB11B	Rab11b
O35963	RB33B	RB33B	Rab33b
Q9ERI6	RDH14	RDH14	Rdh14
G3X8R0	G3X8R0	REEP5	Reep5
Q80XD3	Q80XD3	RGS7	Rgs7
Q921J2	RHEB	RHEB	Rheb
A0A0A0MQE8	A0A0A0MQE8	RHG21	Arhgap21
A0A0A6YXF6	A0A0A6YXF6	RHOA	Rhoa
P62746	RHOB	RHOB	Rhob
P52760	RIDA	RIDA	Rida
A0A0G2JFB0	A0A0G2JFB0	RIMB2	Rimbp2
F6TZK4	F6TZK4	RIMS1	Rims1
A0A3B2WBL1	A0A3B2WBL1	RL10A	Rpl10a
A2BH06	A2BH06	RL11	Rpl11
P35979	RL12	RL12	Rpl12
P47963	RL13	RL13	Rpl13
Q9CR57	RL14	RL14	Rpl14
Q6ZWZ7	Q6ZWZ7	RL17	Rpl17
A0A1B0GQU8	A0A1B0GQU8	RL18	Rpl18
A2A547	A2A547	RL19	Rpl19
P67984	RL22	RL22	Rpl22
P61358	RL27	RL27	Rpl27
P14115	RL27A	RL27A	Rpl27a
P27659	RL3	RL3	Rpl3
P62911	RL32	RL32	Rpl32
D3YYV8	D3YYV8	RL5	Rpl5
F6XI62	F6XI62	RL7	Rpl7
P12970	RL7A	RL7A	Rpl7a
P62918	RL8	RL8	Rpl8
P14869	RLA0	RLA0	Rplp0
P47955	RLA1	RLA1	Rplp1
P99027	RLA2	RLA2	Rplp2
Q9DB15	RM12	RM12	Mrpl12
Q8CI78	RMND1	RMND1	Rmnd1
A0A1Y7VMN0	A0A1Y7VMN0	ROCK2	Rock2
P47708	RP3A	RP3A	Rph3a
Q9EQZ6	RPGF4	RPGF4	Rapgef4
Q91YQ5	RPN1	RPN1	Rpn1
A2ACG7	A2ACG7	RPN2	Rpn2
A0A1W2P7A1	A0A1W2P7A1	RS12	Rps12
D3YUG3	D3YUG3	RS19	Rps19
D3YVC1	D3YVC1	RS2	Rps2
A0A140LI77	A0A140LI77	RS3	Rps3
P97351	RS3A	RS3A	Rps3a
P62702	RS4X	RS4X	Rps4x
Q91V55	Q91V55	RS5	Rps5
P62754	RS6	RS6	Rps6
P62242	RS8	RS8	Rps8
Q9CXW2	RT22	RT22	Mrps22
Q8K0T0	RTN1	RTN1	Rtn1
Q9ES97	RTN3	RTN3	Rtn3
Q99P72	RTN4	RTN4	Rtn4
Q9D394	RUFY3	RUFY3	Rufy3
P50114	S100B	S100B	S100b
A0A076FR46	A0A076FR46	S12A5	Slc12a5
Q8BH59	S2512	S2512	Slc25a12
A2AKW0	A2AKW0	S2551	Slc25a51
Q91VE0	S27A4	S27A4	Slc27a4
A0A0A6YWF5	A0A0A6YWF5	S38A3	Slc38a3
Q5DTL9	S4A10	S4A10	Slc4a10
E9Q8N8	E9Q8N8	S4A4	Slc4a4
P31650	S6A11	S6A11	Slc6a11
A0A0R4J087	A0A0R4J087	S6A17	Slc6a17
A0A5F8MPK9	A0A5F8MPK9	SAC1	Sacm1l
Q80SW1	SAHH2	SAHH2	Ahcyl1
F8WGT1	F8WGT1	SAHH3	Ahcyl2
Q8BGH2	SAM50	SAM50	Samm50
O35874	SATT	SATT	Slc1a4
P31648	SC6A1	SC6A1	Slc6a1
B2RQX9	B2RQX9	SC6A5	Slc6a5
E9Q3V0	E9Q3V0	SC6A9	Slc6a9
Q8C8N2	SCAI	SCAI	Scai
Q3TSA8	Q3TSA8	SCAM1	Scamp1
Q3UXS0	Q3UXS0	SCAM3	Scamp3
Q9JKD3	SCAM5	SCAM5	Scamp5
A2ASZ8	SCMC2	SCMC2	Slc25a25
Q6GQS1	SCMC3	SCMC3	Slc25a23
A0A5H1ZRM8	A0A5H1ZRM8	SCN2A	Scn2a
Q3UJQ9	Q3UJQ9	SCOT1	Oxct1
P32020	SCP2	SCP2	Scp2
Q8R127	SCPDL	SCPDL	Sccpdh
Q9CZC8	SCRN1	SCRN1	Scrn1
Q8K2B3	SDHA	SDHA	Sdha
Q9CQA3	SDHB	SDHB	Sdhb
A0A0J9YTY0	A0A0J9YTY0	SEPT11	Septin11
D3YYB1	D3YYB1	SEPT2	Septin2
A0A2R8W6V9	A0A2R8W6V9	SEPT3	Septin3
A0A5F8MP96	A0A5F8MP96	SEPT4	Septin4
A0A338P6R8	A0A338P6R8	SEPT5	Septin5
Q9R1T4	SEPT6	SEPT6	Septin6
E9Q1G8	E9Q1G8	SEPT7	Septin7
B1AQY9	B1AQY9	SEPT8	Septin8
A2A6U3	A2A6U3	SEPT9	Septin9
Q61753	SERA	SERA	Phgdh
Q99K85	SERC	SERC	Psat1
Q99JR1	SFXN1	SFXN1	Sfxn1
Q3U4F0	Q3U4F0	SFXN3	Sfxn3
Q8BRQ9	Q8BRQ9	SFXN5	Sfxn5
F7CPX0	F7CPX0	SGIP1	Sgip1
A2ALV3	A2ALV3	SH3G2	Sh3gl2
D3YZU1	SHAN1	SHAN1	Shank1
D3Z5K8	D3Z5K8	SHAN2	Shank2
Q4ACU6	SHAN3	SHAN3	Shank3
A2AWI7	A2AWI7	SHLB2	Sh3glb2
P97797	SHPS1	SHPS1	Sirpa
Q8C3Q5	SHSA7	SHSA7	Shisa7
A0A140LHL5	A0A140LHL5	SIR2	Sirt2
Q9WTX5	SKP1	SKP1	Skp1
A2AQ25	SKT	SKT	Skt
Q9DB05	SNAA	SNAA	Napa
P28663	SNAB	SNAB	Napb
D3Z4B2	D3Z4B2	SNAG	Napg
O55100	SNG1	SNG1	Syngr1
Q8R191	SNG3	SNG3	Syngr3
P60879	SNP25	SNP25	Snap25
Q80U23	SNPH	SNPH	Snph
P08228	SODC	SODC	Sod1
P09671	SODM	SODM	Sod2
Q6NZL0	SOGA3	SOGA3	Soga3
G3UXX3	G3UXX3	SPRE	Spr
E9Q397	E9Q397	SPTB1	Sptb
Q62261	SPTB2	SPTB2	Sptbn1
A3KGU7	A3KGU7	SPTN1	Sptan1
Q9R112	SQOR	SQOR	Sqor
A0A286YCI8	A0A286YCI8	SRBS1	Sorbs1
A0A0R4J1T1	A0A0R4J1T1	SRBS2	Sorbs2
A0A571BDG0	A0A571BDG0	SRCN1	Srcin1
F8VPQ4	F8VPQ4	SRGP3	Srgap3
Q8BWF0	SSDH	SSDH	Aldh5a1
Q60864	STIP1	STIP1	Stip1
Q99JB2	STML2	STML2	Stoml2
D3Z1Z8	D3Z1Z8	STMN1	Stmn1
Q9ER00	STX12	STX12	Stx12
O35526	STX1A	STX1A	Stx1a
P61264	STX1B	STX1B	Stx1b
O08599	STXB1	STXB1	Stxbp1
D3Z079	D3Z079	STXB5	Stxbp5
Q9WUM5	SUCA	SUCA	Suclg1
Q9Z2I9	SUCB1	SUCB1	Sucla2
Q9Z2I8	SUCB2	SUCB2	Suclg2
Q9JIS5	SV2A	SV2A	Sv2a
Q8BG39	SV2B	SV2B	Sv2b
A0A0A6YVS6	A0A0A6YVS6	SYGP1	Syngap1
Q8BIJ6	SYIM	SYIM	Iars2
O88935	SYN1	SYN1	Syn1
Q64332	SYN2	SYN2	Syn2
D3Z656	D3Z656	SYNJ1	Synj1
Q8CC35	SYNPO	SYNPO	Synpo
Q62277	SYPH	SYPH	Syp
Q9JJL8	SYSM	SYSM	Sars2
P46096	SYT1	SYT1	Syt1
A0A0R4J2C2	A0A0R4J2C2	SYT2	Syt2
O55042	SYUA	SYUA	Snca
Q91ZZ3	SYUB	SYUB	Sncb
Q9R1Q8	TAGL3	TAGL3	Tagln3
B1AQW2	B1AQW2	TAU	Mapt
P68369	TBA1A	TBA1A	Tuba1a
A0A0A0MQA5	A0A0A0MQA5	TBA4A	Tuba4a
Q9ERD7	TBB3	TBB3	Tubb3
Q9D6F9	TBB4A	TBB4A	Tubb4a
P68372	TBB4B	TBB4B	Tubb4b
P99024	TBB5	TBB5	Tubb5
P11983	TCPA	TCPA	Tcp1
P80314	TCPB	TCPB	Cct2
G5E839	G5E839	TCPD	Cct4
P80316	TCPE	TCPE	Cct5
E9Q133	E9Q133	TCPG	Cct3
P80313	TCPH	TCPH	Cct7
H3BJB6	H3BJB6	TCPQ	Cct8
Q52KG9	Q52KG9	TCPZ	Cct6a
A0A0G2JE08	A0A0G2JE08	TDRKH	Tdrkh
A0A0A0MQ92	A0A0A0MQ92	TEN2	Tenm2
Q8BYI9	TENR	TENR	Tnr
Q01853	TERA	TERA	Vcp
Q3UUI3	THEM4	THEM4	Them4
H3BKL5	H3BKL5	THIKA	Acaa1a
Q8QZT1	THIL	THIL	Acat1
Q8BWT1	THIM	THIM	Acaa2
P10639	THIO	THIO	Txn
Q8BH55	THNS1	THNS1	Thnsl1
Q99J99	THTM	THTM	Mpst
P52196	THTR	THTR	Tst
A0A1L1SUX8	A0A1L1SUX8	THY1	Thy1
P62073	TIM10	TIM10	Timm10
Q9CQ85	TIM22	TIM22	Timm22
O35857	TIM44	TIM44	Timm44
Q9D880	TIM50	TIM50	Timm50
Q9WV98	TIM9	TIM9	Timm9
P40142	TKT	TKT	Tkt
Q9CR76	TM186	TM186	Tmem186
D3YXS8	D3YXS8	TM40L	Tomm40l
Q9D1D4	TMEDA	TMEDA	Tmed10
Q8BK08	TMM11	TMM11	Tmem11
Q4VAE3	TMM65	TMM65	Tmem65
Q9JKK7	TMOD2	TMOD2	Tmod2
D3Z2J6	D3Z2J6	TMX2	Tmx2
Q9CPQ3	TOM22	TOM22	Tomm22
Q9CZW5	TOM70	TOM70	Tomm70
A2AUD5	A2AUD5	TPD54	Tpd52l2
P17751	TPIS	TPIS	Tpi1
E9Q455	E9Q455	TPM1	Tpm1
E9Q7Q3	E9Q7Q3	TPM3	Tpm3
Q7TQD2	TPPP	TPPP	Tppp
Q9CRB6	TPPP3	TPPP3	Tppp3
Q9CQN1	TRAP1	TRAP1	Trap1
Q9D3A9	TTYH1	TTYH1	Ttyh1
Q8JZU2	TXTP	TXTP	Slc25a1
Q02053	UBA1	UBA1	Uba1
P61089	UBE2N	UBE2N	Ube2n
Q3U4W8	Q3U4W8	UBP5	Usp5
Q9R0P9	UCHL1	UCHL1	Uchl1
Q9CR68	UCRI	UCRI	Uqcrfs1
A6PWX9	A6PWX9	UQCC1	Uqcc1
P51863	VA0D1	VA0D1	Atp6v0d1
A0A0N4SUV3	A0A0N4SUV3	VAMP1	Vamp1
B0QZN5	B0QZN5	VAMP2	Vamp2
Q9WV55	VAPA	VAPA	Vapa
Q8BH80	Q8BH80	VAPB	Vapb
Q62465	VAT1	VAT1	Vat1
P50516	VATA	VATA	Atp6v1a
P62814	VATB2	VATB2	Atp6v1b2
Q9Z1G3	VATC1	VATC1	Atp6v1c1
P57746	VATD	VATD	Atp6v1d
P50518	VATE1	VATE1	Atp6v1e1
Q9WTT4	VATG2	VATG2	Atp6v1g2
A0A0A6YWP6	A0A0A6YWP6	VATH	Atp6v1h
Q60932	VDAC1	VDAC1	Vdac1
G3UX26	G3UX26	VDAC2	Vdac2
J3QMG3	J3QMG3	VDAC3	Vdac3
A0A1B0GRU0	A0A1B0GRU0	VGLU1	Slc17a7
O35633	VIAAT	VIAAT	Slc32a1
P20152	VIME	VIME	Vim
P62761	VISL1	VISL1	Vsnl1
K3W4T3	K3W4T3	VPP1	Atp6v0a1
Q9EQH3	VPS35	VPS35	Vps35
Q8CC88	VWA8	VWA8	Vwa8
Q8VHI6	WASF3	WASF3	Wasf3
O88342	WDR1	WDR1	Wdr1
Q920I9	WDR7	WDR7	Wdr7
Q9CQW1	YKT6	YKT6	Ykt6

## Sheet: WT - 18M
WT 18 Month Lipofuscin Proteome (n = 1855)
UniProt Accession	SWISSPROT Accession	UniProt ID	Gene Name
Q9CQV8	1433B	1433B	Ywhab
P62259	1433E	1433E	Ywhae
P68510	1433F	1433F	Ywhah
P61982	1433G	1433G	Ywhag
P68254	1433T	1433T	Ywhaq
P63101	1433Z	1433Z	Ywhaz
Q14AA6	Q14AA6	1700009N14Rik	1700009N14Rik
F6X1P1	F6X1P1	2310061I04Rik	2310061I04Rik
Q3UZJ4	Q3UZJ4	2A5E	Ppp2r5e
Q60996	2A5G	2A5G	Ppp2r5c
Q76MZ3	2AAA	2AAA	Ppp2r1a
Q6P1F6	2ABA	2ABA	Ppp2r2a
Q99L13	3HIDH	3HIDH	Hibadh
P10852	4F2	4F2	Slc3a2
Q3TA40	Q3TA40	6430548M08Rik	6430548M08Rik
Q9DCD0	6PGD	6PGD	Pgd
Q9CQ60	6PGL	6PGL	Pgls
A0A0A6YW67	A0A0A6YW67	A0A0A6YW67	Gm8797
A0A140T8T4	A0A140T8T4	A0A140T8T4	Rpl9-ps6
A0A1B0GS68	A0A1B0GS68	A0A1B0GS68	Gm45713
A0A1L1SQA2	A0A1L1SQA2	A0A1L1SQA2	Pam16l
A0A1W2P7G5	A0A1W2P7G5	A0A1W2P7G5	Coq10a
A0A1Y7VKY1	A0A1Y7VKY1	A0A1Y7VKY1	Rps18-ps5
A0A286YD08	A0A286YD08	A0A286YD08	Sec24c
A0A338P6I9	A0A338P6I9	A0A338P6I9	Gm56451
A0A338P6R8	A0A338P6R8	A0A338P6R8	Gm49601
A0A3B2W864	A0A3B2W864	A0A3B2W864	Gm49804
A2AT91	A2AT91	A2AT91	Plcb4
A0A2I3BR03	A0A2I3BR03	A4	App
A8DUK4	A8DUK4	A8DUK4	Hbb-bs
P63115	AAA1	AAA1	Slc7a10
Q3UHJ0	AAK1	AAK1	Aak1
Q99K67	AASS	AASS	Aass
P05201	AATC	AATC	Got1
P05202	AATM	AATM	Got2
Q61102	ABCB7	ABCB7	Abcb7
A0A0G2JDI9	A0A0G2JDI9	ABCD3	Abcd3
Q99LR1	ABD12	ABD12	Abhd12
Q91ZH7	ABHD3	ABHD3	Abhd3
Q6PE15	ABHDA	ABHDA	Abhd10
Q8K4F5	ABHDB	ABHDB	Abhd11
Q9Z1Q2	ABHGA	ABHGA	Abhd16a
B7ZCU0	B7ZCU0	ABI1	Abi1
A0A087WRS3	A0A087WRS3	ABI2	Abi2
E9Q030	E9Q030	ABLM1	Ablim1
Q8BL65	ABLM2	ABLM2	Ablim2
A0A571BG95	A0A571BG95	ABR	Abr
A0A0R4J0P1	A0A0R4J0P1	ACAD8	Acad8
Q8JZN5	ACAD9	ACAD9	Acad9
A0A0R4J083	A0A0R4J083	ACADL	Acadl
P45952	ACADM	ACADM	Acadm
Q07417	ACADS	ACADS	Acads
P50544	ACADV	ACADV	Acadvl
Q99PU5	ACBG1	ACBG1	Acsbg1
P31786	ACBP	ACBP	Dbi
Q9DBL1	ACDSB	ACDSB	Acadsb
Q3V117	Q3V117	ACLY	Acly
Q9CQR4	ACO13	ACO13	Acot13
P28271	ACOHC	ACOHC	Aco1
Q99KI0	ACON	ACON	Aco2
Q9QYR9	ACOT2	ACOT2	Acot2
Q9R0X4	ACOT9	ACOT9	Acot9
F6ZFT1	F6ZFT1	ACPM	Ndufab1
Q99NB1	ACS2L	ACS2L	Acss1
Q8VCW8	ACSF2	ACSF2	Acsf2
Q3URE1	ACSF3	ACSF3	Acsf3
D3Z041	D3Z041	ACSL1	Acsl1
E9PUC2	E9PUC2	ACSL3	Acsl3
Q91WC3	ACSL6	ACSL6	Acsl6
P68033	ACTC	ACTC	Actc1
P63260	ACTG	ACTG	Actg1
A1BN54	A1BN54	ACTN1	Actn1
Q9JI91	ACTN2	ACTN2	Actn2
A0A1L1SV25	A0A1L1SV25	ACTN4	Actn4
Q8R5C5	ACTY	ACTY	Actr1b
P61164	ACTZ	ACTZ	Actr1a
E9PYF2	E9PYF2	ADA10	Adam10
D3YUP9	D3YUP9	ADA22	Adam22
Q9R1V7	ADA23	ADA23	Adam23
Q9D0L4	ADCK1	ADCK1	Adck1
E9Q706	E9Q706	ADCY9	Adcy9
Q9QYB8	ADDB	ADDB	Add2
Q9QYB5	ADDG	ADDG	Add3
P28474	ADHX	ADHX	Adh5
P54923	ADPRH	ADPRH	Adprh
Q61578	ADRO	ADRO	Fdxr
P48962	ADT1	ADT1	Slc25a4
P51881	ADT2	ADT2	Slc25a5
Q6PDY2	AEDO	AEDO	Ado
F7C3I9	F7C3I9	AFAD	Afdn
Q3V384	AFG1L	AFG1L	Afg1l
Q8JZQ2	AFG32	AFG32	Afg3l2
Q3UHD9	AGAP2	AGAP2	Agap2
F8VQE9	F8VQE9	AGAP3	Agap3
A0A087WNV1	A0A087WNV1	AGFG1	Agfg1
Q9ESW4	AGK	AGK	Agk
Q68FL1	Q68FL1	AGRB3	Adgrb3
H7BX15	H7BX15	AGRL1	Adgrl1
B1AU25	B1AU25	AIFM1	Aifm1
P46660	AINX	AINX	Ina
A2AJA9	AJM1	AJM1	Ajm1
Q9JII6	AK1A1	AK1A1	Akr1a1
D3YVF0	AKAP5	AKAP5	Akap5
P24549	AL1A1	AL1A1	Aldh1a1
Q9CZS1	AL1B1	AL1B1	Aldh1b1
Q8R0Y6	AL1L1	AL1L1	Aldh1l1
B1ATI0	B1ATI0	AL3A2	Aldh3a2
Q8CHT0	AL4A1	AL4A1	Aldh4a1
Q9DBF1	AL7A1	AL7A1	Aldh7a1
Q9JLJ2	AL9A1	AL9A1	Aldh9a1
Q8BGT5	ALAT2	ALAT2	Gpt2
P07724	ALBU	ALBU	Alb
P47738	ALDH2	ALDH2	Aldh2
P05064	ALDOA	ALDOA	Aldoa
P05063	ALDOC	ALDOC	Aldoc
P45376	ALDR	ALDR	Akr1b1
Q9DBE8	ALG2	ALG2	Alg2
A2AE27	A2AE27	AMPD2	Ampd2
A0A0G2JEG8	A0A0G2JEG8	AMPH	Amph
Q9CPY7	AMPL	AMPL	Lap3
A0A0R4J1N7	A0A0R4J1N7	ANK1	Ank1
S4R2R5	S4R2R5	ANK2	Ank2
S4R2K9	S4R2K9	ANK3	Ank3
A0A0R4J2A6	A0A0R4J2A6	ANS1B	Anks1b
P07356	ANXA2	ANXA2	Anxa2
P48036	ANXA5	ANXA5	Anxa5
F8WIT2	F8WIT2	ANXA6	Anxa6
A0A2C9F2D2	A0A2C9F2D2	ANXA7	Anxa7
Q64133	AOFA	AOFA	Maoa
Q8BW75	AOFB	AOFB	Maob
Q61548	AP180	AP180	Snap91
O35643	AP1B1	AP1B1	Ap1b1
Q8CBB7	Q8CBB7	AP1G1	Ap1g1
P35585	AP1M1	AP1M1	Ap1m1
D3YXN0	D3YXN0	AP1S1	Ap1s1
P17426	AP2A1	AP2A1	Ap2a1
P17427	AP2A2	AP2A2	Ap2a2
Q9DBG3	AP2B1	AP2B1	Ap2b1
Q3TWV4	Q3TWV4	AP2M1	Ap2m1
P62743	AP2S1	AP2S1	Ap2s1
Q9JME5	AP3B2	AP3B2	Ap3b2
O54774	AP3D1	AP3D1	Ap3d1
Q8R2R9	AP3M2	AP3M2	Ap3m2
P56380	AP4A	AP4A	Nudt2
Q9D7N9	APMAP	APMAP	Apmap
P08226	APOE	APOE	Apoe
A0A0R4J0Z3	A0A0R4J0Z3	AQP4	Aqp4
Q7TS64	Q7TS64	ARBK1	Grk2
Q9R0Q6	ARC1A	ARC1A	Arpc1a
P61205	ARF3	ARF3	Arf3
P84084	ARF5	ARF5	Arf5
P62331	ARF6	ARF6	Arf6
V9GWV1	V9GWV1	ARFG1	Arfgap1
A0A1B0GS63	A0A1B0GS63	ARFP2	Arfip2
A0A0R4J0X8	A0A0R4J0X8	ARHG7	Arhgef7
Q8CG76	ARK72	ARK72	Akr7a2
A0A494BAJ6	A0A494BAJ6	ARL3	Arl3
Q9CQW2	ARL8B	ARL8B	Arl8b
Q9D0L7	ARM10	ARM10	Armc10
Q9D7A8	ARMC1	ARMC1	Armc1
P61161	ARP2	ARP2	Actr2
Q99JY9	ARP3	ARP3	Actr3
Q641P0	ARP3B	ARP3B	Actr3b
Q9D898	ARP5L	ARP5L	Arpc5l
Q9CVB6	ARPC2	ARPC2	Arpc2
H7BWZ3	H7BWZ3	ARPC3	Arpc3
P59999	ARPC4	ARPC4	Arpc4
Q9CPW4	ARPC5	ARPC5	Arpc5
J3QNU6	J3QNU6	ARRB1	Arrb1
Q9WV54	ASAH1	ASAH1	Asah1
H3BJY2	H3BJY2	ASAP1	Asap1
Q8C0M9	ASGL1	ASGL1	Asrgl1
P16460	ASSY	ASSY	Ass1
Q61137	ASTN1	ASTN1	Astn1
Q8VDN2	AT1A1	AT1A1	Atp1a1
Q6PIE5	AT1A2	AT1A2	Atp1a2
A0A0G2JGX4	A0A0G2JGX4	AT1A3	Atp1a3
P14094	AT1B1	AT1B1	Atp1b1
P14231	AT1B2	AT1B2	Atp1b2
P97370	AT1B3	AT1B3	Atp1b3
O55143	AT2A2	AT2A2	Atp2a2
G5E829	AT2B1	AT2B1	Atp2b1
S4R1C4	S4R1C4	AT2B2	Atp2b2
E9Q828	E9Q828	AT2B4	Atp2b4
Q9CQQ7	AT5F1	AT5F1	Atp5pb
A0A0M3HEP7	A0A0M3HEP7	AT8A1	Atp8a1
A0A494BAB5	A0A494BAB5	ATAD1	Atad1
Q925I1	ATAD3	ATAD3	Atad3
Q8BHE3	ATCAY	ATCAY	Atcay
E9PV44	E9PV44	ATIF1	Atpif1
Q8BH66	ATLA1	ATLA1	Atl1
P56382	ATP5E	ATP5E	Atp5f1e
Q9DCX2	ATP5H	ATP5H	Atp5pd
Q06185	ATP5I	ATP5I	Atp5me
P97450	ATP5J	ATP5J	Atp5pf
Q9CPQ8	ATP5L	ATP5L	Atp5mg
Q9CRA7	ATP5S	ATP5S	Dmac2l
P00848	ATP6	ATP6	Mtatp6
A0A1Y7VLP0	A0A1Y7VLP0	ATP68	Atp5mpl
P03930	ATP8	ATP8	Mtatp8
Q03265	ATPA	ATPA	Atp5f1a
P56480	ATPB	ATPB	Atp5f1b
Q9D3D9	ATPD	ATPD	Atp5f1d
H3BJP9	H3BJP9	ATPF1	Atpaf1
A0A0R4J1C5	A0A0R4J1C5	ATPF2	Atpaf2
Q8C2Q8	Q8C2Q8	ATPG	Atp5c1
P56135	ATPK	ATPK	Atp5mf
Q78IK2	ATPMK	ATPMK	Atp5mk
Q9DB20	ATPO	ATPO	Atp5po
A0A338P7G3	A0A338P7G3	ATPO-OCSP	Atp5o
A0A0R4J023	A0A0R4J023	AUHM	Auh
Q80TZ3	AUXI	AUXI	Dnajc6
B1AWC8	B1AWC8	B1AWC8	Pde4b
P59017	B2L13	B2L13	Bcl2l13
B2RXT3	B2RXT3	B2RXT3	Ogdhl
P04919	B3AT	B3AT	Slc4a1
E9PYH2	E9PYH2	BACH	Acot7
Q8CI32	BAG5	BAG5	Bag5
Q3UF95	Q3UF95	BAG6	Bag6
B1AZ46	B1AZ46	BAIP2	Baiap2
Q61335	BAP31	BAP31	Bcap31
P18572	BASI	BASI	Bsg
Q91XV3	BASP1	BASP1	Basp1
F7BNZ5	F7BNZ5	BCAS1	Bcas1
Q8CBC8	Q8CBC8	BCAT1	Bcat1
A0A1B0GX27	A0A1B0GX27	BCAT2	Bcat2
A0A0U1RNL7	A0A0U1RNL7	BCKD	Bckdk
Q9CZP5	BCS1	BCS1	Bcs1l
Q80XN0	BDH	BDH	Bdh1
O08539	BIN1	BIN1	Bin1
P20029	BIP	BIP	Hspa5
Q8R016	BLMH	BLMH	Blmh
A0A1B0GT26	A0A1B0GT26	BNIP3	Bnip3
Q9JM96	BORG4	BORG4	Cdc42ep4
Q8R164	BPHL	BPHL	Bphl
A0A1B0GRV0	A0A1B0GRV0	BPNT1	Bpnt1
Q91VR8	BRK1	BRK1	Brk1
D3Z5P0	D3Z5P0	BRSK1	Brsk1
O88737	BSN	BSN	Bsn
Q9DB72	BTBDH	BTBDH	Btbd17
O35127	C10	C10	Grcc10
Q8R5L1	Q8R5L1	C1QBP	C1qbp
Q3V3R1	C1TM	C1TM	Mthfd1l
Q80X80	C2C2L	C2C2L	C2cd2l
Q9CZB0	C560	C560	Sdhc
Q8C3W1	CA198	CA198	CA198
E9Q1X8	E9Q1X8	CA2D1	Cacna2d1
E9Q683	E9Q683	CA2D2	Cacna2d2
Q9Z1L5	CA2D3	CA2D3	Cacna2d3
Q06138	CAB39	CAB39	Cab39
A0A1L1SQZ2	A0A1L1SQZ2	CAC1A	Cacna1a
A2AIS0	A2AIS0	CAC1B	Cacna1b
A0A087WS83	A0A087WS83	CAC1E	Cacna1e
J3QK20	J3QK20	CACB4	Cacnb4
H7BX88	H7BX88	CACP	Crat
P70408	CAD10	CAD10	Cdh10
Q9WTR5	CAD13	CAD13	Cdh13
D3YYT0	D3YYT0	CADH2	Cdh2
E0CY16	E0CY16	CADM1	Cadm1
G3UZM4	G3UZM4	CADM2	Cadm2
K4DI58	K4DI58	CADM3	Cadm3
Q8R464	CADM4	CADM4	Cadm4
Q8CAK1	CAF17	CAF17	Iba57
P00920	CAH2	CAH2	Ca2
P12658	CALB1	CALB1	Calb1
Q08331	CALB2	CALB2	Calb2
P0DP26	CALM1	CALM1	Calm1
P14211	CALR	CALR	Calr
O35887	CALU	CALU	Calu
P35564	CALX	CALX	Canx
Q3UHL1	CAMKV	CAMKV	Camkv
O08529	CAN2	CAN2	Capn2
Q63810	CANB1	CANB1	Ppp3r1
Q6ZQ38	CAND1	CAND1	Cand1
P40124	CAP1	CAP1	Cap1
D3YTR7	D3YTR7	CAP2	Cap2
Q80TJ1	CAPS1	CAPS1	Cadps
P47757	CAPZB	CAPZB	Capzb
P24270	CATA	CATA	Cat
P10605	CATB	CATB	Ctsb
F8WIR1	F8WIR1	CATD	Ctsd
P47753	CAZA1	CAZA1	Capza1
P47754	CAZA2	CAZA2	Capza2
Q9R171	CBLN1	CBLN1	Cbln1
Q00493	CBPE	CBPE	Cpe
P48758	CBR1	CBR1	Cbr1
Q91VT4	CBR4	CBR4	Cbr4
E0CYX9	E0CYX9	CC127	Ccdc127
Q3UHB8	CC177	CC177	Ccdc177
D3YVV1	D3YVV1	CC50A	Tmem30a
Q8C3X2	CC90B	CC90B	Ccdc90b
Q9JJV5	CCG3	CCG3	Cacng3
S4R2F1	S4R2F1	CCG8	Cacng8
P53702	CCHL	CCHL	Hccs
E9Q4G8	E9Q4G8	CD166	Alcam
P56528	CD38	CD38	Cd38
A0A2R8VK70	A0A2R8VK70	CD47	Cd47
P35762	CD81	CD81	Cd81
P60766	CDC42	CDC42	Cdc42
Q9DB75	CDIP1	CDIP1	Cdip1
A0A0U1RP13	A0A0U1RP13	CDIPT	Cdipt
P49615	CDK5	CDK5	Cdk5
A2AMQ5	A2AMQ5	CDS2	Cds2
Q9JKC6	CEND	CEND	Cend1
B1AUQ7	B1AUQ7	CETN2	Cetn2
Q64433	CH10	CH10	Hspe1
P63038	CH60	CH60	Hspd1
Q9D8B3	CHM4B	CHM4B	Chmp4b
Q91WS0	CISD1	CISD1	Cisd1
B1AR13	CISD3	CISD3	Cisd3
Q9CZU6	CISY	CISY	Cs
A0A0R4J0K2	A0A0R4J0K2	CKAP5	Ckap5
Q8CJ61	CKLF4	CKLF4	Cmtm4
Q9D6G9	CKLF5	CKLF5	Cmtm5
A0A0N4SVH2	A0A0N4SVH2	CLAP1	Clasp1
Q8BRT1	CLAP2	CLAP2	Clasp2
B1AWD8	B1AWD8	CLCA	Clta
Q6IRU5	CLCB	CLCB	Cltb
Q9Z0S6	CLD10	CLD10	Cldn10
Q60771	CLD11	CLD11	Cldn11
Q9CQX5	CLDN1	CLDN1	Cldnd1
Q5SXR6	Q5SXR6	CLH1	Cltc
Q9QYB1	CLIC4	CLIC4	Clic4
Q9Z0H8	CLIP2	CLIP2	Clip2
Q8CCN6	Q8CCN6	CLPB	Clpb
O88696	CLPP	CLPP	Clpp
Q6P8N8	Q6P8N8	CLPX	Clpx
Q06890	CLUS	CLUS	Clu
Q8R4N0	CLYBL	CLYBL	Clybl
Q3U5Q7	CMPK2	CMPK2	Cmpk2
Q8BIG7	CMTD1	CMTD1	Comtd1
P16330	CN37	CN37	Cnp
Q9D1A2	CNDP2	CNDP2	Cndp2
Q5M8N0	CNRP1	CNRP1	Cnrip1
O88507	CNTFR	CNTFR	Cntfr
P12960	CNTN1	CNTN1	Cntn1
Q61330	CNTN2	CNTN2	Cntn2
O54991	CNTP1	CNTP1	Cntnap1
E9QNF7	E9QNF7	CNTP2	Cntnap2
P11087	CO1A1	CO1A1	Col1a1
Q8BGD8	COA6	COA6	Coa6
Q9DBL7	COASY	COASY	Coasy
P18760	COF1	COF1	Cfl1
P45591	COF2	COF2	Cfl2
Q8BMS4	COQ3	COQ3	Coq3
Q9CXI0	COQ5	COQ5	Coq5
F6ZE40	COQ6	COQ6	Coq6
A0A140LIF0	A0A140LIF0	COQ7	Coq7
F7B1B6	F7B1B6	COQ8A	Coq8a
F6SFF5	F6SFF5	COQ9	Coq9
O89053	COR1A	COR1A	Coro1a
Q9WUM3	COR1B	COR1B	Coro1b
Q9WUM4	COR1C	COR1C	Coro1c
Q8BH44	COR2B	COR2B	Coro2b
Q9CQI6	COTL1	COTL1	Cotl1
P00397	COX1	COX1	Mtco1
P00405	COX2	COX2	Mtco2
Q9D7J4	COX20	COX20	Cox20
P00416	COX3	COX3	mt-Co3
P19783	COX41	COX41	Cox4i1
P12787	COX5A	COX5A	Cox5a
Q9CPQ1	COX6C	COX6C	Cox6c
P63040	CPLX1	CPLX1	Cplx1
P84086	CPLX2	CPLX2	Cplx2
Q8JZW4	CPNE5	CPNE5	Cpne5
Q3UYN2	Q3UYN2	CPNE6	Cpne6
Q0VE82	CPNE7	CPNE7	Cpne7
O88456	CPNS1	CPNS1	Capns1
P97742	CPT1A	CPT1A	Cpt1a
P52825	CPT2	CPT2	Cpt2
Q9DCT8	CRIP2	CRIP2	Crip2
Q5ND50	Q5ND50	CRK	Crk
A0A338P675	A0A338P675	CRKL	Crkl
A0A1L1SRG5	A0A1L1SRG5	CRYAB	Cryab
O54983	CRYM	CRYM	Crym
Q60737	CSK21	CSK21	Csnk2a1
O54833	CSK22	CSK22	Csnk2a2
G3UZA4	G3UZA4	CSK2B	Csnk2b
Q6P9K8	CSKI1	CSKI1	Caskin1
O70589	CSKP	CSKP	Cask
P61202	CSN2	CSN2	Cops2
O88544	CSN4	CSN4	Cops4
O35864	CSN5	CSN5	Cops5
D3Z0F5	D3Z0F5	CSN6	Cops6
Q9CZ04	CSN7A	CSN7A	Cops7a
Q8VBV7	CSN8	CSN8	Cops8
G3XA35	G3XA35	CSPG2	Vcan
Q71M36	CSPG5	CSPG5	Cspg5
P97315	CSRP1	CSRP1	Csrp1
A0A0J9YU62	A0A0J9YU62	CTBP1	Ctbp1
A2AMH3	A2AMH3	CTL1	Slc44a1
A0A1L1SVG6	A0A1L1SVG6	CTL2	Slc44a2
P26231	CTNA1	CTNA1	Ctnna1
Q61301	CTNA2	CTNA2	Ctnna2
Q02248	CTNB1	CTNB1	Ctnnb1
D3Z2H7	D3Z2H7	CTND1	Ctnnd1
B7ZNF6	B7ZNF6	CTND2	Ctnnd2
F6SBR5	F6SBR5	CTRO	Cit
B9EJA2	CTTB2	CTTB2	Cttnbp2
Q9JLV5	CUL3	CUL3	Cul3
Q9DCW5	Q9DCW5	CX6A1	Cox6a1
P56391	CX6B1	CX6B1	Cox6b1
P48771	CX7A2	CX7A2	Cox7a2
P23242	CXA1	CXA1	Gja1
Q9D0M3	CY1	CY1	Cyc1
G5E850	G5E850	CYB5	Cyb5a
Q9CQX2	CYB5B	CYB5B	Cyb5b
P62897	CYC	CYC	Cycs
Q7TMB8	CYFP1	CYFP1	Cyfip1
Q5SQX6	CYFP2	CYFP2	Cyfip2
A0A1B0GRX7	A0A1B0GRX7	CYH2	Cyth2
A0A1B0GSE5	A0A1B0GSE5	CYLD	Cyld
Q921M7	CYRIB	CYRIB	Cyrib
A2APX3	A2APX3	CYTC	Cst3
Q5M8N4	D39U1	D39U1	Sdr39u1
D3YTP3	D3YTP3	D3YTP3	Mtx3
D3YXH0	D3YXH0	D3YXH0	Gm49948
D3Z2B3	D3Z2B3	D3Z2B3	Acad12
D3Z494	D3Z494	D3Z494	Akr1b10
Q62418	DBNL	DBNL	Dbnl
Q8R1Q8	DC1L1	DC1L1	Dync1li1
A0A1D5RMC1	A0A1D5RMC1	DC1L2	Dync1li2
Q8BHC4	DCAKD	DCAKD	Dcakd
P48318	DCE1	DCE1	Gad1
P48320	DCE2	DCE2	Gad2
A0A0G2JGQ6	A0A0G2JGQ6	DCLK1	Dclk1
Q99J39	DCMC	DCMC	Mlycd
E9Q3M3	E9Q3M3	DCTN1	Dctn1
Q99KJ8	DCTN2	DCTN2	Dctn2
E9Q919	E9Q919	DCTN3	Dctn3
Q8CBY8	DCTN4	DCTN4	Dctn4
Q9QZB9	DCTN5	DCTN5	Dctn5
Q9CWS0	DDAH1	DDAH1	Ddah1
O08972	O08972	DDAH2	Ddah2
O88533	DDC	DDC	Ddc
Q91VR5	DDX1	DDX1	Ddx1
Q62167	DDX3X	DDX3X	Ddx3x
Q9CQ62	DECR	DECR	Decr1
Q9WV69	DEMA	DEMA	Dmtn
E9Q0G1	E9Q0G1	DENR	Denr
Q9R0P5	DEST	DEST	Dstn
Q6P5E8	DGKQ	DGKQ	Dgkq
Q6WQJ1	DGLA	DGLA	Dagla
A0A0U1RPX3	A0A0U1RPX3	DGUOK	Dguok
Q9EQ06	DHB11	DHB11	Hsd17b11
O70503	DHB12	DHB12	Hsd17b12
P51660	DHB4	DHB4	Hsd17b4
P50171	DHB8	DHB8	Hsd17b8
P26443	DHE3	DHE3	Glud1
A0A0G2JGJ1	A0A0G2JGJ1	DHPR	Qdpr
Q99L04	DHRS1	DHRS1	Dhrs1
A0A2I3BRG8	A0A2I3BRG8	DHRS4	Dhrs4
Q9CXV1	DHSD	DHSD	Sdhd
Q9QZD8	DIC	DIC	Slc25a10
Q5PR73	DIRA2	DIRA2	Diras2
Q5U458	DJC11	DJC11	Dnajc11
O08749	DLDH	DLDH	Dld
D3Z3B8	D3Z3B8	DLG1	Dlg1
A0A338P6J0	A0A338P6J0	DLG2	Dlg2
A2BEE9	A2BEE9	DLG3	Dlg3
A0A338P6E5	A0A338P6E5	DLG4	Dlg4
Q9D415	DLGP1	DLGP1	Dlgap1
Q0VF59	Q0VF59	DLGP2	Dlgap2
B1AS06	B1AS06	DLGP3	Dlgap3
B1AZP2	DLGP4	DLGP4	Dlgap4
P62627	DLRB1	DLRB1	Dynlrb1
Q8BPN8	DMXL2	DMXL2	Dmxl2
P63037	DNJA1	DNJA1	Dnaja1
Q9QYJ0	DNJA2	DNJA2	Dnaja2
Q99M87	DNJA3	DNJA3	Dnaja3
A0A0G2JER9	A0A0G2JER9	DNJB6	Dnajb6
P60904	DNJC5	DNJC5	Dnajc5
Q8K1M6	DNM1L	DNM1L	Dnm1l
Q3TVK3	Q3TVK3	DNPEP	Dnpep
F8VPQ1	F8VPQ1	DOCK3	Dock3
Q8K3H0	DP13A	DP13A	Appl1
Q6NXK7	DPP10	DPP10	Dpp10
Q5U4C2	Q5U4C2	DPP6	Dpp6
P97427	DPYL1	DPYL1	Crmp1
O08553	DPYL2	DPYL2	Dpysl2
E9PWE8	E9PWE8	DPYL3	Dpysl3
A0A0R4J1N0	A0A0R4J1N0	DPYL4	Dpysl4
Q9EQF6	DPYL5	DPYL5	Dpysl5
Q9QXS6	DREB	DREB	Dbn1
Z4YKT6	Z4YKT6	DRS7B	Dhrs7b
Q9DD18	DTD1	DTD1	Dtd1
A0A1Y7VL34	A0A1Y7VL34	DTNA	Dtna
B1AQF4	B1AQF4	DUS3	Dusp3
Q91XQ0	DYH8	DYH8	Dnah8
Q9JHU4	DYHC1	DYHC1	Dync1h1
P63168	DYL1	DYL1	Dynll1
Q9D0M5	DYL2	DYL2	Dynll2
F6TH70	F6TH70	DYN1	Dnm1
E9QLL2	E9QLL2	DYN3	Dnm3
A0A087WSP0	A0A087WSP0	DYST	Dst
A2AUK5	A2AUK5	E41L1	Epb41l1
Q80UE4	Q80UE4	E41L2	Epb41l2
E9PVN6	E9PVN6	E9PVN6	Gm20498
E9PX29	E9PX29	E9PX29	Sptbn4
E9PY16	E9PY16	E9PY16	Adap1
E9PZF0	E9PZF0	E9PZF0	Gm20390
P56564	EAA1	EAA1	Slc1a3
P43006	EAA2	EAA2	Slc1a2
O35459	ECH1	ECH1	Ech1
Q8BMS1	ECHA	ECHA	Hadha
Q99JY0	ECHB	ECHB	Hadhb
Q9D9V3	ECHD1	ECHD1	Echdc1
Q8BH95	ECHM	ECHM	Echs1
P42125	ECI1	ECI1	Eci1
Q3TCD4	Q3TCD4	ECI2	Eci2
A0A0R4J174	A0A0R4J174	ECSIT	Ecsit
P10126	EF1A1	EF1A1	Eef1a1
P62631	EF1A2	EF1A2	Eef1a2
O70251	EF1B	EF1B	Eef1b
P57776	EF1D	EF1D	Eef1d
Q9D8N0	EF1G	EF1G	Eef1g
P58252	EF2	EF2	Eef2
Q8K0D5	EFGM	EFGM	Gfm1
Q8C845	Q8C845	EFHD2	Efhd2
A0A1W2P7T9	A0A1W2P7T9	EFR3B	Efr3b
Q9CZR8	EFTS	EFTS	Tsfm
Q8BFR5	EFTU	EFTU	Tufm
Q9WVK4	EHD1	EHD1	Ehd1
Q9QXY6	EHD3	EHD3	Ehd3
Q3UGC7	EI3JA	EI3JA	Eif3j1
P48024	EIF1	EIF1	Eif1
Q3V1U8	ELMD1	ELMD1	Elmod1
Q8BHL5	ELMO2	ELMO2	Elmo2
P62869	ELOB	ELOB	Elob
P21995	EMB	EMB	Emb
A0A0A6YW06	A0A0A6YW06	ENAH	Enah
Q8C522	ENDD1	ENDD1	Endod1
P17182	ENOA	ENOA	Eno1
P17183	ENOG	ENOG	Eno2
Q8BGB7	ENOPH	ENOPH	Enoph1
P08113	ENPL	ENPL	Hsp90b1
O55026	ENTP2	ENTP2	Entpd2
Q60902	EP15R	EP15R	Eps15l1
Q03137	EPHA4	EPHA4	Epha4
Q80VP1	EPN1	EPN1	Epn1
Q3UHT7	Q3UHT7	ERC2	Erc2
A0A494BAK4	A0A494BAK4	ERGI1	Ergic1
Q5EBJ4	ERMIN	ERMIN	Ermn
P57759	ERP29	ERP29	Erp29
H3BKH6	H3BKH6	ESTD	Esd
Q99LC5	ETFA	ETFA	Etfa
Q9DCW4	ETFB	ETFB	Etfb
Q6PF96	Q6PF96	ETFD	Etfdh
Q9DCM0	ETHE1	ETHE1	Ethe1
Q9D4H1	EXOC2	EXOC2	Exoc2
O35382	EXOC4	EXOC4	Exoc4
Q3TPX4	EXOC5	EXOC5	Exoc5
Q8C163	EXOG	EXOG	Exog
P26040	EZRI	EZRI	Ezr
F8WJK8	F8WJK8	F10A1	St13
Q9CR98	F136A	F136A	Fam136a
Q9D6U8	F162A	F162A	Fam162a
Q8BGY7	F210A	F210A	Fam210a
F6QCI0	F6QCI0	F6QCI0	Taf15
F6TVX7	F6TVX7	F6TVX7	Gm20671
F8VPN4	F8VPN4	F8VPN4	Agl
F8VQK3	F8VQK3	F8VQK3	Gucy1a2
P35505	FAAA	FAAA	Fah
O08914	FAAH1	FAAH1	Faah
Q8R3F5	FABD	FABD	Mcat
Q05816	FABP5	FABP5	Fabp5
P11404	FABPH	FABPH	Fabp3
Q8R123	FAD1	FAD1	Flad1
Q3TDN2	FAF2	FAF2	Faf2
Q8R0F8	FAHD1	FAHD1	Fahd1
A0A0R4J094	A0A0R4J094	FAHD2	Fahd2a
Q91YM4	FAKD4	FAKD4	Tbrg4
F8VPU2	FARP1	FARP1	Farp1
P19096	FAS	FAS	Fasn
Q80UW2	FBX2	FBX2	Fbxo2
Q6NS60	FBX41	FBX41	Fbxo41
Q9CPW2	FDX2	FDX2	Fdx2
Q8CIB5	FERM2	FERM2	Fermt2
A0A338P764	A0A338P764	FGF12	Fgf12
Q9CQ92	FIS1	FIS1	Fis1
P26883	FKB1A	FKB1A	Fkbp1a
P45878	FKBP2	FKBP2	Fkbp2
A0A1Y7VLK0	A0A1Y7VLK0	FKBP3	Fkbp3
P30416	FKBP4	FKBP4	Fkbp4
O35465	FKBP8	FKBP8	Fkbp8
O08917	FLOT1	FLOT1	Flot1
Q5SS83	Q5SS83	FLOT2	Flot2
A2APV2	FMNL2	FMNL2	Fmnl2
Q6P264	Q6P264	FN3K	Fn3k
A0A0G2JDJ5	A0A0G2JDJ5	FPPS	Fdps
B1AXV0	FRS1L	FRS1L	Frrs1l
Q61553	FSCN1	FSCN1	Fscn1
P97807	FUMH	FUMH	Fh
Q9D6K8	FUND2	FUND2	Fundc2
A2RT62	FXL16	FXL16	Fbxl16
P39688	FYN	FYN	Fyn
Q99JG2	G37L1	G37L1	Gpr37l1
P97379	G3BP2	G3BP2	G3bp2
S4R1W8	S4R1W8	G3P	Gapdh
G3UXL2	G3UXL2	G3UXL2	Prps1l3
Q00612	G6PD1	G6PD1	G6pdx
P06745	G6PI	G6PI	Gpi
Q9WV18	GABR1	GABR1	Gabbr1
Q80T41	GABR2	GABR2	Gabbr2
P61922	GABT	GABT	Abat
A0A0R4J0F6	A0A0R4J0F6	GAK	Gak
Q9D172	GAL3A	GAL3A	Gatd3
Q8BHN3	GANAB	GANAB	Ganab
Q9CZD3	GARS	GARS	Gars1
B1ATI9	B1ATI9	GAS7	Gas7
Q9D964	GATM	GATM	Gatm
P62874	GBB1	GBB1	Gnb1
P62880	GBB2	GBB2	Gnb2
P29387	GBB4	GBB4	Gnb4
A0A0N4SVT3	A0A0N4SVT3	GBG12	Gng12
Q9JMF3	GBG13	GBG13	Gng13
P63213	GBG2	GBG2	Gng2
P63216	GBG3	GBG3	Gng3
P50153	GBG4	GBG4	Gng4
G3X9Q2	G3X9Q2	GBG7	Gng7
P62812	GBRA1	GBRA1	Gabra1
B1AVY2	B1AVY2	GBRA3	Gabra3
P50571	GBRB1	GBRB1	Gabrb1
P63137	GBRB2	GBRB2	Gabrb2
F6ZYH6	F6ZYH6	GBRB3	Gabrb3
Q8C7N0	Q8C7N0	GBRG2	Gabrg2
P60521	GBRL2	GBRL2	Gabarapl2
A0A0A0MQ68	A0A0A0MQ68	GCDH	Gcdh
Q91WK5	GCSH	GCSH	Gcsh
Q91W43	GCSP	GCSP	Gldc
Q80YP4	Q80YP4	GCYB1	Gucy1b1
Q3USC7	Q3USC7	GD1L1	Gdap1l1
O88741	GDAP1	GDAP1	Gdap1
P50396	GDIA	GDIA	Gdi1
Q61598	GDIB	GDIB	Gdi2
Q99PT1	GDIR1	GDIR1	Arhgdia
Q9CRY7	GDPD1	GDPD1	Gdpd1
E9Q912	GDS1	GDS1	Rap1gds1
A0JNY3	A0JNY3	GEPH	Gphn
O54984	GET3	GET3	Get3
P03995	GFAP	GFAP	Gfap
Q99JP7	GGT7	GGT7	Ggt7
Q9D6M3	GHC1	GHC1	Slc25a22
Q9DB41	GHC2	GHC2	Slc25a18
Q91VC9	GHITM	GHITM	Ghitm
Q5F258	Q5F258	GIT1	Git1
P15105	GLNA	GLNA	Glul
G5E8T9	G5E8T9	GLO2	Hagh
Q9CPV4	GLOD4	GLOD4	Glod4
Q64516	GLPK	GLPK	Gk
Q5NCU0	Q5NCU0	GLRA1	Glra1
Q80Y14	GLRX5	GLRX5	Glrx5
D3Z7P3	GLSK	GLSK	Gls
D3Z1H8	D3Z1H8	GLTP	Gltp
O08795	GLU2B	GLU2B	Prkcsh
Q8BH86	GLUCM	GLUCM	Dglucy
Q9CZN7	GLYM	GLYM	Shmt2
Q9CQI3	GMFB	GMFB	Gmfb
P21278	GNA11	GNA11	Gna11
P27601	GNA13	GNA13	Gna13
B2RSH2	GNAI1	GNAI1	Gnai1
P08752	GNAI2	GNAI2	Gnai2
Q9DC51	GNAI3	GNAI3	Gnai3
Q66L47	Q66L47	GNAL	Gnal
P18872	GNAO	GNAO	Gnao1
P21279	GNAQ	GNAQ	Gnaq
P63094	GNAS2	GNAS2	Gnas
O70443	GNAZ	GNAZ	Gnaz
P62881	GNB5	GNB5	Gnb5
Q9D428	GOG7B	GOG7B	GOLGA7B
Q8C419	GP158	GP158	Gpr158
Q3ULJ0	GPD1L	GPD1L	Gpd1l
P13707	GPDA	GPDA	Gpd1
Q64521	GPDM	GPDM	Gpd2
P35802	GPM6A	GPM6A	Gpm6a
A2AEG6	A2AEG6	GPM6B	Gpm6b
A0A0A6YVV2	A0A0A6YVV2	GPX1	Gpx1
O70325	GPX4	GPX4	Gpx4
B1AT92	B1AT92	GRB2	Grb2
Q91Z53	GRHPR	GRHPR	Grhpr
G5E863	G5E863	GRIA4	Gria4
Q61625	GRID2	GRID2	Grid2
Q3UNH4	GRIN1	GRIN1	Gprin1
P97772	GRM1	GRM1	Grm1
Q14BI2	GRM2	GRM2	Grm2
Q9QYS2	GRM3	GRM3	Grm3
A0A338P7K6	A0A338P7K6	GRM4	Grm4
Q3UVX5	GRM5	GRM5	Grm5
P38647	GRP75	GRP75	Hspa9
Q99LP6	GRPE1	GRPE1	Grpel1
P47791	GSHR	GSHR	Gsr
E9QAQ5	E9QAQ5	GSK3B	Gsk3b
P24472	GSTA4	GSTA4	Gsta4
Q9DCM2	GSTK1	GSTK1	Gstk1
P10649	GSTM1	GSTM1	Gstm1
P48774	GSTM5	GSTM5	Gstm5
O09131	GSTO1	GSTO1	Gsto1
P19157	GSTP1	GSTP1	Gstp1
P17809	GTR1	GTR1	Slc2a1
P32037	GTR3	GTR3	Slc2a3
Q9R111	GUAD	GUAD	Gda
Q8C3X4	GUF1	GUF1	Guf1
P43274	H14	H14	H1-4
A0A0N4SV66	A0A0N4SV66	H2AJ	H2aj
Q6ZWY9	H2B1C	H2B1C	H2bc8
E0CZ27	E0CZ27	H33	H3f3a
H3BJD0	H3BJD0	H3BJD0	Ppp1r9a
P62806	H4	H4	H4c16
Q8K2C9	HACD3	HACD3	Hacd3
Q3UHX2	HAP28	HAP28	Pdap1
A0A0G2JDP0	A0A0G2JDP0	HAX1	Hax1
Q91VB8	Q91VB8	HBA	Hba-a1
Q99N15	Q99N15	HCD2	Hsd17b10
Q61425	HCDH	HCDH	Hadh
O88704	HCN1	HCN1	Hcn1
O88703	HCN2	HCN2	Hcn2
Q3UGR5	HDHD2	HDHD2	Hdhd2
Q9CYW4	HDHD3	HDHD3	Hdhd3
A0A140T8J4	A0A140T8J4	HEBP1	Hebp1
Q640R3	HECAM	HECAM	Hepacam
A0A494BAI5	A0A494BAI5	HEMH	Fech
P20060	HEXB	HEXB	Hexb
Q3UMA3	Q3UMA3	HGS	Hgs
Q8QZS1	HIBCH	HIBCH	Hibch
P70349	HINT1	HINT1	Hint1
Q9D0S9	HINT2	HINT2	Hint2
F8WH96	F8WH96	HINT3	Hint3
P38060	HMGCL	HMGCL	Hmgcl
D3YX62	D3YX62	HMOX2	Hmox2
B2M1R6	B2M1R6	HNRPK	Hnrnpk
A0A0R4J259	A0A0R4J259	HNRPQ	Syncrip
Q9Z2Y3	HOME1	HOME1	Homer1
A0A140LHR9	A0A140LHR9	HOME2	Homer2
Q99JP6	HOME3	HOME3	Homer3
P84075	HPCA	HPCA	Hpca
P62748	HPCL1	HPCL1	Hpcal1
Q8BGZ1	HPCL4	HPCL4	Hpcal4
Q9QUP5	HPLN1	HPLN1	Hapln1
Q9ESM3	HPLN2	HPLN2	Hapln2
Q80WM4	HPLN4	HPLN4	Hapln4
P00493	HPRT	HPRT	Hprt1
Q61699	HS105	HS105	Hsph1
Q8K0U4	HS12A	HS12A	Hspa12a
P17879	HS71B	HS71B	Hspa1b
P48722	HS74L	HS74L	Hspa4l
P07901	HS90A	HS90A	Hsp90aa1
P11499	HS90B	HS90B	Hsp90ab1
Q9CQZ1	HSBP1	HSBP1	Hsbp1
A0A0R4J0T0	A0A0R4J0T0	HSC20	Hscb
Q8BTX9	HSDL1	HSDL1	Hsdl1
Q2TPA8	HSDL2	HSDL2	Hsdl2
P17156	HSP72	HSP72	Hspa2
Q3U2G2	Q3U2G2	HSP74	Hspa4
P63017	HSP7C	HSP7C	Hspa8
Q9JIY5	HTRA2	HTRA2	Htra2
G3UVV4	G3UVV4	HXK1	Hk1
Q8C729	HYCC2	HYCC2	Hycc2
E9PWK1	E9PWK1	HYEP	Ephx1
Q9JKR6	HYOU1	HYOU1	Hyou1
I3ITR1	I3ITR1	I3ITR1	AK157302
Q7TNC9	I5P1	I5P1	Inpp5a
Q60625	ICAM5	ICAM5	Icam5
Q9D6R2	IDH3A	IDH3A	Idh3a
O88844	IDHC	IDHC	Idh1
P70404	IDHG1	IDHG1	Idh3g
P54071	IDHP	IDHP	Idh2
G3XA48	G3XA48	IDI1	Idi1
P60843	IF4A1	IF4A1	Eif4a1
E9Q561	E9Q561	IF4A2	Eif4a2
Q8BGD9	IF4B	IF4B	Eif4b
A0A0G2JGT5	A0A0G2JGT5	IF4E	Eif4e
G3XA17	G3XA17	IF4G2	Eif4g2
Q9WUK2	IF4H	IF4H	Eif4h
Q8BVV6	Q8BVV6	IF5	Eif5
A0A0A0MQM0	A0A0A0MQM0	IF5A1	Eif5a
G3UYZ1	G3UYZ1	IGSF8	Igsf8
P70168	IMB1	IMB1	Kpnb1
Q924B0	Q924B0	IMPA1	Impa1
A0A0R4J0Q2	A0A0R4J0Q2	INP4A	Inpp4a
E0CX64	E0CX64	INPP	Inpp1
Q8R071	IP3KA	IP3KA	Itpka
Q8BKC5	IPO5	IPO5	Ipo5
Q9D819	IPYR	IPYR	Ppa1
Q91VM9	IPYR2	IPYR2	Ppa2
A0A1D5RM83	A0A1D5RM83	IQEC1	Iqsec1
A4GZ26	A4GZ26	IQEC2	Iqsec2
Q3TES0	IQEC3	IQEC3	Iqsec3
P85094	ISC2A	ISC2A	Isoc2a
A0A1Y7VK19	A0A1Y7VK19	ISCA2	Isca2
D3Z7W0	D3Z7W0	ISCU	Iscu
A2AKI5	A2AKI5	ITAV	Itgav
Q0VBD0	ITB8	ITB8	Itgb8
A0A2I3BPW7	A0A2I3BPW7	ITM2B	Itm2b
A0A087WRM2	A0A087WRM2	ITM2C	Itm2c
Q9D892	ITPA	ITPA	Itpa
P11881	ITPR1	ITPR1	Itpr1
E9Q0N0	E9Q0N0	ITSN1	Itsn1
Q9JHI5	IVD	IVD	Ivd
J3QNR6	J3QNR6	JIP3	Mapk8ip3
Q9R0Y5	KAD1	KAD1	Ak1
Q9WTP6	KAD2	KAD2	Ak2
Q9WTP7	KAD3	KAD3	Ak3
Q9WUR9	KAD4	KAD4	Ak4
A0A0A6YX73	A0A0A6YX73	KAP2	Prkar2a
P31324	KAP3	KAP3	Prkar2b
P05132	KAPCA	KAPCA	Prkaca
P68181	KAPCB	KAPCB	Prkacb
Q71RI9	KAT3	KAT3	Kyat3
O88986	KBL	KBL	Gcat
Q8BNW9	KBTBB	KBTBB	Kbtbd11
H7BXB1	H7BXB1	KC1A	Csnk1a1
A0A571BGH0	A0A571BGH0	KCAB2	Kcnab2
P11798	KCC2A	KCC2A	Camk2a
P28652	KCC2B	KCC2B	Camk2b
E9Q1T1	E9Q1T1	KCC2D	Camk2d
Q923T9	KCC2G	KCC2G	Camk2g
A0A0R4J2B2	A0A0R4J2B2	KCD12	Kctd12
Q5DTY9	KCD16	KCD16	Kctd16
Q9JM63	KCJ10	KCJ10	Kcnj10
A0A087WQ41	A0A087WQ41	KCMA1	Kcnma1
P63141	KCNA2	KCNA2	Kcna2
A0A140LHI4	A0A140LHI4	KCNC3	Kcnc3
Q9Z0V2	KCND2	KCND2	Kcnd2
Q04447	KCRB	KCRB	Ckb
P30275	KCRU	KCRU	Ckmt1
A0A0R4J093	A0A0R4J093	KCY	Cmpk1
Q9CQX8	KGD4	KGD4	Mrps36
Q64520	KGUA	KGUA	Guk1
E9Q0J5	E9Q0J5	KI21A	Kif21a
P33173	KIF1A	KIF1A	Kif1a
E0CZ72	E0CZ72	KIF2A	Kif2a
P28738	KIF5C	KIF5C	Kif5c
Q61768	KINH	KINH	Kif5b
A0A5F8MPZ2	A0A5F8MPZ2	KLC1	Klc1
D3YXZ3	D3YXZ3	KLC2	Klc2
P68404	KPCB	KPCB	Prkcb
P16054	KPCE	KPCE	Prkce
P63318	KPCG	KPCG	Prkcg
Q8R574	KPRB	KPRB	Prpsap2
P52480	KPYM	KPYM	Pkm
P97930	KTHY	KTHY	Dtymk
A2AFG8	A2AFG8	L1CAM	L1cam
Q91YP0	L2HDH	L2HDH	L2hgdh
Q9EP89	LACTB	LACTB	Lactb
P11438	LAMP1	LAMP1	Lamp1
Q9D387	LAMP5	LAMP5	Lamp5
O89112	LANC1	LANC1	Lancl1
F6RJV6	F6RJV6	LANC2	Lancl2
Q61792	LASP1	LASP1	Lasp1
Q9Z127	LAT1	LAT1	Slc7a5
A0A1B0GSX0	A0A1B0GSX0	LDHA	Ldha
A0A6I8MX27	A0A6I8MX27	LDHB	Ldhb
Q8VED9	LEGL	LEGL	Lgalsl
Q9Z2I0	LETM1	LETM1	Letm1
E9QL80	E9QL80	LGAT1	Lpgat1
A0A0G2JGB7	A0A0G2JGB7	LGI1	Lgi1
Q8K4Z0	LGI2	LGI2	Lgi2
Q8K406	LGI3	LGI3	Lgi3
Q9CPU0	LGUL	LGUL	Glo1
A9DA50	A9DA50	LIGO1	Lingo1
Q8JZS0	LIN7A	LIN7A	Lin7a
O88951	LIN7B	LIN7B	Lin7b
O88952	LIN7C	LIN7C	Lin7c
B8QI34	B8QI34	LIPA2	Ppfia2
P60469	LIPA3	LIPA3	Ppfia3
P63005	LIS1	LIS1	Pafah1b1
P24527	LKHA4	LKHA4	Lta4h
Q8CGK3	LONM	LONM	Lonp1
Q6PB66	LPPRC	LPPRC	Lrpprc
Q80WG5	LRC8A	LRC8A	Lrrc8a
A0A0R4J0I9	A0A0R4J0I9	LRP1	Lrp1
Q80TE7	LRRC7	LRRC7	Lrrc7
A0A087WP70	A0A087WP70	LSAMP	Lsamp
Q924L1	LTMD1	LTMD1	Letmd1
Q8K356	Q8K356	LY6H	Ly6h
P0DP60	LYNX1	LYNX1	Lynx1
D3YUG4	D3YUG4	LYPA1	Lypla1
Q9WTL7	LYPA2	LYPA2	Lypla2
Q3UFF7	LYPL1	LYPL1	Lyplal1
Q9DA03	LYRM7	LYRM7	Lyrm7
Q9CR62	M2OM	M2OM	Slc25a11
Q14BB9	MA6D1	MA6D1	Map6d1
A0A1Y7VJZ2	A0A1Y7VJZ2	MAAI	Gstz1
Q922B1	MACD1	MACD1	Macrod1
E9QA63	E9QA63	MACF1	Macf1
A0A0R4J1F4	A0A0R4J1F4	MADD	Madd
P20917	MAG	MAG	Mag
Q4VBG2	Q4VBG2	MAGI1	Magi1
A0A140LHL1	A0A140LHL1	MAGI2	Magi2
Q8BHE8	MAIP1	MAIP1	Maip1
Q8BI08	MAL2	MAL2	Mal2
Q99KE1	MAOM	MAOM	Me2
Q8BMF3	MAON	MAON	Me3
P06801	MAOX	MAOX	Me1
A2ARP8	A2ARP8	MAP1A	Map1a
P14873	MAP1B	MAP1B	Map1b
P27546	MAP4	MAP4	Map4
Q7TSJ2	MAP6	MAP6	Map6
Q922Q1	MARC2	MARC2	Mtarc2
P26645	MARCS	MARCS	Marcks
D3YYK8	D3YYK8	MARE2	Mapre2
Q6PER3	MARE3	MARE3	Mapre3
A0A0R4J1H0	A0A0R4J1H0	MARH5	Marchf5
Q8VHJ5	MARK1	MARK1	Mark1
A0A0R4J0B1	A0A0R4J0B1	MARK2	Mark2
Q8BL86	MBLC2	MBLC2	Mblac2
Q8CHK3	MBOA7	MBOA7	Mboat7
A0A498WGS3	A0A498WGS3	MBP	Mbp
Q9Z2Z6	MCAT	MCAT	Slc25a20
Q99MR8	MCCA	MCCA	Mccc1
Q3ULD5	MCCB	MCCB	Mccc2
Q9D1I5	MCEE	MCEE	Mcee
Q3UMR5	MCU	MCU	Mcu
P14152	MDHC	MDHC	Mdh1
P08249	MDHM	MDHM	Mdh2
Q9DCS3	MECR	MECR	Mecr
A0A0U1RNK6	A0A0U1RNK6	METK2	Mat2a
E0CYB9	E0CYB9	MFF	Mff
Q80U63	MFN2	MFN2	Mfn2
Q9CWE0	MFR1L	MFR1L	Mtfr1l
D3Z183	D3Z183	MFSD6	Mfsd6
D3YYS6	D3YYS6	MGLL	Mgll
Q9CPU4	MGST3	MGST3	Mgst3
Q7TNS2	MIC10	MIC10	Micos10
Q8R404	MIC13	MIC13	Micos13
Q9CRB9	MIC19	MIC19	Chchd3
Q91VN4	MIC25	MIC25	Chchd6
Q9DCZ4	MIC26	MIC26	Apoo
Q78IK4	MIC27	MIC27	Apool
Q8CAQ8	MIC60	MIC60	Immt
Q8VCX5	MICU1	MICU1	Micu1
Q9CTY5	MICU3	MICU3	Micu3
P34884	MIF	MIF	Mif
Q4QQM5	MIGA1	MIGA1	Miga1
G3X9G2	G3X9G2	MINK1	Mink1
Q8BG51	MIRO1	MIRO1	Rhot1
Q8JZN7	MIRO2	MIRO2	Rhot2
Q3URS9	MITOK	MITOK	Ccdc51
Q9CXJ4	MITOS	MITOS	Abcb8
Q8R3Q6	MIX23	MIX23	Mix23
P63085	MK01	MK01	Mapk1
Q63844	MK03	MK03	Mapk3
Q61831	MK10	MK10	Mapk10
Q3THE2	ML12B	ML12B	Myl12b
Q8VHK5	MLC1	MLC1	Mlc1
Q9D273	MMAB	MMAB	Mmab
Q9EQ20	MMSA	MMSA	Aldh6a1
Q9D2P8	MOBP	MOBP	Mobp
P26041	MOES	MOES	Msn
Q3UY21	Q3UY21	MOG	Mog
P53986	MOT1	MOT1	Slc16a1
D3YXY8	D3YXY8	MP17L	Mpv17l
P31938	MP2K1	MP2K1	Map2k1
P47809	MP2K4	MP2K4	Map2k4
P63030	MPC1	MPC1	Mpc1
Q9D023	MPC2	MPC2	Mpc2
Q9WV34	MPP2	MPP2	Mpp2
Q6XE40	Q6XE40	MPP3	Mpp3
Q9DC61	MPPA	MPPA	Pmpca
Q9CXT8	MPPB	MPPB	Pmpcb
D3YWI4	D3YWI4	MPV17	Mpv17
P28667	MRP	MRP	Marcksl1
Q5NCE8	MRS2	MRS2	Mrs2
A0A1B0GT40	A0A1B0GT40	MSRA	Msra
Q78J03	MSRB2	MSRB2	Msrb2
P02802	MT1	MT1	Mt1
P28184	MT3	MT3	Mt3
A0A668KLC6	A0A668KLC6	MTAP2	Map2
Q791T5	MTCH1	MTCH1	Mtch1
Q791V5	MTCH2	MTCH2	Mtch2
Q9CRB8	MTFP1	MTFP1	Mtfp1
Q6ZPE2	MTMR5	MTMR5	Sbf1
P62774	MTPN	MTPN	Mtpn
D3YWC9	D3YWC9	MTSS2	Mtss2
A0A6I8MWZ8	A0A6I8MWZ8	MTX1	Mtx1
O88441	MTX2	MTX2	Mtx2
P16332	MUTA	MUTA	Mmut
A0A1C7ZN10	A0A1C7ZN10	MY18A	Myo18a
Q3UHK1	MYCT	MYCT	Slc2a13
Q5SV64	Q5SV64	MYH10	Myh10
K3W4R2	K3W4R2	MYH14	Myh14
Q8VDD5	MYH9	MYH9	Myh9
A0A1W2P6F6	A0A1W2P6F6	MYL6	Myl6
F6Z2S4	F6Z2S4	MYO5A	Myo5a
E9PVU0	E9PVU0	MYO6	Myo6
P60202	MYPR	MYPR	Plp1
G3X9J1	G3X9J1	NAC1	Slc8a1
Q8K596	NAC2	NAC2	Slc8a2
Q8C5H8	NAKD2	NAKD2	Nadk2
Q9DB73	NB5R1	NB5R1	Cyb5r1
Q9DCN2	NB5R3	NB5R3	Cyb5r3
Q91X97	NCALD	NCALD	Ncald
E9QB01	E9QB01	NCAM1	Ncam1
O35136	NCAM2	NCAM2	Ncam2
Q9Z0E0	NCDN	NCDN	Ncdn
A2AS98	A2AS98	NCKP1	Nckap1
Q8BUN9	NCKX2	NCKX2	Slc24a2
P37040	NCPR	NCPR	Por
Q8BNY6	NCS1	NCS1	Ncs1
P15532	NDKA	NDKA	Nme1
Q62433	NDRG1	NDRG1	Ndrg1
Q9QYG0	NDRG2	NDRG2	Ndrg2
Q9QYF9	NDRG3	NDRG3	Ndrg3
Q8BTG7	NDRG4	NDRG4	Ndrg4
O35683	NDUA1	NDUA1	Ndufa1
Q9CQ75	NDUA2	NDUA2	Ndufa2
Q9CQ91	NDUA3	NDUA3	Ndufa3
A0A0N4SVQ1	A0A0N4SVQ1	NDUA4	Ndufa4
Q9CPP6	NDUA5	NDUA5	Ndufa5
Q9CQZ5	NDUA6	NDUA6	Ndufa6
Q9Z1P6	NDUA7	NDUA7	Ndufa7
Q9DCJ5	NDUA8	NDUA8	Ndufa8
A0A0R3P9C8	A0A0R3P9C8	NDUA9	Ndufa9
Q99LC3	NDUAA	NDUAA	Ndufa10
G5E814	G5E814	NDUAB	Ndufa11
Q7TMF3	NDUAC	NDUAC	Ndufa12
Q9ERS2	NDUAD	NDUAD	Ndufa13
P0DN34	NDUB1	NDUB1	Ndufb1
Q9CPU2	NDUB2	NDUB2	Ndufb2
Q9CQZ6	NDUB3	NDUB3	Ndufb3
Q9CQC7	NDUB4	NDUB4	Ndufb4
D3Z568	D3Z568	NDUB5	Ndufb5
A2AP32	A2AP32	NDUB6	Ndufb6
Q9CR61	NDUB7	NDUB7	Ndufb7
Q9D6J5	NDUB8	NDUB8	Ndufb8
Q9CQJ8	NDUB9	NDUB9	Ndufb9
Q9DCS9	NDUBA	NDUBA	Ndufb10
O09111	NDUBB	NDUBB	Ndufb11
Q9CQ54	NDUC2	NDUC2	Ndufc2
Q59J78	NDUF2	NDUF2	Ndufaf2
Q9JKL4	NDUF3	NDUF3	Ndufaf3
A2APY7	NDUF5	NDUF5	Ndufaf5
A2AIL4	NDUF6	NDUF6	Ndufaf6
Q9CWG8	NDUF7	NDUF7	Ndufaf7
Q91VD9	NDUS1	NDUS1	Ndufs1
Q91WD5	NDUS2	NDUS2	Ndufs2
Q9DCT2	NDUS3	NDUS3	Ndufs3
E9QPX3	E9QPX3	NDUS4	Ndufs4
B1ARW4	B1ARW4	NDUS5	Ndufs5
A0A1Y7VM38	A0A1Y7VM38	NDUS6	Ndufs6
Q9DC70	NDUS7	NDUS7	Ndufs7
Q8K3J1	NDUS8	NDUS8	Ndufs8
D3YUM1	D3YUM1	NDUV1	Ndufv1
Q9D6J6	NDUV2	NDUV2	Ndufv2
Q8BK30	NDUV3	NDUV3	Ndufv3
Q6R891	NEB2	NEB2	Ppp1r9b
Q9DC07	LNEBL	NEBL	Nebl
P21661	NEC2	NEC2	Pcsk2
Q91ZP9	NECA2	NECA2	Necab2
Q9CR95	NECP1	NECP1	Necap1
A0A494B953	A0A494B953	NED4L	Nedd4l
P29595	NEDD8	NEDD8	Nedd8
A0A4W9	A0A4W9	NEGR1	Negr1
P60761	NEUG	NEUG	Nrgn
A0A286YD12	A0A286YD12	NEUL	Nln
P06837	NEUM	NEUM	Gap43
Q04690	NF1	NF1	Nf1
Q810U3	NFASC	NFASC	Nfasc
P19246	NFH	NFH	Nefh
P08551	NFL	NFL	Nefl
A0A0R4J036	A0A0R4J036	NFM	Nefm
Q9Z1J3	NFS1	NFS1	Nfs1
A0A0N4SUH8	A0A0N4SUH8	NFU1	Nfu1
Q8CHT1	NGEF	NGEF	Ngef
P70441	NHRF1	NHRF1	Slc9a3r1
Q9EQ80	NIF3L	NIF3L	Nif3l1
O55125	NIPS1	NIPS1	Nipsnap1
Q7TMG8	Q7TMG8	NIPS2	Nipsnap2
Q8VDK1	NIT1	NIT1	Nit1
Q9JHW2	NIT2	NIT2	Nit2
E9QK34	E9QK34	NLGN1	Nlgn1
Q69ZK9	NLGN2	NLGN2	Nlgn2
A2AGI2	A2AGI2	NLGN3	Nlgn3
Q3TL44	NLRX1	NLRX1	Nlrx1
P35436	NMDE1	NMDE1	Grin2a
G3X9V4	G3X9V4	NMDE2	Grin2b
A2AI14	A2AI14	NMDZ1	Grin1
J3QMM7	J3QMM7	NNRD	Naxd
Q8K4Z3	NNRE	NNRE	Naxe
A3KGE4	A3KGE4	NOE1	Olfm1
Q3TF41	Q3TF41	NP1L1	Nap1l1
B7ZNL2	B7ZNL2	NP1L4	Nap1l4
Q9CQE1	NPS3B	NPS3B	Nipsnap3b
P97300	NPTN	NPTN	Nptn
Q62443	NPTX1	NPTX1	Nptx1
E9PZM8	E9PZM8	NPTXR	Nptxr
Q64669	NQO1	NQO1	Nqo1
A0A1W2P7Y9	A0A1W2P7Y9	NRCAM	Nrcam
E0CY11	E0CY11	NRX1A	Nrxn1
E9Q2X2	E9Q2X2	NRX3A	Nrxn3
P46460	NSF	NSF	Nsf
Q9CZ44	NSF1C	NSF1C	Nsfl1c
Q9JJY3	NSMA2	NSMA2	Smpd3
A2A9X5	A2A9X5	NT5C	Nt5c
Q3UHB1	NT5D3	NT5D3	Nt5dc3
Q8VCE6	NT5M	NT5M	Nt5m
D3Z396	D3Z396	NTRI	Ntm
P15209	NTRK2	NTRK2	Ntrk2
P03888	NU1M	NU1M	Mtnd1
P03893	NU2M	NU2M	mt-Nd2
P03911	NU4M	NU4M	Mtnd4
P03921	NU5M	NU5M	Mtnd5
Q9CWD8	NUBPL	NUBPL	Nubpl
Q9CWD3	NUD17	NUD17	Nudt17
O35685	NUDC	NUDC	Nudc
O08919	NUMBL	NUMBL	Numbl
P29758	OAT	OAT	Oat
Q9CRD0	OCAD1	OCAD1	Ociad1
Q9D8W7	OCAD2	OCAD2	Ociad2
Q6NVF0	OCRL	OCRL	Ocrl
P53395	ODB2	ODB2	Dbt
Q3U3J1	Q3U3J1	ODBA	Bckdha
Q6P3A8	ODBB	ODBB	Bckdhb
Q60597	ODO1	ODO1	Ogdh
Q9D2G2	ODO2	ODO2	Dlst
Q8BMF4	ODP2	ODP2	Dlat
P35486	ODPA	ODPA	Pdha1
Q9D051	ODPB	ODPB	Pdhb
Q8BKZ9	ODPX	ODPX	Pdhx
Q8CGY8	OGT1	OGT1	Ogt
B1AYJ9	B1AYJ9	OLA1	Ola1
G3XA53	G3XA53	OMGP	Omg
Q64288	OMP	OMP	Omp
P58281	OPA1	OPA1	Opa1
Q505D7	OPA3	OPA3	Opa3
Q9D8S4	ORN	ORN	Rexo2
A0A3Q4EG54	A0A3Q4EG54	OSBL1	Osbpl1a
Q3B7Z2	OSBP1	OSBP1	Osbp
O54734	OST48	OST48	Ddost
Q7TQI3	OTUB1	OTUB1	Otub1
E9PZI9	E9PZI9	OX2G	Cd200
Q8VE38	OXND1	OXND1	Oxnad1
Q4KMM3	OXR1	OXR1	Oxr1
Q9D404	OXSM	OXSM	Oxsm
Q922Q4	P5CR2	P5CR2	Pycr2
Q9DCC4	P5CR3	P5CR3	Pycr3
Q9Z110	P5CS	P5CS	Aldh18a1
A0A1L1SVK0	A0A1L1SVK0	PA1B2	Pafah1b2
P50580	PA2G4	PA2G4	Pa2g4
P29341	PABP1	PABP1	Pabpc1
Q61644	PACN1	PACN1	Pacsin1
Q9WVE8	PACN2	PACN2	Pacsin2
Q8K212	PACS1	PACS1	Pacs1
Q08642	PADI2	PADI2	Padi2
O88643	PAK1	PAK1	Pak1
Q9Z0P4	PALM	PALM	Palm
Q8BR92	PALM2	PALM2	Palm2
Q9JLB0	PALS2	PALS2	Pals2
Q99LX0	PARK7	PARK7	Park7
P60335	PCBP1	PCBP1	Pcbp1
Q91ZA3	PCCA	PCCA	Pcca
Q99MN9	PCCB	PCCB	Pccb
A0A0R4J0G0	A0A0R4J0G0	PCKGM	Pck2
Q9QYX7	PCLO	PCLO	Pclo
Q9QXV0	PCS1N	PCS1N	Pcsk1n
F7CIP8	F7CIP8	PCYOX	Pcyox1
Q9WU78	PDC6I	PDC6I	Pdcd6ip
P56812	PDCD5	PDCD5	Pdcd5
P12815	PDCD6	PDCD6	Pdcd6
A0A384DV92	A0A384DV92	PDE10	Pde10a
A0A1B0GRJ9	A0A1B0GRJ9	PDE2A	Pde2a
P09103	PDIA1	PDIA1	P4hb
P27773	PDIA3	PDIA3	Pdia3
Q3TML0	Q3TML0	PDIA6	Pdia6
F6SQH7	F6SQH7	PDIP2	Poldip2
Q8BFP9	PDK1	PDK1	Pdk1
Q9JK42	PDK2	PDK2	Pdk2
Q922H2	PDK3	PDK3	Pdk3
A2AJP9	A2AJP9	PDP1	Pdp1
F2Z3X6	F2Z3X6	PDPK1	Pdpk1
Q7TSQ8	PDPR	PDPR	Pdpr
Q8K183	PDXK	PDXK	Pdxk
Q62048	PEA15	PEA15	Pea15
P70296	PEBP1	PEBP1	Pebp1
Q8BFY6	PEF1	PEF1	Pef1
B1AZQ0	B1AZQ0	PENK	Penk
D3YYH0	D3YYH0	PEX5R	Pex5l
P12382	PFKAL	PFKAL	Pfkl
P47857	PFKAM	PFKAM	Pfkm
Q8C605	Q8C605	PFKAP	Pfkp
Q9DBJ1	PGAM1	PGAM1	Pgam1
Q8BX10	PGAM5	PGAM5	Pgam5
Q61361	PGCB	PGCB	Bcan
Q8BWM0	PGES2	PGES2	Ptges2
P09411	PGK1	PGK1	Pgk1
A2CEK3	A2CEK3	PGM1	Pgm1
Q8CAA7	PGM2L	PGM2L	Pgm2l1
Q8CHP8	PGP	PGP	Pgp
Q8BHF7	PGPS1	PGPS1	Pgs1
O55022	PGRC1	PGRC1	Pgrmc1
Q80UU9	PGRC2	PGRC2	Pgrmc2
Q9JHK4	PGTA	PGTA	Rabggta
P67778	PHB1	PHB1	Phb1
O35129	PHB2	PHB2	Phb2
Q80TL4	PHF24	PHF24	Phf24
Q8BGT8	PHIPL	PHIPL	Phyhipl
Q9DAK9	PHP14	PHP14	Phpt1
Q8K0S0	PHYIP	PHYIP	Phyhip
O70172	PI42A	PI42A	Pip4k2a
Q91XU3	PI42C	PI42C	Pip4k2c
E9Q3L2	PI4KA	PI4KA	Pi4ka
F8WHW6	F8WHW6	PI51C	Pip5k1c
Q7M6Y3	PICAL	PICAL	Picalm
E0CYV0	E0CYV0	PIMT	Pcmt1
Q9QUR7	PIN1	PIN1	Pin1
P53810	PIPNA	PIPNA	Pitpna
D3YZT7	D3YZT7	PKHB1	Plekhb1
A2AS45	A2AS45	PKP4	Pkp4
Q02257	PLAK	PLAK	Jup
A0A0R4J263	A0A0R4J263	PLCA	Agpat1
Q9Z1B3	PLCB1	PLCB1	Plcb1
Q9D1E8	PLCE	PLCE	Agpat5
Q8K394	PLCL2	PLCL2	Plcl2
G3X9A7	G3X9A7	PLCX3	Plcxd3
Q9QXS1	PLEC	PLEC	Plec
Q9DCU2	PLLP	PLLP	Pllp
Q9Z2Y8	PLPHP	PLPHP	Plpbp
E9PXB0	E9PXB0	PLPL8	Pnpla8
P60487	PLPP	PLPP	Pdxp
Q99JY8	PLPP3	PLPP3	Plpp3
A0A0G2JGY9	A0A0G2JGY9	PLPR4	Plppr4
A0A1C7CYV0	A0A1C7CYV0	PLST	Pls3
P70206	PLXA1	PLXA1	Plxna1
Q80UG2	PLXA4	PLXA4	Plxna4
Q8CJH3	PLXB1	PLXB1	Plxnb1
A0A0R4J1J1	A0A0R4J1J1	PNKD	Pnkd
Q543K9	Q543K9	PNPH	Pnp
P62137	PP1A	PP1A	Ppp1ca
P62141	PP1B	PP1B	Ppp1cb
Q3UM45	PP1R7	PP1R7	Ppp1r7
P62715	PP2AB	PP2AB	Ppp2cb
P63328	PP2BA	PP2BA	Ppp3ca
E0CZ78	E0CZ78	PP2BB	Ppp3cb
Q8BP40	PPA6	PPA6	Acp6
Q9D358	PPAC	PPAC	Acp1
Q9QUR6	PPCE	PPCE	Prep
P17742	PPIA	PPIA	Ppia
P24369	PPIB	PPIB	Ppib
Q9CR16	PPID	PPID	Ppid
Q99KR7	PPIF	PPIF	Ppif
Q80TL0	PPM1E	PPM1E	Ppm1e
Q3UYC0	PPM1H	PPM1H	Ppm1h
P51175	PPOX	PPOX	Ppox
F7BX26	F7BX26	PPP5	Ppp5c
Q60829	PPR1B	PPR1B	Ppp1r1b
O88531	PPT1	PPT1	Ppt1
Q6NVE9	PPTC7	PPTC7	Pptc7
Q8R5J9	PRAF3	PRAF3	Arl6ip5
P35700	PRDX1	PRDX1	Prdx1
Q61171	PRDX2	PRDX2	Prdx2
P20108	PRDX3	PRDX3	Prdx3
P99029	PRDX5	PRDX5	Prdx5
Q6GT24	Q6GT24	PRDX6	Prdx6
Q8K411	PREP	PREP	Pitrm1
Q69ZK0	PREX1	PREX1	Prex1
P04925	PRIO	PRIO	Prnp
Q9WU79	PROD	PROD	Prodh
P62962	PROF1	PROF1	Pfn1
Q9JJV2	PROF2	PROF2	Pfn2
E9PUL5	PRRT2	PRRT2	Prrt2
A0A0N4SVB5	A0A0N4SVB5	PRRT3	Prrt3
P32848	PRVA	PRVA	Pvalb
Q11011	PSA	PSA	Npepps
Q9R1P4	PSA1	PSA1	Psma1
P49722	PSA2	PSA2	Psma2
E0CX62	E0CX62	PSA3	Psma3
Q9Z2U1	PSA5	PSA5	Psma5
E0CXB1	E0CXB1	PSA6	Psma6
A0A338P7F1	A0A338P7F1	PSB1	Psmb1
O55234	PSB5	PSB5	Psmb5
Q60692	PSB6	PSB6	Psmb6
G3UYH2	G3UYH2	PSD11	Psmd11
Q3TRH2	Q3TRH2	PSD12	Psmd12
E9Q5I9	E9Q5I9	PSD13	Psmd13
E9PUC5	E9PUC5	PSD3	Psd3
O35593	PSDE	PSDE	Psmd14
Q8VDM4	PSMD2	PSMD2	Psmd2
Q99JI4	PSMD6	PSMD6	Psmd6
P26516	PSMD7	PSMD7	Psmd7
Q3TG45	Q3TG45	PSMD8	Psmd8
Q14C51	PTCD3	PTCD3	Ptcd3
Q8BGC4	PTGR3	PTGR3	Ptgr3
P35235	PTN11	PTN11	Ptpn11
P58389	PTPA	PTPA	Ptpa
A0A7N9VS33	A0A7N9VS33	PTPM1	Ptpmt1
P80560	PTPR2	PTPR2	Ptprn2
Q91V35	Q91V35	PTPRA	Ptpra
B9EJA3	B9EJA3	PTPRD	Ptprd
A6MDD2	A6MDD2	PTPRN	Ptprn
B0V2N1	PTPRS	PTPRS	Ptprs
A0A0J9YVD2	A0A0J9YVD2	PTPRZ	Ptprz1
Q64737	PUR2	PUR2	Gart
Q9DCL9	PUR6	PUR6	Paics
Q9CWJ9	PUR9	PUR9	Atic
P42669	PURA	PURA	Pura
P46664	PURA2	PURA2	Adss2
O35295	PURB	PURB	Purb
Q3U125	Q3U125	PXL2A	Prxl2a
Q9DB60	PXL2B	PXL2B	Prxl2b
G5E8R3	G5E8R3	PYC	Pcx
Q8CI94	PYGB	PYGB	Pygb
Q9WUB3	PYGM	PYGM	Pygm
O35435	PYRD	PYRD	Dhodh
Q0VF55	Q0VF55	Q0VF55	Atp2b3
Q3V460	Q3V460	Q3V460	Smim26
Q6DFY2	Q6DFY2	Q6DFY2	Opcml
Q7TNL5	Q7TNL5	Q7TNL5	Ppp2r5d
Q91VA7	Q91VA7	Q91VA7	Idh3b
Q9D6D0	Q9D6D0	Q9D6D0	Slc25a27
Q9D881	Q9D881	Q9D881	Cox5b-ps
Q9JKY7	Q9JKY7	Q9JKY7	Cyp2d22
Q9Z1R9	Q9Z1R9	Q9Z1R9	Prss1
Q9CZ13	QCR1	QCR1	Uqcrc1
Q9CPX8	QCR10	QCR10	Uqcr11
Q9DB77	QCR2	QCR2	Uqcrc2
P99028	QCR6	QCR6	Uqcrh
Q9CQB4	Q9CQB4	QCR7	Uqcrb
Q9CQ69	QCR8	QCR8	Uqcrq
Q8R1I1	QCR9	QCR9	Uqcr10
Q3UNZ8	QORL2	QORL2	Cryzl2
P61027	RAB10	RAB10	Rab10
A2CG35	A2CG35	RAB12	Rab12
Q91V41	RAB14	RAB14	Rab14
Q3TYH2	Q3TYH2	RAB15	Rab15
A0A3Q4EI12	A0A3Q4EI12	RAB18	Rab18
Q9D1G1	RAB1B	RAB1B	Rab1b
P35282	RAB21	RAB21	Rab21
Q9D4I9	Q9D4I9	RAB23	Rab23
P35290	RAB24	RAB24	Rab24
P53994	RAB2A	RAB2A	Rab2a
P59279	RAB2B	RAB2B	Rab2b
Q6PHN9	RAB35	RAB35	Rab35
P63011	RAB3A	RAB3A	Rab3a
A2A7Z6	A2A7Z6	RAB3B	Rab3b
P62823	RAB3C	RAB3C	Rab3c
Q9CQD1	RAB5A	RAB5A	Rab5a
P61021	RAB5B	RAB5B	Rab5b
P35278	RAB5C	RAB5C	Rab5c
P61294	RAB6B	RAB6B	Rab6b
P51150	RAB7A	RAB7A	Rab7a
P61028	RAB8B	RAB8B	Rab8b
Q8BHH2	RAB9B	RAB9B	Rab9b
Q5U3K5	RABL6	RABL6	Rabl6
P63001	RAC1	RAC1	Rac1
P68040	RACK1	RACK1	Rack1
A0A5F8MPB9	A0A5F8MPB9	RADI	Rdx
P63321	RALA	RALA	Rala
H7BX22	H7BX22	RANG	Ranbp1
P62835	RAP1A	RAP1A	Rap1a
Q80ZJ1	RAP2A	RAP2A	Rap2a
P61226	RAP2B	RAP2B	Rap2b
Q61411	RASH	RASH	Hras
P32883	RASK	RASK	Kras
Q9Z268	RASL1	RASL1	Rasal1
O08989	RASM	RASM	Mras
P46638	RB11B	RB11B	Rab11b
Q99P58	RB27B	RB27B	Rab27b
O35963	RB33B	RB33B	Rab33b
Q8BHC1	RB39B	RB39B	Rab39b
Q8BP92	RCN2	RCN2	Rcn2
P54728	RD23B	RD23B	Rad23b
Q9ERI6	RDH14	RDH14	Rdh14
Q8VCD6	REEP2	REEP2	Reep2
G3X8R0	G3X8R0	REEP5	Reep5
A0A087WSS1	A0A087WSS1	RELCH	Relch
Q8CHX7	RFTN2	RFTN2	Rftn2
A0A087WNZ9	A0A087WNZ9	RGS6	Rgs6
Q80XD3	Q80XD3	RGS7	Rgs7
Q5FWK3	RHG01	RHG01	Arhgap1
Q5SSM3	RHG44	RHG44	Arhgap44
A0A0A6YXF6	A0A0A6YXF6	RHOA	Rhoa
P62746	RHOB	RHOB	Rhob
P84096	RHOG	RHOG	Rhog
P52760	RIDA	RIDA	Rida
A0A0G2JFB0	A0A0G2JFB0	RIMB2	Rimbp2
F6TZK4	F6TZK4	RIMS1	Rims1
Q6ZWV3	RL10	RL10	Rpl10
A0A3B2WBL1	A0A3B2WBL1	RL10A	Rpl10a
Q9CXW4	RL11	RL11	Rpl11
P35979	RL12	RL12	Rpl12
P47963	RL13	RL13	Rpl13
Q9CR57	RL14	RL14	Rpl14
Q9CZM2	RL15	RL15	Rpl15
Q6ZWZ7	Q6ZWZ7	RL17	Rpl17
A0A1B0GQU8	A0A1B0GQU8	RL18	Rpl18
A0A1D5RLW5	A0A1D5RLW5	RL18A	Rpl18a
A2A547	A2A547	RL19	Rpl19
O09167	RL21	RL21	Rpl21
P67984	RL22	RL22	Rpl22
P62751	RL23A	RL23A	Rpl23a
Q8BP67	RL24	RL24	Rpl24
B1ARA3	B1ARA3	RL26	Rpl26
P61358	RL27	RL27	Rpl27
P14115	RL27A	RL27A	Rpl27a
P41105	RL28	RL28	Rpl28
P27659	RL3	RL3	Rpl3
A0A2I3BQF4	A0A2I3BQF4	RL30	Rpl30
A0A0G2JEY6	A0A0G2JEY6	RL34	Rpl34
Q6ZWZ4	Q6ZWZ4	RL36	Rpl36
Q9D8E6	RL4	RL4	Rpl4
P47962	RL5	RL5	Rpl5
P47911	RL6	RL6	Rpl6
P14148	RL7	RL7	Rpl7
P12970	RL7A	RL7A	Rpl7a
P62918	RL8	RL8	Rpl8
P14869	RLA0	RLA0	Rplp0
P47955	RLA1	RLA1	Rplp1
P99027	RLA2	RLA2	Rplp2
Q99N96	RM01	RM01	Mrpl1
D3Z456	D3Z456	RM03	Mrpl3
Q9DCU6	RM04	RM04	Mrpl4
Q3TBW2	RM10	RM10	Mrpl10
Q9CQF0	RM11	RM11	Mrpl11
Q9DB15	RM12	RM12	Mrpl12
Q99N93	RM16	RM16	Mrpl16
Q9D338	RM19	RM19	Mrpl19
Q8BU88	RM22	RM22	Mrpl22
Q9CQ06	RM24	RM24	Mrpl24
Q9D1B9	RM28	RM28	Mrpl28
Q921S7	RM37	RM37	Mrpl37
Q8K2M0	RM38	RM38	Mrpl38
Q9JKF7	RM39	RM39	Mrpl39
Q9CQN7	RM41	RM41	Mrpl41
Q9CY73	RM44	RM44	Mrpl44
Q9D0Q7	RM45	RM45	Mrpl45
Q9EQI8	RM46	RM46	Mrpl46
A0A140LHT6	A0A140LHT6	RM48	Mrpl48
Q9CQ40	RM49	RM49	Mrpl49
Q8VDT9	RM50	RM50	Mrpl50
Q9D1H8	RM53	RM53	Mrpl53
Q9CPW3	RM54	RM54	Mrpl54
Q3UJU9	RMD3	RMD3	Rmdn3
Q9JI90	RNF14	RNF14	Rnf14
A0A1B0GSG5	A0A1B0GSG5	RNH1	Rnh1
A0A0N4SUM2	A0A0N4SUM2	ROA2	Hnrnpa2b1
A0A1Y7VMN0	A0A1Y7VMN0	ROCK2	Rock2
Q3TDK6	ROGDI	ROGDI	Rogdi
P47708	RP3A	RP3A	Rph3a
A2ASW8	A2ASW8	RPGF4	Rapgef4
A2ALS5	RPGP1	RPGP1	Rap1gap
Q91YQ5	RPN1	RPN1	Rpn1
A2ACG7	A2ACG7	RPN2	Rpn2
J3QMX0	J3QMX0	RPP14	Rpp14
Q9D6S7	RRFM	RRFM	Mrrf
A0A1B0GSE8	A0A1B0GSE8	RS11	Rps11
F7AEH4	F7AEH4	RS12	Rps12
Q921R2	Q921R2	RS13	Rps13
P62264	RS14	RS14	Rps14
P62245	RS15A	RS15A	Rps15a
P63276	RS17	RS17	Rps17
D3YUG3	D3YUG3	RS19	Rps19
P25444	RS2	RS2	Rps2
P60867	RS20	RS20	Rps20
P62908	RS3	RS3	Rps3
P97351	RS3A	RS3A	Rps3a
P62702	RS4X	RS4X	Rps4x
Q91V55	Q91V55	RS5	Rps5
P62754	RS6	RS6	Rps6
P62082	RS7	RS7	Rps7
P62242	RS8	RS8	Rps8
Q6ZWN5	RS9	RS9	Rps9
P14206	RSSA	RSSA	Rpsa
Q924T2	RT02	RT02	Mrps2
Q99N87	RT05	RT05	Mrps5
P58064	RT06	RT06	Mrps6
Q80X85	RT07	RT07	Mrps7
Q9D7N3	RT09	RT09	Mrps9
Q3U8Y1	Q3U8Y1	RT11	Mrps11
Q9CXW2	RT22	RT22	Mrps22
F7ARZ1	F7ARZ1	RT23	Mrps23
Q8BK72	RT27	RT27	Mrps27
Q9CY16	RT28	RT28	Mrps28
G3X9M0	G3X9M0	RT29	Dap3
Q9D0G0	RT30	RT30	Mrps30
Q61733	RT31	RT31	Mrps31
Q9JIK9	RT34	RT34	Mrps34
A0A0R4J0L6	A0A0R4J0L6	RT35	Mrps35
A0A0R4J0S3	A0A0R4J0S3	RT4I1	Rtn4ip1
Q8K0T0	RTN1	RTN1	Rtn1
Q9ES97	RTN3	RTN3	Rtn3
Q99P72	RTN4	RTN4	Rtn4
A0A0G2JFT8	A0A0G2JFT8	RUFY3	Rufy3
F6U7V1	F6U7V1	RYR2	Ryr2
P50114	S100B	S100B	S100b
Q91V77	Q91V77	S10A1	S100a1
P63084	S10A5	S10A5	S100a5
E9QM38	E9QM38	S12A2	Slc12a2
A0A076FR46	A0A076FR46	S12A5	Slc12a5
Q3V0N8	Q3V0N8	S12A6	Slc12a6
Q99J08	S14L2	S14L2	Sec14l2
Q3UHH2	S22AN	S22AN	Slc22a23
Q8BH59	S2512	S2512	Slc25a12
Q9QXX4	S2513	S2513	Slc25a13
Q3TZX3	S2533	S2533	Slc25a33
Q8BGP6	S2540	S2540	Slc25a40
Q9CQS4	S2546	S2546	Slc25a46
A2AKW0	A2AKW0	S2551	Slc25a51
Q8VEM8	MPCP	S25A3	Slc25a3
Q60714	S27A1	S27A1	Slc27a1
Q91VE0	S27A4	S27A4	Slc27a4
A0A0A6YWF5	A0A0A6YWF5	S38A3	Slc38a3
A0A087WQF7	A0A087WQF7	S39AA	Slc39a10
Q5DTL9	S4A10	S4A10	Slc4a10
E9Q8N8	E9Q8N8	S4A4	Slc4a4
P31650	S6A11	S6A11	Slc6a11
A0A0R4J087	A0A0R4J087	S6A17	Slc6a17
Q8BXR1	S7A14	S7A14	Slc7a14
Q9EP69	SAC1	SAC1	Sacm1l
P50247	SAHH	SAHH	Ahcy
Q80SW1	SAHH2	SAHH2	Ahcyl1
F8WGT1	F8WGT1	SAHH3	Ahcyl2
Q8BGH2	SAM50	SAM50	Samm50
J3QPG5	J3QPG5	SAP	Psap
A0A1W2P6N3	A0A1W2P6N3	SAR1A	Sar1a
Q99LB7	SARDH	SARDH	Sardh
O35874	SATT	SATT	Slc1a4
O08547	SC22B	SC22B	Sec22b
E9Q1S3	E9Q1S3	SC23A	Sec23a
P31648	SC6A1	SC6A1	Slc6a1
Q6PGE7	SC6A7	SC6A7	Slc6a7
E9Q3V0	E9Q3V0	SC6A9	Slc6a9
Q8C8N2	SCAI	SCAI	Scai
Q8K021	SCAM1	SCAM1	Scamp1
Q3UXS0	Q3UXS0	SCAM3	Scamp3
Q9JKD3	SCAM5	SCAM5	Scamp5
P16014	SCG1	SCG1	Chgb
Q4W8U9	Q4W8U9	SCG2	Scg2
A2ASZ8	SCMC2	SCMC2	Slc25a25
Q6GQS1	SCMC3	SCMC3	Slc25a23
P97952	SCN1B	SCN1B	Scn1b
A0A5H1ZRM8	A0A5H1ZRM8	SCN2A	Scn2a
Q56A07	SCN2B	SCN2B	Scn2b
Q5SUC9	SCO1	SCO1	Sco1
Q9D0K2	SCOT1	SCOT1	Oxct1
P32020	SCP2	SCP2	Scp2
Q8R127	SCPDL	SCPDL	Sccpdh
O35114	SCRB2	SCRB2	Scarb2
Q9CZC8	SCRN1	SCRN1	Scrn1
G5E8J9	G5E8J9	SCYL2	Scyl2
Q8K2B3	SDHA	SDHA	Sdha
Q9CQA3	SDHB	SDHB	Sdhb
A0A0J9YTY0	A0A0J9YTY0	SEPT11	Septin11
P42208	SEPT2	SEPT2	Septin2
Q9Z1S5	SEPT3	SEPT3	Septin3
A0A5F8MP96	A0A5F8MP96	SEPT4	Septin4
Q9R1T4	SEPT6	SEPT6	Septin6
E9Q1G8	E9Q1G8	SEPT7	Septin7
B7ZC46	B7ZC46	SEPT8	Septin8
A2A6U3	A2A6U3	SEPT9	Septin9
Q61753	SERA	SERA	Phgdh
Q99K85	SERC	SERC	Psat1
Q9QZI8	SERC1	SERC1	Serinc1
Q99JR1	SFXN1	SFXN1	Sfxn1
Q91V61	SFXN3	SFXN3	Sfxn3
Q8BRQ9	Q8BRQ9	SFXN5	Sfxn5
Q8VD37	SGIP1	SGIP1	Sgip1
B2RQR5	B2RQR5	SGSM1	Sgsm1
Q9CX34	SGT1	SGT1	Sugt1
Q8BJU0	SGTA	SGTA	Sgta
Q62419	SH3G1	SH3G1	Sh3gl1
A2ALV3	A2ALV3	SH3G2	Sh3gl2
A0A0R4J0B8	A0A0R4J0B8	SH3G3	Sh3gl3
Q9JJU8	SH3L1	SH3L1	Sh3bgrl
Q91VW3	SH3L3	SH3L3	Sh3bgrl3
D3YZU4	D3YZU4	SHAN1	Shank1
D3Z5K8	D3Z5K8	SHAN2	Shank2
Q4ACU6	SHAN3	SHAN3	Shank3
A0A0G2JEC4	A0A0G2JEC4	SHLB1	Sh3glb1
A2AWI7	A2AWI7	SHLB2	Sh3glb2
P97797	SHPS1	SHPS1	Sirpa
Q8C3Q5	SHSA7	SHSA7	Shisa7
A0A140LHL5	A0A140LHL5	SIR2	Sirt2
Q8K2C6	SIR5	SIR5	Sirt5
Q9WTX5	SKP1	SKP1	Skp1
A2AQ25	SKT	SKT	Skt
Q61165	SL9A1	SL9A1	Slc9a1
F8WHU8	F8WHU8	SLIRP	Slirp
Q91VZ6	SMAP1	SMAP1	Smap1
Q9DB05	SNAA	SNAA	Napa
P28663	SNAB	SNAB	Napb
D3Z4B2	D3Z4B2	SNAG	Napg
Q3TJ56	Q3TJ56	SND1	Snd1
O55100	SNG1	SNG1	Syngr1
Q8R191	SNG3	SNG3	Syngr3
P60879	SNP25	SNP25	Snap25
Q8R570	SNP47	SNP47	Snap47
Q80U23	SNPH	SNPH	Snph
Q6NZD2	Q6NZD2	SNX1	Snx1
O70493	SNX12	SNX12	Snx12
Q3UHD6	SNX27	SNX27	Snx27
Q78ZM0	Q78ZM0	SNX3	Snx3
Q91YJ2	SNX4	SNX4	Snx4
Q9D8U8	SNX5	SNX5	Snx5
P08228	SODC	SODC	Sod1
P09671	SODM	SODM	Sod2
Q6NZL0	SOGA3	SOGA3	Soga3
Q6P069	SORCN	SORCN	Sri
F8WIV2	F8WIV2	SPB6	Serpinb6a
D3YXB7	D3YXB7	SPG7	Spg7
Q9ESJ4	SPN90	SPN90	Nckipsd
Q91XH5	Q91XH5	SPRE	Spr
Q91WK1	SPRY4	SPRY4	Spryd4
Q62261	SPTB2	SPTB	Sptbn1
Q3UGX2	Q3UGX2	SPTB1	Sptb
Q68FG2	Q68FG2	SPTB2	Sptbn2
A3KGU7	A3KGU7	SPTN1	Sptan1
Q9R112	SQOR	SQOR	Sqor
A0A286YCI8	A0A286YCI8	SRBS1	Sorbs1
A0A0R4J1T1	A0A0R4J1T1	SRBS2	Sorbs2
Q60598	SRC8	SRC8	Cttn
B1AQX6	B1AQX6	SRCN1	Srcin1
A0A087WNM1	A0A087WNM1	SRGP2	Srgap2
F8VPQ4	F8VPQ4	SRGP3	Srgap3
Q64674	SPEE	SRMS	Srm
Q9QZX7	SRR	SRR	Srr
Q8R2K3	Q8R2K3	SSBP	Ssbp1
Q8BWF0	SSDH	SSDH	Aldh5a1
P63046	ST4A1	ST4A1	Sult4a1
Q5DQR4	STB5L	STB5L	Stxbp5l
Q60864	STIP1	STIP1	Stip1
A2AD84	A2AD84	STK26	Stk26
Q99JB2	STML2	STML2	Stoml2
P54227	STMN1	STMN1	Stmn1
F8WH41	F8WH41	STRN	Strn
A0A1B0GS08	A0A1B0GS08	STUM	Stum
Q9ER00	STX12	STX12	Stx12
O35526	STX1A	STX1A	Stx1a
P61264	STX1B	STX1B	Stx1b
Q9JKK1	STX6	STX6	Stx6
O08599	STXB1	STXB1	Stxbp1
D3Z079	D3Z079	STXB5	Stxbp5
Q3TYA4	Q3TYA4	STXB6	Stxbp6
Q9WUM5	SUCA	SUCA	Suclg1
Q9Z2I9	SUCB1	SUCB1	Sucla2
Q9Z2I8	SUCB2	SUCB2	Suclg2
Q8R086	SUOX	SUOX	Suox
A0A0A6YVR9	A0A0A6YVR9	SURF1	Surf1
Q80YD1	SUV3	SUV3	Supv3l1
Q9JIS5	SV2A	SV2A	Sv2a
Q8BG39	SV2B	SV2B	Sv2b
A2RSH4	A2RSH4	SV2C	Sv2c
Q8BGQ7	SYAC	SYAC	Aars1
G3X975	G3X975	SYCM	Cars2
Q922B2	SYDC	SYDC	Dars1
Q8BIP0	SYDM	SYDM	Dars2
A0A0A6YVS6	A0A0A6YVS6	SYGP1	Syngap1
Q8BIJ6	SYIM	SYIM	Iars2
Q8R2P8	Q8R2P8	SYK	Kars
O88935	SYN1	SYN1	Syn1
Q64332	SYN2	SYN2	Syn2
Q8JZP2	SYN3	SYN3	Syn3
A0A494BB89	A0A494BB89	SYNC	Nars
A0A1L1STC6	A0A1L1STC6	SYNE1	Syne1
D3Z656	D3Z656	SYNJ1	Synj1
Q8CC35	SYNPO	SYNPO	Synpo
A0A286YDB6	A0A286YDB6	SYNPR	Synpr
Q62277	SYPH	SYPH	Syp
O09117	SYPL1	SYPL1	Sypl1
A8Y5T6	A8Y5T6	SYPM	Pars2
Q8C483	Q8C483	SYSC	Sars
Q9JJL8	SYSM	SYSM	Sars2
P46096	SYT1	SYT1	Syt1
Q920N7	SYT12	SYT12	Syt12
A0A0R4J2C2	A0A0R4J2C2	SYT2	Syt2
G3X9Y1	G3X9Y1	SYT3	Syt3
A0A494BB44	A0A494BB44	SYT7	Syt7
O55042	SYUA	SYUA	Snca
Q91ZZ3	SYUB	SYUB	Sncb
G3UZ22	G3UZ22	SYVC	Vars
P32921	SYWC	SYWC	Wars1
Q91WQ3	SYYC	SYYC	Yars1
Q8BYL4	SYYM	SYYM	Yars2
Q9D8Y1	T126A	T126A	Tmem126a
Q8K0Z7	TACO1	TACO1	Taco1
Q9R1Q8	TAGL3	TAGL3	Tagln3
A0A1B0GR11	A0A1B0GR11	TALDO	Taldo1
Q3TUH1	TAM41	TAM41	Tamm41
A0A0A0MQC7	A0A0A0MQC7	TAU	Mapt
P68369	TBA1A	TBA1A	Tuba1a
A0A0A0MQA5	A0A0A0MQA5	TBA4A	Tuba4a
Q7TMM9	TBB2A	TBB2A	Tubb2a
Q9CWF2	TBB2B	TBB2B	Tubb2b
Q9ERD7	TBB3	TBB3	Tubb3
Q9D6F9	TBB4A	TBB4A	Tubb4a
P68372	TBB4B	TBB4B	Tubb4b
P99024	TBB5	TBB5	Tubb5
A0A0J9YUB2	A0A0J9YUB2	TBC24	Tbc1d24
P11983	TCPA	TCPA	Tcp1
P80314	TCPB	TCPB	Cct2
G5E839	G5E839	TCPD	Cct4
P80316	TCPE	TCPE	Cct5
P80318	TCPG	TCPG	Cct3
P80313	TCPH	TCPH	Cct7
P42932	TCPQ	TCPQ	Cct8
Q80VP0	TCPR1	TCPR1	Tecpr1
Q52KG9	Q52KG9	TCPZ	Cct6a
P63028	TCTP	TCTP	Tpt1
A0A0G2JE08	A0A0G2JE08	TDRKH	Tdrkh
Q9R0Q7	TEBP	TEBP	Ptges3
G3UWE1	G3UWE1	TECR	Tecr
Q8BYI9	TENR	TENR	Tnr
Q01853	TERA	TERA	Vcp
A0A0R4J088	A0A0R4J088	TF	F3
A0A0R4J1N9	A0A0R4J1N9	TFAM	Tfam
Q62351	TFR1	TFR1	Tfrc
Q3UUI3	THEM4	THEM4	Them4
Q8CAY6	THIC	THIC	Acat2
Q921H8	THIKA	THIKA	Acaa1a
Q8QZT1	THIL	THIL	Acat1
Q8BWT1	THIM	THIM	Acaa2
P10639	THIO	THIO	Txn
G3UZY2	G3UZY2	THIOM	Txn2
Q8BH55	THNS1	THNS1	Thnsl1
Q99J99	THTM	THTM	Mpst
P52196	THTR	THTR	Tst
A0A1L1SUX8	A0A1L1SUX8	THY1	Thy1
P62075	TIM13	TIM13	Timm13
Z4YN86	Z4YN86	TIM22	Timm22
Q8BGX2	TIM29	TIM29	Timm29
O35857	TIM44	TIM44	Timm44
Q9D880	TIM50	TIM50	Timm50
Q9WVA2	TIM8A	TIM8A	Timm8a1
P62077	TIM8B	TIM8B	Timm8b
Q9WV98	TIM9	TIM9	Timm9
Q99KW9	TIP	TIP	Itfg1
P40142	TKT	TKT	Tkt
E9PUM4	E9PUM4	TLN2	Tln2
Q8C996	TM163	TM163	Tmem163
Q8BPE4	TM177	TM177	Tmem177
Q9CR76	TM186	TM186	Tmem186
Q5SRX1	TM1L2	TM1L2	Tom1l2
Q5F285	TM256	TM256	Tmem256
D3YXS8	D3YXS8	TM40L	Tomm40l
Q9D1D4	TMEDA	TMEDA	Tmed10
Q8BK08	TMM11	TMM11	Tmem11
A0A0R4J1Z3	A0A0R4J1Z3	TMM33	Tmem33
Q4VAE3	TMM65	TMM65	Tmem65
Q9JKK7	TMOD2	TMOD2	Tmod2
D3Z2J6	D3Z2J6	TMX2	Tmx2
Q8BXZ1	TMX3	TMX3	Tmx3
A2ARI0	A2ARI0	TMX4	Tmx4
B2RQ80	B2RQ80	TNIK	Tnik
Q9QZ06	TOLIP	TOLIP	Tollip
Q3UDC3	Q3UDC3	TOM1	Tom1
Q9DCC8	TOM20	TOM20	Tomm20
Q9CPQ3	TOM22	TOM22	Tomm22
Q9QYA2	TOM40	TOM40	Tomm40
B1AXP6	TOM5	TOM5	Tomm5
Q9D173	TOM7	TOM7	Tomm7
Q9CZW5	TOM70	TOM70	Tomm70
Q9DAM5	TPC	TPC	Slc25a19
D3Z125	D3Z125	TPD52	Tpd52
P17751	TPIS	TPIS	Tpi1
G5E8R0	G5E8R0	TPM1	Tpm1
O89023	TPP1	TPP1	Tpp1
Q64514	TPP2	TPP2	Tpp2
O55013	TPPC3	TPPC3	Trappc3
Q7TQD2	TPPP	TPPP	Tppp
Q9CRB6	TPPP3	TPPP3	Tppp3
Q9DBS2	TPRGL	TPRGL	Tprg1l
Q3UHJ1	Q3UHJ1	TRAF3	Traf3
Q9CQN1	TRAP1	TRAP1	Trap1
Q3UHH4	Q3UHH4	TRIM2	Trim2
Q3TDT0	Q3TDT0	TRIM3	Trim3
Q0KL02	TRIO	TRIO	Trio
Q8K1J6	TRNT1	TRNT1	Trnt1
Q9JMH6	TRXR1	TRXR1	Txnrd1
A0A0M3HEQ0	A0A0M3HEQ0	TRXR2	Txnrd2
A0A0G2JDX4	A0A0G2JDX4	TSN2	Tspan2
Q3UHG5	Q3UHG5	TSN7	Tspan7
Z4YL87	Z4YL87	TSR2	Tsr2
A0A1Y7VL44	A0A1Y7VL44	TTC7B	Ttc7b
Q9D3A9	TTYH1	TTYH1	Ttyh1
Q6P5F7	TTYH3	TTYH3	Ttyh3
Q91YR1	TWF1	TWF1	Twf1
A0A494B955	A0A494B955	TXNL1	Txnl1
Q8JZU2	TXTP	TXTP	Slc25a1
A0A0G2JE32	A0A0G2JE32	UB2D3	Ube2d3
A0A338P7E5	A0A338P7E5	UB2L3	Ube2l3
B7ZBY7	B7ZBY7	UB2V1	Ube2v1
Q02053	UBA1	UBA1	Uba1
Q3TL72	Q3TL72	UBA3	Uba3
P61089	UBE2N	UBE2N	Ube2n
Q6ZPJ3	UBE2O	UBE2O	Ube2o
Q3U4W8	Q3U4W8	UBP5	Usp5
Q6A4J8	UBP7	UBP7	Usp7
Q9QZM0	UBQL2	UBQL2	Ubqln2
A2AN08	UBR4	UBR4	Ubr4
Q99PL6	UBXN6	UBXN6	Ubxn6
Q9R0P9	UCHL1	UCHL1	Uchl1
P56501	UCP3	UCP3	Ucp3
Q9CR68	UCRI	UCRI	Uqcrfs1
Q91ZJ5	UGPA	UGPA	Ugp2
H3BJZ7	H3BJZ7	UN13A	Unc13a
D3Z4C9	D3Z4C9	UQCC2	Uqcc2
Q4FE56	Q4FE56	USP9X	Usp9x
P51863	VA0D1	VA0D1	Atp6v0d1
Q80WQ2	VAC14	VAC14	Vac14
A0A0N4SUV3	A0A0N4SUV3	VAMP1	Vamp1
B0QZN5	B0QZN5	VAMP2	Vamp2
Q9WV55	VAPA	VAPA	Vapa
Q8BH80	Q8BH80	VAPB	Vapb
Q9R1Q9	VAS1	VAS1	Atp6ap1
Q62465	VAT1	VAT1	Vat1
Q80TB8	VAT1L	VAT1L	Vat1l
P50516	VATA	VATA	Atp6v1a
P62814	VATB2	VATB2	Atp6v1b2
Q9Z1G3	VATC1	VATC1	Atp6v1c1
P57746	VATD	VATD	Atp6v1d
P50518	VATE1	VATE1	Atp6v1e1
Q9D1K2	VATF	VATF	Atp6v1f
Q9CR51	VATG1	VATG1	Atp6v1g1
Q9WTT4	VATG2	VATG2	Atp6v1g2
A0A0A6YX18	A0A0A6YX18	VATH	Atp6v1h
E9Q9C5	E9Q9C5	VATL	Atp6v0c
Q3UPN1	Q3UPN1	VCAM1	Vcam1
A0A0R4J0M9	A0A0R4J0M9	VCIP1	Vcpip1
Q60932	VDAC1	VDAC1	Vdac1
G3UX26	G3UX26	VDAC2	Vdac2
J3QMG3	J3QMG3	VDAC3	Vdac3
Q0VGU4	VGF	VGF	Vgf
A0A1B0GRU0	A0A1B0GRU0	VGLU1	Slc17a7
A0A0R4J0A6	A0A0R4J0A6	VGLU2	Slc17a6
O35633	VIAAT	VIAAT	Slc32a1
P20152	VIME	VIME	Vim
Q64727	VINC	VINC	Vcl
P62761	VISL1	VISL1	Vsnl1
Q8BX70	VP13C	VP13C	Vps13c
P40336	VP26A	VP26A	Vps26a
Q8C0E2	VP26B	VP26B	Vps26b
Q9D2N9	VP33A	VP33A	Vps33a
K3W4T3	K3W4T3	VPP1	Atp6v0a1
D3Z645	D3Z645	VPS29	Vps29
Q9EQH3	VPS35	VPS35	Vps35
P97390	VPS45	VPS45	Vps45
Q9CR26	VTA1	VTA1	Vta1
Q8CC88	VWA8	VWA8	Vwa8
Q8R5H6	WASF1	WASF1	Wasf1
Q8VHI6	WASF3	WASF3	Wasf3
A0A1D5RLV7	A0A1D5RLV7	WDFY3	Wdfy3
O88342	WDR1	WDR1	Wdr1
Q8CBE3	WDR37	WDR37	Wdr37
Q8CGF6	WDR47	WDR47	Wdr47
Q8BH57	WDR48	WDR48	Wdr48
Q920I9	WDR7	WDR7	Wdr7
Q3UN10	Q3UN10	WFS1	Wfs1
E0CYT1	E0CYT1	WNK2	Wnk2
E9Q1T9	E9Q1T9	XPO2	Cse1l
B7ZMP1	XPP3	XPP3	Xpnpep3
Q9EPK2	XRP2	XRP2	Rp2
Q9CQW1	YKT6	YKT6	Ykt6
Q810J8	ZFYV1	ZFYV1	Zfyve1
P97441	ZNT3	ZNT3	Slc30a3
Q5IRJ6	ZNT9	ZNT9	Slc30a9
A0A3B2WBH9	A0A3B2WBH9	ZO2	Tjp2

## Sheet: WT - 24M
WT 24 Month Lipofuscin Proteome (n = 1883)
UniProt Accession	SWISSPROT Accession	UniProt ID	Gene Name
Q9CQV8	1433B	1433B	Ywhab
P62259	1433E	1433E	Ywhae
P68510	1433F	1433F	Ywhah
P61982	1433G	1433G	Ywhag
P68254	1433T	1433T	Ywhaq
P63101	1433Z	1433Z	Ywhaz
Q76MZ3	2AAA	2AAA	Ppp2r1a
Q99L13	3HIDH	3HIDH	Hibadh
P10852	4F2	4F2	Slc3a2
A0A0A6YW67	A0A0A6YW67	A0A0A6YW67	Gm8797
A0A1Y7VKY1	A0A1Y7VKY1	A0A1Y7VKY1	Rps18-ps5
Q3UHJ0	AAK1	AAK1	Aak1
P05201	AATC	AATC	Got1
P05202	AATM	AATM	Got2
Q61102	ABCB7	ABCB7	Abcb7
Q99LR1	ABD12	ABD12	Abhd12
Q6PE15	ABHDA	ABHDA	Abhd10
A0A087WRS3	A0A087WRS3	ABI2	Abi2
E9Q030	E9Q030	ABLM1	Ablim1
Q8BL65	ABLM2	ABLM2	Ablim2
A0A0R4J0P1	A0A0R4J0P1	ACAD8	Acad8
Q8JZN5	ACAD9	ACAD9	Acad9
A0A0R4J083	A0A0R4J083	ACADL	Acadl
P45952	ACADM	ACADM	Acadm
P50544	ACADV	ACADV	Acadvl
Q99PU5	ACBG1	ACBG1	Acsbg1
Q9DBL1	ACDSB	ACDSB	Acadsb
Q3V117	Q3V117	ACLY	Acly
Q9CQR4	ACO13	ACO13	Acot13
Q99KI0	ACON	ACON	Aco2
Q9R0X4	ACOT9	ACOT9	Acot9
F6ZFT1	F6ZFT1	ACPM	Ndufab1
Q8VCW8	ACSF2	ACSF2	Acsf2
D3Z041	D3Z041	ACSL1	Acsl1
Q91WC3	ACSL6	ACSL6	Acsl6
P63260	ACTG	ACTG	Actg1
A1BN54	A1BN54	ACTN1	Actn1
E9Q2W9	E9Q2W9	ACTN4	Actn4
D3YUP9	D3YUP9	ADA22	Adam22
Q9R1V7	ADA23	ADA23	Adam23
Q9D0L4	ADCK1	ADCK1	Adck1
Q9QYB8	ADDB	ADDB	Add2
Q9QYB5	ADDG	ADDG	Add3
P48962	ADT1	ADT1	Slc25a4
P51881	ADT2	ADT2	Slc25a5
Q8JZQ2	AFG32	AFG32	Afg3l2
Q3UHD9	AGAP2	AGAP2	Agap2
Q9ESW4	AGK	AGK	Agk
H7BX15	H7BX15	AGRL1	Adgrl1
B1AU25	B1AU25	AIFM1	Aifm1
P46660	AINX	AINX	Ina
A2AJA9	AJM1	AJM1	Ajm1
Q9JII6	AK1A1	AK1A1	Akr1a1
D3YVF0	AKAP5	AKAP5	Akap5
P24549	AL1A1	AL1A1	Aldh1a1
Q9CZS1	AL1B1	AL1B1	Aldh1b1
Q8R0Y6	AL1L1	AL1L1	Aldh1l1
B1ATI0	B1ATI0	AL3A2	Aldh3a2
Q8CHT0	AL4A1	AL4A1	Aldh4a1
Q9DBF1	AL7A1	AL7A1	Aldh7a1
Q9JLJ2	AL9A1	AL9A1	Aldh9a1
P47738	ALDH2	ALDH2	Aldh2
P05064	ALDOA	ALDOA	Aldoa
P05063	ALDOC	ALDOC	Aldoc
P45376	ALDR	ALDR	Akr1b1
A0A0G2JEG8	A0A0G2JEG8	AMPH	Amph
Q9CPY7	AMPL	AMPL	Lap3
A0A0R4J1N7	A0A0R4J1N7	ANK1	Ank1
S4R2T7	S4R2T7	ANK2	Ank2
S4R2K9	S4R2K9	ANK3	Ank3
A0A0R4J2A6	A0A0R4J2A6	ANS1B	Anks1b
P48036	ANXA5	ANXA5	Anxa5
P14824	ANXA6	ANXA6	Anxa6
Q64133	AOFA	AOFA	Maoa
Q8BW75	AOFB	AOFB	Maob
Q61548	AP180	AP180	Snap91
O35643	AP1B1	AP1B1	Ap1b1
D3YZ71	D3YZ71	AP1M1	Ap1m1
P17426	AP2A1	AP2A1	Ap2a1
P17427	AP2A2	AP2A2	Ap2a2
Q9DBG3	AP2B1	AP2B1	Ap2b1
Q3TWV4	Q3TWV4	AP2M1	Ap2m1
A0A571BES1	A0A571BES1	AP3B2	Ap3b2
O54774	AP3D1	AP3D1	Ap3d1
A0A0R4J0Z3	A0A0R4J0Z3	AQP4	Aqp4
Q9R0Q6	ARC1A	ARC1A	Arpc1a
P61205	ARF3	ARF3	Arf3
P62331	ARF6	ARF6	Arf6
Q3TGS9	Q3TGS9	ARFG1	Arfgap1
Q9D0L7	ARM10	ARM10	Armc10
P61161	ARP2	ARP2	Actr2
Q99JY9	ARP3	ARP3	Actr3
Q641P0	ARP3B	ARP3B	Actr3b
Q9D898	ARP5L	ARP5L	Arpc5l
Q9CVB6	ARPC2	ARPC2	Arpc2
H7BWZ3	H7BWZ3	ARPC3	Arpc3
P59999	ARPC4	ARPC4	Arpc4
Q9CPW4	ARPC5	ARPC5	Arpc5
Q9WV54	ASAH1	ASAH1	Asah1
Q8C0M9	ASGL1	ASGL1	Asrgl1
Q8VDN2	AT1A1	AT1A1	Atp1a1
Q6PIE5	AT1A2	AT1A2	Atp1a2
A0A0G2JGX4	A0A0G2JGX4	AT1A3	Atp1a3
P14094	AT1B1	AT1B1	Atp1b1
P14231	AT1B2	AT1B2	Atp1b2
P97370	AT1B3	AT1B3	Atp1b3
O55143	AT2A2	AT2A2	Atp2a2
G5E829	AT2B1	AT2B1	Atp2b1
S4R1C4	S4R1C4	AT2B2	Atp2b2
Q9CQQ7	AT5F1	AT5F1	Atp5pb
A0A0M3HEP7	A0A0M3HEP7	AT8A1	Atp8a1
Q925I1	ATAD3	ATAD3	Atad3
E9PV44	E9PV44	ATIF1	Atpif1
Q8BH66	ATLA1	ATLA1	Atl1
P56382	ATP5E	ATP5E	Atp5f1e
Q9DCX2	ATP5H	ATP5H	Atp5pd
Q06185	ATP5I	ATP5I	Atp5me
P97450	ATP5J	ATP5J	Atp5pf
Q9CPQ8	ATP5L	ATP5L	Atp5mg
A0A1Y7VLP0	A0A1Y7VLP0	ATP68	Atp5mpl
P03930	ATP8	ATP8	Mtatp8
Q03265	ATPA	ATPA	Atp5f1a
P56480	ATPB	ATPB	Atp5f1b
Q9D3D9	ATPD	ATPD	Atp5f1d
A2AKU9	A2AKU9	ATPG	Atp5c1
P56135	ATPK	ATPK	Atp5mf
Q78IK2	ATPMK	ATPMK	Atp5mk
Q9DB20	ATPO	ATPO	Atp5po
A0A0R4J023	A0A0R4J023	AUHM	Auh
Q80TZ3	AUXI	AUXI	Dnajc6
B2RXT3	B2RXT3	B2RXT3	Ogdhl
E9PYH2	E9PYH2	BACH	Acot7
B1AZ46	B1AZ46	BAIP2	Baiap2
P18572	BASI	BASI	Bsg
Q91XV3	BASP1	BASP1	Basp1
F7BNZ5	F7BNZ5	BCAS1	Bcas1
Q8CBC8	Q8CBC8	BCAT1	Bcat1
Q9CZP5	BCS1	BCS1	Bcs1l
Q80XN0	BDH	BDH	Bdh1
O08539	BIN1	BIN1	Bin1
P20029	BIP	BIP	Hspa5
Q9JM96	BORG4	BORG4	Cdc42ep4
Q8R164	BPHL	BPHL	Bphl
A0A1B0GRV0	A0A1B0GRV0	BPNT1	Bpnt1
Q91VR8	BRK1	BRK1	Brk1
O88737	BSN	BSN	Bsn
Q9DB72	BTBDH	BTBDH	Btbd17
Q8R5L1	Q8R5L1	C1QBP	C1qbp
Q3V3R1	C1TM	C1TM	Mthfd1l
Q80X80	C2C2L	C2C2L	C2cd2l
Q9CZB0	C560	C560	Sdhc
E9Q1X8	E9Q1X8	CA2D1	Cacna2d1
E9Q683	E9Q683	CA2D2	Cacna2d2
Q9Z1L5	CA2D3	CA2D3	Cacna2d3
A0A087WS83	A0A087WS83	CAC1E	Cacna1e
H7BX88	H7BX88	CACP	Crat
Q9WTR5	CAD13	CAD13	Cdh13
D3YYT0	D3YYT0	CADH2	Cdh2
Q8R5M8	CADM1	CADM1	Cadm1
G3UZM4	G3UZM4	CADM2	Cadm2
K4DI58	K4DI58	CADM3	Cadm3
Q8R464	CADM4	CADM4	Cadm4
P00920	CAH2	CAH2	Ca2
P12658	CALB1	CALB1	Calb1
Q08331	CALB2	CALB2	Calb2
P0DP26	CALM1	CALM1	Calm1
P14211	CALR	CALR	Calr
P35564	CALX	CALX	Canx
Q3UHL1	CAMKV	CAMKV	Camkv
O08529	CAN2	CAN2	Capn2
Q63810	CANB1	CANB1	Ppp3r1
Q6ZQ38	CAND1	CAND1	Cand1
P40124	CAP1	CAP1	Cap1
Q9CYT6	CAP2	CAP2	Cap2
Q80TJ1	CAPS1	CAPS1	Cadps
P47757	CAPZB	CAPZB	Capzb
P47754	CAZA2	CAZA2	Capza2
Q00493	CBPE	CBPE	Cpe
P48758	CBR1	CBR1	Cbr1
Q91VT4	CBR4	CBR4	Cbr4
D3YVV1	D3YVV1	CC50A	Tmem30a
S4R2F1	S4R2F1	CCG8	Cacng8
E9Q4G8	E9Q4G8	CD166	Alcam
A0A2R8VK70	A0A2R8VK70	CD47	Cd47
P60766	CDC42	CDC42	Cdc42
A2AMQ5	A2AMQ5	CDS2	Cds2
Q9JKC6	CEND	CEND	Cend1
Q64433	CH10	CH10	Hspe1
P63038	CH60	CH60	Hspd1
Q9D8B3	CHM4B	CHM4B	Chmp4b
Q91WS0	CISD1	CISD1	Cisd1
Q9CZU6	CISY	CISY	Cs
A0A0R4J0K2	A0A0R4J0K2	CKAP5	Ckap5
F7DCH5	F7DCH5	CLAP2	Clasp2
B1AWD8	B1AWD8	CLCA	Clta
Q6IRU5	CLCB	CLCB	Cltb
Q60771	CLD11	CLD11	Cldn11
Q5SXR6	Q5SXR6	CLH1	Cltc
Q9QYB1	CLIC4	CLIC4	Clic4
Q8R4N0	CLYBL	CLYBL	Clybl
Q3U5Q7	CMPK2	CMPK2	Cmpk2
P16330	CN37	CN37	Cnp
O88507	CNTFR	CNTFR	Cntfr
P12960	CNTN1	CNTN1	Cntn1
Q61330	CNTN2	CNTN2	Cntn2
O54991	CNTP1	CNTP1	Cntnap1
E9QNF7	E9QNF7	CNTP2	Cntnap2
P18760	COF1	COF1	Cfl1
Q8BMS4	COQ3	COQ3	Coq3
A0A140LIF0	A0A140LIF0	COQ7	Coq7
F6SFF5	F6SFF5	COQ9	Coq9
O89053	COR1A	COR1A	Coro1a
Q9WUM4	COR1C	COR1C	Coro1c
P00405	COX2	COX2	Mtco2
P00416	COX3	COX3	mt-Co3
P19783	COX41	COX41	Cox4i1
P12787	COX5A	COX5A	Cox5a
Q9CPQ1	COX6C	COX6C	Cox6c
P84086	CPLX2	CPLX2	Cplx2
Q3UYN2	Q3UYN2	CPNE6	Cpne6
P52825	CPT2	CPT2	Cpt2
A0A1L1SRG5	A0A1L1SRG5	CRYAB	Cryab
Q60737	CSK21	CSK21	Csnk2a1
Q6P9K8	CSKI1	CSKI1	Caskin1
O70589	CSKP	CSKP	Cask
G3XA35	G3XA35	CSPG2	Vcan
Q71M36	CSPG5	CSPG5	Cspg5
P97315	CSRP1	CSRP1	Csrp1
A0A0J9YU62	A0A0J9YU62	CTBP1	Ctbp1
Q61301	CTNA2	CTNA2	Ctnna2
Q02248	CTNB1	CTNB1	Ctnnb1
B7ZNF6	B7ZNF6	CTND2	Ctnnd2
P56391	CX6B1	CX6B1	Cox6b1
P48771	CX7A2	CX7A2	Cox7a2
P23242	CXA1	CXA1	Gja1
Q9D0M3	CY1	CY1	Cyc1
P62897	CYC	CYC	Cycs
Q5SQX6	CYFP2	CYFP2	Cyfip2
Q5M8N4	D39U1	D39U1	Sdr39u1
Q8R1Q8	DC1L1	DC1L1	Dync1li1
P48318	DCE1	DCE1	Gad1
A0A0G2JGQ6	A0A0G2JGQ6	DCLK1	Dclk1
E9Q3M3	E9Q3M3	DCTN1	Dctn1
Q99KJ8	DCTN2	DCTN2	Dctn2
Q9CWS0	DDAH1	DDAH1	Ddah1
Q9CQ62	DECR	DECR	Decr1
Q9R0P5	DEST	DEST	Dstn
O70503	DHB12	DHB12	Hsd17b12
P51660	DHB4	DHB4	Hsd17b4
P50171	DHB8	DHB8	Hsd17b8
P26443	DHE3	DHE3	Glud1
A0A0G2JGJ1	A0A0G2JGJ1	DHPR	Qdpr
Q99L04	DHRS1	DHRS1	Dhrs1
A0A2I3BRG8	A0A2I3BRG8	DHRS4	Dhrs4
Q5PR73	DIRA2	DIRA2	Diras2
Q5U458	DJC11	DJC11	Dnajc11
O08749	DLDH	DLDH	Dld
E9Q9H0	E9Q9H0	DLG1	Dlg1
A0A338P6J0	A0A338P6J0	DLG2	Dlg2
A2BEE9	A2BEE9	DLG3	Dlg3
A0A338P6E5	A0A338P6E5	DLG4	Dlg4
Q9D415	DLGP1	DLGP1	Dlgap1
Q0VF59	Q0VF59	DLGP2	Dlgap2
B1AS06	B1AS06	DLGP3	Dlgap3
B1AZP2	DLGP4	DLGP4	Dlgap4
Q8BPN8	DMXL2	DMXL2	Dmxl2
P63037	DNJA1	DNJA1	Dnaja1
Q9QYJ0	DNJA2	DNJA2	Dnaja2
P60904	DNJC5	DNJC5	Dnajc5
Q8K1M6	DNM1L	DNM1L	Dnm1l
Q6NXK7	DPP10	DPP10	Dpp10
E9PWX1	E9PWX1	DPP6	Dpp6
P97427	DPYL1	DPYL1	Crmp1
O08553	DPYL2	DPYL2	Dpysl2
D3Z360	D3Z360	DPYL4	Dpysl4
Q9EQF6	DPYL5	DPYL5	Dpysl5
Q9QXS6	DREB	DREB	Dbn1
Z4YKT6	Z4YKT6	DRS7B	Dhrs7b
Q9JHU4	DYHC1	DYHC1	Dync1h1
P63168	DYL1	DYL1	Dynll1
P39053	DYN1	DYN1	Dnm1
E9QLL2	E9QLL2	DYN3	Dnm3
A2AUK5	A2AUK5	E41L1	Epb41l1
Q80UE4	Q80UE4	E41L2	Epb41l2
E9PX29	E9PX29	E9PX29	Sptbn4
P56564	EAA1	EAA1	Slc1a3
P43006	EAA2	EAA2	Slc1a2
Q8BMS1	ECHA	ECHA	Hadha
Q99JY0	ECHB	ECHB	Hadhb
Q8BH95	ECHM	ECHM	Echs1
P42125	ECI1	ECI1	Eci1
P10126	EF1A1	EF1A1	Eef1a1
P62631	EF1A2	EF1A2	Eef1a2
Q9D8N0	EF1G	EF1G	Eef1g
P58252	EF2	EF2	Eef2
Q8K0D5	EFGM	EFGM	Gfm1
A0A1W2P7T9	A0A1W2P7T9	EFR3B	Efr3b
Q8BFR5	EFTU	EFTU	Tufm
Q9WVK4	EHD1	EHD1	Ehd1
Q8C522	ENDD1	ENDD1	Endod1
P17182	ENOA	ENOA	Eno1
P17183	ENOG	ENOG	Eno2
P08113	ENPL	ENPL	Hsp90b1
O55026	ENTP2	ENTP2	Entpd2
A0A1D5RLS1	A0A1D5RLS1	EP15R	Eps15l1
Q3UHT7	Q3UHT7	ERC2	Erc2
Q5EBJ4	ERMIN	ERMIN	Ermn
P57759	ERP29	ERP29	Erp29
Q99LC5	ETFA	ETFA	Etfa
Q9DCW4	ETFB	ETFB	Etfb
Q6PF96	Q6PF96	ETFD	Etfdh
Q9DCM0	ETHE1	ETHE1	Ethe1
Q8C163	EXOG	EXOG	Exog
Q9D6U8	F162A	F162A	Fam162a
Q05816	FABP5	FABP5	Fabp5
P11404	FABPH	FABPH	Fabp3
A0A0R4J094	A0A0R4J094	FAHD2	Fahd2a
F8VPU2	FARP1	FARP1	Farp1
P19096	FAS	FAS	Fasn
Q80UW2	FBX2	FBX2	Fbxo2
Q6NS60	FBX41	FBX41	Fbxo41
Q9CQ92	FIS1	FIS1	Fis1
P26883	FKB1A	FKB1A	Fkbp1a
O08917	FLOT1	FLOT1	Flot1
Q5SS83	Q5SS83	FLOT2	Flot2
Q61553	FSCN1	FSCN1	Fscn1
P97807	FUMH	FUMH	Fh
Q9D6K8	FUND2	FUND2	Fundc2
S4R1W8	S4R1W8	G3P	Gapdh
P06745	G6PI	G6PI	Gpi
Q9WV18	GABR1	GABR1	Gabbr1
Q80T41	GABR2	GABR2	Gabbr2
P61922	GABT	GABT	Abat
Q9D172	GAL3A	GAL3A	Gatd3
Q9CZD3	GARS	GARS	Gars1
P62874	GBB1	GBB1	Gnb1
P62880	GBB2	GBB2	Gnb2
P29387	GBB4	GBB4	Gnb4
A0A0N4SVT3	A0A0N4SVT3	GBG12	Gng12
P63213	GBG2	GBG2	Gng2
P62812	GBRA1	GBRA1	Gabra1
P63137	GBRB2	GBRB2	Gabrb2
F6ZYH6	F6ZYH6	GBRB3	Gabrb3
A0A0A0MQ68	A0A0A0MQ68	GCDH	Gcdh
Q3USC7	Q3USC7	GD1L1	Gdap1l1
O88741	GDAP1	GDAP1	Gdap1
P50396	GDIA	GDIA	Gdi1
Q61598	GDIB	GDIB	Gdi2
Q99PT1	GDIR1	GDIR1	Arhgdia
E9Q912	GDS1	GDS1	Rap1gds1
A0JNY3	A0JNY3	GEPH	Gphn
P03995	GFAP	GFAP	Gfap
Q9D6M3	GHC1	GHC1	Slc25a22
Q9DB41	GHC2	GHC2	Slc25a18
Q5F258	Q5F258	GIT1	Git1
P15105	GLNA	GLNA	Glul
Q9CPV4	GLOD4	GLOD4	Glod4
Q64516	GLPK	GLPK	Gk
Q80Y14	GLRX5	GLRX5	Glrx5
D3Z7P3	GLSK	GLSK	Gls
O08795	GLU2B	GLU2B	Prkcsh
Q9CZN7	GLYM	GLYM	Shmt2
P21278	GNA11	GNA11	Gna11
P27601	GNA13	GNA13	Gna13
B2RSH2	GNAI1	GNAI1	Gnai1
P08752	GNAI2	GNAI2	Gnai2
Q66L47	Q66L47	GNAL	Gnal
P18872	GNAO	GNAO	Gnao1
P21279	GNAQ	GNAQ	Gnaq
P63094	GNAS2	GNAS2	Gnas
O70443	GNAZ	GNAZ	Gnaz
P62881	GNB5	GNB5	Gnb5
Q8C419	GP158	GP158	Gpr158
Q3ULJ0	GPD1L	GPD1L	Gpd1l
P13707	GPDA	GPDA	Gpd1
Q64521	GPDM	GPDM	Gpd2
P35802	GPM6A	GPM6A	Gpm6a
A2AEG6	A2AEG6	GPM6B	Gpm6b
O70325	GPX4	GPX4	Gpx4
Q61625	GRID2	GRID2	Grid2
Q3UNH4	GRIN1	GRIN1	Gprin1
P97772	GRM1	GRM1	Grm1
Q14BI2	GRM2	GRM2	Grm2
Q9QYS2	GRM3	GRM3	Grm3
Q3UVX5	GRM5	GRM5	Grm5
P38647	GRP75	GRP75	Hspa9
P10649	GSTM1	GSTM1	Gstm1
P19157	GSTP1	GSTP1	Gstp1
P17809	GTR1	GTR1	Slc2a1
P32037	GTR3	GTR3	Slc2a3
Q9R111	GUAD	GUAD	Gda
P43274	H14	H14	H1-4
A0A0N4SV66	A0A0N4SV66	H2AJ	H2aj
Q6ZWY9	H2B1C	H2B1C	H2bc8
P62806	H4	H4	H4c16
Q8K2C9	HACD3	HACD3	Hacd3
Q91VB8	Q91VB8	HBA	Hba-a1
A2AFQ2	A2AFQ2	HCD2	Hsd17b10
Q61425	HCDH	HCDH	Hadh
Q640R3	HECAM	HECAM	Hepacam
A0A494BAI5	A0A494BAI5	HEMH	Fech
Q8QZS1	HIBCH	HIBCH	Hibch
Q9D0S9	HINT2	HINT2	Hint2
F8WH96	F8WH96	HINT3	Hint3
P38060	HMGCL	HMGCL	Hmgcl
D3YX62	D3YX62	HMOX2	Hmox2
B2M1R6	B2M1R6	HNRPK	Hnrnpk
Q9Z2Y3	HOME1	HOME1	Homer1
A0A140LHR9	A0A140LHR9	HOME2	Homer2
Q99JP6	HOME3	HOME3	Homer3
P84075	HPCA	HPCA	Hpca
P62748	HPCL1	HPCL1	Hpcal1
Q9QUP5	HPLN1	HPLN1	Hapln1
Q9ESM3	HPLN2	HPLN2	Hapln2
Q61699	HS105	HS105	Hsph1
Q8K0U4	HS12A	HS12A	Hspa12a
P48722	HS74L	HS74L	Hspa4l
P07901	HS90A	HS90A	Hsp90aa1
P11499	HS90B	HS90B	Hsp90ab1
Q8BTX9	HSDL1	HSDL1	Hsdl1
Q3U2G2	Q3U2G2	HSP74	Hspa4
P63017	HSP7C	HSP7C	Hspa8
G3UVV4	G3UVV4	HXK1	Hk1
Q9JKR6	HYOU1	HYOU1	Hyou1
I3ITR1	I3ITR1	I3ITR1	AK157302
Q60625	ICAM5	ICAM5	Icam5
Q9D6R2	IDH3A	IDH3A	Idh3a
P70404	IDHG1	IDHG1	Idh3g
P54071	IDHP	IDHP	Idh2
A0A0A0MQM0	A0A0A0MQM0	IF5A1	Eif5a
G3UYZ1	G3UYZ1	IGSF8	Igsf8
P70168	IMB1	IMB1	Kpnb1
Q924B0	Q924B0	IMPA1	Impa1
D3YUD3	D3YUD3	INP4A	Inpp4a
Q91VM9	IPYR2	IPYR2	Ppa2
A0A1D5RM83	A0A1D5RM83	IQEC1	Iqsec1
P85094	ISC2A	ISC2A	Isoc2a
A0A1Y7VK19	A0A1Y7VK19	ISCA2	Isca2
P11881	ITPR1	ITPR1	Itpr1
Q9JHI5	IVD	IVD	Ivd
Q9R0Y5	KAD1	KAD1	Ak1
Q9WTP7	KAD3	KAD3	Ak3
Q9WUR9	KAD4	KAD4	Ak4
A0A0A6YX73	A0A0A6YX73	KAP2	Prkar2a
P31324	KAP3	KAP3	Prkar2b
A0A571BGH0	A0A571BGH0	KCAB2	Kcnab2
P11798	KCC2A	KCC2A	Camk2a
P28652	KCC2B	KCC2B	Camk2b
Q923T9	KCC2G	KCC2G	Camk2g
Q9JM63	KCJ10	KCJ10	Kcnj10
A0A286YD35	A0A286YD35	KCMA1	Kcnma1
P63141	KCNA2	KCNA2	Kcna2
Q04447	KCRB	KCRB	Ckb
P30275	KCRU	KCRU	Ckmt1
A0A0R4J093	A0A0R4J093	KCY	Cmpk1
Q9CQX8	KGD4	KGD4	Mrps36
E0CZ72	E0CZ72	KIF2A	Kif2a
Q61768	KINH	KINH	Kif5b
P68404	KPCB	KPCB	Prkcb
P63318	KPCG	KPCG	Prkcg
P52480	KPYM	KPYM	Pkm
A2AFG8	A2AFG8	L1CAM	L1cam
Q9EP89	LACTB	LACTB	Lactb
P11438	LAMP1	LAMP1	Lamp1
F6RJV6	F6RJV6	LANC2	Lancl2
Q61792	LASP1	LASP1	Lasp1
Q9Z127	LAT1	LAT1	Slc7a5
A0A1B0GSX0	A0A1B0GSX0	LDHA	Ldha
A0A6I8MX27	A0A6I8MX27	LDHB	Ldhb
Q9Z2I0	LETM1	LETM1	Letm1
A0A0G2JGB7	A0A0G2JGB7	LGI1	Lgi1
Q8K406	LGI3	LGI3	Lgi3
A9DA50	A9DA50	LIGO1	Lingo1
Q8JZS0	LIN7A	LIN7A	Lin7a
P60469	LIPA3	LIPA3	Ppfia3
P63005	LIS1	LIS1	Pafah1b1
Q8CGK3	LONM	LONM	Lonp1
Q6PB66	LPPRC	LPPRC	Lrpprc
A0A0R4J0I9	A0A0R4J0I9	LRP1	Lrp1
A0A571BEA5	A0A571BEA5	LRRC7	Lrrc7
A0A087WP70	A0A087WP70	LSAMP	Lsamp
Q924L1	LTMD1	LTMD1	Letmd1
Q8K356	Q8K356	LY6H	Ly6h
Q9CR62	M2OM	M2OM	Slc25a11
A0A1Y7VJZ2	A0A1Y7VJZ2	MAAI	Gstz1
Q922B1	MACD1	MACD1	Macrod1
B1ARU4	B1ARU4	MACF1	Macf1
P20917	MAG	MAG	Mag
Q8BI08	MAL2	MAL2	Mal2
Q99KE1	MAOM	MAOM	Me2
Q8BMF3	MAON	MAON	Me3
A2ARP8	A2ARP8	MAP1A	Map1a
P14873	MAP1B	MAP1B	Map1b
P27546	MAP4	MAP4	Map4
Q7TSJ2	MAP6	MAP6	Map6
Q922Q1	MARC2	MARC2	Mtarc2
P26645	MARCS	MARCS	Marcks
Q6PER3	MARE3	MARE3	Mapre3
A0A0R4J1H0	A0A0R4J1H0	MARH5	Marchf5
A0A498WGS3	A0A498WGS3	MBP	Mbp
Q9Z2Z6	MCAT	MCAT	Slc25a20
Q99MR8	MCCA	MCCA	Mccc1
Q3ULD5	MCCB	MCCB	Mccc2
Q3UMR5	MCU	MCU	Mcu
P14152	MDHC	MDHC	Mdh1
P08249	MDHM	MDHM	Mdh2
Q6PCP5	MFF	MFF	Mff
Q80U63	MFN2	MFN2	Mfn2
Q9CPU4	MGST3	MGST3	Mgst3
Q7TNS2	MIC10	MIC10	Micos10
Q9CRB9	MIC19	MIC19	Chchd3
E9Q4M4	E9Q4M4	MIC25	Chchd6
Q9DCZ4	MIC26	MIC26	Apoo
Q78IK4	MIC27	MIC27	Apool
Q8CAQ8	MIC60	MIC60	Immt
Q9CTY5	MICU3	MICU3	Micu3
P34884	MIF	MIF	Mif
Q8BG51	MIRO1	MIRO1	Rhot1
Q3URS9	MITOK	MITOK	Ccdc51
Q9CXJ4	MITOS	MITOS	Abcb8
P63085	MK01	MK01	Mapk1
Q3THE2	ML12B	ML12B	Myl12b
Q9EQ20	MMSA	MMSA	Aldh6a1
Q3UY21	Q3UY21	MOG	Mog
P31938	MP2K1	MP2K1	Map2k1
P63030	MPC1	MPC1	Mpc1
Q9D023	MPC2	MPC2	Mpc2
Q9WV34	MPP2	MPP2	Mpp2
A0A668KLC6	A0A668KLC6	MTAP2	Map2
Q791T5	MTCH1	MTCH1	Mtch1
Q791V5	MTCH2	MTCH2	Mtch2
A0A6I8MWZ8	A0A6I8MWZ8	MTX1	Mtx1
O88441	MTX2	MTX2	Mtx2
P16332	MUTA	MUTA	Mmut
B2RRE2	B2RRE2	MY18A	Myo18a
Q5SV64	Q5SV64	MYH10	Myh10
K3W4R2	K3W4R2	MYH14	Myh14
A0A1W2P6F6	A0A1W2P6F6	MYL6	Myl6
F6Z2S4	F6Z2S4	MYO5A	Myo5a
P60202	MYPR	MYPR	Plp1
A0A3Q4EBU5	A0A3Q4EBU5	NAC1	Slc8a1
Q8K596	NAC2	NAC2	Slc8a2
Q8C5H8	NAKD2	NAKD2	Nadk2
Q9DB73	NB5R1	NB5R1	Cyb5r1
Q9DCN2	NB5R3	NB5R3	Cyb5r3
E9QB01	E9QB01	NCAM1	Ncam1
O35136	NCAM2	NCAM2	Ncam2
Q9Z0E0	NCDN	NCDN	Ncdn
A2AS98	A2AS98	NCKP1	Nckap1
P15532	NDKA	NDKA	Nme1
Q62433	NDRG1	NDRG1	Ndrg1
Q9QYG0	NDRG2	NDRG2	Ndrg2
Q9QYF9	NDRG3	NDRG3	Ndrg3
Q9CQ75	NDUA2	NDUA2	Ndufa2
Q9CQ91	NDUA3	NDUA3	Ndufa3
Q62425	NDUA4	NDUA4	Ndufa4
Q9CPP6	NDUA5	NDUA5	Ndufa5
Q9CQZ5	NDUA6	NDUA6	Ndufa6
Q9Z1P6	NDUA7	NDUA7	Ndufa7
Q9DCJ5	NDUA8	NDUA8	Ndufa8
A0A0R3P9C8	A0A0R3P9C8	NDUA9	Ndufa9
Q99LC3	NDUAA	NDUAA	Ndufa10
G5E814	G5E814	NDUAB	Ndufa11
Q7TMF3	NDUAC	NDUAC	Ndufa12
Q9ERS2	NDUAD	NDUAD	Ndufa13
Q9CQC7	NDUB4	NDUB4	Ndufb4
D3Z568	D3Z568	NDUB5	Ndufb5
Q3UIU2	NDUB6	NDUB6	Ndufb6
Q9CR61	NDUB7	NDUB7	Ndufb7
Q9D6J5	NDUB8	NDUB8	Ndufb8
Q9CQJ8	NDUB9	NDUB9	Ndufb9
Q9DCS9	NDUBA	NDUBA	Ndufb10
O09111	NDUBB	NDUBB	Ndufb11
Q9CQ54	NDUC2	NDUC2	Ndufc2
Q91VD9	NDUS1	NDUS1	Ndufs1
Q91WD5	NDUS2	NDUS2	Ndufs2
Q9DCT2	NDUS3	NDUS3	Ndufs3
E9QPX3	E9QPX3	NDUS4	Ndufs4
B1ARW4	B1ARW4	NDUS5	Ndufs5
P52503	NDUS6	NDUS6	Ndufs6
Q9DC70	NDUS7	NDUS7	Ndufs7
Q8K3J1	NDUS8	NDUS8	Ndufs8
D3YUM1	D3YUM1	NDUV1	Ndufv1
Q9D6J6	NDUV2	NDUV2	Ndufv2
Q8BK30	NDUV3	NDUV3	Ndufv3
Q6R891	NEB2	NEB2	Ppp1r9b
Q9CR95	NECP1	NECP1	Necap1
A0A4W9	A0A4W9	NEGR1	Negr1
P60761	NEUG	NEUG	Nrgn
P06837	NEUM	NEUM	Gap43
Q04690	NF1	NF1	Nf1
Q810U3	NFASC	NFASC	Nfasc
P19246	NFH	NFH	Nefh
P08551	NFL	NFL	Nefl
A0A0R4J036	A0A0R4J036	NFM	Nefm
Q9Z1J3	NFS1	NFS1	Nfs1
P70441	NHRF1	NHRF1	Slc9a3r1
O55125	NIPS1	NIPS1	Nipsnap1
Q7TMG8	Q7TMG8	NIPS2	Nipsnap2
Q69ZK9	NLGN2	NLGN2	Nlgn2
A2AGI2	A2AGI2	NLGN3	Nlgn3
G3X9V4	G3X9V4	NMDE2	Grin2b
A2AI14	A2AI14	NMDZ1	Grin1
J3QMM7	J3QMM7	NNRD	Naxd
A3KGE4	A3KGE4	NOE1	Olfm1
Q9CQE1	NPS3B	NPS3B	Nipsnap3b
P97300	NPTN	NPTN	Nptn
Q62443	NPTX1	NPTX1	Nptx1
E9PZM8	E9PZM8	NPTXR	Nptxr
A0A1W2P7Y9	A0A1W2P7Y9	NRCAM	Nrcam
E0CY11	E0CY11	NRX1A	Nrxn1
P46460	NSF	NSF	Nsf
Q3UHB1	NT5D3	NT5D3	Nt5dc3
D3Z396	D3Z396	NTRI	Ntm
P03888	NU1M	NU1M	Mtnd1
P03921	NU5M	NU5M	Mtnd5
Q9CRD0	OCAD1	OCAD1	Ociad1
Q9D8W7	OCAD2	OCAD2	Ociad2
P53395	ODB2	ODB2	Dbt
Q60597	ODO1	ODO1	Ogdh
Q9D2G2	ODO2	ODO2	Dlst
Q8BMF4	ODP2	ODP2	Dlat
P35486	ODPA	ODPA	Pdha1
Q9D051	ODPB	ODPB	Pdhb
Q8BKZ9	ODPX	ODPX	Pdhx
G3XA53	G3XA53	OMGP	Omg
P58281	OPA1	OPA1	Opa1
O54734	OST48	OST48	Ddost
D3YWF6	D3YWF6	OTUB1	Otub1
E9QMY1	E9QMY1	OX2G	Cd200
Q922Q4	P5CR2	P5CR2	Pycr2
Q9Z110	P5CS	P5CS	Aldh18a1
A0A1L1SVK0	A0A1L1SVK0	PA1B2	Pafah1b2
Q61644	PACN1	PACN1	Pacsin1
Q8K212	PACS1	PACS1	Pacs1
O88643	PAK1	PAK1	Pak1
Q9Z0P4	PALM	PALM	Palm
Q8BR92	PALM2	PALM2	Palm2
Q9JLB0	PALS2	PALS2	Pals2
Q99LX0	PARK7	PARK7	Park7
Q91ZA3	PCCA	PCCA	Pcca
Q99MN9	PCCB	PCCB	Pccb
Q9QYX7	PCLO	PCLO	Pclo
Q9QXV0	PCS1N	PCS1N	Pcsk1n
Q9WU78	PDC6I	PDC6I	Pdcd6ip
A0A384DV92	A0A384DV92	PDE10	Pde10a
A0A1B0GRJ9	A0A1B0GRJ9	PDE2A	Pde2a
P09103	PDIA1	PDIA1	P4hb
P27773	PDIA3	PDIA3	Pdia3
Q3TML0	Q3TML0	PDIA6	Pdia6
Q8BFP9	PDK1	PDK1	Pdk1
Q9JK42	PDK2	PDK2	Pdk2
Q922H2	PDK3	PDK3	Pdk3
A2AJP9	A2AJP9	PDP1	Pdp1
Q8K183	PDXK	PDXK	Pdxk
Q62048	PEA15	PEA15	Pea15
P70296	PEBP1	PEBP1	Pebp1
P12382	PFKAL	PFKAL	Pfkl
P47857	PFKAM	PFKAM	Pfkm
Q8C605	Q8C605	PFKAP	Pfkp
Q9DBJ1	PGAM1	PGAM1	Pgam1
Q61361	PGCB	PGCB	Bcan
Q8BWM0	PGES2	PGES2	Ptges2
P09411	PGK1	PGK1	Pgk1
A2CEK3	A2CEK3	PGM1	Pgm1
P67778	PHB1	PHB1	Phb1
O35129	PHB2	PHB2	Phb2
Q80TL4	PHF24	PHF24	Phf24
E9Q3L2	PI4KA	PI4KA	Pi4ka
F8WHW6	F8WHW6	PI51C	Pip5k1c
E0CYV0	E0CYV0	PIMT	Pcmt1
A2AS45	A2AS45	PKP4	Pkp4
Q9Z1B3	PLCB1	PLCB1	Plcb1
Q9QXS1	PLEC	PLEC	Plec
Q99JY8	PLPP3	PLPP3	Plpp3
A0A0G2JGY9	A0A0G2JGY9	PLPR4	Plppr4
P62137	PP1A	PP1A	Ppp1ca
P63328	PP2BA	PP2BA	Ppp3ca
P17742	PPIA	PPIA	Ppia
P24369	PPIB	PPIB	Ppib
Q3UYC0	PPM1H	PPM1H	Ppm1h
P35700	PRDX1	PRDX1	Prdx1
Q61171	PRDX2	PRDX2	Prdx2
P20108	PRDX3	PRDX3	Prdx3
P99029	PRDX5	PRDX5	Prdx5
Q6GT24	Q6GT24	PRDX6	Prdx6
Q8K411	PREP	PREP	Pitrm1
Q9WU79	PROD	PROD	Prodh
P62962	PROF1	PROF1	Pfn1
Q9JJV2	PROF2	PROF2	Pfn2
E9PUL5	PRRT2	PRRT2	Prrt2
P32848	PRVA	PRVA	Pvalb
Q11011	PSA	PSA	Npepps
Q9Z2U1	PSA5	PSA5	Psma5
A0A1D5RLK2	A0A1D5RLK2	PSD3	Psd3
Q14C51	PTCD3	PTCD3	Ptcd3
Q8BGC4	PTGR3	PTGR3	Ptgr3
P80560	PTPR2	PTPR2	Ptprn2
B2RXS8	B2RXS8	PTPRZ	Ptprz1
P42669	PURA	PURA	Pura
Q3U125	Q3U125	PXL2A	Prxl2a
G5E8R3	G5E8R3	PYC	Pcx
Q8CI94	PYGB	PYGB	Pygb
Q9WUB3	PYGM	PYGM	Pygm
Q0VF55	Q0VF55	Q0VF55	Atp2b3
Q9CZ13	QCR1	QCR1	Uqcrc1
Q9CPX8	QCR10	QCR10	Uqcr11
Q9DB77	QCR2	QCR2	Uqcrc2
P99028	QCR6	QCR6	Uqcrh
Q9CQB4	Q9CQB4	QCR7	Uqcrb
Q9CQ69	QCR8	QCR8	Uqcrq
Q8R1I1	QCR9	QCR9	Uqcr10
P61027	RAB10	RAB10	Rab10
Q91V41	RAB14	RAB14	Rab14
A0A3Q4EI12	A0A3Q4EI12	RAB18	Rab18
Q9D1G1	RAB1B	RAB1B	Rab1b
P35282	RAB21	RAB21	Rab21
P53994	RAB2A	RAB2A	Rab2a
Q6PHN9	RAB35	RAB35	Rab35
P63011	RAB3A	RAB3A	Rab3a
P62823	RAB3C	RAB3C	Rab3c
P61021	RAB5B	RAB5B	Rab5b
P35278	RAB5C	RAB5C	Rab5c
P51150	RAB7A	RAB7A	Rab7a
P61028	RAB8B	RAB8B	Rab8b
P63001	RAC1	RAC1	Rac1
A0A5F8MPB9	A0A5F8MPB9	RADI	Rdx
P63321	RALA	RALA	Rala
P61226	RAP2B	RAP2B	Rap2b
Q61411	RASH	RASH	Hras
P46638	RB11B	RB11B	Rab11b
O35963	RB33B	RB33B	Rab33b
Q9ERI6	RDH14	RDH14	Rdh14
G3X8R0	G3X8R0	REEP5	Reep5
Q80XD3	Q80XD3	RGS7	Rgs7
A0A0A6YXF6	A0A0A6YXF6	RHOA	Rhoa
P62746	RHOB	RHOB	Rhob
P52760	RIDA	RIDA	Rida
A0A0G2JFB0	A0A0G2JFB0	RIMB2	Rimbp2
F6TZK4	F6TZK4	RIMS1	Rims1
A0A3B2WBL1	A0A3B2WBL1	RL10A	Rpl10a
Q9CXW4	RL11	RL11	Rpl11
P35979	RL12	RL12	Rpl12
P47963	RL13	RL13	Rpl13
Q9CR57	RL14	RL14	Rpl14
Q6ZWZ7	Q6ZWZ7	RL17	Rpl17
A0A1B0GQU8	A0A1B0GQU8	RL18	Rpl18
A2A547	A2A547	RL19	Rpl19
P67984	RL22	RL22	Rpl22
P61358	RL27	RL27	Rpl27
P14115	RL27A	RL27A	Rpl27a
P27659	RL3	RL3	Rpl3
P47962	RL5	RL5	Rpl5
F6XI62	F6XI62	RL7	Rpl7
P12970	RL7A	RL7A	Rpl7a
P62918	RL8	RL8	Rpl8
D3YVM5	D3YVM5	RLA0	Rplp0
P47955	RLA1	RLA1	Rplp1
P99027	RLA2	RLA2	Rplp2
Q9DB15	RM12	RM12	Mrpl12
A0A1Y7VMN0	A0A1Y7VMN0	ROCK2	Rock2
P47708	RP3A	RP3A	Rph3a
Q9EQZ6	RPGF4	RPGF4	Rapgef4
Q91YQ5	RPN1	RPN1	Rpn1
A2ACG7	A2ACG7	RPN2	Rpn2
F7AEH4	F7AEH4	RS12	Rps12
D3YUG3	D3YUG3	RS19	Rps19
P25444	RS2	RS2	Rps2
P62908	RS3	RS3	Rps3
P97351	RS3A	RS3A	Rps3a
P62702	RS4X	RS4X	Rps4x
D3YYM6	D3YYM6	RS5	Rps5
P62754	RS6	RS6	Rps6
P62242	RS8	RS8	Rps8
Q9CXW2	RT22	RT22	Mrps22
Q8K0T0	RTN1	RTN1	Rtn1
Q9ES97	RTN3	RTN3	Rtn3
Q99P72	RTN4	RTN4	Rtn4
A0A0G2JFT8	A0A0G2JFT8	RUFY3	Rufy3
P50114	S100B	S100B	S100b
A0A0J9YU26	A0A0J9YU26	S12A5	Slc12a5
Q8BH59	S2512	S2512	Slc25a12
A2AKW0	A2AKW0	S2551	Slc25a51
Q91VE0	S27A4	S27A4	Slc27a4
A0A0A6YWF5	A0A0A6YWF5	S38A3	Slc38a3
Q5DTL9	S4A10	S4A10	Slc4a10
E9Q8N8	E9Q8N8	S4A4	Slc4a4
P31650	S6A11	S6A11	Slc6a11
A0A0R4J087	A0A0R4J087	S6A17	Slc6a17
A0A5F8MPK9	A0A5F8MPK9	SAC1	Sacm1l
Q80SW1	SAHH2	SAHH2	Ahcyl1
F8WGT1	F8WGT1	SAHH3	Ahcyl2
Q8BGH2	SAM50	SAM50	Samm50
O35874	SATT	SATT	Slc1a4
P31648	SC6A1	SC6A1	Slc6a1
E9Q3V0	E9Q3V0	SC6A9	Slc6a9
Q8C8N2	SCAI	SCAI	Scai
Q8K021	SCAM1	SCAM1	Scamp1
Q3UXS0	Q3UXS0	SCAM3	Scamp3
Q9JKD3	SCAM5	SCAM5	Scamp5
A2ASZ8	SCMC2	SCMC2	Slc25a25
Q6GQS1	SCMC3	SCMC3	Slc25a23
A0A5H1ZRM8	A0A5H1ZRM8	SCN2A	Scn2a
Q9D0K2	SCOT1	SCOT1	Oxct1
P32020	SCP2	SCP2	Scp2
Q8R127	SCPDL	SCPDL	Sccpdh
Q9CZC8	SCRN1	SCRN1	Scrn1
Q8K2B3	SDHA	SDHA	Sdha
Q9CQA3	SDHB	SDHB	Sdhb
A0A0J9YTY0	A0A0J9YTY0	SEPT11	Septin11
D3YYB1	D3YYB1	SEPT2	Septin2
Q9Z1S5	SEPT3	SEPT3	Septin3
A0A5F8MP96	A0A5F8MP96	SEPT4	Septin4
Q9R1T4	SEPT6	SEPT6	Septin6
E9Q1G8	E9Q1G8	SEPT7	Septin7
B7ZC46	B7ZC46	SEPT8	Septin8
A2A6U3	A2A6U3	SEPT9	Septin9
Q61753	SERA	SERA	Phgdh
Q99K85	SERC	SERC	Psat1
Q99JR1	SFXN1	SFXN1	Sfxn1
Q91V61	SFXN3	SFXN3	Sfxn3
Q925N0	SFXN5	SFXN5	Sfxn5
Q8VD37	SGIP1	SGIP1	Sgip1
A2ALV3	A2ALV3	SH3G2	Sh3gl2
D3YZU1	SHAN1	SHAN1	Shank1
D3Z5K8	D3Z5K8	SHAN2	Shank2
Q4ACU6	SHAN3	SHAN3	Shank3
A2AWI7	A2AWI7	SHLB2	Sh3glb2
P97797	SHPS1	SHPS1	Sirpa
Q8C3Q5	SHSA7	SHSA7	Shisa7
A0A140LHL5	A0A140LHL5	SIR2	Sirt2
Q9WTX5	SKP1	SKP1	Skp1
D3Z781	D3Z781	SKT	Etl4
Q9DB05	SNAA	SNAA	Napa
P28663	SNAB	SNAB	Napb
D3Z4B2	D3Z4B2	SNAG	Napg
O55100	SNG1	SNG1	Syngr1
Q8R191	SNG3	SNG3	Syngr3
P60879	SNP25	SNP25	Snap25
Q80U23	SNPH	SNPH	Snph
P08228	SODC	SODC	Sod1
P09671	SODM	SODM	Sod2
Q6NZL0	SOGA3	SOGA3	Soga3
Q91XH5	Q91XH5	SPRE	Spr
Q62261	SPTB2	SPTB1	Sptbn1
Q68FG2	Q68FG2	SPTB2	Sptbn2
A3KGU7	A3KGU7	SPTN1	Sptan1
F6ZKZ3	F6ZKZ3	SQOR	Sqor
A0A286YCQ0	A0A286YCQ0	SRBS1	Sorbs1
A0A0R4J1T1	A0A0R4J1T1	SRBS2	Sorbs2
A0A571BDG6	A0A571BDG6	SRCN1	Srcin1
E9QN14	E9QN14	SRGP3	Srgap3
Q8BWF0	SSDH	SSDH	Aldh5a1
Q60864	STIP1	STIP1	Stip1
Q99JB2	STML2	STML2	Stoml2
P54227	STMN1	STMN1	Stmn1
Q9ER00	STX12	STX12	Stx12
O35526	STX1A	STX1A	Stx1a
P61264	STX1B	STX1B	Stx1b
O08599	STXB1	STXB1	Stxbp1
D3Z079	D3Z079	STXB5	Stxbp5
Q9WUM5	SUCA	SUCA	Suclg1
Q9Z2I9	SUCB1	SUCB1	Sucla2
Q9Z2I8	SUCB2	SUCB2	Suclg2
Q9JIS5	SV2A	SV2A	Sv2a
Q8BG39	SV2B	SV2B	Sv2b
A0A338P799	A0A338P799	SYGP1	Syngap1
Q8BIJ6	SYIM	SYIM	Iars2
O88935	SYN1	SYN1	Syn1
Q64332	SYN2	SYN2	Syn2
D3Z656	D3Z656	SYNJ1	Synj1
Q8CC35	SYNPO	SYNPO	Synpo
Q62277	SYPH	SYPH	Syp
Q9JJL8	SYSM	SYSM	Sars2
P46096	SYT1	SYT1	Syt1
A0A0R4J2C2	A0A0R4J2C2	SYT2	Syt2
O55042	SYUA	SYUA	Snca
Q91ZZ3	SYUB	SYUB	Sncb
Q9R1Q8	TAGL3	TAGL3	Tagln3
B1AQW2	B1AQW2	TAU	Mapt
P68369	TBA1A	TBA1A	Tuba1a
A0A0A0MQA5	A0A0A0MQA5	TBA4A	Tuba4a
Q9ERD7	TBB3	TBB3	Tubb3
Q9D6F9	TBB4A	TBB4A	Tubb4a
P99024	TBB5	TBB5	Tubb5
P11983	TCPA	TCPA	Tcp1
P80314	TCPB	TCPB	Cct2
G5E839	G5E839	TCPD	Cct4
P80316	TCPE	TCPE	Cct5
P80318	TCPG	TCPG	Cct3
P80313	TCPH	TCPH	Cct7
P42932	TCPQ	TCPQ	Cct8
Q52KG9	Q52KG9	TCPZ	Cct6a
A0A0G2JFB2	A0A0G2JFB2	TDRKH	Tdrkh
Q8BYI9	TENR	TENR	Tnr
Q01853	TERA	TERA	Vcp
Q3UUI3	THEM4	THEM4	Them4
Q921H8	THIKA	THIKA	Acaa1a
Q8QZT1	THIL	THIL	Acat1
Q8BWT1	THIM	THIM	Acaa2
P10639	THIO	THIO	Txn
Q8BH55	THNS1	THNS1	Thnsl1
Q99J99	THTM	THTM	Mpst
P52196	THTR	THTR	Tst
A0A1L1SUX8	A0A1L1SUX8	THY1	Thy1
Z4YN86	Z4YN86	TIM22	Timm22
O35857	TIM44	TIM44	Timm44
Q9D880	TIM50	TIM50	Timm50
Q9WV98	TIM9	TIM9	Timm9
P40142	TKT	TKT	Tkt
Q9CR76	TM186	TM186	Tmem186
D3YXS8	D3YXS8	TM40L	Tomm40l
Q8BK08	TMM11	TMM11	Tmem11
Q4VAE3	TMM65	TMM65	Tmem65
Q9JKK7	TMOD2	TMOD2	Tmod2
D3Z2J6	D3Z2J6	TMX2	Tmx2
Q9CPQ3	TOM22	TOM22	Tomm22
Q9CZW5	TOM70	TOM70	Tomm70
P17751	TPIS	TPIS	Tpi1
G5E8R0	G5E8R0	TPM1	Tpm1
Q7TQD2	TPPP	TPPP	Tppp
Q9CRB6	TPPP3	TPPP3	Tppp3
Q9CQN1	TRAP1	TRAP1	Trap1
Q9D3A9	TTYH1	TTYH1	Ttyh1
Q8JZU2	TXTP	TXTP	Slc25a1
Q02053	UBA1	UBA1	Uba1
P61089	UBE2N	UBE2N	Ube2n
Q3U4W8	Q3U4W8	UBP5	Usp5
Q9R0P9	UCHL1	UCHL1	Uchl1
Q9CR68	UCRI	UCRI	Uqcrfs1
P51863	VA0D1	VA0D1	Atp6v0d1
D3YTU0	D3YTU0	VAMP1	Vamp1
B0QZN5	B0QZN5	VAMP2	Vamp2
Q9WV55	VAPA	VAPA	Vapa
Q8BH80	Q8BH80	VAPB	Vapb
Q62465	VAT1	VAT1	Vat1
P50516	VATA	VATA	Atp6v1a
P62814	VATB2	VATB2	Atp6v1b2
Q9Z1G3	VATC1	VATC1	Atp6v1c1
P57746	VATD	VATD	Atp6v1d
P50518	VATE1	VATE1	Atp6v1e1
Q9WTT4	VATG2	VATG2	Atp6v1g2
A0A0A6YX18	A0A0A6YX18	VATH	Atp6v1h
Q60932	VDAC1	VDAC1	Vdac1
G3UX26	G3UX26	VDAC2	Vdac2
J3QMG3	J3QMG3	VDAC3	Vdac3
A0A1B0GRU0	A0A1B0GRU0	VGLU1	Slc17a7
O35633	VIAAT	VIAAT	Slc32a1
P20152	VIME	VIME	Vim
P62761	VISL1	VISL1	Vsnl1
K3W4T3	K3W4T3	VPP1	Atp6v0a1
Q9EQH3	VPS35	VPS35	Vps35
Q8CC88	VWA8	VWA8	Vwa8
Q8VHI6	WASF3	WASF3	Wasf3
O88342	WDR1	WDR1	Wdr1
Q920I9	WDR7	WDR7	Wdr7
Q9CQW1	YKT6	YKT6	Ykt6
F6X1P1	F6X1P1	2310061I04Rik	2310061I04Rik
Q3UZJ4	Q3UZJ4	2A5E	Ppp2r5e
Q60996	2A5G	2A5G	Ppp2r5c
Q6P1F6	2ABA	2ABA	Ppp2r2a
Q3TA40	Q3TA40	6430548M08Rik	6430548M08Rik
Q9DCD0	6PGD	6PGD	Pgd
Q9CQ60	6PGL	6PGL	Pgls
P12961	7B2	7B2	Scg5
A0A0A6YWM0	A0A0A6YWM0	A0A0A6YWM0	Pcdh9
A0A0J9YUN4	A0A0J9YUN4	A0A0J9YUN4	Dnm1-g
A0A140T8T4	A0A140T8T4	A0A140T8T4	Rpl9-ps6
A0A1B0GS68	A0A1B0GS68	A0A1B0GS68	Gm45713
A0A1L1SQA2	A0A1L1SQA2	A0A1L1SQA2	Pam16l
A0A1W2P7G5	A0A1W2P7G5	A0A1W2P7G5	Coq10a
A0A286YD08	A0A286YD08	A0A286YD08	Sec24c
A0A338P6I9	A0A338P6I9	A0A338P6I9	Gm56451
A0A2I3BPT1	A0A2I3BPT1	A4	App
A8DUK4	A8DUK4	A8DUK4	Hbb-bs
P63115	AAA1	AAA1	Slc7a10
Q99K67	AASS	AASS	Aass
A0A0G2JDI9	A0A0G2JDI9	ABCD3	Abcd3
Q91ZH7	ABHD3	ABHD3	Abhd3
Q8K4F5	ABHDB	ABHDB	Abhd11
Q9Z1Q2	ABHGA	ABHGA	Abhd16a
B7ZCU0	B7ZCU0	ABI1	Abi1
A0A571BG95	A0A571BG95	ABR	Abr
Q07417	ACADS	ACADS	Acads
P31786	ACBP	ACBP	Dbi
P28271	ACOHC	ACOHC	Aco1
Q9QYR9	ACOT2	ACOT2	Acot2
Q99NB1	ACS2L	ACS2L	Acss1
Q3URE1	ACSF3	ACSF3	Acsf3
P68033	ACTC	ACTC	Actc1
Q9JI91	ACTN2	ACTN2	Actn2
Q8R5C5	ACTY	ACTY	Actr1b
P61164	ACTZ	ACTZ	Actr1a
E9QJT5	E9QJT5	ACYP1	Acyp1
P56375	ACYP2	ACYP2	Acyp2
P84309	ADCY5	ADCY5	Adcy5
E9Q706	E9Q706	ADCY9	Adcy9
Q9QYC0	ADDA	ADDA	Add1
P28474	ADHX	ADHX	Adh5
P55264	ADK	ADK	Adk
Q61578	ADRO	ADRO	Fdxr
P46656	ADX	ADX	Fdx1
Q6PDY2	AEDO	AEDO	Ado
E9PYX7	E9PYX7	AFAD	Afdn
Q3V384	AFG1L	AFG1L	Afg1l
A0A1D5RMG4	A0A1D5RMG4	AGAP3	Agap3
A0A087WNV1	A0A087WNV1	AGFG1	Agfg1
Q3UHD1	AGRB1	AGRB1	Adgrb1
A0A668KLD3	A0A668KLD3	AKA12	Akap12
Q7TN79	AKA7G	AKA7A	Akap7
Q8BGT5	ALAT2	ALAT2	Gpt2
P07724	ALBU	ALBU	Alb
Q9DBE8	ALG2	ALG2	Alg2
Q8VCT3	AMPB	AMPB	Rnpep
A2AE27	A2AE27	AMPD2	Ampd2
B0V2N7	B0V2N7	ANXA2	Anxa2
A0A2C9F2D2	A0A2C9F2D2	ANXA7	Anxa7
Q8CBB7	Q8CBB7	AP1G1	Ap1g1
P62743	AP2S1	AP2S1	Ap2s1
Q8R2R9	AP3M2	AP3M2	Ap3m2
Q8BSZ2	AP3S2	AP3S2	Ap3s2
P56380	AP4A	AP4A	Nudt2
Q9D7N9	APMAP	APMAP	Apmap
P08226	APOE	APOE	Apoe
Q7TS64	Q7TS64	ARBK1	Grk2
P84084	ARF5	ARF5	Arf5
A0A1B0GS63	A0A1B0GS63	ARFP2	Arfip2
Q8BW86	ARG33	ARG33	Arhgef33
A0A0R4J0X8	A0A0R4J0X8	ARHG7	Arhgef7
Q8CG76	ARK72	ARK72	Akr7a2
A0A494BAJ6	A0A494BAJ6	ARL3	Arl3
Q9CQW2	ARL8B	ARL8B	Arl8b
Q9D7A8	ARMC1	ARMC1	Armc1
Q9QZB7	ARP10	ARP10	Actr10
J3QNU6	J3QNU6	ARRB1	Arrb1
H3BJY2	H3BJY2	ASAP1	Asap1
Q6NXK8	ASIC1	ASIC1	Asic1
P16460	ASSY	ASSY	Ass1
A0A0A6YWE6	A0A0A6YWE6	ASTN1	Astn1
E9Q828	E9Q828	AT2B4	Atp2b4
A0A494BAB5	A0A494BAB5	ATAD1	Atad1
Q8BHE3	ATCAY	ATCAY	Atcay
Q6PA06	ATLA2	ATLA2	Atl2
O08997	ATOX1	ATOX1	Atox1
Q9CRA7	ATP5S	ATP5S	Dmac2l
P00848	ATP6	ATP6	Mtatp6
H3BLL2	H3BLL2	ATPF1	Atpaf1
A0A0R4J1C5	A0A0R4J1C5	ATPF2	Atpaf2
A0A338P7G3	A0A338P7G3	ATPO-OCSP	Atp5o
P59017	B2L13	B2L13	Bcl2l13
P04919	B3AT	B3AT	Slc4a1
Q8CI32	BAG5	BAG5	Bag5
A0A1B0GX81	A0A1B0GX81	BAG6	Bag6
Q61335	BAP31	BAP31	Bcap31
A0A1B0GX27	A0A1B0GX27	BCAT2	Bcat2
A0A0U1RNL7	A0A0U1RNL7	BCKD	Bckdk
A0A1B0GT26	A0A1B0GT26	BNIP3	Bnip3
D3Z5P0	D3Z5P0	BRSK1	Brsk1
P98086	C1QA	C1QA	C1qa
A0A1W2P733	A0A1W2P733	C1TC	Mthfd1
Q8C3W1	CA198	CA198	CA198
Q06138	CAB39	CAB39	Cab39
A0A1L1SQZ2	A0A1L1SQZ2	CAC1A	Cacna1a
A0A2U3TZ49	A0A2U3TZ49	CACB3	Cacnb3
J3QK20	J3QK20	CACB4	Cacnb4
H3BKV8	H3BKV8	CAD10	Cdh10
Q8CAK1	CAF17	CAF17	Iba57
P28651	CAH8	CAH8	Ca8
G3UXA3	G3UXA3	CALU	Calu
O08688	CAN5	CAN5	Capn5
P24270	CATA	CATA	Cat
P10605	CATB	CATB	Ctsb
F8WIR1	F8WIR1	CATD	Ctsd
P47753	CAZA1	CAZA1	Capza1
Q9R171	CBLN1	CBLN1	Cbln1
E0CYX9	E0CYX9	CC127	Ccdc127
Q3UHB8	CC177	CC177	Ccdc177
Q8C3X2	CC90B	CC90B	Ccdc90b
Q9JJV5	CCG3	CCG3	Cacng3
P53702	CCHL	CCHL	Hccs
P35762	CD81	CD81	Cd81
Q9DB75	CDIP1	CDIP1	Cdip1
A0A0U1RP13	A0A0U1RP13	CDIPT	Cdipt
P49615	CDK5	CDK5	Cdk5
Q9D1L0	CHCH2	CHCH2	Chchd2
B1AR13	CISD3	CISD3	Cisd3
Q9D6G9	CKLF5	CKLF5	Cmtm5
A0A1B0GT29	A0A1B0GT29	CLCN4	Clcn4
Q9Z0S6	CLD10	CLD10	Cldn10
Q9CQX5	CLDN1	CLDN1	Cldnd1
D3Z2Z1	D3Z2Z1	CLIP1	Clip1
Q8CCN6	Q8CCN6	CLPB	Clpb
O88696	CLPP	CLPP	Clpp
Q6P8N8	Q6P8N8	CLPX	Clpx
Q06890	CLUS	CLUS	Clu
Q8BIG7	CMTD1	CMTD1	Comtd1
Q9D1A2	CNDP2	CNDP2	Cndp2
P47746	CNR1	CNR1	Cnr1
Q5M8N0	CNRP1	CNRP1	Cnrip1
Q8BGD8	COA6	COA6	Coa6
Q921H9	COA7	COA7	Coa7
Q9DBL7	COASY	COASY	Coasy
P45591	COF2	COF2	Cfl2
Q9CXI0	COQ5	COQ5	Coq5
Q8R1S0	COQ6	COQ6	Coq6
F7B1B6	F7B1B6	COQ8A	Coq8a
Q9WUM3	COR1B	COR1B	Coro1b
Q8BH44	COR2B	COR2B	Coro2b
Q9CQI6	COTL1	COTL1	Cotl1
P00397	COX1	COX1	Mtco1
Q9D7J4	COX20	COX20	Cox20
E9PZS8	E9PZS8	COX7R	Cox7a2l
Q8K199	COXM2	COXM2	Cmc2
P63040	CPLX1	CPLX1	Cplx1
Q8JZW4	CPNE5	CPNE5	Cpne5
O88456	CPNS1	CPNS1	Capns1
P97742	CPT1A	CPT1A	Cpt1a
Q9DCT8	CRIP2	CRIP2	Crip2
Q5ND50	Q5ND50	CRK	Crk
A0A338P675	A0A338P675	CRKL	Crkl
O54983	CRYM	CRYM	Crym
G3UZA4	G3UZA4	CSK2B	Csnk2b
P61202	CSN2	CSN2	Cops2
O88544	CSN4	CSN4	Cops4
O35864	CSN5	CSN5	Cops5
D3Z0F5	D3Z0F5	CSN6	Cops6
Q9CZ04	CSN7A	CSN7A	Cops7a
Q8VBV7	CSN8	CSN8	Cops8
A2AMH3	A2AMH3	CTL1	Slc44a1
A0A1L1SVG6	A0A1L1SVG6	CTL2	Slc44a2
P26231	CTNA1	CTNA1	Ctnna1
D3Z2H2	D3Z2H2	CTND1	Ctnnd1
F6SBR5	F6SBR5	CTRO	Cit
B9EJA2	CTTB2	CTTB2	Cttnbp2
Q9JLV5	CUL3	CUL3	Cul3
G3X914	G3X914	CUL5	Cul5
Q9DCW5	Q9DCW5	CX6A1	Cox6a1
P00158	CYB	CYB	Mt-Cyb
G5E850	G5E850	CYB5	Cyb5a
Q9CQX2	CYB5B	CYB5B	Cyb5b
Q7TMB8	CYFP1	CYFP1	Cyfip1
A0A1B0GRX7	A0A1B0GRX7	CYH2	Cyth2
A0A2I3BRN5	A0A2I3BRN5	CYRIB	Cyrib
D3YTP3	D3YTP3	D3YTP3	Mtx3
D3YXH0	D3YXH0	D3YXH0	Gm49948
D3Z494	D3Z494	D3Z494	Akr1b10
D3Z7X0	D3Z7X0	D3Z7X0	Acad12
Q62418	DBNL	DBNL	Dbnl
D3Z0M6	D3Z0M6	DC1I1	Dync1i1
A2BFF5	A2BFF5	DC1I2	Dync1i2
A0A1D5RMC1	A0A1D5RMC1	DC1L2	Dync1li2
Q8BHC4	DCAKD	DCAKD	Dcakd
P48320	DCE2	DCE2	Gad2
Q99J39	DCMC	DCMC	Mlycd
E9Q919	E9Q919	DCTN3	Dctn3
Q99LD8	DDAH2	DDAH2	Ddah2
Q3U1J4	DDB1	DDB1	Ddb1
O88533	DDC	DDC	Ddc
Q91VR5	DDX1	DDX1	Ddx1
Q62167	DDX3X	DDX3X	Ddx3x
Q9WV69	DEMA	DEMA	Dmtn
E9Q0G1	E9Q0G1	DENR	Denr
Q6NS52	DGKB	DGKB	Dgkb
Q6P5E8	DGKQ	DGKQ	Dgkq
Q6WQJ1	DGLA	DGLA	Dagla
A0A0U1RPX3	A0A0U1RPX3	DGUOK	Dguok
Q9EQ06	DHB11	DHB11	Hsd17b11
Q9CXV1	DHSD	DHSD	Sdhd
Q9QZD8	DIC	DIC	Slc25a10
Q3UH60	DIP2B	DIP2B	Dip2b
P62627	DLRB1	DLRB1	Dynlrb1
Q99M87	DNJA3	DNJA3	Dnaja3
Q9JMC3	DNJA4	DNJA4	Dnaja4
A0A0G2JER9	A0A0G2JER9	DNJB6	Dnajb6
Q3TVK3	Q3TVK3	DNPEP	Dnpep
F8VPQ1	F8VPQ1	DOCK3	Dock3
Q8K3H0	DP13A	DP13A	Appl1
Q99KK7	DPP3	DPP3	Dpp3
E9PWE8	E9PWE8	DPYL3	Dpysl3
Q9DD18	DTD1	DTD1	Dtd1
B1AQF4	B1AQF4	DUS3	Dusp3
Q91XQ0	DYH8	DYH8	Dnah8
Q9D0M5	DYL2	DYL2	Dynll2
Q91ZU6	DYST	DYST	Dst
E9PVN6	E9PVN6	E9PVN6	Gm20498
E9PY16	E9PY16	E9PY16	Adap1
E9PZF0	E9PZF0	E9PZF0	Gm20390
O35459	ECH1	ECH1	Ech1
Q9D9V3	ECHD1	ECHD1	Echdc1
Q3TCD4	Q3TCD4	ECI2	Eci2
A0A0R4J174	A0A0R4J174	ECSIT	Ecsit
O70251	EF1B	EF1B	Eef1b
A0A0R4J1E2	A0A0R4J1E2	EF1D	Eef1d
Q8C845	Q8C845	EFHD2	Efhd2
Q9CZR8	EFTS	EFTS	Tsfm
Q9QXY6	EHD3	EHD3	Ehd3
Q3UGC7	EI3JA	EI3JA	Eif3j1
Q3V1U8	ELMD1	ELMD1	Elmod1
A2AN84	A2AN84	EM55	Mpp1
Q7TNG5	EMAL2	EMAL2	Eml2
A0A0A6YW06	A0A0A6YW06	ENAH	Enah
Q8BGB7	ENOPH	ENOPH	Enoph1
A0A571BEG4	A0A571BEG4	EPB41	Epb41
Q03137	EPHA4	EPHA4	Epha4
H3BK65	H3BK65	EPS15	Eps15
H3BKH6	H3BKH6	ESTD	Esd
A6H5Z3	EXC6B	EXC6B	Exoc6b
Q5PPR2	Q5PPR2	EXOC1	Exoc1
Q9D4H1	EXOC2	EXOC2	Exoc2
O35382	EXOC4	EXOC4	Exoc4
Q3TPX4	EXOC5	EXOC5	Exoc5
P26040	EZRI	EZRI	Ezr
F8WJK8	F8WJK8	F10A1	St13
Q9CR98	F136A	F136A	Fam136a
Q8BGY7	F210A	F210A	Fam210a
F6QCI0	F6QCI0	F6QCI0	Taf15
F6TVX7	F6TVX7	F6TVX7	Gm20671
F7BAB2	F7BAB2	F7BAB2	Tmem132b
F8VPN4	F8VPN4	F8VPN4	Agl
F8VQK3	F8VQK3	F8VQK3	Gucy1a2
P35505	FAAA	FAAA	Fah
O08914	FAAH1	FAAH1	Faah
Q8R3F5	FABD	FABD	Mcat
Q8R123	FAD1	FAD1	Flad1
Q3TDN2	FAF2	FAF2	Faf2
Q8R0F8	FAHD1	FAHD1	Fahd1
Q3UDE9	Q3UDE9	FAK2	Ptk2b
Q91YM4	FAKD4	FAKD4	Tbrg4
Q9CPW2	FDX2	FDX2	Fdx2
Q8CIB5	FERM2	FERM2	Fermt2
A2AEX6	A2AEX6	FHL1	Fhl1
P45878	FKBP2	FKBP2	Fkbp2
P30416	FKBP4	FKBP4	Fkbp4
O35465	FKBP8	FKBP8	Fkbp8
A0A0G2JDJ5	A0A0G2JDJ5	FPPS	Fdps
B1AXV0	FRS1L	FRS1L	Frrs1l
A2RT62	FXL16	FXL16	Fbxl16
P39688	FYN	FYN	Fyn
Q99JG2	G37L1	G37L1	Gpr37l1
P97379	G3BP2	G3BP2	G3bp2
G3UXL2	G3UXL2	G3UXL2	Prps1l3
Q00612	G6PD1	G6PD1	G6pdx
A0A0R4J0F6	A0A0R4J0F6	GAK	Gak
Q8BHN3	GANAB	GANAB	Ganab
B1ATI9	B1ATI9	GAS7	Gas7
Q9CZN8	GATA	GATA	Qrsl1
Q9D964	GATM	GATM	Gatm
Q9JMF3	GBG13	GBG13	Gng13
P63216	GBG3	GBG3	Gng3
P50153	GBG4	GBG4	Gng4
Q61016	GBG7	GBG7	Gng7
B1AVY2	B1AVY2	GBRA3	Gabra3
P22723	GBRG2	GBRG2	Gabrg2
Q91WK5	GCSH	GCSH	Gcsh
Q91W43	GCSP	GCSP	Gldc
Q80YP4	Q80YP4	GCYB1	Gucy1b1
Q9CRY7	GDPD1	GDPD1	Gdpd1
A0A0J9YUQ8	A0A0J9YUQ8	GELS	Gsn
O54984	GET3	GET3	Get3
Q99JP7	GGT7	GGT7	Ggt7
Q91VC9	GHITM	GHITM	Ghitm
G5E8T9	G5E8T9	GLO2	Hagh
A0A1Y7VM65	A0A1Y7VM65	GLRX1	Glrx
D3Z1H9	D3Z1H9	GLTP	Gltp
A0A2I3BPS1	A0A2I3BPS1	GMFB	Gmfb
Q9DCZ1	GMPR1	GMPR1	Gmpr
Q9DC51	GNAI3	GNAI3	Gnai3
A0A0A6YVV2	A0A0A6YVV2	GPX1	Gpx1
B1AT92	B1AT92	GRB2	Grb2
D6REG4	D6REG4	GRHPR	Grhpr
A0A140T8R6	A0A140T8R6	GRM4	Grm4
Q99LP6	GRPE1	GRPE1	Grpel1
P47791	GSHR	GSHR	Gsr
E9QAQ5	E9QAQ5	GSK3B	Gsk3b
P24472	GSTA4	GSTA4	Gsta4
Q9DCM2	GSTK1	GSTK1	Gstk1
P48774	GSTM5	GSTM5	Gstm5
O09131	GSTO1	GSTO1	Gsto1
Q8C3X4	GUF1	GUF1	Guf1
E0CZ27	E0CZ27	H33	H3f3a
H3BJD0	H3BJD0	H3BJD0	Ppp1r9a
Q3UHX2	HAP28	HAP28	Pdap1
A0A0G2JDP0	A0A0G2JDP0	HAX1	Hax1
O88704	HCN1	HCN1	Hcn1
O88703	HCN2	HCN2	Hcn2
Q3UGR5	HDHD2	HDHD2	Hdhd2
Q9CYW4	HDHD3	HDHD3	Hdhd3
A0A140T8J4	A0A140T8J4	HEBP1	Hebp1
P36552	HEM6	HEM6	Cpox
P29416	HEXA	HEXA	Hexa
P20060	HEXB	HEXB	Hexb
Q3UMA3	Q3UMA3	HGS	Hgs
P70349	HINT1	HINT1	Hint1
A0A0R4J259	A0A0R4J259	HNRPQ	Syncrip
Q8BGZ1	HPCL4	HPCL4	Hpcal4
Q80WM4	HPLN4	HPLN4	Hapln4
P00493	HPRT	HPRT	Hprt1
Q9CQZ1	HSBP1	HSBP1	Hsbp1
A0A0R4J0T0	A0A0R4J0T0	HSC20	Hscb
Q2TPA8	HSDL2	HSDL2	Hsdl2
P17156	HSP72	HSP72	Hspa2
Q9JIY5	HTRA2	HTRA2	Htra2
Q8C729	HYCC2	HYCC2	Hycc2
E9PWK1	E9PWK1	HYEP	Ephx1
P34914	HYES	HYES	Ephx2
Q7TNC9	I5P1	I5P1	Inpp5a
O88844	IDHC	IDHC	Idh1
G3XA48	G3XA48	IDI1	Idi1
A0A0G2JGT5	A0A0G2JGT5	IF4E	Eif4e
Q9WUK2	IF4H	IF4H	Eif4h
Q8BVV6	Q8BVV6	IF5	Eif5
O35344	IMA4	IMA4	Kpna3
Q8R071	IP3KA	IP3KA	Itpka
Q8BKC5	IPO5	IPO5	Ipo5
Q9EPL8	IPO7	IPO7	Ipo7
Q9D819	IPYR	IPYR	Ppa1
A4GZ26	A4GZ26	IQEC2	Iqsec2
Q3TES0	IQEC3	IQEC3	Iqsec3
D3Z7W0	D3Z7W0	ISCU	Iscu
A2AKI5	A2AKI5	ITAV	Itgav
O89051	ITM2B	ITM2B	Itm2b
Q9D892	ITPA	ITPA	Itpa
E9Q3I4	E9Q3I4	ITSN1	Itsn1
Q9D8B7	JAM3	JAM3	Jam3
Q9WTP6	KAD2	KAD2	Ak2
B1B1A7	B1B1A7	KALRN	Kalrn
P05132	KAPCA	KAPCA	Prkaca
P68181	KAPCB	KAPCB	Prkacb
Q71RI9	KAT3	KAT3	Kyat3
E9PWY6	E9PWY6	KBL	Gcat
Q8BNW9	KBTBB	KBTBB	Kbtbd11
Q8BGR3	Q8BGR3	KCC4	Camk4
A0A0R4J2B2	A0A0R4J2B2	KCD12	Kctd12
Q5DTY9	KCD16	KCD16	Kctd16
Q3UFC0	Q3UFC0	KCIP4	Kcnip4
E9QKI2	E9QKI2	KCNC3	Kcnc3
Q9Z0V2	KCND2	KCND2	Kcnd2
Q64520	KGUA	KGUA	Guk1
F8WGN6	F8WGN6	KI21A	Kif21a
A0A087WQE8	A0A087WQE8	KIF1A	Kif1a
P28738	KIF5C	KIF5C	Kif5c
D3YXZ3	D3YXZ3	KLC2	Klc2
Q7TSH2	KPBB	KPBB	Phkb
P16054	KPCE	KPCE	Prkce
Q8R574	KPRB	KPRB	Prpsap2
Q91YP0	L2HDH	L2HDH	L2hgdh
O89112	LANC1	LANC1	Lancl1
Q9QXW9	LAT2	LAT2	Slc7a8
Q8VED9	LEGL	LEGL	Lgalsl
Q9CPU0	LGUL	LGUL	Glo1
O88951	LIN7B	LIN7B	Lin7b
O88952	LIN7C	LIN7C	Lin7c
B8QI34	B8QI34	LIPA2	Ppfia2
Q9D009	LIPT2	LIPT2	Lipt2
P24527	LKHA4	LKHA4	Lta4h
Q922Q8	LRC59	LRC59	Lrrc59
Q80WG5	LRC8A	LRC8A	Lrrc8a
P0DP60	LYNX1	LYNX1	Lynx1
D3YUG4	D3YUG4	LYPA1	Lypla1
Q9WTL7	LYPA2	LYPA2	Lypla2
Q8K215	LYRM4	LYRM4	Lyrm4
Q9DA03	LYRM7	LYRM7	Lyrm7
Q14BB9	MA6D1	MA6D1	Map6d1
A0A0R4J1F4	A0A0R4J1F4	MADD	Madd
Q4VBG2	Q4VBG2	MAGI1	Magi1
A0A0G2JE00	A0A0G2JE00	MAGI2	Magi2
Q8BHE8	MAIP1	MAIP1	Maip1
Q3TQP6	Q3TQP6	MAOX	Me1
Q61166	MARE1	MARE1	Mapre1
D3YYK8	D3YYK8	MARE2	Mapre2
Q8VHJ5	MARK1	MARK1	Mark1
Q8CHK3	MBOA7	MBOA7	Mboat7
Q9D1I5	MCEE	MCEE	Mcee
P56942	MCH	MCH	Pmch
Q9DCS3	MECR	MECR	Mecr
A0A0U1RNK6	A0A0U1RNK6	METK2	Mat2a
Q9CWE0	MFR1L	MFR1L	Mtfr1l
D3Z183	D3Z183	MFSD6	Mfsd6
D3YYS6	D3YYS6	MGLL	Mgll
Q8R404	MIC13	MIC13	Micos13
Q8VCX5	MICU1	MICU1	Micu1
Q4QQM5	MIGA1	MIGA1	Miga1
F7AMS7	F7AMS7	MINK1	Mink1
Q8JZN7	MIRO2	MIRO2	Rhot2
Q8R3Q6	MIX23	MIX23	Mix23
Q63844	MK03	MK03	Mapk3
Q61831	MK10	MK10	Mapk10
Q8VHK5	MLC1	MLC1	Mlc1
Q9D273	MMAB	MMAB	Mmab
P26041	MOES	MOES	Msn
P53986	MOT1	MOT1	Slc16a1
D3YXY8	D3YXY8	MP17L	Mpv17l
P47809	MP2K4	MP2K4	Map2k4
Q6XE40	Q6XE40	MPP3	Mpp3
Q9DC61	MPPA	MPPA	Pmpca
Q9CXT8	MPPB	MPPB	Pmpcb
D3YWI4	D3YWI4	MPV17	Mpv17
Q7TT50	MRCKB	MRCKB	Cdc42bpb
Q5NCE8	MRS2	MRS2	Mrs2
Q78J03	MSRB2	MSRB2	Msrb2
P28184	MT3	MT3	Mt3
Q9CRB8	MTFP1	MTFP1	Mtfp1
Q6ZPE2	MTMR5	MTMR5	Sbf1
P62774	MTPN	MTPN	Mtpn
Q9DAT5	MTU1	MTU1	Trmu
Q3UHK1	MYCT	MYCT	Slc2a13
Q5SYD0	MYO1D	MYO1D	Myo1d
E9PVU0	E9PVU0	MYO6	Myo6
Q9D328	NACHO	NACHO	Tmem35a
Q9EPN1	NBEA	NBEA	Nbea
Q91X97	NCALD	NCALD	Ncald
A0A0R4IZX5	A0A0R4IZX5	NCAN	Ncan
Q8BUN9	NCKX2	NCKX2	Slc24a2
P37040	NCPR	NCPR	Por
Q8BNY6	NCS1	NCS1	Ncs1
Q9WV85	NDK3	NDK3	Nme3
Q8BTG7	NDRG4	NDRG4	Ndrg4
O35683	NDUA1	NDUA1	Ndufa1
P0DN34	NDUB1	NDUB1	Ndufb1
Q9CPU2	NDUB2	NDUB2	Ndufb2
Q9CQZ6	NDUB3	NDUB3	Ndufb3
Q59J78	NDUF2	NDUF2	Ndufaf2
Q9JKL4	NDUF3	NDUF3	Ndufaf3
Q9D1H6	NDUF4	NDUF4	Ndufaf4
A2APY7	NDUF5	NDUF5	Ndufaf5
Q9CWG8	NDUF7	NDUF7	Ndufaf7
Q9DC07	LNEBL	NEBL	Nebl
Q91ZP9	NECA2	NECA2	Necab2
P29595	NEDD8	NEDD8	Nedd8
A0A0N4SUH8	A0A0N4SUH8	NFU1	Nfu1
Q8CHT1	NGEF	NGEF	Ngef
Q9EQ80	NIF3L	NIF3L	Nif3l1
Q8VDK1	NIT1	NIT1	Nit1
Q9JHW2	NIT2	NIT2	Nit2
Q3TL44	NLRX1	NLRX1	Nlrx1
P35436	NMDE1	NMDE1	Grin2a
Q8K4Z3	NNRE	NNRE	Naxe
Q3TF41	Q3TF41	NP1L1	Nap1l1
B7ZNL2	B7ZNL2	NP1L4	Nap1l4
E9Q2X2	E9Q2X2	NRX3A	Nrxn3
Q9CZ44	NSF1C	NSF1C	Nsfl1c
Q9JJY3	NSMA2	NSMA2	Smpd3
A2A9X5	A2A9X5	NT5C	Nt5c
Q8VCE6	NT5M	NT5M	Nt5m
P15209	NTRK2	NTRK2	Ntrk2
P03893	NU2M	NU2M	mt-Nd2
P03911	NU4M	NU4M	Mtnd4
Q9CWD8	NUBPL	NUBPL	Nubpl
O08600	NUCG	NUCG	Endog
O35685	NUDC	NUDC	Nudc
H3BLR8	H3BLR8	NUDT3	Nudt3
Q6P5U7	NWD2	NWD2	Nwd2
P29758	OAT	OAT	Oat
Q3U3J1	Q3U3J1	ODBA	Bckdha
Q6P3A8	ODBB	ODBB	Bckdhb
Q8CGY8	OGT1	OGT1	Ogt
B1AYJ9	B1AYJ9	OLA1	Ola1
Q64288	OMP	OMP	Omp
Q505D7	OPA3	OPA3	Opa3
Q9D8S4	ORN	ORN	Rexo2
A0A3Q4EG54	A0A3Q4EG54	OSBL1	Osbpl1a
Q8VE38	OXND1	OXND1	Oxnad1
Q4KMM3	OXR1	OXR1	Oxr1
Q9D404	OXSM	OXSM	Oxsm
Q9DCC4	P5CR3	P5CR3	Pycr3
P50580	PA2G4	PA2G4	Pa2g4
P29341	PABP1	PABP1	Pabpc1
Q9WVE8	PACN2	PACN2	Pacsin2
Q08642	PADI2	PADI2	Padi2
A0A3Q4L2Q3	A0A3Q4L2Q3	PAPD1	Mtpap
P60335	PCBP1	PCBP1	Pcbp1
A0A2R8VHP9	A0A2R8VHP9	PCBP2	Pcbp2
A0A0R4J0G0	A0A0R4J0G0	PCKGM	Pck2
Q9CQF9	PCYOX	PCYOX	Pcyox1
P56812	PDCD5	PDCD5	Pdcd5
P12815	PDCD6	PDCD6	Pdcd6
A0A2I3BPC1	A0A2I3BPC1	PDE1B	Pde1b
F6SQH7	F6SQH7	PDIP2	Poldip2
Q7TSQ8	PDPR	PDPR	Pdpr
B1AZQ0	B1AZQ0	PENK	Penk
D3YYH0	D3YYH0	PEX5R	Pex5l
Q8BX10	PGAM5	PGAM5	Pgam5
Q61282	PGCA	PGCA	Acan
Q8CAA7	PGM2L	PGM2L	Pgm2l1
Q8CHP8	PGP	PGP	Pgp
Q8BHF7	PGPS1	PGPS1	Pgs1
O55022	PGRC1	PGRC1	Pgrmc1
Q80UU9	PGRC2	PGRC2	Pgrmc2
Q8BGT8	PHIPL	PHIPL	Phyhipl
Q9DAK9	PHP14	PHP14	Phpt1
Q8K0S0	PHYIP	PHYIP	Phyhip
Q80XI4	PI42B	PI42B	Pip4k2b
Q91XU3	PI42C	PI42C	Pip4k2c
Q7M6Y3	PICAL	PICAL	Picalm
Q9QUR7	PIN1	PIN1	Pin1
P53810	PIPNA	PIPNA	Pitpna
D3YZT7	D3YZT7	PKHB1	Plekhb1
Q02257	PLAK	PLAK	Jup
A0A0R4J263	A0A0R4J263	PLCA	Agpat1
Q9D1E8	PLCE	PLCE	Agpat5
Q8K394	PLCL2	PLCL2	Plcl2
G3X9A7	G3X9A7	PLCX3	Plcxd3
Q9DCU2	PLLP	PLLP	Pllp
Q9Z2Y8	PLPHP	PLPHP	Plpbp
E9PXB0	E9PXB0	PLPL8	Pnpla8
P60487	PLPP	PLPP	Pdxp
A0A1C7CYV0	A0A1C7CYV0	PLST	Pls3
Q80UG2	PLXA4	PLXA4	Plxna4
Q8CJH3	PLXB1	PLXB1	Plxnb1
Q69ZP3	PNKD	PNKD	Pnkd
Q543K9	Q543K9	PNPH	Pnp
Q8K1R3	PNPT1	PNPT1	Pnpt1
P62141	PP1B	PP1B	Ppp1cb
Q3UM45	PP1R7	PP1R7	Ppp1r7
E0CZ78	E0CZ78	PP2BB	Ppp3cb
Q8BP40	PPA6	PPA6	Acp6
Q9D358	PPAC	PPAC	Acp1
Q9QUR6	PPCE	PPCE	Prep
Q9CR16	PPID	PPID	Ppid
Q99KR7	PPIF	PPIF	Ppif
P49443	PPM1A	PPM1A	Ppm1a
Q80TL0	PPM1E	PPM1E	Ppm1e
Q8BVQ5	PPME1	PPME1	Ppme1
P51175	PPOX	PPOX	Ppox
F7BX26	F7BX26	PPP5	Ppp5c
Q60829	PPR1B	PPR1B	Ppp1r1b
O88531	PPT1	PPT1	Ppt1
Q6NVE9	PPTC7	PPTC7	Pptc7
Q8R5J9	PRAF3	PRAF3	Arl6ip5
Q69ZK0	PREX1	PREX1	Prex1
P04925	PRIO	PRIO	Prnp
A0A0N4SVB5	A0A0N4SVB5	PRRT3	Prrt3
A2AGN7	A2AGN7	PRS6A	Psmc3
A0A140LIZ5	A0A140LIZ5	PRS6B	Psmc4
Q8BIW1	PRUN1	PRUN1	Prune1
Q9R1P4	PSA1	PSA1	Psma1
P49722	PSA2	PSA2	Psma2
E0CX62	E0CX62	PSA3	Psma3
E0CXB1	E0CXB1	PSA6	Psma6
Q9Z2U0	PSA7	PSA7	Psma7
A0A338P7F1	A0A338P7F1	PSB1	Psmb1
O55234	PSB5	PSB5	Psmb5
Q60692	PSB6	PSB6	Psmb6
Q8BG32	PSD11	PSD11	Psmd11
Q3TRH2	Q3TRH2	PSD12	Psmd12
O35593	PSDE	PSDE	Psmd14
Q3TXS7	PSMD1	PSMD1	Psmd1
Q8VDM4	PSMD2	PSMD2	Psmd2
P14685	PSMD3	PSMD3	Psmd3
Q99JI4	PSMD6	PSMD6	Psmd6
P26516	PSMD7	PSMD7	Psmd7
G3UWN9	G3UWN9	PSME1	Psme1
P35235	PTN11	PTN11	Ptpn11
P58389	PTPA	PTPA	Ptpa
Q66GT5	PTPM1	PTPM1	Ptpmt1
Q91V35	Q91V35	PTPRA	Ptpra
B9EJA3	B9EJA3	PTPRD	Ptprd
A6MDD2	A6MDD2	PTPRN	Ptprn
B0V2N1	PTPRS	PTPRS	Ptprs
Q64737	PUR2	PUR2	Gart
Q9DCL9	PUR6	PUR6	Paics
E9Q242	E9Q242	PUR8	Adsl
Q9CWJ9	PUR9	PUR9	Atic
P46664	PURA2	PURA2	Adss2
O35295	PURB	PURB	Purb
Q9DB60	PXL2B	PXL2B	Prxl2b
O35435	PYRD	PYRD	Dhodh
Q6DFY2	Q6DFY2	Q6DFY2	Opcml
Q7TNL5	Q7TNL5	Q7TNL5	Ppp2r5d
Q8VBU5	Q8VBU5	Q8VBU5	Pde4b
Q91VA7	Q91VA7	Q91VA7	Idh3b
Q9D6D0	Q9D6D0	Q9D6D0	Slc25a27
Q9D881	Q9D881	Q9D881	Cox5b-ps
Q9JKY7	Q9JKY7	Q9JKY7	Cyp2d22
Q9Z1R9	Q9Z1R9	Q9Z1R9	Prss1
A0A0A6YXR4	A0A0A6YXR4	QOR	Cryz
Q3UNZ8	QORL2	QORL2	Cryzl2
A2CG35	A2CG35	RAB12	Rab12
Q9D4I9	Q9D4I9	RAB23	Rab23
P35290	RAB24	RAB24	Rab24
Q9CZT8	RAB3B	RAB3B	Rab3b
Q9CQD1	RAB5A	RAB5A	Rab5a
P61294	RAB6B	RAB6B	Rab6b
Q8BHH2	RAB9B	RAB9B	Rab9b
Q5U3K5	RABL6	RABL6	Rabl6
P68040	RACK1	RACK1	Rack1
P62827	RAN	RAN	Ran
P34022	RANG	RANG	Ranbp1
P32883	RASK	RASK	Kras
Q9Z268	RASL1	RASL1	Rasal1
O08989	RASM	RASM	Mras
Q8BHC1	RB39B	RB39B	Rab39b
F8VPM7	F8VPM7	RB6I2	Erc1
O88851	RBBP9	RBBP9	Rbbp9
Q8BP92	RCN2	RCN2	Rcn2
P54728	RD23B	RD23B	Rad23b
A0A0R4J1N8	A0A0R4J1N8	RDH13	Rdh13
Q8VCD6	REEP2	REEP2	Reep2
A0A087WSS1	A0A087WSS1	RELCH	Relch
Q8CHX7	RFTN2	RFTN2	Rftn2
A0A087WNZ9	A0A087WNZ9	RGS6	Rgs6
A2AH25	A2AH25	RHG01	Arhgap1
G3UWM5	G3UWM5	RHG21	Arhgap21
Q811P8	RHG32	RHG32	Arhgap32
Q5SSM3	RHG44	RHG44	Arhgap44
P84096	RHOG	RHOG	Rhog
Q6ZWV3	RL10	RL10	Rpl10
Q9CZM2	RL15	RL15	Rpl15
O09167	RL21	RL21	Rpl21
Q8BP67	RL24	RL24	Rpl24
B1ARA3	B1ARA3	RL26	Rpl26
P41105	RL28	RL28	Rpl28
P62889	RL30	RL30	Rpl30
Q9D1R9	RL34	RL34	Rpl34
Q9D8E6	RL4	RL4	Rpl4
P47911	RL6	RL6	Rpl6
Q99N96	RM01	RM01	Mrpl1
A0A1L1SU47	A0A1L1SU47	RM03	Mrpl3
Q9DCU6	RM04	RM04	Mrpl4
Q3UK02	Q3UK02	RM09	Mrpl9
Q3TBW2	RM10	RM10	Mrpl10
Q9CPR5	RM15	RM15	Mrpl15
Q99N93	RM16	RM16	Mrpl16
Q9D338	RM19	RM19	Mrpl19
Q9CQL4	RM20	RM20	Mrpl20
Q8BU88	RM22	RM22	Mrpl22
O35972	RM23	RM23	Mrpl23
Q9CQ06	RM24	RM24	Mrpl24
Q921S7	RM37	RM37	Mrpl37
Q8K2M0	RM38	RM38	Mrpl38
Q9CY73	RM44	RM44	Mrpl44
Q9D0Q7	RM45	RM45	Mrpl45
Q9EQI8	RM46	RM46	Mrpl46
A0A140LHT6	A0A140LHT6	RM48	Mrpl48
Q8VDT9	RM50	RM50	Mrpl50
Q9D1H8	RM53	RM53	Mrpl53
Q9CZ83	RM55	RM55	Mrpl55
Q9DCV4	RMD1	RMD1	Rmdn1
Q3UJU9	RMD3	RMD3	Rmdn3
Q8CI78	RMND1	RMND1	Rmnd1
Q9JI90	RNF14	RNF14	Rnf14
A0A1B0GSG5	A0A1B0GSG5	RNH1	Rnh1
Q3TDK6	ROGDI	ROGDI	Rogdi
A0A0A6YWG7	A0A0A6YWG7	RPGF2	Rapgef2
A2ALS5	RPGP1	RPGP1	Rap1gap
J3QMX0	J3QMX0	RPP14	Rpp14
P62071	RRAS2	RRAS2	Rras2
Q9D6S7	RRFM	RRFM	Mrrf
Q921R2	Q921R2	RS13	Rps13
P62264	RS14	RS14	Rps14
D3YVB4	D3YVB4	RS15A	Rps15a
P63276	RS17	RS17	Rps17
P60867	RS20	RS20	Rps20
A0A1L1SQA8	A0A1L1SQA8	RS25	Rps25
P62855	RS26	RS26	Rps26
A0A0G2JDW7	A0A0G2JDW7	RS27	Rps27
P62082	RS7	RS7	Rps7
Q6ZWN5	RS9	RS9	Rps9
P14206	RSSA	RSSA	Rpsa
Q924T2	RT02	RT02	Mrps2
Q99N87	RT05	RT05	Mrps5
P58064	RT06	RT06	Mrps6
Q80X85	RT07	RT07	Mrps7
Q9D7N3	RT09	RT09	Mrps9
G5E8U5	G5E8U5	RT10	Mrps10
Q3U8Y1	Q3U8Y1	RT11	Mrps11
F7ARZ1	F7ARZ1	RT23	Mrps23
Q9CQV5	RT24	RT24	Mrps24
Q8BK72	RT27	RT27	Mrps27
Q9CY16	RT28	RT28	Mrps28
G3X9M0	G3X9M0	RT29	Dap3
Q61733	RT31	RT31	Mrps31
Q9JIK9	RT34	RT34	Mrps34
A0A0R4J0L6	A0A0R4J0L6	RT35	Mrps35
A0A0R4J0S3	A0A0R4J0S3	RT4I1	Rtn4ip1
Q9CQE8	RTRAF	RTRAF	RTRAF
F6U7V1	F6U7V1	RYR2	Ryr2
Q91V77	Q91V77	S10A1	S100a1
P63084	S10A5	S10A5	S100a5
E9QM38	E9QM38	S12A2	Slc12a2
Q80UP8	S20A2	S20A2	Slc20a2
Q9Z306	S22A4	S22A4	Slc22a4
Q3UHH2	S22AN	S22AN	Slc22a23
Q9QXX4	S2513	S2513	Slc25a13
Q3TZX3	S2533	S2533	Slc25a33
Q8BGP6	S2540	S2540	Slc25a40
Q8R0Y8	S2542	S2542	Slc25a42
Q9CQS4	S2546	S2546	Slc25a46
Q8VEM8	MPCP	S25A3	Slc25a3
Q60714	S27A1	S27A1	Slc27a1
Q8K2P7	S38A1	S38A1	Slc38a1
Q5FWH7	S39AC	S39AC	Slc39a12
Q8BXR1	S7A14	S7A14	Slc7a14
P50247	SAHH	SAHH	Ahcy
J3QPG5	J3QPG5	SAP	Psap
A0A1W2P6N3	A0A1W2P6N3	SAR1A	Sar1a
Q99LB7	SARDH	SARDH	Sardh
A0A0G2JF08	A0A0G2JF08	SC22B	Sec22b
E9Q1S3	E9Q1S3	SC23A	Sec23a
Q6PGE7	SC6A7	SC6A7	Slc6a7
P16014	SCG1	SCG1	Chgb
Q4W8U9	Q4W8U9	SCG2	Scg2
Q8BMD8	SCMC1	SCMC1	Slc25a24
P97952	SCN1B	SCN1B	Scn1b
O35114	SCRB2	SCRB2	Scarb2
Q3TMH2	SCRN3	SCRN3	Scrn3
Q9Z2Q6	SEPT5	SEPT5	Septin5
Q9CX34	SGT1	SGT1	Sugt1
Q8BJU0	SGTA	SGTA	Sgta
Q62419	SH3G1	SH3G1	Sh3gl1
A0A0R4J0B8	A0A0R4J0B8	SH3G3	Sh3gl3
Q9JJU8	SH3L1	SH3L1	Sh3bgrl
A0A0G2JEC4	A0A0G2JEC4	SHLB1	Sh3glb1
Q4VBF8	Q4VBF8	SI1L1	Sipa1l1
Q8K2C6	SIR5	SIR5	Sirt5
Q61165	SL9A1	SL9A1	Slc9a1
Q9D8T7	SLIRP	SLIRP	Slirp
Q3TJ56	Q3TJ56	SND1	Snd1
Q8R570	SNP47	SNP47	Snap47
Q6NZD2	Q6NZD2	SNX1	Snx1
O70493	SNX12	SNX12	Snx12
Q9CWK8	SNX2	SNX2	Snx2
Q3UHD6	SNX27	SNX27	Snx27
Q78ZM0	Q78ZM0	SNX3	Snx3
Q91YJ2	SNX4	SNX4	Snx4
A0A1W2P701	A0A1W2P701	SNX6	Snx6
Q6P069	SORCN	SORCN	Sri
F8WIV2	F8WIV2	SPB6	Serpinb6a
D3YXB7	D3YXB7	SPG7	Spg7
Q9ESJ4	SPN90	SPN90	Nckipsd
Q924S8	SPRE1	SPRE1	Spred1
Q91WK1	SPRY4	SPRY4	Spryd4
Q3UGX2	Q3UGX2	SPTB	Sptb
P05480	SRC	SRC	Src
Q921L6	Q921L6	SRC8	Cttn
A0A087WNM1	A0A087WNM1	SRGP2	Srgap2
Q64674	SPEE	SRMS	Srm
Q9QZX7	SRR	SRR	Srr
Q8R2K3	Q8R2K3	SSBP	Ssbp1
A0A286YCG8	A0A286YCG8	SSRA	Ssr1
P63046	ST4A1	ST4A1	Sult4a1
Q3UGN9	Q3UGN9	STAM1	Stam
Q5DQR4	STB5L	STB5L	Stxbp5l
Q9Z1Z2	STRAP	STRAP	Strap
F8WH41	F8WH41	STRN	Strn
A0A1B0GS08	A0A1B0GS08	STUM	Stum
Q8BH40	Q8BH40	STX7	Stx7
Q60770	STXB3	STXB3	Stxbp3
Q3TYA4	Q3TYA4	STXB6	Stxbp6
Q8R086	SUOX	SUOX	Suox
Q80YD1	SUV3	SUV3	Supv3l1
A2RSH4	A2RSH4	SV2C	Sv2c
Q8BGQ7	SYAC	SYAC	Aars1
G3X975	G3X975	SYCM	Cars2
Q922B2	SYDC	SYDC	Dars1
Q8BIP0	SYDM	SYDM	Dars2
Q8CGC7	SYEP	SYEP	Eprs1
E9PWY9	E9PWY9	SYFA	Farsa
Q8R2P8	Q8R2P8	SYK	Kars
Q8VDC0	SYLM	SYLM	Lars2
Q499X9	SYMM	SYMM	Mars2
Q8JZP2	SYN3	SYN3	Syn3
A0A494BB89	A0A494BB89	SYNC	Nars
A0A1L1STC6	A0A1L1STC6	SYNE1	Syne1
Q8BGV0	SYNM	SYNM	Nars2
D6RFU9	D6RFU9	SYPL1	Sypl
A8Y5T6	A8Y5T6	SYPM	Pars2
Q9D0I9	SYRC	SYRC	Rars1
Q8C483	Q8C483	SYSC	Sars
Q920N7	SYT12	SYT12	Syt12
G3X9Y1	G3X9Y1	SYT3	Syt3
A0A498WGM0	A0A498WGM0	SYT7	Syt7
P32921	SYWC	SYWC	Wars1
Q91WQ3	SYYC	SYYC	Yars1
Q8BYL4	SYYM	SYYM	Yars2
Q9D8Y1	T126A	T126A	Tmem126a
Q8K0Z7	TACO1	TACO1	Taco1
A0A1B0GR11	A0A1B0GR11	TALDO	Taldo1
Q3TUH1	TAM41	TAM41	Tamm41
Q5F2E8	TAOK1	TAOK1	Taok1
Q7TMM9	TBB2A	TBB2A	Tubb2a
Q9CWF2	TBB2B	TBB2B	Tubb2b
Q80VP0	TCPR1	TCPR1	Tecpr1
D3Z7C6	D3Z7C6	TEBP	Ptges3
G3UWE1	G3UWE1	TECR	Tecr
A0A0R4J1N9	A0A0R4J1N9	TFAM	Tfam
A0A3B2WAL8	A0A3B2WAL8	THIC	Acat2
G3UZY2	G3UZY2	THIOM	Txn2
Q9Z0V7	TI17B	TI17B	Timm17b
P62073	TIM10	TIM10	Timm10
P62075	TIM13	TIM13	Timm13
Q8BGX2	TIM29	TIM29	Timm29
Q9WVA2	TIM8A	TIM8A	Timm8a1
P62077	TIM8B	TIM8B	Timm8b
Q99KW9	TIP	TIP	Itfg1
Q71LX4	TLN2	TLN2	Tln2
Q8C996	TM163	TM163	Tmem163
Q8BPE4	TM177	TM177	Tmem177
Q5SRX1	TM1L2	TM1L2	Tom1l2
Q5F285	TM256	TM256	Tmem256
A0A0R4J1Z3	A0A0R4J1Z3	TMM33	Tmem33
Q8BXZ1	TMX3	TMX3	Tmx3
Q8C0L0	TMX4	TMX4	Tmx4
E9PV58	E9PV58	TNPO2	Tnpo2
Q9QZ06	TOLIP	TOLIP	Tollip
Q3UDC3	Q3UDC3	TOM1	Tom1
Q9DCC8	TOM20	TOM20	Tomm20
Q9QYA2	TOM40	TOM40	Tomm40
B1AXP6	TOM5	TOM5	Tomm5
Q9D173	TOM7	TOM7	Tomm7
Q9DAM5	TPC	TPC	Slc25a19
D3Z125	D3Z125	TPD52	Tpd52
F6VQ81	F6VQ81	TPD54	Tpd52l2
O89023	TPP1	TPP1	Tpp1
Q64514	TPP2	TPP2	Tpp2
O55013	TPPC3	TPPC3	Trappc3
Q9DBS2	TPRGL	TPRGL	Tprg1l
Q3UHJ1	Q3UHJ1	TRAF3	Traf3
Q921I1	TRFE	TRFE	Tf
Q3UHH4	Q3UHH4	TRIM2	Trim2
Q3TDT0	Q3TDT0	TRIM3	Trim3
Q0KL02	TRIO	TRIO	Trio
Q8K1J6	TRNT1	TRNT1	Trnt1
Q9JMH6	TRXR1	TRXR1	Txnrd1
A0A0M3HEP9	A0A0M3HEP9	TRXR2	Txnrd2
A0A0G2JDX4	A0A0G2JDX4	TSN2	Tspan2
Q3UHG5	Q3UHG5	TSN7	Tspan7
A0A1Y7VL44	A0A1Y7VL44	TTC7B	Ttc7b
A0A1L1SR84	A0A1L1SR84	TUTLB	Igsf9b
Q91YR1	TWF1	TWF1	Twf1
Q9Z0P5	TWF2	TWF2	Twf2
A0A0R4J1Y7	A0A0R4J1Y7	TXND5	Txndc5
A0A494B955	A0A494B955	TXNL1	Txnl1
P24529	TY3H	TY3H	Th
A0A0G2JE32	A0A0G2JE32	UB2D3	Ube2d3
A0A338P7E5	A0A338P7E5	UB2L3	Ube2l3
Q9CZY3	UB2V1	UB2V1	Ube2v1
F6WMC0	F6WMC0	UBC12	Ube2m
Q6ZPJ3	UBE2O	UBE2O	Ube2o
E9PYI8	E9PYI8	UBP14	Usp14
Q9QZM0	UBQL2	UBQL2	Ubqln2
Q99PL6	UBXN6	UBXN6	Ubxn6
P56501	UCP3	UCP3	Ucp3
P61961	UFM1	UFM1	Ufm1
Q91ZJ5	UGPA	UGPA	Ugp2
H3BJZ7	H3BJZ7	UN13A	Unc13a
Q9Z1Z0	USO1	USO1	Uso1
Q4FE56	Q4FE56	USP9X	Usp9x
Q80WQ2	VAC14	VAC14	Vac14
Q9R1Q9	VAS1	VAS1	Atp6ap1
Q80TB8	VAT1L	VAT1L	Vat1l
Q9D1K2	VATF	VATF	Atp6v1f
Q9CR51	VATG1	VATG1	Atp6v1g1
E9Q9C5	E9Q9C5	VATL	Atp6v0c
Q0VGU4	VGF	VGF	Vgf
A0A087WP83	A0A087WP83	VIGLN	Hdlbp
Q64727	VINC	VINC	Vcl
Q5H8C4	VP13A	VP13A	Vps13a
Q8BX70	VP13C	VP13C	Vps13c
P40336	VP26A	VP26A	Vps26a
Q8C0E2	VP26B	VP26B	Vps26b
Q9D2N9	VP33A	VP33A	Vps33a
D3Z645	D3Z645	VPS29	Vps29
P97390	VPS45	VPS45	Vps45
Q8VEJ9	VPS4A	VPS4A	Vps4a
Q8CI71	VPS50	VPS50	Vps50
Q8R5H6	WASF1	WASF1	Wasf1
A0A1D5RLV7	A0A1D5RLV7	WDFY3	Wdfy3
Q8CBE3	WDR37	WDR37	Wdr37
Q8CGF6	WDR47	WDR47	Wdr47
Q8BH57	WDR48	WDR48	Wdr48
Q3UN10	Q3UN10	WFS1	Wfs1
E0CYT1	E0CYT1	WNK2	Wnk2
Q6P5F9	XPO1	XPO1	Xpo1
E9Q1T9	E9Q1T9	XPO2	Cse1l
A0A494BBG8	A0A494BBG8	XPP1	Xpnpep1
B7ZMP1	XPP3	XPP3	Xpnpep3
Q9EPK2	XRP2	XRP2	Rp2
Q60738	ZNT1	ZNT1	Slc30a1
P97441	ZNT3	ZNT3	Slc30a3
Q5IRJ6	ZNT9	ZNT9	Slc30a9
A0A3B2WBH9	A0A3B2WBH9	ZO2	Tjp2
RT Cal Mix	RT Cal Mix		RT Cal Mix

## Sheet: M. Lipofuscin Consensus n = 688
6-Way Consensus Mouse Lipofuscin Proteome (n = 688)
UniProt Accession	SWISSPROT Accession	UniProt ID	Gene Name	Brain Palmitome (Gorenberg et al., 2022) (n = 660)	PPT1 Substrates (Gorenberg et al., 2022) (n = 102)	Rat & Human Brain Lipofuscin (Ottis et al., 2012) (n = 44)	Human Brain Lipofuscin (This Paper) (n = 513)
1433E	P62259	1433E	Ywhae	x		x	x
1433G	P61982	1433G	Ywhag	x		x	x
1433Z	P63101	1433Z	Ywhaz	x		x	x
ATP5H	Q9DCX2	ATP5H	Atp5pd	x		x	x
ATPA	Q03265	ATPA	Atp5f1a	x		x	x
ATPB	P56480	ATPB	Atp5f1b	x		x	x
ATPO	Q9DB20	ATPO	Atp5po	x	x	x	x
BASP1	Q91XV3	BASP1	Basp1	x		x	x
CH60	P63038	CH60	Hspd1	x		x	x
CN37	P16330	CN37	Cnp	x		x	x
COX5A	P12787	COX5A	Cox5a	x		x	x
DPYL2	O08553	DPYL2	Dpysl2	x		x	x
DYN1	P39053	DYN1	Dnm1	x	x	x	x
ENOG	P17183	ENOG	Eno2	x		x	x
GBB1	P62874	GBB1	Gnb1	x		x	x
GFAP	P03995	GFAP	Gfap	x		x	x
GNAO	P18872	GNAO	Gnao1	x	x	x	x
KCC2A	P11798	KCC2A	Camk2a	x		x	x
KCRB	Q04447	KCRB	Ckb	x	x	x	x
KCRU	P30275	KCRU	Ckmt1	x		x	x
NDUS3	Q9DCT2	NDUS3	Ndufs3	x		x	x
NFL	P08551	NFL	Nefl	x		x	x
PPIA	P17742	PPIA	Ppia	x		x	x
SNP25	P60879	SNP25	Snap25	x		x	x
STX1B	P61264	STX1B	Stx1b	x		x	x
STXB1	O08599	STXB1	Stxbp1	x	x	x	x
TBB3	Q9ERD7	TBB3	Tubb3	x		x	x
TBB4A	Q9D6F9	TBB4A	Tubb4a	x		x	x
TBB5	P99024	TBB5	Tubb5	x		x	x
TPIS	P17751	TPIS	Tpi1	x		x	x
TPPP	Q7TQD2	TPPP	Tppp	x		x	x
UCHL1	Q9R0P9	UCHL1	Uchl1	x		x	x
VATE1	P50518	VATE1	Atp6v1e1	x	x	x	x
VDAC1	Q60932	VDAC1	Vdac1	x		x	x
1433B	Q9CQV8	1433B	Ywhab	x	x		x
1433F	P68510	1433F	Ywhah	x			x
1433T	P68254	1433T	Ywhaq	x			x
2AAA	Q76MZ3	2AAA	Ppp2r1a	x			x
3HIDH	Q99L13	3HIDH	Hibadh	x			x
4F2	P10852	4F2	Slc3a2	x			x
AAK1	Q3UHJ0	AAK1	Aak1	x			x
AATC	P05201	AATC	Got1	x			x
AATM	P05202	AATM	Got2	x			x
ABCB7	Q61102	ABCB7	Abcb7	x			x
ABHDA	Q6PE15	ABHDA	Abhd10	x			x
ABLM2	Q8BL65	ABLM2	Ablim2	x			x
ACAD9	Q8JZN5	ACAD9	Acad9	x			x
ACADM	P45952	ACADM	Acadm	x			x
ACADV	P50544	ACADV	Acadvl	x			x
ACBG1	Q99PU5	ACBG1	Acsbg1	x			x
ACDSB	Q9DBL1	ACDSB	Acadsb	x			x
ACO13	Q9CQR4	ACO13	Acot13	x			x
ACON	Q99KI0	ACON	Aco2	x	x		x
ACOT9	Q9R0X4	ACOT9	Acot9	x			x
ACSF2	Q8VCW8	ACSF2	Acsf2	x	x		x
ACSL6	Q91WC3	ACSL6	Acsl6	x			x
ADDB	Q9QYB8	ADDB	Add2	x			x
ADDG	Q9QYB5	ADDG	Add3	x	x		x
ADT1	P48962	ADT1	Slc25a4	x			x
ADT2	P51881	ADT2	Slc25a5	x			x
AFG32	Q8JZQ2	AFG32	Afg3l2	x			x
AGK	Q9ESW4	AGK	Agk	x			x
AINX	P46660	AINX	Ina	x			x
AK1A1	Q9JII6	AK1A1	Akr1a1	x			x
AL1B1	Q9CZS1	AL1B1	Aldh1b1	x			x
AL1L1	Q8R0Y6	AL1L1	Aldh1l1	x	x		x
AL4A1	Q8CHT0	AL4A1	Aldh4a1	x			x
AL7A1	Q9DBF1	AL7A1	Aldh7a1	x			x
AL9A1	Q9JLJ2	AL9A1	Aldh9a1	x			x
ALDH2	P47738	ALDH2	Aldh2	x			x
ALDOA	P05064	ALDOA	Aldoa	x			x
ALDOC	P05063	ALDOC	Aldoc	x			x
ALDR	P45376	ALDR	Akr1b1	x			x
AMPL	Q9CPY7	AMPL	Lap3	x			x
ANXA5	P48036	ANXA5	Anxa5	x			x
ANXA6	P14824	ANXA6	Anxa6	x			x
AOFA	Q64133	AOFA	Maoa	x			x
AOFB	Q8BW75	AOFB	Maob	x			x
AP180	Q61548	AP180	Snap91	x			x
AP1B1	O35643	AP1B1	Ap1b1	x			x
AP2A1	P17426	AP2A1	Ap2a1	x	x		x
AP2A2	P17427	AP2A2	Ap2a2	x			x
AP2B1	Q9DBG3	AP2B1	Ap2b1	x	x		x
AP3D1	O54774	AP3D1	Ap3d1	x			x
ARC1A	Q9R0Q6	ARC1A	Arpc1a	x			x
ARF3	P61205	ARF3	Arf3				x
ARP2	P61161	ARP2	Actr2	x			x
ARP3	Q99JY9	ARP3	Actr3	x			x
ARP5L	Q9D898	ARP5L	Arpc5l	x			x
ARPC2	Q9CVB6	ARPC2	Arpc2	x			x
ARPC4	P59999	ARPC4	Arpc4	x			x
ARPC5	Q9CPW4	ARPC5	Arpc5	x			x
ASAH1	Q9WV54	ASAH1	Asah1	x			x
ASGL1	Q8C0M9	ASGL1	Asrgl1	x			x
AT1A1	Q8VDN2	AT1A1	Atp1a1	x	x		x
AT1A2	Q6PIE5	AT1A2	Atp1a2	x	x		x
AT1B1	P14094	AT1B1	Atp1b1	x	x		x
AT1B2	P14231	AT1B2	Atp1b2	x	x		x
AT2A2	O55143	AT2A2	Atp2a2	x			x
AT2B1	G5E829	AT2B1	Atp2b1	x			x
AT5F1	Q9CQQ7	AT5F1	Atp5pb	x			x
ATLA1	Q8BH66	ATLA1	Atl1	x			x
ATP5E	P56382	ATP5E	Atp5f1e	x			x
ATP5I	Q06185	ATP5I	Atp5me	x			x
ATP5J	P97450	ATP5J	Atp5pf				x
ATP8	P03930	ATP8	Mtatp8				x
ATPD	Q9D3D9	ATPD	Atp5f1d	x			x
ATPK	P56135	ATPK	Atp5mf	x			x
ATPMK	Q78IK2	ATPMK	Atp5mk				x
AUXI	Q80TZ3	AUXI	Dnajc6	x			x
BASI	P18572	BASI	Bsg	x	x		x
BCS1	Q9CZP5	BCS1	Bcs1l	x			x
BDH	Q80XN0	BDH	Bdh1	x			x
BIN1	O08539	BIN1	Bin1	x			x
BIP	P20029	BIP	Hspa5				x
BPHL	Q8R164	BPHL	Bphl	x			x
BSN	O88737	BSN	Bsn	x			x
C1TM	Q3V3R1	C1TM	Mthfd1l	x			x
CAD13	Q9WTR5	CAD13	Cdh13	x			x
CADM1	Q8R5M8	CADM1	Cadm1	x			x
CADM4	Q8R464	CADM4	Cadm4	x			x
CAH2	P00920	CAH2	Ca2	x			x
CALB2	Q08331	CALB2	Calb2	x			x
CALM1	P0DP26	CALM1	Calm1	x			x
CALR	P14211	CALR	Calr	x			x
CALX	P35564	CALX	Canx	x			x
CAMKV	Q3UHL1	CAMKV	Camkv	x			x
CAN2	O08529	CAN2	Capn2	x			x
CANB1	Q63810	CANB1	Ppp3r1	x			x
CAND1	Q6ZQ38	CAND1	Cand1	x			x
CAP1	P40124	CAP1	Cap1	x			x
CAPS1	Q80TJ1	CAPS1	Cadps	x	x		x
CAPZB	P47757	CAPZB	Capzb	x			x
CAZA2	P47754	CAZA2	Capza2	x			x
CBPE	Q00493	CBPE	Cpe	x	x		x
CBR1	P48758	CBR1	Cbr1	x			x
CBR4	Q91VT4	CBR4	Cbr4	x			x
CEND	Q9JKC6	CEND	Cend1	x			x
CH10	Q64433	CH10	Hspe1	x			x
CISD1	Q91WS0	CISD1	Cisd1	x	x		x
CISY	Q9CZU6	CISY	Cs	x	x		x
CLCB	Q6IRU5	CLCB	Cltb	x			x
CLIC4	Q9QYB1	CLIC4	Clic4	x			x
CMPK2	Q3U5Q7	CMPK2	Cmpk2	x			x
CNTN1	P12960	CNTN1	Cntn1	x			x
CNTP1	O54991	CNTP1	Cntnap1	x			x
COF1	P18760	COF1	Cfl1	x			x
COQ3	Q8BMS4	COQ3	Coq3	x			x
COX2	P00405	COX2	Mtco2	x	x		x
COX3	P00416	COX3	mt-Co3				x
COX41	P19783	COX41	Cox4i1	x	x		x
COX6C	Q9CPQ1	COX6C	Cox6c	x			x
CPLX2	P84086	CPLX2	Cplx2	x			x
CPT2	P52825	CPT2	Cpt2	x			x
CSK21	Q60737	CSK21	Csnk2a1	x			x
CSKI1	Q6P9K8	CSKI1	Caskin1	x			x
CSKP	O70589	CSKP	Cask	x			x
CSPG5	Q71M36	CSPG5	Cspg5	x			x
CSRP1	P97315	CSRP1	Csrp1	x			x
CTNA2	Q61301	CTNA2	Ctnna2	x	x		x
CTNB1	Q02248	CTNB1	Ctnnb1	x			x
CX6B1	P56391	CX6B1	Cox6b1	x			x
CX7A2	P48771	CX7A2	Cox7a2	x			x
CXA1	P23242	CXA1	Gja1	x			x
CY1	Q9D0M3	CY1	Cyc1	x			x
CYC	P62897	CYC	Cycs	x			x
D39U1	Q5M8N4	D39U1	Sdr39u1	x			x
DCE1	P48318	DCE1	Gad1	x	x		x
DCTN2	Q99KJ8	DCTN2	Dctn2	x			x
DDAH1	Q9CWS0	DDAH1	Ddah1	x			x
DECR	Q9CQ62	DECR	Decr1	x			x
DEST	Q9R0P5	DEST	Dstn	x	x		x
DHB8	P50171	DHB8	Hsd17b8	x			x
DHE3	P26443	DHE3	Glud1	x			x
DJC11	Q5U458	DJC11	Dnajc11	x			x
DLDH	O08749	DLDH	Dld	x			x
DLGP1	Q9D415	DLGP1	Dlgap1	x			x
DMXL2	Q8BPN8	DMXL2	Dmxl2	x	x		x
DNJA2	Q9QYJ0	DNJA2	Dnaja2	x			x
DNJC5	P60904	DNJC5	Dnajc5	x	x		x
DNM1L	Q8K1M6	DNM1L	Dnm1l	x			x
DPP10	Q6NXK7	DPP10	Dpp10	x			x
DPYL1	P97427	DPYL1	Crmp1	x			x
DPYL5	Q9EQF6	DPYL5	Dpysl5	x			x
DYHC1	Q9JHU4	DYHC1	Dync1h1	x			x
DYL1	P63168	DYL1	Dynll1	x			x
EAA1	P56564	EAA1	Slc1a3	x			x
EAA2	P43006	EAA2	Slc1a2	x			x
ECHA	Q8BMS1	ECHA	Hadha	x			x
ECHB	Q99JY0	ECHB	Hadhb	x			x
ECHM	Q8BH95	ECHM	Echs1	x			x
ECI1	P42125	ECI1	Eci1	x			x
EF1A1	P10126	EF1A1	Eef1a1	x			x
EF1A2	P62631	EF1A2	Eef1a2	x			x
EF2	P58252	EF2	Eef2	x			x
EFGM	Q8K0D5	EFGM	Gfm1	x			x
EFTU	Q8BFR5	EFTU	Tufm	x	x		x
ENDD1	Q8C522	ENDD1	Endod1	x			x
ENOA	P17182	ENOA	Eno1	x			x
ENPL	P08113	ENPL	Hsp90b1	x			x
ETFA	Q99LC5	ETFA	Etfa	x			x
ETFB	Q9DCW4	ETFB	Etfb	x			x
ETHE1	Q9DCM0	ETHE1	Ethe1	x			x
EXOG	Q8C163	EXOG	Exog	x			x
FABP5	Q05816	FABP5	Fabp5	x			x
FABPH	P11404	FABPH	Fabp3	x			x
FARP1	F8VPU2	FARP1	Farp1	x			x
FAS	P19096	FAS	Fasn	x	x		x
FIS1	Q9CQ92	FIS1	Fis1	x			x
FLOT1	O08917	FLOT1	Flot1	x			x
FSCN1	Q61553	FSCN1	Fscn1	x			x
FUMH	P97807	FUMH	Fh	x	x		x
G6PI	P06745	G6PI	Gpi	x			x
GABR1	Q9WV18	GABR1	Gabbr1	x			x
GABR2	Q80T41	GABR2	Gabbr2	x			x
GABT	P61922	GABT	Abat	x			x
GAL3A	Q9D172	GAL3A	Gatd3				x
GBB2	P62880	GBB2	Gnb2	x	x		x
GBB4	P29387	GBB4	Gnb4				x
GBG2	P63213	GBG2	Gng2				x
GBRA1	P62812	GBRA1	Gabra1	x			x
GDAP1	O88741	GDAP1	Gdap1	x			x
GDIA	P50396	GDIA	Gdi1	x			x
GDIB	Q61598	GDIB	Gdi2	x			x
GDIR1	Q99PT1	GDIR1	Arhgdia	x			x
GDS1	E9Q912	GDS1	Rap1gds1				x
GHC1	Q9D6M3	GHC1	Slc25a22	x			x
GHC2	Q9DB41	GHC2	Slc25a18	x			x
GLNA	P15105	GLNA	Glul	x			x
GLOD4	Q9CPV4	GLOD4	Glod4	x			x
GLPK	Q64516	GLPK	Gk	x			x
GLRX5	Q80Y14	GLRX5	Glrx5	x			x
GLSK	D3Z7P3	GLSK	Gls	x			x
GNAI1	B2RSH2	GNAI1	Gnai1	x	x		x
GNAI2	P08752	GNAI2	Gnai2	x	x		x
GNAQ	P21279	GNAQ	Gnaq	x	x		x
GNAZ	O70443	GNAZ	Gnaz	x	x		x
GNB5	P62881	GNB5	Gnb5	x			x
GPDA	P13707	GPDA	Gpd1	x	x		x
GPDM	Q64521	GPDM	Gpd2	x			x
GPM6A	P35802	GPM6A	Gpm6a	x	x		x
GRIN1	Q3UNH4	GRIN1	Gprin1	x			x
GSTM1	P10649	GSTM1	Gstm1	x			x
GSTP1	P19157	GSTP1	Gstp1	x			x
GTR3	P32037	GTR3	Slc2a3	x			x
GUAD	Q9R111	GUAD	Gda	x			x
H4	P62806	H4	H4c16	x			x
HCDH	Q61425	HCDH	Hadh	x			x
HECAM	Q640R3	HECAM	Hepacam	x			x
HIBCH	Q8QZS1	HIBCH	Hibch	x			x
HINT2	Q9D0S9	HINT2	Hint2	x			x
HMGCL	P38060	HMGCL	Hmgcl	x			x
HOME1	Q9Z2Y3	HOME1	Homer1	x			x
HS105	Q61699	HS105	Hsph1	x			x
HS12A	Q8K0U4	HS12A	Hspa12a	x	x		x
HS74L	P48722	HS74L	Hspa4l	x			x
HS90A	P07901	HS90A	Hsp90aa1	x			x
HS90B	P11499	HS90B	Hsp90ab1	x			x
HSP7C	P63017	HSP7C	Hspa8	x			x
ICAM5	Q60625	ICAM5	Icam5	x			x
IDH3A	Q9D6R2	IDH3A	Idh3a	x			x
IDHP	P54071	IDHP	Idh2	x			x
IPYR2	Q91VM9	IPYR2	Ppa2	x			x
ITPR1	P11881	ITPR1	Itpr1	x			x
IVD	Q9JHI5	IVD	Ivd	x	x		x
KAD1	Q9R0Y5	KAD1	Ak1	x			x
KAD3	Q9WTP7	KAD3	Ak3	x			x
KAD4	Q9WUR9	KAD4	Ak4	x			x
KAP3	P31324	KAP3	Prkar2b	x			x
KCC2B	P28652	KCC2B	Camk2b	x			x
KCC2G	Q923T9	KCC2G	Camk2g	x			x
KINH	Q61768	KINH	Kif5b	x			x
KPCG	P63318	KPCG	Prkcg	x			x
KPYM	P52480	KPYM	Pkm	x			x
LASP1	Q61792	LASP1	Lasp1	x			x
LETM1	Q9Z2I0	LETM1	Letm1	x	x		x
LONM	Q8CGK3	LONM	Lonp1	x			x
LPPRC	Q6PB66	LPPRC	Lrpprc	x			x
M2OM	Q9CR62	M2OM	Slc25a11	x	x		x
MACD1	Q922B1	MACD1	Macrod1				x
MAG	P20917	MAG	Mag	x			x
MAOM	Q99KE1	MAOM	Me2	x			x
MAON	Q8BMF3	MAON	Me3	x			x
MAP1B	P14873	MAP1B	Map1b	x			x
MAP4	P27546	MAP4	Map4	x			x
MAP6	Q7TSJ2	MAP6	Map6	x			x
MARCS	P26645	MARCS	Marcks	x			x
MARE3	Q6PER3	MARE3	Mapre3	x			x
MCCA	Q99MR8	MCCA	Mccc1	x			x
MCCB	Q3ULD5	MCCB	Mccc2	x			x
MCU	Q3UMR5	MCU	Mcu	x			x
MDHC	P14152	MDHC	Mdh1	x			x
MDHM	P08249	MDHM	Mdh2	x			x
MFN2	Q80U63	MFN2	Mfn2	x			x
MIC19	Q9CRB9	MIC19	Chchd3	x			x
MIC26	Q9DCZ4	MIC26	Apoo	x			x
MIC60	Q8CAQ8	MIC60	Immt	x			x
MICU3	Q9CTY5	MICU3	Micu3	x			x
MIRO1	Q8BG51	MIRO1	Rhot1	x			x
MITOS	Q9CXJ4	MITOS	Abcb8				x
MMSA	Q9EQ20	MMSA	Aldh6a1	x			x
MP2K1	P31938	MP2K1	Map2k1	x			x
MPC1	P63030	MPC1	Mpc1	x			x
MPP2	Q9WV34	MPP2	Mpp2	x	x		x
MTCH1	Q791T5	MTCH1	Mtch1	x			x
MTCH2	Q791V5	MTCH2	Mtch2	x			x
MTX2	O88441	MTX2	Mtx2	x			x
MUTA	P16332	MUTA	Mmut	x			x
MYPR	P60202	MYPR	Plp1	x			x
NAC2	Q8K596	NAC2	Slc8a2	x			x
NB5R3	Q9DCN2	NB5R3	Cyb5r3	x			x
NCAM2	O35136	NCAM2	Ncam2	x			x
NCDN	Q9Z0E0	NCDN	Ncdn	x			x
NDKA	P15532	NDKA	Nme1	x	x		x
NDRG2	Q9QYG0	NDRG2	Ndrg2	x			x
NDUA2	Q9CQ75	NDUA2	Ndufa2	x			x
NDUA4	Q62425	NDUA4	Ndufa4	x			x
NDUA5	Q9CPP6	NDUA5	Ndufa5	x			x
NDUA6	Q9CQZ5	NDUA6	Ndufa6	x			x
NDUA7	Q9Z1P6	NDUA7	Ndufa7	x			x
NDUA8	Q9DCJ5	NDUA8	Ndufa8	x			x
NDUAA	Q99LC3	NDUAA	Ndufa10	x			x
NDUAC	Q7TMF3	NDUAC	Ndufa12	x			x
NDUAD	Q9ERS2	NDUAD	Ndufa13	x			x
NDUB4	Q9CQC7	NDUB4	Ndufb4	x			x
NDUB7	Q9CR61	NDUB7	Ndufb7	x			x
NDUB8	Q9D6J5	NDUB8	Ndufb8	x			x
NDUB9	Q9CQJ8	NDUB9	Ndufb9	x			x
NDUBA	Q9DCS9	NDUBA	Ndufb10	x			x
NDUC2	Q9CQ54	NDUC2	Ndufc2	x			x
NDUS1	Q91VD9	NDUS1	Ndufs1	x	x		x
NDUS2	Q91WD5	NDUS2	Ndufs2	x			x
NDUS6	P52503	NDUS6	Ndufs6	x			x
NDUS7	Q9DC70	NDUS7	Ndufs7	x			x
NDUV2	Q9D6J6	NDUV2	Ndufv2	x			x
NECP1	Q9CR95	NECP1	Necap1	x			x
NEUM	P06837	NEUM	Gap43	x			x
NFASC	Q810U3	NFASC	Nfasc	x	x		x
NFH	P19246	NFH	Nefh				x
NFS1	Q9Z1J3	NFS1	Nfs1	x			x
NIPS1	O55125	NIPS1	Nipsnap1	x			x
NPTN	P97300	NPTN	Nptn	x			x
NPTX1	Q62443	NPTX1	Nptx1	x			x
NSF	P46460	NSF	Nsf	x	x		x
NT5D3	Q3UHB1	NT5D3	Nt5dc3	x			x
NU5M	P03921	NU5M	Mtnd5	x			x
OCAD2	Q9D8W7	OCAD2	Ociad2	x			x
ODB2	P53395	ODB2	Dbt	x			x
ODO1	Q60597	ODO1	Ogdh	x	x		x
ODO2	Q9D2G2	ODO2	Dlst	x			x
ODP2	Q8BMF4	ODP2	Dlat	x			x
ODPA	P35486	ODPA	Pdha1	x			x
ODPB	Q9D051	ODPB	Pdhb	x			x
ODPX	Q8BKZ9	ODPX	Pdhx	x	x		x
OPA1	P58281	OPA1	Opa1	x	x		x
P5CS	Q9Z110	P5CS	Aldh18a1	x			x
PACN1	Q61644	PACN1	Pacsin1	x			x
PALM	Q9Z0P4	PALM	Palm	x			x
PALS2	Q9JLB0	PALS2	Pals2				x
PCCA	Q91ZA3	PCCA	Pcca	x	x		x
PCCB	Q99MN9	PCCB	Pccb	x			x
PCLO	Q9QYX7	PCLO	Pclo	x			x
PCS1N	Q9QXV0	PCS1N	Pcsk1n				x
PDIA3	P27773	PDIA3	Pdia3	x			x
PDK1	Q8BFP9	PDK1	Pdk1	x			x
PEA15	Q62048	PEA15	Pea15	x			x
PEBP1	P70296	PEBP1	Pebp1	x			x
PFKAL	P12382	PFKAL	Pfkl	x			x
PFKAM	P47857	PFKAM	Pfkm	x			x
PGAM1	Q9DBJ1	PGAM1	Pgam1	x			x
PGK1	P09411	PGK1	Pgk1	x			x
PHB1	P67778	PHB1	Phb1				x
PHB2	O35129	PHB2	Phb2	x			x
PHF24	Q80TL4	PHF24	Phf24	x			x
PI4KA	E9Q3L2	PI4KA	Pi4ka	x			x
PLCB1	Q9Z1B3	PLCB1	Plcb1	x	x		x
PLEC	Q9QXS1	PLEC	Plec	x			x
PLPP3	Q99JY8	PLPP3	Plpp3	x			x
PP1A	P62137	PP1A	Ppp1ca	x			x
PP2BA	P63328	PP2BA	Ppp3ca	x	x		x
PPIB	P24369	PPIB	Ppib	x			x
PRDX1	P35700	PRDX1	Prdx1	x			x
PRDX2	Q61171	PRDX2	Prdx2	x			x
PRDX3	P20108	PRDX3	Prdx3	x			x
PRDX5	P99029	PRDX5	Prdx5	x			x
PROD	Q9WU79	PROD	Prodh	x			x
PROF1	P62962	PROF1	Pfn1	x			x
PROF2	Q9JJV2	PROF2	Pfn2	x			x
PRRT2	E9PUL5	PRRT2	Prrt2	x			x
PSA	Q11011	PSA	Npepps	x			x
PSA5	Q9Z2U1	PSA5	Psma5	x			x
PTGR3	Q8BGC4	PTGR3	Ptgr3	x			x
PTPR2	P80560	PTPR2	Ptprn2	x			x
PYGB	Q8CI94	PYGB	Pygb	x	x		x
PYGM	Q9WUB3	PYGM	Pygm	x			x
QCR1	Q9CZ13	QCR1	Uqcrc1	x			x
QCR2	Q9DB77	QCR2	Uqcrc2	x			x
QCR8	Q9CQ69	QCR8	Uqcrq	x			x
RAB10	P61027	RAB10	Rab10	x			x
RAB14	Q91V41	RAB14	Rab14	x			x
RAB21	P35282	RAB21	Rab21	x			x
RAB2A	P53994	RAB2A	Rab2a	x			x
RAB35	Q6PHN9	RAB35	Rab35	x			x
RAB3A	P63011	RAB3A	Rab3a	x			x
RAB3C	P62823	RAB3C	Rab3c	x			x
RAB5C	P35278	RAB5C	Rab5c	x			x
RAB7A	P51150	RAB7A	Rab7a	x	x		x
RAB8B	P61028	RAB8B	Rab8b				x
RALA	P63321	RALA	Rala	x			x
RDH14	Q9ERI6	RDH14	Rdh14	x			x
RHOB	P62746	RHOB	Rhob	x			x
RIDA	P52760	RIDA	Rida				x
RL12	P35979	RL12	Rpl12	x			x
RL3	P27659	RL3	Rpl3	x			x
RL8	P62918	RL8	Rpl8	x			x
RP3A	P47708	RP3A	Rph3a	x			x
RPGF4	Q9EQZ6	RPGF4	Rapgef4	x			x
RPN1	Q91YQ5	RPN1	Rpn1	x			x
RTN1	Q8K0T0	RTN1	Rtn1	x			x
RTN4	Q99P72	RTN4	Rtn4	x			x
S2512	Q8BH59	S2512	Slc25a12				x
S4A10	Q5DTL9	S4A10	Slc4a10	x			x
S6A11	P31650	S6A11	Slc6a11	x			x
SAHH2	Q80SW1	SAHH2	Ahcyl1	x	x		x
SAM50	Q8BGH2	SAM50	Samm50	x			x
SATT	O35874	SATT	Slc1a4	x	x		x
SC6A1	P31648	SC6A1	Slc6a1	x	x		x
SCAI	Q8C8N2	SCAI	Scai	x			x
SCAM1	Q8K021	SCAM1	Scamp1	x	x		x
SCAM5	Q9JKD3	SCAM5	Scamp5	x			x
SCMC2	A2ASZ8	SCMC2	Slc25a25	x			x
SCMC3	Q6GQS1	SCMC3	Slc25a23	x			x
SCOT1	Q9D0K2	SCOT1	Oxct1	x			x
SCP2	P32020	SCP2	Scp2				x
SCPDL	Q8R127	SCPDL	Sccpdh	x			x
SCRN1	Q9CZC8	SCRN1	Scrn1	x			x
SDHA	Q8K2B3	SDHA	Sdha	x			x
SDHB	Q9CQA3	SDHB	Sdhb	x	x		x
SERA	Q61753	SERA	Phgdh	x			x
SERC	Q99K85	SERC	Psat1	x			x
SFXN1	Q99JR1	SFXN1	Sfxn1	x	x		x
SFXN3	Q91V61	SFXN3	Sfxn3	x	x		x
SFXN5	Q925N0	SFXN5	Sfxn5	x			x
SHAN1	D3YZU1	SHAN1	Shank1	x			x
SHAN3	Q4ACU6	SHAN3	Shank3	x			x
SHPS1	P97797	SHPS1	Sirpa	x			x
SHSA7	Q8C3Q5	SHSA7	Shisa7	x			x
SNAA	Q9DB05	SNAA	Napa	x			x
SNAB	P28663	SNAB	Napb	x			x
SNG1	O55100	SNG1	Syngr1	x			x
SNG3	Q8R191	SNG3	Syngr3	x			x
SNPH	Q80U23	SNPH	Snph	x			x
SODC	P08228	SODC	Sod1	x			x
SODM	P09671	SODM	Sod2	x			x
SPTB2	Q62261	SPTB1	Sptbn1	x			x
SSDH	Q8BWF0	SSDH	Aldh5a1	x	x		x
STML2	Q99JB2	STML2	Stoml2	x			x
STMN1	P54227	STMN1	Stmn1	x			x
STX1A	O35526	STX1A	Stx1a	x			x
SUCA	Q9WUM5	SUCA	Suclg1	x			x
SUCB1	Q9Z2I9	SUCB1	Sucla2	x			x
SUCB2	Q9Z2I8	SUCB2	Suclg2	x			x
SV2A	Q9JIS5	SV2A	Sv2a	x			x
SV2B	Q8BG39	SV2B	Sv2b	x			x
SYIM	Q8BIJ6	SYIM	Iars2	x	x		x
SYN1	O88935	SYN1	Syn1	x			x
SYN2	Q64332	SYN2	Syn2	x			x
SYNPO	Q8CC35	SYNPO	Synpo	x			x
SYPH	Q62277	SYPH	Syp	x			x
SYT1	P46096	SYT1	Syt1	x			x
SYUA	O55042	SYUA	Snca	x			x
SYUB	Q91ZZ3	SYUB	Sncb	x			x
TAGL3	Q9R1Q8	TAGL3	Tagln3	x			x
TCPA	P11983	TCPA	Tcp1	x			x
TCPB	P80314	TCPB	Cct2	x			x
TCPE	P80316	TCPE	Cct5	x			x
TCPG	P80318	TCPG	Cct3	x			x
TCPH	P80313	TCPH	Cct7	x			x
TCPQ	P42932	TCPQ	Cct8	x			x
TENR	Q8BYI9	TENR	Tnr	x			x
TERA	Q01853	TERA	Vcp	x	x		x
THIL	Q8QZT1	THIL	Acat1	x			x
THIM	Q8BWT1	THIM	Acaa2	x			x
THIO	P10639	THIO	Txn	x			x
THTM	Q99J99	THTM	Mpst	x			x
THTR	P52196	THTR	Tst	x			x
TIM44	O35857	TIM44	Timm44	x			x
TIM50	Q9D880	TIM50	Timm50	x			x
TIM9	Q9WV98	TIM9	Timm9	x			x
TKT	P40142	TKT	Tkt	x			x
TMM65	Q4VAE3	TMM65	Tmem65	x			x
TMOD2	Q9JKK7	TMOD2	Tmod2	x			x
TOM22	Q9CPQ3	TOM22	Tomm22	x			x
TOM70	Q9CZW5	TOM70	Tomm70	x			x
TPPP3	Q9CRB6	TPPP3	Tppp3	x			x
TRAP1	Q9CQN1	TRAP1	Trap1	x			x
TXTP	Q8JZU2	TXTP	Slc25a1	x			x
UBA1	Q02053	UBA1	Uba1	x	x		x
UBE2N	P61089	UBE2N	Ube2n	x			x
UCRI	Q9CR68	UCRI	Uqcrfs1	x	x		x
VA0D1	P51863	VA0D1	Atp6v0d1	x	x		x
VAT1	Q62465	VAT1	Vat1	x			x
VATA	P50516	VATA	Atp6v1a	x			x
VATB2	P62814	VATB2	Atp6v1b2	x			x
VATC1	Q9Z1G3	VATC1	Atp6v1c1	x			x
VATD	P57746	VATD	Atp6v1d	x			x
VATG2	Q9WTT4	VATG2	Atp6v1g2	x			x
VIAAT	O35633	VIAAT	Slc32a1	x			x
VIME	P20152	VIME	Vim	x			x
VISL1	P62761	VISL1	Vsnl1	x	x		x
VPS35	Q9EQH3	VPS35	Vps35	x	x		x
WDR1	O88342	WDR1	Wdr1	x			x
WDR7	Q920I9	WDR7	Wdr7	x			x
A0A087WP70	A0A087WP70	LSAMP	Lsamp	x		x
A0A0A0MQA5	A0A0A0MQA5	TBA4A	Tuba4a	x		x
A0A0G2JGX4	A0A0G2JGX4	AT1A3	Atp1a3	x	x	x
A0A1L1SUX8	A0A1L1SUX8	THY1	Thy1	x	x	x
A0A2R8VK70	A0A2R8VK70	CD47	Cd47	x	x	x
A3KGU7	A3KGU7	SPTN1	Sptan1	x		x
B0QZN5	B0QZN5	VAMP2	Vamp2	x		x
Q5SXR6	Q5SXR6	CLH1	Cltc	x	x	x
Q68FG2	Q68FG2	SPTB2	Sptbn2	x		x
S4R1W8	S4R1W8	G3P	Gapdh	x		x
A0A0A0MQ68	A0A0A0MQ68	GCDH	Gcdh	x
A0A0A0MQM0	A0A0A0MQM0	IF5A1	Eif5a	x
A0A0A6YW67	A0A0A6YW67	A0A0A6YW67	Gm8797
A0A0A6YWF5	A0A0A6YWF5	S38A3	Slc38a3	x
A0A0A6YX18	A0A0A6YX18	VATH	Atp6v1h	x
A0A0A6YX73	A0A0A6YX73	KAP2	Prkar2a	x
A0A0A6YXF6	A0A0A6YXF6	RHOA	Rhoa	x
A0A0G2JEG8	A0A0G2JEG8	AMPH	Amph	x
A0A0G2JFB2	A0A0G2JFB2	TDRKH	Tdrkh	x
A0A0G2JGB7	A0A0G2JGB7	LGI1	Lgi1	x	x
A0A0G2JGJ1	A0A0G2JGJ1	DHPR	Qdpr	x
A0A0G2JGQ6	A0A0G2JGQ6	DCLK1	Dclk1	x	x
A0A0G2JGY9	A0A0G2JGY9	PLPR4	Plppr4	x
A0A0J9YTY0	A0A0J9YTY0	SEPT11	Septin11	x
A0A0J9YU26	A0A0J9YU26	S12A5	Slc12a5	x
A0A0J9YU62	A0A0J9YU62	CTBP1	Ctbp1	x
A0A0M3HEP7	A0A0M3HEP7	AT8A1	Atp8a1	x
A0A0N4SVT3	A0A0N4SVT3	GBG12	Gng12	x
A0A0R3P9C8	A0A0R3P9C8	NDUA9	Ndufa9	x
A0A0R4J023	A0A0R4J023	AUHM	Auh	x
A0A0R4J036	A0A0R4J036	NFM	Nefm	x
A0A0R4J083	A0A0R4J083	ACADL	Acadl	x
A0A0R4J094	A0A0R4J094	FAHD2	Fahd2a	x
A0A0R4J0I9	A0A0R4J0I9	LRP1	Lrp1	x
A0A0R4J0P1	A0A0R4J0P1	ACAD8	Acad8	x
A0A0R4J2C2	A0A0R4J2C2	SYT2	Syt2	x	x
A0A140LHL5	A0A140LHL5	SIR2	Sirt2	x
A0A1B0GQU8	A0A1B0GQU8	RL18	Rpl18	x
A0A1B0GRV0	A0A1B0GRV0	BPNT1	Bpnt1	x
A0A1B0GSX0	A0A1B0GSX0	LDHA	Ldha	x
A0A1D5RLS1	A0A1D5RLS1	EP15R	Eps15l1	x	x
A0A1D5RM83	A0A1D5RM83	IQEC1	Iqsec1	x
A0A1W2P6F6	A0A1W2P6F6	MYL6	Myl6	x
A0A338P6E5	A0A338P6E5	DLG4	Dlg4	x
A0A338P6J0	A0A338P6J0	DLG2	Dlg2	x
A0A338P799	A0A338P799	SYGP1	Syngap1	x
A0A494BAI5	A0A494BAI5	HEMH	Fech	x
A0A498WGS3	A0A498WGS3	MBP	Mbp	x
A0A4W9	A0A4W9	NEGR1	Negr1	x
A0A571BDG6	A0A571BDG6	SRCN1	Srcin1	x
A0A571BES1	A0A571BES1	AP3B2	Ap3b2	x
A0A5H1ZRM8	A0A5H1ZRM8	SCN2A	Scn2a
A0A668KLC6	A0A668KLC6	MTAP2	Map2	x
A0A6I8MX27	A0A6I8MX27	LDHB	Ldhb	x	x
A0JNY3	A0JNY3	GEPH	Gphn	x
A1BN54	A1BN54	ACTN1	Actn1	x	x
A2A6U3	A2A6U3	SEPT9	Septin9	x
A2AEG6	A2AEG6	GPM6B	Gpm6b	x
A2AFG8	A2AFG8	L1CAM	L1cam	x
A2AFQ2	A2AFQ2	HCD2	Hsd17b10	x
A2AI14	A2AI14	NMDZ1	Grin1	x
A2AKU9	A2AKU9	ATPG	Atp5c1	x	x
A2AMQ5	A2AMQ5	CDS2	Cds2	x
A2ARP8	A2ARP8	MAP1A	Map1a	x
A2AS98	A2AS98	NCKP1	Nckap1	x	x
A2AUK5	A2AUK5	E41L1	Epb41l1	x
A2AWI7	A2AWI7	SHLB2	Sh3glb2	x
A2CEK3	A2CEK3	PGM1	Pgm1	x	x
A3KGE4	A3KGE4	NOE1	Olfm1	x
A9DA50	A9DA50	LIGO1	Lingo1	x
ACTG	P63260	ACTG	Actg1	x
ATAD3	Q925I1	ATAD3	Atad3	x	x
B1AQW2	B1AQW2	TAU	Mapt	x
B1ARU4	B1ARU4	MACF1	Macf1	x
B1ARW4	B1ARW4	NDUS5	Ndufs5	x
B1ATI0	B1ATI0	AL3A2	Aldh3a2	x
B1AU25	B1AU25	AIFM1	Aifm1	x	x
B1AZ46	B1AZ46	BAIP2	Baiap2	x	x
B2RRE2	B2RRE2	MY18A	Myo18a	x
B2RXS8	B2RXS8	PTPRZ	Ptprz1
B2RXT3	B2RXT3	B2RXT3	Ogdhl
B7ZC46	B7ZC46	SEPT8	Septin8	x	x
B7ZNF6	B7ZNF6	CTND2	Ctnnd2	x
D3YTU0	D3YTU0	VAMP1	Vamp1	x	x
D3YUM1	D3YUM1	NDUV1	Ndufv1	x
D3YUP9	D3YUP9	ADA22	Adam22	x
D3YWF6	D3YWF6	OTUB1	Otub1	x
D3YYB1	D3YYB1	SEPT2	Septin2	x
D3YYT0	D3YYT0	CADH2	Cdh2	x
D3Z360	D3Z360	DPYL4	Dpysl4	x
D3Z396	D3Z396	NTRI	Ntm	x	x
D3Z4B2	D3Z4B2	SNAG	Napg	x
D3Z568	D3Z568	NDUB5	Ndufb5	x
D3Z5K8	D3Z5K8	SHAN2	Shank2	x
D3Z656	D3Z656	SYNJ1	Synj1	x	x
DHRS1	Q99L04	DHRS1	Dhrs1	x
E0CY11	E0CY11	NRX1A	Nrxn1	x
E0CYV0	E0CYV0	PIMT	Pcmt1	x
E0CZ72	E0CZ72	KIF2A	Kif2a	x
E9PV44	E9PV44	ATIF1	Atpif1	x
E9PWX1	E9PWX1	DPP6	Dpp6	x	x
E9PYH2	E9PYH2	BACH	Acot7	x
E9Q030	E9Q030	ABLM1	Ablim1	x
E9Q1G8	E9Q1G8	SEPT7	Septin7	x
E9Q1X8	E9Q1X8	CA2D1	Cacna2d1	x	x
E9Q4M4	E9Q4M4	MIC25	Chchd6	x
E9Q8N8	E9Q8N8	S4A4	Slc4a4	x
E9Q9H0	E9Q9H0	DLG1	Dlg1	x
E9QB01	E9QB01	NCAM1	Ncam1	x
E9QLL2	E9QLL2	DYN3	Dnm3	x
E9QNF7	E9QNF7	CNTP2	Cntnap2	x
E9QPX3	E9QPX3	NDUS4	Ndufs4	x
F6RJV6	F6RJV6	LANC2	Lancl2	x
F6Z2S4	F6Z2S4	MYO5A	Myo5a	x
F6ZFT1	F6ZFT1	ACPM	Ndufab1	x
F7BNZ5	F7BNZ5	BCAS1	Bcas1	x
F8WGT1	F8WGT1	SAHH3	Ahcyl2	x
G3UVV4	G3UVV4	HXK1	Hk1	x	x
G3UX26	G3UX26	VDAC2	Vdac2	x	x
G3UYZ1	G3UYZ1	IGSF8	Igsf8	x
G3UZM4	G3UZM4	CADM2	Cadm2	x	x
G3X8R0	G3X8R0	REEP5	Reep5	x
G3XA53	G3XA53	OMGP	Omg	x
G5E814	G5E814	NDUAB	Ndufa11	x
G5E839	G5E839	TCPD	Cct4	x
G5E8R0	G5E8R0	TPM1	Tpm1	x
G5E8R3	G5E8R3	PYC	Pcx	x
GNAS2	P63094	GNAS2	Gnas
GRP75	P38647	GRP75	Hspa9	x
H2B1C	Q6ZWY9	H2B1C	H2bc8
H7BWZ3	H7BWZ3	ARPC3	Arpc3	x
I3ITR1	I3ITR1	I3ITR1	AK157302
IDHG1	P70404	IDHG1	Idh3g	x
ISC2A	P85094	ISC2A	Isoc2a	x
J3QMG3	J3QMG3	VDAC3	Vdac3	x
J3QMM7	J3QMM7	NNRD	Naxd	x
K3W4T3	K3W4T3	VPP1	Atp6v0a1	x
K4DI58	K4DI58	CADM3	Cadm3	x
MAL2	Q8BI08	MAL2	Mal2	x
MARC2	Q922Q1	MARC2	Mtarc2	x
NAKD2	Q8C5H8	NAKD2	Nadk2	x
P5CR2	Q922Q4	P5CR2	Pycr2	x
Q0VF59	Q0VF59	DLGP2	Dlgap2	x
Q3TWV4	Q3TWV4	AP2M1	Ap2m1	x	x
Q3U125	Q3U125	PXL2A	Prxl2a
Q3U2G2	Q3U2G2	HSP74	Hspa4	x	x
Q3U4W8	Q3U4W8	UBP5	Usp5	x
Q3UHT7	Q3UHT7	ERC2	Erc2	x
Q3USC7	Q3USC7	GD1L1	Gdap1l1	x
Q3UY21	Q3UY21	MOG	Mog	x
Q3UYN2	Q3UYN2	CPNE6	Cpne6	x
Q3V117	Q3V117	ACLY	Acly	x
Q52KG9	Q52KG9	TCPZ	Cct6a	x
Q5SS83	Q5SS83	FLOT2	Flot2	x
Q5SV64	Q5SV64	MYH10	Myh10	x
Q6GT24	Q6GT24	PRDX6	Prdx6	x	x
Q6PF96	Q6PF96	ETFD	Etfdh	x
Q7TMG8	Q7TMG8	NIPS2	Nipsnap2	x
Q80UE4	Q80UE4	E41L2	Epb41l2	x
Q8BH80	Q8BH80	VAPB	Vapb	x
Q8C605	Q8C605	PFKAP	Pfkp	x
Q8K356	Q8K356	LY6H	Ly6h	x
Q8R5L1	Q8R5L1	C1QBP	C1qbp	x
Q91VB8	Q91VB8	HBA	Hba-a1	x
Q91XH5	Q91XH5	SPRE	Spr	x
Q924B0	Q924B0	IMPA1	Impa1	x	x
Q9CQB4	Q9CQB4	QCR7	Uqcrb	x
RM12	Q9DB15	RM12	Mrpl12	x
S4R1C4	S4R1C4	AT2B2	Atp2b2	x
S4R2F1	S4R2F1	CCG8	Cacng8	x	x
S4R2K9	S4R2K9	ANK3	Ank3	x	x
S4R2T7	S4R2T7	ANK2	Ank2	x
SEPT3	Q9Z1S5	SEPT3	Septin3	x
SOGA3	Q6NZL0	SOGA3	Soga3	x
THEM4	Q3UUI3	THEM4	Them4	x

## Sheet: PPT1 KO-2-4-7 Consensus
PPT1 KO-2-4-7 Consensus Lipofuscin Proteome				S-Acylated Protein Annotation	Mitochondrial Subcompartment Annotation	Lysosomal Protein Annotation				Synaptic Protein Annotation		Human Protein Atlas Organelle Annotation													Human Brain Lipofuscin
UniProt Accession	SWISSPROT Accession	UniProt ID	Gene Name	Brain Palmitome (Gorenberg et al., 2022)	MitoCarta 3.0 Annotation	Known Lysosomal Proteins (Laqtom et al., 2022)	Proteins Enriched in Lyso-IP (Laqtom et al., 2022)	Lysosomal Proteins (Chapel et al., 2013)	Known Lysosomal Proteins (Akter et al., 2023)	Synaptosome Proteins (Taoufiq et al., 2020)	Synaptic Vesicle (SV) Proteins (Taoufiq et al., 2020)	Vesicles	Mitochondria	Nucleoplasm	Nuclear Membrane	Nucleoli	Cytosol	Centrosome	Microtubules	Intermediate Filaments	Actin Filaments	Golgi Apparatus	Endoplasmic Reticulum	Plasma Membrane	(This Paper)
Q9CQV8	1433B	1433B	Ywhab	x				x			x						x								x
P62259	1433E	1433E	Ywhae	x				x			x						x								x
P68510	1433F	1433F	Ywhah	x							x														x
P61982	1433G	1433G	Ywhag	x							x						x								x
P68254	1433T	1433T	Ywhaq	x							x			x			x								x
P63101	1433Z	1433Z	Ywhaz	x							x														x
Q76MZ3	2AAA	2AAA	Ppp2r1a	x				x			x						x								x
Q99L13	3HIDH	3HIDH	Hibadh	x	Matrix					x															x
P10852	4F2	4F2	Slc3a2	x				x	x		x			x										x	x
Q3UHJ0	AAK1	AAK1	Aak1	x							x	x					x							x	x
P05201	AATC	AATC	Got1	x		x		x	x		x														x
P05202	AATM	AATM	Got2	x	MIM						x														x
Q61102	ABCB7	ABCB7	Abcb7	x	MIM					x			x												x
Q6PE15	ABHDA	ABHDA	Abhd10	x	Matrix					x			x												x
E9Q030	E9Q030	ABLM1	Ablim1	x							x						x								x
E9Q0W6	E9Q0W6	ABLM2	Ablim2	x						x			x	x											x
A0A0R4J0P1	A0A0R4J0P1	ACAD8	Acad8	x	Matrix					x															x
Q8JZN5	ACAD9	ACAD9	Acad9	x	MIM					x			x												x
P45952	ACADM	ACADM	Acadm	x	Matrix					x			x												x
Q07417	ACADS	ACADS	Acads	x	Matrix					x			x												x
P50544	ACADV	ACADV	Acadvl	x	MIM					x			x	x		x									x
Q99PU5	ACBG1	ACBG1	Acsbg1	x							x	x													x
Q9DBL1	ACDSB	ACDSB	Acadsb	x	Matrix					x			x												x
Q91V92	ACLY	ACLY	Acly	x	Matrix		x	x	x		x			x			x								x
Q9CQR4	ACO13	ACO13	Acot13	x	Matrix					x														x	x
Q99KI0	ACON	ACON	Aco2	x	Matrix					x			x												x
Q9R0X4	ACOT9	ACOT9	Acot9	x	MIM					x				x			x							x	x
F6ZFT1	F6ZFT1	ACPM	Ndufab1	x	MIM					x			x	x											x
Q8VCW8	ACSF2	ACSF2	Acsf2	x	Matrix					x				x			x		x						x
Q5ICG5	Q5ICG5	ACSL6	Acsl6	x	MOM						x														x
A1BN54	A1BN54	ACTN1	Actn1	x			x			x							x				x			x	x
A0A494BB86	A0A494BB86	ACTZ	Actr1a	x							x								x						x
D3YUP9	D3YUP9	ADA22	Adam22	x							x													x	x
F8WGR0	F8WGR0	ADDA	Add1	x						x				x										x	x
Q9QYB8	ADDB	ADDB	Add2	x						x				x			x							x	x
Q9QYB5	ADDG	ADDG	Add3	x						x														x	x
P48962	ADT1	ADT1	Slc25a4	x	MIM						x		x												x
P51881	ADT2	ADT2	Slc25a5	x	MIM					x			x												x
Q8JZQ2	AFG32	AFG32	Afg3l2	x	MIM					x			x												x
Q9ESW4	AGK	AGK	Agk	x	MIM					x		x	x												x
B1AU25	B1AU25	AIFM1	Aifm1	x	MIM					x			x												x
P46660	AINX	AINX	Ina	x							x						x			x					x
Q9JII6	AK1A1	AK1A1	Akr1a1	x				x		x				x			x								x
Q9CZS1	AL1B1	AL1B1	Aldh1b1	x	Matrix					x			x												x
Q8R0Y6	AL1L1	AL1L1	Aldh1l1	x	Matrix		x			x							x								x
B1ATI0	B1ATI0	AL3A2	Aldh3a2	x	Membrane		x				x						x						x		x
Q8CHT0	AL4A1	AL4A1	Aldh4a1	x	Matrix					x			x												x
Q9DBF1	AL7A1	AL7A1	Aldh7a1	x	Matrix		x			x			x				x								x
Q9JLJ2	AL9A1	AL9A1	Aldh9a1	x	Matrix					x							x								x
A0A0G2JEU1	A0A0G2JEU1	ALDH2	Aldh2	x	Matrix						x														x
P05064	ALDOA	ALDOA	Aldoa	x				x			x						x								x
P05063	ALDOC	ALDOC	Aldoc	x							x	x		x		x	x								x
P45376	ALDR	ALDR	Akr1b1	x				x	x	x				x			x								x
A0A0G2JEG8	A0A0G2JEG8	AMPH	Amph	x							x						x							x	x
Q9CPY7	AMPL	AMPL	Lap3	x	Matrix		x			x				x			x		x						x
S4R2F3	S4R2F3	ANK2	Ank2	x					x		x													x	x
S4R2K9	S4R2K9	ANK3	Ank3	x		x			x		x													x	x
P48036	ANXA5	ANXA5	Anxa5	x				x			x				x										x
F8WIT2	F8WIT2	ANXA6	Anxa6	x		x			x		x						x								x
Q64133	AOFA	AOFA	Maoa	x	MOM						x		x				x								x
Q8BW75	AOFB	AOFB	Maob	x	MOM		x				x														x
Q61548	AP180	AP180	Snap91	x							x						x	x							x
O35643	AP1B1	AP1B1	Ap1b1	x				x	x		x	x					x					x			x
P17426	AP2A1	AP2A1	Ap2a1	x				x	x		x	x													x
P17427	AP2A2	AP2A2	Ap2a2	x				x	x		x	x		x											x
Q9DBG3	AP2B1	AP2B1	Ap2b1	x				x	x		x	x													x
Q3TWV4	Q3TWV4	AP2M1	Ap2m1	x				x	x		x													x	x
A0A571BES1	A0A571BES1	AP3B2	Ap3b2	x					x		x			x			x					x			x
O54774	AP3D1	AP3D1	Ap3d1	x		x		x	x		x						x								x
Q9R0Q6	ARC1A	ARC1A	Arpc1a	x							x						x							x	x
P61205	ARF3	ARF3	Arf3				x				x														x
P61750	ARF4	ARF4	Arf4	x			x				x														x
P61161	ARP2	ARP2	Actr2	x			x	x	x		x						x								x
Q99JY9	ARP3	ARP3	Actr3	x							x														x
Q9D898	ARP5L	ARP5L	Arpc5l	x							x														x
D3YXG6	D3YXG6	ARPC2	Arpc2	x				x			x			x											x
H7BWZ3	H7BWZ3	ARPC3	Arpc3	x							x			x											x
P59999	ARPC4	ARPC4	Arpc4	x							x														x
Q3UA72	Q3UA72	ARPC5	Arpc5	x				x			x	x					x							x	x
Q9WV54	ASAH1	ASAH1	Asah1	x		x	x	x	x	x															x
Q8C0M9	ASGL1	ASGL1	Asrgl1	x						x				x					x						x
Q8VDN2	AT1A1	AT1A1	Atp1a1	x							x														x
Q6PIE5	AT1A2	AT1A2	Atp1a2	x			x				x														x
A0A0G2JGX4	A0A0G2JGX4	AT1A3	Atp1a3	x			x				x														x
P14094	AT1B1	AT1B1	Atp1b1	x							x														x
P14231	AT1B2	AT1B2	Atp1b2	x							x														x
O55143	AT2A2	AT2A2	Atp2a2	x							x														x
G5E829	AT2B1	AT2B1	Atp2b1	x				x			x													x	x
S4R1C4	S4R1C4	AT2B2	Atp2b2	x							x														x
E9Q828	E9Q828	AT2B4	Atp2b4	x							x													x	x
Q9CQQ7	AT5F1	AT5F1	Atp5pb	x	MIM								x												x
A0A0M3HEP7	A0A0M3HEP7	AT8A1	Atp8a1	x			x	x	x		x	x					x								x
E9PV44	E9PV44	ATIF1	Atpif1	x	Matrix					x															x
Q8BH66	ATLA1	ATLA1	Atl1	x							x														x
P56382	ATP5E	ATP5E	Atp5f1e	x																					x
Q9DCX2	ATP5H	ATP5H	Atp5pd	x	MIM					x															x
Q06185	ATP5I	ATP5I	Atp5me	x									x												x
P97450	ATP5J	ATP5J	Atp5pf										x												x
P03930	ATP8	ATP8	Mtatp8																						x
Q03265	ATPA	ATPA	Atp5f1a	x									x												x
P56480	ATPB	ATPB	Atp5f1b	x									x												x
Q9D3D9	ATPD	ATPD	Atp5f1d	x																					x
Q8C2Q8	Q8C2Q8	ATPG	Atp5c1	x	MIM					x															x
P56135	ATPK	ATPK	Atp5mf	x									x		x										x
Q78IK2	ATPMK	ATPMK	Atp5mk										x												x
Q9DB20	ATPO	ATPO	Atp5po	x									x												x
A0A0R4J023	A0A0R4J023	AUHM	Auh	x	Matrix					x															x
Q80TZ3	AUXI	AUXI	Dnajc6	x							x			x			x							x	x
E9PYH2	E9PYH2	BACH	Acot7	x	Matrix					x				x			x								x
B1AZ46	B1AZ46	BAIP2	Baiap2	x							x						x							x	x
P18572	BASI	BASI	Bsg	x							x	x													x
Q91XV3	BASP1	BASP1	Basp1	x			x				x													x	x
F7BNZ5	F7BNZ5	BCAS1	Bcas1	x							x	x													x
Q9CZP5	BCS1	BCS1	Bcs1l	x	MIM					x															x
Q80XN0	BDH	BDH	Bdh1	x	MIM					x			x												x
O08539	BIN1	BIN1	Bin1	x							x						x								x
P20029	BIP	BIP	Hspa5								x						x								x
Q8R164	BPHL	BPHL	Bphl	x	Matrix		x			x			x												x
A0A1B0GRV0	A0A1B0GRV0	BPNT1	Bpnt1	x						x				x											x
O88737	BSN	BSN	Bsn	x							x														x
P14106	C1QB	C1QB	C1qb					x																	x
Q8R5L1	Q8R5L1	C1QBP	C1qbp	x	Matrix					x			x											x	x
A0A1W2P733	A0A1W2P733	C1TC	Mthfd1	x							x						x								x
Q3V3R1	C1TM	C1TM	Mthfd1l	x	Matrix					x			x												x
E9Q1X8	E9Q1X8	CA2D1	Cacna2d1	x							x														x
Q9WTR5	CAD13	CAD13	Cdh13	x							x													x	x
D3YYT0	D3YYT0	CADH2	Cdh2	x			x			x														x	x
A0A668KLV1	A0A668KLV1	CADM1	Cadm1	x			x				x													x	x
Q8BLQ9	CADM2	CADM2	Cadm2	x							x														x
K4DI58	K4DI58	CADM3	Cadm3	x							x														x
Q8R464	CADM4	CADM4	Cadm4	x							x			x	x										x
P00920	CAH2	CAH2	Ca2	x				x			x														x
Q08331	CALB2	CALB2	Calb2	x							x						x								x
P0DP26	CALM1	CALM1	Calm1	x							x						x								x
P14211	CALR	CALR	Calr	x		x					x												x		x
P35564	CALX	CALX	Canx	x							x												x		x
A0A0A6YW88	A0A0A6YW88	CAMKV	Camkv	x							x			x					x						x
O08529	CAN2	CAN2	Capn2	x		x			x	x							x								x
Q63810	CANB1	CANB1	Ppp3r1	x							x						x							x	x
Q6ZQ38	CAND1	CAND1	Cand1	x						x				x			x					x			x
P40124	CAP1	CAP1	Cap1	x				x	x	x							x								x
Q80TJ1	CAPS1	CAPS1	Cadps	x							x	x													x
P47757	CAPZB	CAPZB	Capzb	x				x			x	x		x			x								x
P10605	CATB	CATB	Ctsb	x		x	x	x	x	x		x				x									x
F8WIR1	F8WIR1	CATD	Ctsd	x		x	x		x		x														x
P47754	CAZA2	CAZA2	Capza2	x				x			x						x								x
Q00493	CBPE	CBPE	Cpe	x			x				x	x						x							x
P48758	CBR1	CBR1	Cbr1	x						x				x			x								x
Q91VT4	CBR4	CBR4	Cbr4	x	Matrix					x															x
S4R2F1	S4R2F1	CCG8	Cacng8	x							x														x
A0A2R8VI30	A0A2R8VI30	CD47	Cd47	x				x			x	x												x	x
A2AMQ5	A2AMQ5	CDS2	Cds2	x							x												x		x
Q9JKC6	CEND	CEND	Cend1	x							x		x												x
Q64433	CH10	CH10	Hspe1	x	Matrix					x															x
P63038	CH60	CH60	Hspd1	x	Matrix					x			x												x
Q91WS0	CISD1	CISD1	Cisd1	x	MOM					x			x												x
Q9CZU6	CISY	CISY	Cs	x	Matrix						x		x												x
Q6IRU5	CLCB	CLCB	Cltb	x						x		x					x							x	x
Q5SXR6	Q5SXR6	CLH1	Cltc	x		x		x	x		x	x					x		x						x
Q9QYB1	CLIC4	CLIC4	Clic4	x						x								x						x	x
Q06890	CLUS	CLUS	Clu	x			x	x			x						x								x
Q3U5Q7	CMPK2	CMPK2	Cmpk2	x	Matrix						x		x	x											x
P16330	CN37	CN37	Cnp	x				x			x													x	x
P12960	CNTN1	CNTN1	Cntn1	x							x														x
O54991	CNTP1	CNTP1	Cntnap1	x							x			x											x
E9QNF7	E9QNF7	CNTP2	Cntnap2	x																					x
P18760	COF1	COF1	Cfl1	x				x			x													x	x
P45591	COF2	COF2	Cfl2	x							x			x			x							x	x
Q8BMS4	COQ3	COQ3	Coq3	x	MIM					x			x	x											x
P00405	COX2	COX2	Mtco2	x						x															x
P00416	COX3	COX3	mt-Co3		MIM																				x
P19783	COX41	COX41	Cox4i1	x	MIM					x			x												x
P12787	COX5A	COX5A	Cox5a	x	MIM					x															x
Q9D881	Q9D881	COX5B	Cox5b-ps	x									x												x
Q9CPQ1	COX6C	COX6C	Cox6c	x	MIM								x												x
P84086	CPLX2	CPLX2	Cplx2	x					x		x	x													x
Q3UYN2	Q3UYN2	CPNE6	Cpne6	x							x	x										x			x
P52825	CPT2	CPT2	Cpt2	x	MIM					x			x	x		x									x
Q60737	CSK21	CSK21	Csnk2a1	x				x			x			x											x
Q6P9K8	CSKI1	CSKI1	Caskin1	x							x			x			x								x
A0A067XG53	A0A067XG53	CSKP	Cask	x							x			x			x								x
Q71M36	CSPG5	CSPG5	Cspg5	x					x		x		x	x											x
P97315	CSRP1	CSRP1	Csrp1	x						x															x
A0A0J9YU62	A0A0J9YU62	CTBP1	Ctbp1	x						x				x											x
Q61301	CTNA2	CTNA2	Ctnna2	x				x			x														x
Q02248	CTNB1	CTNB1	Ctnnb1	x				x			x													x	x
B7ZNF6	B7ZNF6	CTND2	Ctnnd2	x							x			x			x							x	x
P56391	CX6B1	CX6B1	Cox6b1	x	MIM					x			x												x
P48771	CX7A2	CX7A2	Cox7a2	x	MIM					x															x
P23242	CXA1	CXA1	Gja1	x					x		x	x		x										x	x
Q9D0M3	CY1	CY1	Cyc1	x	MIM					x			x												x
P62897	CYC	CYC	Cycs	x	IMS								x												x
A0A2I3BPH9	A0A2I3BPH9	CYRIB	Cyrib											x			x								x
Q5M8N4	D39U1	D39U1	Sdr39u1	x	unknown					x				x			x								x
P48318	DCE1	DCE1	Gad1	x							x	x					x							x	x
A0A0G2JGQ6	A0A0G2JGQ6	DCLK1	Dclk1	x							x			x			x								x
Q99KJ8	DCTN2	DCTN2	Dctn2	x						x							x	x							x
Q9CWS0	DDAH1	DDAH1	Ddah1	x							x					x	x							x	x
Q9CQ62	DECR	DECR	Decr1	x	Matrix					x			x				x								x
Q9R0P5	DEST	DEST	Dstn	x							x													x	x
G3UX44	G3UX44	DHB8	H2-Ke6	x						x															x
P26443	DHE3	DHE3	Glud1	x	Matrix						x		x												x
A0A0G2JGJ1	A0A0G2JGJ1	DHPR	Qdpr	x	Matrix					x			x												x
Q5U458	DJC11	DJC11	Dnajc11	x	MOM					x			x												x
O08749	DLDH	DLDH	Dld	x	Matrix		x				x		x	x											x
D3Z3B8	D3Z3B8	DLG1	Dlg1	x							x	x												x	x
A0A338P6J0	A0A338P6J0	DLG2	Dlg2	x							x	x												x	x
A0A338P6E5	A0A338P6E5	DLG4	Dlg4	x						x															x
D3Z709	D3Z709	DLGP1	Dlgap1	x						x		x					x								x
Q0VF59	Q0VF59	DLGP2	Dlgap2	x						x															x
B0V2P5	B0V2P5	DMXL2	Dmxl2	x							x														x
Q9QYJ0	DNJA2	DNJA2	Dnaja2	x						x						x	x			x					x
Q99M87	DNJA3	DNJA3	Dnaja3	x	Matrix					x		x	x												x
A2AUE1	A2AUE1	DNJC5	Dnajc5	x		x	x	x	x		x	x										x		x	x
Q8K1M6	DNM1L	DNM1L	Dnm1l	x	MOM						x	x					x								x
Q6NXK7	DPP10	DPP10	Dpp10	x							x														x
Q5U4C2	Q5U4C2	DPP6	Dpp6	x							x														x
Q6P1J1	Q6P1J1	DPYL1	Crmp1	x							x						x	x							x
O08553	DPYL2	DPYL2	Dpysl2	x							x						x							x	x
A0A0R4J1N0	A0A0R4J1N0	DPYL4	Dpysl4	x							x	x	x												x
Q9EQF6	DPYL5	DPYL5	Dpysl5	x							x			x			x								x
Q9JHU4	DYHC1	DYHC1	Dync1h1	x					x		x						x	x							x
P63168	DYL1	DYL1	Dynll1	x							x			x			x								x
A0A0J9YUN4	A0A0J9YUN4	DYN1	Dnm1	x							x														x
E9QLL2	E9QLL2	DYN3	Dnm3	x							x											x			x
A2AUK5	A2AUK5	E41L1	Epb41l1	x							x													x	x
O70318	E41L2	E41L2	Epb41l2	x							x			x										x	x
A0A5F8MPE1	A0A5F8MPE1	E41L3	Epb41l3	x			x				x													x	x
P56564	EAA1	EAA1	Slc1a3	x							x	x				x									x
P43006	EAA2	EAA2	Slc1a2	x			x				x														x
Q8BMS1	ECHA	ECHA	Hadha	x	MIM					x			x												x
Q99JY0	ECHB	ECHB	Hadhb	x	MIM					x			x												x
Q8BH95	ECHM	ECHM	Echs1	x	Matrix						x		x												x
P42125	ECI1	ECI1	Eci1	x	Matrix					x			x												x
P10126	EF1A1	EF1A1	Eef1a1	x					x								x								x
P62631	EF1A2	EF1A2	Eef1a2	x					x		x					x	x								x
P58252	EF2	EF2	Eef2	x		x					x						x							x	x
Q8K0D5	EFGM	EFGM	Gfm1	x	Matrix					x			x	x											x
Q8C845	Q8C845	EFHD2	Efhd2	x						x							x								x
Q8BFR5	EFTU	EFTU	Tufm	x	Matrix					x			x												x
Q8C522	ENDD1	ENDD1	Endod1	x							x				x										x
P17182	ENOA	ENOA	Eno1	x				x									x							x	x
P17183	ENOG	ENOG	Eno2	x							x						x							x	x
P08113	ENPL	ENPL	Hsp90b1	x							x												x		x
A0A1D5RLS1	A0A1D5RLS1	EP15R	Eps15l1	x							x	x													x
Q3UHT7	Q3UHT7	ERC2	Erc2	x						x															x
Q8BFZ9	ERLN2	ERLN2	Erlin2	x						x													x		x
Q99LC5	ETFA	ETFA	Etfa	x	Matrix					x			x												x
Q9DCW4	ETFB	ETFB	Etfb	x	Matrix					x			x												x
Q6PF96	Q6PF96	ETFD	Etfdh	x	MIM					x															x
Q9DCM0	ETHE1	ETHE1	Ethe1	x	Matrix					x			x												x
Q8C163	EXOG	EXOG	Exog	x	MIM					x			x												x
Q9CR98	F136A	F136A	Fam136a	x	IMS					x			x												x
Q05816	FABP5	FABP5	Fabp5	x					x		x						x							x	x
P11404	FABPH	FABPH	Fabp3	x						x											x	x		x	x
F8VPU2	FARP1	FARP1	Farp1	x							x						x								x
A0A0U1RNJ1	A0A0U1RNJ1	FAS	Fasn	x	IMS		x	x			x			x			x							x	x
G3X9U9	G3X9U9	FIS1	Fis1	x	MOM						x		x												x
O08917	FLOT1	FLOT1	Flot1	x		x	x		x		x	x										x		x	x
Q5SS83	Q5SS83	FLOT2	Flot2	x			x				x	x												x	x
Q61553	FSCN1	FSCN1	Fscn1	x							x						x							x	x
P97807	FUMH	FUMH	Fh	x							x		x												x
A0A0A0MQF6	A0A0A0MQF6	G3P	Gapdh	x				x			x	x			x		x							x	x
P06745	G6PI	G6PI	Gpi	x				x			x						x							x	x
Q9WV18	GABR1	GABR1	Gabbr1	x							x							x							x
Q80T41	GABR2	GABR2	Gabbr2	x							x														x
P61922	GABT	GABT	Abat	x	Matrix					x			x												x
Q9D172	GAL3A	GAL3A	Gatd3										x					x							x
P62874	GBB1	GBB1	Gnb1	x		x			x		x											x		x	x
P62880	GBB2	GBB2	Gnb2	x		x			x		x													x	x
P29387	GBB4	GBB4	Gnb4			x			x		x													x	x
A0A0N4SVT3	A0A0N4SVT3	GBG12	Gng12	x							x		x												x
P63213	GBG2	GBG2	Gng2					x			x	x												x	x
P62812	GBRA1	GBRA1	Gabra1	x							x			x										x	x
P50571	GBRB1	GBRB1	Gabrb1							x															x
A0A0A0MQ68	A0A0A0MQ68	GCDH	Gcdh	x	Matrix		x			x			x												x
Q3USC7	Q3USC7	GD1L1	Gdap1l1	x						x													x		x
O88741	GDAP1	GDAP1	Gdap1	x	MOM					x			x				x								x
P50396	GDIA	GDIA	Gdi1	x				x			x						x							x	x
Q61598	GDIB	GDIB	Gdi2	x				x	x		x						x							x	x
Q99PT1	GDIR1	GDIR1	Arhgdia	x				x		x							x								x
E9Q912	GDS1	GDS1	Rap1gds1							x							x								x
A0JNY3	A0JNY3	GEPH	Gphn	x			x			x		x					x								x
P03995	GFAP	GFAP	Gfap	x					x	x										x					x
Q9D6M3	GHC1	GHC1	Slc25a22	x	MIM								x	x											x
Q9DB41	GHC2	GHC2	Slc25a18	x	MIM					x			x	x											x
P15105	GLNA	GLNA	Glul	x			x				x		x				x							x	x
E9Q197	E9Q197	GLOD4	Glod4	x	Matrix					x							x								x
B1ASZ3	B1ASZ3	GLPK	Gk	x			x			x															x
Q80Y14	GLRX5	GLRX5	Glrx5	x	Matrix					x			x												x
D3Z7P3	GLSK	GLSK	Gls	x	MIM					x			x												x
B2RSH2	GNAI1	GNAI1	Gnai1	x					x		x			x		x		x							x
P08752	GNAI2	GNAI2	Gnai2	x				x			x			x			x							x	x
P18872	GNAO	GNAO	Gnao1	x							x														x
P21279	GNAQ	GNAQ	Gnaq	x		x		x	x		x			x			x							x	x
O70443	GNAZ	GNAZ	Gnaz	x							x	x													x
P62881	GNB5	GNB5	Gnb5	x							x			x			x	x							x
E0CXN5	E0CXN5	GPDA	Gpd1	x							x														x
Q64521	GPDM	GPDM	Gpd2	x	MIM		x			x			x												x
P35802	GPM6A	GPM6A	Gpm6a	x							x														x
A2AEG6	A2AEG6	GPM6B	Gpm6b	x							x														x
Q7TNB5	Q7TNB5	GRIA1	Gria1	x					x		x														x
P23819	GRIA2	GRIA2	Gria2	x					x		x														x
Q3UNH4	GRIN1	GRIN1	Gprin1	x								x												x	x
Q99LP6	GRPE1	GRPE1	Grpel1	x	Matrix					x			x												x
A2AE89	A2AE89	GSTM1	Gstm1	x			x				x						x		x						x
A0A494B908	A0A494B908	GSTP1	Gstp1	x						x			x				x								x
P32037	GTR3	GTR3	Slc2a3	x							x													x	x
Q9R111	GUAD	GUAD	Gda	x			x			x				x											x
P62806	H4	H4	H4c16	x										x											x
Q91VB8	Q91VB8	HBA	Hba-a1	x																					x
A2AFQ2	A2AFQ2	HCD2	Hsd17b10	x	Matrix		x			x															x
Q61425	HCDH	HCDH	Hadh	x	Matrix						x		x												x
Q640R3	HECAM	HECAM	Hepacam	x							x	x													x
A0A494BAI5	A0A494BAI5	HEMH	Fech	x	MIM					x															x
Q8QZS1	HIBCH	HIBCH	Hibch	x	Matrix					x			x												x
Q9D0S9	HINT2	HINT2	Hint2	x	Matrix					x			x												x
P38060	HMGCL	HMGCL	Hmgcl	x	Matrix					x															x
Q9Z2Y3	HOME1	HOME1	Homer1	x			x			x							x								x
E9Q0U7	E9Q0U7	HS105	Hsph1	x						x				x			x								x
Q8K0U4	HS12A	HS12A	Hspa12a	x							x						x					x			x
P48722	HS74L	HS74L	Hspa4l	x						x							x	x							x
P07901	HS90A	HS90A	Hsp90aa1	x				x	x		x						x								x
P11499	HS90B	HS90B	Hsp90ab1	x		x			x		x						x								x
Q3U2G2	Q3U2G2	HSP74	Hspa4	x							x			x			x								x
P63017	HSP7C	HSP7C	Hspa8	x		x		x	x		x	x		x											x
D3YX27	D3YX27	HTRA2	Htra2		MIM					x			x												x
G3UVV4	G3UVV4	HXK1	Hk1	x							x		x												x
Q3TZT4	Q3TZT4	I5P1	Inpp5a								x						x							x	x
Q60625	ICAM5	ICAM5	Icam5	x							x														x
Q9D6R2	IDH3A	IDH3A	Idh3a	x	Matrix					x			x												x
P54071	IDHP	IDHP	Idh2	x	Matrix						x		x												x
A0A0A0MQM0	A0A0A0MQM0	IF5A1	Eif5a	x										x			x							x	x
G3UYZ1	G3UYZ1	IGSF8	Igsf8	x							x	x													x
Q80ZJ2	Q80ZJ2	IMPA1	Impa1	x						x															x
D3Z636	D3Z636	IPYR2	Ppa2	x	Matrix					x			x												x
A0A1D5RM83	A0A1D5RM83	IQEC1	Iqsec1	x							x	x				x									x
P11881	ITPR1	ITPR1	Itpr1	x							x	x													x
Q9JHI5	IVD	IVD	Ivd	x	Matrix					x			x	x											x
Q9R0Y5	KAD1	KAD1	Ak1	x							x						x								x
Q9WTP7	KAD3	KAD3	Ak3	x	Matrix					x			x												x
A2ARF6	A2ARF6	KAD4	Ak4	x	Matrix					x			x												x
A0A0A6YX73	A0A0A6YX73	KAP2	Prkar2a	x				x			x														x
P31324	KAP3	KAP3	Prkar2b	x							x		x												x
P11798	KCC2A	KCC2A	Camk2a	x							x						x							x	x
Q5SVJ0	Q5SVJ0	KCC2B	Camk2b	x							x						x							x	x
A0A0G2JGS4	A0A0G2JGS4	KCC2D	Camk2d	x							x						x							x	x
A0A2I3BQP6	A0A2I3BQP6	KCC2G	Camk2g	x							x						x							x	x
Q04447	KCRB	KCRB	Ckb	x							x						x								x
P30275	KCRU	KCRU	Ckmt1	x	MIM																				x
E0CZ72	E0CZ72	KIF2A	Kif2a	x		x			x		x			x		x		x							x
Q61768	KINH	KINH	Kif5b	x					x		x						x	x							x
P63318	KPCG	KPCG	Prkcg	x							x														x
P52480	KPYM	KPYM	Pkm	x				x			x						x								x
A2AFG8	A2AFG8	L1CAM	L1cam	x							x			x										x	x
F6RJV6	F6RJV6	LANC2	Lancl2	x							x			x			x								x
Q61792	LASP1	LASP1	Lasp1	x						x							x				x			x	x
A0A1B0GSX0	A0A1B0GSX0	LDHA	Ldha	x							x	x					x								x
A0A6I8MX27	A0A6I8MX27	LDHB	Ldhb	x	unknown						x						x								x
Q9Z2I0	LETM1	LETM1	Letm1	x	MIM					x			x												x
A0A0G2JGB7	A0A0G2JGB7	LGI1	Lgi1	x							x														x
A9DA50	A9DA50	LIGO1	Lingo1	x							x													x	x
Q8CGK3	LONM	LONM	Lonp1	x	Matrix					x			x	x											x
Q6PB66	LPPRC	LPPRC	Lrpprc	x	Matrix					x			x												x
A0A0R4J0I9	A0A0R4J0I9	LRP1	Lrp1	x		x	x	x	x		x	x		x											x
A0A087WP70	A0A087WP70	LSAMP	Lsamp	x							x						x								x
Q8K356	Q8K356	LY6H	Ly6h	x							x														x
Q9CR62	M2OM	M2OM	Slc25a11	x	MIM					x															x
Q922B1	MACD1	MACD1	Macrod1		Matrix					x				x											x
A0A0A0MQA6	A0A0A0MQA6	MACF1	Macf1	x						x											x			x	x
Q3ZB60	Q3ZB60	MAG	Mag	x							x														x
Q99KE1	MAOM	MAOM	Me2	x	Matrix					x			x												x
Q8BMF3	MAON	MAON	Me3	x	Matrix					x															x
A2ARP8	A2ARP8	MAP1A	Map1a	x							x						x								x
P14873	MAP1B	MAP1B	Map1b	x							x						x								x
A0A0G2JDN7	A0A0G2JDN7	MAP4	Map4	x							x						x		x					x	x
Q7TSJ2	MAP6	MAP6	Map6	x					x		x													x	x
P26645	MARCS	MARCS	Marcks	x				x			x			x			x						x	x	x
Q6PER3	MARE3	MARE3	Mapre3	x						x															x
A0A498WGS3	A0A498WGS3	MBP	Mbp	x							x													x	x
Q99MR8	MCCA	MCCA	Mccc1	x	Matrix					x			x												x
Q3ULD5	MCCB	MCCB	Mccc2	x	Matrix					x			x												x
Q3UMR5	MCU	MCU	Mcu	x	MIM					x			x												x
A0A5F8MPN8	A0A5F8MPN8	MDHC	Mdh1	x				x			x						x	x							x
P08249	MDHM	MDHM	Mdh2	x	Matrix						x		x												x
Q9DCS3	MECR	MECR	Mecr	x	Matrix					x			x												x
Q80U63	MFN2	MFN2	Mfn2	x	MOM								x												x
D3Z0L4	D3Z0L4	MIC19	Chchd3	x	MIM					x			x												x
Q91VN4	MIC25	MIC25	Chchd6	x	MIM					x			x												x
Q9DCZ4	MIC26	MIC26	Apoo	x	MIM					x			x				x								x
Q8CAQ8	MIC60	MIC60	Immt	x	MIM					x			x												x
F6WMX7	F6WMX7	MICU3	Micu3	x	MIM					x															x
Q8BG51	MIRO1	MIRO1	Rhot1	x	MOM					x															x
Q9CXJ4	MITOS	MITOS	Abcb8		MIM					x			x	x											x
Q9EQ20	MMSA	MMSA	Aldh6a1	x	MIM					x			x												x
Q3UY21	Q3UY21	MOG	Mog	x							x														x
P31938	MP2K1	MP2K1	Map2k1	x							x						x							x	x
D3Z786	D3Z786	MPC1	Mpc1	x	MIM					x			x												x
Q9WV34	MPP2	MPP2	Mpp2	x							x														x
A0A668KLC6	A0A668KLC6	MTAP2	Map2	x							x						x							x	x
A0A3Q4EBT8	A0A3Q4EBT8	MTCH1	Mtch1	x	MOM					x															x
Q791V5	MTCH2	MTCH2	Mtch2	x	MOM						x		x												x
O88441	MTX2	MTX2	Mtx2	x	MOM					x			x			x									x
P16332	MUTA	MUTA	Mmut	x	Matrix								x				x								x
B2RRE2	B2RRE2	MY18A	Myo18a	x						x															x
Q3UH59	Q3UH59	MYH10	Myh10	x						x			x				x				x				x
A0A1W2P6F6	A0A1W2P6F6	MYL6	Myl6	x				x		x															x
D3YZ62	D3YZ62	MYO5A	Myo5a	x					x		x							x			x				x
E9PVU0	E9PVU0	MYO6	Myo6	x			x		x	x				x											x
P60202	MYPR	MYPR	Plp1	x							x														x
Q8K596	NAC2	NAC2	Slc8a2	x							x														x
F2Z456	F2Z456	NB5R3	Cyb5r3	x	MOM				x		x												x		x
E9QB01	E9QB01	NCAM1	Ncam1	x							x						x							x	x
O35136	NCAM2	NCAM2	Ncam2	x							x			x										x	x
Q9Z0E0	NCDN	NCDN	Ncdn	x						x							x								x
A2AS98	A2AS98	NCKP1	Nckap1	x				x			x						x								x
E9PZF0	E9PZF0	NDKA	Nme1	x						x							x								x
Q9QYG0	NDRG2	NDRG2	Ndrg2	x			x	x			x			x			x	x							x
Q9CQ75	NDUA2	NDUA2	Ndufa2	x	MIM					x															x
A0A0N4SVQ1	A0A0N4SVQ1	NDUA4	Ndufa4	x	MIM					x			x												x
Q9CPP6	NDUA5	NDUA5	Ndufa5	x	MIM					x															x
Q9CQZ5	NDUA6	NDUA6	Ndufa6	x	MIM					x															x
Q9Z1P6	NDUA7	NDUA7	Ndufa7	x	MIM					x			x												x
Q9DCJ5	NDUA8	NDUA8	Ndufa8	x	MIM					x			x												x
A0A0R3P9C8	A0A0R3P9C8	NDUA9	Ndufa9	x	MIM					x			x	x											x
Q99LC3	NDUAA	NDUAA	Ndufa10	x	MIM					x			x												x
G5E814	G5E814	NDUAB	Ndufa11	x	MIM					x			x												x
Q7TMF3	NDUAC	NDUAC	Ndufa12	x	MIM					x			x				x								x
Q9ERS2	NDUAD	NDUAD	Ndufa13	x	MIM								x												x
Q9CQC7	NDUB4	NDUB4	Ndufb4	x	MIM					x			x	x	x										x
D3Z568	D3Z568	NDUB5	Ndufb5	x	MIM					x			x	x											x
Q9CR61	NDUB7	NDUB7	Ndufb7	x	MIM					x															x
Q9D6J5	NDUB8	NDUB8	Ndufb8	x	MIM					x			x												x
Q9CQJ8	NDUB9	NDUB9	Ndufb9	x	MIM					x			x												x
Q9DCS9	NDUBA	NDUBA	Ndufb10	x	MIM					x															x
Q9CQ54	NDUC2	NDUC2	Ndufc2	x	MIM				x	x			x												x
Q91VD9	NDUS1	NDUS1	Ndufs1	x	MIM					x			x												x
Q91WD5	NDUS2	NDUS2	Ndufs2	x	MIM					x			x												x
Q9DCT2	NDUS3	NDUS3	Ndufs3	x	MIM					x			x	x											x
E9QPX3	E9QPX3	NDUS4	Ndufs4	x	MIM					x			x												x
B1ARW4	B1ARW4	NDUS5	Ndufs5	x	MIM					x															x
A0A1Y7VM38	A0A1Y7VM38	NDUS6	Ndufs6	x	MIM																				x
Q9DC70	NDUS7	NDUS7	Ndufs7	x	MIM					x															x
D3YUM1	D3YUM1	NDUV1	Ndufv1	x	MIM					x			x				x								x
Q9D6J6	NDUV2	NDUV2	Ndufv2	x	MIM					x			x	x			x								x
Q9CR95	NECP1	NECP1	Necap1	x							x	x					x								x
A0A4W9	A0A4W9	NEGR1	Negr1	x							x	x					x				x				x
P06837	NEUM	NEUM	Gap43	x							x													x	x
Q810U3	NFASC	NFASC	Nfasc	x							x														x
P19246	NFH	NFH	Nefh							x															x
P08551	NFL	NFL	Nefl	x						x				x					x	x					x
A0A0R4J036	A0A0R4J036	NFM	Nefm	x						x										x					x
Q9Z1J3	NFS1	NFS1	Nfs1	x	Matrix					x				x			x								x
O55125	NIPS1	NIPS1	Nipsnap1	x	Matrix					x															x
Q7TMG8	Q7TMG8	NIPS2	Nipsnap2	x	Matrix								x												x
A2AI14	A2AI14	NMDZ1	Grin1	x					x	x															x
J3QMM7	J3QMM7	NNRD	Naxd	x	MIM					x															x
A3KGE4	A3KGE4	NOE1	Olfm1	x							x			x		x	x								x
P97300	NPTN	NPTN	Nptn	x				x			x													x	x
Q62443	NPTX1	NPTX1	Nptx1	x							x	x										x			x
E0CY11	E0CY11	NRX1A	Nrxn1	x							x													x	x
P46460	NSF	NSF	Nsf	x		x	x	x	x		x						x					x			x
Q3UHB1	NT5D3	NT5D3	Nt5dc3	x	Matrix					x			x				x								x
D3Z396	D3Z396	NTRI	Ntm	x							x														x
P03921	NU5M	NU5M	Mtnd5	x						x															x
Q9D8W7	OCAD2	OCAD2	Ociad2	x	unknown					x			x												x
P53395	ODB2	ODB2	Dbt	x	Matrix					x			x												x
Q60597	ODO1	ODO1	Ogdh	x	Matrix						x		x												x
Q9D2G2	ODO2	ODO2	Dlst	x	Matrix						x		x	x			x								x
Q8BMF4	ODP2	ODP2	Dlat	x	Matrix						x		x												x
P35486	ODPA	ODPA	Pdha1	x	Matrix						x		x												x
Q9D051	ODPB	ODPB	Pdhb	x	Matrix					x			x	x											x
Q8BKZ9	ODPX	ODPX	Pdhx	x	Matrix					x			x	x										x	x
G3XA53	G3XA53	OMGP	Omg	x							x														x
P58281	OPA1	OPA1	Opa1	x	MIM					x			x	x											x
D3YWF6	D3YWF6	OTUB1	Otub1	x						x							x								x
E9Q0A7	E9Q0A7	OXR1	Oxr1	x	MOM			x		x		x													x
Q9Z110	P5CS	P5CS	Aldh18a1	x	Matrix					x			x												x
Q61644	PACN1	PACN1	Pacsin1	x							x	x		x											x
Q9Z0P4	PALM	PALM	Palm	x							x			x										x	x
Q9JLB0	PALS2	PALS2	Pals2					x																	x
Q91ZA3	PCCA	PCCA	Pcca	x	Matrix					x			x												x
Q99MN9	PCCB	PCCB	Pccb	x	Matrix					x															x
A0A0R4J0G0	A0A0R4J0G0	PCKGM	Pck2	x	Matrix					x			x												x
Q9QYX7	PCLO	PCLO	Pclo	x							x			x										x	x
Q9QXV0	PCS1N	PCS1N	Pcsk1n								x	x													x
P27773	PDIA3	PDIA3	Pdia3	x							x												x		x
Q8BFP9	PDK1	PDK1	Pdk1	x	Matrix					x															x
Q62048	PEA15	PEA15	Pea15	x						x		x		x			x								x
P70296	PEBP1	PEBP1	Pebp1	x				x			x						x							x	x
P12382	PFKAL	PFKAL	Pfkl	x							x		x			x									x
P47857	PFKAM	PFKAM	Pfkm	x							x												x		x
Q8C605	Q8C605	PFKAP	Pfkp	x							x						x								x
Q9DBJ1	PGAM1	PGAM1	Pgam1	x				x			x			x											x
P09411	PGK1	PGK1	Pgk1	x				x			x														x
A2CEK3	A2CEK3	PGM1	Pgm1	x			x			x							x								x
P67778	PHB1	PHB1	Phb1										x												x
O35129	PHB2	PHB2	Phb2	x	MIM					x			x												x
Q80TL4	PHF24	PHF24	Phf24	x							x														x
Q8K0S0	PHYIP	PHYIP	Phyhip	x							x		x	x											x
A0A140T8I9	A0A140T8I9	PI4KA	Pi4ka	x				x			x			x										x	x
E0CYV0	E0CYV0	PIMT	Pcmt1	x						x							x								x
Q9Z1B3	PLCB1	PLCB1	Plcb1	x							x													x	x
Q9QXS1	PLEC	PLEC	Plec	x						x							x			x	x				x
Q99JY8	PLPP3	PLPP3	Plpp3	x				x		x												x			x
P62137	PP1A	PP1A	Ppp1ca	x				x			x			x			x							x	x
P63328	PP2BA	PP2BA	Ppp3ca	x							x			x			x								x
P17742	PPIA	PPIA	Ppia	x				x			x														x
P24369	PPIB	PPIB	Ppib	x							x			x									x		x
Q9CR16	PPID	PPID	Ppid	x						x				x		x	x								x
B1AXW5	B1AXW5	PRDX1	Prdx1	x									x												x
Q61171	PRDX2	PRDX2	Prdx2	x	unknown			x			x						x								x
P20108	PRDX3	PRDX3	Prdx3	x	Matrix		x			x		x	x												x
P99029	PRDX5	PRDX5	Prdx5	x	Matrix					x			x												x
Q6GT24	Q6GT24	PRDX6	Prdx6	x	unknown	x	x	x	x		x						x							x	x
Q9WU79	PROD	PROD	Prodh	x	MIM							x	x	x											x
P62962	PROF1	PROF1	Pfn1	x							x						x								x
D3YWS3	D3YWS3	PROF2	Pfn2	x						x															x
E9PUL5	PRRT2	PRRT2	Prrt2	x							x													x	x
Q11011	PSA	PSA	Npepps	x						x							x								x
A0A0G2JF97	A0A0G2JF97	PSA5	Psma5	x			x	x		x							x								x
O55234	PSB5	PSB5	Psmb5	x			x	x			x			x				x							x
Q8BGC4	PTGR3	PTGR3	Ptgr3	x								x		x								x			x
P80560	PTPR2	PTPR2	Ptprn2	x							x	x													x
B2RXS8	B2RXS8	PTPRZ	Ptprz1								x	x					x								x
Q3U125	Q3U125	PXL2A	Prxl2a		Membrane																				x
Q9DB60	PXL2B	PXL2B	Prxl2b											x			x								x
G5E8R3	G5E8R3	PYC	Pcx	x	Matrix																				x
Q8CI94	PYGB	PYGB	Pygb	x					x		x						x								x
E9PUM3	E9PUM3	PYGM	Pygm	x							x														x
Q9CZ13	QCR1	QCR1	Uqcrc1	x	MIM					x			x												x
Q9DB77	QCR2	QCR2	Uqcrc2	x	MIM					x			x												x
Q9CQB4	Q9CQB4	QCR7	Uqcrb	x	MIM					x															x
Q9CQ69	QCR8	QCR8	Uqcrq	x	MIM					x			x												x
P61027	RAB10	RAB10	Rab10	x			x				x														x
Q91V41	RAB14	RAB14	Rab14	x		x	x		x		x	x													x
P62821	RAB1A	RAB1A	Rab1A	x			x				x						x						x		x
P35282	RAB21	RAB21	Rab21	x			x				x														x
P53994	RAB2A	RAB2A	Rab2a	x		x	x		x		x														x
Q6PHN9	RAB35	RAB35	Rab35	x							x														x
P63011	RAB3A	RAB3A	Rab3a	x							x			x			x	x							x
A0A286YDR2	A0A286YDR2	RAB3C	Rab3c	x							x						x								x
Q8C266	Q8C266	RAB5C	Rab5c	x		x			x		x	x													x
P35279	RAB6A	RAB6A	Rab6a	x			x				x											x			x
P51150	RAB7A	RAB7A	Rab7a	x		x	x		x		x	x													x
P61028	RAB8B	RAB8B	Rab8b								x														x
P63321	RALA	RALA	Rala	x				x			x										x			x	x
A0A0G2JDL9	A0A0G2JDL9	RAP1A	Rap1a								x														x
Q9ERI6	RDH14	RDH14	Rdh14	x	Membrane	x	x	x	x		x			x			x								x
G3X8R0	G3X8R0	REEP5	Reep5	x							x												x		x
A0A0A6YXF6	A0A0A6YXF6	RHOA	Rhoa	x				x			x						x							x	x
P62746	RHOB	RHOB	Rhob	x				x	x		x														x
P52760	RIDA	RIDA	Rida		Matrix																				x
P35979	RL12	RL12	Rpl12	x							x											x			x
A0A1B0GQU8	A0A1B0GQU8	RL18	Rpl18	x		x					x					x	x						x		x
P27659	RL3	RL3	Rpl3	x							x					x	x								x
P62918	RL8	RL8	Rpl8	x												x	x						x		x
P47708	RP3A	RP3A	Rph3a	x							x														x
Q9EQZ6	RPGF4	RPGF4	Rapgef4	x						x											x				x
Q91YQ5	RPN1	RPN1	Rpn1	x							x						x						x		x
Q8K0T0	RTN1	RTN1	Rtn1	x							x			x									x		x
Q99P72	RTN4	RTN4	Rtn4	x							x												x		x
A0A076FR46	A0A076FR46	S12A5	Slc12a5	x							x														x
Q8BH59	S2512	S2512	Slc25a12		MIM					x				x			x								x
Q8BGP6	S2540	S2540	Slc25a40		MIM																				x
A0A0A6YWF5	A0A0A6YWF5	S38A3	Slc38a3	x			x				x						x		x						x
Q5DTL9	S4A10	S4A10	Slc4a10	x							x														x
E9Q8N8	E9Q8N8	S4A4	Slc4a4	x			x				x														x
P31650	S6A11	S6A11	Slc6a11	x							x	x		x											x
Q80SW1	SAHH2	SAHH2	Ahcyl1	x	MOM						x						x								x
F8WGT1	F8WGT1	SAHH3	Ahcyl2	x							x			x			x								x
Q8BGH2	SAM50	SAM50	Samm50	x	MOM		x			x			x												x
J3QPG5	J3QPG5	SAP	Psap	x		x	x	x	x	x		x													x
O35874	SATT	SATT	Slc1a4	x							x							x							x
P31648	SC6A1	SC6A1	Slc6a1	x							x														x
Q8C8N2	SCAI	SCAI	Scai	x							x			x	x										x
Q3TSA8	Q3TSA8	SCAM1	Scamp1	x			x	x			x	x		x										x	x
Q9JKD3	SCAM5	SCAM5	Scamp5	x			x				x														x
A2ASZ8	SCMC2	SCMC2	Slc25a25	x	MIM					x		x	x												x
Q6GQS1	SCMC3	SCMC3	Slc25a23	x	MIM					x			x												x
A0A5H1ZRM8	A0A5H1ZRM8	SCN2A	Scn2a								x														x
Q3UJQ9	Q3UJQ9	SCOT1	Oxct1	x	Matrix					x			x												x
P32020	SCP2	SCP2	Scp2		MIM					x		x		x											x
Q8R127	SCPDL	SCPDL	Sccpdh	x							x	x													x
O35114	SCRB2	SCRB2	Scarb2	x		x	x	x	x		x						x								x
Q9CZC8	SCRN1	SCRN1	Scrn1	x						x							x								x
Q8K2B3	SDHA	SDHA	Sdha	x	MIM					x			x			x									x
Q9CQA3	SDHB	SDHB	Sdhb	x	MIM					x			x	x										x	x
Q61753	SERA	SERA	Phgdh	x						x				x			x							x	x
Q99K85	SERC	SERC	Psat1	x						x							x								x
Q99JR1	SFXN1	SFXN1	Sfxn1	x	MIM					x			x												x
Q3U4F0	Q3U4F0	SFXN3	Sfxn3	x	MIM					x			x												x
Q8BRQ9	Q8BRQ9	SFXN5	Sfxn5	x	MIM					x			x	x											x
D3YZU4	D3YZU4	SHAN1	Shank1	x							x													x	x
A0A1C7ZMY3	A0A1C7ZMY3	SHAN2	Shank2	x							x	x		x										x	x
Q4ACU6	SHAN3	SHAN3	Shank3	x						x				x										x	x
A2AWI7	A2AWI7	SHLB2	Sh3glb2	x							x			x			x								x
P97797	SHPS1	SHPS1	Sirpa	x							x														x
Q8C3Q5	SHSA7	SHSA7	Shisa7	x						x							x								x
A0A140LHL5	A0A140LHL5	SIR2	Sirt2	x							x			x		x	x								x
Q9DB05	SNAA	SNAA	Napa	x			x	x			x						x								x
P28663	SNAB	SNAB	Napb	x							x						x								x
D3Z4B2	D3Z4B2	SNAG	Napg	x		x	x	x	x		x													x	x
O55100	SNG1	SNG1	Syngr1	x				x	x		x						x								x
Q8R191	SNG3	SNG3	Syngr3	x							x													x	x
P60879	SNP25	SNP25	Snap25	x							x	x												x	x
Q80U23	SNPH	SNPH	Snph	x						x			x						x						x
P08228	SODC	SODC	Sod1	x	IMS	x	x	x	x		x			x			x							x	x
P09671	SODM	SODM	Sod2	x	Matrix						x		x												x
G3UXX3	G3UXX3	SPRE	Spr	x	unknown					x				x			x								x
E9Q397	E9Q397	SPTB1	Sptb	x				x			x						x								x
Q62261	SPTB2	SPTB2	Sptbn1	x				x			x						x								x
A3KGU7	A3KGU7	SPTN1	Sptan1	x							x	x							x						x
Q921L6	Q921L6	SRC8	Cttn	x						x		x					x					x		x	x
A0A571BDG0	A0A571BDG0	SRCN1	Srcin1	x							x													x	x
Q8BWF0	SSDH	SSDH	Aldh5a1	x	Matrix					x			x												x
Q99JB2	STML2	STML2	Stoml2	x	MIM					x							x							x	x
D3Z1Z8	D3Z1Z8	STMN1	Stmn1	x							x						x								x
O35526	STX1A	STX1A	Stx1a	x							x	x			x										x
P61264	STX1B	STX1B	Stx1b	x							x	x			x										x
O08599	STXB1	STXB1	Stxbp1	x							x			x			x								x
Q9WUM5	SUCA	SUCA	Suclg1	x	Matrix						x		x				x							x	x
Q9Z2I9	SUCB1	SUCB1	Sucla2	x	Matrix					x			x												x
Q9Z2I8	SUCB2	SUCB2	Suclg2	x	Matrix					x			x											x	x
Q9JIS5	SV2A	SV2A	Sv2a	x							x						x								x
Q8BG39	SV2B	SV2B	Sv2b	x							x														x
A0A0A6YVS6	A0A0A6YVS6	SYGP1	Syngap1	x							x			x											x
Q8BIJ6	SYIM	SYIM	Iars2	x	Matrix					x			x												x
O88935	SYN1	SYN1	Syn1	x							x														x
Q64332	SYN2	SYN2	Syn2	x							x			x											x
D3Z656	D3Z656	SYNJ1	Synj1	x							x			x			x	x							x
Q8CC35	SYNPO	SYNPO	Synpo	x							x						x				x			x	x
Q62277	SYPH	SYPH	Syp	x							x														x
P46096	SYT1	SYT1	Syt1	x			x				x														x
A0A0R4J2C2	A0A0R4J2C2	SYT2	Syt2	x							x														x
O55042	SYUA	SYUA	Snca	x					x		x														x
Q91ZZ3	SYUB	SYUB	Sncb	x							x														x
Q9R1Q8	TAGL3	TAGL3	Tagln3	x				x		x															x
B1AQW2	B1AQW2	TAU	Mapt	x							x			x										x	x
A0A0A0MQA5	A0A0A0MQA5	TBA4A	Tuba4a	x							x								x						x
Q9ERD7	TBB3	TBB3	Tubb3	x				x			x								x						x
Q9D6F9	TBB4A	TBB4A	Tubb4a	x				x			x								x						x
P99024	TBB5	TBB5	Tubb5	x							x														x
P11983	TCPA	TCPA	Tcp1	x				x			x														x
P80314	TCPB	TCPB	Cct2	x				x	x		x						x								x
G5E839	G5E839	TCPD	Cct4	x				x			x			x			x								x
P80316	TCPE	TCPE	Cct5	x				x			x														x
P80318	TCPG	TCPG	Cct3	x				x			x						x							x	x
P80313	TCPH	TCPH	Cct7	x				x			x						x								x
P42932	TCPQ	TCPQ	Cct8	x				x	x		x			x			x			x					x
Q52KG9	Q52KG9	TCPZ	Cct6a	x				x			x						x								x
A0A0G2JFB2	A0A0G2JFB2	TDRKH	Tdrkh	x	Membrane					x							x	x							x
Q8BYI9	TENR	TENR	Tnr	x						x															x
Q01853	TERA	TERA	Vcp	x		x			x		x			x			x								x
Q8QZT1	THIL	THIL	Acat1	x	Matrix					x			x												x
Q8BWT1	THIM	THIM	Acaa2	x	Matrix					x			x												x
P10639	THIO	THIO	Txn	x			x				x			x			x								x
Q99J99	THTM	THTM	Mpst	x	MIM					x			x				x								x
P52196	THTR	THTR	Tst	x	Matrix					x			x												x
A0A1L1SUX8	A0A1L1SUX8	THY1	Thy1	x							x			x										x	x
P62073	TIM10	TIM10	Timm10	x	MIM					x			x												x
A0A1W2P756	A0A1W2P756	TIM13	Timm13	x	MIM					x			x			x									x
O35857	TIM44	TIM44	Timm44	x	MIM					x			x												x
Q9D880	TIM50	TIM50	Timm50	x	MIM					x			x	x											x
Q9WV98	TIM9	TIM9	Timm9	x	MIM					x			x												x
P40142	TKT	TKT	Tkt	x				x			x			x											x
Q4VAE3	TMM65	TMM65	Tmem65	x	MIM					x															x
Q9JKK7	TMOD2	TMOD2	Tmod2	x						x				x		x									x
Q9CPQ3	TOM22	TOM22	Tomm22	x	MOM					x			x												x
Q9CZW5	TOM70	TOM70	Tomm70	x							x		x												x
A2AUD5	A2AUD5	TPD54	Tpd52l2	x							x	x					x								x
P17751	TPIS	TPIS	Tpi1	x				x			x			x											x
G5E8R0	G5E8R0	TPM1	Tpm1	x				x		x							x				x				x
O89023	TPP1	TPP1	Tpp1	x		x	x	x	x	x															x
Q7TQD2	TPPP	TPPP	Tppp	x							x		x				x								x
Q9CRB6	TPPP3	TPPP3	Tppp3	x						x						x									x
Q9CQN1	TRAP1	TRAP1	Trap1	x	Matrix					x			x												x
Q8JZU2	TXTP	TXTP	Slc25a1	x	MIM		x			x															x
Q02053	UBA1	UBA1	Uba1	x		x		x	x	x				x			x								x
P61089	UBE2N	UBE2N	Ube2n	x				x		x				x		x									x
Q3U4W8	Q3U4W8	UBP5	Usp5	x					x	x				x			x								x
Q9R0P9	UCHL1	UCHL1	Uchl1	x					x		x			x			x								x
Q9CR68	UCRI	UCRI	Uqcrfs1	x	MIM					x			x												x
P51863	VA0D1	VA0D1	Atp6v0d1	x		x	x	x	x		x														x
A0A0N4SUV3	A0A0N4SUV3	VAMP1	Vamp1	x			x				x														x
B0QZN5	B0QZN5	VAMP2	Vamp2	x			x	x			x														x
Q8BH80	Q8BH80	VAPB	Vapb	x			x				x												x		x
Q62465	VAT1	VAT1	Vat1	x				x	x		x														x
P50516	VATA	VATA	Atp6v1a	x		x	x	x	x		x	x		x			x								x
P62814	VATB2	VATB2	Atp6v1b2	x		x	x	x	x		x	x													x
Q9Z1G3	VATC1	VATC1	Atp6v1c1	x		x	x	x	x		x			x			x								x
P57746	VATD	VATD	Atp6v1d	x		x	x	x	x		x			x										x	x
P50518	VATE1	VATE1	Atp6v1e1	x		x	x	x	x		x														x
Q9WTT4	VATG2	VATG2	Atp6v1g2	x							x														x
A0A0A6YWP6	A0A0A6YWP6	VATH	Atp6v1h	x		x	x	x	x		x						x				x			x	x
Q60932	VDAC1	VDAC1	Vdac1	x	MOM		x				x														x
G3UX26	G3UX26	VDAC2	Vdac2	x	MOM		x				x		x												x
J3QMG3	J3QMG3	VDAC3	Vdac3	x	MOM		x				x		x												x
O35633	VIAAT	VIAAT	Slc32a1	x							x						x								x
P20152	VIME	VIME	Vim	x						x										x					x
P62761	VISL1	VISL1	Vsnl1	x							x						x								x
K3W4T3	K3W4T3	VPP1	Atp6v0a1	x			x	x	x		x	x		x			x					x			x
Q9EQH3	VPS35	VPS35	Vps35	x		x	x	x	x	x		x													x
O88342	WDR1	WDR1	Wdr1	x						x														x	x
Q8CBE3	WDR37	WDR37	Wdr37	x							x									x					x
Q920I9	WDR7	WDR7	Wdr7	x							x			x			x								x
A0A0A6YW67	A0A0A6YW67	A0A0A6YW67	Gm8797
A2ALL9	A2ALL9	A2ALL9	Atp2b3								x
A0A0R4J083	A0A0R4J083	ACADL	Acadl	x	MIM					x
Q9QYR9	ACOT2	ACOT2	Acot2		Matrix					x			x
P63260	ACTG	ACTG	Actg1	x							x
Q925I1	ATAD3	ATAD3	Atad3	x						x
B2RXT3	B2RXT3	B2RXT3	Ogdhl		Matrix					x						x
Q99L04	DHRS1	DHRS1	Dhrs1	x	MIM					x				x			x	x
A0A0R4J094	A0A0R4J094	FAHD2	Fahd2a	x	Matrix
G5E8G3	G5E8G3	G5E8G3	Opcml								x
P63094	GNAS2	GNAS2	Gnas					x			x			x			x							x
P38647	GRP75	GRP75	Hspa9	x	Matrix					x			x
Q6ZWY9	H2B1C	H2B1C	H2bc8											x			x
A8DUK4	A8DUK4	HBB1	Hbb-b1	x
I3ITR1	I3ITR1	I3ITR1	AK157302
P70404	IDHG1	IDHG1	Idh3g	x	Matrix						x		x			x
P85094	ISC2A	ISC2A	Isoc2a	x	Matrix		x
Q9DC07	LNEBL	LNEBL	Nebl	x						x
Q8BI08	MAL2	MAL2	Mal2	x			x
Q922Q1	MARC2	MARC2	Mtarc2	x	MOM
G5E902	G5E902	MPCP	Slc25a3	x	MIM					x			x
A0A7N9VS49	A0A7N9VS49	NAKD2	Nadk2	x	Matrix					x			x
Q922Q4	P5CR2	P5CR2	Pycr2	x	Matrix					x			x
A0A0G2JGY9	A0A0G2JGY9	PLPR4	Plppr4	x							x
Q68FG2	Q68FG2	Q68FG2	Sptbn2							x		x					x							x
Q91VA7	Q91VA7	Q91VA7	Idh3b		Matrix						x		x
A0A0A6YWZ0	A0A0A6YWZ0	QORL2	Cryzl2	x	Matrix
Q9DB15	RM12	RM12	Mrpl12	x	Matrix					x			x
B2RQX9	B2RQX9	SC6A5	Slc6a5							x
A0A0J9YTY0	A0A0J9YTY0	SEPT11	Septin11	x													x
D3YYB1	D3YYB1	SEPT2	Septin2	x										x					x		x			x
A0A2R8W6V9	A0A2R8W6V9	SEPT3	Septin3	x										x							x			x
A0A338P6R8	A0A338P6R8	SEPT5	Septin5	x										x			x				x
E9Q1G8	E9Q1G8	SEPT7	Septin7	x													x		x		x			x
B1AQY9	B1AQY9	SEPT8	Septin8	x													x				x
A2A6U3	A2A6U3	SEPT9	Septin9	x																	x
B2FDF6	B2FDF6	SNP47	Snap47	x			x				x						x
Q6NZL0	SOGA3	SOGA3	Soga3	x							x			x			x
Q3UUI3	THEM4	THEM4	Them4	x	MIM					x

## Sheet: WT-12-18-24 Consensus
WT-12-18-24 Consensus Lipofuscin Proteome				S-Acylated Protein Annotation	Mitochondrial Subcompartment Annotation	Lysosomal Protein Annotation				Synaptic Protein Annotation		Human Protein Atlas Organelle Annotation													Human Brain Lipofuscin
UniProt Accession	SWISSPROT Accession	UniProt ID	Gene Name	Brain Palmitome (Gorenberg et al., 2022)	MitoCarta 3.0 Annotation	Known Lysosomal Proteins (Laqtom et al., 2022)	Proteins Enriched in Lyso-IP (Laqtom et al., 2022)	Lysosomal Proteins (Chapel et al., 2013)	Known Lysosomal Proteins (Akter et al., 2023)	Synaptosome Proteins (Taoufiq et al., 2020)	Synaptic Vesicle (SV) Proteins (Taoufiq et al., 2020)	Vesicles	Mitochondria	Nucleoplasm	Nuclear Membrane	Nucleoli	Cytosol	Centrosome	Microtubules	Intermediate Filaments	Actin Filaments	Golgi Apparatus	Endoplasmic Reticulum	Plasma Membrane	(This Paper)
Q9CQV8	1433B	1433B	Ywhab	x				x			x						x								x
P62259	1433E	1433E	Ywhae	x				x			x						x								x
P68510	1433F	1433F	Ywhah	x							x														x
P61982	1433G	1433G	Ywhag	x							x						x								x
P68254	1433T	1433T	Ywhaq	x							x			x			x								x
P63101	1433Z	1433Z	Ywhaz	x							x														x
Q76MZ3	2AAA	2AAA	Ppp2r1a	x				x			x						x								x
Q99L13	3HIDH	3HIDH	Hibadh	x	Matrix					x															x
P10852	4F2	4F2	Slc3a2	x				x	x		x			x										x	x
Q3UHJ0	AAK1	AAK1	Aak1	x							x	x					x							x	x
P05201	AATC	AATC	Got1	x		x		x	x		x														x
P05202	AATM	AATM	Got2	x	MIM						x														x
Q61102	ABCB7	ABCB7	Abcb7	x	MIM					x			x												x
Q99LR1	ABD12	ABD12	Abhd12	x			x				x														x
Q6PE15	ABHDA	ABHDA	Abhd10	x	Matrix					x			x												x
A0A087WRS3	A0A087WRS3	ABI2	Abi2	x							x	x		x			x								x
E9Q030	E9Q030	ABLM1	Ablim1	x							x						x								x
Q8BL65	ABLM2	ABLM2	Ablim2	x						x			x	x											x
A0A0R4J0P1	A0A0R4J0P1	ACAD8	Acad8	x	Matrix					x															x
Q8JZN5	ACAD9	ACAD9	Acad9	x	MIM					x			x												x
P45952	ACADM	ACADM	Acadm	x	Matrix					x			x												x
P50544	ACADV	ACADV	Acadvl	x	MIM					x			x	x		x									x
Q99PU5	ACBG1	ACBG1	Acsbg1	x							x	x													x
Q9DBL1	ACDSB	ACDSB	Acadsb	x	Matrix					x			x												x
Q3V117	Q3V117	ACLY	Acly	x	Matrix		x	x	x		x			x			x								x
Q9CQR4	ACO13	ACO13	Acot13	x	Matrix					x														x	x
Q99KI0	ACON	ACON	Aco2	x	Matrix					x			x												x
Q9R0X4	ACOT9	ACOT9	Acot9	x	MIM					x				x			x							x	x
F6ZFT1	F6ZFT1	ACPM	Ndufab1	x	MIM					x			x	x											x
Q8VCW8	ACSF2	ACSF2	Acsf2	x	Matrix					x				x			x		x						x
D3Z041	D3Z041	ACSL1	Acsl1	x	MOM						x	x													x
Q91WC3	ACSL6	ACSL6	Acsl6	x	MOM						x														x
A1BN54	A1BN54	ACTN1	Actn1	x			x			x							x				x			x	x
E9Q2W9	E9Q2W9	ACTN4	Actn4	x						x							x				x				x
D3YUP9	D3YUP9	ADA22	Adam22	x							x													x	x
Q9R1V7	ADA23	ADA23	Adam23	x							x														x
Q9D0L4	ADCK1	ADCK1	Adck1	x	unknown					x				x											x
Q9QYB8	ADDB	ADDB	Add2	x						x				x			x							x	x
Q9QYB5	ADDG	ADDG	Add3	x						x														x	x
P48962	ADT1	ADT1	Slc25a4	x	MIM						x		x												x
P51881	ADT2	ADT2	Slc25a5	x	MIM					x			x												x
Q8JZQ2	AFG32	AFG32	Afg3l2	x	MIM					x			x												x
Q3UHD9	AGAP2	AGAP2	Agap2	x							x			x			x		x						x
Q9ESW4	AGK	AGK	Agk	x	MIM					x		x	x												x
H7BX15	H7BX15	AGRL1	Adgrl1	x						x															x
B1AU25	B1AU25	AIFM1	Aifm1	x	MIM					x			x												x
P46660	AINX	AINX	Ina	x							x						x			x					x
A2AJA9	AJM1	AJM1	Ajm1																			x		x	x
Q9JII6	AK1A1	AK1A1	Akr1a1	x				x		x				x			x								x
D3YVF0	AKAP5	AKAP5	Akap5	x				x			x			x											x
P24549	AL1A1	AL1A1	Aldh1a1	x			x			x							x								x
Q9CZS1	AL1B1	AL1B1	Aldh1b1	x	Matrix					x			x												x
Q8R0Y6	AL1L1	AL1L1	Aldh1l1	x	Matrix		x			x							x								x
B1ATI0	B1ATI0	AL3A2	Aldh3a2	x	Membrane		x				x						x						x		x
Q8CHT0	AL4A1	AL4A1	Aldh4a1	x	Matrix					x			x												x
Q9DBF1	AL7A1	AL7A1	Aldh7a1	x	Matrix		x			x			x				x								x
Q9JLJ2	AL9A1	AL9A1	Aldh9a1	x	Matrix					x							x								x
P47738	ALDH2	ALDH2	Aldh2	x	Matrix						x														x
P05064	ALDOA	ALDOA	Aldoa	x				x			x						x								x
P05063	ALDOC	ALDOC	Aldoc	x							x	x		x		x	x								x
P45376	ALDR	ALDR	Akr1b1	x				x	x	x				x			x								x
A0A0G2JEG8	A0A0G2JEG8	AMPH	Amph	x							x						x							x	x
Q9CPY7	AMPL	AMPL	Lap3	x	Matrix		x			x				x			x		x						x
A0A0R4J1N7	A0A0R4J1N7	ANK1	Ank1	x							x														x
S4R2T7	S4R2T7	ANK2	Ank2	x					x		x													x	x
S4R2K9	S4R2K9	ANK3	Ank3	x		x			x		x													x	x
A0A0R4J2A6	A0A0R4J2A6	ANS1B	Anks1b	x						x				x										x	x
P48036	ANXA5	ANXA5	Anxa5	x				x			x				x										x
P14824	ANXA6	ANXA6	Anxa6	x		x			x		x						x								x
Q64133	AOFA	AOFA	Maoa	x	MOM						x		x				x								x
Q8BW75	AOFB	AOFB	Maob	x	MOM		x				x														x
Q61548	AP180	AP180	Snap91	x							x						x	x							x
O35643	AP1B1	AP1B1	Ap1b1	x				x	x		x	x					x					x			x
D3YZ71	D3YZ71	AP1M1	Ap1m1	x			x	x	x	x		x					x								x
P17426	AP2A1	AP2A1	Ap2a1	x				x	x		x	x													x
P17427	AP2A2	AP2A2	Ap2a2	x				x	x		x	x		x											x
Q9DBG3	AP2B1	AP2B1	Ap2b1	x				x	x		x	x													x
Q3TWV4	Q3TWV4	AP2M1	Ap2m1	x				x	x		x													x	x
A0A571BES1	A0A571BES1	AP3B2	Ap3b2	x					x		x			x			x					x			x
O54774	AP3D1	AP3D1	Ap3d1	x		x		x	x		x						x								x
A0A0R4J0Z3	A0A0R4J0Z3	AQP4	Aqp4	x						x														x	x
Q9R0Q6	ARC1A	ARC1A	Arpc1a	x							x						x							x	x
P61205	ARF3	ARF3	Arf3				x				x														x
P62331	ARF6	ARF6	Arf6	x							x						x								x
Q3TGS9	Q3TGS9	ARFG1	Arfgap1	x						x		x			x		x					x			x
Q9D0L7	ARM10	ARM10	Armc10	x	MOM					x			x												x
P61161	ARP2	ARP2	Actr2	x			x	x	x		x						x								x
Q99JY9	ARP3	ARP3	Actr3	x							x														x
Q641P0	ARP3B	ARP3B	Actr3b	x							x														x
Q9D898	ARP5L	ARP5L	Arpc5l	x							x														x
Q9CVB6	ARPC2	ARPC2	Arpc2	x				x			x			x											x
H7BWZ3	H7BWZ3	ARPC3	Arpc3	x							x			x											x
P59999	ARPC4	ARPC4	Arpc4	x							x														x
Q9CPW4	ARPC5	ARPC5	Arpc5	x				x			x	x					x							x	x
Q9WV54	ASAH1	ASAH1	Asah1	x		x	x	x	x	x															x
Q8C0M9	ASGL1	ASGL1	Asrgl1	x						x				x					x						x
Q8VDN2	AT1A1	AT1A1	Atp1a1	x							x														x
Q6PIE5	AT1A2	AT1A2	Atp1a2	x			x				x														x
A0A0G2JGX4	A0A0G2JGX4	AT1A3	Atp1a3	x			x				x														x
P14094	AT1B1	AT1B1	Atp1b1	x							x														x
P14231	AT1B2	AT1B2	Atp1b2	x							x														x
P97370	AT1B3	AT1B3	Atp1b3	x							x													x	x
O55143	AT2A2	AT2A2	Atp2a2	x							x														x
G5E829	AT2B1	AT2B1	Atp2b1	x				x			x													x	x
S4R1C4	S4R1C4	AT2B2	Atp2b2	x							x														x
Q9CQQ7	AT5F1	AT5F1	Atp5pb	x	MIM								x												x
A0A0M3HEP7	A0A0M3HEP7	AT8A1	Atp8a1	x			x	x	x		x	x					x								x
E9PV44	E9PV44	ATIF1	Atpif1	x	Matrix					x															x
Q8BH66	ATLA1	ATLA1	Atl1	x							x														x
P56382	ATP5E	ATP5E	Atp5f1e	x																					x
Q9DCX2	ATP5H	ATP5H	Atp5pd	x									x												x
Q06185	ATP5I	ATP5I	Atp5me	x									x												x
P97450	ATP5J	ATP5J	Atp5pf										x												x
Q9CPQ8	ATP5L	ATP5L	Atp5mg	x									x												x
A0A1Y7VLP0	A0A1Y7VLP0	ATP68	Atp5mpl		MIM																				x
P03930	ATP8	ATP8	Mtatp8																						x
Q03265	ATPA	ATPA	Atp5f1a	x									x												x
P56480	ATPB	ATPB	Atp5f1b	x									x												x
Q9D3D9	ATPD	ATPD	Atp5f1d	x																					x
A2AKU9	A2AKU9	ATPG	Atp5c1	x	MIM					x															x
P56135	ATPK	ATPK	Atp5mf	x									x		x										x
Q78IK2	ATPMK	ATPMK	Atp5mk										x												x
Q9DB20	ATPO	ATPO	Atp5po	x									x												x
A0A0R4J023	A0A0R4J023	AUHM	Auh	x	Matrix					x															x
Q80TZ3	AUXI	AUXI	Dnajc6	x							x			x			x							x	x
E9PYH2	E9PYH2	BACH	Acot7	x	Matrix					x				x			x								x
B1AZ46	B1AZ46	BAIP2	Baiap2	x							x						x							x	x
P18572	BASI	BASI	Bsg	x							x	x													x
Q91XV3	BASP1	BASP1	Basp1	x			x				x													x	x
F7BNZ5	F7BNZ5	BCAS1	Bcas1	x							x	x													x
Q8CBC8	Q8CBC8	BCAT1	Bcat1	x						x															x
Q9CZP5	BCS1	BCS1	Bcs1l	x	MIM					x															x
Q80XN0	BDH	BDH	Bdh1	x	MIM					x			x												x
O08539	BIN1	BIN1	Bin1	x							x						x								x
P20029	BIP	BIP	Hspa5								x						x								x
Q9JM96	BORG4	BORG4	Cdc42ep4	x						x									x		x			x	x
Q8R164	BPHL	BPHL	Bphl	x	Matrix		x			x			x												x
A0A1B0GRV0	A0A1B0GRV0	BPNT1	Bpnt1	x						x				x											x
Q91VR8	BRK1	BRK1	Brk1								x			x										x	x
O88737	BSN	BSN	Bsn	x							x														x
Q8R5L1	Q8R5L1	C1QBP	C1qbp	x	Matrix					x			x											x	x
Q3V3R1	C1TM	C1TM	Mthfd1l	x	Matrix					x			x												x
Q80X80	C2C2L	C2C2L	C2cd2l	x							x													x	x
Q9CZB0	C560	C560	Sdhc	x	MIM					x															x
E9Q1X8	E9Q1X8	CA2D1	Cacna2d1	x							x														x
E9Q683	E9Q683	CA2D2	Cacna2d2	x							x	x													x
Q9Z1L5	CA2D3	CA2D3	Cacna2d3	x							x			x											x
A0A087WS83	A0A087WS83	CAC1E	Cacna1e	x						x							x				x			x	x
H7BX88	H7BX88	CACP	Crat	x	MIM		x			x							x					x			x
Q9WTR5	CAD13	CAD13	Cdh13	x							x													x	x
D3YYT0	D3YYT0	CADH2	Cdh2	x			x			x														x	x
Q8R5M8	CADM1	CADM1	Cadm1	x			x				x													x	x
G3UZM4	G3UZM4	CADM2	Cadm2	x							x														x
K4DI58	K4DI58	CADM3	Cadm3	x							x														x
Q8R464	CADM4	CADM4	Cadm4	x							x			x	x										x
P00920	CAH2	CAH2	Ca2	x				x			x														x
P12658	CALB1	CALB1	Calb1	x						x		x													x
Q08331	CALB2	CALB2	Calb2	x							x						x								x
P0DP26	CALM1	CALM1	Calm1	x							x						x								x
P14211	CALR	CALR	Calr	x		x					x												x		x
P35564	CALX	CALX	Canx	x							x												x		x
Q3UHL1	CAMKV	CAMKV	Camkv	x							x			x					x						x
O08529	CAN2	CAN2	Capn2	x		x			x	x							x								x
Q63810	CANB1	CANB1	Ppp3r1	x							x						x							x	x
Q6ZQ38	CAND1	CAND1	Cand1	x						x				x			x					x			x
P40124	CAP1	CAP1	Cap1	x				x	x	x							x								x
Q9CYT6	CAP2	CAP2	Cap2	x						x				x			x							x	x
Q80TJ1	CAPS1	CAPS1	Cadps	x							x	x													x
P47757	CAPZB	CAPZB	Capzb	x				x			x	x		x			x								x
P47754	CAZA2	CAZA2	Capza2	x				x			x						x								x
Q00493	CBPE	CBPE	Cpe	x			x				x	x						x							x
P48758	CBR1	CBR1	Cbr1	x						x				x			x								x
Q91VT4	CBR4	CBR4	Cbr4	x	Matrix					x															x
D3YVV1	D3YVV1	CC50A	Tmem30a	x			x		x		x														x
S4R2F1	S4R2F1	CCG8	Cacng8	x							x														x
E9Q4G8	E9Q4G8	CD166	Alcam	x							x	x													x
A0A2R8VK70	A0A2R8VK70	CD47	Cd47	x				x			x	x												x	x
P60766	CDC42	CDC42	Cdc42	x			x				x								x						x
A2AMQ5	A2AMQ5	CDS2	Cds2	x							x												x		x
Q9JKC6	CEND	CEND	Cend1	x							x		x												x
Q64433	CH10	CH10	Hspe1	x	Matrix					x															x
P63038	CH60	CH60	Hspd1	x	Matrix					x			x												x
Q9D8B3	CHM4B	CHM4B	Chmp4b	x			x	x	x																x
Q91WS0	CISD1	CISD1	Cisd1	x	MOM					x			x												x
Q9CZU6	CISY	CISY	Cs	x	Matrix						x		x												x
A0A0R4J0K2	A0A0R4J0K2	CKAP5	Ckap5	x							x					x		x						x	x
F7DCH5	F7DCH5	CLAP2	Clasp2	x							x						x					x			x
B1AWD8	B1AWD8	CLCA	Clta	x				x	x		x	x													x
Q6IRU5	CLCB	CLCB	Cltb	x						x		x					x							x	x
Q60771	CLD11	CLD11	Cldn11	x							x	x												x	x
Q5SXR6	Q5SXR6	CLH1	Cltc	x		x		x	x		x	x					x		x						x
Q9QYB1	CLIC4	CLIC4	Clic4	x						x								x						x	x
Q8R4N0	CLYBL	CLYBL	Clybl	x	Matrix					x															x
Q3U5Q7	CMPK2	CMPK2	Cmpk2	x	Matrix						x		x	x											x
P16330	CN37	CN37	Cnp	x				x			x													x	x
O88507	CNTFR	CNTFR	Cntfr	x							x														x
P12960	CNTN1	CNTN1	Cntn1	x							x														x
Q61330	CNTN2	CNTN2	Cntn2	x						x															x
O54991	CNTP1	CNTP1	Cntnap1	x							x			x											x
E9QNF7	E9QNF7	CNTP2	Cntnap2	x																					x
P18760	COF1	COF1	Cfl1	x				x			x													x	x
Q8BMS4	COQ3	COQ3	Coq3	x	MIM					x			x	x											x
A0A140LIF0	A0A140LIF0	COQ7	Coq7	x	MIM					x				x										x	x
F6SFF5	F6SFF5	COQ9	Coq9	x	MIM					x			x				x								x
O89053	COR1A	COR1A	Coro1a	x			x	x	x	x							x								x
Q9WUM4	COR1C	COR1C	Coro1c	x				x			x														x
P00405	COX2	COX2	Mtco2	x						x															x
P00416	COX3	COX3	mt-Co3		MIM																				x
P19783	COX41	COX41	Cox4i1	x	MIM					x			x												x
P12787	COX5A	COX5A	Cox5a	x	MIM					x															x
Q9CPQ1	COX6C	COX6C	Cox6c	x	MIM								x												x
P84086	CPLX2	CPLX2	Cplx2	x					x		x	x													x
Q3UYN2	Q3UYN2	CPNE6	Cpne6	x							x	x										x			x
P52825	CPT2	CPT2	Cpt2	x	MIM					x			x	x		x									x
A0A1L1SRG5	A0A1L1SRG5	CRYAB	Cryab	x													x							x	x
Q60737	CSK21	CSK21	Csnk2a1	x				x			x			x											x
Q6P9K8	CSKI1	CSKI1	Caskin1	x							x			x			x								x
O70589	CSKP	CSKP	Cask	x							x			x			x								x
G3XA35	G3XA35	CSPG2	Vcan	x					x		x	x													x
Q71M36	CSPG5	CSPG5	Cspg5	x					x		x		x	x											x
P97315	CSRP1	CSRP1	Csrp1	x						x															x
A0A0J9YU62	A0A0J9YU62	CTBP1	Ctbp1	x						x				x											x
Q61301	CTNA2	CTNA2	Ctnna2	x				x			x														x
Q02248	CTNB1	CTNB1	Ctnnb1	x				x			x													x	x
B7ZNF6	B7ZNF6	CTND2	Ctnnd2	x							x			x			x							x	x
P56391	CX6B1	CX6B1	Cox6b1	x	MIM					x			x												x
P48771	CX7A2	CX7A2	Cox7a2	x	MIM					x															x
P23242	CXA1	CXA1	Gja1	x					x		x	x		x										x	x
Q9D0M3	CY1	CY1	Cyc1	x	MIM					x			x												x
P62897	CYC	CYC	Cycs	x	IMS								x												x
Q5SQX6	CYFP2	CYFP2	Cyfip2	x							x						x						x	x	x
Q5M8N4	D39U1	D39U1	Sdr39u1	x	unknown					x				x			x								x
Q8R1Q8	DC1L1	DC1L1	Dync1li1	x					x		x						x	x							x
P48318	DCE1	DCE1	Gad1	x							x	x					x							x	x
A0A0G2JGQ6	A0A0G2JGQ6	DCLK1	Dclk1	x							x			x			x								x
E9Q3M3	E9Q3M3	DCTN1	Dctn1	x					x		x								x						x
Q99KJ8	DCTN2	DCTN2	Dctn2	x						x							x	x							x
Q9CWS0	DDAH1	DDAH1	Ddah1	x							x					x	x							x	x
Q9CQ62	DECR	DECR	Decr1	x	Matrix					x			x				x								x
Q9R0P5	DEST	DEST	Dstn	x							x													x	x
O70503	DHB12	DHB12	Hsd17b12	x							x														x
P51660	DHB4	DHB4	Hsd17b4	x	unknown		x			x		x													x
P50171	DHB8	DHB8	Hsd17b8	x						x															x
P26443	DHE3	DHE3	Glud1	x	Matrix						x		x												x
A0A0G2JGJ1	A0A0G2JGJ1	DHPR	Qdpr	x	Matrix					x			x												x
A0A2I3BRG8	A0A2I3BRG8	DHRS4	Dhrs4	x	Matrix		x			x		x			x										x
Q5PR73	DIRA2	DIRA2	Diras2	x							x														x
Q5U458	DJC11	DJC11	Dnajc11	x	MOM					x			x												x
O08749	DLDH	DLDH	Dld	x	Matrix		x				x		x	x											x
E9Q9H0	E9Q9H0	DLG1	Dlg1	x							x	x												x	x
A0A338P6J0	A0A338P6J0	DLG2	Dlg2	x							x	x												x	x
A2BEE9	A2BEE9	DLG3	Dlg3	x							x			x		x									x
A0A338P6E5	A0A338P6E5	DLG4	Dlg4	x						x															x
Q9D415	DLGP1	DLGP1	Dlgap1	x						x		x					x								x
Q0VF59	Q0VF59	DLGP2	Dlgap2	x						x															x
B1AS06	B1AS06	DLGP3	Dlgap3	x						x									x				x	x	x
B1AZP2	DLGP4	DLGP4	Dlgap4	x						x				x							x				x
Q8BPN8	DMXL2	DMXL2	Dmxl2	x							x														x
P63037	DNJA1	DNJA1	Dnaja1	x							x						x		x						x
Q9QYJ0	DNJA2	DNJA2	Dnaja2	x						x						x	x			x					x
P60904	DNJC5	DNJC5	Dnajc5	x		x	x	x	x		x	x										x		x	x
Q8K1M6	DNM1L	DNM1L	Dnm1l	x	MOM						x	x					x								x
Q6NXK7	DPP10	DPP10	Dpp10	x							x														x
E9PWX1	E9PWX1	DPP6	Dpp6	x							x														x
P97427	DPYL1	DPYL1	Crmp1	x							x						x	x							x
O08553	DPYL2	DPYL2	Dpysl2	x							x						x							x	x
D3Z360	D3Z360	DPYL4	Dpysl4	x							x	x	x												x
Q9EQF6	DPYL5	DPYL5	Dpysl5	x							x			x			x								x
Q9QXS6	DREB	DREB	Dbn1	x						x											x			x	x
Z4YKT6	Z4YKT6	DRS7B	Dhrs7b	x	Membrane		x			x							x							x	x
Q9JHU4	DYHC1	DYHC1	Dync1h1	x					x		x						x	x							x
P63168	DYL1	DYL1	Dynll1	x							x			x			x								x
P39053	DYN1	DYN1	Dnm1	x							x														x
E9QLL2	E9QLL2	DYN3	Dnm3	x							x											x			x
A2AUK5	A2AUK5	E41L1	Epb41l1	x							x													x	x
Q80UE4	Q80UE4	E41L2	Epb41l2	x							x			x										x	x
P56564	EAA1	EAA1	Slc1a3	x							x	x				x									x
P43006	EAA2	EAA2	Slc1a2	x			x				x														x
Q8BMS1	ECHA	ECHA	Hadha	x	MIM					x			x												x
Q99JY0	ECHB	ECHB	Hadhb	x	MIM					x			x												x
Q8BH95	ECHM	ECHM	Echs1	x	Matrix						x		x												x
P42125	ECI1	ECI1	Eci1	x	Matrix					x			x												x
P10126	EF1A1	EF1A1	Eef1a1	x					x								x								x
P62631	EF1A2	EF1A2	Eef1a2	x					x		x					x	x								x
Q9D8N0	EF1G	EF1G	Eef1g	x						x							x					x			x
P58252	EF2	EF2	Eef2	x		x					x						x							x	x
Q8K0D5	EFGM	EFGM	Gfm1	x	Matrix					x			x	x											x
A0A1W2P7T9	A0A1W2P7T9	EFR3B	Efr3b	x							x						x				x			x	x
Q8BFR5	EFTU	EFTU	Tufm	x	Matrix					x			x												x
Q9WVK4	EHD1	EHD1	Ehd1	x							x													x	x
Q8C522	ENDD1	ENDD1	Endod1	x							x				x										x
P17182	ENOA	ENOA	Eno1	x				x									x							x	x
P17183	ENOG	ENOG	Eno2	x							x						x							x	x
P08113	ENPL	ENPL	Hsp90b1	x							x												x		x
O55026	ENTP2	ENTP2	Entpd2	x							x														x
A0A1D5RLS1	A0A1D5RLS1	EP15R	Eps15l1	x							x	x													x
Q3UHT7	Q3UHT7	ERC2	Erc2	x						x															x
Q5EBJ4	ERMIN	ERMIN	Ermn	x						x							x							x	x
P57759	ERP29	ERP29	Erp29	x							x			x					x						x
Q99LC5	ETFA	ETFA	Etfa	x	Matrix					x			x												x
Q9DCW4	ETFB	ETFB	Etfb	x	Matrix					x			x												x
Q6PF96	Q6PF96	ETFD	Etfdh	x	MIM					x															x
Q9DCM0	ETHE1	ETHE1	Ethe1	x	Matrix					x			x												x
Q8C163	EXOG	EXOG	Exog	x	MIM					x			x												x
Q9D6U8	F162A	F162A	Fam162a	x	MIM					x			x												x
Q05816	FABP5	FABP5	Fabp5	x					x		x						x							x	x
P11404	FABPH	FABPH	Fabp3	x						x											x	x		x	x
F8VPU2	FARP1	FARP1	Farp1	x							x						x								x
P19096	FAS	FAS	Fasn	x	IMS		x	x			x			x			x							x	x
Q80UW2	FBX2	FBX2	Fbxo2	x						x				x			x								x
Q6NS60	FBX41	FBX41	Fbxo41	x						x				x			x							x	x
Q9CQ92	FIS1	FIS1	Fis1	x	MOM						x		x												x
P26883	FKB1A	FKB1A	Fkbp1a	x							x														x
O08917	FLOT1	FLOT1	Flot1	x		x	x		x		x	x										x		x	x
Q5SS83	Q5SS83	FLOT2	Flot2	x			x				x	x												x	x
Q61553	FSCN1	FSCN1	Fscn1	x							x						x							x	x
P97807	FUMH	FUMH	Fh	x							x		x												x
Q9D6K8	FUND2	FUND2	Fundc2	x	MOM					x															x
S4R1W8	S4R1W8	G3P	Gapdh	x				x			x	x			x		x							x	x
P06745	G6PI	G6PI	Gpi	x				x			x						x							x	x
Q9WV18	GABR1	GABR1	Gabbr1	x							x							x							x
Q80T41	GABR2	GABR2	Gabbr2	x							x														x
P61922	GABT	GABT	Abat	x	Matrix					x			x												x
Q9D172	GAL3A	GAL3A	Gatd3										x					x							x
Q9CZD3	GARS	GARS	Gars1	x													x								x
P62874	GBB1	GBB1	Gnb1	x		x			x		x											x		x	x
P62880	GBB2	GBB2	Gnb2	x		x			x		x													x	x
P29387	GBB4	GBB4	Gnb4			x			x		x													x	x
A0A0N4SVT3	A0A0N4SVT3	GBG12	Gng12	x							x		x												x
P63213	GBG2	GBG2	Gng2					x			x	x												x	x
P62812	GBRA1	GBRA1	Gabra1	x							x			x										x	x
P63137	GBRB2	GBRB2	Gabrb2	x						x															x
F6ZYH6	F6ZYH6	GBRB3	Gabrb3	x						x															x
A0A0A0MQ68	A0A0A0MQ68	GCDH	Gcdh	x	Matrix		x			x			x												x
Q3USC7	Q3USC7	GD1L1	Gdap1l1	x						x													x		x
O88741	GDAP1	GDAP1	Gdap1	x	MOM					x			x				x								x
P50396	GDIA	GDIA	Gdi1	x				x			x						x							x	x
Q61598	GDIB	GDIB	Gdi2	x				x	x		x						x							x	x
Q99PT1	GDIR1	GDIR1	Arhgdia	x				x		x							x								x
E9Q912	GDS1	GDS1	Rap1gds1							x							x								x
A0JNY3	A0JNY3	GEPH	Gphn	x			x			x		x					x								x
P03995	GFAP	GFAP	Gfap	x					x	x										x					x
Q9D6M3	GHC1	GHC1	Slc25a22	x	MIM								x	x											x
Q9DB41	GHC2	GHC2	Slc25a18	x	MIM					x			x	x											x
Q5F258	Q5F258	GIT1	Git1	x							x		x				x				x				x
P15105	GLNA	GLNA	Glul	x			x				x		x				x							x	x
Q9CPV4	GLOD4	GLOD4	Glod4	x	Matrix					x							x								x
Q64516	GLPK	GLPK	Gk	x			x			x															x
Q80Y14	GLRX5	GLRX5	Glrx5	x	Matrix					x			x												x
D3Z7P3	GLSK	GLSK	Gls	x	MIM					x			x												x
O08795	GLU2B	GLU2B	Prkcsh	x			x				x												x		x
Q9CZN7	GLYM	GLYM	Shmt2		Matrix					x			x						x						x
P21278	GNA11	GNA11	Gna11	x		x		x	x		x														x
P27601	GNA13	GNA13	Gna13	x				x			x						x								x
B2RSH2	GNAI1	GNAI1	Gnai1	x					x		x			x		x		x							x
P08752	GNAI2	GNAI2	Gnai2	x				x			x			x			x							x	x
Q66L47	Q66L47	GNAL	Gnal	x						x				x			x								x
P18872	GNAO	GNAO	Gnao1	x							x														x
P21279	GNAQ	GNAQ	Gnaq	x		x		x	x		x			x			x							x	x
O70443	GNAZ	GNAZ	Gnaz	x							x	x													x
P62881	GNB5	GNB5	Gnb5	x							x			x			x	x							x
Q3ULJ0	GPD1L	GPD1L	Gpd1l	x							x														x
P13707	GPDA	GPDA	Gpd1	x							x														x
Q64521	GPDM	GPDM	Gpd2	x	MIM		x			x			x												x
P35802	GPM6A	GPM6A	Gpm6a	x							x														x
A2AEG6	A2AEG6	GPM6B	Gpm6b	x							x														x
O70325	GPX4	GPX4	Gpx4		MIM						x		x	x											x
Q3UNH4	GRIN1	GRIN1	Gprin1	x								x												x	x
P97772	GRM1	GRM1	Grm1	x							x	x													x
Q14BI2	GRM2	GRM2	Grm2	x							x														x
Q9QYS2	GRM3	GRM3	Grm3	x							x														x
Q3UVX5	GRM5	GRM5	Grm5	x							x														x
P10649	GSTM1	GSTM1	Gstm1	x			x				x						x		x						x
P19157	GSTP1	GSTP1	Gstp1	x						x			x				x								x
P17809	GTR1	GTR1	Slc2a1	x			x		x		x													x	x
P32037	GTR3	GTR3	Slc2a3	x							x													x	x
Q9R111	GUAD	GUAD	Gda	x			x			x				x											x
P62806	H4	H4	H4c16	x										x											x
Q8K2C9	HACD3	HACD3	Hacd3	x			x				x												x		x
Q91VB8	Q91VB8	HBA	Hba-a1	x																					x
A2AFQ2	A2AFQ2	HCD2	Hsd17b10	x	Matrix		x			x															x
Q61425	HCDH	HCDH	Hadh	x	Matrix						x		x												x
Q640R3	HECAM	HECAM	Hepacam	x							x	x													x
A0A494BAI5	A0A494BAI5	HEMH	Fech	x	MIM					x															x
Q8QZS1	HIBCH	HIBCH	Hibch	x	Matrix					x			x												x
Q9D0S9	HINT2	HINT2	Hint2	x	Matrix					x			x												x
F8WH96	F8WH96	HINT3	Hint3	x	unknown					x			x			x	x								x
P38060	HMGCL	HMGCL	Hmgcl	x	Matrix					x															x
D3YX62	D3YX62	HMOX2	Hmox2	x							x	x					x								x
B2M1R6	B2M1R6	HNRPK	Hnrnpk	x							x			x											x
Q9Z2Y3	HOME1	HOME1	Homer1	x			x			x							x								x
A0A140LHR9	A0A140LHR9	HOME2	Homer2	x			x			x							x								x
P84075	HPCA	HPCA	Hpca	x							x														x
P62748	HPCL1	HPCL1	Hpcal1	x							x														x
Q9QUP5	HPLN1	HPLN1	Hapln1	x			x			x		x													x
Q9ESM3	HPLN2	HPLN2	Hapln2	x																					x
Q61699	HS105	HS105	Hsph1	x						x				x			x								x
Q8K0U4	HS12A	HS12A	Hspa12a	x							x						x					x			x
P48722	HS74L	HS74L	Hspa4l	x						x							x	x							x
P07901	HS90A	HS90A	Hsp90aa1	x				x	x		x						x								x
P11499	HS90B	HS90B	Hsp90ab1	x		x			x		x						x								x
Q8BTX9	HSDL1	HSDL1	Hsdl1	x	unknown					x		x	x							x					x
Q3U2G2	Q3U2G2	HSP74	Hspa4	x							x			x			x								x
P63017	HSP7C	HSP7C	Hspa8	x		x		x	x		x	x		x											x
G3UVV4	G3UVV4	HXK1	Hk1	x							x		x												x
Q9JKR6	HYOU1	HYOU1	Hyou1	x							x														x
Q60625	ICAM5	ICAM5	Icam5	x							x														x
Q9D6R2	IDH3A	IDH3A	Idh3a	x	Matrix					x			x												x
P54071	IDHP	IDHP	Idh2	x	Matrix						x		x												x
A0A0A0MQM0	A0A0A0MQM0	IF5A1	Eif5a	x										x			x							x	x
G3UYZ1	G3UYZ1	IGSF8	Igsf8	x							x	x													x
P70168	IMB1	IMB1	Kpnb1	x				x		x				x	x		x								x
Q924B0	Q924B0	IMPA1	Impa1	x						x															x
D3YUD3	D3YUD3	INP4A	Inpp4a	x							x			x	x										x
Q91VM9	IPYR2	IPYR2	Ppa2	x	Matrix					x			x												x
A0A1D5RM83	A0A1D5RM83	IQEC1	Iqsec1	x							x	x				x									x
A0A1Y7VK19	A0A1Y7VK19	ISCA2	Isca2	x	Matrix					x															x
P11881	ITPR1	ITPR1	Itpr1	x							x	x													x
Q9JHI5	IVD	IVD	Ivd	x	Matrix					x			x	x											x
Q9R0Y5	KAD1	KAD1	Ak1	x							x						x								x
Q9WTP7	KAD3	KAD3	Ak3	x	Matrix					x			x												x
Q9WUR9	KAD4	KAD4	Ak4	x	Matrix					x			x												x
A0A0A6YX73	A0A0A6YX73	KAP2	Prkar2a	x				x			x														x
P31324	KAP3	KAP3	Prkar2b	x							x		x												x
A0A571BGH0	A0A571BGH0	KCAB2	Kcnab2	x							x														x
P11798	KCC2A	KCC2A	Camk2a	x							x						x							x	x
P28652	KCC2B	KCC2B	Camk2b	x							x						x							x	x
Q923T9	KCC2G	KCC2G	Camk2g	x							x						x							x	x
Q9JM63	KCJ10	KCJ10	Kcnj10	x						x															x
A0A286YD35	A0A286YD35	KCMA1	Kcnma1	x						x															x
P63141	KCNA2	KCNA2	Kcna2							x															x
Q04447	KCRB	KCRB	Ckb	x							x						x								x
P30275	KCRU	KCRU	Ckmt1	x	MIM																				x
A0A0R4J093	A0A0R4J093	KCY	Cmpk1	x						x				x											x
Q9CQX8	KGD4	KGD4	Mrps36		Matrix						x		x												x
E0CZ72	E0CZ72	KIF2A	Kif2a	x		x			x		x			x		x		x							x
Q61768	KINH	KINH	Kif5b	x					x		x						x	x							x
P68404	KPCB	KPCB	Prkcb	x							x			x			x								x
P63318	KPCG	KPCG	Prkcg	x							x														x
P52480	KPYM	KPYM	Pkm	x				x			x						x								x
A2AFG8	A2AFG8	L1CAM	L1cam	x							x			x										x	x
Q9EP89	LACTB	LACTB	Lactb	x	IMS								x												x
P11438	LAMP1	LAMP1	Lamp1	x		x	x	x	x		x														x
F6RJV6	F6RJV6	LANC2	Lancl2	x							x			x			x								x
Q61792	LASP1	LASP1	Lasp1	x						x							x				x			x	x
Q9Z127	LAT1	LAT1	Slc7a5	x					x	x		x					x							x	x
A0A1B0GSX0	A0A1B0GSX0	LDHA	Ldha	x							x	x					x								x
A0A6I8MX27	A0A6I8MX27	LDHB	Ldhb	x	unknown						x						x								x
Q9Z2I0	LETM1	LETM1	Letm1	x	MIM					x			x												x
A0A0G2JGB7	A0A0G2JGB7	LGI1	Lgi1	x							x														x
Q8K406	LGI3	LGI3	Lgi3	x							x														x
A9DA50	A9DA50	LIGO1	Lingo1	x							x													x	x
Q8JZS0	LIN7A	LIN7A	Lin7a	x							x														x
P60469	LIPA3	LIPA3	Ppfia3	x						x		x				x									x
P63005	LIS1	LIS1	Pafah1b1	x						x								x							x
Q8CGK3	LONM	LONM	Lonp1	x	Matrix					x			x	x											x
Q6PB66	LPPRC	LPPRC	Lrpprc	x	Matrix					x			x												x
A0A0R4J0I9	A0A0R4J0I9	LRP1	Lrp1	x		x	x	x	x		x	x		x											x
A0A571BEA5	A0A571BEA5	LRRC7	Lrrc7	x						x				x			x	x						x	x
A0A087WP70	A0A087WP70	LSAMP	Lsamp	x							x						x								x
Q924L1	LTMD1	LTMD1	Letmd1		Membrane					x			x	x		x									x
Q8K356	Q8K356	LY6H	Ly6h	x							x														x
Q9CR62	M2OM	M2OM	Slc25a11	x	MIM					x															x
A0A1Y7VJZ2	A0A1Y7VJZ2	MAAI	Gstz1	x	Matrix					x				x			x								x
Q922B1	MACD1	MACD1	Macrod1		Matrix					x				x											x
B1ARU4	B1ARU4	MACF1	Macf1	x						x											x			x	x
P20917	MAG	MAG	Mag	x							x														x
Q99KE1	MAOM	MAOM	Me2	x	Matrix					x			x												x
Q8BMF3	MAON	MAON	Me3	x	Matrix					x															x
A2ARP8	A2ARP8	MAP1A	Map1a	x							x						x								x
P14873	MAP1B	MAP1B	Map1b	x							x						x								x
P27546	MAP4	MAP4	Map4	x							x						x		x					x	x
Q7TSJ2	MAP6	MAP6	Map6	x					x		x													x	x
P26645	MARCS	MARCS	Marcks	x				x			x			x			x						x	x	x
Q6PER3	MARE3	MARE3	Mapre3	x						x															x
A0A0R4J1H0	A0A0R4J1H0	MARH5	Marchf5	x	MOM		x						x												x
A0A498WGS3	A0A498WGS3	MBP	Mbp	x							x													x	x
Q9Z2Z6	MCAT	MCAT	Slc25a20	x	MIM					x			x				x								x
Q99MR8	MCCA	MCCA	Mccc1	x	Matrix					x			x												x
Q3ULD5	MCCB	MCCB	Mccc2	x	Matrix					x			x												x
Q3UMR5	MCU	MCU	Mcu	x	MIM					x			x												x
P14152	MDHC	MDHC	Mdh1	x				x			x						x	x							x
P08249	MDHM	MDHM	Mdh2	x	Matrix						x		x												x
Q6PCP5	MFF	MFF	Mff	x	MOM						x		x												x
Q80U63	MFN2	MFN2	Mfn2	x	MOM								x												x
Q9CPU4	MGST3	MGST3	Mgst3	x	MOM					x				x											x
Q9CRB9	MIC19	MIC19	Chchd3	x	MIM					x			x												x
E9Q4M4	E9Q4M4	MIC25	Chchd6	x	MIM					x			x												x
Q9DCZ4	MIC26	MIC26	Apoo	x	MIM					x			x				x								x
Q78IK4	MIC27	MIC27	Apool	x	MIM					x			x												x
Q8CAQ8	MIC60	MIC60	Immt	x	MIM					x			x												x
Q9CTY5	MICU3	MICU3	Micu3	x	MIM					x															x
P34884	MIF	MIF	Mif	x							x			x			x								x
Q8BG51	MIRO1	MIRO1	Rhot1	x	MOM					x															x
Q3URS9	MITOK	MITOK	Ccdc51		MIM					x			x	x				x							x
Q9CXJ4	MITOS	MITOS	Abcb8		MIM					x			x	x											x
P63085	MK01	MK01	Mapk1	x					x		x			x			x								x
Q3THE2	ML12B	ML12B	Myl12b	x				x		x															x
Q9EQ20	MMSA	MMSA	Aldh6a1	x	MIM					x			x												x
Q3UY21	Q3UY21	MOG	Mog	x							x														x
P31938	MP2K1	MP2K1	Map2k1	x							x						x							x	x
P63030	MPC1	MPC1	Mpc1	x	MIM					x			x												x
Q9D023	MPC2	MPC2	Mpc2	x	MIM					x															x
Q9WV34	MPP2	MPP2	Mpp2	x							x														x
A0A668KLC6	A0A668KLC6	MTAP2	Map2	x							x						x							x	x
Q791T5	MTCH1	MTCH1	Mtch1	x	MOM					x															x
Q791V5	MTCH2	MTCH2	Mtch2	x	MOM						x		x												x
A0A6I8MWZ8	A0A6I8MWZ8	MTX1	Mtx1	x	MOM					x			x												x
O88441	MTX2	MTX2	Mtx2	x	MOM					x			x			x									x
P16332	MUTA	MUTA	Mmut	x	Matrix								x				x								x
B2RRE2	B2RRE2	MY18A	Myo18a	x						x															x
Q5SV64	Q5SV64	MYH10	Myh10	x						x			x				x				x				x
K3W4R2	K3W4R2	MYH14	Myh14	x							x			x											x
A0A1W2P6F6	A0A1W2P6F6	MYL6	Myl6	x				x		x															x
F6Z2S4	F6Z2S4	MYO5A	Myo5a	x					x		x							x			x				x
P60202	MYPR	MYPR	Plp1	x							x														x
A0A3Q4EBU5	A0A3Q4EBU5	NAC1	Slc8a1	x							x			x										x	x
Q8K596	NAC2	NAC2	Slc8a2	x							x														x
Q9DB73	NB5R1	NB5R1	Cyb5r1	x						x			x				x								x
Q9DCN2	NB5R3	NB5R3	Cyb5r3	x	MOM				x		x												x		x
E9QB01	E9QB01	NCAM1	Ncam1	x							x						x							x	x
O35136	NCAM2	NCAM2	Ncam2	x							x			x										x	x
Q9Z0E0	NCDN	NCDN	Ncdn	x						x							x								x
A2AS98	A2AS98	NCKP1	Nckap1	x				x			x						x								x
P15532	NDKA	NDKA	Nme1	x						x							x								x
Q62433	NDRG1	NDRG1	Ndrg1	x						x							x		x						x
Q9QYG0	NDRG2	NDRG2	Ndrg2	x			x	x			x			x			x	x							x
Q9QYF9	NDRG3	NDRG3	Ndrg3	x							x	x					x								x
Q9CQ75	NDUA2	NDUA2	Ndufa2	x	MIM					x															x
Q9CQ91	NDUA3	NDUA3	Ndufa3		MIM																				x
Q62425	NDUA4	NDUA4	Ndufa4	x	MIM					x			x												x
Q9CPP6	NDUA5	NDUA5	Ndufa5	x	MIM					x															x
Q9CQZ5	NDUA6	NDUA6	Ndufa6	x	MIM					x															x
Q9Z1P6	NDUA7	NDUA7	Ndufa7	x	MIM					x			x												x
Q9DCJ5	NDUA8	NDUA8	Ndufa8	x	MIM					x			x												x
A0A0R3P9C8	A0A0R3P9C8	NDUA9	Ndufa9	x	MIM					x			x	x											x
Q99LC3	NDUAA	NDUAA	Ndufa10	x	MIM					x			x												x
G5E814	G5E814	NDUAB	Ndufa11	x	MIM					x			x												x
Q7TMF3	NDUAC	NDUAC	Ndufa12	x	MIM					x			x				x								x
Q9ERS2	NDUAD	NDUAD	Ndufa13	x	MIM								x												x
Q9CQC7	NDUB4	NDUB4	Ndufb4	x	MIM					x			x	x	x										x
D3Z568	D3Z568	NDUB5	Ndufb5	x	MIM					x			x	x											x
Q3UIU2	NDUB6	NDUB6	Ndufb6	x	MIM					x			x												x
Q9CR61	NDUB7	NDUB7	Ndufb7	x	MIM					x															x
Q9D6J5	NDUB8	NDUB8	Ndufb8	x	MIM					x			x												x
Q9CQJ8	NDUB9	NDUB9	Ndufb9	x	MIM					x			x												x
Q9DCS9	NDUBA	NDUBA	Ndufb10	x	MIM					x															x
O09111	NDUBB	NDUBB	Ndufb11	x	MIM					x			x												x
Q9CQ54	NDUC2	NDUC2	Ndufc2	x	MIM				x	x			x												x
Q91VD9	NDUS1	NDUS1	Ndufs1	x	MIM					x			x												x
Q91WD5	NDUS2	NDUS2	Ndufs2	x	MIM					x			x												x
Q9DCT2	NDUS3	NDUS3	Ndufs3	x	MIM					x			x	x											x
E9QPX3	E9QPX3	NDUS4	Ndufs4	x	MIM					x			x												x
B1ARW4	B1ARW4	NDUS5	Ndufs5	x	MIM					x															x
P52503	NDUS6	NDUS6	Ndufs6	x	MIM																				x
Q9DC70	NDUS7	NDUS7	Ndufs7	x	MIM					x															x
Q8K3J1	NDUS8	NDUS8	Ndufs8	x	MIM					x			x												x
D3YUM1	D3YUM1	NDUV1	Ndufv1	x	MIM					x			x				x								x
Q9D6J6	NDUV2	NDUV2	Ndufv2	x	MIM					x			x	x			x								x
Q8BK30	NDUV3	NDUV3	Ndufv3		MIM					x			x												x
Q6R891	NEB2	NEB2	Ppp1r9b	x						x															x
Q9CR95	NECP1	NECP1	Necap1	x							x	x					x								x
A0A4W9	A0A4W9	NEGR1	Negr1	x							x	x					x				x				x
P06837	NEUM	NEUM	Gap43	x							x													x	x
Q04690	NF1	NF1	Nf1	x							x			x										x	x
Q810U3	NFASC	NFASC	Nfasc	x							x														x
P19246	NFH	NFH	Nefh							x															x
P08551	NFL	NFL	Nefl	x						x				x					x	x					x
A0A0R4J036	A0A0R4J036	NFM	Nefm	x						x										x					x
Q9Z1J3	NFS1	NFS1	Nfs1	x	Matrix					x				x			x								x
P70441	NHRF1	NHRF1	Slc9a3r1	x							x	x						x						x	x
O55125	NIPS1	NIPS1	Nipsnap1	x	Matrix					x															x
Q7TMG8	Q7TMG8	NIPS2	Nipsnap2	x	Matrix								x												x
Q69ZK9	NLGN2	NLGN2	Nlgn2							x			x												x
A2AGI2	A2AGI2	NLGN3	Nlgn3	x						x												x		x	x
G3X9V4	G3X9V4	NMDE2	Grin2b	x						x															x
A2AI14	A2AI14	NMDZ1	Grin1	x					x	x															x
J3QMM7	J3QMM7	NNRD	Naxd	x	MIM					x															x
A3KGE4	A3KGE4	NOE1	Olfm1	x							x			x		x	x								x
Q9CQE1	NPS3B	NPS3B	Nipsnap3b	x	Matrix	x				x															x
P97300	NPTN	NPTN	Nptn	x				x			x													x	x
Q62443	NPTX1	NPTX1	Nptx1	x							x	x										x			x
E9PZM8	E9PZM8	NPTXR	Nptxr	x							x			x			x							x	x
A0A1W2P7Y9	A0A1W2P7Y9	NRCAM	Nrcam	x							x	x		x										x	x
E0CY11	E0CY11	NRX1A	Nrxn1	x							x													x	x
P46460	NSF	NSF	Nsf	x		x	x	x	x		x						x					x			x
Q3UHB1	NT5D3	NT5D3	Nt5dc3	x	Matrix					x			x				x								x
D3Z396	D3Z396	NTRI	Ntm	x							x														x
P03888	NU1M	NU1M	Mtnd1	x						x															x
P03921	NU5M	NU5M	Mtnd5	x						x															x
Q9CRD0	OCAD1	OCAD1	Ociad1	x	MOM					x			x												x
Q9D8W7	OCAD2	OCAD2	Ociad2	x	unknown					x			x												x
P53395	ODB2	ODB2	Dbt	x	Matrix					x			x												x
Q60597	ODO1	ODO1	Ogdh	x	Matrix						x		x												x
Q9D2G2	ODO2	ODO2	Dlst	x	Matrix						x		x	x			x								x
Q8BMF4	ODP2	ODP2	Dlat	x	Matrix						x		x												x
P35486	ODPA	ODPA	Pdha1	x	Matrix						x		x												x
Q9D051	ODPB	ODPB	Pdhb	x	Matrix					x			x	x											x
Q8BKZ9	ODPX	ODPX	Pdhx	x	Matrix					x			x	x										x	x
G3XA53	G3XA53	OMGP	Omg	x							x														x
P58281	OPA1	OPA1	Opa1	x	MIM					x			x	x											x
O54734	OST48	OST48	Ddost	x					x	x													x		x
D3YWF6	D3YWF6	OTUB1	Otub1	x						x							x								x
E9QMY1	E9QMY1	OX2G	Cd200	x							x														x
Q9Z110	P5CS	P5CS	Aldh18a1	x	Matrix					x			x												x
A0A1L1SVK0	A0A1L1SVK0	PA1B2	Pafah1b2	x						x						x	x							x	x
Q61644	PACN1	PACN1	Pacsin1	x							x	x		x											x
Q8K212	PACS1	PACS1	Pacs1	x							x	x												x	x
O88643	PAK1	PAK1	Pak1	x						x							x							x	x
Q9Z0P4	PALM	PALM	Palm	x							x			x										x	x
Q9JLB0	PALS2	PALS2	Pals2					x																	x
Q99LX0	PARK7	PARK7	Park7	x	MOM			x			x			x			x								x
Q91ZA3	PCCA	PCCA	Pcca	x	Matrix					x			x												x
Q99MN9	PCCB	PCCB	Pccb	x	Matrix					x															x
Q9QYX7	PCLO	PCLO	Pclo	x							x			x										x	x
Q9QXV0	PCS1N	PCS1N	Pcsk1n								x	x													x
Q9WU78	PDC6I	PDC6I	Pdcd6ip	x				x		x		x						x							x
A0A1B0GRJ9	A0A1B0GRJ9	PDE2A	Pde2a	x	MIM						x						x								x
P09103	PDIA1	PDIA1	P4hb	x			x				x												x		x
P27773	PDIA3	PDIA3	Pdia3	x							x												x		x
Q3TML0	Q3TML0	PDIA6	Pdia6	x						x							x						x		x
Q8BFP9	PDK1	PDK1	Pdk1	x	Matrix					x															x
Q9JK42	PDK2	PDK2	Pdk2	x	Matrix					x			x	x											x
Q922H2	PDK3	PDK3	Pdk3	x	Matrix					x			x			x									x
A2AJP9	A2AJP9	PDP1	Pdp1	x	MIM					x			x	x			x								x
Q8K183	PDXK	PDXK	Pdxk	x			x							x											x
Q62048	PEA15	PEA15	Pea15	x						x		x		x			x								x
P70296	PEBP1	PEBP1	Pebp1	x				x			x						x							x	x
P12382	PFKAL	PFKAL	Pfkl	x							x		x			x									x
P47857	PFKAM	PFKAM	Pfkm	x							x												x		x
Q8C605	Q8C605	PFKAP	Pfkp	x							x						x								x
Q9DBJ1	PGAM1	PGAM1	Pgam1	x				x			x			x											x
Q61361	PGCB	PGCB	Bcan	x					x	x															x
Q8BWM0	PGES2	PGES2	Ptges2	x	MIM				x	x															x
P09411	PGK1	PGK1	Pgk1	x				x			x														x
A2CEK3	A2CEK3	PGM1	Pgm1	x			x			x							x								x
P67778	PHB1	PHB1	Phb1										x												x
O35129	PHB2	PHB2	Phb2	x	MIM					x			x												x
Q80TL4	PHF24	PHF24	Phf24	x							x														x
E9Q3L2	PI4KA	PI4KA	Pi4ka	x				x			x			x										x	x
F8WHW6	F8WHW6	PI51C	Pip5k1c	x							x			x			x								x
E0CYV0	E0CYV0	PIMT	Pcmt1	x						x							x								x
A2AS45	A2AS45	PKP4	Pkp4	x						x														x	x
Q9Z1B3	PLCB1	PLCB1	Plcb1	x							x													x	x
Q9QXS1	PLEC	PLEC	Plec	x						x							x			x	x				x
Q99JY8	PLPP3	PLPP3	Plpp3	x				x		x												x			x
P62137	PP1A	PP1A	Ppp1ca	x				x			x			x			x							x	x
P63328	PP2BA	PP2BA	Ppp3ca	x							x			x			x								x
P17742	PPIA	PPIA	Ppia	x				x			x														x
P24369	PPIB	PPIB	Ppib	x							x			x									x		x
Q3UYC0	PPM1H	PPM1H	Ppm1h	x							x			x											x
P35700	PRDX1	PRDX1	Prdx1	x									x												x
Q61171	PRDX2	PRDX2	Prdx2	x	unknown			x			x						x								x
P20108	PRDX3	PRDX3	Prdx3	x	Matrix		x			x		x	x												x
P99029	PRDX5	PRDX5	Prdx5	x	Matrix					x			x												x
Q6GT24	Q6GT24	PRDX6	Prdx6	x	unknown	x	x	x	x		x						x							x	x
Q8K411	PREP	PREP	Pitrm1	x	Matrix					x			x				x								x
Q9WU79	PROD	PROD	Prodh	x	MIM							x	x	x											x
P62962	PROF1	PROF1	Pfn1	x							x						x								x
Q9JJV2	PROF2	PROF2	Pfn2	x						x															x
E9PUL5	PRRT2	PRRT2	Prrt2	x							x													x	x
P32848	PRVA	PRVA	Pvalb	x						x				x		x								x	x
Q11011	PSA	PSA	Npepps	x						x							x								x
Q9Z2U1	PSA5	PSA5	Psma5	x			x	x		x							x								x
A0A1D5RLK2	A0A1D5RLK2	PSD3	Psd3	x							x	x		x			x								x
Q14C51	PTCD3	PTCD3	Ptcd3	x	Matrix					x			x												x
Q8BGC4	PTGR3	PTGR3	Ptgr3	x								x		x								x			x
P80560	PTPR2	PTPR2	Ptprn2	x							x	x													x
B2RXS8	B2RXS8	PTPRZ	Ptprz1								x	x					x								x
P42669	PURA	PURA	Pura	x							x														x
Q3U125	Q3U125	PXL2A	Prxl2a		Membrane																				x
G5E8R3	G5E8R3	PYC	Pcx	x	Matrix																				x
Q8CI94	PYGB	PYGB	Pygb	x					x		x						x								x
Q9WUB3	PYGM	PYGM	Pygm	x							x														x
Q9CZ13	QCR1	QCR1	Uqcrc1	x	MIM					x			x												x
Q9DB77	QCR2	QCR2	Uqcrc2	x	MIM					x			x												x
P99028	QCR6	QCR6	Uqcrh		MIM					x															x
Q9CQB4	Q9CQB4	QCR7	Uqcrb	x	MIM					x															x
Q9CQ69	QCR8	QCR8	Uqcrq	x	MIM					x			x												x
Q8R1I1	QCR9	QCR9	Uqcr10	x	MIM					x															x
P61027	RAB10	RAB10	Rab10	x			x				x														x
Q91V41	RAB14	RAB14	Rab14	x		x	x		x		x	x													x
A0A3Q4EI12	A0A3Q4EI12	RAB18	Rab18	x							x														x
Q9D1G1	RAB1B	RAB1B	Rab1b	x			x															x	x		x
P35282	RAB21	RAB21	Rab21	x			x				x														x
P53994	RAB2A	RAB2A	Rab2a	x		x	x		x		x														x
Q6PHN9	RAB35	RAB35	Rab35	x							x														x
P63011	RAB3A	RAB3A	Rab3a	x							x			x			x	x							x
P62823	RAB3C	RAB3C	Rab3c	x							x						x								x
P61021	RAB5B	RAB5B	Rab5b	x			x				x	x													x
P35278	RAB5C	RAB5C	Rab5c	x		x			x		x	x													x
P51150	RAB7A	RAB7A	Rab7a	x		x	x		x		x	x													x
P61028	RAB8B	RAB8B	Rab8b								x														x
P63001	RAC1	RAC1	Rac1	x							x			x		x	x								x
A0A5F8MPB9	A0A5F8MPB9	RADI	Rdx	x							x			x										x	x
P63321	RALA	RALA	Rala	x				x			x										x			x	x
P61226	RAP2B	RAP2B	Rap2b	x			x	x			x														x
Q61411	RASH	RASH	Hras	x				x			x			x			x								x
P46638	RB11B	RB11B	Rab11b	x							x	x						x							x
O35963	RB33B	RB33B	Rab33b	x			x				x														x
Q9ERI6	RDH14	RDH14	Rdh14	x	Membrane	x	x	x	x		x			x			x								x
G3X8R0	G3X8R0	REEP5	Reep5	x							x												x		x
Q80XD3	Q80XD3	RGS7	Rgs7	x							x		x				x								x
A0A0A6YXF6	A0A0A6YXF6	RHOA	Rhoa	x				x			x						x							x	x
P62746	RHOB	RHOB	Rhob	x				x	x		x														x
P52760	RIDA	RIDA	Rida		Matrix																				x
A0A0G2JFB0	A0A0G2JFB0	RIMB2	Rimbp2	x						x				x			x					x			x
F6TZK4	F6TZK4	RIMS1	Rims1	x							x														x
A0A3B2WBL1	A0A3B2WBL1	RL10A	Rpl10a	x							x					x	x						x		x
Q9CXW4	RL11	RL11	Rpl11	x			x				x														x
P35979	RL12	RL12	Rpl12	x							x											x			x
P47963	RL13	RL13	Rpl13	x												x	x						x		x
Q9CR57	RL14	RL14	Rpl14	x							x						x						x		x
Q6ZWZ7	Q6ZWZ7	RL17	Rpl17	x							x						x						x		x
A0A1B0GQU8	A0A1B0GQU8	RL18	Rpl18	x		x					x					x	x						x		x
A2A547	A2A547	RL19	Rpl19	x							x					x	x								x
P67984	RL22	RL22	Rpl22	x										x		x									x
P61358	RL27	RL27	Rpl27			x					x			x		x									x
P14115	RL27A	RL27A	Rpl27a	x													x						x		x
P27659	RL3	RL3	Rpl3	x							x					x	x								x
P47962	RL5	RL5	Rpl5	x							x					x	x						x		x
F6XI62	F6XI62	RL7	Rpl7	x		x					x					x	x						x		x
P12970	RL7A	RL7A	Rpl7a	x		x						x				x									x
P62918	RL8	RL8	Rpl8	x												x	x						x		x
D3YVM5	D3YVM5	RLA0	Rplp0	x							x						x						x		x
P99027	RLA2	RLA2	Rplp2	x										x			x		x						x
A0A1Y7VMN0	A0A1Y7VMN0	ROCK2	Rock2	x							x						x								x
P47708	RP3A	RP3A	Rph3a	x							x														x
Q9EQZ6	RPGF4	RPGF4	Rapgef4	x						x											x				x
Q91YQ5	RPN1	RPN1	Rpn1	x							x						x						x		x
A2ACG7	A2ACG7	RPN2	Rpn2	x							x												x		x
F7AEH4	F7AEH4	RS12	Rps12	x							x	x					x					x			x
D3YUG3	D3YUG3	RS19	Rps19	x							x			x											x
P25444	RS2	RS2	Rps2	x													x						x		x
P62908	RS3	RS3	Rps3	x		x					x						x						x		x
P97351	RS3A	RS3A	Rps3a	x							x					x	x						x		x
P62702	RS4X	RS4X	Rps4x	x		x	x				x														x
D3YYM6	D3YYM6	RS5	Rps5	x			x				x						x						x		x
P62754	RS6	RS6	Rps6	x		x					x						x						x		x
P62242	RS8	RS8	Rps8	x							x						x						x		x
Q9CXW2	RT22	RT22	Mrps22		Matrix					x			x												x
Q8K0T0	RTN1	RTN1	Rtn1	x							x			x									x		x
Q9ES97	RTN3	RTN3	Rtn3	x							x												x		x
Q99P72	RTN4	RTN4	Rtn4	x							x												x		x
A0A0G2JFT8	A0A0G2JFT8	RUFY3	Rufy3	x			x			x							x								x
P50114	S100B	S100B	S100b	x						x		x		x			x								x
A0A0J9YU26	A0A0J9YU26	S12A5	Slc12a5	x							x														x
Q8BH59	S2512	S2512	Slc25a12		MIM					x				x			x								x
Q91VE0	S27A4	S27A4	Slc27a4	x			x				x	x													x
A0A0A6YWF5	A0A0A6YWF5	S38A3	Slc38a3	x			x				x						x		x						x
Q5DTL9	S4A10	S4A10	Slc4a10	x							x														x
E9Q8N8	E9Q8N8	S4A4	Slc4a4	x			x				x														x
P31650	S6A11	S6A11	Slc6a11	x							x	x		x											x
A0A0R4J087	A0A0R4J087	S6A17	Slc6a17	x							x		x												x
A0A5F8MPK9	A0A5F8MPK9	SAC1	Sacm1l	x			x				x			x								x			x
Q80SW1	SAHH2	SAHH2	Ahcyl1	x	MOM						x						x								x
F8WGT1	F8WGT1	SAHH3	Ahcyl2	x							x			x			x								x
Q8BGH2	SAM50	SAM50	Samm50	x	MOM		x			x			x												x
O35874	SATT	SATT	Slc1a4	x							x							x							x
P31648	SC6A1	SC6A1	Slc6a1	x							x														x
Q8C8N2	SCAI	SCAI	Scai	x							x			x	x										x
Q8K021	SCAM1	SCAM1	Scamp1	x			x	x			x	x		x										x	x
Q3UXS0	Q3UXS0	SCAM3	Scamp3	x			x	x			x	x													x
Q9JKD3	SCAM5	SCAM5	Scamp5	x			x				x														x
A2ASZ8	SCMC2	SCMC2	Slc25a25	x	MIM					x		x	x												x
Q6GQS1	SCMC3	SCMC3	Slc25a23	x	MIM					x			x												x
A0A5H1ZRM8	A0A5H1ZRM8	SCN2A	Scn2a								x														x
Q9D0K2	SCOT1	SCOT1	Oxct1	x	Matrix					x			x												x
P32020	SCP2	SCP2	Scp2		MIM					x		x		x											x
Q8R127	SCPDL	SCPDL	Sccpdh	x							x	x													x
Q9CZC8	SCRN1	SCRN1	Scrn1	x						x							x								x
Q8K2B3	SDHA	SDHA	Sdha	x	MIM					x			x			x									x
Q9CQA3	SDHB	SDHB	Sdhb	x	MIM					x			x	x										x	x
Q61753	SERA	SERA	Phgdh	x						x				x			x							x	x
Q99K85	SERC	SERC	Psat1	x						x							x								x
Q99JR1	SFXN1	SFXN1	Sfxn1	x	MIM					x			x												x
Q91V61	SFXN3	SFXN3	Sfxn3	x	MIM					x			x												x
Q925N0	SFXN5	SFXN5	Sfxn5	x	MIM					x			x	x											x
Q8VD37	SGIP1	SGIP1	Sgip1	x							x		x												x
A2ALV3	A2ALV3	SH3G2	Sh3gl2	x							x								x						x
D3YZU1	SHAN1	SHAN1	Shank1	x							x													x	x
D3Z5K8	D3Z5K8	SHAN2	Shank2	x							x	x		x										x	x
Q4ACU6	SHAN3	SHAN3	Shank3	x						x				x										x	x
A2AWI7	A2AWI7	SHLB2	Sh3glb2	x							x			x			x								x
P97797	SHPS1	SHPS1	Sirpa	x							x														x
Q8C3Q5	SHSA7	SHSA7	Shisa7	x						x							x								x
A0A140LHL5	A0A140LHL5	SIR2	Sirt2	x							x			x		x	x								x
Q9WTX5	SKP1	SKP1	Skp1	x				x			x			x			x								x
D3Z781	D3Z781	SKT	Etl4	x						x															x
Q9DB05	SNAA	SNAA	Napa	x			x	x			x						x								x
P28663	SNAB	SNAB	Napb	x							x						x								x
D3Z4B2	D3Z4B2	SNAG	Napg	x		x	x	x	x		x													x	x
O55100	SNG1	SNG1	Syngr1	x				x	x		x						x								x
Q8R191	SNG3	SNG3	Syngr3	x							x													x	x
P60879	SNP25	SNP25	Snap25	x							x	x												x	x
Q80U23	SNPH	SNPH	Snph	x						x			x						x						x
P08228	SODC	SODC	Sod1	x	IMS	x	x	x	x		x			x			x							x	x
P09671	SODM	SODM	Sod2	x	Matrix						x		x												x
Q91XH5	Q91XH5	SPRE	Spr	x	unknown					x				x			x								x
Q62261	SPTB2	SPTB1	Sptbn1	x				x			x						x								x
Q68FG2	Q68FG2	SPTB2	Sptbn2	x				x		x		x					x							x	x
A3KGU7	A3KGU7	SPTN1	Sptan1	x							x	x							x						x
F6ZKZ3	F6ZKZ3	SQOR	Sqor		MIM								x												x
A0A286YCQ0	A0A286YCQ0	SRBS1	Sorbs1	x						x								x			x			x	x
A0A0R4J1T1	A0A0R4J1T1	SRBS2	Sorbs2	x						x															x
A0A571BDG6	A0A571BDG6	SRCN1	Srcin1	x							x													x	x
E9QN14	E9QN14	SRGP3	Srgap3	x						x							x	x							x
Q8BWF0	SSDH	SSDH	Aldh5a1	x	Matrix					x			x												x
Q60864	STIP1	STIP1	Stip1	x							x			x			x							x	x
Q99JB2	STML2	STML2	Stoml2	x	MIM					x							x							x	x
P54227	STMN1	STMN1	Stmn1	x							x						x								x
Q9ER00	STX12	STX12	Stx12	x			x	x			x	x		x								x			x
O35526	STX1A	STX1A	Stx1a	x							x	x			x										x
P61264	STX1B	STX1B	Stx1b	x							x	x			x										x
O08599	STXB1	STXB1	Stxbp1	x							x			x			x								x
D3Z079	D3Z079	STXB5	Stxbp5	x							x						x								x
Q9WUM5	SUCA	SUCA	Suclg1	x	Matrix						x		x				x							x	x
Q9Z2I9	SUCB1	SUCB1	Sucla2	x	Matrix					x			x												x
Q9Z2I8	SUCB2	SUCB2	Suclg2	x	Matrix					x			x											x	x
Q9JIS5	SV2A	SV2A	Sv2a	x							x						x								x
Q8BG39	SV2B	SV2B	Sv2b	x							x														x
A0A338P799	A0A338P799	SYGP1	Syngap1	x							x			x											x
Q8BIJ6	SYIM	SYIM	Iars2	x	Matrix					x			x												x
O88935	SYN1	SYN1	Syn1	x							x														x
Q64332	SYN2	SYN2	Syn2	x							x			x											x
D3Z656	D3Z656	SYNJ1	Synj1	x							x			x			x	x							x
Q8CC35	SYNPO	SYNPO	Synpo	x							x						x				x			x	x
Q62277	SYPH	SYPH	Syp	x							x														x
Q9JJL8	SYSM	SYSM	Sars2	x	Matrix					x		x	x	x											x
P46096	SYT1	SYT1	Syt1	x			x				x														x
A0A0R4J2C2	A0A0R4J2C2	SYT2	Syt2	x							x														x
O55042	SYUA	SYUA	Snca	x					x		x														x
Q91ZZ3	SYUB	SYUB	Sncb	x							x														x
Q9R1Q8	TAGL3	TAGL3	Tagln3	x				x		x															x
B1AQW2	B1AQW2	TAU	Mapt	x							x			x										x	x
A0A0A0MQA5	A0A0A0MQA5	TBA4A	Tuba4a	x							x								x						x
Q9ERD7	TBB3	TBB3	Tubb3	x				x			x								x						x
Q9D6F9	TBB4A	TBB4A	Tubb4a	x				x			x								x						x
P99024	TBB5	TBB5	Tubb5	x							x														x
P11983	TCPA	TCPA	Tcp1	x				x			x														x
P80314	TCPB	TCPB	Cct2	x				x	x		x						x								x
G5E839	G5E839	TCPD	Cct4	x				x			x			x			x								x
P80316	TCPE	TCPE	Cct5	x				x			x														x
P80318	TCPG	TCPG	Cct3	x				x			x						x							x	x
P80313	TCPH	TCPH	Cct7	x				x			x						x								x
P42932	TCPQ	TCPQ	Cct8	x				x	x		x			x			x			x					x
Q52KG9	Q52KG9	TCPZ	Cct6a	x				x			x						x								x
A0A0G2JFB2	A0A0G2JFB2	TDRKH	Tdrkh	x	Membrane					x							x	x							x
Q8BYI9	TENR	TENR	Tnr	x						x															x
Q01853	TERA	TERA	Vcp	x		x			x		x			x			x								x
Q8QZT1	THIL	THIL	Acat1	x	Matrix					x			x												x
Q8BWT1	THIM	THIM	Acaa2	x	Matrix					x			x												x
P10639	THIO	THIO	Txn	x			x				x			x			x								x
Q8BH55	THNS1	THNS1	Thnsl1	x	Matrix					x			x	x			x								x
Q99J99	THTM	THTM	Mpst	x	MIM					x			x				x								x
P52196	THTR	THTR	Tst	x	Matrix					x			x												x
A0A1L1SUX8	A0A1L1SUX8	THY1	Thy1	x							x			x										x	x
Z4YN86	Z4YN86	TIM22	Timm22	x	MIM					x															x
O35857	TIM44	TIM44	Timm44	x	MIM					x			x												x
Q9D880	TIM50	TIM50	Timm50	x	MIM					x			x	x											x
Q9WV98	TIM9	TIM9	Timm9	x	MIM					x			x												x
P40142	TKT	TKT	Tkt	x				x			x			x											x
Q9CR76	TM186	TM186	Tmem186		MIM					x														x	x
D3YXS8	D3YXS8	TM40L	Tomm40l	x	MOM					x															x
Q8BK08	TMM11	TMM11	Tmem11	x	MIM					x			x												x
Q4VAE3	TMM65	TMM65	Tmem65	x	MIM					x															x
Q9JKK7	TMOD2	TMOD2	Tmod2	x						x				x		x									x
D3Z2J6	D3Z2J6	TMX2	Tmx2	x			x				x			x			x								x
Q9CPQ3	TOM22	TOM22	Tomm22	x	MOM					x			x												x
Q9CZW5	TOM70	TOM70	Tomm70	x							x		x												x
P17751	TPIS	TPIS	Tpi1	x				x			x			x											x
G5E8R0	G5E8R0	TPM1	Tpm1	x				x		x							x				x				x
Q7TQD2	TPPP	TPPP	Tppp	x							x		x				x								x
Q9CRB6	TPPP3	TPPP3	Tppp3	x						x						x									x
Q9CQN1	TRAP1	TRAP1	Trap1	x	Matrix					x			x												x
Q9D3A9	TTYH1	TTYH1	Ttyh1	x							x			x										x	x
Q8JZU2	TXTP	TXTP	Slc25a1	x	MIM		x			x															x
Q02053	UBA1	UBA1	Uba1	x		x		x	x	x				x			x								x
P61089	UBE2N	UBE2N	Ube2n	x				x		x				x		x									x
Q3U4W8	Q3U4W8	UBP5	Usp5	x					x	x				x			x								x
Q9R0P9	UCHL1	UCHL1	Uchl1	x					x		x			x			x								x
Q9CR68	UCRI	UCRI	Uqcrfs1	x	MIM					x			x												x
P51863	VA0D1	VA0D1	Atp6v0d1	x		x	x	x	x		x														x
D3YTU0	D3YTU0	VAMP1	Vamp1	x			x				x														x
B0QZN5	B0QZN5	VAMP2	Vamp2	x			x	x			x														x
Q9WV55	VAPA	VAPA	Vapa	x			x		x		x												x		x
Q8BH80	Q8BH80	VAPB	Vapb	x			x				x												x		x
Q62465	VAT1	VAT1	Vat1	x				x	x		x														x
P50516	VATA	VATA	Atp6v1a	x		x	x	x	x		x	x		x			x								x
P62814	VATB2	VATB2	Atp6v1b2	x		x	x	x	x		x	x													x
Q9Z1G3	VATC1	VATC1	Atp6v1c1	x		x	x	x	x		x			x			x								x
P57746	VATD	VATD	Atp6v1d	x		x	x	x	x		x			x										x	x
P50518	VATE1	VATE1	Atp6v1e1	x		x	x	x	x		x														x
Q9WTT4	VATG2	VATG2	Atp6v1g2	x							x														x
A0A0A6YX18	A0A0A6YX18	VATH	Atp6v1h	x		x	x	x	x		x						x				x			x	x
Q60932	VDAC1	VDAC1	Vdac1	x	MOM		x				x														x
G3UX26	G3UX26	VDAC2	Vdac2	x	MOM		x				x		x												x
J3QMG3	J3QMG3	VDAC3	Vdac3	x	MOM		x				x		x												x
A0A1B0GRU0	A0A1B0GRU0	VGLU1	Slc17a7	x							x														x
O35633	VIAAT	VIAAT	Slc32a1	x							x						x								x
P20152	VIME	VIME	Vim	x						x										x					x
P62761	VISL1	VISL1	Vsnl1	x							x						x								x
K3W4T3	K3W4T3	VPP1	Atp6v0a1	x			x	x	x		x	x		x			x					x			x
Q9EQH3	VPS35	VPS35	Vps35	x		x	x	x	x	x		x													x
Q8CC88	VWA8	VWA8	Vwa8	x	Matrix		x			x		x													x
Q8VHI6	WASF3	WASF3	Wasf3	x							x														x
O88342	WDR1	WDR1	Wdr1	x						x														x	x
Q920I9	WDR7	WDR7	Wdr7	x							x			x			x								x
Q9CQW1	YKT6	YKT6	Ykt6	x							x		x				x								x
A0A0A6YW67	A0A0A6YW67	A0A0A6YW67	Gm8797
A0A1Y7VKY1	A0A1Y7VKY1	A0A1Y7VKY1	Rps18-ps5
A0A0R4J083	A0A0R4J083	ACADL	Acadl	x	MIM					x
P63260	ACTG	ACTG	Actg1	x							x
Q925I1	ATAD3	ATAD3	Atad3	x						x
B2RXT3	B2RXT3	B2RXT3	Ogdhl		Matrix					x						x
Q9DB72	BTBDH	BTBDH	Btbd17	x							x
Q99L04	DHRS1	DHRS1	Dhrs1	x	MIM					x				x			x	x
E9PX29	E9PX29	E9PX29	Sptbn4							x				x		x
A0A0R4J094	A0A0R4J094	FAHD2	Fahd2a	x	Matrix
P63094	GNAS2	GNAS2	Gnas					x			x			x			x							x
Q8C419	GP158	GP158	Gpr158	x							x
Q61625	GRID2	GRID2	Grid2	x						x
P38647	GRP75	GRP75	Hspa9	x	Matrix					x			x
P43274	H14	H14	H1-4											x			x
A0A0N4SV66	A0A0N4SV66	H2AJ	H2aj											x
Q6ZWY9	H2B1C	H2B1C	H2bc8											x			x
Q99JP6	HOME3	HOME3	Homer3							x							x							x
I3ITR1	I3ITR1	I3ITR1	AK157302
P70404	IDHG1	IDHG1	Idh3g	x	Matrix						x		x			x
P85094	ISC2A	ISC2A	Isoc2a	x	Matrix		x
Q8BI08	MAL2	MAL2	Mal2	x			x
Q922Q1	MARC2	MARC2	Mtarc2	x	MOM
Q7TNS2	MIC10	MIC10	Micos10		MIM								x
Q8C5H8	NAKD2	NAKD2	Nadk2	x	Matrix					x			x
P60761	NEUG	NEUG	Nrgn								x
Q922Q4	P5CR2	P5CR2	Pycr2	x	Matrix					x			x
Q8BR92	PALM2	PALM2	Palm2	x							x
A0A384DV92	A0A384DV92	PDE10	Pde10a	x							x
A0A0G2JGY9	A0A0G2JGY9	PLPR4	Plppr4	x							x
Q0VF55	Q0VF55	Q0VF55	Atp2b3								x
Q9CPX8	QCR10	QCR10	Uqcr11		MIM
P47955	RLA1	RLA1	Rplp1	x													x						x
Q9DB15	RM12	RM12	Mrpl12	x	Matrix					x			x
A2AKW0	A2AKW0	S2551	Slc25a51	x	MIM					x			x
E9Q3V0	E9Q3V0	SC6A9	Slc6a9	x							x			x								x
A0A0J9YTY0	A0A0J9YTY0	SEPT11	Septin11	x													x
D3YYB1	D3YYB1	SEPT2	Septin2	x										x					x		x			x
Q9Z1S5	SEPT3	SEPT3	Septin3	x										x							x			x
A0A5F8MP96	A0A5F8MP96	SEPT4	Septin4	x	MOM									x
Q9R1T4	SEPT6	SEPT6	Septin6	x													x
E9Q1G8	E9Q1G8	SEPT7	Septin7	x													x		x		x			x
B7ZC46	B7ZC46	SEPT8	Septin8	x													x				x
A2A6U3	A2A6U3	SEPT9	Septin9	x																	x
Q6NZL0	SOGA3	SOGA3	Soga3	x							x			x			x
P68369	TBA1A	TBA1A	Tuba1a								x								x
Q3UUI3	THEM4	THEM4	Them4	x	MIM					x
Q921H8	THIKA	THIKA	Acaa1a	x	Matrix		x			x

[truncated: 1 more sheets: Human Lipofuscin & Whole Brai ]
