# Supplementary material for: Deficient de-S-acylation in aging and CLN1 contributes to lyso-mitochondrial dysfunction, lipid dyshomeostasis, and resultant lipofuscin biogenesis
Source: Research Square preprint supplement (doi:10.21203/rs.3.rs-8770768/v1), 2026-02-09
Supplement: Supplementary file 3 [file bd93a0660c547741faadb5c5.xlsx]

## Sheet: Data Description
Title: Deficient de-S-acylation in aging and CLN1 contributes to lyso-mitochondrial dysfunction, lipid dyshomeostasis, and resultant lipofuscin biogenesis
Authors: Sofia Massaro Tieze, Alexander Esqueda, Rachel McAllister, Matija Lagator, Betül Yücel, Eric Sun, TuKiet T. Lam, Nicholas Lockyer, Kallol Gupta, Sreeganga S. Chandra
Data Description: This file contains the underlying numerical data and UniProt IDs for molecules constituting canonical pathways identified by Ingenuity Pathway Analysis (IPA). These data include the top 10 canonical pathways for (Fig. 3E) consensus lipofuscin proteome hits (n = 688), (Fig. S6A) consensus Ppt1 KO lipofuscin proteins across timepoints (n = 745), (Fig. S6B) consensus WT lipofuscin …

## Sheet: Fig. 3E
	Fig. 3E - Consensus Lipofuscin Proteome Top 10 Canonical Pathways
	Ingenuity Canonical Pathways	-log(p-value)	Ratio	Molecules
	Mitochondrial Dysfunction	71	0.285	ACADL,ACO2,AIFM1,ATP1A1,ATP1A2,ATP1A3,ATP1B1,ATP1B2,Atp5e,ATP5F1A,ATP5F1B,ATP5F1C,ATP5F1D,ATP5MF,ATP5PB,ATP5PD,ATP5PF,ATP5PO,CACNA2D1,CACNG8,Calm1 (includes others),CAMK2A,CAMK2B,CAMK2G,CAPN2,COX4I1,COX5A,COX6B1,Cox6c,Cox7a2/Cox7a2l2,CYC1,CYCS,DLAT,DLD,DNM1L,FIS1,GPD2,GSTP1,HSD17B10,IDH2,ITPR1,MAOA,MAOB,MAPT,MCU,MFN2,MT-CO2,MT-CO3,NDUFA10,NDUFA11,NDUFA12,NDUFA13,NDUFA2,NDUFA4,NDUFA5,NDUFA6,NDUFA7…
	Electron transport, ATP synthesis, and heat production by uncoupling proteins	49	0.422	ACAD9,ATP5F1A,ATP5F1B,ATP5F1C,ATP5F1D,ATP5MF,ATP5PB,ATP5PD,ATP5PF,ATP5PO,COX4I1,COX5A,COX6B1,CYC1,CYCS,ETFA,ETFB,ETFDH,LRPPRC,MT-CO2,MT-CO3,NDUFA10,NDUFA11,NDUFA12,NDUFA13,NDUFA2,NDUFA4,NDUFA5,NDUFA6,NDUFA7,NDUFA8,NDUFA9,NDUFAB1,NDUFB10,NDUFB4,NDUFB5,NDUFB7,NDUFB8,NDUFB9,NDUFC2,NDUFS1,NDUFS2,NDUFS3,NDUFS4,NDUFS7,NDUFV1,NDUFV2,SDHA,SDHB,TRAP1,UQCRC1,UQCRC2,UQCRFS1,UQCRQ
	Oxidative Phosphorylation	46.9	0.446	Atp5e,ATP5F1A,ATP5F1B,ATP5F1C,ATP5F1D,ATP5MF,ATP5PB,ATP5PD,ATP5PF,ATP5PO,COX4I1,COX5A,COX6B1,Cox6c,Cox7a2/Cox7a2l2,CYC1,CYCS,MT-CO2,MT-CO3,NDUFA10,NDUFA11,NDUFA12,NDUFA13,NDUFA2,NDUFA4,NDUFA5,NDUFA6,NDUFA7,NDUFA8,NDUFA9,NDUFAB1,NDUFB10,NDUFB4,NDUFB5,NDUFB7,NDUFB8,NDUFB9,NDUFS1,NDUFS2,NDUFS3,NDUFS4,NDUFS7,NDUFV1,NDUFV2,SDHA,SDHB,UQCRC1,UQCRC2,UQCRFS1,UQCRQ
	Sirtuin Signaling Pathway	36.9	0.216	ACADL,ACLY,ATP5F1A,ATP5F1B,ATP5F1C,ATP5F1D,ATP5PB,ATP5PF,CYC1,GLS,GLUD1,GOT2,IDH2,LDHB,NDUFA10,NDUFA11,NDUFA12,NDUFA13,NDUFA2,NDUFA4,NDUFA5,NDUFA6,NDUFA7,NDUFA8,NDUFA9,NDUFAB1,NDUFB10,NDUFB4,NDUFB5,NDUFB7,NDUFB8,NDUFB9,NDUFS1,NDUFS2,NDUFS3,NDUFS4,Ndufs6,NDUFS7,NDUFV1,NDUFV2,PDHA1,PDK1,PFKM,PGAM1,PGK1,SDHA,SDHB,SIRT2,SLC25A4,SLC25A5,SOD1,SOD2,TIMM44,TIMM50,TIMM9,TOMM22,TOMM70,TUBA4A,UQCRC2,UQCRFS1…
	Estrogen Receptor Signaling	30.5	0.161	ATP5F1A,ATP5F1B,ATP5F1C,ATP5F1D,ATP5PB,CACNA2D1,CACNG8,CFL1,CTBP1,CYC1,DLG4,GNAI1,GNAI2,GNAO1,GNAQ,GNAS,GNAZ,GNB1,GNB2,GNB4,GNB5,GNG12,GNG2,HSP90AA1,HSP90AB1,HSP90B1,MAP2K1,MCU,MYL6,NDUFA10,NDUFA11,NDUFA12,NDUFA13,NDUFA2,NDUFA4,NDUFA5,NDUFA6,NDUFA7,NDUFA8,NDUFA9,NDUFAB1,NDUFB10,NDUFB4,NDUFB5,NDUFB7,NDUFB8,NDUFB9,NDUFS1,NDUFS2,NDUFS3,NDUFS4,NDUFS7,NDUFV1,NDUFV2,PDIA3,PLCB1,PRKAR2A,PRKAR2B,PRKCG,RA…
	Synaptogenesis Signaling Pathway	28	0.177	ACTR2,ACTR3,AP2A1,AP2A2,AP2B1,AP2M1,ARPC1A,ARPC2,ARPC3,ARPC4,ARPC5,ARPC5L,CACNA2D1,CADM1,Calm1 (includes others),CAMK2A,CAMK2B,CAMK2G,CDH13,CDH2,CFL1,CNTNAP1,CNTNAP2,CPLX2,CTNNB1,DLG4,DNAJC5,FARP1,GRIN1,HSPA8,ITPR1,LRP1,MAP1B,MAPT,NAPA,NAPB,NRXN1,NSF,PRKAR2A,PRKAR2B,RAB3A,RAB5C,RALA,RHOA,SNAP25,SNCA,SNCB,STX1A,STX1B,STXBP1,SYN1,SYN2,SYNGAP1,SYT1,SYT2,VAMP2
	The citric acid (TCA) cycle and respiratory electron transport	23.9	0.455	ACO2,BSG,CS,DLAT,DLD,DLST,FH,IDH2,IDH3A,IDH3G,LDHB,MDH2,ME2,ME3,MPC1,OGDH,PDHA1,PDHB,PDK1,SDHA,SDHB,SUCLA2,SUCLG1,SUCLG2,VDAC1
	GABAergic Receptor Signaling Pathway (Enhanced)	23	0.252	ABAT,ALDH5A1,CACNA2D1,CACNG8,CNTNAP1,CNTNAP2,GABBR1,GABBR2,GABRA1,GAD1,GLS,GLUD1,GLUL,GNAI1,GNAI2,GNAO1,GNB1,GNB2,GNB4,GNB5,GNG12,GNG2,GOT1,GOT2,GPHN,GRIN1,ITPR1,NRXN1,PRKAR2A,PRKAR2B,SLC12A5,SLC32A1,SLC38A3,SLC6A1,SLC6A11
	Granzyme A Signaling	22.5	0.36	NDUFA10,NDUFA11,NDUFA12,NDUFA13,NDUFA2,NDUFA4,NDUFA5,NDUFA6,NDUFA7,NDUFA8,NDUFA9,NDUFAB1,NDUFB10,NDUFB4,NDUFB5,NDUFB7,NDUFB8,NDUFB9,NDUFS1,NDUFS2,NDUFS3,NDUFS4,Ndufs6,NDUFS7,NDUFV1,NDUFV2,NME1

## Sheet: Fig. S6A
	Fig. S6A - PPT1 KO-2-4-7 Consensus Proteome Top 10 Upregulated Canonical Pathways
	Ingenuity Canonical Pathways	-log(p-value)	Ratio	Molecules
	Mitochondrial Dysfunction	82.5	0.313	ACADL,ACO2,AIFM1,ATP1A1,Atp1a2,ATP1A3,ATP1B1,ATP1B2,ATP5F1A,ATP5F1B,ATP5F1C,ATP5F1D,ATP5F1E,ATP5ME,ATP5MF,ATP5PB,ATP5PD,ATP5PF,ATP5PO,CACNA2D1,CACNG8,CALM1,CAMK2A,CAMK2B,CAMK2D,CAMK2G,CAPN2,COX4I1,COX5A,COX5B,COX6B1,COX6C,COX7A2,CYB5R3,CYC1,CYCS,DLAT,DLD,DNM1L,FIS1,GPD2,Gstp1 (includes others),HSD17B10,HTRA2,IDH2,ITPR1,MAOA,MAOB,MAPT,MCU,MFN2,MT-CO2,MT-CO3,MT-ND5,NDUFA10,NDUFA11,NDUFA12,NDUFA13,N…
	Mitochondrial protein degradation	64.1	0.592	ACAD8,ACADSB,ACAT1,ACO2,AFG3L2,ALDH18A1,ALDH1B1,ALDH2,ATP5F1A,ATP5F1B,ATP5F1C,ATP5PD,ATP5PF,ATP5PO,BDH1,COX4I1,COX5A,COX5B,CS,DBT,DLD,ECI1,FECH,FH,GLUD1,HADH,HSD17B10,HSPA9,HSPD1,HTRA2,IARS2,IDH2,IDH3A,LONP1,MDH2,ME2,MRPL12,MT-CO2,MT-ND5,NADK2,NDUFA13,NDUFA2,NDUFS1,NDUFS3,NDUFV1,OGDH,OPA1,OXCT1,PCCB,PDHA1,PDHB,PDK1,SLC25A5,SUCLG2,TIMM10,TIMM9,UQCRC2,UQCRQ
	Oxidative Phosphorylation	57.1	0.514	ATP5F1A,ATP5F1B,ATP5F1C,ATP5F1D,ATP5F1E,ATP5ME,ATP5MF,ATP5PB,ATP5PD,ATP5PF,ATP5PO,COX4I1,COX5A,COX5B,COX6B1,COX6C,COX7A2,CYC1,CYCS,MT-CO2,MT-CO3,MT-ND5,NDUFA10,NDUFA11,NDUFA12,NDUFA13,NDUFA2,NDUFA4,NDUFA5,NDUFA6,NDUFA7,NDUFA8,NDUFA9,NDUFAB1,NDUFB10,NDUFB4,NDUFB5,NDUFB7,NDUFB8,NDUFB9,NDUFS1,NDUFS2,NDUFS3,NDUFS4,NDUFS5,NDUFS6,NDUFS7,NDUFV1,NDUFV2,SDHA,SDHB,UQCRB,UQCRC1,UQCRC2,UQCRFS1,UQCRQ
	Respiratory electron transport	54	0.568	COX4I1,COX5A,COX5B,COX6B1,COX6C,COX7A2,CYC1,CYCS,ETFA,ETFB,ETFDH,MT-CO2,MT-CO3,MT-ND5,NDUFA10,NDUFA11,NDUFA12,NDUFA13,NDUFA2,NDUFA4,NDUFA5,NDUFA6,NDUFA7,NDUFA8,NDUFA9,NDUFAB1,NDUFB10,NDUFB4,NDUFB5,NDUFB7,NDUFB8,NDUFB9,NDUFC2,NDUFS1,NDUFS2,NDUFS3,NDUFS4,NDUFS5,NDUFS6,NDUFS7,NDUFV1,NDUFV2,SDHA,SDHB,TRAP1,UQCRB,UQCRC1,UQCRC2,UQCRFS1,UQCRQ
	Sirtuin Signaling Pathway	44.8	0.238	ACADL,ACLY,ATP5F1A,ATP5F1B,ATP5F1C,ATP5F1D,ATP5F1E,ATP5PB,ATP5PF,CYC1,GLS,GLUD1,GOT2,IDH2,LDHA,LDHB,MT-ND5,NDUFA10,NDUFA11,NDUFA12,NDUFA13,NDUFA2,NDUFA4,NDUFA5,NDUFA6,NDUFA7,NDUFA8,NDUFA9,NDUFAB1,NDUFB10,NDUFB4,NDUFB5,NDUFB7,NDUFB8,NDUFB9,NDUFS1,NDUFS2,NDUFS3,NDUFS4,NDUFS5,NDUFS6,NDUFS7,NDUFV1,NDUFV2,PCK2,PDHA1,PDK1,PFKM,PGAM1,PGK1,PPID,SDHA,SDHB,SIRT2,SLC25A4,SLC25A5,SOD1,SOD2,TIMM10,TIMM13,TIMM…
	Parkinson's Signaling Pathway	39.8	0.215	ACTG1,ALDH18A1,ALDH1B1,ALDH1L1,ALDH2,Aldh3a2,ALDH4A1,ALDH5A1,ALDH6A1,ALDH7A1,ALDH9A1,ATP6V0A1,ATP6V0D1,ATP6V1A,ATP6V1B2,ATP6V1C1,ATP6V1D,ATP6V1E1,ATP6V1G2,ATP6V1H,CACNA2D1,CACNG8,CALM1,CAMK2A,CAMK2B,CAMK2D,CAMK2G,GRIA1,GRIA2,GRIN1,HSPA5,ITPR1,MAOA,MAOB,MT-ND5,NDUFA10,NDUFA11,NDUFA12,NDUFA13,NDUFA2,NDUFA4,NDUFA5,NDUFA6,NDUFA7,NDUFA8,NDUFA9,NDUFAB1,NDUFB10,NDUFB4,NDUFB5,NDUFB7,NDUFB8,NDUFB9,NDUFS1,…
	Estrogen Receptor Signaling	36.7	0.177	ATP5F1A,ATP5F1B,ATP5F1C,ATP5F1D,ATP5F1E,ATP5PB,ATP5PF,CACNA2D1,CACNG8,CFL1,CFL2,CTBP1,CYC1,DLG4,GNAI1,GNAI2,GNAO1,GNAQ,GNAS,GNAZ,GNB1,GNB2,GNB4,GNB5,GNG12,GNG2,HSP90AA1,HSP90AB1,HSP90B1,MAP2K1,MCU,MT-ND5,MYL6,NDUFA10,NDUFA11,NDUFA12,NDUFA13,NDUFA2,NDUFA4,NDUFA5,NDUFA6,NDUFA7,NDUFA8,NDUFA9,NDUFAB1,NDUFB10,NDUFB4,NDUFB5,NDUFB7,NDUFB8,NDUFB9,NDUFS1,NDUFS2,NDUFS3,NDUFS4,NDUFS5,NDUFS6,NDUFS7,NDUFV1,ND…
	Synaptogenesis Signaling Pathway	33.8	0.196	ACTR2,ACTR3,AP2A1,AP2A2,AP2B1,AP2M1,ARPC1A,ARPC2,ARPC3,ARPC4,ARPC5,ARPC5L,CACNA2D1,CADM1,CALM1,CAMK2A,CAMK2B,CAMK2D,CAMK2G,CDH13,CDH2,CFL1,CNTNAP1,CNTNAP2,CPLX2,CTNNB1,DLG4,DNAJC5,FARP1,GRIA1,GRIA2,GRIN1,HSPA8,ITPR1,LRP1,MAP1B,MAPT,MARCKS,NAPA,NAPB,NAPG,NRXN1,NSF,PRKAR2A,PRKAR2B,RAB3A,RAB5C,RALA,RAP1A,RHOA,SNAP25,SNCA,SNCB,STX1A,STX1B,STXBP1,SYN1,SYN2,SYNGAP1,SYT1,SYT2,VAMP2
	Complex I biogenesis	28.2	0.441	ACAD9,HSPA9,MT-ND5,NDUFA10,NDUFA11,NDUFA12,NDUFA13,NDUFA2,NDUFA5,NDUFA6,NDUFA7,NDUFA8,NDUFA9,NDUFAB1,NDUFB10,NDUFB4,NDUFB5,NDUFB7,NDUFB8,NDUFB9,NDUFC2,NDUFS1,NDUFS2,NDUFS3,NDUFS4,NDUFS5,NDUFS6,NDUFS7,NDUFV1,NDUFV2
	Neutrophil Extracellular Trap Signaling Pathway	27	0.15	ATP5F1A,ATP5F1B,ATP5F1C,ATP5F1D,ATP5F1E,ATP5PB,ATP5PF,C1QB,CYC1,ITPR1,MAP2K1,MT-ND5,NDUFA10,NDUFA11,NDUFA12,NDUFA13,NDUFA2,NDUFA4,NDUFA5,NDUFA6,NDUFA7,NDUFA8,NDUFA9,NDUFAB1,NDUFB10,NDUFB4,NDUFB5,NDUFB7,NDUFB8,NDUFB9,NDUFS1,NDUFS2,NDUFS3,NDUFS4,NDUFS5,NDUFS6,NDUFS7,NDUFV1,NDUFV2,PDIA3,PLCB1,PPID,PPP3CA,PPP3R1,PRDX6,PRKCG,SDHA,SDHB,SLC25A4,SLC25A5,TIMM10,TIMM13,TIMM44,TIMM50,TIMM9,TOMM22,TOMM70,UQC…

## Sheet: Fig. S6B
	Fig. S6B - WT-12-18-24 Consensus Proteome Top 10 Upregulated Canonical Pathways
	Ingenuity Canonical Pathways	-log(p-value)	Ratio	Molecules
	Mitochondrial Dysfunction	89.7	0.359	ACADL,ACO2,AIFM1,ATP1A1,Atp1a2,ATP1A3,ATP1B1,ATP1B2,ATP1B3,ATP5F1A,ATP5F1B,ATP5F1C,ATP5F1D,ATP5F1E,ATP5ME,ATP5MF,ATP5MG,ATP5PB,ATP5PD,ATP5PF,ATP5PO,CACNA1E,CACNA2D1,CACNA2D2,CACNA2D3,CACNG8,CALM1,CAMK2A,CAMK2B,CAMK2G,CAPN2,COX4I1,COX5A,COX6B1,COX6C,COX7A2,CYB5R3,CYC1,CYCS,DLAT,DLD,DNM1L,FIS1,GPD2,GPX4,Gstp1 (includes others),GSTZ1,HSD17B10,IDH2,ITPR1,MAOA,MAOB,MAPT,MCU,MFN2,MGST3,MT-CO2,MT-CO3,MT…
	Oxidative Phosphorylation	66.6	0.606	ATP5F1A,ATP5F1B,ATP5F1C,ATP5F1D,ATP5F1E,ATP5ME,ATP5MF,ATP5MG,ATP5PB,ATP5PD,ATP5PF,ATP5PO,COX4I1,COX5A,COX6B1,COX6C,COX7A2,CYC1,CYCS,MT-CO2,MT-CO3,MT-ND1,MT-ND5,NDUFA10,NDUFA11,NDUFA12,NDUFA13,NDUFA2,NDUFA3,NDUFA4,NDUFA5,NDUFA6,NDUFA7,NDUFA8,NDUFA9,NDUFAB1,NDUFB10,NDUFB11,NDUFB4,NDUFB5,NDUFB6,NDUFB7,NDUFB8,NDUFB9,NDUFS1,NDUFS2,NDUFS3,NDUFS4,NDUFS5,NDUFS6,NDUFS7,NDUFS8,NDUFV1,NDUFV2,NDUFV3,SDHA,SDH…
	Respiratory electron transport	65.3	0.682	COX4I1,COX5A,COX6B1,COX6C,COX7A2,CYC1,CYCS,ETFA,ETFB,ETFDH,MT-CO2,MT-CO3,MT-ND1,MT-ND5,NDUFA10,NDUFA11,NDUFA12,NDUFA13,NDUFA2,NDUFA3,NDUFA4,NDUFA5,NDUFA6,NDUFA7,NDUFA8,NDUFA9,NDUFAB1,NDUFB10,NDUFB11,NDUFB4,NDUFB5,NDUFB6,NDUFB7,NDUFB8,NDUFB9,NDUFC2,NDUFS1,NDUFS2,NDUFS3,NDUFS4,NDUFS5,NDUFS6,NDUFS7,NDUFS8,NDUFV1,NDUFV2,NDUFV3,SDHA,SDHB,SDHC,TMEM186,TRAP1,UQCR10,UQCR11,UQCRB,UQCRC1,UQCRC2,UQCRFS1,UQC…
	Mitochondrial protein degradation	62.6	0.622	ACAD8,ACADSB,ACAT1,ACO2,AFG3L2,ALDH18A1,ALDH1B1,ALDH2,ATP5F1A,ATP5F1B,ATP5F1C,ATP5MG,ATP5PD,ATP5PF,ATP5PO,BDH1,COX4I1,COX5A,CS,DBT,DLD,ECI1,FECH,FH,GLUD1,HADH,HSD17B10,HSPA9,HSPD1,IARS2,IDH2,IDH3A,LONP1,MDH2,ME2,MRPL12,MT-CO2,MT-ND1,MT-ND5,NADK2,NDUFA13,NDUFA2,NDUFB6,NDUFS1,NDUFS3,NDUFV1,NDUFV3,OGDH,OPA1,OXCT1,PCCB,PDHA1,PDHB,PDK1,SHMT2,SLC25A5,SUCLG2,TIMM22,TIMM9,UQCRC2,UQCRQ
	Sirtuin Signaling Pathway	47.5	0.272	ACADL,ACLY,ATP5F1A,ATP5F1B,ATP5F1C,ATP5F1D,ATP5F1E,ATP5PB,ATP5PF,CYC1,GLS,GLUD1,GOT2,H1-4,IDH2,LDHA,LDHB,MAPK1,MT-ND1,MT-ND5,NDRG1,NDUFA10,NDUFA11,NDUFA12,NDUFA13,NDUFA2,NDUFA3,NDUFA4,NDUFA5,NDUFA6,NDUFA7,NDUFA8,NDUFA9,NDUFAB1,NDUFB10,NDUFB11,NDUFB4,NDUFB5,NDUFB6,NDUFB7,NDUFB8,NDUFB9,NDUFS1,NDUFS2,NDUFS3,NDUFS4,NDUFS5,NDUFS6,NDUFS7,NDUFS8,NDUFV1,NDUFV2,NDUFV3,PDHA1,PDK1,PFKM,PGAM1,PGK1,SDHA,SDHB,…
	Estrogen Receptor Signaling	45.1	0.221	ATP5F1A,ATP5F1B,ATP5F1C,ATP5F1D,ATP5F1E,ATP5PB,ATP5PF,CACNA1E,CACNA2D1,CACNA2D2,CACNA2D3,CACNG8,CFL1,CTBP1,CYC1,DLG4,GNA11,GNA13,GNAI1,GNAI2,GNAL,GNAO1,GNAQ,GNAS,GNAZ,GNB1,GNB2,GNB4,GNB5,GNG12,GNG2,HRAS,HSP90AA1,HSP90AB1,HSP90B1,MAP2K1,MAPK1,MCU,MT-ND1,MT-ND5,MYL12B,MYL6,NDUFA10,NDUFA11,NDUFA12,NDUFA13,NDUFA2,NDUFA3,NDUFA4,NDUFA5,NDUFA6,NDUFA7,NDUFA8,NDUFA9,NDUFAB1,NDUFB10,NDUFB11,NDUFB4,NDUFB5,N…
	Parkinson's Signaling Pathway	43.4	0.25	ACTG1,ALDH18A1,Aldh1a1,ALDH1B1,ALDH1L1,ALDH2,Aldh3a2,ALDH4A1,ALDH5A1,ALDH6A1,ALDH7A1,ALDH9A1,ATP6V0A1,ATP6V0D1,ATP6V1A,ATP6V1B2,ATP6V1C1,ATP6V1D,ATP6V1E1,ATP6V1G2,ATP6V1H,CACNA1E,CACNA2D1,CACNA2D2,CACNA2D3,CACNG8,CALM1,CAMK2A,CAMK2B,CAMK2G,GRIN1,GRIN2B,HSPA5,ITPR1,MAOA,MAOB,MAPK1,MT-ND1,MT-ND5,NDUFA10,NDUFA11,NDUFA12,NDUFA13,NDUFA2,NDUFA3,NDUFA4,NDUFA5,NDUFA6,NDUFA7,NDUFA8,NDUFA9,NDUFAB1,NDUFB10,…
	Synaptogenesis Signaling Pathway	41.3	0.243	ACTR2,ACTR3,AP2A1,AP2A2,AP2B1,AP2M1,ARPC1A,ARPC2,ARPC3,ARPC4,ARPC5,ARPC5L,CACNA2D1,CACNA2D2,CADM1,CALM1,CAMK2A,CAMK2B,CAMK2G,CDC42,CDH13,CDH2,CFL1,CLASP2,CNTNAP1,CNTNAP2,CPLX2,CTNNB1,DLG4,DNAJC5,FARP1,GRIN1,GRIN2B,GRM1,GRM2,GRM3,GRM5,HRAS,HSPA8,ITPR1,LRP1,MAP1B,MAPK1,MAPT,MARCKS,NAPA,NAPB,NAPG,NLGN2,NLGN3,NRXN1,NSF,PAFAH1B1,PAK1,PRKAR2A,PRKAR2B,RAB3A,RAB5B,RAB5C,RAC1,RALA,RAP2B,RHOA,SNAP25,SNCA,S…
	Complex I biogenesis	35	0.544	ACAD9,HSPA9,MT-ND1,MT-ND5,NDUFA10,NDUFA11,NDUFA12,NDUFA13,NDUFA2,NDUFA3,NDUFA5,NDUFA6,NDUFA7,NDUFA8,NDUFA9,NDUFAB1,NDUFB10,NDUFB11,NDUFB4,NDUFB5,NDUFB6,NDUFB7,NDUFB8,NDUFB9,NDUFC2,NDUFS1,NDUFS2,NDUFS3,NDUFS4,NDUFS5,NDUFS6,NDUFS7,NDUFS8,NDUFV1,NDUFV2,NDUFV3,TMEM186
	Granzyme A Signaling	32.9	0.493	H1-4,MBP,MT-ND1,MT-ND5,NDUFA10,NDUFA11,NDUFA12,NDUFA13,NDUFA2,NDUFA3,NDUFA4,NDUFA5,NDUFA6,NDUFA7,NDUFA8,NDUFA9,NDUFAB1,NDUFB10,NDUFB11,NDUFB4,NDUFB5,NDUFB6,NDUFB7,NDUFB8,NDUFB9,NDUFS1,NDUFS2,NDUFS3,NDUFS4,NDUFS5,NDUFS6,NDUFS7,NDUFS8,NDUFV1,NDUFV2,NDUFV3,Nme1

## Sheet: Fig. S6C
	Fig. S6C - PPT1-7 vs WT-24 DEGs Top 10 Upregulated Canonical Pathways
	Ingenuity Canonical Pathways	-log(p-value)	Ratio	Molecules
	Electron transport, ATP synthesis, and heat production by uncoupling proteins	7.95	0.0625	ATP5F1D,ATP5MF,ATP5PO,NDUFA2,NDUFA5,NDUFA6,NDUFB7,TMEM186
	Oxidative Phosphorylation	7.01	0.0625	ATP5F1D,ATP5MF,ATP5PO,NDUFA2,NDUFA5,NDUFA6,NDUFB7
	Signaling by Rho Family GTPases	6.57	0.0337	ARPC3,GFAP,GNG12,GNG2,MSN,RHOB,SEPTIN11,SEPTIN2,VIM
	Sirtuin Signaling Pathway	6.26	0.0309	ATP5F1D,NDUFA2,NDUFA5,NDUFA6,NDUFB7,SLC25A4,TIMM10,TIMM22,TOMM22
	Mitochondrial Dysfunction	5.66	0.0262	ATP5F1D,ATP5MF,ATP5PO,HTRA2,NDUFA2,NDUFA5,NDUFA6,NDUFB7,TOMM22
	Neutrophil Extracellular Trap Signaling Pathway	5.12	0.0225	ATP5F1D,NDUFA2,NDUFA5,NDUFA6,NDUFB7,SLC25A4,TIMM10,TIMM22,TOMM22
	Neutrophil degranulation	4.53	0.0189	ASAH1,CTSD,DYNLL1,LAMP1,PSAP,PSMA5,SCAMP1,SYNGR1,VAT1
	Huntington's Disease Signaling	4.33	0.0246	ATP5F1D,CTSD,GNG12,GNG2,GRIN2B,HRAS,PSMA5
	Mitochondrial protein import	4.2	0.0625	SLC25A4,TIMM10,TIMM22,TOMM22
	Estrogen Receptor Signaling	4.18	0.0196	ATP5F1D,GNG12,GNG2,HRAS,NDUFA2,NDUFA5,NDUFA6,NDUFB7

## Sheet: Fig. S6D
	Fig. S6D - WT-24 vs. PPT1-7 DEGs Top 10 Upregulated Canonical Pathways
	Ingenuity Canonical Pathways	-log(p-value)	Ratio	Molecules
	Mitochondrial Dysfunction	17.3	0.0959	ACADL,ATP5F1E,CACNG8,CAMK2B,CAMK2G,CAPN2,COX7A2,CYCS,DLD,DNM1L,FIS1,GPX4,GSTZ1,HSD17B10,IDH2,ITPR1,MCU,MFN2,MT-CO3,NDUFA8,NDUFA9,NDUFAB1,NDUFB5,NDUFB6,NDUFB8,NDUFS2,NDUFS7,PPP3CA,PRKAR2B,SOD1,SOD2,UQCRB,UQCRQ
	Clathrin-mediated endocytosis	14.6	0.154	AAK1,ACTG1,AMPH,AP2A1,AP2B1,AP2M1,ARFGAP1,ARPC1A,ARPC2,BIN1,CTTN,DNAJC6,DNM1,DNM3,EPS15L1,NECAP1,PACSIN1,SNAP91,SYNJ1,SYT2
	Neurexins and neuroligins	12	0.228	CASK,DLG2,DLG4,DLGAP1,DLGAP4,EPB41L1,EPB41L2,GRIN1,NRXN1,SHANK1,SHANK2,SHANK3,SYT2
	Parkinson's Signaling Pathway	11.6	0.0814	ACTG1,ALDH1A1,ALDH1L1,ALDH4A1,ALDH6A1,ALDH7A1,ALDH9A1,ATP6V0D1,ATP6V1D,ATP6V1G2,CACNG8,CAMK2B,CAMK2G,GRIN1,ITPR1,NDUFA8,NDUFA9,NDUFAB1,NDUFB5,NDUFB6,NDUFB8,NDUFS2,NDUFS7,TUBB3,UCHL1
	Opioid Signalling	11.6	0.167	AHCYL1,CAMK2B,CAMK2G,GNA11,GNAI1,GNAI2,GNB2,GNB5,GRK2,ITPR1,PLCB1,PPP2R1A,PPP3CA,PRKAR2B,PRKCG
	Clathrin-mediated Endocytosis Signaling	11.6	0.101	AAK1,ACTG1,AMPH,AP1B1,AP2A1,AP2B1,AP2M1,AP3B2,AP3D1,ARPC1A,ARPC2,ARPC5L,CDC42,CTTN,DNM1,DNM1L,DNM3,PPP3CA,SH3GLB2,SNAP91,SYNJ1
	Electron transport, ATP synthesis, and heat production by uncoupling proteins	11.4	0.133	ACAD9,ATP5F1E,CYCS,ETFA,LRPPRC,MT-CO3,NDUFA8,NDUFA9,NDUFAB1,NDUFB5,NDUFB6,NDUFB8,NDUFS2,NDUFS7,TRAP1,UQCRB,UQCRQ
	Synaptogenesis Signaling Pathway	11.4	0.0794	AP2A1,AP2B1,AP2M1,ARPC1A,ARPC2,ARPC5L,CAMK2B,CAMK2G,CDC42,CNTNAP1,CNTNAP2,DLG4,GRIN1,ITPR1,LRP1,NAPA,NRXN1,PAFAH1B1,PRKAR2B,SNAP25,SNCB,SYN1,SYN2,SYNGAP1,SYT2
	Netrin Signaling	11.2	0.11	ABLIM1,ARPC1A,ARPC2,ARPC5L,CACNG8,CAMK2B,CAMK2G,CDC42,CRMP1,DPYSL2,DPYSL4,DPYSL5,ITPR1,NAPA,PGK1,PPP3CA,PRKAR2B,PRKCG,SNAP25
	Glycolysis I	10.1	0.333	ENO1,ENO2,PFKL,PFKM,PFKP,PGAM1,PGK1,PKM,TPI1

## Sheet: Fig. 6G
	Fig. 6G - Consensus Human dlPFC Lipofuscin Proteome Top 10 Canonical Pathways
	Ingenuity Canonical Pathways	-log(p-value)	Ratio	Molecules
	Mitochondrial Dysfunction	76.7	0.573	ACO2,AIFM1,APP,ATP1A1,ATP1A2,ATP1A3,ATP1B1,ATP1B2,ATP1B3,ATP5F1A,ATP5F1B,ATP5F1C,ATP5F1D,ATP5F1E,ATP5ME,ATP5MF,ATP5MG,ATP5PB,ATP5PD,ATP5PF,ATP5PO,ATPAF1,BAX,BECN1,C9orf72,CACNA1A,CACNA1B,CACNA1E,CACNA2D1,CACNA2D2,CACNA2D3,CACNB1,CACNB3,CACNB4,CACNG2,CACNG3,CACNG8,CALM1,CAMK2A,CAMK2B,CAMK2D,CAMK2G,CAPN1,CAPN2,CAPN5,CAPNS1,CHP1,COX11,COX15,COX4I1,COX5A,COX5B,COX6B1,COX6C,COX7A2,COX7A2L,COX7B,COX7C,…
	Neutrophil degranulation	68.7	0.477	A1BG,ACAA1,ACLY,ACTR10,ACTR1B,ACTR2,ADAM10,AGL,AHSG,ALAD,ALDOA,ALDOC,AMPD3,ANXA2,AP1M1,AP2A2,APEH,APRT,ARL8A,ARMC8,ARPC5,ARSB,ASAH1,ATG7,ATP6AP2,ATP6V0A1,ATP6V1D,ATP8A1,B2M,C3,CAB39,CAND1,CAP1,CAPN1,CAT,CCT2,CCT8,CD44,CD47,CD55,CD59,CD63,CKAP4,COMMD3,COMMD9,COPB1,COTL1,CPNE3,CPPED1,CSNK2B,CST3,CSTB,CTSB,CTSD,CTSG,CTSZ,CYB5R3,CYBB,CYFIP1,DBNL,DDOST,DDX3X,DIAPH1,DNAJC13,DNAJC5,DPP7,DYNC1H1,DYNC1LI1…
	Signaling by ROBO receptors	66.7	0.579	ADRM1,AKAP5,ARHGAP39,CAP1,CAP2,CDC42,CLASP1,CLASP2,CUL2,DAG1,EIF4A3,EIF4G1,ELOB,ELOC,ENAH,ETF1,EVL,GPC1,GSPT1,GSPT2,KGD4,MRPS12,MRPS15,MRPS16,MRPS17,MRPS18A,MRPS18B,MRPS2,MRPS22,MRPS23,MRPS25,MRPS26,MRPS27,MRPS31,MRPS34,MRPS35,MRPS5,MRPS7,NCK2,NELL2,PABPC1,PAK1,PAK2,PAK3,PAK5,PFN1,PFN2,PPP3CB,PRKACA,PRKACB,PRKAR2A,PRKCA,PSMA1,PSMA2,PSMA3,PSMA4,PSMA5,PSMA6,PSMA7,PSMB1,PSMB2,PSMB3,PSMB4,PSMB5,PSMB6…
	Synaptogenesis Signaling Pathway	65	0.552	ACTR2,ACTR3,ADCY1,ADCY2,ADCY5,ADCY9,AFDN,AKT1,AKT3,AP2A1,AP2A2,AP2B1,AP2M1,AP2S1,APOE,ARHGEF7,ARPC1A,ARPC1B,ARPC2,ARPC3,ARPC4,ARPC5,ARPC5L,BRAF,CACNA1B,CACNA2D1,CACNA2D2,CACNB1,CACNB3,CACNB4,CADM1,CALM1,CAMK2A,CAMK2B,CAMK2D,CAMK2G,CDC42,CDH10,CDH11,CDH13,CDH2,CDH6,CDK5,CFL1,CHN1,CLASP2,CNTNAP1,CNTNAP2,CPLX1,CPLX2,CRK,CRKL,CTNNB1,CTNND1,DLG4,DNAJC5,EFNB2,EPHA4,EPHB2,EPHB6,FARP1,FYN,GPAA1,GRB2,GRIA…
	GAIT Translation Signaling Pathway	63.6	0.582	AIMP1,AIMP2,ALB,APOA1,APOA2,APOA4,APOB,APOC3,APOD,APOE,APOL2,CDK5,CLU,CP,DARS1,EEF1E1,EIF1AX,EIF2B1,EIF2B2,EIF2B3,EIF2B4,EIF2B5,EIF2S1,EIF2S2,EIF2S3,EIF3A,EIF3B,EIF3D,EIF3E,EIF3F,EIF3G,EIF3H,EIF3I,EIF3J,EIF3K,EIF3L,EIF3M,EIF4A1,EIF4A2,EIF4A3,EIF4E,EIF4G1,EIF4G2,EIF4G3,EPRS1,GAPDH,HNRNPA2B1,HNRNPL,IARS1,ILF3,KARS1,KGD4,LARS1,LARS2,MAPK1,MARS1,MLST8,MRPS12,MRPS15,MRPS16,MRPS17,MRPS18A,MRPS18B,MRPS2…
	EIF2 Signaling	59.1	0.552	ACTA2,ACTB,AKT1,AKT3,EIF1AX,EIF2A,EIF2AK2,EIF2B1,EIF2B2,EIF2B3,EIF2B4,EIF2B5,EIF2S1,EIF2S2,EIF2S3,EIF3A,EIF3B,EIF3D,EIF3E,EIF3F,EIF3G,EIF3H,EIF3I,EIF3J,EIF3K,EIF3L,EIF3M,EIF4A1,EIF4A2,EIF4A3,EIF4E,EIF4G1,EIF4G2,EIF4G3,EIF5,EIF5B,GRB2,GSK3B,HNRNPA1,HRAS,HSPA5,KGD4,KRAS,MAP2K1,MAP2K2,MAPK1,MAPK3,MRAS,MRPS12,MRPS15,MRPS16,MRPS17,MRPS18A,MRPS18B,MRPS2,MRPS22,MRPS23,MRPS25,MRPS26,MRPS27,MRPS31,MRPS34,…
	Eukaryotic Translation Initiation	52.2	0.609	CP,EIF1AX,EIF2B1,EIF2B2,EIF2B3,EIF2B4,EIF2B5,EIF2S1,EIF2S2,EIF2S3,EIF3A,EIF3B,EIF3D,EIF3E,EIF3F,EIF3G,EIF3H,EIF3I,EIF3J,EIF3K,EIF3L,EIF3M,EIF4A1,EIF4A2,EIF4B,EIF4E,EIF4G1,EIF4H,EIF5,EIF5B,KGD4,MRPS12,MRPS15,MRPS16,MRPS17,MRPS18A,MRPS18B,MRPS2,MRPS22,MRPS23,MRPS25,MRPS26,MRPS27,MRPS31,MRPS34,MRPS35,MRPS5,MRPS7,PABPC1,RACK1,RPL10,RPL10A,RPL11,RPL12,RPL13,RPL13A,RPL14,RPL15,RPL17,RPL18,RPL18A,RPL19,…
	Estrogen Receptor Signaling	52	0.453	ADCY1,ADCY2,ADCY5,ADCY9,AGT,AKT1,AKT3,ATP5F1A,ATP5F1B,ATP5F1C,ATP5F1D,ATP5F1E,ATP5PB,ATP5PF,CACNA1A,CACNA1B,CACNA1E,CACNA2D1,CACNA2D2,CACNA2D3,CACNB1,CACNB3,CACNB4,CACNG2,CACNG3,CACNG8,CARM1,CAV1,CFL1,CFL2,COXFA4,CTBP1,CTBP2,CYC1,DDX5,DLG4,EGFR,EIF2B1,EIF2B2,EIF2B3,EIF2B4,EIF2B5,EIF4E,GNA11,GNA13,GNAI1,GNAI2,GNAI3,GNAL,GNAO1,GNAQ,GNAS,GNAZ,GNB1,GNB2,GNB4,GNB5,GNG10,GNG12,GNG13,GNG2,GNG3,GNG4,GNG5…
	mTOR Signaling	49.7	0.554	AKT1,AKT3,CDC42,DGKZ,EIF3A,EIF3B,EIF3D,EIF3E,EIF3F,EIF3G,EIF3H,EIF3I,EIF3J,EIF3K,EIF3L,EIF3M,EIF4A1,EIF4A2,EIF4A3,EIF4B,EIF4E,EIF4G1,EIF4G2,EIF4G3,FKBP1A,FNBP1,HRAS,KGD4,KRAS,MAPK1,MAPK3,MLST8,MRAS,MRPS12,MRPS15,MRPS16,MRPS17,MRPS18A,MRPS18B,MRPS2,MRPS22,MRPS23,MRPS25,MRPS26,MRPS27,MRPS31,MRPS34,MRPS35,MRPS5,MRPS7,MTOR,NAPEPLD,PDPK1,PIK3C3,PIK3CB,PIK3R1,PIK3R4,PLD3,PPM1L,PPP2CA,PPP2CB,PPP2R1A,PPP…
	Huntington's Disease Signaling	49.2	0.512	AKT1,AKT3,AP2A2,ARFIP2,ATP5F1A,ATP5F1B,ATP5F1C,ATP5F1D,ATP5F1E,ATP5PB,ATP5PF,BAX,CACNA1B,CAPN1,CAPN2,CAPN5,CAPNS1,CDK5,CLTA,CLTB,CLTC,CPLX2,CTSD,CYCS,DCTN1,DLG4,DNAJB1,DNAJC5,DNM1,DNM1L,DNM2,DNM3,DYNC1I2,EGFR,GLS,GNA11,GNAQ,GNB1,GNB2,GNB4,GNB5,GNG10,GNG12,GNG13,GNG2,GNG3,GNG4,GNG5,GNG7,GPAA1,GRB2,GRIN2B,GRM1,GRM5,HDAC11,HDAC2,HDAC6,HIP1,HRAS,HSPA1B,HSPA2,HSPA4,HSPA5,HSPA8,HSPA9,HTT,ITPR1,MAP2K4,M…
