# Supplementary material for: Deficient de-S-acylation in aging and CLN1 contributes to lyso-mitochondrial dysfunction, lipid dyshomeostasis, and resultant lipofuscin biogenesis
Source: Research Square preprint supplement (doi:10.21203/rs.3.rs-8770768/v1), 2026-02-09
Supplement: Supplementary file 4 [file d1fcb9a3271cf882afd9287e.xlsx]

## Sheet: Description
Title: Deficient de-S-acylation in aging and CLN1 contributes to lyso-mitochondrial dysfunction, lipid dyshomeostasis, and resultant lipofuscin biogenesis
Authors: Sofia Massaro Tieze, Alexander Esqueda, Rachel McAllister, Matija Lagator, Betül Yücel, Eric Sun, TuKiet T. Lam, Nicholas Lockyer, Kallol Gupta, Sreeganga S. Chandra
Data Description: This file contains the underlying numerical data for all graphical figures that are not otherwise captured in additional supplementary data files.

## Sheet: Fig 1A 
Data Description: Fig. 1A Kaplan-Meier Survival of WT and Ppt1-/- (KO) Mice.
	Graphed Data					Summary Data				Curve Comparison
	Animal Identifier	Age (Months)	Ppt1-/- (KO)	WT		Genotype	Sample Size	Median Survival (Months)		Statistical Test	Log-rank (Mantel-Cox) test
	825	7.8904	1			Ppt1-/- (KO)	31	7.2328		Chi square	164.2
	824	7.66027	1			WT	26	16.4548		df	3
	803	5.42465	1							P value	<0.0001
	782	7.3315	1							P value summary	****
	786	7.3315	1							Are the survival curves sig different?	Yes
	777	7.95616	1
	779	7.95616	1
	788	7.13424	1
	774	7.82465	1
	778	7.52876	1
	796	3.45202	1
	771	5.16159	1
	767	6.47664	1
	742	5.32597	1
	729	5.72049	1
	726	7.03554	1
	713	6.93691	1
	707	7.2328	1
	704	8.12046	1
	694	7.2328	1
	691	7.2328	1
	684	7.62731	1
	672	2.926	1
	658	4.83282	1
possible +/-	656	16.8327	1
	637	6.87116	1
	335	7.98895	1
	324	7.10129	1
	261	9.59989	1
	254	6.27938	1
	243	9.07387	1
	517	4.63561		1
	538	30.5425		1
	556	23.7699		1
	557	24.8548		1
	596	18.3781		1
	610	16.4712		1
	612	1.90685		1
	613	16.3726		1
	616	13.1836		1
	647	15.8466		1
	652	26.9589		1
	676	6.73972		1
	734	3.97808		1
	812	15.6822		1
	813	15.6822		1
	814	15.6822		1
	826	16.4383		1
	860	14.2356		1
	B6	12.1973		1
	B6	23.211		1
	873	20.515		1
	868	21.6329		1
	869	21.6329		1
	B6	18.8383		1
	842	24.1972		1
	846	23.7041		1

## Sheet: Fig 1C + 1E
Data Description: Fig. 1C + 1E. Lipofuscin loads by whole brain and gross anatomical region
						Fig. 1C. Simple Linear Regression
Fig. 1C. Lipofuscin Load - Whole Brain
PPT1-2	0.178326	0.27056	0.204379	0.300377		Best-fit values				Std. Error				95% Confidence Intervals
PPT1-4	0.562232	0.552302	0.598448	0.495146			PPT1 KO	WT			PPT1 KO	WT			PPT1 KO		WT
PPT1-7	0.840843	0.829918	0.762933	0.822264		Slope	0.1129	0.01025		Slope	0.008555	0.0005552		Slope	0.09386 to 0.1320		0.009064 to 0.01145
WT-2	0.00640625	0.00382275	0.0111263	0.005255		Y-intercept	0.04549	-0.01841		Y-intercept	0.04103	0.008987		Y-intercept	-0.04594 to 0.1369		-0.03768 to 0.0008683
WT-12	0.085304	0.108956	0.101771	0.107133		X-intercept	-0.4028	1.795						X-intercept	-1.437 to 0.3533		-0.09413 to 3.350
WT-18	0.150266	0.127524	0.160779	0.19026		1/slope	8.856	97.52		Goodness of Fit
WT-24	0.210339	0.262769	0.239371	0.231451							PPT1 KO	WT			PPT1 KO		WT
										R squared	0.9457	0.9606		Equation	Y = 0.1129*X + 0.04549		Y = 0.01025*X - 0.01841
										Sy.x	0.0609	0.01804
Fig. 1E QUINT Custom Region Loads per Biological Replicate	PPT1-2				PPT1-4				PPT1-7				WT-2				WT-12				WT-18				WT-24
Cortex	0.037607	0.0466512	0.038598	0.0478317	0.0763625	0.0815675	0.0807143	0.0697933	0.114264	0.12474	0.102525	0.107045	0.0003075	0.0007105	0.000767	0.00056	0.017036	0.0217693	0.0176328	0.0203635	0.0296035	0.0208005	0.0280065	0.0273203	0.0369157	0.0440427	0.0357097	0.0350082
Fibretracts	0.0093135	0.0160223	0.0116587	0.0155998	0.0351513	0.0303855	0.0385285	0.0227565	0.060462	0.0581098	0.0456537	0.0608347	0.0007465	0.00047425	0.00163775	0.00035575	0.0060155	0.00655425	0.006601	0.00680025	0.00844525	0.009021	0.0102503	0.0093655	0.0121867	0.013199	0.0136218	0.012667
Hippo	0.0241717	0.0275025	0.0230087	0.034877	0.0527605	0.0537107	0.0531298	0.0434022	0.067854	0.0700998	0.0604835	0.0713253	0.0004625	0.00023525	0.00071775	0.00033325	0.00619525	0.006398	0.00724325	0.00777725	0.0125492	0.00978075	0.0115717	0.0145092	0.016171	0.0204012	0.0162575	0.016532
Olfactory	0.0147265	0.024785	0.0214048	0.025687	0.0650265	0.06391	0.0743825	0.0411467	0.100822	0.107726	0.0939345	0.0897162	0.00167725	0.000437	0.0015685	0.00025925	0.00591475	0.00779975	0.0073305	0.0061795	0.009976	0.00798075	0.0079725	0.0111958	0.0128855	0.0165935	0.0154802	0.0124543
Hypothalamus	0.0143292	0.0325095	0.0194605	0.0332763	0.0705125	0.0725015	0.0769488	0.0518775	0.101018	0.0902685	0.089975	0.0790628	0.00053575	0.00029625	0.0005115	0.000288	0.0145215	0.0219918	0.0232072	0.0206797	0.0258057	0.0293948	0.0333873	0.038062	0.0444502	0.0501715	0.0487033	0.052841
Striatum_Pallidum	0.0155165	0.0287243	0.018304	0.035664	0.0640532	0.0629497	0.0784875	0.0559885	0.0834697	0.0853375	0.08592	0.088996	0.0002025	0.00020375	0.0003925	0.00046875	0.00604075	0.009329	0.0091705	0.007454	0.016059	0.0123655	0.0180188	0.016473	0.0212127	0.0284895	0.0250177	0.0275785
Mid_Hind_Medulla	0.0179445	0.0269342	0.0209522	0.030044	0.0624372	0.0586365	0.0629207	0.0577382	0.0873562	0.0871408	0.0813575	0.0869333	0.0008145	0.00061975	0.0008995	0.00067175	0.0100897	0.0123617	0.0102942	0.01412	0.018769	0.0151105	0.019283	0.024354	0.0249805	0.031863	0.0306585	0.028101
Thalamus	0.0323465	0.0452505	0.0370383	0.0579305	0.0827605	0.085967	0.0837023	0.0858712	0.11627	0.114324	0.109318	0.124657	0.00091775	0.00052375	0.00129075	0.0014445	0.00978175	0.0137725	0.0125635	0.0103973	0.0169173	0.0150315	0.02162	0.0315518	0.0271075	0.0341655	0.037966	0.0318302
Cerebellum	0.00761275	0.018328	0.0119243	0.0151345	0.045984	0.0368482	0.0446882	0.0566847	0.081696	0.0808602	0.0876072	0.106724	0.000633	0.00023525	0.00286	0.00032325	0.0076655	0.006796	0.005978	0.0114525	0.0081275	0.006355	0.00809967	0.0144495	0.0118908	0.0184398	0.0133722	0.0129885
VentricularSystem	0.0047575	0.003853	0.00203	0.0043325	0.00718375	0.00582575	0.0049455	0.0098875	0.027631	0.011311	0.0061575	0.00697075	0.000109	8.7e-05	0.000481	0.0005505	0.00204325	0.002184	0.00175025	0.0019095	0.0040135	0.0016835	0.0025695	0.00297925	0.00253825	0.0054035	0.00258375	0.0014505
Fig 1E. QUINT Custom Region Load Average	PPT1-2	PPT1-4	PPT1-7	WT-2	WT-12	WT-18	WT-24
CTX	0.042672	0.0771094	0.112144	0.00058625	0.0192004	0.0264327	0.0379191
OLF	0.0131486	0.0317054	0.0562651	0.000803563	0.00649275	0.0092705	0.0129186
HPF	0.02739	0.0507508	0.0674406	0.000437188	0.00690344	0.0121027	0.0173404
STR/PAL	0.0216508	0.0611164	0.0980498	0.0009855	0.00680612	0.00928125	0.0143534
TH	0.0248939	0.0679601	0.0900811	0.000407875	0.0201001	0.0316624	0.0490415
HY	0.0245522	0.0653697	0.0859308	0.000316875	0.00799856	0.0157291	0.0255746
MB/P/MY	0.0239688	0.0604332	0.0856969	0.000751375	0.0117164	0.0193791	0.0289007
CB	0.0431414	0.0845753	0.116142	0.00104419	0.0116288	0.0212801	0.0327673
FT	0.0132499	0.0460513	0.0892219	0.00101288	0.007973	0.00925792	0.0141728
VS	0.00374325	0.00696062	0.0130176	0.000306875	0.00197175	0.00281144	0.002994

## Sheet: Fig 1D + Fig S1A
Data Description: Fig. 1D + S1A. Lipofuscin loads by fine anatomical region quantified by QUINT. Rows with no values indicate regions that were not measured. These are represented in gray in coronal heatmaps and in white in the traditional heatmap. Further in traditional heatmap, rows with no values were excluded from graph unless the region was measured in at least 2 mice for that row.
Original Order	Primary Annotation	Secondary Annotation	Tertiary Annotation	Region ID	Region Name	PPT1-2 Average Load Set 1	PPT1-2 Average Load Set 2	PPT1-2 Average Load Set 3	PPT1-2 Average Load Set 4	PPT1-4 Average Load Set 1	PPT1-4 Average Load Set 2	PPT1-4 Average Load Set 3	PPT1-4 Average Load Set 4	PPT1-7 Average Load Set 1	PPT1-7 Average Load Set 2	PPT1-7 Average Load Set 3	PPT1-7 Average Load Set 4	WT-2 Average Load Set 1	WT-2 Average Load Set 2	WT-2 Average Load Set 3	WT-2 Average Load Set 4	WT-12 Average Load Set 1	WT-12 Average Load Set 2	WT-12 Average Load Set 3	WT-12 Average Load Set 4	WT-18 Average Load Set 1	WT-18 Average Load Set 2	WT-18 Average Load Set 3	WT-18 Average Load Set 4	WT-24 Average Load Set 1	WT-24 Average Load Set 2	WT-24 Average Load Set 3	WT-24 Average Load Set 4
1	Clear Label	Clear Label	Clear Label	0	Clear Label	#DIV/0!	#DIV/0!	#DIV/0!	#DIV/0!	#DIV/0!	#DIV/0!	#DIV/0!	#DIV/0!	0.0831814	#DIV/0!	#DIV/0!	#DIV/0!	#DIV/0!	#DIV/0!	#DIV/0!	#DIV/0!	#DIV/0!	#DIV/0!	#DIV/0!	#DIV/0!	#DIV/0!	#DIV/0!	#DIV/0!	#DIV/0!	#DIV/0!	#DIV/0!	#DIV/0!	#DIV/0!
2	root	root	root	997	root	0.00711543	0.00510448	0.00355081	0.00705037	0.00992346	0.0102377	0.0131219	0.016374	0.020733	0.0242457	0.00714718	0.0212469	0.000414823	0.000273302	0.000620824	0.000698904	0.00314921	0.00336338	0.00238805	0.00572426	0.00860499	0.00801722	0.00338681	0.00659408	0.0120097	0.00649871	0.00450441	0.00574516
3	Basic	Basic	Basic	8	Basic cell groups and regions	#DIV/0!	#DIV/0!	#DIV/0!	#DIV/0!	#DIV/0!	#DIV/0!	#DIV/0!	#DIV/0!	#DIV/0!	#DIV/0!	#DIV/0!	#DIV/0!	#DIV/0!	#DIV/0!	#DIV/0!	#DIV/0!	#DIV/0!	#DIV/0!	#DIV/0!	#DIV/0!	#DIV/0!	#DIV/0!	#DIV/0!	#DIV/0!	#DIV/0!	#DIV/0!	#DIV/0!	#DIV/0!
4	CH	CH	CH	567	Cerebrum	#DIV/0!	#DIV/0!	#DIV/0!	#DIV/0!	#DIV/0!	#DIV/0!	#DIV/0!	#DIV/0!	#DIV/0!	#DIV/0!	#DIV/0!	#DIV/0!	#DIV/0!	#DIV/0!	#DIV/0!	#DIV/0!	#DIV/0!	#DIV/0!	#DIV/0!	#DIV/0!	#DIV/0!	#DIV/0!	#DIV/0!	#DIV/0!	#DIV/0!	#DIV/0!	#DIV/0!	#DIV/0!
5	CTX	CTX	CTX	688	Cerebral cortex	#DIV/0!	#DIV/0!	#DIV/0!	#DIV/0!	#DIV/0!	#DIV/0!	#DIV/0!	#DIV/0!	#DIV/0!	#DIV/0!	#DIV/0!	#DIV/0!	#DIV/0!	#DIV/0!	#DIV/0!	#DIV/0!	#DIV/0!	#DIV/0!	#DIV/0!	#DIV/0!	#DIV/0!	#DIV/0!	#DIV/0!	#DIV/0!	#DIV/0!	#DIV/0!	#DIV/0!	#DIV/0!
6	CTX	CTXpl	CTXpl	695	Cortical plate	#DIV/0!	#DIV/0!	#DIV/0!	#DIV/0!	#DIV/0!	#DIV/0!	#DIV/0!	#DIV/0!	#DIV/0!	#DIV/0!	#DIV/0!	#DIV/0!	#DIV/0!	#DIV/0!	#DIV/0!	#DIV/0!	#DIV/0!	#DIV/0!	#DIV/0!	#DIV/0!	#DIV/0!	#DIV/0!	#DIV/0!	#DIV/0!	#DIV/0!	#DIV/0!	#DIV/0!	#DIV/0!
7	CTX	Isocortex	Isocortex	315	Isocortex	#DIV/0!	#DIV/0!	#DIV/0!	#DIV/0!	#DIV/0!	#DIV/0!	#DIV/0!	#DIV/0!	#DIV/0!	#DIV/0!	#DIV/0!	#DIV/0!	#DIV/0!	#DIV/0!	#DIV/0!	#DIV/0!	#DIV/0!	#DIV/0!	#DIV/0!	#DIV/0!	#DIV/0!	#DIV/0!	#DIV/0!	#DIV/0!	#DIV/0!	#DIV/0!	#DIV/0!	#DIV/0!
8	CTX	FRP	FRP	184	Frontal pole, cerebral cortex	#DIV/0!	#DIV/0!	#DIV/0!	#DIV/0!	#DIV/0!	#DIV/0!	#DIV/0!	#DIV/0!	#DIV/0!	#DIV/0!	#DIV/0!	#DIV/0!	#DIV/0!	#DIV/0!	#DIV/0!	#DIV/0!	#DIV/0!	#DIV/0!	#DIV/0!	#DIV/0!	#DIV/0!	#DIV/0!	#DIV/0!	#DIV/0!	#DIV/0!	#DIV/0!	#DIV/0!	#DIV/0!
9	CTX	FRP	FRP1	68	Frontal pole, layer 1	0.00814084	0.00186807	0.00470111	0.00212446	0.0177372	0.0104025	0.0221964	0.0100361	0.0820925	0.0758143	0.0559734	0.0658522	#DIV/0!	0.00093499	#DIV/0!	#DIV/0!	0.00456103	0.00599987	0.00388689	0.00293377	0.00203775	0.00383939	0.00928591	0.00559726	0.00925685	0.0129603	0.00501724	0.00382649
10	CTX	FRP	FRP2/3	667	Frontal pole, layer 2/3	0.0254006	0.02414	0.0234811	0.0222724	0.0645128	0.0524942	0.063036	0.0602788	0.105741	0.125333	0.0970269	0.108399	#DIV/0!	0.00081917	0.000312768	0.000160693	0.0121938	0.0177518	0.014912	0.0150802	0.012414	0.0247885	0.0169437	0.0214526	0.0363064	0.0378679	0.0263002	0.0222326
11	CTX	FRP	FRP5	526157192	Frontal pole, layer 5	0.016444	0.0265926	0.0224337	0.0266046	0.0564383	0.050832	0.0558516	0.0625278	0.13306	0.107775	0.0803727	0.0956998	0.000960289	0.000244096	0.000382681	0.0010895	0.0101432	0.0222573	0.0151071	0.0162951	0.0138594	0.0249889	0.0216014	0.0232546	0.0367962	0.0324881	0.0305316	0.0253508
12	CTX	FRP	FRP6a	526157196	Frontal pole, layer 6a	0.0351976	0.0365256	0.0313862	0.0519244	0.0610749	0.0590867	0.0747609	0.0600915	1.30515	0.0707731	0.0891358	0.102263	#DIV/0!	0.00159311	0.000921847	#DIV/0!	0.0198651	0.0168438	0.0226713	0.0154274	0.0200281	0.0332383	0.0242536	0.0273301	0.0419352	0.0493421	0.0452389	0.035796
13	CTX	FRP	FRP6b	526322264	Frontal pole, layer 6b	0.00801644	#DIV/0!	#DIV/0!	#DIV/0!	0.0980076	#DIV/0!	0.139657	#DIV/0!	#DIV/0!	#DIV/0!	0.0921105	0.136943	#DIV/0!	#DIV/0!	#DIV/0!	#DIV/0!	#DIV/0!	0.0211504	#DIV/0!	#DIV/0!	0.113918	0.013626	#DIV/0!	0.0771165	0.098332	#DIV/0!	#DIV/0!	#DIV/0!
14	CTX	MO	MO5	500	Somatomotor areas	#DIV/0!	#DIV/0!	#DIV/0!	#DIV/0!	#DIV/0!	#DIV/0!	#DIV/0!	#DIV/0!	#DIV/0!	#DIV/0!	#DIV/0!	#DIV/0!	#DIV/0!	#DIV/0!	#DIV/0!	#DIV/0!	#DIV/0!	#DIV/0!	#DIV/0!	#DIV/0!	#DIV/0!	#DIV/0!	#DIV/0!	#DIV/0!	#DIV/0!	#DIV/0!	#DIV/0!	#DIV/0!
15	CTX	MO	MO1	107	Somatomotor areas, Layer 1	#DIV/0!	#DIV/0!	#DIV/0!	#DIV/0!	#DIV/0!	#DIV/0!	#DIV/0!	#DIV/0!	#DIV/0!	#DIV/0!	#DIV/0!	#DIV/0!	#DIV/0!	#DIV/0!	#DIV/0!	#DIV/0!	#DIV/0!	#DIV/0!	#DIV/0!	#DIV/0!	#DIV/0!	#DIV/0!	#DIV/0!	#DIV/0!	#DIV/0!	#DIV/0!	#DIV/0!	#DIV/0!
16	CTX	MO	MO2/3	219	Somatomotor areas, Layer 2/3	#DIV/0!	#DIV/0!	#DIV/0!	#DIV/0!	#DIV/0!	#DIV/0!	#DIV/0!	#DIV/0!	#DIV/0!	#DIV/0!	#DIV/0!	#DIV/0!	#DIV/0!	#DIV/0!	#DIV/0!	#DIV/0!	#DIV/0!	#DIV/0!	#DIV/0!	#DIV/0!	#DIV/0!	#DIV/0!	#DIV/0!	#DIV/0!	#DIV/0!	#DIV/0!	#DIV/0!	#DIV/0!
17	CTX	MO	MO5	299	Somatomotor areas, Layer 5	#DIV/0!	#DIV/0!	#DIV/0!	#DIV/0!	#DIV/0!	#DIV/0!	#DIV/0!	#DIV/0!	#DIV/0!	#DIV/0!	#DIV/0!	#DIV/0!	#DIV/0!	#DIV/0!	#DIV/0!	#DIV/0!	#DIV/0!	#DIV/0!	#DIV/0!	#DIV/0!	#DIV/0!	#DIV/0!	#DIV/0!	#DIV/0!	#DIV/0!	#DIV/0!	#DIV/0!	#DIV/0!
18	CTX	MO	MO6a	644	Somatomotor areas, Layer 6a	#DIV/0!	#DIV/0!	#DIV/0!	#DIV/0!	#DIV/0!	#DIV/0!	#DIV/0!	#DIV/0!	#DIV/0!	#DIV/0!	#DIV/0!	#DIV/0!	#DIV/0!	#DIV/0!	#DIV/0!	#DIV/0!	#DIV/0!	#DIV/0!	#DIV/0!	#DIV/0!	#DIV/0!	#DIV/0!	#DIV/0!	#DIV/0!	#DIV/0!	#DIV/0!	#DIV/0!	#DIV/0!
19	CTX	MO	MO6b	947	Somatomotor areas, Layer 6b	#DIV/0!	#DIV/0!	#DIV/0!	#DIV/0!	#DIV/0!	#DIV/0!	#DIV/0!	#DIV/0!	#DIV/0!	#DIV/0!	#DIV/0!	#DIV/0!	#DIV/0!	#DIV/0!	#DIV/0!	#DIV/0!	#DIV/0!	#DIV/0!	#DIV/0!	#DIV/0!	#DIV/0!	#DIV/0!	#DIV/0!	#DIV/0!	#DIV/0!	#DIV/0!	#DIV/0!	#DIV/0!
20	CTX	MO	MOp	985	Primary motor area	#DIV/0!	#DIV/0!	#DIV/0!	#DIV/0!	#DIV/0!	#DIV/0!	#DIV/0!	#DIV/0!	#DIV/0!	#DIV/0!	#DIV/0!	#DIV/0!	#DIV/0!	#DIV/0!	#DIV/0!	#DIV/0!	#DIV/0!	#DIV/0!	#DIV/0!	#DIV/0!	#DIV/0!	#DIV/0!	#DIV/0!	#DIV/0!	#DIV/0!	#DIV/0!	#DIV/0!	#DIV/0!
21	CTX	MO	MOp1	320	Primary motor area, Layer 1	0.00613318	0.0120751	0.00772817	0.0123721	0.0245461	0.0314829	0.0241073	0.0151313	0.0471566	0.107764	0.0562579	0.0674647	0.000270625	0.000966843	#DIV/0!	0.000203243	0.00986681	0.00788193	0.00466963	0.00799846	0.00765622	0.00476738	0.011125	0.00641853	0.00620439	0.00840269	0.00801793	0.00908714
22	CTX	MO	MOp2/3	943	Primary motor area, Layer 2/3	0.0411449	0.0502573	0.0489464	0.0557271	0.0796699	0.0765672	0.0857405	0.0751396	0.13353	0.152918	0.131166	0.146902	0.000186479	#DIV/0!	0.000443175	0.000192953	0.0257819	0.0200937	0.013122	0.0171954	0.0181527	0.0217706	0.0193097	0.0163188	0.0319564	0.0367721	0.0273741	0.036289
23	CTX	MO	MOp5	648	Primary motor area, Layer 5	0.0321094	0.0527154	0.048262	0.0632454	0.0792503	0.116883	0.0788051	0.0698664	0.116736	0.134545	0.110882	0.115504	0.000334749	0.000502694	0.00106946	0.000274996	0.0296783	0.0293328	0.0212211	0.0304789	0.0278251	0.0341605	0.0322467	0.0315359	0.0395839	0.0557823	0.0391138	0.0362608
24	CTX	MO	MOp6a	844	Primary motor area, Layer 6a	0.0410451	0.0613149	0.0601951	0.0652336	0.0820609	0.111695	0.0913463	0.0662452	0.501384	#DIV/0!	0.109996	0.103926	0.000463712	0.00119394	0.00177646	0.000686005	0.0260924	0.0295919	0.0336072	0.0416954	0.0365491	0.0448647	0.0437964	0.0382479	0.0488094	0.0561199	0.0394767	0.0493236
25	CTX	MO	MOp6b	882	Primary motor area, Layer 6b	0.0245378	0.0683462	0.046239	0.0781462	0.0834227	0.0901885	0.0792635	0.0294867	0.0455384	#DIV/0!	0.101886	0.0861811	0.000449302	0.00101845	0.00414126	0.00373166	0.0070442	0.0159731	0.0492319	0.0352908	0.021916	0.0149921	0.0567312	0.0256039	0.0489929	0.00652677	0.0250752	0.0493332
26	CTX	MO	MOs	993	Secondary motor area	#DIV/0!	#DIV/0!	#DIV/0!	#DIV/0!	#DIV/0!	#DIV/0!	#DIV/0!	#DIV/0!	#DIV/0!	#DIV/0!	#DIV/0!	#DIV/0!	#DIV/0!	#DIV/0!	#DIV/0!	#DIV/0!	#DIV/0!	#DIV/0!	#DIV/0!	#DIV/0!	#DIV/0!	#DIV/0!	#DIV/0!	#DIV/0!	#DIV/0!	#DIV/0!	#DIV/0!	#DIV/0!
27	CTX	MO	MOs1	656	Secondary motor area, layer 1	0.0124144	0.00793721	0.00955454	0.00597429	0.0218507	0.0231602	0.0258959	0.0143689	0.0697343	0.0754712	0.0462883	0.0706227	0.00013885	0.000132173	8.06899e-05	0.000168273	0.00394672	0.00694347	0.00527828	0.00588689	0.00518051	0.00599642	0.00493541	0.00834336	0.00717496	0.00890211	0.00642338	0.00524586
28	CTX	MO	MOs2/3	962	Secondary motor area, layer 2/3	0.0408455	0.0404772	0.0331408	0.0406205	0.068556	0.0868388	0.0792039	0.0687074	0.121096	0.133314	0.112831	0.122927	0.000136521	0.000313231	9.92099e-05	0.000111142	0.0152263	0.0180974	0.0142699	0.0228328	0.0181772	0.0278113	0.0260587	0.023236	0.0330972	0.0410624	0.0309508	0.0255426
29	CTX	MO	MOs5	767	Secondary motor area, layer 5	0.0342144	0.0408229	0.037674	0.0411404	0.0649411	0.0792183	0.0655609	0.0618389	0.120963	0.12032	0.0967365	0.0995727	0.000173078	0.000756693	0.000369526	0.000529617	0.0202927	0.0230254	0.0192087	0.0237783	0.0206492	0.0323025	0.0443889	0.0262898	0.0380099	0.0447687	0.0397823	0.0302959
30	CTX	MO	MOs6a	1021	Secondary motor area, layer 6a	0.0376738	0.0456643	0.0498688	0.0452084	0.0749166	0.0933531	0.0819235	0.0722343	0.674619	0.135081	0.102226	0.109541	0.000182158	0.000846704	0.00135803	0.00072572	0.0236747	0.0243362	0.0201389	0.019137	0.0280494	0.0326614	0.0339159	0.0294668	0.0423544	0.049819	0.0379273	0.0338191
31	CTX	MO	MOs6b	1085	Secondary motor area, layer 6b	0.0138775	0.0664356	0.046446	0.0525192	0.0868674	0.0564308	0.07761	0.0374374	0.0611076	0.115517	0.0929469	0.0638016	#DIV/0!	0.00306517	0.00405658	0.00137116	0.00712712	0.0125452	0.03389	0.0175238	0.0373485	0.00980546	0.0624825	0.0197605	0.0407931	0.0235102	0.0338916	0.0417406
32	CTX	SS	SS	453	Somatosensory areas	#DIV/0!	#DIV/0!	#DIV/0!	#DIV/0!	#DIV/0!	#DIV/0!	#DIV/0!	#DIV/0!	#DIV/0!	#DIV/0!	#DIV/0!	#DIV/0!	#DIV/0!	#DIV/0!	#DIV/0!	#DIV/0!	#DIV/0!	#DIV/0!	#DIV/0!	#DIV/0!	#DIV/0!	#DIV/0!	#DIV/0!	#DIV/0!	#DIV/0!	#DIV/0!	#DIV/0!	#DIV/0!
33	CTX	SS	SS1	12993	Somatosensory areas, layer 1	#DIV/0!	#DIV/0!	#DIV/0!	#DIV/0!	#DIV/0!	#DIV/0!	#DIV/0!	#DIV/0!	#DIV/0!	#DIV/0!	#DIV/0!	#DIV/0!	#DIV/0!	#DIV/0!	#DIV/0!	#DIV/0!	#DIV/0!	#DIV/0!	#DIV/0!	#DIV/0!	#DIV/0!	#DIV/0!	#DIV/0!	#DIV/0!	#DIV/0!	#DIV/0!	#DIV/0!	#DIV/0!
34	CTX	SS	SS2/3	12994	Somatosensory areas, layer 2/3	#DIV/0!	#DIV/0!	#DIV/0!	#DIV/0!	#DIV/0!	#DIV/0!	#DIV/0!	#DIV/0!	#DIV/0!	#DIV/0!	#DIV/0!	#DIV/0!	#DIV/0!	#DIV/0!	#DIV/0!	#DIV/0!	#DIV/0!	#DIV/0!	#DIV/0!	#DIV/0!	#DIV/0!	#DIV/0!	#DIV/0!	#DIV/0!	#DIV/0!	#DIV/0!	#DIV/0!	#DIV/0!
35	CTX	SS	SS4	12995	Somatosensory areas, layer 4	#DIV/0!	#DIV/0!	#DIV/0!	#DIV/0!	#DIV/0!	#DIV/0!	#DIV/0!	#DIV/0!	#DIV/0!	#DIV/0!	#DIV/0!	#DIV/0!	#DIV/0!	#DIV/0!	#DIV/0!	#DIV/0!	#DIV/0!	#DIV/0!	#DIV/0!	#DIV/0!	#DIV/0!	#DIV/0!	#DIV/0!	#DIV/0!	#DIV/0!	#DIV/0!	#DIV/0!	#DIV/0!
36	CTX	SS	SS5	12996	Somatosensory areas, layer 5	#DIV/0!	#DIV/0!	#DIV/0!	#DIV/0!	#DIV/0!	#DIV/0!	#DIV/0!	#DIV/0!	#DIV/0!	#DIV/0!	#DIV/0!	#DIV/0!	#DIV/0!	#DIV/0!	#DIV/0!	#DIV/0!	#DIV/0!	#DIV/0!	#DIV/0!	#DIV/0!	#DIV/0!	#DIV/0!	#DIV/0!	#DIV/0!	#DIV/0!	#DIV/0!	#DIV/0!	#DIV/0!
37	CTX	SS	SS6a	12997	Somatosensory areas, layer 6a	#DIV/0!	#DIV/0!	#DIV/0!	#DIV/0!	#DIV/0!	#DIV/0!	#DIV/0!	#DIV/0!	#DIV/0!	#DIV/0!	#DIV/0!	#DIV/0!	#DIV/0!	#DIV/0!	#DIV/0!	#DIV/0!	#DIV/0!	#DIV/0!	#DIV/0!	#DIV/0!	#DIV/0!	#DIV/0!	#DIV/0!	#DIV/0!	#DIV/0!	#DIV/0!	#DIV/0!	#DIV/0!
38	CTX	SS	SS6b	12998	Somatosensory areas, layer 6b	#DIV/0!	#DIV/0!	#DIV/0!	#DIV/0!	#DIV/0!	#DIV/0!	#DIV/0!	#DIV/0!	#DIV/0!	#DIV/0!	#DIV/0!	#DIV/0!	#DIV/0!	#DIV/0!	#DIV/0!	#DIV/0!	#DIV/0!	#DIV/0!	#DIV/0!	#DIV/0!	#DIV/0!	#DIV/0!	#DIV/0!	#DIV/0!	#DIV/0!	#DIV/0!	#DIV/0!	#DIV/0!
39	CTX	SS	SSp	322	Primary somatosensory area	#DIV/0!	#DIV/0!	#DIV/0!	#DIV/0!	#DIV/0!	#DIV/0!	#DIV/0!	#DIV/0!	#DIV/0!	#DIV/0!	#DIV/0!	#DIV/0!	#DIV/0!	#DIV/0!	#DIV/0!	#DIV/0!	#DIV/0!	#DIV/0!	#DIV/0!	#DIV/0!	#DIV/0!	#DIV/0!	#DIV/0!	#DIV/0!	#DIV/0!	#DIV/0!	#DIV/0!	#DIV/0!
40	CTX	SS	SSp1	793	Primary somatosensory area, layer 1	#DIV/0!	#DIV/0!	#DIV/0!	#DIV/0!	#DIV/0!	#DIV/0!	#DIV/0!	#DIV/0!	#DIV/0!	#DIV/0!	#DIV/0!	#DIV/0!	#DIV/0!	#DIV/0!	#DIV/0!	#DIV/0!	#DIV/0!	#DIV/0!	#DIV/0!	#DIV/0!	#DIV/0!	#DIV/0!	#DIV/0!	#DIV/0!	#DIV/0!	#DIV/0!	#DIV/0!	#DIV/0!
41	CTX	SS	SSp2/3	346	Primary somatosensory area, layer 2/3	#DIV/0!	#DIV/0!	#DIV/0!	#DIV/0!	#DIV/0!	#DIV/0!	#DIV/0!	#DIV/0!	#DIV/0!	#DIV/0!	#DIV/0!	#DIV/0!	#DIV/0!	#DIV/0!	#DIV/0!	#DIV/0!	#DIV/0!	#DIV/0!	#DIV/0!	#DIV/0!	#DIV/0!	#DIV/0!	#DIV/0!	#DIV/0!	#DIV/0!	#DIV/0!	#DIV/0!	#DIV/0!
42	CTX	SS	SSp4	865	Primary somatosensory area, layer 4	#DIV/0!	#DIV/0!	#DIV/0!	#DIV/0!	#DIV/0!	#DIV/0!	#DIV/0!	#DIV/0!	#DIV/0!	#DIV/0!	#DIV/0!	#DIV/0!	#DIV/0!	#DIV/0!	#DIV/0!	#DIV/0!	#DIV/0!	#DIV/0!	#DIV/0!	#DIV/0!	#DIV/0!	#DIV/0!	#DIV/0!	#DIV/0!	#DIV/0!	#DIV/0!	#DIV/0!	#DIV/0!
43	CTX	SS	SSp5	921	Primary somatosensory area, layer 5	#DIV/0!	#DIV/0!	#DIV/0!	#DIV/0!	#DIV/0!	#DIV/0!	#DIV/0!	#DIV/0!	#DIV/0!	#DIV/0!	#DIV/0!	#DIV/0!	#DIV/0!	#DIV/0!	#DIV/0!	#DIV/0!	#DIV/0!	#DIV/0!	#DIV/0!	#DIV/0!	#DIV/0!	#DIV/0!	#DIV/0!	#DIV/0!	#DIV/0!	#DIV/0!	#DIV/0!	#DIV/0!
44	CTX	SS	SSp6a	686	Primary somatosensory area, layer 6a	#DIV/0!	#DIV/0!	#DIV/0!	#DIV/0!	#DIV/0!	#DIV/0!	#DIV/0!	#DIV/0!	#DIV/0!	#DIV/0!	#DIV/0!	#DIV/0!	#DIV/0!	#DIV/0!	#DIV/0!	#DIV/0!	#DIV/0!	#DIV/0!	#DIV/0!	#DIV/0!	#DIV/0!	#DIV/0!	#DIV/0!	#DIV/0!	#DIV/0!	#DIV/0!	#DIV/0!	#DIV/0!
45	CTX	SS	SSp6b	719	Primary somatosensory area, layer 6b	#DIV/0!	#DIV/0!	#DIV/0!	#DIV/0!	#DIV/0!	#DIV/0!	#DIV/0!	#DIV/0!	#DIV/0!	#DIV/0!	#DIV/0!	#DIV/0!	#DIV/0!	#DIV/0!	#DIV/0!	#DIV/0!	#DIV/0!	#DIV/0!	#DIV/0!	#DIV/0!	#DIV/0!	#DIV/0!	#DIV/0!	#DIV/0!	#DIV/0!	#DIV/0!	#DIV/0!	#DIV/0!
46	CTX	SS	SSp-n	353	Primary somatosensory area, nose	#DIV/0!	#DIV/0!	#DIV/0!	#DIV/0!	#DIV/0!	#DIV/0!	#DIV/0!	#DIV/0!	#DIV/0!	#DIV/0!	#DIV/0!	#DIV/0!	#DIV/0!	#DIV/0!	#DIV/0!	#DIV/0!	#DIV/0!	#DIV/0!	#DIV/0!	#DIV/0!	#DIV/0!	#DIV/0!	#DIV/0!	#DIV/0!	#DIV/0!	#DIV/0!	#DIV/0!	#DIV/0!
47	CTX	SS	SSp-n1	558	Primary somatosensory area, nose, layer 1	#DIV/0!	#DIV/0!	#DIV/0!	#DIV/0!	#DIV/0!	#DIV/0!	#DIV/0!	#DIV/0!	#DIV/0!	#DIV/0!	#DIV/0!	#DIV/0!	#DIV/0!	#DIV/0!	#DIV/0!	#DIV/0!	#DIV/0!	#DIV/0!	#DIV/0!	#DIV/0!	#DIV/0!	#DIV/0!	#DIV/0!	#DIV/0!	#DIV/0!	#DIV/0!	#DIV/0!	#DIV/0!
48	CTX	SS	SSp-n2/3	838	Primary somatosensory area, nose, layer 2/3	#DIV/0!	#DIV/0!	#DIV/0!	#DIV/0!	#DIV/0!	#DIV/0!	#DIV/0!	#DIV/0!	#DIV/0!	#DIV/0!	#DIV/0!	#DIV/0!	#DIV/0!	#DIV/0!	#DIV/0!	#DIV/0!	#DIV/0!	#DIV/0!	#DIV/0!	#DIV/0!	#DIV/0!	#DIV/0!	#DIV/0!	#DIV/0!	#DIV/0!	#DIV/0!	#DIV/0!	#DIV/0!
49	CTX	SS	SSp-n4	654	Primary somatosensory area, nose, layer 4	#DIV/0!	#DIV/0!	#DIV/0!	#DIV/0!	#DIV/0!	#DIV/0!	#DIV/0!	#DIV/0!	#DIV/0!	#DIV/0!	#DIV/0!	#DIV/0!	#DIV/0!	#DIV/0!	#DIV/0!	#DIV/0!	#DIV/0!	#DIV/0!	#DIV/0!	#DIV/0!	#DIV/0!	#DIV/0!	#DIV/0!	#DIV/0!	#DIV/0!	#DIV/0!	#DIV/0!	#DIV/0!
50	CTX	SS	SSp-n5	702	Primary somatosensory area, nose, layer 5	#DIV/0!	#DIV/0!	#DIV/0!	#DIV/0!	#DIV/0!	#DIV/0!	#DIV/0!	#DIV/0!	#DIV/0!	#DIV/0!	#DIV/0!	#DIV/0!	#DIV/0!	#DIV/0!	#DIV/0!	#DIV/0!	#DIV/0!	#DIV/0!	#DIV/0!	#DIV/0!	#DIV/0!	#DIV/0!	#DIV/0!	#DIV/0!	#DIV/0!	#DIV/0!	#DIV/0!	#DIV/0!
51	CTX	SS	SSp-n6a	889	Primary somatosensory area, nose, layer 6a	#DIV/0!	#DIV/0!	#DIV/0!	#DIV/0!	#DIV/0!	#DIV/0!	#DIV/0!	#DIV/0!	#DIV/0!	#DIV/0!	#DIV/0!	#DIV/0!	#DIV/0!	#DIV/0!	#DIV/0!	#DIV/0!	#DIV/0!	#DIV/0!	#DIV/0!	#DIV/0!	#DIV/0!	#DIV/0!	#DIV/0!	#DIV/0!	#DIV/0!	#DIV/0!	#DIV/0!	#DIV/0!
52	CTX	SS	SSp-n6b	929	Primary somatosensory area, nose, layer 6b	#DIV/0!	#DIV/0!	#DIV/0!	#DIV/0!	#DIV/0!	#DIV/0!	#DIV/0!	#DIV/0!	#DIV/0!	#DIV/0!	#DIV/0!	#DIV/0!	#DIV/0!	#DIV/0!	#DIV/0!	#DIV/0!	#DIV/0!	#DIV/0!	#DIV/0!	#DIV/0!	#DIV/0!	#DIV/0!	#DIV/0!	#DIV/0!	#DIV/0!	#DIV/0!	#DIV/0!	#DIV/0!
53	CTX	SS	SSp-bfd	329	Primary somatosensory area, barrel field	#DIV/0!	#DIV/0!	#DIV/0!	#DIV/0!	#DIV/0!	#DIV/0!	#DIV/0!	#DIV/0!	#DIV/0!	#DIV/0!	#DIV/0!	#DIV/0!	#DIV/0!	#DIV/0!	#DIV/0!	#DIV/0!	#DIV/0!	#DIV/0!	#DIV/0!	#DIV/0!	#DIV/0!	#DIV/0!	#DIV/0!	#DIV/0!	#DIV/0!	#DIV/0!	#DIV/0!	#DIV/0!
54	CTX	SS	SSp-bfd1	981	Primary somatosensory area, barrel field, layer 1	#DIV/0!	#DIV/0!	#DIV/0!	#DIV/0!	#DIV/0!	#DIV/0!	#DIV/0!	#DIV/0!	#DIV/0!	#DIV/0!	#DIV/0!	#DIV/0!	#DIV/0!	#DIV/0!	#DIV/0!	#DIV/0!	#DIV/0!	#DIV/0!	#DIV/0!	#DIV/0!	#DIV/0!	#DIV/0!	#DIV/0!	#DIV/0!	#DIV/0!	#DIV/0!	#DIV/0!	#DIV/0!
55	CTX	SS	SSp-bfd2/3	201	Primary somatosensory area, barrel field, layer 2/3	#DIV/0!	#DIV/0!	#DIV/0!	#DIV/0!	#DIV/0!	#DIV/0!	#DIV/0!	#DIV/0!	#DIV/0!	#DIV/0!	#DIV/0!	#DIV/0!	#DIV/0!	#DIV/0!	#DIV/0!	#DIV/0!	#DIV/0!	#DIV/0!	#DIV/0!	#DIV/0!	#DIV/0!	#DIV/0!	#DIV/0!	#DIV/0!	#DIV/0!	#DIV/0!	#DIV/0!	#DIV/0!
56	CTX	SS	SSp-bfd4	1047	Primary somatosensory area, barrel field, layer 4	#DIV/0!	#DIV/0!	#DIV/0!	#DIV/0!	#DIV/0!	#DIV/0!	#DIV/0!	#DIV/0!	#DIV/0!	#DIV/0!	#DIV/0!	#DIV/0!	#DIV/0!	#DIV/0!	#DIV/0!	#DIV/0!	#DIV/0!	#DIV/0!	#DIV/0!	#DIV/0!	#DIV/0!	#DIV/0!	#DIV/0!	#DIV/0!	#DIV/0!	#DIV/0!	#DIV/0!	#DIV/0!
57	CTX	SS	SSp-bfd5	1070	Primary somatosensory area, barrel field, layer 5	#DIV/0!	#DIV/0!	#DIV/0!	#DIV/0!	#DIV/0!	#DIV/0!	#DIV/0!	#DIV/0!	#DIV/0!	#DIV/0!	#DIV/0!	#DIV/0!	#DIV/0!	#DIV/0!	#DIV/0!	#DIV/0!	#DIV/0!	#DIV/0!	#DIV/0!	#DIV/0!	#DIV/0!	#DIV/0!	#DIV/0!	#DIV/0!	#DIV/0!	#DIV/0!	#DIV/0!	#DIV/0!
58	CTX	SS	SSp-bfd6a	1038	Primary somatosensory area, barrel field, layer 6a	#DIV/0!	#DIV/0!	#DIV/0!	#DIV/0!	#DIV/0!	#DIV/0!	#DIV/0!	#DIV/0!	#DIV/0!	#DIV/0!	#DIV/0!	#DIV/0!	#DIV/0!	#DIV/0!	#DIV/0!	#DIV/0!	#DIV/0!	#DIV/0!	#DIV/0!	#DIV/0!	#DIV/0!	#DIV/0!	#DIV/0!	#DIV/0!	#DIV/0!	#DIV/0!	#DIV/0!	#DIV/0!
59	CTX	SS	SSp-bfd6b	1062	Primary somatosensory area, barrel field, layer 6b	#DIV/0!	#DIV/0!	#DIV/0!	#DIV/0!	#DIV/0!	#DIV/0!	#DIV/0!	#DIV/0!	#DIV/0!	#DIV/0!	#DIV/0!	#DIV/0!	#DIV/0!	#DIV/0!	#DIV/0!	#DIV/0!	#DIV/0!	#DIV/0!	#DIV/0!	#DIV/0!	#DIV/0!	#DIV/0!	#DIV/0!	#DIV/0!	#DIV/0!	#DIV/0!	#DIV/0!	#DIV/0!
60	CTX	SS	VISrll	480149202	Rostrolateral lateral visual area	#DIV/0!	#DIV/0!	#DIV/0!	#DIV/0!	#DIV/0!	#DIV/0!	#DIV/0!	#DIV/0!	#DIV/0!	#DIV/0!	#DIV/0!	#DIV/0!	#DIV/0!	#DIV/0!	#DIV/0!	#DIV/0!	#DIV/0!	#DIV/0!	#DIV/0!	#DIV/0!	#DIV/0!	#DIV/0!	#DIV/0!	#DIV/0!	#DIV/0!	#DIV/0!	#DIV/0!	#DIV/0!
61	CTX	SS	VISrll1	480149206	Rostrolateral lateral visual area, layer 1	#DIV/0!	#DIV/0!	#DIV/0!	#DIV/0!	#DIV/0!	#DIV/0!	#DIV/0!	#DIV/0!	#DIV/0!	#DIV/0!	#DIV/0!	#DIV/0!	#DIV/0!	#DIV/0!	#DIV/0!	#DIV/0!	#DIV/0!	#DIV/0!	#DIV/0!	#DIV/0!	#DIV/0!	#DIV/0!	#DIV/0!	#DIV/0!	#DIV/0!	#DIV/0!	#DIV/0!	#DIV/0!
62	CTX	SS	VISrll2/3	480149210	Rostrolateral lateral visual area, layer 2/3	#DIV/0!	#DIV/0!	#DIV/0!	#DIV/0!	#DIV/0!	#DIV/0!	#DIV/0!	#DIV/0!	#DIV/0!	#DIV/0!	#DIV/0!	#DIV/0!	#DIV/0!	#DIV/0!	#DIV/0!	#DIV/0!	#DIV/0!	#DIV/0!	#DIV/0!	#DIV/0!	#DIV/0!	#DIV/0!	#DIV/0!	#DIV/0!	#DIV/0!	#DIV/0!	#DIV/0!	#DIV/0!
63	CTX	SS	VISrll4	480149214	Rostrolateral lateral visual area, layer 4	#DIV/0!	#DIV/0!	#DIV/0!	#DIV/0!	#DIV/0!	#DIV/0!	#DIV/0!	#DIV/0!	#DIV/0!	#DIV/0!	#DIV/0!	#DIV/0!	#DIV/0!	#DIV/0!	#DIV/0!	#DIV/0!	#DIV/0!	#DIV/0!	#DIV/0!	#DIV/0!	#DIV/0!	#DIV/0!	#DIV/0!	#DIV/0!	#DIV/0!	#DIV/0!	#DIV/0!	#DIV/0!
64	CTX	SS	VISrll5	480149218	Rostrolateral lateral visual area,layer 5	#DIV/0!	#DIV/0!	#DIV/0!	#DIV/0!	#DIV/0!	#DIV/0!	#DIV/0!	#DIV/0!	#DIV/0!	#DIV/0!	#DIV/0!	#DIV/0!	#DIV/0!	#DIV/0!	#DIV/0!	#DIV/0!	#DIV/0!	#DIV/0!	#DIV/0!	#DIV/0!	#DIV/0!	#DIV/0!	#DIV/0!	#DIV/0!	#DIV/0!	#DIV/0!	#DIV/0!	#DIV/0!
65	CTX	SS	VISrll6a	480149222	Rostrolateral lateral visual area, layer 6a	#DIV/0!	#DIV/0!	#DIV/0!	#DIV/0!	#DIV/0!	#DIV/0!	#DIV/0!	#DIV/0!	#DIV/0!	#DIV/0!	#DIV/0!	#DIV/0!	#DIV/0!	#DIV/0!	#DIV/0!	#DIV/0!	#DIV/0!	#DIV/0!	#DIV/0!	#DIV/0!	#DIV/0!	#DIV/0!	#DIV/0!	#DIV/0!	#DIV/0!	#DIV/0!	#DIV/0!	#DIV/0!
66	CTX	SS	VISrll6b	480149226	Rostrolateral lateral visual area, layer 6b	#DIV/0!	#DIV/0!	#DIV/0!	#DIV/0!	#DIV/0!	#DIV/0!	#DIV/0!	#DIV/0!	#DIV/0!	#DIV/0!	#DIV/0!	#DIV/0!	#DIV/0!	#DIV/0!	#DIV/0!	#DIV/0!	#DIV/0!	#DIV/0!	#DIV/0!	#DIV/0!	#DIV/0!	#DIV/0!	#DIV/0!	#DIV/0!	#DIV/0!	#DIV/0!	#DIV/0!	#DIV/0!
67	CTX	SS	SSp-ll	337	Primary somatosensory area, lower limb	#DIV/0!	#DIV/0!	#DIV/0!	#DIV/0!	#DIV/0!	#DIV/0!	#DIV/0!	#DIV/0!	#DIV/0!	#DIV/0!	#DIV/0!	#DIV/0!	#DIV/0!	#DIV/0!	#DIV/0!	#DIV/0!	#DIV/0!	#DIV/0!	#DIV/0!	#DIV/0!	#DIV/0!	#DIV/0!	#DIV/0!	#DIV/0!	#DIV/0!	#DIV/0!	#DIV/0!	#DIV/0!
68	CTX	SS	SSp-ll1	1030	Primary somatosensory area, lower limb, layer 1	#DIV/0!	#DIV/0!	#DIV/0!	#DIV/0!	0.0178346	#DIV/0!	0.0199796	#DIV/0!	0.0244328	#DIV/0!	0.04334	0.00873683	#DIV/0!	#DIV/0!	#DIV/0!	#DIV/0!	#DIV/0!	0.0137117	#DIV/0!	#DIV/0!	0.00307967	0.00145964	#DIV/0!	0.0136312	0.0242199	#DIV/0!	#DIV/0!	#DIV/0!
69	CTX	SS	SSp-ll2/3	113	Primary somatosensory area, lower limb, layer 2/3	0.0354663	#DIV/0!	#DIV/0!	#DIV/0!	0.0772031	#DIV/0!	0.0969971	#DIV/0!	0.344823	#DIV/0!	0.126364	0.118248	#DIV/0!	#DIV/0!	#DIV/0!	#DIV/0!	#DIV/0!	0.0170917	#DIV/0!	#DIV/0!	0.0178371	0.0228013	#DIV/0!	0.0165426	0.0344272	#DIV/0!	#DIV/0!	#DIV/0!
70	CTX	SS	SSp-ll4	1094	Primary somatosensory area, lower limb, layer 4	0.0177788	#DIV/0!	#DIV/0!	#DIV/0!	0.110305	#DIV/0!	0.107463	#DIV/0!	0.0419179	#DIV/0!	0.16649	0.140463	#DIV/0!	#DIV/0!	#DIV/0!	#DIV/0!	#DIV/0!	0.00686606	#DIV/0!	#DIV/0!	0.0122849	0.016639	#DIV/0!	0.0230927	0.0497904	#DIV/0!	#DIV/0!	#DIV/0!
71	CTX	SS	SSp-ll5	1128	Primary somatosensory area, lower limb, layer 5	0.0310032	#DIV/0!	#DIV/0!	#DIV/0!	0.0905396	#DIV/0!	0.0969158	#DIV/0!	0.116178	#DIV/0!	0.118273	0.0944652	#DIV/0!	#DIV/0!	#DIV/0!	#DIV/0!	#DIV/0!	0.0227008	#DIV/0!	#DIV/0!	0.0344926	0.0473189	#DIV/0!	0.0369105	0.0436416	#DIV/0!	#DIV/0!	#DIV/0!
72	CTX	SS	SSp-ll6a	478	Primary somatosensory area, lower limb, layer 6a	0.0327981	#DIV/0!	0.050707	0.0614904	0.0803055	#DIV/0!	0.0982056	0.0647573	1.3345	#DIV/0!	0.113531	0.0844919	#DIV/0!	#DIV/0!	0.000672769	#DIV/0!	#DIV/0!	0.0272943	#DIV/0!	#DIV/0!	0.0447098	0.0461841	#DIV/0!	0.0401066	0.0564501	#DIV/0!	#DIV/0!	#DIV/0!
73	CTX	SS	SSp-ll6b	510	Primary somatosensory area, lower limb, layer 6b	0.0272999	#DIV/0!	0.0240684	0.0880505	0.0633403	#DIV/0!	0.065271	0.0135137	#DIV/0!	#DIV/0!	0.0803866	0.109989	#DIV/0!	#DIV/0!	0.00116996	#DIV/0!	#DIV/0!	0.00311403	0.00548938	#DIV/0!	0.024329	0.0402329	#DIV/0!	0.0376104	0.0534164	#DIV/0!	#DIV/0!	#DIV/0!
74	CTX	SS	SSp-m	345	Primary somatosensory area, mouth	#DIV/0!	#DIV/0!	#DIV/0!	#DIV/0!	#DIV/0!	#DIV/0!	#DIV/0!	#DIV/0!	#DIV/0!	#DIV/0!	#DIV/0!	#DIV/0!	#DIV/0!	#DIV/0!	#DIV/0!	#DIV/0!	#DIV/0!	#DIV/0!	#DIV/0!	#DIV/0!	#DIV/0!	#DIV/0!	#DIV/0!	#DIV/0!	#DIV/0!	#DIV/0!	#DIV/0!	#DIV/0!
75	CTX	SS	SSp-m1	878	Primary somatosensory area, mouth, layer 1	#DIV/0!	#DIV/0!	#DIV/0!	#DIV/0!	#DIV/0!	#DIV/0!	#DIV/0!	#DIV/0!	#DIV/0!	#DIV/0!	#DIV/0!	#DIV/0!	#DIV/0!	#DIV/0!	#DIV/0!	#DIV/0!	#DIV/0!	#DIV/0!	#DIV/0!	#DIV/0!	#DIV/0!	#DIV/0!	#DIV/0!	#DIV/0!	#DIV/0!	#DIV/0!	#DIV/0!	#DIV/0!
76	CTX	SS	SSp-m2/3	657	Primary somatosensory area, mouth, layer 2/3	#DIV/0!	#DIV/0!	#DIV/0!	#DIV/0!	#DIV/0!	#DIV/0!	#DIV/0!	#DIV/0!	#DIV/0!	#DIV/0!	#DIV/0!	#DIV/0!	#DIV/0!	#DIV/0!	#DIV/0!	#DIV/0!	#DIV/0!	#DIV/0!	#DIV/0!	#DIV/0!	#DIV/0!	#DIV/0!	#DIV/0!	#DIV/0!	#DIV/0!	#DIV/0!	#DIV/0!	#DIV/0!
77	CTX	SS	SSp-m4	950	Primary somatosensory area, mouth, layer 4	#DIV/0!	#DIV/0!	#DIV/0!	#DIV/0!	#DIV/0!	#DIV/0!	#DIV/0!	#DIV/0!	#DIV/0!	#DIV/0!	#DIV/0!	#DIV/0!	#DIV/0!	#DIV/0!	#DIV/0!	#DIV/0!	#DIV/0!	#DIV/0!	#DIV/0!	#DIV/0!	#DIV/0!	#DIV/0!	#DIV/0!	#DIV/0!	#DIV/0!	#DIV/0!	#DIV/0!	#DIV/0!
78	CTX	SS	SSp-m5	974	Primary somatosensory area, mouth, layer 5	#DIV/0!	#DIV/0!	#DIV/0!	#DIV/0!	#DIV/0!	#DIV/0!	#DIV/0!	#DIV/0!	#DIV/0!	#DIV/0!	#DIV/0!	#DIV/0!	#DIV/0!	#DIV/0!	#DIV/0!	#DIV/0!	#DIV/0!	#DIV/0!	#DIV/0!	#DIV/0!	#DIV/0!	#DIV/0!	#DIV/0!	#DIV/0!	#DIV/0!	#DIV/0!	#DIV/0!	#DIV/0!
79	CTX	SS	SSp-m6a	1102	Primary somatosensory area, mouth, layer 6a	#DIV/0!	#DIV/0!	#DIV/0!	#DIV/0!	#DIV/0!	#DIV/0!	#DIV/0!	#DIV/0!	#DIV/0!	#DIV/0!	#DIV/0!	#DIV/0!	#DIV/0!	#DIV/0!	#DIV/0!	#DIV/0!	#DIV/0!	#DIV/0!	#DIV/0!	#DIV/0!	#DIV/0!	#DIV/0!	#DIV/0!	#DIV/0!	#DIV/0!	#DIV/0!	#DIV/0!	#DIV/0!
80	CTX	SS	SSp-m6b	2	Primary somatosensory area, mouth, layer 6b	#DIV/0!	#DIV/0!	#DIV/0!	#DIV/0!	#DIV/0!	#DIV/0!	#DIV/0!	#DIV/0!	#DIV/0!	#DIV/0!	#DIV/0!	#DIV/0!	#DIV/0!	#DIV/0!	#DIV/0!	#DIV/0!	#DIV/0!	#DIV/0!	#DIV/0!	#DIV/0!	#DIV/0!	#DIV/0!	#DIV/0!	#DIV/0!	#DIV/0!	#DIV/0!	#DIV/0!	#DIV/0!
81	CTX	SS	SSp-ul	369	Primary somatosensory area, upper limb	#DIV/0!	#DIV/0!	#DIV/0!	#DIV/0!	#DIV/0!	#DIV/0!	#DIV/0!	#DIV/0!	#DIV/0!	#DIV/0!	#DIV/0!	#DIV/0!	#DIV/0!	#DIV/0!	#DIV/0!	#DIV/0!	#DIV/0!	#DIV/0!	#DIV/0!	#DIV/0!	#DIV/0!	#DIV/0!	#DIV/0!	#DIV/0!	#DIV/0!	#DIV/0!	#DIV/0!	#DIV/0!
82	CTX	SS	SSp-ul1	450	Primary somatosensory area, upper limb, layer 1	#DIV/0!	#DIV/0!	#DIV/0!	#DIV/0!	#DIV/0!	#DIV/0!	#DIV/0!	#DIV/0!	#DIV/0!	#DIV/0!	#DIV/0!	#DIV/0!	#DIV/0!	#DIV/0!	#DIV/0!	#DIV/0!	#DIV/0!	#DIV/0!	#DIV/0!	#DIV/0!	#DIV/0!	#DIV/0!	#DIV/0!	#DIV/0!	#DIV/0!	#DIV/0!	#DIV/0!	#DIV/0!
83	CTX	SS	SSp-ul2/3	854	Primary somatosensory area, upper limb, layer 2/3	#DIV/0!	#DIV/0!	#DIV/0!	#DIV/0!	#DIV/0!	#DIV/0!	#DIV/0!	#DIV/0!	#DIV/0!	#DIV/0!	#DIV/0!	#DIV/0!	#DIV/0!	#DIV/0!	#DIV/0!	#DIV/0!	#DIV/0!	#DIV/0!	#DIV/0!	#DIV/0!	#DIV/0!	#DIV/0!	#DIV/0!	#DIV/0!	#DIV/0!	#DIV/0!	#DIV/0!	#DIV/0!
84	CTX	SS	SSp-ul4	577	Primary somatosensory area, upper limb, layer 4	#DIV/0!	#DIV/0!	#DIV/0!	#DIV/0!	#DIV/0!	#DIV/0!	#DIV/0!	#DIV/0!	#DIV/0!	#DIV/0!	#DIV/0!	#DIV/0!	#DIV/0!	#DIV/0!	#DIV/0!	#DIV/0!	#DIV/0!	#DIV/0!	#DIV/0!	#DIV/0!	#DIV/0!	#DIV/0!	#DIV/0!	#DIV/0!	#DIV/0!	#DIV/0!	#DIV/0!	#DIV/0!
85	CTX	SS	SSp-ul5	625	Primary somatosensory area, upper limb, layer 5	#DIV/0!	#DIV/0!	#DIV/0!	#DIV/0!	#DIV/0!	#DIV/0!	#DIV/0!	#DIV/0!	#DIV/0!	#DIV/0!	#DIV/0!	#DIV/0!	#DIV/0!	#DIV/0!	#DIV/0!	#DIV/0!	#DIV/0!	#DIV/0!	#DIV/0!	#DIV/0!	#DIV/0!	#DIV/0!	#DIV/0!	#DIV/0!	#DIV/0!	#DIV/0!	#DIV/0!	#DIV/0!
86	CTX	SS	SSp-ul6a	945	Primary somatosensory area, upper limb, layer 6a	#DIV/0!	#DIV/0!	#DIV/0!	#DIV/0!	#DIV/0!	#DIV/0!	#DIV/0!	#DIV/0!	#DIV/0!	#DIV/0!	#DIV/0!	#DIV/0!	#DIV/0!	#DIV/0!	#DIV/0!	#DIV/0!	#DIV/0!	#DIV/0!	#DIV/0!	#DIV/0!	#DIV/0!	#DIV/0!	#DIV/0!	#DIV/0!	#DIV/0!	#DIV/0!	#DIV/0!	#DIV/0!
87	CTX	SS	SSp-ul6b	1026	Primary somatosensory area, upper limb, layer 6b	#DIV/0!	#DIV/0!	#DIV/0!	#DIV/0!	#DIV/0!	#DIV/0!	#DIV/0!	#DIV/0!	#DIV/0!	#DIV/0!	#DIV/0!	#DIV/0!	#DIV/0!	#DIV/0!	#DIV/0!	#DIV/0!	#DIV/0!	#DIV/0!	#DIV/0!	#DIV/0!	#DIV/0!	#DIV/0!	#DIV/0!	#DIV/0!	#DIV/0!	#DIV/0!	#DIV/0!	#DIV/0!
88	CTX	SS	SSp-tr	361	Primary somatosensory area, trunk	#DIV/0!	#DIV/0!	#DIV/0!	#DIV/0!	#DIV/0!	#DIV/0!	#DIV/0!	#DIV/0!	#DIV/0!	#DIV/0!	#DIV/0!	#DIV/0!	#DIV/0!	#DIV/0!	#DIV/0!	#DIV/0!	#DIV/0!	#DIV/0!	#DIV/0!	#DIV/0!	#DIV/0!	#DIV/0!	#DIV/0!	#DIV/0!	#DIV/0!	#DIV/0!	#DIV/0!	#DIV/0!
89	CTX	SS	SSp-tr1	1006	Primary somatosensory area, trunk, layer 1	0.00818607	#DIV/0!	0.0154765	0.0103248	0.0266001	#DIV/0!	0.022974	0.0109159	0.0311224	#DIV/0!	0.0482093	0.0386516	#DIV/0!	#DIV/0!	0.0011443	#DIV/0!	#DIV/0!	0.000855371	0.00642956	#DIV/0!	0.00875102	0.00444096	#DIV/0!	0.0094764	0.0161865	#DIV/0!	#DIV/0!	#DIV/0!
90	CTX	SS	SSp-tr2/3	670	Primary somatosensory area, trunk, layer 2/3	0.0227445	#DIV/0!	0.0349287	0.0483536	0.0841622	#DIV/0!	0.0867597	0.0702839	0.493047	#DIV/0!	0.114591	0.136117	#DIV/0!	#DIV/0!	#DIV/0!	#DIV/0!	#DIV/0!	0.010499	0.0135475	#DIV/0!	0.0219529	0.0235401	#DIV/0!	0.0175171	0.0485692	#DIV/0!	#DIV/0!	#DIV/0!
91	CTX	SS	SSp-tr4	1086	Primary somatosensory area, trunk, layer 4	0.0440961	#DIV/0!	0.0534119	0.0638783	0.123337	#DIV/0!	0.130667	0.104718	0.0454326	#DIV/0!	0.16376	0.144815	#DIV/0!	#DIV/0!	#DIV/0!	#DIV/0!	#DIV/0!	0.0159937	#DIV/0!	#DIV/0!	0.0121129	0.0247664	#DIV/0!	0.0245383	0.0574216	#DIV/0!	#DIV/0!	#DIV/0!
92	CTX	SS	SSp-tr5	1111	Primary somatosensory area, trunk, layer 5	0.0309984	#DIV/0!	0.0564742	0.058805	0.0971133	#DIV/0!	0.0942915	0.0645719	0.215966	#DIV/0!	0.121009	0.115205	#DIV/0!	#DIV/0!	0.00112413	#DIV/0!	#DIV/0!	0.0303849	0.0138168	#DIV/0!	0.0334953	0.048409	#DIV/0!	0.0358257	0.0543486	#DIV/0!	#DIV/0!	#DIV/0!
93	CTX	SS	SSp-tr6a	9	Primary somatosensory area, trunk, layer 6a	0.0380799	#DIV/0!	0.059433	0.0700075	0.103618	#DIV/0!	0.1061	0.0542027	0.752404	#DIV/0!	0.107758	0.102378	#DIV/0!	#DIV/0!	0.00164591	#DIV/0!	#DIV/0!	0.0376252	0.0338594	#DIV/0!	0.04791	0.043639	#DIV/0!	0.0432373	0.0625081	#DIV/0!	#DIV/0!	#DIV/0!
94	CTX	SS	SSp-tr6b	461	Primary somatosensory area, trunk, layer 6b	0.0334123	#DIV/0!	0.0343858	0.0746216	0.0862749	#DIV/0!	0.0468057	0.0216142	#DIV/0!	#DIV/0!	0.0867167	0.060479	#DIV/0!	#DIV/0!	0.00023629	#DIV/0!	#DIV/0!	0.0208884	0.0365547	#DIV/0!	0.0381887	0.0236516	#DIV/0!	0.0506673	0.0607268	0.0300206	#DIV/0!	#DIV/0!
95	CTX	SS	SSp-un	182305689	Primary somatosensory area, unassigned	#DIV/0!	#DIV/0!	#DIV/0!	#DIV/0!	#DIV/0!	#DIV/0!	#DIV/0!	#DIV/0!	#DIV/0!	#DIV/0!	#DIV/0!	#DIV/0!	#DIV/0!	#DIV/0!	#DIV/0!	#DIV/0!	#DIV/0!	#DIV/0!	#DIV/0!	#DIV/0!	#DIV/0!	#DIV/0!	#DIV/0!	#DIV/0!	#DIV/0!	#DIV/0!	#DIV/0!	#DIV/0!
96	CTX	SS	SSp-un1	182305693	Primary somatosensory area, unassigned, layer 1	#DIV/0!	#DIV/0!	#DIV/0!	#DIV/0!	#DIV/0!	#DIV/0!	#DIV/0!	#DIV/0!	#DIV/0!	#DIV/0!	#DIV/0!	#DIV/0!	#DIV/0!	#DIV/0!	#DIV/0!	#DIV/0!	#DIV/0!	#DIV/0!	#DIV/0!	#DIV/0!	#DIV/0!	#DIV/0!	#DIV/0!	#DIV/0!	#DIV/0!	#DIV/0!	#DIV/0!	#DIV/0!
97	CTX	SS	SSp-un2/3	182305697	Primary somatosensory area, unassigned, layer 2/3	#DIV/0!	#DIV/0!	#DIV/0!	#DIV/0!	#DIV/0!	#DIV/0!	#DIV/0!	#DIV/0!	#DIV/0!	#DIV/0!	#DIV/0!	#DIV/0!	#DIV/0!	#DIV/0!	#DIV/0!	#DIV/0!	#DIV/0!	#DIV/0!	#DIV/0!	#DIV/0!	#DIV/0!	#DIV/0!	#DIV/0!	#DIV/0!	#DIV/0!	#DIV/0!	#DIV/0!	#DIV/0!
98	CTX	SS	SSp-un4	182305701	Primary somatosensory area, unassigned, layer 4	#DIV/0!	#DIV/0!	#DIV/0!	#DIV/0!	#DIV/0!	#DIV/0!	#DIV/0!	#DIV/0!	#DIV/0!	#DIV/0!	#DIV/0!	#DIV/0!	#DIV/0!	#DIV/0!	#DIV/0!	#DIV/0!	#DIV/0!	#DIV/0!	#DIV/0!	#DIV/0!	#DIV/0!	#DIV/0!	#DIV/0!	#DIV/0!	#DIV/0!	#DIV/0!	#DIV/0!	#DIV/0!
99	CTX	SS	SSp-un5	182305705	Primary somatosensory area, unassigned, layer 5	#DIV/0!	#DIV/0!	#DIV/0!	#DIV/0!	#DIV/0!	#DIV/0!	#DIV/0!	#DIV/0!	#DIV/0!	#DIV/0!	#DIV/0!	#DIV/0!	#DIV/0!	#DIV/0!	#DIV/0!	#DIV/0!	#DIV/0!	#DIV/0!	#DIV/0!	#DIV/0!	#DIV/0!	#DIV/0!	#DIV/0!	#DIV/0!	#DIV/0!	#DIV/0!	#DIV/0!	#DIV/0!
100	CTX	SS	SSp-un6a	182305709	Primary somatosensory area, unassigned, layer 6a	#DIV/0!	#DIV/0!	#DIV/0!	#DIV/0!	#DIV/0!	#DIV/0!	#DIV/0!	#DIV/0!	#DIV/0!	#DIV/0!	#DIV/0!	#DIV/0!	#DIV/0!	#DIV/0!	#DIV/0!	#DIV/0!	#DIV/0!	#DIV/0!	#DIV/0!	#DIV/0!	#DIV/0!	#DIV/0!	#DIV/0!	#DIV/0!	#DIV/0!	#DIV/0!	#DIV/0!	#DIV/0!
101	CTX	SS	SSp-un6b	182305713	Primary somatosensory area, unassigned, layer 6b	#DIV/0!	#DIV/0!	#DIV/0!	#DIV/0!	#DIV/0!	#DIV/0!	#DIV/0!	#DIV/0!	#DIV/0!	#DIV/0!	#DIV/0!	#DIV/0!	#DIV/0!	#DIV/0!	#DIV/0!	#DIV/0!	#DIV/0!	#DIV/0!	#DIV/0!	#DIV/0!	#DIV/0!	#DIV/0!	#DIV/0!	#DIV/0!	#DIV/0!	#DIV/0!	#DIV/0!	#DIV/0!
102	CTX	SS	SSs	378	Supplemental somatosensory area	#DIV/0!	#DIV/0!	#DIV/0!	#DIV/0!	#DIV/0!	#DIV/0!	#DIV/0!	#DIV/0!	#DIV/0!	#DIV/0!	#DIV/0!	#DIV/0!	#DIV/0!	#DIV/0!	#DIV/0!	#DIV/0!	#DIV/0!	#DIV/0!	#DIV/0!	#DIV/0!	#DIV/0!	#DIV/0!	#DIV/0!	#DIV/0!	#DIV/0!	#DIV/0!	#DIV/0!	#DIV/0!
103	CTX	SS	SSs1	873	Supplemental somatosensory area, layer 1	#DIV/0!	#DIV/0!	#DIV/0!	#DIV/0!	#DIV/0!	#DIV/0!	#DIV/0!	#DIV/0!	#DIV/0!	#DIV/0!	#DIV/0!	#DIV/0!	#DIV/0!	#DIV/0!	#DIV/0!	#DIV/0!	#DIV/0!	#DIV/0!	#DIV/0!	#DIV/0!	#DIV/0!	#DIV/0!	#DIV/0!	#DIV/0!	#DIV/0!	#DIV/0!	#DIV/0!	#DIV/0!
104	CTX	SS	SSs2/3	806	Supplemental somatosensory area, layer 2/3	#DIV/0!	#DIV/0!	#DIV/0!	#DIV/0!	#DIV/0!	#DIV/0!	#DIV/0!	#DIV/0!	#DIV/0!	#DIV/0!	#DIV/0!	#DIV/0!	#DIV/0!	#DIV/0!	#DIV/0!	#DIV/0!	#DIV/0!	#DIV/0!	#DIV/0!	#DIV/0!	#DIV/0!	#DIV/0!	#DIV/0!	#DIV/0!	#DIV/0!	#DIV/0!	#DIV/0!	#DIV/0!
105	CTX	SS	SSs4	1035	Supplemental somatosensory area, layer 4	#DIV/0!	#DIV/0!	#DIV/0!	#DIV/0!	#DIV/0!	#DIV/0!	#DIV/0!	#DIV/0!	#DIV/0!	#DIV/0!	#DIV/0!	#DIV/0!	#DIV/0!	#DIV/0!	#DIV/0!	#DIV/0!	#DIV/0!	#DIV/0!	#DIV/0!	#DIV/0!	#DIV/0!	#DIV/0!	#DIV/0!	#DIV/0!	#DIV/0!	#DIV/0!	#DIV/0!	#DIV/0!
106	CTX	SS	SSs5	1090	Supplemental somatosensory area, layer 5	#DIV/0!	#DIV/0!	#DIV/0!	#DIV/0!	#DIV/0!	#DIV/0!	#DIV/0!	#DIV/0!	#DIV/0!	#DIV/0!	#DIV/0!	#DIV/0!	#DIV/0!	#DIV/0!	#DIV/0!	#DIV/0!	#DIV/0!	#DIV/0!	#DIV/0!	#DIV/0!	#DIV/0!	#DIV/0!	#DIV/0!	#DIV/0!	#DIV/0!	#DIV/0!	#DIV/0!	#DIV/0!
107	CTX	SS	SSs6a	862	Supplemental somatosensory area, layer 6a	#DIV/0!	#DIV/0!	#DIV/0!	#DIV/0!	#DIV/0!	#DIV/0!	#DIV/0!	#DIV/0!	#DIV/0!	#DIV/0!	#DIV/0!	#DIV/0!	#DIV/0!	#DIV/0!	#DIV/0!	#DIV/0!	#DIV/0!	#DIV/0!	#DIV/0!	#DIV/0!	#DIV/0!	#DIV/0!	#DIV/0!	#DIV/0!	#DIV/0!	#DIV/0!	#DIV/0!	#DIV/0!
108	CTX	SS	SSs6b	893	Supplemental somatosensory area, layer 6b	#DIV/0!	#DIV/0!	#DIV/0!	#DIV/0!	#DIV/0!	#DIV/0!	#DIV/0!	#DIV/0!	#DIV/0!	#DIV/0!	#DIV/0!	#DIV/0!	#DIV/0!	#DIV/0!	#DIV/0!	#DIV/0!	#DIV/0!	#DIV/0!	#DIV/0!	#DIV/0!	#DIV/0!	#DIV/0!	#DIV/0!	#DIV/0!	#DIV/0!	#DIV/0!	#DIV/0!	#DIV/0!
109	CTX	GU	GU	1057	Gustatory areas	#DIV/0!	#DIV/0!	#DIV/0!	#DIV/0!	#DIV/0!	#DIV/0!	#DIV/0!	#DIV/0!	#DIV/0!	#DIV/0!	#DIV/0!	#DIV/0!	#DIV/0!	#DIV/0!	#DIV/0!	#DIV/0!	#DIV/0!	#DIV/0!	#DIV/0!	#DIV/0!	#DIV/0!	#DIV/0!	#DIV/0!	#DIV/0!	#DIV/0!	#DIV/0!	#DIV/0!	#DIV/0!
110	CTX	GU	GU1	36	Gustatory areas, layer 1	#DIV/0!	#DIV/0!	#DIV/0!	#DIV/0!	#DIV/0!	#DIV/0!	#DIV/0!	#DIV/0!	#DIV/0!	#DIV/0!	#DIV/0!	#DIV/0!	#DIV/0!	#DIV/0!	#DIV/0!	#DIV/0!	#DIV/0!	#DIV/0!	#DIV/0!	#DIV/0!	#DIV/0!	#DIV/0!	#DIV/0!	#DIV/0!	#DIV/0!	#DIV/0!	#DIV/0!	#DIV/0!
111	CTX	GU	GU2/3	180	Gustatory areas, layer 2/3	#DIV/0!	#DIV/0!	#DIV/0!	#DIV/0!	#DIV/0!	#DIV/0!	#DIV/0!	#DIV/0!	#DIV/0!	#DIV/0!	#DIV/0!	#DIV/0!	#DIV/0!	#DIV/0!	#DIV/0!	#DIV/0!	#DIV/0!	#DIV/0!	#DIV/0!	#DIV/0!	#DIV/0!	#DIV/0!	#DIV/0!	#DIV/0!	#DIV/0!	#DIV/0!	#DIV/0!	#DIV/0!
112	CTX	GU	GU4	148	Gustatory areas, layer 4	#DIV/0!	#DIV/0!	#DIV/0!	#DIV/0!	#DIV/0!	#DIV/0!	#DIV/0!	#DIV/0!	#DIV/0!	#DIV/0!	#DIV/0!	#DIV/0!	#DIV/0!	#DIV/0!	#DIV/0!	#DIV/0!	#DIV/0!	#DIV/0!	#DIV/0!	#DIV/0!	#DIV/0!	#DIV/0!	#DIV/0!	#DIV/0!	#DIV/0!	#DIV/0!	#DIV/0!	#DIV/0!
113	CTX	GU	GU5	187	Gustatory areas, layer 5	#DIV/0!	#DIV/0!	#DIV/0!	#DIV/0!	#DIV/0!	#DIV/0!	#DIV/0!	#DIV/0!	#DIV/0!	#DIV/0!	#DIV/0!	#DIV/0!	#DIV/0!	#DIV/0!	#DIV/0!	#DIV/0!	#DIV/0!	#DIV/0!	#DIV/0!	#DIV/0!	#DIV/0!	#DIV/0!	#DIV/0!	#DIV/0!	#DIV/0!	#DIV/0!	#DIV/0!	#DIV/0!
114	CTX	GU	GU6a	638	Gustatory areas, layer 6a	#DIV/0!	#DIV/0!	#DIV/0!	#DIV/0!	#DIV/0!	#DIV/0!	#DIV/0!	#DIV/0!	#DIV/0!	#DIV/0!	#DIV/0!	#DIV/0!	#DIV/0!	#DIV/0!	#DIV/0!	#DIV/0!	#DIV/0!	#DIV/0!	#DIV/0!	#DIV/0!	#DIV/0!	#DIV/0!	#DIV/0!	#DIV/0!	#DIV/0!	#DIV/0!	#DIV/0!	#DIV/0!
115	CTX	GU	GU6b	662	Gustatory areas, layer 6b	#DIV/0!	#DIV/0!	#DIV/0!	#DIV/0!	#DIV/0!	#DIV/0!	#DIV/0!	#DIV/0!	#DIV/0!	#DIV/0!	#DIV/0!	#DIV/0!	#DIV/0!	#DIV/0!	#DIV/0!	#DIV/0!	#DIV/0!	#DIV/0!	#DIV/0!	#DIV/0!	#DIV/0!	#DIV/0!	#DIV/0!	#DIV/0!	#DIV/0!	#DIV/0!	#DIV/0!	#DIV/0!
116	CTX	VISC	VISC	677	Visceral area	#DIV/0!	#DIV/0!	#DIV/0!	#DIV/0!	#DIV/0!	#DIV/0!	#DIV/0!	#DIV/0!	#DIV/0!	#DIV/0!	#DIV/0!	#DIV/0!	#DIV/0!	#DIV/0!	#DIV/0!	#DIV/0!	#DIV/0!	#DIV/0!	#DIV/0!	#DIV/0!	#DIV/0!	#DIV/0!	#DIV/0!	#DIV/0!	#DIV/0!	#DIV/0!	#DIV/0!	#DIV/0!
117	CTX	VISC	VISC1	897	Visceral area, layer 1	#DIV/0!	#DIV/0!	#DIV/0!	#DIV/0!	#DIV/0!	#DIV/0!	#DIV/0!	#DIV/0!	#DIV/0!	#DIV/0!	#DIV/0!	#DIV/0!	#DIV/0!	#DIV/0!	#DIV/0!	#DIV/0!	#DIV/0!	#DIV/0!	#DIV/0!	#DIV/0!	#DIV/0!	#DIV/0!	#DIV/0!	#DIV/0!	#DIV/0!	#DIV/0!	#DIV/0!	#DIV/0!
118	CTX	VISC	VISC2/3	1106	Visceral area, layer 2/3	#DIV/0!	#DIV/0!	#DIV/0!	#DIV/0!	#DIV/0!	#DIV/0!	#DIV/0!	#DIV/0!	#DIV/0!	#DIV/0!	#DIV/0!	#DIV/0!	#DIV/0!	#DIV/0!	#DIV/0!	#DIV/0!	#DIV/0!	#DIV/0!	#DIV/0!	#DIV/0!	#DIV/0!	#DIV/0!	#DIV/0!	#DIV/0!	#DIV/0!	#DIV/0!	#DIV/0!	#DIV/0!
119	CTX	VISC	VISC4	1010	Visceral area, layer 4	#DIV/0!	#DIV/0!	#DIV/0!	#DIV/0!	#DIV/0!	#DIV/0!	#DIV/0!	#DIV/0!	#DIV/0!	#DIV/0!	#DIV/0!	#DIV/0!	#DIV/0!	#DIV/0!	#DIV/0!	#DIV/0!	#DIV/0!	#DIV/0!	#DIV/0!	#DIV/0!	#DIV/0!	#DIV/0!	#DIV/0!	#DIV/0!	#DIV/0!	#DIV/0!	#DIV/0!	#DIV/0!
120	CTX	VISC	VISC5	1058	Visceral area, layer 5	#DIV/0!	#DIV/0!	#DIV/0!	#DIV/0!	#DIV/0!	#DIV/0!	#DIV/0!	#DIV/0!	#DIV/0!	#DIV/0!	#DIV/0!	#DIV/0!	#DIV/0!	#DIV/0!	#DIV/0!	#DIV/0!	#DIV/0!	#DIV/0!	#DIV/0!	#DIV/0!	#DIV/0!	#DIV/0!	#DIV/0!	#DIV/0!	#DIV/0!	#DIV/0!	#DIV/0!	#DIV/0!
121	CTX	VISC	VISC6a	857	Visceral area, layer 6a	#DIV/0!	#DIV/0!	#DIV/0!	#DIV/0!	#DIV/0!	#DIV/0!	#DIV/0!	#DIV/0!	#DIV/0!	#DIV/0!	#DIV/0!	#DIV/0!	#DIV/0!	#DIV/0!	#DIV/0!	#DIV/0!	#DIV/0!	#DIV/0!	#DIV/0!	#DIV/0!	#DIV/0!	#DIV/0!	#DIV/0!	#DIV/0!	#DIV/0!	#DIV/0!	#DIV/0!	#DIV/0!
122	CTX	VISC	VISC6b	849	Visceral area, layer 6b	#DIV/0!	#DIV/0!	#DIV/0!	#DIV/0!	#DIV/0!	#DIV/0!	#DIV/0!	#DIV/0!	#DIV/0!	#DIV/0!	#DIV/0!	#DIV/0!	#DIV/0!	#DIV/0!	#DIV/0!	#DIV/0!	#DIV/0!	#DIV/0!	#DIV/0!	#DIV/0!	#DIV/0!	#DIV/0!	#DIV/0!	#DIV/0!	#DIV/0!	#DIV/0!	#DIV/0!	#DIV/0!
123	CTX	AUD	AUD	247	Auditory areas	#DIV/0!	#DIV/0!	#DIV/0!	#DIV/0!	#DIV/0!	#DIV/0!	#DIV/0!	#DIV/0!	#DIV/0!	#DIV/0!	#DIV/0!	#DIV/0!	#DIV/0!	#DIV/0!	#DIV/0!	#DIV/0!	#DIV/0!	#DIV/0!	#DIV/0!	#DIV/0!	#DIV/0!	#DIV/0!	#DIV/0!	#DIV/0!	#DIV/0!	#DIV/0!	#DIV/0!	#DIV/0!
124	CTX	AUD	AUDd	1011	Dorsal auditory area	#DIV/0!	#DIV/0!	#DIV/0!	#DIV/0!	#DIV/0!	#DIV/0!	#DIV/0!	#DIV/0!	#DIV/0!	#DIV/0!	#DIV/0!	#DIV/0!	#DIV/0!	#DIV/0!	#DIV/0!	#DIV/0!	#DIV/0!	#DIV/0!	#DIV/0!	#DIV/0!	#DIV/0!	#DIV/0!	#DIV/0!	#DIV/0!	#DIV/0!	#DIV/0!	#DIV/0!	#DIV/0!
125	CTX	AUD	AUDd1	527	Dorsal auditory area, layer 1	#DIV/0!	#DIV/0!	#DIV/0!	#DIV/0!	#DIV/0!	#DIV/0!	#DIV/0!	#DIV/0!	#DIV/0!	#DIV/0!	#DIV/0!	#DIV/0!	#DIV/0!	#DIV/0!	#DIV/0!	#DIV/0!	#DIV/0!	#DIV/0!	#DIV/0!	#DIV/0!	#DIV/0!	#DIV/0!	#DIV/0!	#DIV/0!	#DIV/0!	#DIV/0!	#DIV/0!	#DIV/0!
126	CTX	AUD	AUDd2/3	600	Dorsal auditory area, layer 2/3	#DIV/0!	#DIV/0!	#DIV/0!	#DIV/0!	#DIV/0!	#DIV/0!	#DIV/0!	#DIV/0!	#DIV/0!	#DIV/0!	#DIV/0!	#DIV/0!	#DIV/0!	#DIV/0!	#DIV/0!	#DIV/0!	#DIV/0!	#DIV/0!	#DIV/0!	#DIV/0!	#DIV/0!	#DIV/0!	#DIV/0!	#DIV/0!	#DIV/0!	#DIV/0!	#DIV/0!	#DIV/0!
127	CTX	AUD	AUDd4	678	Dorsal auditory area, layer 4	#DIV/0!	#DIV/0!	#DIV/0!	#DIV/0!	#DIV/0!	#DIV/0!	#DIV/0!	#DIV/0!	#DIV/0!	#DIV/0!	#DIV/0!	#DIV/0!	#DIV/0!	#DIV/0!	#DIV/0!	#DIV/0!	#DIV/0!	#DIV/0!	#DIV/0!	#DIV/0!	#DIV/0!	#DIV/0!	#DIV/0!	#DIV/0!	#DIV/0!	#DIV/0!	#DIV/0!	#DIV/0!
128	CTX	AUD	AUDd5	252	Dorsal auditory area, layer 5	#DIV/0!	#DIV/0!	#DIV/0!	#DIV/0!	#DIV/0!	#DIV/0!	#DIV/0!	#DIV/0!	#DIV/0!	#DIV/0!	#DIV/0!	#DIV/0!	#DIV/0!	#DIV/0!	#DIV/0!	#DIV/0!	#DIV/0!	#DIV/0!	#DIV/0!	#DIV/0!	#DIV/0!	#DIV/0!	#DIV/0!	#DIV/0!	#DIV/0!	#DIV/0!	#DIV/0!	#DIV/0!
129	CTX	AUD	AUDd6a	156	Dorsal auditory area, layer 6a	#DIV/0!	#DIV/0!	#DIV/0!	#DIV/0!	#DIV/0!	#DIV/0!	#DIV/0!	#DIV/0!	#DIV/0!	#DIV/0!	#DIV/0!	#DIV/0!	#DIV/0!	#DIV/0!	#DIV/0!	#DIV/0!	#DIV/0!	#DIV/0!	#DIV/0!	#DIV/0!	#DIV/0!	#DIV/0!	#DIV/0!	#DIV/0!	#DIV/0!	#DIV/0!	#DIV/0!	#DIV/0!
130	CTX	AUD	AUDd6b	243	Dorsal auditory area, layer 6b	#DIV/0!	#DIV/0!	#DIV/0!	#DIV/0!	#DIV/0!	#DIV/0!	#DIV/0!	#DIV/0!	#DIV/0!	#DIV/0!	#DIV/0!	#DIV/0!	#DIV/0!	#DIV/0!	#DIV/0!	#DIV/0!	#DIV/0!	#DIV/0!	#DIV/0!	#DIV/0!	#DIV/0!	#DIV/0!	#DIV/0!	#DIV/0!	#DIV/0!	#DIV/0!	#DIV/0!	#DIV/0!
131	CTX	AUD	VISlla	480149230	Laterolateral anterior visual area	#DIV/0!	#DIV/0!	#DIV/0!	#DIV/0!	#DIV/0!	#DIV/0!	#DIV/0!	#DIV/0!	#DIV/0!	#DIV/0!	#DIV/0!	#DIV/0!	#DIV/0!	#DIV/0!	#DIV/0!	#DIV/0!	#DIV/0!	#DIV/0!	#DIV/0!	#DIV/0!	#DIV/0!	#DIV/0!	#DIV/0!	#DIV/0!	#DIV/0!	#DIV/0!	#DIV/0!	#DIV/0!
132	CTX	AUD	VISlla1	480149234	Laterolateral anterior visual area, layer 1	#DIV/0!	#DIV/0!	#DIV/0!	#DIV/0!	#DIV/0!	#DIV/0!	#DIV/0!	#DIV/0!	#DIV/0!	#DIV/0!	#DIV/0!	#DIV/0!	#DIV/0!	#DIV/0!	#DIV/0!	#DIV/0!	#DIV/0!	#DIV/0!	#DIV/0!	#DIV/0!	#DIV/0!	#DIV/0!	#DIV/0!	#DIV/0!	#DIV/0!	#DIV/0!	#DIV/0!	#DIV/0!
133	CTX	AUD	VISlla2/3	480149238	Laterolateral anterior visual area, layer 2/3	#DIV/0!	#DIV/0!	#DIV/0!	#DIV/0!	#DIV/0!	#DIV/0!	#DIV/0!	#DIV/0!	#DIV/0!	#DIV/0!	#DIV/0!	#DIV/0!	#DIV/0!	#DIV/0!	#DIV/0!	#DIV/0!	#DIV/0!	#DIV/0!	#DIV/0!	#DIV/0!	#DIV/0!	#DIV/0!	#DIV/0!	#DIV/0!	#DIV/0!	#DIV/0!	#DIV/0!	#DIV/0!
134	CTX	AUD	VISlla4	480149242	Laterolateral anterior visual area, layer 4	#DIV/0!	#DIV/0!	#DIV/0!	#DIV/0!	#DIV/0!	#DIV/0!	#DIV/0!	#DIV/0!	#DIV/0!	#DIV/0!	#DIV/0!	#DIV/0!	#DIV/0!	#DIV/0!	#DIV/0!	#DIV/0!	#DIV/0!	#DIV/0!	#DIV/0!	#DIV/0!	#DIV/0!	#DIV/0!	#DIV/0!	#DIV/0!	#DIV/0!	#DIV/0!	#DIV/0!	#DIV/0!
135	CTX	AUD	VISlla5	480149246	Laterolateral anterior visual area,layer 5	#DIV/0!	#DIV/0!	#DIV/0!	#DIV/0!	#DIV/0!	#DIV/0!	#DIV/0!	#DIV/0!	#DIV/0!	#DIV/0!	#DIV/0!	#DIV/0!	#DIV/0!	#DIV/0!	#DIV/0!	#DIV/0!	#DIV/0!	#DIV/0!	#DIV/0!	#DIV/0!	#DIV/0!	#DIV/0!	#DIV/0!	#DIV/0!	#DIV/0!	#DIV/0!	#DIV/0!	#DIV/0!
136	CTX	AUD	VISlla6a	480149250	Laterolateral anterior visual area, layer 6a	#DIV/0!	#DIV/0!	#DIV/0!	#DIV/0!	#DIV/0!	#DIV/0!	#DIV/0!	#DIV/0!	#DIV/0!	#DIV/0!	#DIV/0!	#DIV/0!	#DIV/0!	#DIV/0!	#DIV/0!	#DIV/0!	#DIV/0!	#DIV/0!	#DIV/0!	#DIV/0!	#DIV/0!	#DIV/0!	#DIV/0!	#DIV/0!	#DIV/0!	#DIV/0!	#DIV/0!	#DIV/0!
137	CTX	AUD	VISlla6b	480149254	Laterolateral anterior visual area, layer 6b	#DIV/0!	#DIV/0!	#DIV/0!	#DIV/0!	#DIV/0!	#DIV/0!	#DIV/0!	#DIV/0!	#DIV/0!	#DIV/0!	#DIV/0!	#DIV/0!	#DIV/0!	#DIV/0!	#DIV/0!	#DIV/0!	#DIV/0!	#DIV/0!	#DIV/0!	#DIV/0!	#DIV/0!	#DIV/0!	#DIV/0!	#DIV/0!	#DIV/0!	#DIV/0!	#DIV/0!	#DIV/0!
138	CTX	AUD	AUDp	1002	Primary auditory area	#DIV/0!	#DIV/0!	#DIV/0!	#DIV/0!	#DIV/0!	#DIV/0!	#DIV/0!	#DIV/0!	#DIV/0!	#DIV/0!	#DIV/0!	#DIV/0!	#DIV/0!	#DIV/0!	#DIV/0!	#DIV/0!	#DIV/0!	#DIV/0!	#DIV/0!	#DIV/0!	#DIV/0!	#DIV/0!	#DIV/0!	#DIV/0!	#DIV/0!	#DIV/0!	#DIV/0!	#DIV/0!
139	CTX	AUD	AUDp1	735	Primary auditory area, layer 1	#DIV/0!	#DIV/0!	#DIV/0!	#DIV/0!	#DIV/0!	#DIV/0!	#DIV/0!	#DIV/0!	#DIV/0!	#DIV/0!	#DIV/0!	#DIV/0!	#DIV/0!	#DIV/0!	#DIV/0!	#DIV/0!	#DIV/0!	#DIV/0!	#DIV/0!	#DIV/0!	#DIV/0!	#DIV/0!	#DIV/0!	#DIV/0!	#DIV/0!	#DIV/0!	#DIV/0!	#DIV/0!
140	CTX	AUD	AUDp2/3	251	Primary auditory area, layer 2/3	#DIV/0!	#DIV/0!	#DIV/0!	#DIV/0!	#DIV/0!	#DIV/0!	#DIV/0!	#DIV/0!	#DIV/0!	#DIV/0!	#DIV/0!	#DIV/0!	#DIV/0!	#DIV/0!	#DIV/0!	#DIV/0!	#DIV/0!	#DIV/0!	#DIV/0!	#DIV/0!	#DIV/0!	#DIV/0!	#DIV/0!	#DIV/0!	#DIV/0!	#DIV/0!	#DIV/0!	#DIV/0!
141	CTX	AUD	AUDp4	816	Primary auditory area, layer 4	#DIV/0!	#DIV/0!	#DIV/0!	#DIV/0!	#DIV/0!	#DIV/0!	#DIV/0!	#DIV/0!	#DIV/0!	#DIV/0!	#DIV/0!	#DIV/0!	#DIV/0!	#DIV/0!	#DIV/0!	#DIV/0!	#DIV/0!	#DIV/0!	#DIV/0!	#DIV/0!	#DIV/0!	#DIV/0!	#DIV/0!	#DIV/0!	#DIV/0!	#DIV/0!	#DIV/0!	#DIV/0!
142	CTX	AUD	AUDp5	847	Primary auditory area, layer 5	#DIV/0!	#DIV/0!	#DIV/0!	#DIV/0!	#DIV/0!	#DIV/0!	#DIV/0!	#DIV/0!	#DIV/0!	#DIV/0!	#DIV/0!	#DIV/0!	#DIV/0!	#DIV/0!	#DIV/0!	#DIV/0!	#DIV/0!	#DIV/0!	#DIV/0!	#DIV/0!	#DIV/0!	#DIV/0!	#DIV/0!	#DIV/0!	#DIV/0!	#DIV/0!	#DIV/0!	#DIV/0!
143	CTX	AUD	AUDp6a	954	Primary auditory area, layer 6a	#DIV/0!	#DIV/0!	#DIV/0!	#DIV/0!	#DIV/0!	#DIV/0!	#DIV/0!	#DIV/0!	#DIV/0!	#DIV/0!	#DIV/0!	#DIV/0!	#DIV/0!	#DIV/0!	#DIV/0!	#DIV/0!	#DIV/0!	#DIV/0!	#DIV/0!	#DIV/0!	#DIV/0!	#DIV/0!	#DIV/0!	#DIV/0!	#DIV/0!	#DIV/0!	#DIV/0!	#DIV/0!
144	CTX	AUD	AUDp6b	1005	Primary auditory area, layer 6b	#DIV/0!	#DIV/0!	#DIV/0!	#DIV/0!	#DIV/0!	#DIV/0!	#DIV/0!	#DIV/0!	#DIV/0!	#DIV/0!	#DIV/0!	#DIV/0!	#DIV/0!	#DIV/0!	#DIV/0!	#DIV/0!	#DIV/0!	#DIV/0!	#DIV/0!	#DIV/0!	#DIV/0!	#DIV/0!	#DIV/0!	#DIV/0!	#DIV/0!	#DIV/0!	#DIV/0!	#DIV/0!
145	CTX	AUD	AUDpo	1027	Posterior auditory area	#DIV/0!	#DIV/0!	#DIV/0!	#DIV/0!	#DIV/0!	#DIV/0!	#DIV/0!	#DIV/0!	#DIV/0!	#DIV/0!	#DIV/0!	#DIV/0!	#DIV/0!	#DIV/0!	#DIV/0!	#DIV/0!	#DIV/0!	#DIV/0!	#DIV/0!	#DIV/0!	#DIV/0!	#DIV/0!	#DIV/0!	#DIV/0!	#DIV/0!	#DIV/0!	#DIV/0!	#DIV/0!
146	CTX	AUD	AUDpo1	696	Posterior auditory area, layer 1	#DIV/0!	#DIV/0!	#DIV/0!	#DIV/0!	#DIV/0!	#DIV/0!	#DIV/0!	#DIV/0!	#DIV/0!	#DIV/0!	#DIV/0!	#DIV/0!	#DIV/0!	#DIV/0!	#DIV/0!	#DIV/0!	#DIV/0!	#DIV/0!	#DIV/0!	#DIV/0!	#DIV/0!	#DIV/0!	#DIV/0!	#DIV/0!	#DIV/0!	#DIV/0!	#DIV/0!	#DIV/0!
147	CTX	AUD	AUDpo2/3	643	Posterior auditory area, layer 2/3	#DIV/0!	#DIV/0!	#DIV/0!	#DIV/0!	#DIV/0!	#DIV/0!	#DIV/0!	#DIV/0!	#DIV/0!	#DIV/0!	#DIV/0!	#DIV/0!	#DIV/0!	#DIV/0!	#DIV/0!	#DIV/0!	#DIV/0!	#DIV/0!	#DIV/0!	#DIV/0!	#DIV/0!	#DIV/0!	#DIV/0!	#DIV/0!	#DIV/0!	#DIV/0!	#DIV/0!	#DIV/0!
148	CTX	AUD	AUDpo4	759	Posterior auditory area, layer 4	#DIV/0!	#DIV/0!	#DIV/0!	#DIV/0!	#DIV/0!	#DIV/0!	#DIV/0!	#DIV/0!	#DIV/0!	#DIV/0!	#DIV/0!	#DIV/0!	#DIV/0!	#DIV/0!	#DIV/0!	#DIV/0!	#DIV/0!	#DIV/0!	#DIV/0!	#DIV/0!	#DIV/0!	#DIV/0!	#DIV/0!	#DIV/0!	#DIV/0!	#DIV/0!	#DIV/0!	#DIV/0!
149	CTX	AUD	AUDpo5	791	Posterior auditory area, layer 5	#DIV/0!	#DIV/0!	#DIV/0!	#DIV/0!	#DIV/0!	#DIV/0!	#DIV/0!	#DIV/0!	#DIV/0!	#DIV/0!	#DIV/0!	#DIV/0!	#DIV/0!	#DIV/0!	#DIV/0!	#DIV/0!	#DIV/0!	#DIV/0!	#DIV/0!	#DIV/0!	#DIV/0!	#DIV/0!	#DIV/0!	#DIV/0!	#DIV/0!	#DIV/0!	#DIV/0!	#DIV/0!
150	CTX	AUD	AUDpo6a	249	Posterior auditory area, layer 6a	#DIV/0!	#DIV/0!	#DIV/0!	#DIV/0!	#DIV/0!	#DIV/0!	#DIV/0!	#DIV/0!	#DIV/0!	#DIV/0!	#DIV/0!	#DIV/0!	#DIV/0!	#DIV/0!	#DIV/0!	#DIV/0!	#DIV/0!	#DIV/0!	#DIV/0!	#DIV/0!	#DIV/0!	#DIV/0!	#DIV/0!	#DIV/0!	#DIV/0!	#DIV/0!	#DIV/0!	#DIV/0!
151	CTX	AUD	AUDpo6b	456	Posterior auditory area, layer 6b	#DIV/0!	#DIV/0!	#DIV/0!	#DIV/0!	#DIV/0!	#DIV/0!	#DIV/0!	#DIV/0!	#DIV/0!	#DIV/0!	#DIV/0!	#DIV/0!	#DIV/0!	#DIV/0!	#DIV/0!	#DIV/0!	#DIV/0!	#DIV/0!	#DIV/0!	#DIV/0!	#DIV/0!	#DIV/0!	#DIV/0!	#DIV/0!	#DIV/0!	#DIV/0!	#DIV/0!	#DIV/0!
152	CTX	AUD	AUDv	1018	Ventral auditory area	#DIV/0!	#DIV/0!	#DIV/0!	#DIV/0!	#DIV/0!	#DIV/0!	#DIV/0!	#DIV/0!	#DIV/0!	#DIV/0!	#DIV/0!	#DIV/0!	#DIV/0!	#DIV/0!	#DIV/0!	#DIV/0!	#DIV/0!	#DIV/0!	#DIV/0!	#DIV/0!	#DIV/0!	#DIV/0!	#DIV/0!	#DIV/0!	#DIV/0!	#DIV/0!	#DIV/0!	#DIV/0!
153	CTX	AUD	AUDv1	959	Ventral auditory area, layer 1	#DIV/0!	#DIV/0!	#DIV/0!	#DIV/0!	#DIV/0!	#DIV/0!	#DIV/0!	#DIV/0!	#DIV/0!	#DIV/0!	#DIV/0!	#DIV/0!	#DIV/0!	#DIV/0!	#DIV/0!	#DIV/0!	#DIV/0!	#DIV/0!	#DIV/0!	#DIV/0!	#DIV/0!	#DIV/0!	#DIV/0!	#DIV/0!	#DIV/0!	#DIV/0!	#DIV/0!	#DIV/0!
154	CTX	AUD	AUDv2/3	755	Ventral auditory area, layer 2/3	#DIV/0!	#DIV/0!	#DIV/0!	#DIV/0!	#DIV/0!	#DIV/0!	#DIV/0!	#DIV/0!	#DIV/0!	#DIV/0!	#DIV/0!	#DIV/0!	#DIV/0!	#DIV/0!	#DIV/0!	#DIV/0!	#DIV/0!	#DIV/0!	#DIV/0!	#DIV/0!	#DIV/0!	#DIV/0!	#DIV/0!	#DIV/0!	#DIV/0!	#DIV/0!	#DIV/0!	#DIV/0!
155	CTX	AUD	AUDv4	990	Ventral auditory area, layer 4	#DIV/0!	#DIV/0!	#DIV/0!	#DIV/0!	#DIV/0!	#DIV/0!	#DIV/0!	#DIV/0!	#DIV/0!	#DIV/0!	#DIV/0!	#DIV/0!	#DIV/0!	#DIV/0!	#DIV/0!	#DIV/0!	#DIV/0!	#DIV/0!	#DIV/0!	#DIV/0!	#DIV/0!	#DIV/0!	#DIV/0!	#DIV/0!	#DIV/0!	#DIV/0!	#DIV/0!	#DIV/0!
156	CTX	AUD	AUDv5	1023	Ventral auditory area, layer 5	#DIV/0!	#DIV/0!	#DIV/0!	#DIV/0!	#DIV/0!	#DIV/0!	#DIV/0!	#DIV/0!	#DIV/0!	#DIV/0!	#DIV/0!	#DIV/0!	#DIV/0!	#DIV/0!	#DIV/0!	#DIV/0!	#DIV/0!	#DIV/0!	#DIV/0!	#DIV/0!	#DIV/0!	#DIV/0!	#DIV/0!	#DIV/0!	#DIV/0!	#DIV/0!	#DIV/0!	#DIV/0!
157	CTX	AUD	AUDv6a	520	Ventral auditory area, layer 6a	#DIV/0!	#DIV/0!	#DIV/0!	#DIV/0!	#DIV/0!	#DIV/0!	#DIV/0!	#DIV/0!	#DIV/0!	#DIV/0!	#DIV/0!	#DIV/0!	#DIV/0!	#DIV/0!	#DIV/0!	#DIV/0!	#DIV/0!	#DIV/0!	#DIV/0!	#DIV/0!	#DIV/0!	#DIV/0!	#DIV/0!	#DIV/0!	#DIV/0!	#DIV/0!	#DIV/0!	#DIV/0!
158	CTX	AUD	AUDv6b	598	Ventral auditory area, layer 6b	#DIV/0!	#DIV/0!	#DIV/0!	#DIV/0!	#DIV/0!	#DIV/0!	#DIV/0!	#DIV/0!	#DIV/0!	#DIV/0!	#DIV/0!	#DIV/0!	#DIV/0!	#DIV/0!	#DIV/0!	#DIV/0!	#DIV/0!	#DIV/0!	#DIV/0!	#DIV/0!	#DIV/0!	#DIV/0!	#DIV/0!	#DIV/0!	#DIV/0!	#DIV/0!	#DIV/0!	#DIV/0!
159	CTX	VIS	VIS	669	Visual areas	#DIV/0!	#DIV/0!	#DIV/0!	#DIV/0!	#DIV/0!	#DIV/0!	#DIV/0!	#DIV/0!	#DIV/0!	#DIV/0!	#DIV/0!	#DIV/0!	#DIV/0!	#DIV/0!	#DIV/0!	#DIV/0!	#DIV/0!	#DIV/0!	#DIV/0!	#DIV/0!	#DIV/0!	#DIV/0!	#DIV/0!	#DIV/0!	#DIV/0!	#DIV/0!	#DIV/0!	#DIV/0!
160	CTX	VIS	VIS1	801	Visual areas, layer 1	#DIV/0!	#DIV/0!	#DIV/0!	#DIV/0!	#DIV/0!	#DIV/0!	#DIV/0!	#DIV/0!	#DIV/0!	#DIV/0!	#DIV/0!	#DIV/0!	#DIV/0!	#DIV/0!	#DIV/0!	#DIV/0!	#DIV/0!	#DIV/0!	#DIV/0!	#DIV/0!	#DIV/0!	#DIV/0!	#DIV/0!	#DIV/0!	#DIV/0!	#DIV/0!	#DIV/0!	#DIV/0!
161	CTX	VIS	VIS2/3	561	Visual areas, layer 2/3	#DIV/0!	#DIV/0!	#DIV/0!	#DIV/0!	#DIV/0!	#DIV/0!	#DIV/0!	#DIV/0!	#DIV/0!	#DIV/0!	#DIV/0!	#DIV/0!	#DIV/0!	#DIV/0!	#DIV/0!	#DIV/0!	#DIV/0!	#DIV/0!	#DIV/0!	#DIV/0!	#DIV/0!	#DIV/0!	#DIV/0!	#DIV/0!	#DIV/0!	#DIV/0!	#DIV/0!	#DIV/0!
162	CTX	VIS	VIS4	913	Visual areas, layer 4	#DIV/0!	#DIV/0!	#DIV/0!	#DIV/0!	#DIV/0!	#DIV/0!	#DIV/0!	#DIV/0!	#DIV/0!	#DIV/0!	#DIV/0!	#DIV/0!	#DIV/0!	#DIV/0!	#DIV/0!	#DIV/0!	#DIV/0!	#DIV/0!	#DIV/0!	#DIV/0!	#DIV/0!	#DIV/0!	#DIV/0!	#DIV/0!	#DIV/0!	#DIV/0!	#DIV/0!	#DIV/0!
163	CTX	VIS	VIS5	937	Visual areas, layer 5	#DIV/0!	#DIV/0!	#DIV/0!	#DIV/0!	#DIV/0!	#DIV/0!	#DIV/0!	#DIV/0!	#DIV/0!	#DIV/0!	#DIV/0!	#DIV/0!	#DIV/0!	#DIV/0!	#DIV/0!	#DIV/0!	#DIV/0!	#DIV/0!	#DIV/0!	#DIV/0!	#DIV/0!	#DIV/0!	#DIV/0!	#DIV/0!	#DIV/0!	#DIV/0!	#DIV/0!	#DIV/0!
164	CTX	VIS	VIS6a	457	Visual areas, layer 6a	#DIV/0!	#DIV/0!	#DIV/0!	#DIV/0!	#DIV/0!	#DIV/0!	#DIV/0!	#DIV/0!	#DIV/0!	#DIV/0!	#DIV/0!	#DIV/0!	#DIV/0!	#DIV/0!	#DIV/0!	#DIV/0!	#DIV/0!	#DIV/0!	#DIV/0!	#DIV/0!	#DIV/0!	#DIV/0!	#DIV/0!	#DIV/0!	#DIV/0!	#DIV/0!	#DIV/0!	#DIV/0!
165	CTX	VIS	VIS6b	497	Visual areas, layer 6b	#DIV/0!	#DIV/0!	#DIV/0!	#DIV/0!	#DIV/0!	#DIV/0!	#DIV/0!	#DIV/0!	#DIV/0!	#DIV/0!	#DIV/0!	#DIV/0!	#DIV/0!	#DIV/0!	#DIV/0!	#DIV/0!	#DIV/0!	#DIV/0!	#DIV/0!	#DIV/0!	#DIV/0!	#DIV/0!	#DIV/0!	#DIV/0!	#DIV/0!	#DIV/0!	#DIV/0!	#DIV/0!
166	CTX	VIS	VISal	402	Anterolateral visual area	#DIV/0!	#DIV/0!	#DIV/0!	#DIV/0!	#DIV/0!	#DIV/0!	#DIV/0!	#DIV/0!	#DIV/0!	#DIV/0!	#DIV/0!	#DIV/0!	#DIV/0!	#DIV/0!	#DIV/0!	#DIV/0!	#DIV/0!	#DIV/0!	#DIV/0!	#DIV/0!	#DIV/0!	#DIV/0!	#DIV/0!	#DIV/0!	#DIV/0!	#DIV/0!	#DIV/0!	#DIV/0!
167	CTX	VIS	VISal1	1074	Anterolateral visual area, layer 1	#DIV/0!	#DIV/0!	#DIV/0!	#DIV/0!	#DIV/0!	#DIV/0!	#DIV/0!	#DIV/0!	#DIV/0!	#DIV/0!	#DIV/0!	#DIV/0!	#DIV/0!	#DIV/0!	#DIV/0!	#DIV/0!	#DIV/0!	#DIV/0!	#DIV/0!	#DIV/0!	#DIV/0!	#DIV/0!	#DIV/0!	#DIV/0!	#DIV/0!	#DIV/0!	#DIV/0!	#DIV/0!
168	CTX	VIS	VISal2/3	905	Anterolateral visual area, layer 2/3	#DIV/0!	#DIV/0!	#DIV/0!	#DIV/0!	#DIV/0!	#DIV/0!	#DIV/0!	#DIV/0!	#DIV/0!	#DIV/0!	#DIV/0!	#DIV/0!	#DIV/0!	#DIV/0!	#DIV/0!	#DIV/0!	#DIV/0!	#DIV/0!	#DIV/0!	#DIV/0!	#DIV/0!	#DIV/0!	#DIV/0!	#DIV/0!	#DIV/0!	#DIV/0!	#DIV/0!	#DIV/0!
169	CTX	VIS	VISal4	1114	Anterolateral visual area, layer 4	#DIV/0!	#DIV/0!	#DIV/0!	#DIV/0!	#DIV/0!	#DIV/0!	#DIV/0!	#DIV/0!	#DIV/0!	#DIV/0!	#DIV/0!	#DIV/0!	#DIV/0!	#DIV/0!	#DIV/0!	#DIV/0!	#DIV/0!	#DIV/0!	#DIV/0!	#DIV/0!	#DIV/0!	#DIV/0!	#DIV/0!	#DIV/0!	#DIV/0!	#DIV/0!	#DIV/0!	#DIV/0!
170	CTX	VIS	VISal5	233	Anterolateral visual area, layer 5	#DIV/0!	#DIV/0!	#DIV/0!	#DIV/0!	#DIV/0!	#DIV/0!	#DIV/0!	#DIV/0!	#DIV/0!	#DIV/0!	#DIV/0!	#DIV/0!	#DIV/0!	#DIV/0!	#DIV/0!	#DIV/0!	#DIV/0!	#DIV/0!	#DIV/0!	#DIV/0!	#DIV/0!	#DIV/0!	#DIV/0!	#DIV/0!	#DIV/0!	#DIV/0!	#DIV/0!	#DIV/0!
171	CTX	VIS	VISal6a	601	Anterolateral visual area, layer 6a	#DIV/0!	#DIV/0!	#DIV/0!	#DIV/0!	#DIV/0!	#DIV/0!	#DIV/0!	#DIV/0!	#DIV/0!	#DIV/0!	#DIV/0!	#DIV/0!	#DIV/0!	#DIV/0!	#DIV/0!	#DIV/0!	#DIV/0!	#DIV/0!	#DIV/0!	#DIV/0!	#DIV/0!	#DIV/0!	#DIV/0!	#DIV/0!	#DIV/0!	#DIV/0!	#DIV/0!	#DIV/0!
172	CTX	VIS	VISal6b	649	Anterolateral visual area, layer 6b	#DIV/0!	#DIV/0!	#DIV/0!	#DIV/0!	#DIV/0!	#DIV/0!	#DIV/0!	#DIV/0!	#DIV/0!	#DIV/0!	#DIV/0!	#DIV/0!	#DIV/0!	#DIV/0!	#DIV/0!	#DIV/0!	#DIV/0!	#DIV/0!	#DIV/0!	#DIV/0!	#DIV/0!	#DIV/0!	#DIV/0!	#DIV/0!	#DIV/0!	#DIV/0!	#DIV/0!	#DIV/0!
173	CTX	VIS	VISam	394	Anteromedial visual area	#DIV/0!	#DIV/0!	#DIV/0!	#DIV/0!	#DIV/0!	#DIV/0!	#DIV/0!	#DIV/0!	#DIV/0!	#DIV/0!	#DIV/0!	#DIV/0!	#DIV/0!	#DIV/0!	#DIV/0!	#DIV/0!	#DIV/0!	#DIV/0!	#DIV/0!	#DIV/0!	#DIV/0!	#DIV/0!	#DIV/0!	#DIV/0!	#DIV/0!	#DIV/0!	#DIV/0!	#DIV/0!
174	CTX	VIS	VISam1	281	Anteromedial visual area, layer 1	#DIV/0!	#DIV/0!	#DIV/0!	#DIV/0!	#DIV/0!	#DIV/0!	0.0242203	#DIV/0!	0.0257819	#DIV/0!	#DIV/0!	#DIV/0!	#DIV/0!	#DIV/0!	#DIV/0!	#DIV/0!	#DIV/0!	#DIV/0!	#DIV/0!	#DIV/0!	0.00319454	0.00354321	#DIV/0!	#DIV/0!	#DIV/0!	#DIV/0!	#DIV/0!	#DIV/0!
175	CTX	VIS	VISam2/3	1066	Anteromedial visual area, layer 2/3	#DIV/0!	#DIV/0!	#DIV/0!	#DIV/0!	#DIV/0!	#DIV/0!	0.113954	#DIV/0!	0.446569	#DIV/0!	#DIV/0!	#DIV/0!	#DIV/0!	#DIV/0!	#DIV/0!	#DIV/0!	#DIV/0!	#DIV/0!	#DIV/0!	#DIV/0!	0.013003	0.0361098	#DIV/0!	#DIV/0!	#DIV/0!	#DIV/0!	#DIV/0!	#DIV/0!
176	CTX	VIS	VISam4	401	Anteromedial visual area, layer 4	#DIV/0!	#DIV/0!	#DIV/0!	#DIV/0!	#DIV/0!	#DIV/0!	0.141467	#DIV/0!	0.0335663	#DIV/0!	#DIV/0!	#DIV/0!	#DIV/0!	#DIV/0!	#DIV/0!	#DIV/0!	#DIV/0!	#DIV/0!	#DIV/0!	#DIV/0!	0.00766554	0.0472595	#DIV/0!	#DIV/0!	#DIV/0!	#DIV/0!	#DIV/0!	#DIV/0!
177	CTX	VIS	VISam5	433	Anteromedial visual area, layer 5	#DIV/0!	#DIV/0!	#DIV/0!	#DIV/0!	#DIV/0!	#DIV/0!	0.117073	#DIV/0!	0.234545	#DIV/0!	#DIV/0!	#DIV/0!	#DIV/0!	#DIV/0!	#DIV/0!	#DIV/0!	#DIV/0!	#DIV/0!	#DIV/0!	#DIV/0!	0.0263186	0.0445505	#DIV/0!	#DIV/0!	#DIV/0!	#DIV/0!	#DIV/0!	#DIV/0!
178	CTX	VIS	VISam6a	1046	Anteromedial visual area, layer 6a	#DIV/0!	#DIV/0!	#DIV/0!	#DIV/0!	#DIV/0!	#DIV/0!	0.109245	#DIV/0!	0.82301	#DIV/0!	#DIV/0!	#DIV/0!	#DIV/0!	#DIV/0!	#DIV/0!	#DIV/0!	#DIV/0!	#DIV/0!	#DIV/0!	#DIV/0!	0.0230537	0.0532146	#DIV/0!	#DIV/0!	#DIV/0!	#DIV/0!	#DIV/0!	#DIV/0!
179	CTX	VIS	VISam6b	441	Anteromedial visual area, layer 6b	#DIV/0!	#DIV/0!	#DIV/0!	#DIV/0!	#DIV/0!	#DIV/0!	0.0651387	#DIV/0!	#DIV/0!	#DIV/0!	#DIV/0!	#DIV/0!	#DIV/0!	#DIV/0!	#DIV/0!	#DIV/0!	#DIV/0!	#DIV/0!	#DIV/0!	#DIV/0!	0.0421714	0.0327037	#DIV/0!	#DIV/0!	#DIV/0!	#DIV/0!	#DIV/0!	#DIV/0!
180	CTX	VIS	VISl	409	Lateral visual area	#DIV/0!	#DIV/0!	#DIV/0!	#DIV/0!	#DIV/0!	#DIV/0!	#DIV/0!	#DIV/0!	#DIV/0!	#DIV/0!	#DIV/0!	#DIV/0!	#DIV/0!	#DIV/0!	#DIV/0!	#DIV/0!	#DIV/0!	#DIV/0!	#DIV/0!	#DIV/0!	#DIV/0!	#DIV/0!	#DIV/0!	#DIV/0!	#DIV/0!	#DIV/0!	#DIV/0!	#DIV/0!
181	CTX	VIS	VISl1	421	Lateral visual area, layer 1	#DIV/0!	#DIV/0!	#DIV/0!	#DIV/0!	#DIV/0!	#DIV/0!	#DIV/0!	#DIV/0!	#DIV/0!	#DIV/0!	#DIV/0!	#DIV/0!	#DIV/0!	#DIV/0!	#DIV/0!	#DIV/0!	#DIV/0!	#DIV/0!	#DIV/0!	#DIV/0!	#DIV/0!	#DIV/0!	#DIV/0!	#DIV/0!	#DIV/0!	#DIV/0!	#DIV/0!	#DIV/0!
182	CTX	VIS	VISl2/3	973	Lateral visual area, layer 2/3	#DIV/0!	#DIV/0!	#DIV/0!	#DIV/0!	#DIV/0!	#DIV/0!	#DIV/0!	#DIV/0!	#DIV/0!	#DIV/0!	#DIV/0!	#DIV/0!	#DIV/0!	#DIV/0!	#DIV/0!	#DIV/0!	#DIV/0!	#DIV/0!	#DIV/0!	#DIV/0!	#DIV/0!	#DIV/0!	#DIV/0!	#DIV/0!	#DIV/0!	#DIV/0!	#DIV/0!	#DIV/0!
183	CTX	VIS	VISl4	573	Lateral visual area, layer 4	#DIV/0!	#DIV/0!	#DIV/0!	#DIV/0!	#DIV/0!	#DIV/0!	#DIV/0!	#DIV/0!	#DIV/0!	#DIV/0!	#DIV/0!	#DIV/0!	#DIV/0!	#DIV/0!	#DIV/0!	#DIV/0!	#DIV/0!	#DIV/0!	#DIV/0!	#DIV/0!	#DIV/0!	#DIV/0!	#DIV/0!	#DIV/0!	#DIV/0!	#DIV/0!	#DIV/0!	#DIV/0!
184	CTX	VIS	VISl5	613	Lateral visual area, layer 5	#DIV/0!	#DIV/0!	#DIV/0!	#DIV/0!	#DIV/0!	#DIV/0!	#DIV/0!	#DIV/0!	#DIV/0!	#DIV/0!	#DIV/0!	#DIV/0!	#DIV/0!	#DIV/0!	#DIV/0!	#DIV/0!	#DIV/0!	#DIV/0!	#DIV/0!	#DIV/0!	#DIV/0!	#DIV/0!	#DIV/0!	#DIV/0!	#DIV/0!	#DIV/0!	#DIV/0!	#DIV/0!
185	CTX	VIS	VISl6a	74	Lateral visual area, layer 6a	#DIV/0!	#DIV/0!	#DIV/0!	#DIV/0!	#DIV/0!	#DIV/0!	#DIV/0!	#DIV/0!	#DIV/0!	#DIV/0!	#DIV/0!	#DIV/0!	#DIV/0!	#DIV/0!	#DIV/0!	#DIV/0!	#DIV/0!	#DIV/0!	#DIV/0!	#DIV/0!	#DIV/0!	#DIV/0!	#DIV/0!	#DIV/0!	#DIV/0!	#DIV/0!	#DIV/0!	#DIV/0!
186	CTX	VIS	VISl6b	121	Lateral visual area, layer 6b	#DIV/0!	#DIV/0!	#DIV/0!	#DIV/0!	#DIV/0!	#DIV/0!	#DIV/0!	#DIV/0!	#DIV/0!	#DIV/0!	#DIV/0!	#DIV/0!	#DIV/0!	#DIV/0!	#DIV/0!	#DIV/0!	#DIV/0!	#DIV/0!	#DIV/0!	#DIV/0!	#DIV/0!	#DIV/0!	#DIV/0!	#DIV/0!	#DIV/0!	#DIV/0!	#DIV/0!	#DIV/0!
187	CTX	VIS	VISp	385	Primary visual area	#DIV/0!	#DIV/0!	#DIV/0!	#DIV/0!	#DIV/0!	#DIV/0!	#DIV/0!	#DIV/0!	#DIV/0!	#DIV/0!	#DIV/0!	#DIV/0!	#DIV/0!	#DIV/0!	#DIV/0!	#DIV/0!	#DIV/0!	#DIV/0!	#DIV/0!	#DIV/0!	#DIV/0!	#DIV/0!	#DIV/0!	#DIV/0!	#DIV/0!	#DIV/0!	#DIV/0!	#DIV/0!
188	CTX	VIS	VISp1	593	Primary visual area, layer 1	#DIV/0!	#DIV/0!	#DIV/0!	#DIV/0!	#DIV/0!	#DIV/0!	0.00870527	#DIV/0!	0.0279843	#DIV/0!	#DIV/0!	#DIV/0!	#DIV/0!	#DIV/0!	#DIV/0!	#DIV/0!	#DIV/0!	#DIV/0!	#DIV/0!	#DIV/0!	0.00941936	0.0024684	#DIV/0!	#DIV/0!	#DIV/0!	#DIV/0!	#DIV/0!	#DIV/0!
189	CTX	VIS	VISp2/3	821	Primary visual area, layer 2/3	#DIV/0!	#DIV/0!	#DIV/0!	#DIV/0!	#DIV/0!	#DIV/0!	0.0519501	#DIV/0!	0.75992	#DIV/0!	#DIV/0!	#DIV/0!	#DIV/0!	#DIV/0!	#DIV/0!	#DIV/0!	#DIV/0!	#DIV/0!	#DIV/0!	#DIV/0!	0.0114313	0.0211969	#DIV/0!	#DIV/0!	#DIV/0!	#DIV/0!	#DIV/0!	#DIV/0!
190	CTX	VIS	VISp4	721	Primary visual area, layer 4	#DIV/0!	#DIV/0!	#DIV/0!	#DIV/0!	#DIV/0!	#DIV/0!	0.130693	#DIV/0!	#DIV/0!	#DIV/0!	#DIV/0!	#DIV/0!	#DIV/0!	#DIV/0!	#DIV/0!	#DIV/0!	#DIV/0!	#DIV/0!	#DIV/0!	#DIV/0!	0.0190526	0.0166476	#DIV/0!	#DIV/0!	#DIV/0!	#DIV/0!	#DIV/0!	#DIV/0!
191	CTX	VIS	VISp5	778	Primary visual area, layer 5	#DIV/0!	#DIV/0!	#DIV/0!	#DIV/0!	#DIV/0!	#DIV/0!	0.0883273	#DIV/0!	#DIV/0!	#DIV/0!	#DIV/0!	#DIV/0!	#DIV/0!	#DIV/0!	#DIV/0!	#DIV/0!	#DIV/0!	#DIV/0!	#DIV/0!	#DIV/0!	0.0221948	0.0416469	#DIV/0!	#DIV/0!	#DIV/0!	#DIV/0!	#DIV/0!	#DIV/0!
192	CTX	VIS	VISp6a	33	Primary visual area, layer 6a	#DIV/0!	#DIV/0!	#DIV/0!	#DIV/0!	#DIV/0!	#DIV/0!	#DIV/0!	#DIV/0!	#DIV/0!	#DIV/0!	#DIV/0!	#DIV/0!	#DIV/0!	#DIV/0!	#DIV/0!	#DIV/0!	#DIV/0!	#DIV/0!	#DIV/0!	#DIV/0!	0.0251827	#DIV/0!	#DIV/0!	#DIV/0!	#DIV/0!	#DIV/0!	#DIV/0!	#DIV/0!
193	CTX	VIS	VISp6b	305	Primary visual area, layer 6b	#DIV/0!	#DIV/0!	#DIV/0!	#DIV/0!	#DIV/0!	#DIV/0!	#DIV/0!	#DIV/0!	#DIV/0!	#DIV/0!	#DIV/0!	#DIV/0!	#DIV/0!	#DIV/0!	#DIV/0!	#DIV/0!	#DIV/0!	#DIV/0!	#DIV/0!	#DIV/0!	#DIV/0!	#DIV/0!	#DIV/0!	#DIV/0!	#DIV/0!	#DIV/0!	#DIV/0!	#DIV/0!
194	CTX	VIS	VISpl	425	Posterolateral visual area	#DIV/0!	#DIV/0!	#DIV/0!	#DIV/0!	#DIV/0!	#DIV/0!	#DIV/0!	#DIV/0!	#DIV/0!	#DIV/0!	#DIV/0!	#DIV/0!	#DIV/0!	#DIV/0!	#DIV/0!	#DIV/0!	#DIV/0!	#DIV/0!	#DIV/0!	#DIV/0!	#DIV/0!	#DIV/0!	#DIV/0!	#DIV/0!	#DIV/0!	#DIV/0!	#DIV/0!	#DIV/0!
195	CTX	VIS	VISpl1	750	Posterolateral visual area, layer 1	#DIV/0!	#DIV/0!	#DIV/0!	#DIV/0!	#DIV/0!	#DIV/0!	#DIV/0!	#DIV/0!	#DIV/0!	#DIV/0!	#DIV/0!	#DIV/0!	#DIV/0!	#DIV/0!	#DIV/0!	#DIV/0!	#DIV/0!	#DIV/0!	#DIV/0!	#DIV/0!	#DIV/0!	#DIV/0!	#DIV/0!	#DIV/0!	#DIV/0!	#DIV/0!	#DIV/0!	#DIV/0!
196	CTX	VIS	VISpl2/3	269	Posterolateral visual area, layer 2/3	#DIV/0!	#DIV/0!	#DIV/0!	#DIV/0!	#DIV/0!	#DIV/0!	#DIV/0!	#DIV/0!	#DIV/0!	#DIV/0!	#DIV/0!	#DIV/0!	#DIV/0!	#DIV/0!	#DIV/0!	#DIV/0!	#DIV/0!	#DIV/0!	#DIV/0!	#DIV/0!	#DIV/0!	#DIV/0!	#DIV/0!	#DIV/0!	#DIV/0!	#DIV/0!	#DIV/0!	#DIV/0!
197	CTX	VIS	VISpl4	869	Posterolateral visual area, layer 4	#DIV/0!	#DIV/0!	#DIV/0!	#DIV/0!	#DIV/0!	#DIV/0!	#DIV/0!	#DIV/0!	#DIV/0!	#DIV/0!	#DIV/0!	#DIV/0!	#DIV/0!	#DIV/0!	#DIV/0!	#DIV/0!	#DIV/0!	#DIV/0!	#DIV/0!	#DIV/0!	#DIV/0!	#DIV/0!	#DIV/0!	#DIV/0!	#DIV/0!	#DIV/0!	#DIV/0!	#DIV/0!
198	CTX	VIS	VISpl5	902	Posterolateral visual area, layer 5	#DIV/0!	#DIV/0!	#DIV/0!	#DIV/0!	#DIV/0!	#DIV/0!	#DIV/0!	#DIV/0!	#DIV/0!	#DIV/0!	#DIV/0!	#DIV/0!	#DIV/0!	#DIV/0!	#DIV/0!	#DIV/0!	#DIV/0!	#DIV/0!	#DIV/0!	#DIV/0!	#DIV/0!	#DIV/0!	#DIV/0!	#DIV/0!	#DIV/0!	#DIV/0!	#DIV/0!	#DIV/0!
199	CTX	VIS	VISpl6a	377	Posterolateral visual area, layer 6a	#DIV/0!	#DIV/0!	#DIV/0!	#DIV/0!	#DIV/0!	#DIV/0!	#DIV/0!	#DIV/0!	#DIV/0!	#DIV/0!	#DIV/0!	#DIV/0!	#DIV/0!	#DIV/0!	#DIV/0!	#DIV/0!	#DIV/0!	#DIV/0!	#DIV/0!	#DIV/0!	#DIV/0!	#DIV/0!	#DIV/0!	#DIV/0!	#DIV/0!	#DIV/0!	#DIV/0!	#DIV/0!
200	CTX	VIS	VISpl6b	393	Posterolateral visual area, layer 6b	#DIV/0!	#DIV/0!	#DIV/0!	#DIV/0!	#DIV/0!	#DIV/0!	#DIV/0!	#DIV/0!	#DIV/0!	#DIV/0!	#DIV/0!	#DIV/0!	#DIV/0!	#DIV/0!	#DIV/0!	#DIV/0!	#DIV/0!	#DIV/0!	#DIV/0!	#DIV/0!	#DIV/0!	#DIV/0!	#DIV/0!	#DIV/0!	#DIV/0!	#DIV/0!	#DIV/0!	#DIV/0!
201	CTX	VIS	VISpm	533	posteromedial visual area	#DIV/0!	#DIV/0!	#DIV/0!	#DIV/0!	#DIV/0!	#DIV/0!	#DIV/0!	#DIV/0!	#DIV/0!	#DIV/0!	#DIV/0!	#DIV/0!	#DIV/0!	#DIV/0!	#DIV/0!	#DIV/0!	#DIV/0!	#DIV/0!	#DIV/0!	#DIV/0!	#DIV/0!	#DIV/0!	#DIV/0!	#DIV/0!	#DIV/0!	#DIV/0!	#DIV/0!	#DIV/0!
202	CTX	VIS	VISpm1	805	posteromedial visual area, layer 1	#DIV/0!	#DIV/0!	#DIV/0!	#DIV/0!	#DIV/0!	#DIV/0!	0.0293929	#DIV/0!	0.0239892	#DIV/0!	#DIV/0!	#DIV/0!	#DIV/0!	#DIV/0!	#DIV/0!	#DIV/0!	#DIV/0!	#DIV/0!	#DIV/0!	#DIV/0!	0.00522329	0.00479265	#DIV/0!	#DIV/0!	#DIV/0!	#DIV/0!	#DIV/0!	#DIV/0!
203	CTX	VIS	VISpm2/3	41	posteromedial visual area, layer 2/3	#DIV/0!	#DIV/0!	#DIV/0!	#DIV/0!	#DIV/0!	#DIV/0!	0.12555	#DIV/0!	0.307945	#DIV/0!	#DIV/0!	#DIV/0!	#DIV/0!	#DIV/0!	#DIV/0!	#DIV/0!	#DIV/0!	#DIV/0!	#DIV/0!	#DIV/0!	0.0163862	0.0191537	#DIV/0!	#DIV/0!	#DIV/0!	#DIV/0!	#DIV/0!	#DIV/0!
204	CTX	VIS	VISpm4	501	posteromedial visual area, layer 4	#DIV/0!	#DIV/0!	#DIV/0!	#DIV/0!	#DIV/0!	#DIV/0!	0.134611	#DIV/0!	0.0374688	#DIV/0!	#DIV/0!	#DIV/0!	#DIV/0!	#DIV/0!	#DIV/0!	#DIV/0!	#DIV/0!	#DIV/0!	#DIV/0!	#DIV/0!	0.0159748	0.0508798	#DIV/0!	#DIV/0!	#DIV/0!	#DIV/0!	#DIV/0!	#DIV/0!
205	CTX	VIS	VISpm5	565	posteromedial visual area, layer 5	#DIV/0!	#DIV/0!	#DIV/0!	#DIV/0!	#DIV/0!	#DIV/0!	0.101831	#DIV/0!	0.443158	#DIV/0!	#DIV/0!	#DIV/0!	#DIV/0!	#DIV/0!	#DIV/0!	#DIV/0!	#DIV/0!	#DIV/0!	#DIV/0!	#DIV/0!	0.0243992	0.0432419	#DIV/0!	#DIV/0!	#DIV/0!	#DIV/0!	#DIV/0!	#DIV/0!
206	CTX	VIS	VISpm6a	257	posteromedial visual area, layer 6a	#DIV/0!	#DIV/0!	#DIV/0!	#DIV/0!	#DIV/0!	#DIV/0!	0.0918415	#DIV/0!	0.469983	#DIV/0!	#DIV/0!	#DIV/0!	#DIV/0!	#DIV/0!	#DIV/0!	#DIV/0!	#DIV/0!	#DIV/0!	#DIV/0!	#DIV/0!	0.0375125	0.05351	#DIV/0!	#DIV/0!	#DIV/0!	#DIV/0!	#DIV/0!	#DIV/0!
207	CTX	VIS	VISpm6b	469	posteromedial visual area, layer 6b	#DIV/0!	#DIV/0!	#DIV/0!	#DIV/0!	#DIV/0!	#DIV/0!	0.100635	#DIV/0!	#DIV/0!	#DIV/0!	#DIV/0!	#DIV/0!	#DIV/0!	#DIV/0!	#DIV/0!	#DIV/0!	#DIV/0!	#DIV/0!	#DIV/0!	#DIV/0!	0.0386498	0.0695547	#DIV/0!	#DIV/0!	#DIV/0!	#DIV/0!	#DIV/0!	#DIV/0!
208	CTX	VIS	VISli	312782574	Laterointermediate area	#DIV/0!	#DIV/0!	#DIV/0!	#DIV/0!	#DIV/0!	#DIV/0!	#DIV/0!	#DIV/0!	#DIV/0!	#DIV/0!	#DIV/0!	#DIV/0!	#DIV/0!	#DIV/0!	#DIV/0!	#DIV/0!	#DIV/0!	#DIV/0!	#DIV/0!	#DIV/0!	#DIV/0!	#DIV/0!	#DIV/0!	#DIV/0!	#DIV/0!	#DIV/0!	#DIV/0!	#DIV/0!
209	CTX	VIS	VISli1	312782578	Laterointermediate area, layer 1	#DIV/0!	#DIV/0!	#DIV/0!	#DIV/0!	#DIV/0!	#DIV/0!	#DIV/0!	#DIV/0!	#DIV/0!	#DIV/0!	#DIV/0!	#DIV/0!	#DIV/0!	#DIV/0!	#DIV/0!	#DIV/0!	#DIV/0!	#DIV/0!	#DIV/0!	#DIV/0!	#DIV/0!	#DIV/0!	#DIV/0!	#DIV/0!	#DIV/0!	#DIV/0!	#DIV/0!	#DIV/0!
210	CTX	VIS	VISli2/3	312782582	Laterointermediate area, layer 2/3	#DIV/0!	#DIV/0!	#DIV/0!	#DIV/0!	#DIV/0!	#DIV/0!	#DIV/0!	#DIV/0!	#DIV/0!	#DIV/0!	#DIV/0!	#DIV/0!	#DIV/0!	#DIV/0!	#DIV/0!	#DIV/0!	#DIV/0!	#DIV/0!	#DIV/0!	#DIV/0!	#DIV/0!	#DIV/0!	#DIV/0!	#DIV/0!	#DIV/0!	#DIV/0!	#DIV/0!	#DIV/0!
211	CTX	VIS	VISli4	312782586	Laterointermediate area, layer 4	#DIV/0!	#DIV/0!	#DIV/0!	#DIV/0!	#DIV/0!	#DIV/0!	#DIV/0!	#DIV/0!	#DIV/0!	#DIV/0!	#DIV/0!	#DIV/0!	#DIV/0!	#DIV/0!	#DIV/0!	#DIV/0!	#DIV/0!	#DIV/0!	#DIV/0!	#DIV/0!	#DIV/0!	#DIV/0!	#DIV/0!	#DIV/0!	#DIV/0!	#DIV/0!	#DIV/0!	#DIV/0!
212	CTX	VIS	VISli5	312782590	Laterointermediate area, layer 5	#DIV/0!	#DIV/0!	#DIV/0!	#DIV/0!	#DIV/0!	#DIV/0!	#DIV/0!	#DIV/0!	#DIV/0!	#DIV/0!	#DIV/0!	#DIV/0!	#DIV/0!	#DIV/0!	#DIV/0!	#DIV/0!	#DIV/0!	#DIV/0!	#DIV/0!	#DIV/0!	#DIV/0!	#DIV/0!	#DIV/0!	#DIV/0!	#DIV/0!	#DIV/0!	#DIV/0!	#DIV/0!
213	CTX	VIS	VISli6a	312782594	Laterointermediate area, layer 6a	#DIV/0!	#DIV/0!	#DIV/0!	#DIV/0!	#DIV/0!	#DIV/0!	#DIV/0!	#DIV/0!	#DIV/0!	#DIV/0!	#DIV/0!	#DIV/0!	#DIV/0!	#DIV/0!	#DIV/0!	#DIV/0!	#DIV/0!	#DIV/0!	#DIV/0!	#DIV/0!	#DIV/0!	#DIV/0!	#DIV/0!	#DIV/0!	#DIV/0!	#DIV/0!	#DIV/0!	#DIV/0!
214	CTX	VIS	VISli6b	312782598	Laterointermediate area, layer 6b	#DIV/0!	#DIV/0!	#DIV/0!	#DIV/0!	#DIV/0!	#DIV/0!	#DIV/0!	#DIV/0!	#DIV/0!	#DIV/0!	#DIV/0!	#DIV/0!	#DIV/0!	#DIV/0!	#DIV/0!	#DIV/0!	#DIV/0!	#DIV/0!	#DIV/0!	#DIV/0!	#DIV/0!	#DIV/0!	#DIV/0!	#DIV/0!	#DIV/0!	#DIV/0!	#DIV/0!	#DIV/0!
215	CTX	VIS	VISpor	312782628	Postrhinal area	#DIV/0!	#DIV/0!	#DIV/0!	#DIV/0!	#DIV/0!	#DIV/0!	#DIV/0!	#DIV/0!	#DIV/0!	#DIV/0!	#DIV/0!	#DIV/0!	#DIV/0!	#DIV/0!	#DIV/0!	#DIV/0!	#DIV/0!	#DIV/0!	#DIV/0!	#DIV/0!	#DIV/0!	#DIV/0!	#DIV/0!	#DIV/0!	#DIV/0!	#DIV/0!	#DIV/0!	#DIV/0!
216	CTX	VIS	VISpor1	312782632	Postrhinal area, layer 1	#DIV/0!	#DIV/0!	#DIV/0!	#DIV/0!	#DIV/0!	#DIV/0!	#DIV/0!	#DIV/0!	#DIV/0!	#DIV/0!	#DIV/0!	#DIV/0!	#DIV/0!	#DIV/0!	#DIV/0!	#DIV/0!	#DIV/0!	#DIV/0!	#DIV/0!	#DIV/0!	#DIV/0!	#DIV/0!	#DIV/0!	#DIV/0!	#DIV/0!	#DIV/0!	#DIV/0!	#DIV/0!
217	CTX	VIS	VISpor2/3	312782636	Postrhinal area, layer 2/3	#DIV/0!	#DIV/0!	#DIV/0!	#DIV/0!	#DIV/0!	#DIV/0!	#DIV/0!	#DIV/0!	#DIV/0!	#DIV/0!	#DIV/0!	#DIV/0!	#DIV/0!	#DIV/0!	#DIV/0!	#DIV/0!	#DIV/0!	#DIV/0!	#DIV/0!	#DIV/0!	#DIV/0!	#DIV/0!	#DIV/0!	#DIV/0!	#DIV/0!	#DIV/0!	#DIV/0!	#DIV/0!
218	CTX	VIS	VISpor4	312782640	Postrhinal area, layer 4	#DIV/0!	#DIV/0!	#DIV/0!	#DIV/0!	#DIV/0!	#DIV/0!	#DIV/0!	#DIV/0!	#DIV/0!	#DIV/0!	#DIV/0!	#DIV/0!	#DIV/0!	#DIV/0!	#DIV/0!	#DIV/0!	#DIV/0!	#DIV/0!	#DIV/0!	#DIV/0!	#DIV/0!	#DIV/0!	#DIV/0!	#DIV/0!	#DIV/0!	#DIV/0!	#DIV/0!	#DIV/0!
219	CTX	VIS	VISpor5	312782644	Postrhinal area, layer 5	#DIV/0!	#DIV/0!	#DIV/0!	#DIV/0!	#DIV/0!	#DIV/0!	#DIV/0!	#DIV/0!	#DIV/0!	#DIV/0!	#DIV/0!	#DIV/0!	#DIV/0!	#DIV/0!	#DIV/0!	#DIV/0!	#DIV/0!	#DIV/0!	#DIV/0!	#DIV/0!	#DIV/0!	#DIV/0!	#DIV/0!	#DIV/0!	#DIV/0!	#DIV/0!	#DIV/0!	#DIV/0!
220	CTX	VIS	VISpor6a	312782648	Postrhinal area, layer 6a	#DIV/0!	#DIV/0!	#DIV/0!	#DIV/0!	#DIV/0!	#DIV/0!	#DIV/0!	#DIV/0!	#DIV/0!	#DIV/0!	#DIV/0!	#DIV/0!	#DIV/0!	#DIV/0!	#DIV/0!	#DIV/0!	#DIV/0!	#DIV/0!	#DIV/0!	#DIV/0!	#DIV/0!	#DIV/0!	#DIV/0!	#DIV/0!	#DIV/0!	#DIV/0!	#DIV/0!	#DIV/0!
221	CTX	VIS	VISpor6b	312782652	Postrhinal area, layer 6b	#DIV/0!	#DIV/0!	#DIV/0!	#DIV/0!	#DIV/0!	#DIV/0!	#DIV/0!	#DIV/0!	#DIV/0!	#DIV/0!	#DIV/0!	#DIV/0!	#DIV/0!	#DIV/0!	#DIV/0!	#DIV/0!	#DIV/0!	#DIV/0!	#DIV/0!	#DIV/0!	#DIV/0!	#DIV/0!	#DIV/0!	#DIV/0!	#DIV/0!	#DIV/0!	#DIV/0!	#DIV/0!
222	CTX	ACA	ACA	31	Anterior cingulate area	#DIV/0!	#DIV/0!	#DIV/0!	#DIV/0!	#DIV/0!	#DIV/0!	#DIV/0!	#DIV/0!	#DIV/0!	#DIV/0!	#DIV/0!	#DIV/0!	#DIV/0!	#DIV/0!	#DIV/0!	#DIV/0!	#DIV/0!	#DIV/0!	#DIV/0!	#DIV/0!	#DIV/0!	#DIV/0!	#DIV/0!	#DIV/0!	#DIV/0!	#DIV/0!	#DIV/0!	#DIV/0!
223	CTX	ACA	ACA1	572	Anterior cingulate area, layer 1	#DIV/0!	#DIV/0!	#DIV/0!	#DIV/0!	#DIV/0!	#DIV/0!	#DIV/0!	#DIV/0!	#DIV/0!	#DIV/0!	#DIV/0!	#DIV/0!	#DIV/0!	#DIV/0!	#DIV/0!	#DIV/0!	#DIV/0!	#DIV/0!	#DIV/0!	#DIV/0!	#DIV/0!	#DIV/0!	#DIV/0!	#DIV/0!	#DIV/0!	#DIV/0!	#DIV/0!	#DIV/0!
224	CTX	ACA	ACA2/3	1053	Anterior cingulate area, layer 2/3	#DIV/0!	#DIV/0!	#DIV/0!	#DIV/0!	#DIV/0!	#DIV/0!	#DIV/0!	#DIV/0!	#DIV/0!	#DIV/0!	#DIV/0!	#DIV/0!	#DIV/0!	#DIV/0!	#DIV/0!	#DIV/0!	#DIV/0!	#DIV/0!	#DIV/0!	#DIV/0!	#DIV/0!	#DIV/0!	#DIV/0!	#DIV/0!	#DIV/0!	#DIV/0!	#DIV/0!	#DIV/0!
225	CTX	ACA	ACA5	739	Anterior cingulate area, layer 5	#DIV/0!	#DIV/0!	#DIV/0!	#DIV/0!	#DIV/0!	#DIV/0!	#DIV/0!	#DIV/0!	#DIV/0!	#DIV/0!	#DIV/0!	#DIV/0!	#DIV/0!	#DIV/0!	#DIV/0!	#DIV/0!	#DIV/0!	#DIV/0!	#DIV/0!	#DIV/0!	#DIV/0!	#DIV/0!	#DIV/0!	#DIV/0!	#DIV/0!	#DIV/0!	#DIV/0!	#DIV/0!
226	CTX	ACA	ACA6a	179	Anterior cingulate area, layer 6a	#DIV/0!	#DIV/0!	#DIV/0!	#DIV/0!	#DIV/0!	#DIV/0!	#DIV/0!	#DIV/0!	#DIV/0!	#DIV/0!	#DIV/0!	#DIV/0!	#DIV/0!	#DIV/0!	#DIV/0!	#DIV/0!	#DIV/0!	#DIV/0!	#DIV/0!	#DIV/0!	#DIV/0!	#DIV/0!	#DIV/0!	#DIV/0!	#DIV/0!	#DIV/0!	#DIV/0!	#DIV/0!
227	CTX	ACA	ACA6b	227	Anterior cingulate area, layer 6b	#DIV/0!	#DIV/0!	#DIV/0!	#DIV/0!	#DIV/0!	#DIV/0!	#DIV/0!	#DIV/0!	#DIV/0!	#DIV/0!	#DIV/0!	#DIV/0!	#DIV/0!	#DIV/0!	#DIV/0!	#DIV/0!	#DIV/0!	#DIV/0!	#DIV/0!	#DIV/0!	#DIV/0!	#DIV/0!	#DIV/0!	#DIV/0!	#DIV/0!	#DIV/0!	#DIV/0!	#DIV/0!
228	CTX	ACA	ACAd	39	Anterior cingulate area, dorsal part	#DIV/0!	#DIV/0!	#DIV/0!	#DIV/0!	#DIV/0!	#DIV/0!	#DIV/0!	#DIV/0!	#DIV/0!	#DIV/0!	#DIV/0!	#DIV/0!	#DIV/0!	#DIV/0!	#DIV/0!	#DIV/0!	#DIV/0!	#DIV/0!	#DIV/0!	#DIV/0!	#DIV/0!	#DIV/0!	#DIV/0!	#DIV/0!	#DIV/0!	#DIV/0!	#DIV/0!	#DIV/0!
229	CTX	ACA	ACAd1	935	Anterior cingulate area, dorsal part, layer 1	0.0227513	#DIV/0!	#DIV/0!	#DIV/0!	#DIV/0!	#DIV/0!	#DIV/0!	#DIV/0!	#DIV/0!	#DIV/0!	#DIV/0!	#DIV/0!	#DIV/0!	#DIV/0!	#DIV/0!	#DIV/0!	#DIV/0!	#DIV/0!	#DIV/0!	#DIV/0!	#DIV/0!	#DIV/0!	0.0234187	#DIV/0!	#DIV/0!	#DIV/0!	#DIV/0!	#DIV/0!
230	CTX	ACA	ACAd2/3	211	Anterior cingulate area, dorsal part, layer 2/3	0.0314944	0.00495548	#DIV/0!	0.0337748	#DIV/0!	0.0576822	#DIV/0!	#DIV/0!	#DIV/0!	#DIV/0!	#DIV/0!	#DIV/0!	#DIV/0!	#DIV/0!	#DIV/0!	#DIV/0!	#DIV/0!	#DIV/0!	#DIV/0!	#DIV/0!	#DIV/0!	#DIV/0!	0.0418566	0.0135026	#DIV/0!	#DIV/0!	#DIV/0!	#DIV/0!
231	CTX	ACA	ACAd5	1015	Anterior cingulate area, dorsal part, layer 5	0.0384477	0.0372174	0.039138	0.044463	0.0717585	0.0759052	0.0849346	0.0792378	0.110623	0.121788	0.0955885	0.0938432	0.00021561	0.00180024	0.000377086	0.000491338	0.0161067	0.0270334	0.0194416	0.0194535	#DIV/0!	0.0367155	0.0359433	0.0312635	0.0404007	0.048138	0.0489148	0.0377313
232	CTX	ACA	ACAd6a	919	Anterior cingulate area, dorsal part, layer 6a	0.0664995	0.0501876	0.0568785	0.0597537	0.0801779	0.0837781	0.0879073	0.0842101	0.110549	0.129246	0.103491	0.0890139	0.000719583	0.00148371	0.00369066	0.0012769	0.0248299	0.0288239	0.0237285	0.0211747	0.0331578	0.03816	0.0373038	0.0358181	0.0475825	0.0543828	0.0410753	0.0368819
233	CTX	ACA	ACAd6b	927	Anterior cingulate area, dorsal part, layer 6b	#DIV/0!	0.0562622	0.0359061	0.0618178	0.0719617	0.0746965	0.0401356	0.0707448	0.0547816	0.0837413	0.098905	0.12662	0.00707256	0.00263812	0.00538649	0.00187122	0.00253928	0.0180963	0.0368461	0.0238647	0.0236332	0.0445011	0.0371175	0.0158539	0.0344149	0.00700379	0.0290897	0.0237411
234	CTX	ACA	ACAv	48	Anterior cingulate area, ventral part	#DIV/0!	#DIV/0!	#DIV/0!	#DIV/0!	#DIV/0!	#DIV/0!	#DIV/0!	#DIV/0!	#DIV/0!	#DIV/0!	#DIV/0!	#DIV/0!	#DIV/0!	#DIV/0!	#DIV/0!	#DIV/0!	#DIV/0!	#DIV/0!	#DIV/0!	#DIV/0!	#DIV/0!	#DIV/0!	#DIV/0!	#DIV/0!	#DIV/0!	#DIV/0!	#DIV/0!	#DIV/0!
235	CTX	ACA	ACAv1	588	Anterior cingulate area, ventral part, layer 1	#DIV/0!	#DIV/0!	#DIV/0!	#DIV/0!	#DIV/0!	#DIV/0!	#DIV/0!	#DIV/0!	#DIV/0!	#DIV/0!	#DIV/0!	#DIV/0!	#DIV/0!	#DIV/0!	#DIV/0!	#DIV/0!	#DIV/0!	#DIV/0!	#DIV/0!	#DIV/0!	#DIV/0!	#DIV/0!	#DIV/0!	#DIV/0!	#DIV/0!	#DIV/0!	#DIV/0!	#DIV/0!
236	CTX	ACA	ACAv2/3	296	Anterior cingulate area, ventral part, layer 2/3	0.0410612	#DIV/0!	#DIV/0!	#DIV/0!	#DIV/0!	#DIV/0!	#DIV/0!	#DIV/0!	#DIV/0!	#DIV/0!	#DIV/0!	#DIV/0!	#DIV/0!	#DIV/0!	#DIV/0!	#DIV/0!	#DIV/0!	#DIV/0!	#DIV/0!	#DIV/0!	#DIV/0!	#DIV/0!	#DIV/0!	#DIV/0!	#DIV/0!	#DIV/0!	#DIV/0!	#DIV/0!
237	CTX	ACA	ACAv5	772	Anterior cingulate area, ventral part, layer 5	0.0658404	0.0666737	0.0491716	0.0596242	0.0997131	0.105354	#DIV/0!	#DIV/0!	0.119825	#DIV/0!	0.106473	0.100993	0.000735862	0.00254495	0.000229098	0.000658168	0.0259061	0.0319634	0.0216244	0.0333948	#DIV/0!	0.0509177	0.0495144	0.0373159	0.0474129	0.0715691	0.0478578	0.0468967
238	CTX	ACA	ACAv6a	810	Anterior cingulate area, ventral part, 6a	0.08047	0.0658389	0.0663115	0.0784625	0.0994374	0.104147	0.115936	0.106903	0.0804092	0.118723	0.116304	0.10463	0.000506666	0.00228981	0.00361108	0.0019285	0.0163429	0.0316779	0.0313252	0.0375503	#DIV/0!	0.0512217	0.0531198	0.0503243	0.0491362	0.066495	0.0570713	0.0597112
239	CTX	ACA	ACAv6b	819	Anterior cingulate area, ventral part, 6b	0.0225117	0.082447	0.054935	0.072451	0.102174	0.069155	0.110965	0.0447195	0.0560532	0.0840127	0.0979329	0.0955738	0.000924396	0.00431724	0.00408228	0.00548815	0.0101352	0.0364678	0.0237855	0.0302976	#DIV/0!	0.0143583	0.0464781	0.0375973	0.0362159	0.0509986	0.0442882	0.0402501
240	CTX	PL	PL	972	Prelimbic area	#DIV/0!	#DIV/0!	#DIV/0!	#DIV/0!	#DIV/0!	#DIV/0!	#DIV/0!	#DIV/0!	#DIV/0!	#DIV/0!	#DIV/0!	#DIV/0!	#DIV/0!	#DIV/0!	#DIV/0!	#DIV/0!	#DIV/0!	#DIV/0!	#DIV/0!	#DIV/0!	#DIV/0!	#DIV/0!	#DIV/0!	#DIV/0!	#DIV/0!	#DIV/0!	#DIV/0!	#DIV/0!
241	CTX	PL	PL1	171	Prelimbic area, layer 1	0.00864219	0.007148	0.00299475	0.00156917	0.0101375	0.0181565	0.0225733	0.0126978	0.0434023	0.0803809	0.0503759	0.0687736	#DIV/0!	0.000260914	#DIV/0!	#DIV/0!	0.00278818	0.00481223	0.00831892	0.00549105	#DIV/0!	0.00334633	0.00394388	0.00324537	0.00627406	0.00943614	0.00938613	0.00449123
242	CTX	PL	PL2	195	Prelimbic area, layer 2	#DIV/0!	#DIV/0!	#DIV/0!	#DIV/0!	#DIV/0!	#DIV/0!	#DIV/0!	#DIV/0!	#DIV/0!	#DIV/0!	#DIV/0!	#DIV/0!	#DIV/0!	#DIV/0!	#DIV/0!	#DIV/0!	#DIV/0!	#DIV/0!	#DIV/0!	#DIV/0!	#DIV/0!	#DIV/0!	#DIV/0!	#DIV/0!	#DIV/0!	#DIV/0!	#DIV/0!	#DIV/0!
243	CTX	PL	PL2/3	304	Prelimbic area, layer 2/3	0.0225928	0.0281131	0.0254262	0.0252856	0.02801	0.0686553	0.078868	0.0737084	0.0959028	0.120311	0.100967	0.0786741	#DIV/0!	0.000215901	#DIV/0!	#DIV/0!	0.0120393	0.0125955	0.0129347	0.00626553	#DIV/0!	0.0317729	0.0194214	0.0311976	0.0354976	0.0415709	0.0198593	0.0190343
244	CTX	PL	PL5	363	Prelimbic area, layer 5	0.0377293	0.0429297	0.0332453	0.0413098	0.0585855	0.057601	0.0938778	0.0810581	0.100292	0.100789	0.0819746	0.100104	0.000145649	0.00107356	0.000241839	0.000395058	0.0183788	0.02756	0.0212966	0.0180449	#DIV/0!	0.0329134	0.030039	0.0333844	0.0408555	0.0410296	0.0432003	0.0337762
245	CTX	PL	PL6a	84	Prelimbic area, layer 6a	0.0616848	0.0621235	0.0366718	0.0626927	0.0888453	0.0815234	0.0830323	0.071823	0.111531	0.118048	0.0942737	0.106392	0.000596891	0.00258031	0.00168933	0.00119834	0.0254483	0.0255849	0.0271168	0.018132	0.0230896	0.0455146	0.0413216	0.0446509	0.0508949	0.0493397	0.0419237	0.0449905
246	CTX	PL	PL6b	132	Prelimbic area, layer 6b	0.0379736	0.0687406	0.0347826	0.0502458	0.0787288	0.0611512	0.0700406	0.0421773	0.0537914	0.0631461	0.100437	0.0929553	0.00277585	0.00407979	0.00412596	0.000864668	0.0153896	0.0298517	0.0518385	0.0132383	0.000816165	0.0178409	0.0521136	0.0692802	0.0202035	0.0297446	0.0302851	0.0480663
247	CTX	ILA	ILA	44	Infralimbic area	#DIV/0!	#DIV/0!	#DIV/0!	#DIV/0!	#DIV/0!	#DIV/0!	#DIV/0!	#DIV/0!	#DIV/0!	#DIV/0!	#DIV/0!	#DIV/0!	#DIV/0!	#DIV/0!	#DIV/0!	#DIV/0!	#DIV/0!	#DIV/0!	#DIV/0!	#DIV/0!	#DIV/0!	#DIV/0!	#DIV/0!	#DIV/0!	#DIV/0!	#DIV/0!	#DIV/0!	#DIV/0!
248	CTX	ILA	ILA1	707	Infralimbic area, layer 1	0.0277443	#DIV/0!	#DIV/0!	#DIV/0!	#DIV/0!	#DIV/0!	#DIV/0!	#DIV/0!	#DIV/0!	#DIV/0!	#DIV/0!	#DIV/0!	#DIV/0!	#DIV/0!	#DIV/0!	#DIV/0!	#DIV/0!	#DIV/0!	#DIV/0!	#DIV/0!	#DIV/0!	#DIV/0!	#DIV/0!	#DIV/0!	#DIV/0!	#DIV/0!	#DIV/0!	#DIV/0!
249	CTX	ILA	ILA2	747	Infralimbic area, layer 2	#DIV/0!	#DIV/0!	#DIV/0!	#DIV/0!	#DIV/0!	#DIV/0!	#DIV/0!	#DIV/0!	#DIV/0!	#DIV/0!	#DIV/0!	#DIV/0!	#DIV/0!	#DIV/0!	#DIV/0!	#DIV/0!	#DIV/0!	#DIV/0!	#DIV/0!	#DIV/0!	#DIV/0!	#DIV/0!	#DIV/0!	#DIV/0!	#DIV/0!	#DIV/0!	#DIV/0!	#DIV/0!
250	CTX	ILA	ILA2/3	556	Infralimbic area, layer 2/3	0.0301384	#DIV/0!	#DIV/0!	#DIV/0!	#DIV/0!	#DIV/0!	#DIV/0!	#DIV/0!	#DIV/0!	#DIV/0!	#DIV/0!	#DIV/0!	#DIV/0!	#DIV/0!	#DIV/0!	#DIV/0!	#DIV/0!	#DIV/0!	#DIV/0!	#DIV/0!	#DIV/0!	#DIV/0!	0.00326009	#DIV/0!	#DIV/0!	#DIV/0!	#DIV/0!	#DIV/0!
251	CTX	ILA	ILA5	827	Infralimbic area, layer 5	0.0525742	0.0773581	0.0308809	0.0730763	#DIV/0!	0.0824168	#DIV/0!	#DIV/0!	#DIV/0!	#DIV/0!	0.0951593	0.107835	0.000180405	0.00278147	#DIV/0!	0.00084979	0.0248435	0.027926	#DIV/0!	0.0216983	#DIV/0!	#DIV/0!	0.0125352	0.0338961	0.0310686	0.0585445	0.0513768	0.0325937
252	CTX	ILA	ILA6a	1054	Infralimbic area, layer 6a	0.0470084	0.0638365	0.0356313	0.0879469	0.101768	0.0823027	0.0743168	0.0799735	0.120806	0.111588	0.101555	0.112004	0.000301619	0.00236238	0.00152811	0.00213059	0.0217797	0.0282087	0.0398966	0.0238505	0.094109	0.052888	0.0417276	0.0432554	0.0291944	0.0476594	0.0335482	0.0521201
253	CTX	ILA	ILA6b	1081	Infralimbic area, layer 6b	#DIV/0!	0.0212227	0.0380193	0.0195041	0.0656739	0.0602794	0.0322029	#DIV/0!	0.114246	0.0520738	0.111579	0.0682192	#DIV/0!	0.00292287	0.0011905	#DIV/0!	0.00748112	0.0436659	0.0137591	0.0175299	#DIV/0!	0.00861124	0.0484719	0.0821522	0.0168263	0.0488485	0.071878	0.0474677
254	CTX	ORB	ORB	714	Orbital area	#DIV/0!	#DIV/0!	#DIV/0!	#DIV/0!	#DIV/0!	#DIV/0!	#DIV/0!	#DIV/0!	#DIV/0!	#DIV/0!	#DIV/0!	#DIV/0!	#DIV/0!	#DIV/0!	#DIV/0!	#DIV/0!	#DIV/0!	#DIV/0!	#DIV/0!	#DIV/0!	#DIV/0!	#DIV/0!	#DIV/0!	#DIV/0!	#DIV/0!	#DIV/0!	#DIV/0!	#DIV/0!
255	CTX	ORB	ORB1	264	Orbital area, layer 1	#DIV/0!	#DIV/0!	#DIV/0!	#DIV/0!	#DIV/0!	#DIV/0!	#DIV/0!	#DIV/0!	#DIV/0!	#DIV/0!	#DIV/0!	#DIV/0!	#DIV/0!	#DIV/0!	#DIV/0!	#DIV/0!	#DIV/0!	#DIV/0!	#DIV/0!	#DIV/0!	#DIV/0!	#DIV/0!	#DIV/0!	#DIV/0!	#DIV/0!	#DIV/0!	#DIV/0!	#DIV/0!
256	CTX	ORB	ORB2/3	492	Orbital area, layer 2/3	#DIV/0!	#DIV/0!	#DIV/0!	#DIV/0!	#DIV/0!	#DIV/0!	#DIV/0!	#DIV/0!	#DIV/0!	#DIV/0!	#DIV/0!	#DIV/0!	#DIV/0!	#DIV/0!	#DIV/0!	#DIV/0!	#DIV/0!	#DIV/0!	#DIV/0!	#DIV/0!	#DIV/0!	#DIV/0!	#DIV/0!	#DIV/0!	#DIV/0!	#DIV/0!	#DIV/0!	#DIV/0!
257	CTX	ORB	ORB5	352	Orbital area, layer 5	#DIV/0!	#DIV/0!	#DIV/0!	#DIV/0!	#DIV/0!	#DIV/0!	#DIV/0!	#DIV/0!	#DIV/0!	#DIV/0!	#DIV/0!	#DIV/0!	#DIV/0!	#DIV/0!	#DIV/0!	#DIV/0!	#DIV/0!	#DIV/0!	#DIV/0!	#DIV/0!	#DIV/0!	#DIV/0!	#DIV/0!	#DIV/0!	#DIV/0!	#DIV/0!	#DIV/0!	#DIV/0!
258	CTX	ORB	ORB6a	476	Orbital area, layer 6a	#DIV/0!	#DIV/0!	#DIV/0!	#DIV/0!	#DIV/0!	#DIV/0!	#DIV/0!	#DIV/0!	#DIV/0!	#DIV/0!	#DIV/0!	#DIV/0!	#DIV/0!	#DIV/0!	#DIV/0!	#DIV/0!	#DIV/0!	#DIV/0!	#DIV/0!	#DIV/0!	#DIV/0!	#DIV/0!	#DIV/0!	#DIV/0!	#DIV/0!	#DIV/0!	#DIV/0!	#DIV/0!
259	CTX	ORB	ORB6b	516	Orbital area, layer 6b	#DIV/0!	#DIV/0!	#DIV/0!	#DIV/0!	#DIV/0!	#DIV/0!	#DIV/0!	#DIV/0!	#DIV/0!	#DIV/0!	#DIV/0!	#DIV/0!	#DIV/0!	#DIV/0!	#DIV/0!	#DIV/0!	#DIV/0!	#DIV/0!	#DIV/0!	#DIV/0!	#DIV/0!	#DIV/0!	#DIV/0!	#DIV/0!	#DIV/0!	#DIV/0!	#DIV/0!	#DIV/0!
260	CTX	ORB	ORBl	723	Orbital area, lateral part	#DIV/0!	#DIV/0!	#DIV/0!	#DIV/0!	#DIV/0!	#DIV/0!	#DIV/0!	#DIV/0!	#DIV/0!	#DIV/0!	#DIV/0!	#DIV/0!	#DIV/0!	#DIV/0!	#DIV/0!	#DIV/0!	#DIV/0!	#DIV/0!	#DIV/0!	#DIV/0!	#DIV/0!	#DIV/0!	#DIV/0!	#DIV/0!	#DIV/0!	#DIV/0!	#DIV/0!	#DIV/0!
261	CTX	ORB	ORBl1	448	Orbital area, lateral part, layer 1	0.0174072	0.00820502	0.00643572	0.00728174	0.0350608	#DIV/0!	0.0623076	0.0200561	0.0623723	#DIV/0!	0.105486	0.0555647	#DIV/0!	0.000160926	#DIV/0!	#DIV/0!	0.00719856	0.00292013	0.00249965	#DIV/0!	0.00640388	0.0112217	#DIV/0!	0.00598551	0.0155366	0.00936025	0.0134901	0.0157236
262	CTX	ORB	ORBl2/3	412	Orbital area, lateral part, layer 2/3	0.0336399	0.0464221	0.0267983	0.0428971	0.0808369	0.0868569	0.0840638	0.0592729	0.0671688	#DIV/0!	0.117011	0.0930379	#DIV/0!	0.000208134	0.000381283	#DIV/0!	0.00260639	0.0125132	0.0106446	0.00400335	0.0117404	0.0160644	0.0145683	0.0197435	0.0241479	0.0334633	0.0151515	0.0289669
263	CTX	ORB	ORBl5	630	Orbital area, lateral part, layer 5	0.036469	0.0660259	0.0461028	0.064208	0.0810172	0.0893723	0.0884438	0.0683851	0.274316	#DIV/0!	0.132199	0.100226	#DIV/0!	#DIV/0!	0.000814875	#DIV/0!	0.0087088	0.00878283	0.0124275	0.00717466	0.0168261	0.0257874	0.0208193	0.0324364	0.0436782	0.0503085	0.0223222	0.0478948
264	CTX	ORB	ORBl6a	440	Orbital area, lateral part, layer 6a	0.0305992	0.0746987	0.056869	0.0810699	0.083314	#DIV/0!	0.0954397	0.0745251	0.773856	#DIV/0!	0.0893199	0.0963308	#DIV/0!	#DIV/0!	0.00114935	#DIV/0!	0.0249211	0.0203762	0.00606572	0.0171458	0.0217536	0.0296619	#DIV/0!	0.0232513	0.0617119	0.0325473	0.026676	0.0416699
265	CTX	ORB	ORBl6b	488	Orbital area, lateral part, layer 6b	0.0181146	0.0161646	0.0270749	0.0334619	0.0488207	#DIV/0!	0.0432793	0.0402148	#DIV/0!	#DIV/0!	0.0380512	0.0865345	#DIV/0!	0.00204431	#DIV/0!	#DIV/0!	0.00955601	0.0127127	0.00854958	0.00598617	0.018135	0.0171792	#DIV/0!	0.00731372	0.014638	0.0100618	#DIV/0!	0.021027
266	CTX	ORB	ORBm	731	Orbital area, medial part	#DIV/0!	#DIV/0!	#DIV/0!	#DIV/0!	#DIV/0!	#DIV/0!	#DIV/0!	#DIV/0!	#DIV/0!	#DIV/0!	#DIV/0!	#DIV/0!	#DIV/0!	#DIV/0!	#DIV/0!	#DIV/0!	#DIV/0!	#DIV/0!	#DIV/0!	#DIV/0!	#DIV/0!	#DIV/0!	#DIV/0!	#DIV/0!	#DIV/0!	#DIV/0!	#DIV/0!	#DIV/0!
267	CTX	ORB	ORBm1	484	Orbital area, medial part, layer 1	0.0154842	#DIV/0!	#DIV/0!	0.0115206	#DIV/0!	0.0108312	#DIV/0!	#DIV/0!	#DIV/0!	#DIV/0!	#DIV/0!	#DIV/0!	#DIV/0!	#DIV/0!	#DIV/0!	#DIV/0!	#DIV/0!	#DIV/0!	#DIV/0!	0.00703584	#DIV/0!	#DIV/0!	0.0113595	0.0030151	#DIV/0!	0.0136298	0.0355601	#DIV/0!
268	CTX	ORB	ORBm2	524	Orbital area, medial part, layer 2	#DIV/0!	#DIV/0!	#DIV/0!	#DIV/0!	#DIV/0!	#DIV/0!	#DIV/0!	#DIV/0!	#DIV/0!	#DIV/0!	#DIV/0!	#DIV/0!	#DIV/0!	#DIV/0!	#DIV/0!	#DIV/0!	#DIV/0!	#DIV/0!	#DIV/0!	#DIV/0!	#DIV/0!	#DIV/0!	#DIV/0!	#DIV/0!	#DIV/0!	#DIV/0!	#DIV/0!	#DIV/0!
269	CTX	ORB	ORBm2/3	582	Orbital area, medial part, layer 2/3	0.0215909	0.0459773	0.0208123	0.0435837	0.0577519	0.0732786	0.0345904	0.0742278	0.0916745	0.129366	0.159557	0.0601742	#DIV/0!	0.00230501	#DIV/0!	#DIV/0!	0.00530625	0.0158246	0.0343098	0.0156005	#DIV/0!	#DIV/0!	0.097083	0.0187959	0.0267553	0.0536789	0.0376431	0.0299352
270	CTX	ORB	ORBm5	620	Orbital area, medial part, layer 5	0.0368259	0.0426148	0.0390708	0.0446017	0.0780563	0.0745615	0.090034	0.0899278	0.0972756	0.136658	0.0876589	0.103265	6.48064e-05	0.00123748	#DIV/0!	0.00040913	0.0175994	0.0204898	0.0214677	0.0160578	#DIV/0!	0.0254509	0.0269276	0.0380538	0.0367195	0.0459367	0.0365225	0.0364515
271	CTX	ORB	ORBm6a	910	Orbital area, medial part, layer 6a	0.0400356	0.0517125	0.0327813	0.0807349	0.0758447	0.0714019	0.0933306	0.0993644	0.10942	0.109988	0.0993495	0.108504	0.000685006	0.000847362	0.00121155	0.000937006	0.0147216	0.015521	0.026103	0.0219274	0.0267824	0.0324023	0.0317599	0.0475013	0.0511261	0.0399093	0.0403556	0.0365124
272	CTX	ORB	ORBm6b	527696977	Orbital area, medial part, layer 6b	#DIV/0!	0.0317601	0.018226	0.106385	0.058685	0.0184947	0.055778	0.0625176	0.117635	0.0321194	0.0764343	0.0410761	#DIV/0!	#DIV/0!	#DIV/0!	#DIV/0!	8.55359e-05	0.00539743	0.0203406	0.0126009	#DIV/0!	#DIV/0!	0.0152784	#DIV/0!	0.0130094	0.0141803	0.0181021	0.00954628
273	CTX	ORB	ORBv	738	Orbital area, ventral part	#DIV/0!	#DIV/0!	#DIV/0!	#DIV/0!	#DIV/0!	#DIV/0!	#DIV/0!	#DIV/0!	#DIV/0!	#DIV/0!	#DIV/0!	#DIV/0!	#DIV/0!	#DIV/0!	#DIV/0!	#DIV/0!	#DIV/0!	#DIV/0!	#DIV/0!	#DIV/0!	#DIV/0!	#DIV/0!	#DIV/0!	#DIV/0!	#DIV/0!	#DIV/0!	#DIV/0!	#DIV/0!
274	CTX	ORB	ORBvl	746	Orbital area, ventrolateral part	#DIV/0!	#DIV/0!	#DIV/0!	#DIV/0!	#DIV/0!	#DIV/0!	#DIV/0!	#DIV/0!	#DIV/0!	#DIV/0!	#DIV/0!	#DIV/0!	#DIV/0!	#DIV/0!	#DIV/0!	#DIV/0!	#DIV/0!	#DIV/0!	#DIV/0!	#DIV/0!	#DIV/0!	#DIV/0!	#DIV/0!	#DIV/0!	#DIV/0!	#DIV/0!	#DIV/0!	#DIV/0!
275	CTX	ORB	ORBvl1	969	Orbital area, ventrolateral part, layer 1	0.00737182	0.0129547	0.00842864	0.0133924	0.0400558	0.0366044	0.03527	0.0319557	0.109972	0.108989	0.0486507	0.0649689	0.000420868	0.000161794	0.000235991	5.17732e-05	0.00237633	0.00853423	0.00195729	0.00374588	0.00327917	0.0105679	0.0074816	0.00390458	0.0121562	0.0189254	0.00922224	0.0100801
276	CTX	ORB	ORBvl2/3	288	Orbital area, ventrolateral part, layer 2/3	0.0253311	0.0375694	0.0301312	0.0342722	0.0742258	0.076981	0.0879285	0.0705758	0.119166	0.137356	0.0971224	0.100187	8.22764e-05	0.000903016	0.0001361	0.000115061	0.00794456	0.0180091	0.0125859	0.0102736	0.0146011	0.0282644	0.018291	0.0182725	0.0340377	0.0313434	0.0272239	0.0296157
277	CTX	ORB	ORBvl5	1125	Orbital area, ventrolateral part, layer 5	0.0272057	0.0442849	0.0365673	0.0453269	0.0788309	0.0771325	0.0860372	0.0746964	0.12039	0.129529	0.103397	0.110459	0.000188906	0.00108452	0.000404339	0.000108924	0.0124901	0.0178988	0.0166103	0.0151755	0.0274225	0.0309186	0.02261	0.0274207	0.0421284	0.0402795	0.036125	0.0372237
278	CTX	ORB	ORBvl6a	608	Orbital area, ventrolateral part, layer 6a	0.0388085	0.0555214	0.0494727	0.0635997	0.0815886	0.089261	0.0761266	0.0727908	0.11928	0.115103	0.0646495	0.0845167	0.00014613	0.00160942	0.000304766	0.00109814	0.0152563	0.0227646	0.0140959	0.0164052	0.0140434	0.0383108	0.0162317	0.0412782	0.0491197	0.037786	0.037211	0.0465919
279	CTX	ORB	ORBvl6b	680	Orbital area, ventrolateral part, layer 6b	0.0331141	0.0573205	0.0326337	0.0523119	0.0790927	0.0234594	0.0611073	0.0752742	0.0908958	#DIV/0!	0.0471198	0.0593096	#DIV/0!	#DIV/0!	#DIV/0!	#DIV/0!	0.00482669	0.0248905	0.00185732	0.010657	0.0228805	#DIV/0!	0.0146735	0.021141	0.0295364	0.00867866	0.00796906	0.0233315
280	CTX	AI	AI	95	Agranular insular area	#DIV/0!	#DIV/0!	#DIV/0!	#DIV/0!	#DIV/0!	#DIV/0!	#DIV/0!	#DIV/0!	#DIV/0!	#DIV/0!	#DIV/0!	#DIV/0!	#DIV/0!	#DIV/0!	#DIV/0!	#DIV/0!	#DIV/0!	#DIV/0!	#DIV/0!	#DIV/0!	#DIV/0!	#DIV/0!	#DIV/0!	#DIV/0!	#DIV/0!	#DIV/0!	#DIV/0!	#DIV/0!
281	CTX	AI	AId	104	Agranular insular area, dorsal part	#DIV/0!	#DIV/0!	#DIV/0!	#DIV/0!	#DIV/0!	#DIV/0!	#DIV/0!	#DIV/0!	#DIV/0!	#DIV/0!	#DIV/0!	#DIV/0!	#DIV/0!	#DIV/0!	#DIV/0!	#DIV/0!	#DIV/0!	#DIV/0!	#DIV/0!	#DIV/0!	#DIV/0!	#DIV/0!	#DIV/0!	#DIV/0!	#DIV/0!	#DIV/0!	#DIV/0!	#DIV/0!
282	CTX	AI	AId1	996	Agranular insular area, dorsal part, layer 1	#DIV/0!	#DIV/0!	#DIV/0!	#DIV/0!	#DIV/0!	#DIV/0!	#DIV/0!	#DIV/0!	#DIV/0!	#DIV/0!	#DIV/0!	#DIV/0!	#DIV/0!	#DIV/0!	#DIV/0!	#DIV/0!	#DIV/0!	#DIV/0!	#DIV/0!	#DIV/0!	#DIV/0!	#DIV/0!	#DIV/0!	#DIV/0!	#DIV/0!	#DIV/0!	#DIV/0!	#DIV/0!
283	CTX	AI	AId2/3	328	Agranular insular area, dorsal part, layer 2/3	#DIV/0!	#DIV/0!	#DIV/0!	#DIV/0!	#DIV/0!	#DIV/0!	#DIV/0!	#DIV/0!	#DIV/0!	#DIV/0!	#DIV/0!	#DIV/0!	#DIV/0!	#DIV/0!	#DIV/0!	#DIV/0!	#DIV/0!	#DIV/0!	#DIV/0!	#DIV/0!	#DIV/0!	#DIV/0!	#DIV/0!	#DIV/0!	#DIV/0!	#DIV/0!	#DIV/0!	#DIV/0!
284	CTX	AI	AId5	1101	Agranular insular area, dorsal part, layer 5	#DIV/0!	#DIV/0!	#DIV/0!	#DIV/0!	#DIV/0!	#DIV/0!	#DIV/0!	#DIV/0!	#DIV/0!	#DIV/0!	#DIV/0!	#DIV/0!	#DIV/0!	#DIV/0!	#DIV/0!	#DIV/0!	#DIV/0!	#DIV/0!	#DIV/0!	#DIV/0!	#DIV/0!	#DIV/0!	#DIV/0!	#DIV/0!	#DIV/0!	#DIV/0!	#DIV/0!	#DIV/0!
285	CTX	AI	AId6a	783	Agranular insular area, dorsal part, layer 6a	#DIV/0!	#DIV/0!	#DIV/0!	#DIV/0!	#DIV/0!	#DIV/0!	#DIV/0!	#DIV/0!	#DIV/0!	#DIV/0!	#DIV/0!	#DIV/0!	#DIV/0!	#DIV/0!	#DIV/0!	#DIV/0!	#DIV/0!	#DIV/0!	#DIV/0!	#DIV/0!	0.0149197	#DIV/0!	#DIV/0!	#DIV/0!	#DIV/0!	#DIV/0!	#DIV/0!	#DIV/0!
286	CTX	AI	AId6b	831	Agranular insular area, dorsal part, layer 6b	#DIV/0!	#DIV/0!	#DIV/0!	#DIV/0!	#DIV/0!	#DIV/0!	#DIV/0!	#DIV/0!	#DIV/0!	#DIV/0!	#DIV/0!	#DIV/0!	#DIV/0!	#DIV/0!	#DIV/0!	#DIV/0!	#DIV/0!	#DIV/0!	#DIV/0!	#DIV/0!	0.0176737	#DIV/0!	#DIV/0!	#DIV/0!	#DIV/0!	#DIV/0!	#DIV/0!	#DIV/0!
287	CTX	AI	AIp	111	Agranular insular area, posterior part	#DIV/0!	#DIV/0!	#DIV/0!	#DIV/0!	#DIV/0!	#DIV/0!	#DIV/0!	#DIV/0!	#DIV/0!	#DIV/0!	#DIV/0!	#DIV/0!	#DIV/0!	#DIV/0!	#DIV/0!	#DIV/0!	#DIV/0!	#DIV/0!	#DIV/0!	#DIV/0!	#DIV/0!	#DIV/0!	#DIV/0!	#DIV/0!	#DIV/0!	#DIV/0!	#DIV/0!	#DIV/0!
288	CTX	AI	AIp1	120	Agranular insular area, posterior part, layer 1	#DIV/0!	#DIV/0!	#DIV/0!	#DIV/0!	#DIV/0!	#DIV/0!	#DIV/0!	#DIV/0!	#DIV/0!	#DIV/0!	#DIV/0!	#DIV/0!	#DIV/0!	#DIV/0!	#DIV/0!	#DIV/0!	#DIV/0!	#DIV/0!	#DIV/0!	#DIV/0!	#DIV/0!	#DIV/0!	#DIV/0!	#DIV/0!	#DIV/0!	#DIV/0!	#DIV/0!	#DIV/0!
289	CTX	AI	AIp2/3	163	Agranular insular area, posterior part, layer 2/3	#DIV/0!	#DIV/0!	#DIV/0!	#DIV/0!	#DIV/0!	#DIV/0!	#DIV/0!	#DIV/0!	#DIV/0!	#DIV/0!	#DIV/0!	#DIV/0!	#DIV/0!	#DIV/0!	#DIV/0!	#DIV/0!	#DIV/0!	#DIV/0!	#DIV/0!	#DIV/0!	#DIV/0!	#DIV/0!	#DIV/0!	#DIV/0!	#DIV/0!	#DIV/0!	#DIV/0!	#DIV/0!
290	CTX	AI	AIp5	344	Agranular insular area, posterior part, layer 5	#DIV/0!	#DIV/0!	#DIV/0!	#DIV/0!	#DIV/0!	#DIV/0!	#DIV/0!	#DIV/0!	#DIV/0!	#DIV/0!	#DIV/0!	#DIV/0!	#DIV/0!	#DIV/0!	#DIV/0!	#DIV/0!	#DIV/0!	#DIV/0!	#DIV/0!	#DIV/0!	#DIV/0!	#DIV/0!	#DIV/0!	#DIV/0!	#DIV/0!	#DIV/0!	#DIV/0!	#DIV/0!
291	CTX	AI	AIp6a	314	Agranular insular area, posterior part, layer 6a	#DIV/0!	#DIV/0!	#DIV/0!	#DIV/0!	#DIV/0!	#DIV/0!	#DIV/0!	#DIV/0!	#DIV/0!	#DIV/0!	#DIV/0!	#DIV/0!	#DIV/0!	#DIV/0!	#DIV/0!	#DIV/0!	#DIV/0!	#DIV/0!	#DIV/0!	#DIV/0!	#DIV/0!	#DIV/0!	#DIV/0!	#DIV/0!	#DIV/0!	#DIV/0!	#DIV/0!	#DIV/0!
292	CTX	AI	AIp6b	355	Agranular insular area, posterior part, layer 6b	#DIV/0!	#DIV/0!	#DIV/0!	#DIV/0!	#DIV/0!	#DIV/0!	#DIV/0!	#DIV/0!	#DIV/0!	#DIV/0!	#DIV/0!	#DIV/0!	#DIV/0!	#DIV/0!	#DIV/0!	#DIV/0!	#DIV/0!	#DIV/0!	#DIV/0!	#DIV/0!	#DIV/0!	#DIV/0!	#DIV/0!	#DIV/0!	#DIV/0!	#DIV/0!	#DIV/0!	#DIV/0!
293	CTX	AI	AIv	119	Agranular insular area, ventral part	#DIV/0!	#DIV/0!	#DIV/0!	#DIV/0!	#DIV/0!	#DIV/0!	#DIV/0!	#DIV/0!	#DIV/0!	#DIV/0!	#DIV/0!	#DIV/0!	#DIV/0!	#DIV/0!	#DIV/0!	#DIV/0!	#DIV/0!	#DIV/0!	#DIV/0!	#DIV/0!	#DIV/0!	#DIV/0!	#DIV/0!	#DIV/0!	#DIV/0!	#DIV/0!	#DIV/0!	#DIV/0!
294	CTX	AI	AIv1	704	Agranular insular area, ventral part, layer 1	#DIV/0!	#DIV/0!	#DIV/0!	#DIV/0!	#DIV/0!	#DIV/0!	#DIV/0!	#DIV/0!	#DIV/0!	#DIV/0!	#DIV/0!	#DIV/0!	#DIV/0!	#DIV/0!	#DIV/0!	#DIV/0!	#DIV/0!	#DIV/0!	#DIV/0!	#DIV/0!	#DIV/0!	#DIV/0!	#DIV/0!	#DIV/0!	#DIV/0!	#DIV/0!	#DIV/0!	#DIV/0!
295	CTX	AI	AIv2/3	694	Agranular insular area, ventral part, layer 2/3	#DIV/0!	#DIV/0!	#DIV/0!	#DIV/0!	#DIV/0!	#DIV/0!	#DIV/0!	#DIV/0!	#DIV/0!	#DIV/0!	#DIV/0!	#DIV/0!	#DIV/0!	#DIV/0!	#DIV/0!	#DIV/0!	#DIV/0!	#DIV/0!	#DIV/0!	#DIV/0!	#DIV/0!	#DIV/0!	#DIV/0!	#DIV/0!	#DIV/0!	#DIV/0!	#DIV/0!	#DIV/0!
296	CTX	AI	AIv5	800	Agranular insular area, ventral part, layer 5	#DIV/0!	#DIV/0!	#DIV/0!	#DIV/0!	#DIV/0!	#DIV/0!	#DIV/0!	#DIV/0!	#DIV/0!	#DIV/0!	#DIV/0!	#DIV/0!	#DIV/0!	#DIV/0!	#DIV/0!	#DIV/0!	#DIV/0!	#DIV/0!	#DIV/0!	#DIV/0!	#DIV/0!	#DIV/0!	#DIV/0!	#DIV/0!	#DIV/0!	#DIV/0!	#DIV/0!	#DIV/0!
297	CTX	AI	AIv6a	675	Agranular insular area, ventral part, layer 6a	#DIV/0!	#DIV/0!	#DIV/0!	#DIV/0!	#DIV/0!	#DIV/0!	#DIV/0!	#DIV/0!	#DIV/0!	#DIV/0!	#DIV/0!	#DIV/0!	#DIV/0!	#DIV/0!	#DIV/0!	#DIV/0!	#DIV/0!	#DIV/0!	#DIV/0!	#DIV/0!	#DIV/0!	#DIV/0!	#DIV/0!	#DIV/0!	#DIV/0!	#DIV/0!	#DIV/0!	#DIV/0!
298	CTX	AI	AIv6b	699	Agranular insular area, ventral part, layer 6b	#DIV/0!	#DIV/0!	#DIV/0!	#DIV/0!	#DIV/0!	#DIV/0!	#DIV/0!	#DIV/0!	#DIV/0!	#DIV/0!	#DIV/0!	#DIV/0!	#DIV/0!	#DIV/0!	#DIV/0!	#DIV/0!	#DIV/0!	#DIV/0!	#DIV/0!	#DIV/0!	#DIV/0!	#DIV/0!	#DIV/0!	#DIV/0!	#DIV/0!	#DIV/0!	#DIV/0!	#DIV/0!
299	CTX	RSP	RSP	254	Retrosplenial area	#DIV/0!	#DIV/0!	#DIV/0!	#DIV/0!	#DIV/0!	#DIV/0!	#DIV/0!	#DIV/0!	#DIV/0!	#DIV/0!	#DIV/0!	#DIV/0!	#DIV/0!	#DIV/0!	#DIV/0!	#DIV/0!	#DIV/0!	#DIV/0!	#DIV/0!	#DIV/0!	#DIV/0!	#DIV/0!	#DIV/0!	#DIV/0!	#DIV/0!	#DIV/0!	#DIV/0!	#DIV/0!
300	CTX	RSP	RSPagl	894	Retrosplenial area, lateral agranular part	#DIV/0!	#DIV/0!	#DIV/0!	#DIV/0!	#DIV/0!	#DIV/0!	#DIV/0!	#DIV/0!	#DIV/0!	#DIV/0!	#DIV/0!	#DIV/0!	#DIV/0!	#DIV/0!	#DIV/0!	#DIV/0!	#DIV/0!	#DIV/0!	#DIV/0!	#DIV/0!	#DIV/0!	#DIV/0!	#DIV/0!	#DIV/0!	#DIV/0!	#DIV/0!	#DIV/0!	#DIV/0!
301	CTX	RSP	RSPagl1	671	Retrosplenial area, lateral agranular part, layer 1	0.0161575	0.0113201	0.011324	0.013988	0.0318048	0.0176069	0.03892	0.027839	0.0677386	0.074561	0.0637666	0.0651111	0.000229087	#DIV/0!	0.000136621	0.000866577	0.00524853	0.00811635	0.00480023	0.00425988	0.00695793	0.00348658	0.00572505	0.00839285	0.00868533	0.0118695	0.0136608	0.0132609
302	CTX	RSP	RSPagl2/3	965	Retrosplenial area, lateral agranular part, layer 2/3	0.0478521	0.0550405	0.0553574	0.0674379	0.0923408	0.074205	0.103156	0.103784	0.122792	0.149165	0.146368	0.133256	0.000615708	0.000295142	0.000499388	0.000443785	0.0136359	0.0288262	0.0174294	0.00812092	0.0145455	0.0254151	0.011123	0.0231909	0.0315773	0.0306046	0.0313146	0.0417882
303	CTX	RSP	RSPagl5	774	Retrosplenial area, lateral agranular part, layer 5	0.0368234	0.0611384	0.0564739	0.0528739	0.0883959	0.13	0.0903149	0.0847107	0.14726	0.145703	0.108231	0.125671	0.000639024	0.000663594	0.000965227	0.000429685	0.0242099	0.0366047	0.0255831	0.0291612	0.0217977	0.0366105	0.0298663	0.0317449	0.0472961	0.0559841	0.0443077	0.0492968
304	CTX	RSP	RSPagl6a	906	Retrosplenial area, lateral agranular part, layer 6a	0.0391221	0.0619023	0.062784	0.0656916	0.0926083	0.140791	0.0927129	0.0572093	1.95195	0.121968	0.102377	0.110538	0.000886562	0.000715484	0.00378511	0.000286095	0.0233617	0.0272224	0.0295721	0.043662	0.037553	0.0409564	0.0367208	0.0337951	0.0514454	0.0522311	0.0391106	0.0443704
305	CTX	RSP	RSPagl6b	279	Retrosplenial area, lateral agranular part, layer 6b	0.0287871	0.0654483	0.0529233	0.0548655	0.0744544	0.111978	0.0651642	0.0282551	0.0675749	0.0208455	0.0832404	0.0947426	0.00209097	#DIV/0!	0.00353081	0.00290249	0.0142894	0.0122768	0.0301468	0.0329959	0.0364406	0.0338901	0.0084406	0.0239811	0.0404157	0.0376126	0.0289354	0.0385197
306	CTX	VIS	VISmma	480149258	Mediomedial anterior visual area	#DIV/0!	#DIV/0!	#DIV/0!	#DIV/0!	#DIV/0!	#DIV/0!	#DIV/0!	#DIV/0!	#DIV/0!	#DIV/0!	#DIV/0!	#DIV/0!	#DIV/0!	#DIV/0!	#DIV/0!	#DIV/0!	#DIV/0!	#DIV/0!	#DIV/0!	#DIV/0!	#DIV/0!	#DIV/0!	#DIV/0!	#DIV/0!	#DIV/0!	#DIV/0!	#DIV/0!	#DIV/0!
307	CTX	VIS	VISmma1	480149262	Mediomedial anterior visual area, layer 1	#DIV/0!	#DIV/0!	#DIV/0!	#DIV/0!	#DIV/0!	#DIV/0!	#DIV/0!	#DIV/0!	#DIV/0!	#DIV/0!	#DIV/0!	#DIV/0!	#DIV/0!	#DIV/0!	#DIV/0!	#DIV/0!	#DIV/0!	#DIV/0!	#DIV/0!	#DIV/0!	#DIV/0!	#DIV/0!	#DIV/0!	#DIV/0!	#DIV/0!	#DIV/0!	#DIV/0!	#DIV/0!
308	CTX	VIS	VISmma2/3	480149266	Mediomedial anterior visual area, layer 2/3	#DIV/0!	#DIV/0!	#DIV/0!	#DIV/0!	#DIV/0!	#DIV/0!	#DIV/0!	#DIV/0!	#DIV/0!	#DIV/0!	#DIV/0!	#DIV/0!	#DIV/0!	#DIV/0!	#DIV/0!	#DIV/0!	#DIV/0!	#DIV/0!	#DIV/0!	#DIV/0!	#DIV/0!	#DIV/0!	#DIV/0!	#DIV/0!	#DIV/0!	#DIV/0!	#DIV/0!	#DIV/0!
309	CTX	VIS	VISmma4	480149270	Mediomedial anterior visual area, layer 4	#DIV/0!	#DIV/0!	#DIV/0!	#DIV/0!	#DIV/0!	#DIV/0!	#DIV/0!	#DIV/0!	#DIV/0!	#DIV/0!	#DIV/0!	#DIV/0!	#DIV/0!	#DIV/0!	#DIV/0!	#DIV/0!	#DIV/0!	#DIV/0!	#DIV/0!	#DIV/0!	#DIV/0!	#DIV/0!	#DIV/0!	#DIV/0!	#DIV/0!	#DIV/0!	#DIV/0!	#DIV/0!
310	CTX	VIS	VISmma5	480149274	Mediomedial anterior visual area,layer 5	#DIV/0!	#DIV/0!	#DIV/0!	#DIV/0!	#DIV/0!	#DIV/0!	#DIV/0!	#DIV/0!	#DIV/0!	#DIV/0!	#DIV/0!	#DIV/0!	#DIV/0!	#DIV/0!	#DIV/0!	#DIV/0!	#DIV/0!	#DIV/0!	#DIV/0!	#DIV/0!	#DIV/0!	#DIV/0!	#DIV/0!	#DIV/0!	#DIV/0!	#DIV/0!	#DIV/0!	#DIV/0!
311	CTX	VIS	VISmma6a	480149278	Mediomedial anterior visual area, layer 6a	#DIV/0!	#DIV/0!	#DIV/0!	#DIV/0!	#DIV/0!	#DIV/0!	#DIV/0!	#DIV/0!	#DIV/0!	#DIV/0!	#DIV/0!	#DIV/0!	#DIV/0!	#DIV/0!	#DIV/0!	#DIV/0!	#DIV/0!	#DIV/0!	#DIV/0!	#DIV/0!	#DIV/0!	#DIV/0!	#DIV/0!	#DIV/0!	#DIV/0!	#DIV/0!	#DIV/0!	#DIV/0!
312	CTX	VIS	VISmma6b	480149282	Mediomedial anterior visual area, layer 6b	#DIV/0!	#DIV/0!	#DIV/0!	#DIV/0!	#DIV/0!	#DIV/0!	#DIV/0!	#DIV/0!	#DIV/0!	#DIV/0!	#DIV/0!	#DIV/0!	#DIV/0!	#DIV/0!	#DIV/0!	#DIV/0!	#DIV/0!	#DIV/0!	#DIV/0!	#DIV/0!	#DIV/0!	#DIV/0!	#DIV/0!	#DIV/0!	#DIV/0!	#DIV/0!	#DIV/0!	#DIV/0!
313	CTX	VIS	VISmmp	480149286	Mediomedial posterior visual area	#DIV/0!	#DIV/0!	#DIV/0!	#DIV/0!	#DIV/0!	#DIV/0!	#DIV/0!	#DIV/0!	#DIV/0!	#DIV/0!	#DIV/0!	#DIV/0!	#DIV/0!	#DIV/0!	#DIV/0!	#DIV/0!	#DIV/0!	#DIV/0!	#DIV/0!	#DIV/0!	#DIV/0!	#DIV/0!	#DIV/0!	#DIV/0!	#DIV/0!	#DIV/0!	#DIV/0!	#DIV/0!
314	CTX	VIS	VISmmp1	480149290	Mediomedial posterior visual area, layer 1	#DIV/0!	#DIV/0!	#DIV/0!	#DIV/0!	#DIV/0!	#DIV/0!	#DIV/0!	#DIV/0!	#DIV/0!	#DIV/0!	#DIV/0!	#DIV/0!	#DIV/0!	#DIV/0!	#DIV/0!	#DIV/0!	#DIV/0!	#DIV/0!	#DIV/0!	#DIV/0!	#DIV/0!	#DIV/0!	#DIV/0!	#DIV/0!	#DIV/0!	#DIV/0!	#DIV/0!	#DIV/0!
315	CTX	VIS	VISmmp2/3	480149294	Mediomedial posterior visual area, layer 2/3	#DIV/0!	#DIV/0!	#DIV/0!	#DIV/0!	#DIV/0!	#DIV/0!	#DIV/0!	#DIV/0!	#DIV/0!	#DIV/0!	#DIV/0!	#DIV/0!	#DIV/0!	#DIV/0!	#DIV/0!	#DIV/0!	#DIV/0!	#DIV/0!	#DIV/0!	#DIV/0!	#DIV/0!	#DIV/0!	#DIV/0!	#DIV/0!	#DIV/0!	#DIV/0!	#DIV/0!	#DIV/0!
316	CTX	VIS	VISmmp4	480149298	Mediomedial posterior visual area, layer 4	#DIV/0!	#DIV/0!	#DIV/0!	#DIV/0!	#DIV/0!	#DIV/0!	#DIV/0!	#DIV/0!	#DIV/0!	#DIV/0!	#DIV/0!	#DIV/0!	#DIV/0!	#DIV/0!	#DIV/0!	#DIV/0!	#DIV/0!	#DIV/0!	#DIV/0!	#DIV/0!	#DIV/0!	#DIV/0!	#DIV/0!	#DIV/0!	#DIV/0!	#DIV/0!	#DIV/0!	#DIV/0!
317	CTX	VIS	VISmmp5	480149302	Mediomedial posterior visual area,layer 5	#DIV/0!	#DIV/0!	#DIV/0!	#DIV/0!	#DIV/0!	#DIV/0!	#DIV/0!	#DIV/0!	#DIV/0!	#DIV/0!	#DIV/0!	#DIV/0!	#DIV/0!	#DIV/0!	#DIV/0!	#DIV/0!	#DIV/0!	#DIV/0!	#DIV/0!	#DIV/0!	#DIV/0!	#DIV/0!	#DIV/0!	#DIV/0!	#DIV/0!	#DIV/0!	#DIV/0!	#DIV/0!
318	CTX	VIS	VISmmp6a	480149306	Mediomedial posterior visual area, layer 6a	#DIV/0!	#DIV/0!	#DIV/0!	#DIV/0!	#DIV/0!	#DIV/0!	#DIV/0!	#DIV/0!	#DIV/0!	#DIV/0!	#DIV/0!	#DIV/0!	#DIV/0!	#DIV/0!	#DIV/0!	#DIV/0!	#DIV/0!	#DIV/0!	#DIV/0!	#DIV/0!	#DIV/0!	#DIV/0!	#DIV/0!	#DIV/0!	#DIV/0!	#DIV/0!	#DIV/0!	#DIV/0!
319	CTX	VIS	VISmmp6b	480149310	Mediomedial posterior visual area, layer 6b	#DIV/0!	#DIV/0!	#DIV/0!	#DIV/0!	#DIV/0!	#DIV/0!	#DIV/0!	#DIV/0!	#DIV/0!	#DIV/0!	#DIV/0!	#DIV/0!	#DIV/0!	#DIV/0!	#DIV/0!	#DIV/0!	#DIV/0!	#DIV/0!	#DIV/0!	#DIV/0!	#DIV/0!	#DIV/0!	#DIV/0!	#DIV/0!	#DIV/0!	#DIV/0!	#DIV/0!	#DIV/0!
320	CTX	VIS	VISm	480149314	Medial visual area	#DIV/0!	#DIV/0!	#DIV/0!	#DIV/0!	#DIV/0!	#DIV/0!	#DIV/0!	#DIV/0!	#DIV/0!	#DIV/0!	#DIV/0!	#DIV/0!	#DIV/0!	#DIV/0!	#DIV/0!	#DIV/0!	#DIV/0!	#DIV/0!	#DIV/0!	#DIV/0!	#DIV/0!	#DIV/0!	#DIV/0!	#DIV/0!	#DIV/0!	#DIV/0!	#DIV/0!	#DIV/0!
321	CTX	VIS	VISm1	480149318	Medial visual area, layer 1	#DIV/0!	#DIV/0!	#DIV/0!	#DIV/0!	#DIV/0!	#DIV/0!	#DIV/0!	#DIV/0!	#DIV/0!	#DIV/0!	#DIV/0!	#DIV/0!	#DIV/0!	#DIV/0!	#DIV/0!	#DIV/0!	#DIV/0!	#DIV/0!	#DIV/0!	#DIV/0!	#DIV/0!	#DIV/0!	#DIV/0!	#DIV/0!	#DIV/0!	#DIV/0!	#DIV/0!	#DIV/0!
322	CTX	VIS	VISm2/3	480149322	Medial visual area, layer 2/3	#DIV/0!	#DIV/0!	#DIV/0!	#DIV/0!	#DIV/0!	#DIV/0!	#DIV/0!	#DIV/0!	#DIV/0!	#DIV/0!	#DIV/0!	#DIV/0!	#DIV/0!	#DIV/0!	#DIV/0!	#DIV/0!	#DIV/0!	#DIV/0!	#DIV/0!	#DIV/0!	#DIV/0!	#DIV/0!	#DIV/0!	#DIV/0!	#DIV/0!	#DIV/0!	#DIV/0!	#DIV/0!
323	CTX	VIS	VISm4	480149326	Medial visual area, layer 4	#DIV/0!	#DIV/0!	#DIV/0!	#DIV/0!	#DIV/0!	#DIV/0!	#DIV/0!	#DIV/0!	#DIV/0!	#DIV/0!	#DIV/0!	#DIV/0!	#DIV/0!	#DIV/0!	#DIV/0!	#DIV/0!	#DIV/0!	#DIV/0!	#DIV/0!	#DIV/0!	#DIV/0!	#DIV/0!	#DIV/0!	#DIV/0!	#DIV/0!	#DIV/0!	#DIV/0!	#DIV/0!
324	CTX	VIS	VISm5	480149330	Medial visual area,layer 5	#DIV/0!	#DIV/0!	#DIV/0!	#DIV/0!	#DIV/0!	#DIV/0!	#DIV/0!	#DIV/0!	#DIV/0!	#DIV/0!	#DIV/0!	#DIV/0!	#DIV/0!	#DIV/0!	#DIV/0!	#DIV/0!	#DIV/0!	#DIV/0!	#DIV/0!	#DIV/0!	#DIV/0!	#DIV/0!	#DIV/0!	#DIV/0!	#DIV/0!	#DIV/0!	#DIV/0!	#DIV/0!
325	CTX	VIS	VISm6a	480149334	Medial visual area, layer 6a	#DIV/0!	#DIV/0!	#DIV/0!	#DIV/0!	#DIV/0!	#DIV/0!	#DIV/0!	#DIV/0!	#DIV/0!	#DIV/0!	#DIV/0!	#DIV/0!	#DIV/0!	#DIV/0!	#DIV/0!	#DIV/0!	#DIV/0!	#DIV/0!	#DIV/0!	#DIV/0!	#DIV/0!	#DIV/0!	#DIV/0!	#DIV/0!	#DIV/0!	#DIV/0!	#DIV/0!	#DIV/0!
326	CTX	VIS	VISm6b	480149338	Medial visual area, layer 6b	#DIV/0!	#DIV/0!	#DIV/0!	#DIV/0!	#DIV/0!	#DIV/0!	#DIV/0!	#DIV/0!	#DIV/0!	#DIV/0!	#DIV/0!	#DIV/0!	#DIV/0!	#DIV/0!	#DIV/0!	#DIV/0!	#DIV/0!	#DIV/0!	#DIV/0!	#DIV/0!	#DIV/0!	#DIV/0!	#DIV/0!	#DIV/0!	#DIV/0!	#DIV/0!	#DIV/0!	#DIV/0!
327	CTX	RSP	RSPd	879	Retrosplenial area, dorsal part	#DIV/0!	#DIV/0!	#DIV/0!	#DIV/0!	#DIV/0!	#DIV/0!	#DIV/0!	#DIV/0!	#DIV/0!	#DIV/0!	#DIV/0!	#DIV/0!	#DIV/0!	#DIV/0!	#DIV/0!	#DIV/0!	#DIV/0!	#DIV/0!	#DIV/0!	#DIV/0!	#DIV/0!	#DIV/0!	#DIV/0!	#DIV/0!	#DIV/0!	#DIV/0!	#DIV/0!	#DIV/0!
328	CTX	RSP	RSPd1	442	Retrosplenial area, dorsal part, layer 1	0.0174519	0.0128836	0.00713901	0.0161534	0.0477	0.0237147	0.0565462	0.0478445	0.085075	0.120166	0.0872483	0.0967392	0.000238074	7.83551e-05	0.000122394	0.000274974	0.0044022	0.011068	0.00685527	0.00645984	0.00210124	0.00466925	0.00923657	0.00803306	0.00992194	0.0120967	0.0177208	0.0155209
329	CTX	RSP	RSPd2/3	434	Retrosplenial area, dorsal part, layer 2/3	0.0579767	0.0685144	0.0374297	0.0706483	0.117194	0.0834711	0.100741	0.114839	0.148105	0.164356	0.15992	0.146626	0.000245105	0.000123983	0.000334308	0.0001651	0.014401	0.022931	0.0156696	0.0223669	0.0108751	0.0173286	0.0277172	0.0213459	0.0318117	0.0409184	0.0381979	0.0494373
330	CTX	RSP	RSPd4	545	Retrosplenial area, dorsal part, layer 4	#DIV/0!	#DIV/0!	#DIV/0!	#DIV/0!	#DIV/0!	#DIV/0!	#DIV/0!	#DIV/0!	#DIV/0!	#DIV/0!	#DIV/0!	#DIV/0!	#DIV/0!	#DIV/0!	#DIV/0!	#DIV/0!	#DIV/0!	#DIV/0!	#DIV/0!	#DIV/0!	#DIV/0!	#DIV/0!	#DIV/0!	#DIV/0!	#DIV/0!	#DIV/0!	#DIV/0!	#DIV/0!
331	CTX	RSP	RSPd5	610	Retrosplenial area, dorsal part, layer 5	0.0495327	0.0582022	0.0434674	0.0576617	0.0953191	0.099708	0.0978731	0.0982855	0.138695	0.141587	0.131191	0.131719	0.000964207	0.00071004	0.00119026	0.000963003	0.0220005	0.0237635	0.0155379	0.0235517	0.0144039	0.0295069	0.0309015	0.0293511	0.0434266	0.0589623	0.0385919	0.0473645
332	CTX	RSP	RSPd6a	274	Retrosplenial area, dorsal part, layer 6a	0.0380994	0.050676	0.0611662	0.0540814	0.0890654	0.099933	0.0950005	0.097748	1.09951	0.12534	0.10511	0.11315	0.000776394	0.000410627	0.000791149	0.000349017	0.0172666	0.0220455	0.0131726	0.0282631	0.025387	0.0357599	0.029939	0.0267473	0.042382	0.0535928	0.0392186	0.0451967
333	CTX	RSP	RSPd6b	330	Retrosplenial area, dorsal part, layer 6b	0.0443169	0.0557571	0.0522152	0.0323707	0.0692388	0.0895614	0.0831752	0.0419233	0.0678681	0.0528475	0.0667219	0.105482	0.000913151	#DIV/0!	0.00473594	0.00113821	0.0131892	0.0152497	0.00980098	0.0397233	0.0189661	0.0499576	0.0303445	0.0255783	0.0533829	0.0350694	0.0371416	0.0350184
334	CTX	RSP	RSPv	886	Retrosplenial area, ventral part	#DIV/0!	#DIV/0!	#DIV/0!	#DIV/0!	#DIV/0!	#DIV/0!	#DIV/0!	#DIV/0!	#DIV/0!	#DIV/0!	#DIV/0!	#DIV/0!	#DIV/0!	#DIV/0!	#DIV/0!	#DIV/0!	#DIV/0!	#DIV/0!	#DIV/0!	#DIV/0!	#DIV/0!	#DIV/0!	#DIV/0!	#DIV/0!	#DIV/0!	#DIV/0!	#DIV/0!	#DIV/0!
335	CTX	RSP	RSPv1	542	Retrosplenial area, ventral part, layer 1	0.0145695	0.0313342	0.0142183	0.0249692	0.0669122	0.064362	0.0648627	0.0798111	0.088247	0.107496	0.096428	0.122061	0.000601117	0.000212691	0.00248795	0.000219224	0.00392503	0.00588162	0.00193963	0.00390875	0.00194999	0.00649449	0.00570278	0.00836428	0.0150923	0.0222884	0.0128601	0.0124206
336	CTX	RSP	RSPv2	606	Retrosplenial area, ventral part, layer 2	#DIV/0!	#DIV/0!	#DIV/0!	#DIV/0!	#DIV/0!	#DIV/0!	#DIV/0!	#DIV/0!	#DIV/0!	#DIV/0!	#DIV/0!	#DIV/0!	#DIV/0!	#DIV/0!	#DIV/0!	#DIV/0!	#DIV/0!	#DIV/0!	#DIV/0!	#DIV/0!	#DIV/0!	#DIV/0!	#DIV/0!	#DIV/0!	#DIV/0!	#DIV/0!	#DIV/0!	#DIV/0!
337	CTX	RSP	RSPv2/3	430	Retrosplenial area, ventral part, layer 2/3	0.0481358	0.0811566	0.0475007	0.0650057	0.136554	0.131317	0.144157	0.126829	0.147556	0.137726	0.136045	0.142651	0.00104487	0.000339072	0.00203142	0.00036729	0.00975012	0.00392925	0.00310451	0.00662941	0.00461901	0.0137557	0.0110922	0.0218134	0.0218236	0.0304481	0.0154451	0.021195
338	CTX	RSP	RSPv5	687	Retrosplenial area, ventral part, layer 5	0.047042	0.0640093	0.0503449	0.0576202	0.11894	0.109493	0.111952	0.113391	0.175415	0.160352	0.137233	0.130896	0.00053996	0.00213952	0.00170061	0.00153565	0.0216688	0.0196469	0.014183	0.0173699	0.0093154	0.0385887	0.0299779	0.0316897	0.0477127	0.0493741	0.0384387	0.0458291
339	CTX	RSP	RSPv6a	590	Retrosplenial area, ventral part, layer 6a	0.0535235	0.0647562	0.058113	0.0636053	0.100335	0.0961232	0.110823	0.102158	2.85874	0.120136	0.114968	0.110656	0.000339385	0.00106808	0.000773805	0.00109213	0.0167256	0.0218436	0.011082	0.0172696	0.0157522	0.0299591	0.0284681	0.028332	0.0477029	0.0564759	0.0421244	0.0494889
340	CTX	RSP	RSPv6b	622	Retrosplenial area, ventral part, layer 6b	0.0255369	0.0448662	0.0677832	0.0283388	0.0807722	0.0669057	0.102731	0.068116	0.10046	0.0780835	0.0870919	0.0781452	0.00145741	#DIV/0!	#DIV/0!	0.000931801	0.0120806	0.019174	0.016376	0.0147272	0.0231595	0.0252178	0.0242866	0.0262824	0.0233294	0.043957	0.0419418	0.0394129
341	CTX	PTLp	PTLp	22	Posterior parietal association areas	#DIV/0!	#DIV/0!	#DIV/0!	#DIV/0!	#DIV/0!	#DIV/0!	#DIV/0!	#DIV/0!	#DIV/0!	#DIV/0!	#DIV/0!	#DIV/0!	#DIV/0!	#DIV/0!	#DIV/0!	#DIV/0!	#DIV/0!	#DIV/0!	#DIV/0!	#DIV/0!	#DIV/0!	#DIV/0!	#DIV/0!	#DIV/0!	#DIV/0!	#DIV/0!	#DIV/0!	#DIV/0!
342	CTX	PTLp	PTLp1	532	Posterior parietal association areas, layer 1	#DIV/0!	#DIV/0!	#DIV/0!	#DIV/0!	#DIV/0!	#DIV/0!	#DIV/0!	#DIV/0!	#DIV/0!	#DIV/0!	#DIV/0!	#DIV/0!	#DIV/0!	#DIV/0!	#DIV/0!	#DIV/0!	#DIV/0!	#DIV/0!	#DIV/0!	#DIV/0!	#DIV/0!	#DIV/0!	#DIV/0!	#DIV/0!	#DIV/0!	#DIV/0!	#DIV/0!	#DIV/0!
343	CTX	PTLp	PTLp2/3	241	Posterior parietal association areas, layer 2/3	#DIV/0!	#DIV/0!	#DIV/0!	#DIV/0!	#DIV/0!	#DIV/0!	#DIV/0!	#DIV/0!	#DIV/0!	#DIV/0!	#DIV/0!	#DIV/0!	#DIV/0!	#DIV/0!	#DIV/0!	#DIV/0!	#DIV/0!	#DIV/0!	#DIV/0!	#DIV/0!	#DIV/0!	#DIV/0!	#DIV/0!	#DIV/0!	#DIV/0!	#DIV/0!	#DIV/0!	#DIV/0!
344	CTX	PTLp	PTLp4	635	Posterior parietal association areas, layer 4	#DIV/0!	#DIV/0!	#DIV/0!	#DIV/0!	#DIV/0!	#DIV/0!	#DIV/0!	#DIV/0!	#DIV/0!	#DIV/0!	#DIV/0!	#DIV/0!	#DIV/0!	#DIV/0!	#DIV/0!	#DIV/0!	#DIV/0!	#DIV/0!	#DIV/0!	#DIV/0!	#DIV/0!	#DIV/0!	#DIV/0!	#DIV/0!	#DIV/0!	#DIV/0!	#DIV/0!	#DIV/0!
345	CTX	PTLp	PTLp5	683	Posterior parietal association areas, layer 5	#DIV/0!	#DIV/0!	#DIV/0!	#DIV/0!	#DIV/0!	#DIV/0!	#DIV/0!	#DIV/0!	#DIV/0!	#DIV/0!	#DIV/0!	#DIV/0!	#DIV/0!	#DIV/0!	#DIV/0!	#DIV/0!	#DIV/0!	#DIV/0!	#DIV/0!	#DIV/0!	#DIV/0!	#DIV/0!	#DIV/0!	#DIV/0!	#DIV/0!	#DIV/0!	#DIV/0!	#DIV/0!
346	CTX	PTLp	PTLp6a	308	Posterior parietal association areas, layer 6a	#DIV/0!	#DIV/0!	#DIV/0!	#DIV/0!	#DIV/0!	#DIV/0!	#DIV/0!	#DIV/0!	#DIV/0!	#DIV/0!	#DIV/0!	#DIV/0!	#DIV/0!	#DIV/0!	#DIV/0!	#DIV/0!	#DIV/0!	#DIV/0!	#DIV/0!	#DIV/0!	#DIV/0!	#DIV/0!	#DIV/0!	#DIV/0!	#DIV/0!	#DIV/0!	#DIV/0!	#DIV/0!
347	CTX	PTLp	PTLp6b	340	Posterior parietal association areas, layer 6b	#DIV/0!	#DIV/0!	#DIV/0!	#DIV/0!	#DIV/0!	#DIV/0!	#DIV/0!	#DIV/0!	#DIV/0!	#DIV/0!	#DIV/0!	#DIV/0!	#DIV/0!	#DIV/0!	#DIV/0!	#DIV/0!	#DIV/0!	#DIV/0!	#DIV/0!	#DIV/0!	#DIV/0!	#DIV/0!	#DIV/0!	#DIV/0!	#DIV/0!	#DIV/0!	#DIV/0!	#DIV/0!
348	CTX	PTLp	VISa	312782546	Anterior area	#DIV/0!	#DIV/0!	#DIV/0!	#DIV/0!	#DIV/0!	#DIV/0!	#DIV/0!	#DIV/0!	#DIV/0!	#DIV/0!	#DIV/0!	#DIV/0!	#DIV/0!	#DIV/0!	#DIV/0!	#DIV/0!	#DIV/0!	#DIV/0!	#DIV/0!	#DIV/0!	#DIV/0!	#DIV/0!	#DIV/0!	#DIV/0!	#DIV/0!	#DIV/0!	#DIV/0!	#DIV/0!
349	CTX	PTLp	VISa1	312782550	Anterior area, layer 1	#DIV/0!	#DIV/0!	#DIV/0!	#DIV/0!	#DIV/0!	#DIV/0!	0.0250011	#DIV/0!	0.0262224	#DIV/0!	#DIV/0!	#DIV/0!	#DIV/0!	#DIV/0!	#DIV/0!	#DIV/0!	#DIV/0!	#DIV/0!	#DIV/0!	#DIV/0!	0.000340608	0.0047678	#DIV/0!	#DIV/0!	#DIV/0!	#DIV/0!	#DIV/0!	#DIV/0!
350	CTX	PTLp	VISa2/3	312782554	Anterior area, layer 2/3	#DIV/0!	#DIV/0!	#DIV/0!	#DIV/0!	0.0601547	#DIV/0!	0.118367	#DIV/0!	0.421663	#DIV/0!	#DIV/0!	#DIV/0!	#DIV/0!	#DIV/0!	#DIV/0!	#DIV/0!	#DIV/0!	#DIV/0!	#DIV/0!	#DIV/0!	0.0428207	0.0314669	#DIV/0!	#DIV/0!	0.0248454	#DIV/0!	#DIV/0!	#DIV/0!
351	CTX	PTLp	VISa4	312782558	Anterior area, layer 4	#DIV/0!	#DIV/0!	#DIV/0!	#DIV/0!	0.230293	#DIV/0!	0.157077	#DIV/0!	0.0423062	#DIV/0!	#DIV/0!	#DIV/0!	#DIV/0!	#DIV/0!	#DIV/0!	#DIV/0!	#DIV/0!	#DIV/0!	#DIV/0!	#DIV/0!	0.0291087	0.0479832	#DIV/0!	#DIV/0!	0.100537	#DIV/0!	#DIV/0!	#DIV/0!
352	CTX	PTLp	VISa5	312782562	Anterior area, layer 5	#DIV/0!	#DIV/0!	#DIV/0!	#DIV/0!	0.10156	#DIV/0!	0.122582	#DIV/0!	0.187088	#DIV/0!	#DIV/0!	#DIV/0!	#DIV/0!	#DIV/0!	#DIV/0!	#DIV/0!	#DIV/0!	#DIV/0!	#DIV/0!	#DIV/0!	0.0316918	0.0442878	#DIV/0!	0.00471342	0.0466937	#DIV/0!	#DIV/0!	#DIV/0!
353	CTX	PTLp	VISa6a	312782566	Anterior area, layer 6a	#DIV/0!	#DIV/0!	#DIV/0!	#DIV/0!	0.099247	#DIV/0!	0.102016	#DIV/0!	1.01068	#DIV/0!	0.099594	#DIV/0!	#DIV/0!	#DIV/0!	#DIV/0!	#DIV/0!	#DIV/0!	0.0281636	#DIV/0!	#DIV/0!	0.0359091	0.0468552	#DIV/0!	0.0499214	0.0670878	#DIV/0!	#DIV/0!	#DIV/0!
354	CTX	PTLp	VISa6b	312782570	Anterior area, layer 6b	#DIV/0!	#DIV/0!	#DIV/0!	#DIV/0!	0.0501393	#DIV/0!	0.0769399	#DIV/0!	#DIV/0!	#DIV/0!	0.09631	#DIV/0!	#DIV/0!	#DIV/0!	#DIV/0!	#DIV/0!	#DIV/0!	#DIV/0!	#DIV/0!	#DIV/0!	0.03945	0.0199713	#DIV/0!	#DIV/0!	0.0547056	#DIV/0!	#DIV/0!	#DIV/0!
355	CTX	PTLp	VISrl	417	Rostrolateral visual area	#DIV/0!	#DIV/0!	#DIV/0!	#DIV/0!	#DIV/0!	#DIV/0!	#DIV/0!	#DIV/0!	#DIV/0!	#DIV/0!	#DIV/0!	#DIV/0!	#DIV/0!	#DIV/0!	#DIV/0!	#DIV/0!	#DIV/0!	#DIV/0!	#DIV/0!	#DIV/0!	#DIV/0!	#DIV/0!	#DIV/0!	#DIV/0!	#DIV/0!	#DIV/0!	#DIV/0!	#DIV/0!
356	CTX	PTLp	VISrl1	312782604	Rostrolateral area, layer 1	#DIV/0!	#DIV/0!	#DIV/0!	#DIV/0!	#DIV/0!	#DIV/0!	#DIV/0!	#DIV/0!	#DIV/0!	#DIV/0!	#DIV/0!	#DIV/0!	#DIV/0!	#DIV/0!	#DIV/0!	#DIV/0!	#DIV/0!	#DIV/0!	#DIV/0!	#DIV/0!	#DIV/0!	#DIV/0!	#DIV/0!	#DIV/0!	#DIV/0!	#DIV/0!	#DIV/0!	#DIV/0!
357	CTX	PTLp	VISrl2/3	312782608	Rostrolateral area, layer 2/3	#DIV/0!	#DIV/0!	#DIV/0!	#DIV/0!	#DIV/0!	#DIV/0!	#DIV/0!	#DIV/0!	#DIV/0!	#DIV/0!	#DIV/0!	#DIV/0!	#DIV/0!	#DIV/0!	#DIV/0!	#DIV/0!	#DIV/0!	#DIV/0!	#DIV/0!	#DIV/0!	#DIV/0!	#DIV/0!	#DIV/0!	#DIV/0!	#DIV/0!	#DIV/0!	#DIV/0!	#DIV/0!
358	CTX	PTLp	VISrl4	312782612	Rostrolateral area, layer 4	#DIV/0!	#DIV/0!	#DIV/0!	#DIV/0!	#DIV/0!	#DIV/0!	#DIV/0!	#DIV/0!	#DIV/0!	#DIV/0!	#DIV/0!	#DIV/0!	#DIV/0!	#DIV/0!	#DIV/0!	#DIV/0!	#DIV/0!	#DIV/0!	#DIV/0!	#DIV/0!	#DIV/0!	#DIV/0!	#DIV/0!	#DIV/0!	#DIV/0!	#DIV/0!	#DIV/0!	#DIV/0!
359	CTX	PTLp	VISrl5	312782616	Rostrolateral area, layer 5	#DIV/0!	#DIV/0!	#DIV/0!	#DIV/0!	#DIV/0!	#DIV/0!	#DIV/0!	#DIV/0!	#DIV/0!	#DIV/0!	#DIV/0!	#DIV/0!	#DIV/0!	#DIV/0!	#DIV/0!	#DIV/0!	#DIV/0!	#DIV/0!	#DIV/0!	#DIV/0!	#DIV/0!	#DIV/0!	#DIV/0!	#DIV/0!	#DIV/0!	#DIV/0!	#DIV/0!	#DIV/0!
360	CTX	PTLp	VISrl6a	312782620	Rostrolateral area, layer 6a	#DIV/0!	#DIV/0!	#DIV/0!	#DIV/0!	#DIV/0!	#DIV/0!	#DIV/0!	#DIV/0!	#DIV/0!	#DIV/0!	#DIV/0!	#DIV/0!	#DIV/0!	#DIV/0!	#DIV/0!	#DIV/0!	#DIV/0!	#DIV/0!	#DIV/0!	#DIV/0!	#DIV/0!	#DIV/0!	#DIV/0!	#DIV/0!	#DIV/0!	#DIV/0!	#DIV/0!	#DIV/0!
361	CTX	PTLp	VISrl6b	312782624	Rostrolateral area, layer 6b	#DIV/0!	#DIV/0!	#DIV/0!	#DIV/0!	#DIV/0!	#DIV/0!	#DIV/0!	#DIV/0!	#DIV/0!	#DIV/0!	#DIV/0!	#DIV/0!	#DIV/0!	#DIV/0!	#DIV/0!	#DIV/0!	#DIV/0!	#DIV/0!	#DIV/0!	#DIV/0!	#DIV/0!	#DIV/0!	#DIV/0!	#DIV/0!	#DIV/0!	#DIV/0!	#DIV/0!	#DIV/0!
362	CTX	Tea	TEa	541	Temporal association areas	#DIV/0!	#DIV/0!	#DIV/0!	#DIV/0!	#DIV/0!	#DIV/0!	#DIV/0!	#DIV/0!	#DIV/0!	#DIV/0!	#DIV/0!	#DIV/0!	#DIV/0!	#DIV/0!	#DIV/0!	#DIV/0!	#DIV/0!	#DIV/0!	#DIV/0!	#DIV/0!	#DIV/0!	#DIV/0!	#DIV/0!	#DIV/0!	#DIV/0!	#DIV/0!	#DIV/0!	#DIV/0!
363	CTX	Tea	TEa1	97	Temporal association areas, layer 1	#DIV/0!	#DIV/0!	#DIV/0!	#DIV/0!	#DIV/0!	#DIV/0!	#DIV/0!	#DIV/0!	#DIV/0!	#DIV/0!	#DIV/0!	#DIV/0!	#DIV/0!	#DIV/0!	#DIV/0!	#DIV/0!	#DIV/0!	#DIV/0!	#DIV/0!	#DIV/0!	#DIV/0!	#DIV/0!	#DIV/0!	#DIV/0!	#DIV/0!	#DIV/0!	#DIV/0!	#DIV/0!
364	CTX	Tea	TEa2/3	1127	Temporal association areas, layer 2/3	#DIV/0!	#DIV/0!	#DIV/0!	#DIV/0!	#DIV/0!	#DIV/0!	#DIV/0!	#DIV/0!	#DIV/0!	#DIV/0!	#DIV/0!	#DIV/0!	#DIV/0!	#DIV/0!	#DIV/0!	#DIV/0!	#DIV/0!	#DIV/0!	#DIV/0!	#DIV/0!	#DIV/0!	#DIV/0!	#DIV/0!	#DIV/0!	#DIV/0!	#DIV/0!	#DIV/0!	#DIV/0!
365	CTX	Tea	TEa4	234	Temporal association areas, layer 4	#DIV/0!	#DIV/0!	#DIV/0!	#DIV/0!	#DIV/0!	#DIV/0!	#DIV/0!	#DIV/0!	#DIV/0!	#DIV/0!	#DIV/0!	#DIV/0!	#DIV/0!	#DIV/0!	#DIV/0!	#DIV/0!	#DIV/0!	#DIV/0!	#DIV/0!	#DIV/0!	#DIV/0!	#DIV/0!	#DIV/0!	#DIV/0!	#DIV/0!	#DIV/0!	#DIV/0!	#DIV/0!
366	CTX	Tea	TEa5	289	Temporal association areas, layer 5	#DIV/0!	#DIV/0!	#DIV/0!	#DIV/0!	#DIV/0!	#DIV/0!	#DIV/0!	#DIV/0!	#DIV/0!	#DIV/0!	#DIV/0!	#DIV/0!	#DIV/0!	#DIV/0!	#DIV/0!	#DIV/0!	#DIV/0!	#DIV/0!	#DIV/0!	#DIV/0!	#DIV/0!	#DIV/0!	#DIV/0!	#DIV/0!	#DIV/0!	#DIV/0!	#DIV/0!	#DIV/0!
367	CTX	Tea	TEa6a	729	Temporal association areas, layer 6a	#DIV/0!	#DIV/0!	#DIV/0!	#DIV/0!	#DIV/0!	#DIV/0!	#DIV/0!	#DIV/0!	#DIV/0!	#DIV/0!	#DIV/0!	#DIV/0!	#DIV/0!	#DIV/0!	#DIV/0!	#DIV/0!	#DIV/0!	#DIV/0!	#DIV/0!	#DIV/0!	#DIV/0!	#DIV/0!	#DIV/0!	#DIV/0!	#DIV/0!	#DIV/0!	#DIV/0!	#DIV/0!
368	CTX	Tea	TEa6b	786	Temporal association areas, layer 6b	#DIV/0!	#DIV/0!	#DIV/0!	#DIV/0!	#DIV/0!	#DIV/0!	#DIV/0!	#DIV/0!	#DIV/0!	#DIV/0!	#DIV/0!	#DIV/0!	#DIV/0!	#DIV/0!	#DIV/0!	#DIV/0!	#DIV/0!	#DIV/0!	#DIV/0!	#DIV/0!	#DIV/0!	#DIV/0!	#DIV/0!	#DIV/0!	#DIV/0!	#DIV/0!	#DIV/0!	#DIV/0!
369	CTX	PERI	PERI	922	Perirhinal area	#DIV/0!	#DIV/0!	#DIV/0!	#DIV/0!	#DIV/0!	#DIV/0!	#DIV/0!	#DIV/0!	#DIV/0!	#DIV/0!	#DIV/0!	#DIV/0!	#DIV/0!	#DIV/0!	#DIV/0!	#DIV/0!	#DIV/0!	#DIV/0!	#DIV/0!	#DIV/0!	#DIV/0!	#DIV/0!	#DIV/0!	#DIV/0!	#DIV/0!	#DIV/0!	#DIV/0!	#DIV/0!
370	CTX	PERI	PERI1	540	Perirhinal area, layer 1	#DIV/0!	#DIV/0!	#DIV/0!	#DIV/0!	#DIV/0!	#DIV/0!	#DIV/0!	#DIV/0!	#DIV/0!	#DIV/0!	#DIV/0!	#DIV/0!	#DIV/0!	#DIV/0!	#DIV/0!	#DIV/0!	#DIV/0!	#DIV/0!	#DIV/0!	#DIV/0!	#DIV/0!	#DIV/0!	#DIV/0!	#DIV/0!	#DIV/0!	#DIV/0!	#DIV/0!	#DIV/0!
371	CTX	PERI	PERI2/3	888	Perirhinal area, layer 2/3	#DIV/0!	#DIV/0!	#DIV/0!	#DIV/0!	#DIV/0!	#DIV/0!	#DIV/0!	#DIV/0!	#DIV/0!	#DIV/0!	#DIV/0!	#DIV/0!	#DIV/0!	#DIV/0!	#DIV/0!	#DIV/0!	#DIV/0!	#DIV/0!	#DIV/0!	#DIV/0!	#DIV/0!	#DIV/0!	#DIV/0!	#DIV/0!	#DIV/0!	#DIV/0!	#DIV/0!	#DIV/0!
372	CTX	PERI	PERI5	692	Perirhinal area, layer 5	#DIV/0!	#DIV/0!	#DIV/0!	#DIV/0!	#DIV/0!	#DIV/0!	#DIV/0!	#DIV/0!	#DIV/0!	#DIV/0!	#DIV/0!	#DIV/0!	#DIV/0!	#DIV/0!	#DIV/0!	#DIV/0!	#DIV/0!	#DIV/0!	#DIV/0!	#DIV/0!	#DIV/0!	#DIV/0!	#DIV/0!	#DIV/0!	#DIV/0!	#DIV/0!	#DIV/0!	#DIV/0!
373	CTX	PERI	PERI6a	335	Perirhinal area, layer 6a	#DIV/0!	#DIV/0!	#DIV/0!	#DIV/0!	#DIV/0!	#DIV/0!	#DIV/0!	#DIV/0!	#DIV/0!	#DIV/0!	#DIV/0!	#DIV/0!	#DIV/0!	#DIV/0!	#DIV/0!	#DIV/0!	#DIV/0!	#DIV/0!	#DIV/0!	#DIV/0!	#DIV/0!	#DIV/0!	#DIV/0!	#DIV/0!	#DIV/0!	#DIV/0!	#DIV/0!	#DIV/0!
374	CTX	PERI	PERI6b	368	Perirhinal area, layer 6b	#DIV/0!	#DIV/0!	#DIV/0!	#DIV/0!	#DIV/0!	#DIV/0!	#DIV/0!	#DIV/0!	#DIV/0!	#DIV/0!	#DIV/0!	#DIV/0!	#DIV/0!	#DIV/0!	#DIV/0!	#DIV/0!	#DIV/0!	#DIV/0!	#DIV/0!	#DIV/0!	#DIV/0!	#DIV/0!	#DIV/0!	#DIV/0!	#DIV/0!	#DIV/0!	#DIV/0!	#DIV/0!
375	CTX	ECT	ECT	895	Ectorhinal area	#DIV/0!	#DIV/0!	#DIV/0!	#DIV/0!	#DIV/0!	#DIV/0!	#DIV/0!	#DIV/0!	#DIV/0!	#DIV/0!	#DIV/0!	#DIV/0!	#DIV/0!	#DIV/0!	#DIV/0!	#DIV/0!	#DIV/0!	#DIV/0!	#DIV/0!	#DIV/0!	#DIV/0!	#DIV/0!	#DIV/0!	#DIV/0!	#DIV/0!	#DIV/0!	#DIV/0!	#DIV/0!
376	CTX	ECT	ECT1	836	Ectorhinal area/Layer 1	#DIV/0!	#DIV/0!	#DIV/0!	#DIV/0!	#DIV/0!	#DIV/0!	#DIV/0!	#DIV/0!	#DIV/0!	#DIV/0!	#DIV/0!	#DIV/0!	#DIV/0!	#DIV/0!	#DIV/0!	#DIV/0!	#DIV/0!	#DIV/0!	#DIV/0!	#DIV/0!	#DIV/0!	#DIV/0!	#DIV/0!	#DIV/0!	#DIV/0!	#DIV/0!	#DIV/0!	#DIV/0!
377	CTX	ECT	ECT2/3	427	Ectorhinal area/Layer 2/3	#DIV/0!	#DIV/0!	#DIV/0!	#DIV/0!	#DIV/0!	#DIV/0!	#DIV/0!	#DIV/0!	#DIV/0!	#DIV/0!	#DIV/0!	#DIV/0!	#DIV/0!	#DIV/0!	#DIV/0!	#DIV/0!	#DIV/0!	#DIV/0!	#DIV/0!	#DIV/0!	#DIV/0!	#DIV/0!	#DIV/0!	#DIV/0!	#DIV/0!	#DIV/0!	#DIV/0!	#DIV/0!
378	CTX	ECT	ECT5	988	Ectorhinal area/Layer 5	#DIV/0!	#DIV/0!	#DIV/0!	#DIV/0!	#DIV/0!	#DIV/0!	#DIV/0!	#DIV/0!	#DIV/0!	#DIV/0!	#DIV/0!	#DIV/0!	#DIV/0!	#DIV/0!	#DIV/0!	#DIV/0!	#DIV/0!	#DIV/0!	#DIV/0!	#DIV/0!	#DIV/0!	#DIV/0!	#DIV/0!	#DIV/0!	#DIV/0!	#DIV/0!	#DIV/0!	#DIV/0!
379	CTX	ECT	ECT6a	977	Ectorhinal area/Layer 6a	#DIV/0!	#DIV/0!	#DIV/0!	#DIV/0!	#DIV/0!	#DIV/0!	#DIV/0!	#DIV/0!	#DIV/0!	#DIV/0!	#DIV/0!	#DIV/0!	#DIV/0!	#DIV/0!	#DIV/0!	#DIV/0!	#DIV/0!	#DIV/0!	#DIV/0!	#DIV/0!	#DIV/0!	#DIV/0!	#DIV/0!	#DIV/0!	#DIV/0!	#DIV/0!	#DIV/0!	#DIV/0!
380	CTX	ECT	ECT6b	1045	Ectorhinal area/Layer 6b	#DIV/0!	#DIV/0!	#DIV/0!	#DIV/0!	#DIV/0!	#DIV/0!	#DIV/0!	#DIV/0!	#DIV/0!	#DIV/0!	#DIV/0!	#DIV/0!	#DIV/0!	#DIV/0!	#DIV/0!	#DIV/0!	#DIV/0!	#DIV/0!	#DIV/0!	#DIV/0!	#DIV/0!	#DIV/0!	#DIV/0!	#DIV/0!	#DIV/0!	#DIV/0!	#DIV/0!	#DIV/0!
381	CTX	OLF	OLF	698	Olfactory areas	0.0152855	0.0163289	0.0170618	0.0231767	0.0535442	0.0599126	0.063676	0.0264043	0.0848673	0.0928907	0.0779116	0.0733173	0.000827763	0.000811293	0.00134163	0.000383911	0.00646075	0.0101074	0.00623715	0.00589498	0.00953069	0.0106046	0.00817375	0.0114353	0.0140528	0.0168346	0.0109851	0.0114335
382	CTX	OLF	MOB	507	Main olfactory bulb	0.011038	0.0235125	0.0188841	0.0217728	0.0704861	0.0659651	0.0742087	0.0400928	0.104464	0.115246	0.100399	0.098029	0.00239454	0.000632096	0.00200543	0.000252074	0.00449258	0.00602575	0.00526861	0.00370956	0.00483668	0.00676122	0.00502619	0.00687075	0.00895795	0.0111473	0.00968212	0.00732876
383	CTX	OLF	MOBgl	212	Main olfactory bulb, glomerular layer	#DIV/0!	#DIV/0!	#DIV/0!	#DIV/0!	#DIV/0!	#DIV/0!	#DIV/0!	#DIV/0!	#DIV/0!	#DIV/0!	#DIV/0!	#DIV/0!	#DIV/0!	#DIV/0!	#DIV/0!	#DIV/0!	#DIV/0!	#DIV/0!	#DIV/0!	#DIV/0!	#DIV/0!	#DIV/0!	#DIV/0!	#DIV/0!	#DIV/0!	#DIV/0!	#DIV/0!	#DIV/0!
384	CTX	OLF	MOBgr	220	Main olfactory bulb, granule layer	#DIV/0!	#DIV/0!	#DIV/0!	#DIV/0!	#DIV/0!	#DIV/0!	#DIV/0!	#DIV/0!	#DIV/0!	#DIV/0!	#DIV/0!	#DIV/0!	#DIV/0!	#DIV/0!	#DIV/0!	#DIV/0!	#DIV/0!	#DIV/0!	#DIV/0!	#DIV/0!	#DIV/0!	#DIV/0!	#DIV/0!	#DIV/0!	#DIV/0!	#DIV/0!	#DIV/0!	#DIV/0!
385	CTX	OLF	MOBipl	228	Main olfactory bulb, inner plexiform layer	#DIV/0!	#DIV/0!	#DIV/0!	#DIV/0!	#DIV/0!	#DIV/0!	#DIV/0!	#DIV/0!	#DIV/0!	#DIV/0!	#DIV/0!	#DIV/0!	#DIV/0!	#DIV/0!	#DIV/0!	#DIV/0!	#DIV/0!	#DIV/0!	#DIV/0!	#DIV/0!	#DIV/0!	#DIV/0!	#DIV/0!	#DIV/0!	#DIV/0!	#DIV/0!	#DIV/0!	#DIV/0!
386	CTX	OLF	MOBmi	236	Main olfactory bulb, mitral layer	#DIV/0!	#DIV/0!	#DIV/0!	#DIV/0!	#DIV/0!	#DIV/0!	#DIV/0!	#DIV/0!	#DIV/0!	#DIV/0!	#DIV/0!	#DIV/0!	#DIV/0!	#DIV/0!	#DIV/0!	#DIV/0!	#DIV/0!	#DIV/0!	#DIV/0!	#DIV/0!	#DIV/0!	#DIV/0!	#DIV/0!	#DIV/0!	#DIV/0!	#DIV/0!	#DIV/0!	#DIV/0!
387	CTX	OLF	MOBopl	244	Main olfactory bulb, outer plexiform layer	#DIV/0!	#DIV/0!	#DIV/0!	#DIV/0!	#DIV/0!	#DIV/0!	#DIV/0!	#DIV/0!	#DIV/0!	#DIV/0!	#DIV/0!	#DIV/0!	#DIV/0!	#DIV/0!	#DIV/0!	#DIV/0!	#DIV/0!	#DIV/0!	#DIV/0!	#DIV/0!	#DIV/0!	#DIV/0!	#DIV/0!	#DIV/0!	#DIV/0!	#DIV/0!	#DIV/0!	#DIV/0!
388	CTX	OLF	AOB	151	Accessory olfactory bulb	#DIV/0!	#DIV/0!	#DIV/0!	#DIV/0!	#DIV/0!	#DIV/0!	#DIV/0!	#DIV/0!	#DIV/0!	#DIV/0!	#DIV/0!	#DIV/0!	#DIV/0!	#DIV/0!	#DIV/0!	#DIV/0!	#DIV/0!	#DIV/0!	#DIV/0!	#DIV/0!	#DIV/0!	#DIV/0!	#DIV/0!	#DIV/0!	#DIV/0!	#DIV/0!	#DIV/0!	#DIV/0!
389	CTX	OLF	AOBgl	188	Accessory olfactory bulb, glomerular layer	0.00454568	0.0145108	0.00868224	0.020366	0.0217184	0.0677507	0.0110819	0.0257504	0.0728103	0.0325668	0.0807438	0.00838984	#DIV/0!	0.00052625	0.000876531	#DIV/0!	0.0100128	0.00263472	0.0021958	0.00696135	0.00332949	0.00167529	0.0158038	0.0152592	0.0120128	0.0249454	0.0203685	0.0204556
390	CTX	OLF	AOBgr	196	Accessory olfactory bulb, granular layer	0.00935533	0.0157719	0.0118671	0.0134305	0.063421	0.0251846	0.0677152	0.0296742	0.0919875	0.0474202	0.110128	0.0951162	#DIV/0!	0.000772168	0.000545268	#DIV/0!	0.00379363	0.00403208	0.00834624	0.00392184	0.00853793	0.00958282	0.00350057	0.0071097	0.00900463	0.013455	0.0078411	0.00574145
391	CTX	OLF	AOBmi	204	Accessory olfactory bulb, mitral layer	0.000719103	0.0178275	0.021785	0.0377083	0.0464308	0.0521605	0.0482085	0.0540192	0.0681751	0.0959991	0.114449	0.0292331	#DIV/0!	0.000193864	0.00040772	#DIV/0!	0.0147218	0.00618072	0.0082791	0.0090947	0.0139804	0.016498	0.0150001	0.00826402	0.0122339	0.038062	0.0175851	0.0174228
392	CTX	OLF	AON	159	Anterior olfactory nucleus	0.0177648	0.0277358	0.02982	0.0326766	0.0631839	0.0580252	0.0856439	0.0556285	0.0880666	0.0914313	0.0810261	0.0849835	0.000103967	0.000337499	0.000214243	0.000271234	0.00999522	0.0113567	0.0131635	0.0139331	0.0127065	0.018701	0.018556	0.0214963	0.0221336	0.0298749	0.0338726	0.0273635
393	CTX	OLF	AONd	167	Anterior olfactory nucleus, dorsal part	#DIV/0!	#DIV/0!	#DIV/0!	#DIV/0!	#DIV/0!	#DIV/0!	#DIV/0!	#DIV/0!	#DIV/0!	#DIV/0!	#DIV/0!	#DIV/0!	#DIV/0!	#DIV/0!	#DIV/0!	#DIV/0!	#DIV/0!	#DIV/0!	#DIV/0!	#DIV/0!	#DIV/0!	#DIV/0!	#DIV/0!	#DIV/0!	#DIV/0!	#DIV/0!	#DIV/0!	#DIV/0!
394	CTX	OLF	AONe	175	Anterior olfactory nucleus, external part	#DIV/0!	#DIV/0!	#DIV/0!	#DIV/0!	#DIV/0!	#DIV/0!	#DIV/0!	#DIV/0!	#DIV/0!	#DIV/0!	#DIV/0!	#DIV/0!	#DIV/0!	#DIV/0!	#DIV/0!	#DIV/0!	#DIV/0!	#DIV/0!	#DIV/0!	#DIV/0!	#DIV/0!	#DIV/0!	#DIV/0!	#DIV/0!	#DIV/0!	#DIV/0!	#DIV/0!	#DIV/0!
395	CTX	OLF	AONl	183	Anterior olfactory nucleus, lateral part	#DIV/0!	#DIV/0!	#DIV/0!	#DIV/0!	#DIV/0!	#DIV/0!	#DIV/0!	#DIV/0!	#DIV/0!	#DIV/0!	#DIV/0!	#DIV/0!	#DIV/0!	#DIV/0!	#DIV/0!	#DIV/0!	#DIV/0!	#DIV/0!	#DIV/0!	#DIV/0!	#DIV/0!	#DIV/0!	#DIV/0!	#DIV/0!	#DIV/0!	#DIV/0!	#DIV/0!	#DIV/0!
396	CTX	OLF	AONm	191	Anterior olfactory nucleus, medial part	#DIV/0!	#DIV/0!	#DIV/0!	#DIV/0!	#DIV/0!	#DIV/0!	#DIV/0!	#DIV/0!	#DIV/0!	#DIV/0!	#DIV/0!	#DIV/0!	#DIV/0!	#DIV/0!	#DIV/0!	#DIV/0!	#DIV/0!	#DIV/0!	#DIV/0!	#DIV/0!	#DIV/0!	#DIV/0!	#DIV/0!	#DIV/0!	#DIV/0!	#DIV/0!	#DIV/0!	#DIV/0!
397	CTX	OLF	AONpv	199	Anterior olfactory nucleus, posteroventral part	#DIV/0!	#DIV/0!	#DIV/0!	#DIV/0!	#DIV/0!	#DIV/0!	#DIV/0!	#DIV/0!	#DIV/0!	#DIV/0!	#DIV/0!	#DIV/0!	#DIV/0!	#DIV/0!	#DIV/0!	#DIV/0!	#DIV/0!	#DIV/0!	#DIV/0!	#DIV/0!	#DIV/0!	#DIV/0!	#DIV/0!	#DIV/0!	#DIV/0!	#DIV/0!	#DIV/0!	#DIV/0!
398	CTX	OLF	AON1	160	Anterior olfactory nucleus, layer 1	#DIV/0!	#DIV/0!	#DIV/0!	#DIV/0!	#DIV/0!	#DIV/0!	#DIV/0!	#DIV/0!	#DIV/0!	#DIV/0!	#DIV/0!	#DIV/0!	#DIV/0!	#DIV/0!	#DIV/0!	#DIV/0!	#DIV/0!	#DIV/0!	#DIV/0!	#DIV/0!	#DIV/0!	#DIV/0!	#DIV/0!	#DIV/0!	#DIV/0!	#DIV/0!	#DIV/0!	#DIV/0!
399	CTX	OLF	AON2	168	Anterior olfactory nucleus, layer 2	#DIV/0!	#DIV/0!	#DIV/0!	#DIV/0!	#DIV/0!	#DIV/0!	#DIV/0!	#DIV/0!	#DIV/0!	#DIV/0!	#DIV/0!	#DIV/0!	#DIV/0!	#DIV/0!	#DIV/0!	#DIV/0!	#DIV/0!	#DIV/0!	#DIV/0!	#DIV/0!	#DIV/0!	#DIV/0!	#DIV/0!	#DIV/0!	#DIV/0!	#DIV/0!	#DIV/0!	#DIV/0!
400	CTX	OLF	TT	589	Taenia tecta	#DIV/0!	#DIV/0!	#DIV/0!	#DIV/0!	#DIV/0!	#DIV/0!	#DIV/0!	#DIV/0!	#DIV/0!	#DIV/0!	#DIV/0!	#DIV/0!	#DIV/0!	#DIV/0!	#DIV/0!	#DIV/0!	#DIV/0!	#DIV/0!	#DIV/0!	#DIV/0!	#DIV/0!	#DIV/0!	#DIV/0!	#DIV/0!	#DIV/0!	#DIV/0!	#DIV/0!	#DIV/0!
401	CTX	OLF	TTd	597	Taenia tecta, dorsal part	0.0402997	0.054298	0.0375539	0.0696799	#DIV/0!	0.0687674	#DIV/0!	#DIV/0!	#DIV/0!	#DIV/0!	0.115784	0.0865154	#DIV/0!	0.000249463	#DIV/0!	0.000524042	0.0194649	0.00938071	#DIV/0!	0.0258771	#DIV/0!	#DIV/0!	0.00948809	0.0294665	0.0107515	0.0427467	0.0649369	0.0362935
402	CTX	OLF	TTd1-4	297	Taenia tecta, dorsal part, layers 1-4	#DIV/0!	#DIV/0!	#DIV/0!	#DIV/0!	#DIV/0!	#DIV/0!	#DIV/0!	#DIV/0!	#DIV/0!	#DIV/0!	#DIV/0!	#DIV/0!	#DIV/0!	#DIV/0!	#DIV/0!	#DIV/0!	#DIV/0!	#DIV/0!	#DIV/0!	#DIV/0!	#DIV/0!	#DIV/0!	#DIV/0!	#DIV/0!	#DIV/0!	#DIV/0!	#DIV/0!	#DIV/0!
403	CTX	OLF	TTd1	1034	Taenia tecta, dorsal part, layer 1	#DIV/0!	#DIV/0!	#DIV/0!	#DIV/0!	#DIV/0!	#DIV/0!	#DIV/0!	#DIV/0!	#DIV/0!	#DIV/0!	#DIV/0!	#DIV/0!	#DIV/0!	#DIV/0!	#DIV/0!	#DIV/0!	#DIV/0!	#DIV/0!	#DIV/0!	#DIV/0!	#DIV/0!	#DIV/0!	#DIV/0!	#DIV/0!	#DIV/0!	#DIV/0!	#DIV/0!	#DIV/0!
404	CTX	OLF	TTd2	1042	Taenia tecta, dorsal part, layer 2	#DIV/0!	#DIV/0!	#DIV/0!	#DIV/0!	#DIV/0!	#DIV/0!	#DIV/0!	#DIV/0!	#DIV/0!	#DIV/0!	#DIV/0!	#DIV/0!	#DIV/0!	#DIV/0!	#DIV/0!	#DIV/0!	#DIV/0!	#DIV/0!	#DIV/0!	#DIV/0!	#DIV/0!	#DIV/0!	#DIV/0!	#DIV/0!	#DIV/0!	#DIV/0!	#DIV/0!	#DIV/0!
405	CTX	OLF	TTd3	1050	Taenia tecta, dorsal part, layer 3	#DIV/0!	#DIV/0!	#DIV/0!	#DIV/0!	#DIV/0!	#DIV/0!	#DIV/0!	#DIV/0!	#DIV/0!	#DIV/0!	#DIV/0!	#DIV/0!	#DIV/0!	#DIV/0!	#DIV/0!	#DIV/0!	#DIV/0!	#DIV/0!	#DIV/0!	#DIV/0!	#DIV/0!	#DIV/0!	#DIV/0!	#DIV/0!	#DIV/0!	#DIV/0!	#DIV/0!	#DIV/0!
406	CTX	OLF	TTd4	1059	Taenia tecta, dorsal part, layer 4	#DIV/0!	#DIV/0!	#DIV/0!	#DIV/0!	#DIV/0!	#DIV/0!	#DIV/0!	#DIV/0!	#DIV/0!	#DIV/0!	#DIV/0!	#DIV/0!	#DIV/0!	#DIV/0!	#DIV/0!	#DIV/0!	#DIV/0!	#DIV/0!	#DIV/0!	#DIV/0!	#DIV/0!	#DIV/0!	#DIV/0!	#DIV/0!	#DIV/0!	#DIV/0!	#DIV/0!	#DIV/0!
407	CTX	OLF	TTv	605	Taenia tecta, ventral part	0.0152582	0.0325224	0.0218799	0.0369994	0.0440954	0.0418073	0.0797424	0.0336299	0.0666147	0.0929765	0.0780496	0.0848372	0.000229174	0.000216316	0.000471863	0.000109217	0.00523681	0.00783447	0.0102718	0.0197082	#DIV/0!	0.00953158	0.0137067	0.0177865	0.0168021	0.0192166	0.0245323	0.0240719
408	CTX	OLF	TTv1-3	306	Taenia tecta, ventral part, layers 1-3	#DIV/0!	#DIV/0!	#DIV/0!	#DIV/0!	#DIV/0!	#DIV/0!	#DIV/0!	#DIV/0!	#DIV/0!	#DIV/0!	#DIV/0!	#DIV/0!	#DIV/0!	#DIV/0!	#DIV/0!	#DIV/0!	#DIV/0!	#DIV/0!	#DIV/0!	#DIV/0!	#DIV/0!	#DIV/0!	#DIV/0!	#DIV/0!	#DIV/0!	#DIV/0!	#DIV/0!	#DIV/0!
409	CTX	OLF	TTv1	1067	Taenia tecta, ventral part, layer 1	#DIV/0!	#DIV/0!	#DIV/0!	#DIV/0!	#DIV/0!	#DIV/0!	#DIV/0!	#DIV/0!	#DIV/0!	#DIV/0!	#DIV/0!	#DIV/0!	#DIV/0!	#DIV/0!	#DIV/0!	#DIV/0!	#DIV/0!	#DIV/0!	#DIV/0!	#DIV/0!	#DIV/0!	#DIV/0!	#DIV/0!	#DIV/0!	#DIV/0!	#DIV/0!	#DIV/0!	#DIV/0!
410	CTX	OLF	TTv2	1075	Taenia tecta, ventral part, layer 2	#DIV/0!	#DIV/0!	#DIV/0!	#DIV/0!	#DIV/0!	#DIV/0!	#DIV/0!	#DIV/0!	#DIV/0!	#DIV/0!	#DIV/0!	#DIV/0!	#DIV/0!	#DIV/0!	#DIV/0!	#DIV/0!	#DIV/0!	#DIV/0!	#DIV/0!	#DIV/0!	#DIV/0!	#DIV/0!	#DIV/0!	#DIV/0!	#DIV/0!	#DIV/0!	#DIV/0!	#DIV/0!
411	CTX	OLF	TTv3	1082	Taenia tecta, ventral part, layer 3	#DIV/0!	#DIV/0!	#DIV/0!	#DIV/0!	#DIV/0!	#DIV/0!	#DIV/0!	#DIV/0!	#DIV/0!	#DIV/0!	#DIV/0!	#DIV/0!	#DIV/0!	#DIV/0!	#DIV/0!	#DIV/0!	#DIV/0!	#DIV/0!	#DIV/0!	#DIV/0!	#DIV/0!	#DIV/0!	#DIV/0!	#DIV/0!	#DIV/0!	#DIV/0!	#DIV/0!	#DIV/0!
412	CTX	OLF	DP	814	Dorsal peduncular area	0.0377496	0.0675003	0.0305752	0.0707558	0.0858057	0.0879458	0.0936455	0.0551508	0.106811	0.0966844	0.108372	0.0949713	0.000123065	0.000866048	0.000822641	0.00173884	0.0214553	0.0188585	0.0303667	0.0205571	#DIV/0!	0.0395912	0.027125	0.0537186	0.0387405	0.0560451	0.0538469	0.0467787
413	CTX	OLF	DP1	496	Dorsal peduncular area, layer 1	#DIV/0!	#DIV/0!	#DIV/0!	#DIV/0!	#DIV/0!	#DIV/0!	#DIV/0!	#DIV/0!	#DIV/0!	#DIV/0!	#DIV/0!	#DIV/0!	#DIV/0!	#DIV/0!	#DIV/0!	#DIV/0!	#DIV/0!	#DIV/0!	#DIV/0!	#DIV/0!	#DIV/0!	#DIV/0!	#DIV/0!	#DIV/0!	#DIV/0!	#DIV/0!	#DIV/0!	#DIV/0!
414	CTX	OLF	DP2	535	Dorsal peduncular area, layer 2	#DIV/0!	#DIV/0!	#DIV/0!	#DIV/0!	#DIV/0!	#DIV/0!	#DIV/0!	#DIV/0!	#DIV/0!	#DIV/0!	#DIV/0!	#DIV/0!	#DIV/0!	#DIV/0!	#DIV/0!	#DIV/0!	#DIV/0!	#DIV/0!	#DIV/0!	#DIV/0!	#DIV/0!	#DIV/0!	#DIV/0!	#DIV/0!	#DIV/0!	#DIV/0!	#DIV/0!	#DIV/0!
415	CTX	OLF	DP2/3	360	Dorsal peduncular area, layer 2/3	#DIV/0!	#DIV/0!	#DIV/0!	#DIV/0!	#DIV/0!	#DIV/0!	#DIV/0!	#DIV/0!	#DIV/0!	#DIV/0!	#DIV/0!	#DIV/0!	#DIV/0!	#DIV/0!	#DIV/0!	#DIV/0!	#DIV/0!	#DIV/0!	#DIV/0!	#DIV/0!	#DIV/0!	#DIV/0!	#DIV/0!	#DIV/0!	#DIV/0!	#DIV/0!	#DIV/0!	#DIV/0!
416	CTX	OLF	DP5	646	Dorsal peduncular area, layer 5	#DIV/0!	#DIV/0!	#DIV/0!	#DIV/0!	#DIV/0!	#DIV/0!	#DIV/0!	#DIV/0!	#DIV/0!	#DIV/0!	#DIV/0!	#DIV/0!	#DIV/0!	#DIV/0!	#DIV/0!	#DIV/0!	#DIV/0!	#DIV/0!	#DIV/0!	#DIV/0!	#DIV/0!	#DIV/0!	#DIV/0!	#DIV/0!	#DIV/0!	#DIV/0!	#DIV/0!	#DIV/0!
417	CTX	OLF	DP6a	267	Dorsal peduncular area, layer 6a	#DIV/0!	#DIV/0!	#DIV/0!	#DIV/0!	#DIV/0!	#DIV/0!	#DIV/0!	#DIV/0!	#DIV/0!	#DIV/0!	#DIV/0!	#DIV/0!	#DIV/0!	#DIV/0!	#DIV/0!	#DIV/0!	#DIV/0!	#DIV/0!	#DIV/0!	#DIV/0!	#DIV/0!	#DIV/0!	#DIV/0!	#DIV/0!	#DIV/0!	#DIV/0!	#DIV/0!	#DIV/0!
418	CTX	OLF	PIR	961	Piriform area	0.0312436	#DIV/0!	#DIV/0!	#DIV/0!	0.0825843	#DIV/0!	0.08993	#DIV/0!	#DIV/0!	#DIV/0!	0.109393	0.0192296	#DIV/0!	#DIV/0!	#DIV/0!	#DIV/0!	#DIV/0!	0.0121571	#DIV/0!	#DIV/0!	0.0156148	0.0253465	#DIV/0!	0.0235127	0.0363024	#DIV/0!	#DIV/0!	#DIV/0!
419	CTX	OLF	PIR1-3	152	Piriform area, layers 1-3	#DIV/0!	#DIV/0!	#DIV/0!	#DIV/0!	#DIV/0!	#DIV/0!	#DIV/0!	#DIV/0!	#DIV/0!	#DIV/0!	#DIV/0!	#DIV/0!	#DIV/0!	#DIV/0!	#DIV/0!	#DIV/0!	#DIV/0!	#DIV/0!	#DIV/0!	#DIV/0!	#DIV/0!	#DIV/0!	#DIV/0!	#DIV/0!	#DIV/0!	#DIV/0!	#DIV/0!	#DIV/0!
420	CTX	OLF	PIR1	276	Piriform area, molecular layer	#DIV/0!	#DIV/0!	#DIV/0!	#DIV/0!	#DIV/0!	#DIV/0!	#DIV/0!	#DIV/0!	#DIV/0!	#DIV/0!	#DIV/0!	#DIV/0!	#DIV/0!	#DIV/0!	#DIV/0!	#DIV/0!	#DIV/0!	#DIV/0!	#DIV/0!	#DIV/0!	#DIV/0!	#DIV/0!	#DIV/0!	#DIV/0!	#DIV/0!	#DIV/0!	#DIV/0!	#DIV/0!
421	CTX	OLF	PIR2	284	Piriform area, pyramidal layer	#DIV/0!	#DIV/0!	#DIV/0!	#DIV/0!	#DIV/0!	#DIV/0!	#DIV/0!	#DIV/0!	#DIV/0!	#DIV/0!	#DIV/0!	#DIV/0!	#DIV/0!	#DIV/0!	#DIV/0!	#DIV/0!	#DIV/0!	#DIV/0!	#DIV/0!	#DIV/0!	#DIV/0!	#DIV/0!	#DIV/0!	#DIV/0!	#DIV/0!	#DIV/0!	#DIV/0!	#DIV/0!
422	CTX	OLF	PIR3	291	Piriform area, polymorph layer	#DIV/0!	#DIV/0!	#DIV/0!	#DIV/0!	#DIV/0!	#DIV/0!	#DIV/0!	#DIV/0!	#DIV/0!	#DIV/0!	#DIV/0!	#DIV/0!	#DIV/0!	#DIV/0!	#DIV/0!	#DIV/0!	#DIV/0!	#DIV/0!	#DIV/0!	#DIV/0!	#DIV/0!	#DIV/0!	#DIV/0!	#DIV/0!	#DIV/0!	#DIV/0!	#DIV/0!	#DIV/0!
423	CTX	OLF	NLOT	619	Nucleus of the lateral olfactory tract	#DIV/0!	#DIV/0!	#DIV/0!	#DIV/0!	#DIV/0!	#DIV/0!	#DIV/0!	#DIV/0!	#DIV/0!	#DIV/0!	#DIV/0!	#DIV/0!	#DIV/0!	#DIV/0!	#DIV/0!	#DIV/0!	#DIV/0!	#DIV/0!	#DIV/0!	#DIV/0!	#DIV/0!	#DIV/0!	#DIV/0!	#DIV/0!	#DIV/0!	#DIV/0!	#DIV/0!	#DIV/0!
424	CTX	OLF	NLOT1-3	392	Nucleus of the lateral olfactory tract, layers 1-3	#DIV/0!	#DIV/0!	#DIV/0!	#DIV/0!	#DIV/0!	#DIV/0!	#DIV/0!	#DIV/0!	#DIV/0!	#DIV/0!	#DIV/0!	#DIV/0!	#DIV/0!	#DIV/0!	#DIV/0!	#DIV/0!	#DIV/0!	#DIV/0!	#DIV/0!	#DIV/0!	#DIV/0!	#DIV/0!	#DIV/0!	#DIV/0!	#DIV/0!	#DIV/0!	#DIV/0!	#DIV/0!
425	CTX	OLF	NLOT1	260	Nucleus of the lateral olfactory tract, molecular layer	#DIV/0!	#DIV/0!	#DIV/0!	#DIV/0!	#DIV/0!	#DIV/0!	#DIV/0!	#DIV/0!	#DIV/0!	#DIV/0!	#DIV/0!	#DIV/0!	#DIV/0!	#DIV/0!	#DIV/0!	#DIV/0!	#DIV/0!	#DIV/0!	#DIV/0!	#DIV/0!	#DIV/0!	#DIV/0!	#DIV/0!	#DIV/0!	#DIV/0!	#DIV/0!	#DIV/0!	#DIV/0!
426	CTX	OLF	NLOT2	268	Nucleus of the lateral olfactory tract, pyramidal layer	#DIV/0!	#DIV/0!	#DIV/0!	#DIV/0!	#DIV/0!	#DIV/0!	#DIV/0!	#DIV/0!	#DIV/0!	#DIV/0!	#DIV/0!	#DIV/0!	#DIV/0!	#DIV/0!	#DIV/0!	#DIV/0!	#DIV/0!	#DIV/0!	#DIV/0!	#DIV/0!	#DIV/0!	#DIV/0!	#DIV/0!	#DIV/0!	#DIV/0!	#DIV/0!	#DIV/0!	#DIV/0!
427	CTX	OLF	NLOT3	1139	Nucleus of the lateral olfactory tract, layer 3	#DIV/0!	#DIV/0!	#DIV/0!	#DIV/0!	#DIV/0!	#DIV/0!	#DIV/0!	#DIV/0!	#DIV/0!	#DIV/0!	#DIV/0!	#DIV/0!	#DIV/0!	#DIV/0!	#DIV/0!	#DIV/0!	#DIV/0!	#DIV/0!	#DIV/0!	#DIV/0!	#DIV/0!	#DIV/0!	#DIV/0!	#DIV/0!	#DIV/0!	#DIV/0!	#DIV/0!	#DIV/0!
428	CTX	OLF	COA	631	Cortical amygdalar area	#DIV/0!	#DIV/0!	#DIV/0!	#DIV/0!	#DIV/0!	#DIV/0!	#DIV/0!	#DIV/0!	#DIV/0!	#DIV/0!	#DIV/0!	#DIV/0!	#DIV/0!	#DIV/0!	#DIV/0!	#DIV/0!	#DIV/0!	#DIV/0!	#DIV/0!	#DIV/0!	#DIV/0!	#DIV/0!	#DIV/0!	#DIV/0!	#DIV/0!	#DIV/0!	#DIV/0!	#DIV/0!
429	CTX	OLF	COAa	639	Cortical amygdalar area, anterior part	#DIV/0!	#DIV/0!	#DIV/0!	#DIV/0!	#DIV/0!	#DIV/0!	#DIV/0!	#DIV/0!	#DIV/0!	#DIV/0!	#DIV/0!	#DIV/0!	#DIV/0!	#DIV/0!	#DIV/0!	#DIV/0!	#DIV/0!	#DIV/0!	#DIV/0!	#DIV/0!	#DIV/0!	#DIV/0!	#DIV/0!	#DIV/0!	#DIV/0!	#DIV/0!	#DIV/0!	#DIV/0!
430	CTX	OLF	COAa1	192	Cortical amygdalar area, anterior part, layer 1	#DIV/0!	#DIV/0!	#DIV/0!	#DIV/0!	#DIV/0!	#DIV/0!	#DIV/0!	#DIV/0!	#DIV/0!	#DIV/0!	#DIV/0!	#DIV/0!	#DIV/0!	#DIV/0!	#DIV/0!	#DIV/0!	#DIV/0!	#DIV/0!	#DIV/0!	#DIV/0!	#DIV/0!	#DIV/0!	#DIV/0!	#DIV/0!	#DIV/0!	#DIV/0!	#DIV/0!	#DIV/0!
431	CTX	OLF	COAa2	200	Cortical amygdalar area, anterior part, layer 2	#DIV/0!	#DIV/0!	#DIV/0!	#DIV/0!	#DIV/0!	#DIV/0!	#DIV/0!	#DIV/0!	#DIV/0!	#DIV/0!	#DIV/0!	#DIV/0!	#DIV/0!	#DIV/0!	#DIV/0!	#DIV/0!	#DIV/0!	#DIV/0!	#DIV/0!	#DIV/0!	#DIV/0!	#DIV/0!	#DIV/0!	#DIV/0!	#DIV/0!	#DIV/0!	#DIV/0!	#DIV/0!
432	CTX	OLF	COAa3	208	Cortical amygdalar area, anterior part, layer 3	#DIV/0!	#DIV/0!	#DIV/0!	#DIV/0!	#DIV/0!	#DIV/0!	#DIV/0!	#DIV/0!	#DIV/0!	#DIV/0!	#DIV/0!	#DIV/0!	#DIV/0!	#DIV/0!	#DIV/0!	#DIV/0!	#DIV/0!	#DIV/0!	#DIV/0!	#DIV/0!	#DIV/0!	#DIV/0!	#DIV/0!	#DIV/0!	#DIV/0!	#DIV/0!	#DIV/0!	#DIV/0!
433	CTX	OLF	COAp	647	Cortical amygdalar area, posterior part	#DIV/0!	#DIV/0!	#DIV/0!	#DIV/0!	#DIV/0!	#DIV/0!	#DIV/0!	#DIV/0!	#DIV/0!	#DIV/0!	#DIV/0!	#DIV/0!	#DIV/0!	#DIV/0!	#DIV/0!	#DIV/0!	#DIV/0!	#DIV/0!	#DIV/0!	#DIV/0!	#DIV/0!	#DIV/0!	#DIV/0!	#DIV/0!	#DIV/0!	#DIV/0!	#DIV/0!	#DIV/0!
434	CTX	OLF	COApl	655	Cortical amygdalar area, posterior part, lateral zone	#DIV/0!	#DIV/0!	#DIV/0!	#DIV/0!	#DIV/0!	#DIV/0!	#DIV/0!	#DIV/0!	#DIV/0!	#DIV/0!	#DIV/0!	#DIV/0!	#DIV/0!	#DIV/0!	#DIV/0!	#DIV/0!	#DIV/0!	#DIV/0!	#DIV/0!	#DIV/0!	#DIV/0!	#DIV/0!	#DIV/0!	#DIV/0!	#DIV/0!	#DIV/0!	#DIV/0!	#DIV/0!
435	CTX	OLF	COApl1-2	584	Cortical amygdalar area, posterior part, lateral zone, layers 1-2	#DIV/0!	#DIV/0!	#DIV/0!	#DIV/0!	#DIV/0!	#DIV/0!	#DIV/0!	#DIV/0!	#DIV/0!	#DIV/0!	#DIV/0!	#DIV/0!	#DIV/0!	#DIV/0!	#DIV/0!	#DIV/0!	#DIV/0!	#DIV/0!	#DIV/0!	#DIV/0!	#DIV/0!	#DIV/0!	#DIV/0!	#DIV/0!	#DIV/0!	#DIV/0!	#DIV/0!	#DIV/0!
436	CTX	OLF	COApl1-3	376	Cortical amygdalar area, posterior part, lateral zone, layers 1-3	#DIV/0!	#DIV/0!	#DIV/0!	#DIV/0!	#DIV/0!	#DIV/0!	#DIV/0!	#DIV/0!	#DIV/0!	#DIV/0!	#DIV/0!	#DIV/0!	#DIV/0!	#DIV/0!	#DIV/0!	#DIV/0!	#DIV/0!	#DIV/0!	#DIV/0!	#DIV/0!	#DIV/0!	#DIV/0!	#DIV/0!	#DIV/0!	#DIV/0!	#DIV/0!	#DIV/0!	#DIV/0!
437	CTX	OLF	COApl1	216	Cortical amygdalar area, posterior part, lateral zone, layer 1	#DIV/0!	#DIV/0!	#DIV/0!	#DIV/0!	#DIV/0!	#DIV/0!	#DIV/0!	#DIV/0!	#DIV/0!	#DIV/0!	#DIV/0!	#DIV/0!	#DIV/0!	#DIV/0!	#DIV/0!	#DIV/0!	#DIV/0!	#DIV/0!	#DIV/0!	#DIV/0!	#DIV/0!	#DIV/0!	#DIV/0!	#DIV/0!	#DIV/0!	#DIV/0!	#DIV/0!	#DIV/0!
438	CTX	OLF	COApl2	224	Cortical amygdalar area, posterior part, lateral zone, layer 2	#DIV/0!	#DIV/0!	#DIV/0!	#DIV/0!	#DIV/0!	#DIV/0!	#DIV/0!	#DIV/0!	#DIV/0!	#DIV/0!	#DIV/0!	#DIV/0!	#DIV/0!	#DIV/0!	#DIV/0!	#DIV/0!	#DIV/0!	#DIV/0!	#DIV/0!	#DIV/0!	#DIV/0!	#DIV/0!	#DIV/0!	#DIV/0!	#DIV/0!	#DIV/0!	#DIV/0!	#DIV/0!
439	CTX	OLF	COApl3	232	Cortical amygdalar area, posterior part, lateral zone, layer 3	#DIV/0!	#DIV/0!	#DIV/0!	#DIV/0!	#DIV/0!	#DIV/0!	#DIV/0!	#DIV/0!	#DIV/0!	#DIV/0!	#DIV/0!	#DIV/0!	#DIV/0!	#DIV/0!	#DIV/0!	#DIV/0!	#DIV/0!	#DIV/0!	#DIV/0!	#DIV/0!	#DIV/0!	#DIV/0!	#DIV/0!	#DIV/0!	#DIV/0!	#DIV/0!	#DIV/0!	#DIV/0!
440	CTX	OLF	COApm	663	Cortical amygdalar area, posterior part, medial zone	#DIV/0!	#DIV/0!	#DIV/0!	#DIV/0!	#DIV/0!	#DIV/0!	#DIV/0!	#DIV/0!	#DIV/0!	#DIV/0!	#DIV/0!	#DIV/0!	#DIV/0!	#DIV/0!	#DIV/0!	#DIV/0!	#DIV/0!	#DIV/0!	#DIV/0!	#DIV/0!	#DIV/0!	#DIV/0!	#DIV/0!	#DIV/0!	#DIV/0!	#DIV/0!	#DIV/0!	#DIV/0!
441	CTX	OLF	COApm1-2	592	Cortical amygdalar area, posterior part, medial zone, layers 1-2	#DIV/0!	#DIV/0!	#DIV/0!	#DIV/0!	#DIV/0!	#DIV/0!	#DIV/0!	#DIV/0!	#DIV/0!	#DIV/0!	#DIV/0!	#DIV/0!	#DIV/0!	#DIV/0!	#DIV/0!	#DIV/0!	#DIV/0!	#DIV/0!	#DIV/0!	#DIV/0!	#DIV/0!	#DIV/0!	#DIV/0!	#DIV/0!	#DIV/0!	#DIV/0!	#DIV/0!	#DIV/0!
442	CTX	OLF	COApm1-3	383	Cortical amygdalar area, posterior part, medial zone, layers 1-3	#DIV/0!	#DIV/0!	#DIV/0!	#DIV/0!	#DIV/0!	#DIV/0!	#DIV/0!	#DIV/0!	#DIV/0!	#DIV/0!	#DIV/0!	#DIV/0!	#DIV/0!	#DIV/0!	#DIV/0!	#DIV/0!	#DIV/0!	#DIV/0!	#DIV/0!	#DIV/0!	#DIV/0!	#DIV/0!	#DIV/0!	#DIV/0!	#DIV/0!	#DIV/0!	#DIV/0!	#DIV/0!
443	CTX	OLF	COApm1	240	Cortical amygdalar area, posterior part, medial zone, layer 1	#DIV/0!	#DIV/0!	#DIV/0!	#DIV/0!	#DIV/0!	#DIV/0!	#DIV/0!	#DIV/0!	#DIV/0!	#DIV/0!	#DIV/0!	#DIV/0!	#DIV/0!	#DIV/0!	#DIV/0!	#DIV/0!	#DIV/0!	#DIV/0!	#DIV/0!	#DIV/0!	#DIV/0!	#DIV/0!	#DIV/0!	#DIV/0!	#DIV/0!	#DIV/0!	#DIV/0!	#DIV/0!
444	CTX	OLF	COApm2	248	Cortical amygdalar area, posterior part, medial zone, layer 2	#DIV/0!	#DIV/0!	#DIV/0!	#DIV/0!	#DIV/0!	#DIV/0!	#DIV/0!	#DIV/0!	#DIV/0!	#DIV/0!	#DIV/0!	#DIV/0!	#DIV/0!	#DIV/0!	#DIV/0!	#DIV/0!	#DIV/0!	#DIV/0!	#DIV/0!	#DIV/0!	#DIV/0!	#DIV/0!	#DIV/0!	#DIV/0!	#DIV/0!	#DIV/0!	#DIV/0!	#DIV/0!
445	CTX	OLF	COApm3	256	Cortical amygdalar area, posterior part, medial zone, layer 3	#DIV/0!	#DIV/0!	#DIV/0!	#DIV/0!	#DIV/0!	#DIV/0!	#DIV/0!	#DIV/0!	#DIV/0!	#DIV/0!	#DIV/0!	#DIV/0!	#DIV/0!	#DIV/0!	#DIV/0!	#DIV/0!	#DIV/0!	#DIV/0!	#DIV/0!	#DIV/0!	#DIV/0!	#DIV/0!	#DIV/0!	#DIV/0!	#DIV/0!	#DIV/0!	#DIV/0!	#DIV/0!
446	CTX	OLF	PAA	788	Piriform-amygdalar area	#DIV/0!	#DIV/0!	#DIV/0!	#DIV/0!	#DIV/0!	#DIV/0!	#DIV/0!	#DIV/0!	#DIV/0!	#DIV/0!	#DIV/0!	#DIV/0!	#DIV/0!	#DIV/0!	#DIV/0!	#DIV/0!	#DIV/0!	#DIV/0!	#DIV/0!	#DIV/0!	#DIV/0!	#DIV/0!	#DIV/0!	#DIV/0!	#DIV/0!	#DIV/0!	#DIV/0!	#DIV/0!
447	CTX	OLF	PAA1-3	400	Piriform-amygdalar area, layers 1-3	#DIV/0!	#DIV/0!	#DIV/0!	#DIV/0!	#DIV/0!	#DIV/0!	#DIV/0!	#DIV/0!	#DIV/0!	#DIV/0!	#DIV/0!	#DIV/0!	#DIV/0!	#DIV/0!	#DIV/0!	#DIV/0!	#DIV/0!	#DIV/0!	#DIV/0!	#DIV/0!	#DIV/0!	#DIV/0!	#DIV/0!	#DIV/0!	#DIV/0!	#DIV/0!	#DIV/0!	#DIV/0!
448	CTX	OLF	PAA1	408	Piriform-amygdalar area, molecular layer	#DIV/0!	#DIV/0!	#DIV/0!	#DIV/0!	#DIV/0!	#DIV/0!	#DIV/0!	#DIV/0!	#DIV/0!	#DIV/0!	#DIV/0!	#DIV/0!	#DIV/0!	#DIV/0!	#DIV/0!	#DIV/0!	#DIV/0!	#DIV/0!	#DIV/0!	#DIV/0!	#DIV/0!	#DIV/0!	#DIV/0!	#DIV/0!	#DIV/0!	#DIV/0!	#DIV/0!	#DIV/0!
449	CTX	OLF	PAA2	416	Piriform-amygdalar area, pyramidal layer	#DIV/0!	#DIV/0!	#DIV/0!	#DIV/0!	#DIV/0!	#DIV/0!	#DIV/0!	#DIV/0!	#DIV/0!	#DIV/0!	#DIV/0!	#DIV/0!	#DIV/0!	#DIV/0!	#DIV/0!	#DIV/0!	#DIV/0!	#DIV/0!	#DIV/0!	#DIV/0!	#DIV/0!	#DIV/0!	#DIV/0!	#DIV/0!	#DIV/0!	#DIV/0!	#DIV/0!	#DIV/0!
450	CTX	OLF	PAA3	424	Piriform-amygdalar area, polymorph layer	#DIV/0!	#DIV/0!	#DIV/0!	#DIV/0!	#DIV/0!	#DIV/0!	#DIV/0!	#DIV/0!	#DIV/0!	#DIV/0!	#DIV/0!	#DIV/0!	#DIV/0!	#DIV/0!	#DIV/0!	#DIV/0!	#DIV/0!	#DIV/0!	#DIV/0!	#DIV/0!	#DIV/0!	#DIV/0!	#DIV/0!	#DIV/0!	#DIV/0!	#DIV/0!	#DIV/0!	#DIV/0!
451	CTX	OLF	TR	566	Postpiriform transition area	#DIV/0!	#DIV/0!	#DIV/0!	#DIV/0!	#DIV/0!	#DIV/0!	#DIV/0!	#DIV/0!	#DIV/0!	#DIV/0!	#DIV/0!	#DIV/0!	#DIV/0!	#DIV/0!	#DIV/0!	#DIV/0!	#DIV/0!	#DIV/0!	#DIV/0!	#DIV/0!	#DIV/0!	#DIV/0!	#DIV/0!	#DIV/0!	#DIV/0!	#DIV/0!	#DIV/0!	#DIV/0!
452	CTX	OLF	TR1-3	517	Postpiriform transition area, layers 1-3	#DIV/0!	#DIV/0!	#DIV/0!	#DIV/0!	#DIV/0!	#DIV/0!	#DIV/0!	#DIV/0!	#DIV/0!	#DIV/0!	#DIV/0!	#DIV/0!	#DIV/0!	#DIV/0!	#DIV/0!	#DIV/0!	#DIV/0!	#DIV/0!	#DIV/0!	#DIV/0!	#DIV/0!	#DIV/0!	#DIV/0!	#DIV/0!	#DIV/0!	#DIV/0!	#DIV/0!	#DIV/0!
453	CTX	OLF	TR1	1140	Postpiriform transition area, layers 1	#DIV/0!	#DIV/0!	#DIV/0!	#DIV/0!	#DIV/0!	#DIV/0!	#DIV/0!	#DIV/0!	#DIV/0!	#DIV/0!	#DIV/0!	#DIV/0!	#DIV/0!	#DIV/0!	#DIV/0!	#DIV/0!	#DIV/0!	#DIV/0!	#DIV/0!	#DIV/0!	#DIV/0!	#DIV/0!	#DIV/0!	#DIV/0!	#DIV/0!	#DIV/0!	#DIV/0!	#DIV/0!
454	CTX	OLF	TR2	1141	Postpiriform transition area, layers 2	#DIV/0!	#DIV/0!	#DIV/0!	#DIV/0!	#DIV/0!	#DIV/0!	#DIV/0!	#DIV/0!	#DIV/0!	#DIV/0!	#DIV/0!	#DIV/0!	#DIV/0!	#DIV/0!	#DIV/0!	#DIV/0!	#DIV/0!	#DIV/0!	#DIV/0!	#DIV/0!	#DIV/0!	#DIV/0!	#DIV/0!	#DIV/0!	#DIV/0!	#DIV/0!	#DIV/0!	#DIV/0!
455	CTX	OLF	TR3	1142	Postpiriform transition area, layers 3	#DIV/0!	#DIV/0!	#DIV/0!	#DIV/0!	#DIV/0!	#DIV/0!	#DIV/0!	#DIV/0!	#DIV/0!	#DIV/0!	#DIV/0!	#DIV/0!	#DIV/0!	#DIV/0!	#DIV/0!	#DIV/0!	#DIV/0!	#DIV/0!	#DIV/0!	#DIV/0!	#DIV/0!	#DIV/0!	#DIV/0!	#DIV/0!	#DIV/0!	#DIV/0!	#DIV/0!	#DIV/0!
456	HPF	HPF	HPF	1089	Hippocampal formation	0.0279346	0.0385096	0.0332948	0.022229	0.0546146	0.0654422	0.062781	0.0436487	0.0737606	0.075107	0.0729511	0.0778055	0.00817181	#DIV/0!	0.00353337	0.00651494	0.0113903	0.00421359	0.00804052	0.0118589	0.00642862	0.00942597	0.0185929	0.0190844	0.0272803	0.0260909	0.017826	0.0204066
457	HPF	HIP	HIP	1080	Hippocampal region	#DIV/0!	#DIV/0!	#DIV/0!	#DIV/0!	#DIV/0!	#DIV/0!	#DIV/0!	#DIV/0!	#DIV/0!	#DIV/0!	#DIV/0!	#DIV/0!	#DIV/0!	#DIV/0!	#DIV/0!	#DIV/0!	#DIV/0!	#DIV/0!	#DIV/0!	#DIV/0!	#DIV/0!	#DIV/0!	#DIV/0!	#DIV/0!	#DIV/0!	#DIV/0!	#DIV/0!	#DIV/0!
458	HPF	CA	CA	375	Ammon's horn	#DIV/0!	#DIV/0!	#DIV/0!	#DIV/0!	#DIV/0!	#DIV/0!	#DIV/0!	#DIV/0!	#DIV/0!	#DIV/0!	#DIV/0!	#DIV/0!	#DIV/0!	#DIV/0!	#DIV/0!	#DIV/0!	#DIV/0!	#DIV/0!	#DIV/0!	#DIV/0!	#DIV/0!	#DIV/0!	#DIV/0!	#DIV/0!	#DIV/0!	#DIV/0!	#DIV/0!	#DIV/0!
459	HPF	CA	CA1	382	Field CA1	0.0247748	0.0261309	0.0239381	0.0323608	0.0454829	0.0453361	0.0439592	0.0362309	0.0610016	0.0663935	0.050598	0.060243	0.000299254	0.000166362	0.000396615	0.000172791	0.00487849	0.0049899	0.00522007	0.00864875	0.00816926	0.0113912	0.00865042	0.0144173	0.017925	0.0236153	0.0169104	0.0156109
460	HPF	CA	CA1slm	391	Field CA1, stratum lacunosum-moleculare	#DIV/0!	#DIV/0!	#DIV/0!	#DIV/0!	#DIV/0!	#DIV/0!	#DIV/0!	#DIV/0!	#DIV/0!	#DIV/0!	#DIV/0!	#DIV/0!	#DIV/0!	#DIV/0!	#DIV/0!	#DIV/0!	#DIV/0!	#DIV/0!	#DIV/0!	#DIV/0!	#DIV/0!	#DIV/0!	#DIV/0!	#DIV/0!	#DIV/0!	#DIV/0!	#DIV/0!	#DIV/0!
461	HPF	CA	CA1so	399	Field CA1, stratum oriens	#DIV/0!	#DIV/0!	#DIV/0!	#DIV/0!	#DIV/0!	#DIV/0!	#DIV/0!	#DIV/0!	#DIV/0!	#DIV/0!	#DIV/0!	#DIV/0!	#DIV/0!	#DIV/0!	#DIV/0!	#DIV/0!	#DIV/0!	#DIV/0!	#DIV/0!	#DIV/0!	#DIV/0!	#DIV/0!	#DIV/0!	#DIV/0!	#DIV/0!	#DIV/0!	#DIV/0!	#DIV/0!
462	HPF	CA	CA1sp	407	Field CA1, pyramidal layer	#DIV/0!	#DIV/0!	#DIV/0!	#DIV/0!	#DIV/0!	#DIV/0!	#DIV/0!	#DIV/0!	#DIV/0!	#DIV/0!	#DIV/0!	#DIV/0!	#DIV/0!	#DIV/0!	#DIV/0!	#DIV/0!	#DIV/0!	#DIV/0!	#DIV/0!	#DIV/0!	#DIV/0!	#DIV/0!	#DIV/0!	#DIV/0!	#DIV/0!	#DIV/0!	#DIV/0!	#DIV/0!
463	HPF	CA	CA1sr	415	Field CA1, stratum radiatum	#DIV/0!	#DIV/0!	#DIV/0!	#DIV/0!	#DIV/0!	#DIV/0!	#DIV/0!	#DIV/0!	#DIV/0!	#DIV/0!	#DIV/0!	#DIV/0!	#DIV/0!	#DIV/0!	#DIV/0!	#DIV/0!	#DIV/0!	#DIV/0!	#DIV/0!	#DIV/0!	#DIV/0!	#DIV/0!	#DIV/0!	#DIV/0!	#DIV/0!	#DIV/0!	#DIV/0!	#DIV/0!
464	HPF	CA	CA2	423	Field CA2	0.0244043	0.0311826	0.0296291	0.0477318	0.0564781	0.0555137	0.0478009	0.044009	0.061993	0.0744293	0.0524162	0.0509395	0.00231703	#DIV/0!	8.71364e-05	0.00150386	0.0138962	0.0170155	0.0190359	0.0116862	0.017496	0.0291537	0.0235128	0.0232359	0.0316307	0.0378405	0.0295833	0.021707
465	HPF	CA	CA2slm	431	Field CA2, stratum lacunosum-moleculare	#DIV/0!	#DIV/0!	#DIV/0!	#DIV/0!	#DIV/0!	#DIV/0!	#DIV/0!	#DIV/0!	#DIV/0!	#DIV/0!	#DIV/0!	#DIV/0!	#DIV/0!	#DIV/0!	#DIV/0!	#DIV/0!	#DIV/0!	#DIV/0!	#DIV/0!	#DIV/0!	#DIV/0!	#DIV/0!	#DIV/0!	#DIV/0!	#DIV/0!	#DIV/0!	#DIV/0!	#DIV/0!
466	HPF	CA	CA2so	438	Field CA2, stratum oriens	#DIV/0!	#DIV/0!	#DIV/0!	#DIV/0!	#DIV/0!	#DIV/0!	#DIV/0!	#DIV/0!	#DIV/0!	#DIV/0!	#DIV/0!	#DIV/0!	#DIV/0!	#DIV/0!	#DIV/0!	#DIV/0!	#DIV/0!	#DIV/0!	#DIV/0!	#DIV/0!	#DIV/0!	#DIV/0!	#DIV/0!	#DIV/0!	#DIV/0!	#DIV/0!	#DIV/0!	#DIV/0!
467	HPF	CA	CA2sp	446	Field CA2, pyramidal layer	#DIV/0!	#DIV/0!	#DIV/0!	#DIV/0!	#DIV/0!	#DIV/0!	#DIV/0!	#DIV/0!	#DIV/0!	#DIV/0!	#DIV/0!	#DIV/0!	#DIV/0!	#DIV/0!	#DIV/0!	#DIV/0!	#DIV/0!	#DIV/0!	#DIV/0!	#DIV/0!	#DIV/0!	#DIV/0!	#DIV/0!	#DIV/0!	#DIV/0!	#DIV/0!	#DIV/0!	#DIV/0!
468	HPF	CA	CA2sr	454	Field CA2, stratum radiatum	#DIV/0!	#DIV/0!	#DIV/0!	#DIV/0!	#DIV/0!	#DIV/0!	#DIV/0!	#DIV/0!	#DIV/0!	#DIV/0!	#DIV/0!	#DIV/0!	#DIV/0!	#DIV/0!	#DIV/0!	#DIV/0!	#DIV/0!	#DIV/0!	#DIV/0!	#DIV/0!	#DIV/0!	#DIV/0!	#DIV/0!	#DIV/0!	#DIV/0!	#DIV/0!	#DIV/0!	#DIV/0!
469	HPF	CA	CA3	463	Field CA3	0.037684	0.0438724	0.0390343	0.0527435	0.06121	0.0644915	0.059188	0.0512601	0.070769	0.0651918	0.0563332	0.0736628	0.00018744	0.000171702	0.000311496	0.000368293	0.015857	0.0151446	0.0220628	0.015634	0.0245963	0.0308189	0.0304886	0.0290289	0.0331801	0.0376256	0.0323394	0.0339302
470	HPF	CA	CA3slm	471	Field CA3, stratum lacunosum-moleculare	#DIV/0!	#DIV/0!	#DIV/0!	#DIV/0!	#DIV/0!	#DIV/0!	#DIV/0!	#DIV/0!	#DIV/0!	#DIV/0!	#DIV/0!	#DIV/0!	#DIV/0!	#DIV/0!	#DIV/0!	#DIV/0!	#DIV/0!	#DIV/0!	#DIV/0!	#DIV/0!	#DIV/0!	#DIV/0!	#DIV/0!	#DIV/0!	#DIV/0!	#DIV/0!	#DIV/0!	#DIV/0!
471	HPF	CA	CA3slu	479	Field CA3, stratum lucidum	#DIV/0!	#DIV/0!	#DIV/0!	#DIV/0!	#DIV/0!	#DIV/0!	#DIV/0!	#DIV/0!	#DIV/0!	#DIV/0!	#DIV/0!	#DIV/0!	#DIV/0!	#DIV/0!	#DIV/0!	#DIV/0!	#DIV/0!	#DIV/0!	#DIV/0!	#DIV/0!	#DIV/0!	#DIV/0!	#DIV/0!	#DIV/0!	#DIV/0!	#DIV/0!	#DIV/0!	#DIV/0!
472	HPF	CA	CA3so	486	Field CA3, stratum oriens	#DIV/0!	#DIV/0!	#DIV/0!	#DIV/0!	#DIV/0!	#DIV/0!	#DIV/0!	#DIV/0!	#DIV/0!	#DIV/0!	#DIV/0!	#DIV/0!	#DIV/0!	#DIV/0!	#DIV/0!	#DIV/0!	#DIV/0!	#DIV/0!	#DIV/0!	#DIV/0!	#DIV/0!	#DIV/0!	#DIV/0!	#DIV/0!	#DIV/0!	#DIV/0!	#DIV/0!	#DIV/0!
473	HPF	CA	CA3sp	495	Field CA3, pyramidal layer	#DIV/0!	#DIV/0!	#DIV/0!	#DIV/0!	#DIV/0!	#DIV/0!	#DIV/0!	#DIV/0!	#DIV/0!	#DIV/0!	#DIV/0!	#DIV/0!	#DIV/0!	#DIV/0!	#DIV/0!	#DIV/0!	#DIV/0!	#DIV/0!	#DIV/0!	#DIV/0!	#DIV/0!	#DIV/0!	#DIV/0!	#DIV/0!	#DIV/0!	#DIV/0!	#DIV/0!	#DIV/0!
474	HPF	CA	CA3sr	504	Field CA3, stratum radiatum	#DIV/0!	#DIV/0!	#DIV/0!	#DIV/0!	#DIV/0!	#DIV/0!	#DIV/0!	#DIV/0!	#DIV/0!	#DIV/0!	#DIV/0!	#DIV/0!	#DIV/0!	#DIV/0!	#DIV/0!	#DIV/0!	#DIV/0!	#DIV/0!	#DIV/0!	#DIV/0!	#DIV/0!	#DIV/0!	#DIV/0!	#DIV/0!	#DIV/0!	#DIV/0!	#DIV/0!	#DIV/0!
475	HPF	DG	DG	726	Dentate gyrus	#DIV/0!	#DIV/0!	#DIV/0!	#DIV/0!	#DIV/0!	#DIV/0!	#DIV/0!	#DIV/0!	#DIV/0!	#DIV/0!	#DIV/0!	#DIV/0!	#DIV/0!	#DIV/0!	#DIV/0!	#DIV/0!	#DIV/0!	#DIV/0!	#DIV/0!	#DIV/0!	#DIV/0!	#DIV/0!	#DIV/0!	#DIV/0!	#DIV/0!	#DIV/0!	#DIV/0!	#DIV/0!
476	HPF	DG	DG-mo	10703	Dentate gyrus, molecular layer	0.00597544	0.0101542	0.00849647	0.0133208	0.0276222	0.0254414	0.0322537	0.0167552	0.111879	0.0423124	0.0312234	0.0490646	0.00031803	0.000388314	0.000743989	0.000287014	0.00222174	0.00277837	0.00225633	0.0025282	0.00368561	0.00449567	0.00392664	0.00418151	0.00480279	0.00565196	0.0056948	0.00662612
477	HPF	DG	DG-po	10704	Dentate gyrus, polymorph layer	0.021675	0.0399447	0.0326339	0.0461242	0.0662164	0.105047	0.0682154	0.0543868	0.0706777	0.0578685	0.0452242	0.065013	0.00119368	0.00120651	0.00118406	0.000793539	0.00874976	0.0116603	0.0140014	0.011526	0.0159202	0.0171923	0.0770004	0.0196528	0.0243619	0.0280568	0.017698	0.0257521
478	HPF	DG	DG-sg	632	Dentate gyrus, granule cell layer	0.0233651	0.0275526	0.0265137	0.0649597	0.120785	0.10786	0.126106	0.112195	0.161326	0.155269	0.165169	0.168927	0.000426179	0.000187761	0.000920539	0.000733716	0.00528068	0.00512386	0.00397421	0.00640451	0.00520662	0.00616315	0.00675243	0.0101793	0.00980262	0.0142823	0.00883159	0.01245
479	HPF	DG	DG-sgz	10702	Dentate gyrus, subgranular zone	#DIV/0!	#DIV/0!	#DIV/0!	#DIV/0!	#DIV/0!	#DIV/0!	#DIV/0!	#DIV/0!	#DIV/0!	#DIV/0!	#DIV/0!	#DIV/0!	#DIV/0!	#DIV/0!	#DIV/0!	#DIV/0!	#DIV/0!	#DIV/0!	#DIV/0!	#DIV/0!	#DIV/0!	#DIV/0!	#DIV/0!	#DIV/0!	#DIV/0!	#DIV/0!	#DIV/0!	#DIV/0!
480	HPF	DG	DGcr	734	Dentate gyrus crest	#DIV/0!	#DIV/0!	#DIV/0!	#DIV/0!	#DIV/0!	#DIV/0!	#DIV/0!	#DIV/0!	#DIV/0!	#DIV/0!	#DIV/0!	#DIV/0!	#DIV/0!	#DIV/0!	#DIV/0!	#DIV/0!	#DIV/0!	#DIV/0!	#DIV/0!	#DIV/0!	#DIV/0!	#DIV/0!	#DIV/0!	#DIV/0!	#DIV/0!	#DIV/0!	#DIV/0!	#DIV/0!
481	HPF	DG	DGcr-mo	742	Dentate gyrus crest, molecular layer	#DIV/0!	#DIV/0!	#DIV/0!	#DIV/0!	#DIV/0!	#DIV/0!	#DIV/0!	#DIV/0!	#DIV/0!	#DIV/0!	#DIV/0!	#DIV/0!	#DIV/0!	#DIV/0!	#DIV/0!	#DIV/0!	#DIV/0!	#DIV/0!	#DIV/0!	#DIV/0!	#DIV/0!	#DIV/0!	#DIV/0!	#DIV/0!	#DIV/0!	#DIV/0!	#DIV/0!	#DIV/0!
482	HPF	DG	DGcr-po	751	Dentate gyrus crest, polymorph layer	#DIV/0!	#DIV/0!	#DIV/0!	#DIV/0!	#DIV/0!	#DIV/0!	#DIV/0!	#DIV/0!	#DIV/0!	#DIV/0!	#DIV/0!	#DIV/0!	#DIV/0!	#DIV/0!	#DIV/0!	#DIV/0!	#DIV/0!	#DIV/0!	#DIV/0!	#DIV/0!	#DIV/0!	#DIV/0!	#DIV/0!	#DIV/0!	#DIV/0!	#DIV/0!	#DIV/0!	#DIV/0!
483	HPF	DG	DGcr-sg	758	Dentate gyrus crest, granule cell layer	#DIV/0!	#DIV/0!	#DIV/0!	#DIV/0!	#DIV/0!	#DIV/0!	#DIV/0!	#DIV/0!	#DIV/0!	#DIV/0!	#DIV/0!	#DIV/0!	#DIV/0!	#DIV/0!	#DIV/0!	#DIV/0!	#DIV/0!	#DIV/0!	#DIV/0!	#DIV/0!	#DIV/0!	#DIV/0!	#DIV/0!	#DIV/0!	#DIV/0!	#DIV/0!	#DIV/0!	#DIV/0!
484	HPF	DG	DGlb	766	Dentate gyrus lateral blade	#DIV/0!	#DIV/0!	#DIV/0!	#DIV/0!	#DIV/0!	#DIV/0!	#DIV/0!	#DIV/0!	#DIV/0!	#DIV/0!	#DIV/0!	#DIV/0!	#DIV/0!	#DIV/0!	#DIV/0!	#DIV/0!	#DIV/0!	#DIV/0!	#DIV/0!	#DIV/0!	#DIV/0!	#DIV/0!	#DIV/0!	#DIV/0!	#DIV/0!	#DIV/0!	#DIV/0!	#DIV/0!
485	HPF	DG	DGlb-mo	775	Dentate gyrus lateral blade, molecular layer	#DIV/0!	#DIV/0!	#DIV/0!	#DIV/0!	#DIV/0!	#DIV/0!	#DIV/0!	#DIV/0!	#DIV/0!	#DIV/0!	#DIV/0!	#DIV/0!	#DIV/0!	#DIV/0!	#DIV/0!	#DIV/0!	#DIV/0!	#DIV/0!	#DIV/0!	#DIV/0!	#DIV/0!	#DIV/0!	#DIV/0!	#DIV/0!	#DIV/0!	#DIV/0!	#DIV/0!	#DIV/0!
486	HPF	DG	DGlb-po	782	Dentate gyrus lateral blade, polymorph layer	#DIV/0!	#DIV/0!	#DIV/0!	#DIV/0!	#DIV/0!	#DIV/0!	#DIV/0!	#DIV/0!	#DIV/0!	#DIV/0!	#DIV/0!	#DIV/0!	#DIV/0!	#DIV/0!	#DIV/0!	#DIV/0!	#DIV/0!	#DIV/0!	#DIV/0!	#DIV/0!	#DIV/0!	#DIV/0!	#DIV/0!	#DIV/0!	#DIV/0!	#DIV/0!	#DIV/0!	#DIV/0!
487	HPF	DG	DGlb-sg	790	Dentate gyrus lateral blade, granule cell layer	#DIV/0!	#DIV/0!	#DIV/0!	#DIV/0!	#DIV/0!	#DIV/0!	#DIV/0!	#DIV/0!	#DIV/0!	#DIV/0!	#DIV/0!	#DIV/0!	#DIV/0!	#DIV/0!	#DIV/0!	#DIV/0!	#DIV/0!	#DIV/0!	#DIV/0!	#DIV/0!	#DIV/0!	#DIV/0!	#DIV/0!	#DIV/0!	#DIV/0!	#DIV/0!	#DIV/0!	#DIV/0!
488	HPF	DG	DGmb	799	Dentate gyrus medial blade	#DIV/0!	#DIV/0!	#DIV/0!	#DIV/0!	#DIV/0!	#DIV/0!	#DIV/0!	#DIV/0!	#DIV/0!	#DIV/0!	#DIV/0!	#DIV/0!	#DIV/0!	#DIV/0!	#DIV/0!	#DIV/0!	#DIV/0!	#DIV/0!	#DIV/0!	#DIV/0!	#DIV/0!	#DIV/0!	#DIV/0!	#DIV/0!	#DIV/0!	#DIV/0!	#DIV/0!	#DIV/0!
489	HPF	DG	DGmb-mo	807	Dentate gyrus medial blade, molecular layer	#DIV/0!	#DIV/0!	#DIV/0!	#DIV/0!	#DIV/0!	#DIV/0!	#DIV/0!	#DIV/0!	#DIV/0!	#DIV/0!	#DIV/0!	#DIV/0!	#DIV/0!	#DIV/0!	#DIV/0!	#DIV/0!	#DIV/0!	#DIV/0!	#DIV/0!	#DIV/0!	#DIV/0!	#DIV/0!	#DIV/0!	#DIV/0!	#DIV/0!	#DIV/0!	#DIV/0!	#DIV/0!
490	HPF	DG	DGmb-po	815	Dentate gyrus medial blade, polymorph layer	#DIV/0!	#DIV/0!	#DIV/0!	#DIV/0!	#DIV/0!	#DIV/0!	#DIV/0!	#DIV/0!	#DIV/0!	#DIV/0!	#DIV/0!	#DIV/0!	#DIV/0!	#DIV/0!	#DIV/0!	#DIV/0!	#DIV/0!	#DIV/0!	#DIV/0!	#DIV/0!	#DIV/0!	#DIV/0!	#DIV/0!	#DIV/0!	#DIV/0!	#DIV/0!	#DIV/0!	#DIV/0!
491	HPF	DG	DGmb-sg	823	Dentate gyrus medial blade, granule cell layer	#DIV/0!	#DIV/0!	#DIV/0!	#DIV/0!	#DIV/0!	#DIV/0!	#DIV/0!	#DIV/0!	#DIV/0!	#DIV/0!	#DIV/0!	#DIV/0!	#DIV/0!	#DIV/0!	#DIV/0!	#DIV/0!	#DIV/0!	#DIV/0!	#DIV/0!	#DIV/0!	#DIV/0!	#DIV/0!	#DIV/0!	#DIV/0!	#DIV/0!	#DIV/0!	#DIV/0!	#DIV/0!
492	HPF	FC	FC	982	Fasciola cinerea	0.0447761	#DIV/0!	#DIV/0!	#DIV/0!	#DIV/0!	#DIV/0!	#DIV/0!	#DIV/0!	#DIV/0!	#DIV/0!	#DIV/0!	#DIV/0!	#DIV/0!	#DIV/0!	#DIV/0!	#DIV/0!	#DIV/0!	#DIV/0!	#DIV/0!	#DIV/0!	#DIV/0!	#DIV/0!	#DIV/0!	#DIV/0!	#DIV/0!	#DIV/0!	#DIV/0!	#DIV/0!
493	HPF	IG	IG	19	Induseum griseum	0.0435698	#DIV/0!	#DIV/0!	#DIV/0!	#DIV/0!	#DIV/0!	#DIV/0!	#DIV/0!	#DIV/0!	#DIV/0!	#DIV/0!	#DIV/0!	#DIV/0!	#DIV/0!	#DIV/0!	#DIV/0!	#DIV/0!	#DIV/0!	#DIV/0!	#DIV/0!	#DIV/0!	#DIV/0!	#DIV/0!	#DIV/0!	#DIV/0!	#DIV/0!	#DIV/0!	#DIV/0!
494	HPF	RHP	RHP	822	Retrohippocampal region	#DIV/0!	#DIV/0!	#DIV/0!	#DIV/0!	#DIV/0!	#DIV/0!	#DIV/0!	#DIV/0!	#DIV/0!	#DIV/0!	#DIV/0!	#DIV/0!	#DIV/0!	#DIV/0!	#DIV/0!	#DIV/0!	#DIV/0!	#DIV/0!	#DIV/0!	#DIV/0!	#DIV/0!	#DIV/0!	#DIV/0!	#DIV/0!	#DIV/0!	#DIV/0!	#DIV/0!	#DIV/0!
495	HPF	ENT	ENT	909	Entorhinal area	#DIV/0!	#DIV/0!	#DIV/0!	#DIV/0!	#DIV/0!	#DIV/0!	#DIV/0!	#DIV/0!	#DIV/0!	#DIV/0!	#DIV/0!	#DIV/0!	#DIV/0!	#DIV/0!	#DIV/0!	#DIV/0!	#DIV/0!	#DIV/0!	#DIV/0!	#DIV/0!	#DIV/0!	#DIV/0!	#DIV/0!	#DIV/0!	#DIV/0!	#DIV/0!	#DIV/0!	#DIV/0!
496	HPF	ENT	ENTl	918	Entorhinal area, lateral part	#DIV/0!	#DIV/0!	#DIV/0!	#DIV/0!	#DIV/0!	#DIV/0!	#DIV/0!	#DIV/0!	#DIV/0!	#DIV/0!	#DIV/0!	#DIV/0!	#DIV/0!	#DIV/0!	#DIV/0!	#DIV/0!	#DIV/0!	#DIV/0!	#DIV/0!	#DIV/0!	#DIV/0!	#DIV/0!	#DIV/0!	#DIV/0!	#DIV/0!	#DIV/0!	#DIV/0!	#DIV/0!
497	HPF	ENT	ENTl1	1121	Entorhinal area, lateral part, layer 1	#DIV/0!	#DIV/0!	#DIV/0!	#DIV/0!	#DIV/0!	#DIV/0!	#DIV/0!	#DIV/0!	#DIV/0!	#DIV/0!	#DIV/0!	#DIV/0!	#DIV/0!	#DIV/0!	#DIV/0!	#DIV/0!	#DIV/0!	#DIV/0!	#DIV/0!	#DIV/0!	#DIV/0!	#DIV/0!	#DIV/0!	#DIV/0!	#DIV/0!	#DIV/0!	#DIV/0!	#DIV/0!
498	HPF	ENT	ENTl2	20	Entorhinal area, lateral part, layer 2	#DIV/0!	#DIV/0!	#DIV/0!	#DIV/0!	#DIV/0!	#DIV/0!	#DIV/0!	#DIV/0!	#DIV/0!	#DIV/0!	#DIV/0!	#DIV/0!	#DIV/0!	#DIV/0!	#DIV/0!	#DIV/0!	#DIV/0!	#DIV/0!	#DIV/0!	#DIV/0!	#DIV/0!	#DIV/0!	#DIV/0!	#DIV/0!	#DIV/0!	#DIV/0!	#DIV/0!	#DIV/0!
499	HPF	ENT	ENTl2/3	999	Entorhinal area, lateral part, layer 2/3	#DIV/0!	#DIV/0!	#DIV/0!	#DIV/0!	#DIV/0!	#DIV/0!	#DIV/0!	#DIV/0!	#DIV/0!	#DIV/0!	#DIV/0!	#DIV/0!	#DIV/0!	#DIV/0!	#DIV/0!	#DIV/0!	#DIV/0!	#DIV/0!	#DIV/0!	#DIV/0!	#DIV/0!	#DIV/0!	#DIV/0!	#DIV/0!	#DIV/0!	#DIV/0!	#DIV/0!	#DIV/0!
500	HPF	ENT	ENTl2a	715	Entorhinal area, lateral part, layer 2a	#DIV/0!	#DIV/0!	#DIV/0!	#DIV/0!	#DIV/0!	#DIV/0!	#DIV/0!	#DIV/0!	#DIV/0!	#DIV/0!	#DIV/0!	#DIV/0!	#DIV/0!	#DIV/0!	#DIV/0!	#DIV/0!	#DIV/0!	#DIV/0!	#DIV/0!	#DIV/0!	#DIV/0!	#DIV/0!	#DIV/0!	#DIV/0!	#DIV/0!	#DIV/0!	#DIV/0!	#DIV/0!
501	HPF	ENT	ENTl2b	764	Entorhinal area, lateral part, layer 2b	#DIV/0!	#DIV/0!	#DIV/0!	#DIV/0!	#DIV/0!	#DIV/0!	#DIV/0!	#DIV/0!	#DIV/0!	#DIV/0!	#DIV/0!	#DIV/0!	#DIV/0!	#DIV/0!	#DIV/0!	#DIV/0!	#DIV/0!	#DIV/0!	#DIV/0!	#DIV/0!	#DIV/0!	#DIV/0!	#DIV/0!	#DIV/0!	#DIV/0!	#DIV/0!	#DIV/0!	#DIV/0!
502	HPF	ENT	ENTl3	52	Entorhinal area, lateral part, layer 3	#DIV/0!	#DIV/0!	#DIV/0!	#DIV/0!	#DIV/0!	#DIV/0!	#DIV/0!	#DIV/0!	#DIV/0!	#DIV/0!	#DIV/0!	#DIV/0!	#DIV/0!	#DIV/0!	#DIV/0!	#DIV/0!	#DIV/0!	#DIV/0!	#DIV/0!	#DIV/0!	#DIV/0!	#DIV/0!	#DIV/0!	#DIV/0!	#DIV/0!	#DIV/0!	#DIV/0!	#DIV/0!
503	HPF	ENT	ENTl4	92	Entorhinal area, lateral part, layer 4	#DIV/0!	#DIV/0!	#DIV/0!	#DIV/0!	#DIV/0!	#DIV/0!	#DIV/0!	#DIV/0!	#DIV/0!	#DIV/0!	#DIV/0!	#DIV/0!	#DIV/0!	#DIV/0!	#DIV/0!	#DIV/0!	#DIV/0!	#DIV/0!	#DIV/0!	#DIV/0!	#DIV/0!	#DIV/0!	#DIV/0!	#DIV/0!	#DIV/0!	#DIV/0!	#DIV/0!	#DIV/0!
504	HPF	ENT	ENTl4/5	312	Entorhinal area, lateral part, layer 4/5	#DIV/0!	#DIV/0!	#DIV/0!	#DIV/0!	#DIV/0!	#DIV/0!	#DIV/0!	#DIV/0!	#DIV/0!	#DIV/0!	#DIV/0!	#DIV/0!	#DIV/0!	#DIV/0!	#DIV/0!	#DIV/0!	#DIV/0!	#DIV/0!	#DIV/0!	#DIV/0!	#DIV/0!	#DIV/0!	#DIV/0!	#DIV/0!	#DIV/0!	#DIV/0!	#DIV/0!	#DIV/0!
505	HPF	ENT	ENTl5	139	Entorhinal area, lateral part, layer 5	#DIV/0!	#DIV/0!	#DIV/0!	#DIV/0!	#DIV/0!	#DIV/0!	#DIV/0!	#DIV/0!	#DIV/0!	#DIV/0!	#DIV/0!	#DIV/0!	#DIV/0!	#DIV/0!	#DIV/0!	#DIV/0!	#DIV/0!	#DIV/0!	#DIV/0!	#DIV/0!	#DIV/0!	#DIV/0!	#DIV/0!	#DIV/0!	#DIV/0!	#DIV/0!	#DIV/0!	#DIV/0!
506	HPF	ENT	ENTl5/6	387	Entorhinal area, lateral part, layer 5/6	#DIV/0!	#DIV/0!	#DIV/0!	#DIV/0!	#DIV/0!	#DIV/0!	#DIV/0!	#DIV/0!	#DIV/0!	#DIV/0!	#DIV/0!	#DIV/0!	#DIV/0!	#DIV/0!	#DIV/0!	#DIV/0!	#DIV/0!	#DIV/0!	#DIV/0!	#DIV/0!	#DIV/0!	#DIV/0!	#DIV/0!	#DIV/0!	#DIV/0!	#DIV/0!	#DIV/0!	#DIV/0!
507	HPF	ENT	ENTl6a	28	Entorhinal area, lateral part, layer 6a	#DIV/0!	#DIV/0!	#DIV/0!	#DIV/0!	#DIV/0!	#DIV/0!	#DIV/0!	#DIV/0!	#DIV/0!	#DIV/0!	#DIV/0!	#DIV/0!	#DIV/0!	#DIV/0!	#DIV/0!	#DIV/0!	#DIV/0!	#DIV/0!	#DIV/0!	#DIV/0!	#DIV/0!	#DIV/0!	#DIV/0!	#DIV/0!	#DIV/0!	#DIV/0!	#DIV/0!	#DIV/0!
508	HPF	ENT	ENTl6b	60	Entorhinal area, lateral part, layer 6b	#DIV/0!	#DIV/0!	#DIV/0!	#DIV/0!	#DIV/0!	#DIV/0!	#DIV/0!	#DIV/0!	#DIV/0!	#DIV/0!	#DIV/0!	#DIV/0!	#DIV/0!	#DIV/0!	#DIV/0!	#DIV/0!	#DIV/0!	#DIV/0!	#DIV/0!	#DIV/0!	#DIV/0!	#DIV/0!	#DIV/0!	#DIV/0!	#DIV/0!	#DIV/0!	#DIV/0!	#DIV/0!
509	HPF	ENT	ENTm	926	Entorhinal area, medial part, dorsal zone	#DIV/0!	#DIV/0!	#DIV/0!	#DIV/0!	#DIV/0!	#DIV/0!	#DIV/0!	#DIV/0!	#DIV/0!	#DIV/0!	#DIV/0!	#DIV/0!	#DIV/0!	#DIV/0!	#DIV/0!	#DIV/0!	#DIV/0!	#DIV/0!	#DIV/0!	#DIV/0!	#DIV/0!	#DIV/0!	#DIV/0!	#DIV/0!	#DIV/0!	#DIV/0!	#DIV/0!	#DIV/0!
510	HPF	ENT	ENTm1	526	Entorhinal area, medial part, dorsal zone, layer 1	#DIV/0!	#DIV/0!	#DIV/0!	#DIV/0!	#DIV/0!	#DIV/0!	#DIV/0!	#DIV/0!	#DIV/0!	#DIV/0!	#DIV/0!	#DIV/0!	#DIV/0!	#DIV/0!	#DIV/0!	#DIV/0!	#DIV/0!	#DIV/0!	#DIV/0!	#DIV/0!	#DIV/0!	#DIV/0!	#DIV/0!	#DIV/0!	#DIV/0!	#DIV/0!	#DIV/0!	#DIV/0!
511	HPF	ENT	ENTm2	543	Entorhinal area, medial part, dorsal zone, layer 2	#DIV/0!	#DIV/0!	#DIV/0!	#DIV/0!	#DIV/0!	#DIV/0!	#DIV/0!	#DIV/0!	#DIV/0!	#DIV/0!	#DIV/0!	#DIV/0!	#DIV/0!	#DIV/0!	#DIV/0!	#DIV/0!	#DIV/0!	#DIV/0!	#DIV/0!	#DIV/0!	#DIV/0!	#DIV/0!	#DIV/0!	#DIV/0!	#DIV/0!	#DIV/0!	#DIV/0!	#DIV/0!
512	HPF	ENT	ENTm2a	468	Entorhinal area, medial part, dorsal zone, layer 2a	#DIV/0!	#DIV/0!	#DIV/0!	#DIV/0!	#DIV/0!	#DIV/0!	#DIV/0!	#DIV/0!	#DIV/0!	#DIV/0!	#DIV/0!	#DIV/0!	#DIV/0!	#DIV/0!	#DIV/0!	#DIV/0!	#DIV/0!	#DIV/0!	#DIV/0!	#DIV/0!	#DIV/0!	#DIV/0!	#DIV/0!	#DIV/0!	#DIV/0!	#DIV/0!	#DIV/0!	#DIV/0!
513	HPF	ENT	ENTm2b	508	Entorhinal area, medial part, dorsal zone, layer 2b	#DIV/0!	#DIV/0!	#DIV/0!	#DIV/0!	#DIV/0!	#DIV/0!	#DIV/0!	#DIV/0!	#DIV/0!	#DIV/0!	#DIV/0!	#DIV/0!	#DIV/0!	#DIV/0!	#DIV/0!	#DIV/0!	#DIV/0!	#DIV/0!	#DIV/0!	#DIV/0!	#DIV/0!	#DIV/0!	#DIV/0!	#DIV/0!	#DIV/0!	#DIV/0!	#DIV/0!	#DIV/0!
514	HPF	ENT	ENTm3	664	Entorhinal area, medial part, dorsal zone, layer 3	#DIV/0!	#DIV/0!	#DIV/0!	#DIV/0!	#DIV/0!	#DIV/0!	#DIV/0!	#DIV/0!	#DIV/0!	#DIV/0!	#DIV/0!	#DIV/0!	#DIV/0!	#DIV/0!	#DIV/0!	#DIV/0!	#DIV/0!	#DIV/0!	#DIV/0!	#DIV/0!	#DIV/0!	#DIV/0!	#DIV/0!	#DIV/0!	#DIV/0!	#DIV/0!	#DIV/0!	#DIV/0!
515	HPF	ENT	ENTm4	712	Entorhinal area, medial part, dorsal zone, layer 4	#DIV/0!	#DIV/0!	#DIV/0!	#DIV/0!	#DIV/0!	#DIV/0!	#DIV/0!	#DIV/0!	#DIV/0!	#DIV/0!	#DIV/0!	#DIV/0!	#DIV/0!	#DIV/0!	#DIV/0!	#DIV/0!	#DIV/0!	#DIV/0!	#DIV/0!	#DIV/0!	#DIV/0!	#DIV/0!	#DIV/0!	#DIV/0!	#DIV/0!	#DIV/0!	#DIV/0!	#DIV/0!
516	HPF	ENT	ENTm5	727	Entorhinal area, medial part, dorsal zone, layer 5	#DIV/0!	#DIV/0!	#DIV/0!	#DIV/0!	#DIV/0!	#DIV/0!	#DIV/0!	#DIV/0!	#DIV/0!	#DIV/0!	#DIV/0!	#DIV/0!	#DIV/0!	#DIV/0!	#DIV/0!	#DIV/0!	#DIV/0!	#DIV/0!	#DIV/0!	#DIV/0!	#DIV/0!	#DIV/0!	#DIV/0!	#DIV/0!	#DIV/0!	#DIV/0!	#DIV/0!	#DIV/0!
517	HPF	ENT	ENTm5/6	550	Entorhinal area, medial part, dorsal zone, layer 5/6	#DIV/0!	#DIV/0!	#DIV/0!	#DIV/0!	#DIV/0!	#DIV/0!	#DIV/0!	#DIV/0!	#DIV/0!	#DIV/0!	#DIV/0!	#DIV/0!	#DIV/0!	#DIV/0!	#DIV/0!	#DIV/0!	#DIV/0!	#DIV/0!	#DIV/0!	#DIV/0!	#DIV/0!	#DIV/0!	#DIV/0!	#DIV/0!	#DIV/0!	#DIV/0!	#DIV/0!	#DIV/0!
518	HPF	ENT	ENTm6	743	Entorhinal area, medial part, dorsal zone, layer 6	#DIV/0!	#DIV/0!	#DIV/0!	#DIV/0!	#DIV/0!	#DIV/0!	#DIV/0!	#DIV/0!	#DIV/0!	#DIV/0!	#DIV/0!	#DIV/0!	#DIV/0!	#DIV/0!	#DIV/0!	#DIV/0!	#DIV/0!	#DIV/0!	#DIV/0!	#DIV/0!	#DIV/0!	#DIV/0!	#DIV/0!	#DIV/0!	#DIV/0!	#DIV/0!	#DIV/0!	#DIV/0!
519	HPF	ENT	ENTmv	934	Entorhinal area, medial part, ventral zone	#DIV/0!	#DIV/0!	#DIV/0!	#DIV/0!	#DIV/0!	#DIV/0!	#DIV/0!	#DIV/0!	#DIV/0!	#DIV/0!	#DIV/0!	#DIV/0!	#DIV/0!	#DIV/0!	#DIV/0!	#DIV/0!	#DIV/0!	#DIV/0!	#DIV/0!	#DIV/0!	#DIV/0!	#DIV/0!	#DIV/0!	#DIV/0!	#DIV/0!	#DIV/0!	#DIV/0!	#DIV/0!
520	HPF	ENT	ENTmv1	259	Entorhinal area, medial part, ventral zone, layer 1	#DIV/0!	#DIV/0!	#DIV/0!	#DIV/0!	#DIV/0!	#DIV/0!	#DIV/0!	#DIV/0!	#DIV/0!	#DIV/0!	#DIV/0!	#DIV/0!	#DIV/0!	#DIV/0!	#DIV/0!	#DIV/0!	#DIV/0!	#DIV/0!	#DIV/0!	#DIV/0!	#DIV/0!	#DIV/0!	#DIV/0!	#DIV/0!	#DIV/0!	#DIV/0!	#DIV/0!	#DIV/0!
521	HPF	ENT	ENTmv2	324	Entorhinal area, medial part, ventral zone, layer 2	#DIV/0!	#DIV/0!	#DIV/0!	#DIV/0!	#DIV/0!	#DIV/0!	#DIV/0!	#DIV/0!	#DIV/0!	#DIV/0!	#DIV/0!	#DIV/0!	#DIV/0!	#DIV/0!	#DIV/0!	#DIV/0!	#DIV/0!	#DIV/0!	#DIV/0!	#DIV/0!	#DIV/0!	#DIV/0!	#DIV/0!	#DIV/0!	#DIV/0!	#DIV/0!	#DIV/0!	#DIV/0!
522	HPF	ENT	ENTmv3	371	Entorhinal area, medial part, ventral zone, layer 3	#DIV/0!	#DIV/0!	#DIV/0!	#DIV/0!	#DIV/0!	#DIV/0!	#DIV/0!	#DIV/0!	#DIV/0!	#DIV/0!	#DIV/0!	#DIV/0!	#DIV/0!	#DIV/0!	#DIV/0!	#DIV/0!	#DIV/0!	#DIV/0!	#DIV/0!	#DIV/0!	#DIV/0!	#DIV/0!	#DIV/0!	#DIV/0!	#DIV/0!	#DIV/0!	#DIV/0!	#DIV/0!
523	HPF	ENT	ENTmv4	419	Entorhinal area, medial part, ventral zone, layer 4	#DIV/0!	#DIV/0!	#DIV/0!	#DIV/0!	#DIV/0!	#DIV/0!	#DIV/0!	#DIV/0!	#DIV/0!	#DIV/0!	#DIV/0!	#DIV/0!	#DIV/0!	#DIV/0!	#DIV/0!	#DIV/0!	#DIV/0!	#DIV/0!	#DIV/0!	#DIV/0!	#DIV/0!	#DIV/0!	#DIV/0!	#DIV/0!	#DIV/0!	#DIV/0!	#DIV/0!	#DIV/0!
524	HPF	ENT	ENTmv5/6	1133	Entorhinal area, medial part, ventral zone, layer 5/6	#DIV/0!	#DIV/0!	#DIV/0!	#DIV/0!	#DIV/0!	#DIV/0!	#DIV/0!	#DIV/0!	#DIV/0!	#DIV/0!	#DIV/0!	#DIV/0!	#DIV/0!	#DIV/0!	#DIV/0!	#DIV/0!	#DIV/0!	#DIV/0!	#DIV/0!	#DIV/0!	#DIV/0!	#DIV/0!	#DIV/0!	#DIV/0!	#DIV/0!	#DIV/0!	#DIV/0!	#DIV/0!
525	HPF	PAR	PAR	843	Parasubiculum	#DIV/0!	#DIV/0!	#DIV/0!	#DIV/0!	#DIV/0!	#DIV/0!	#DIV/0!	#DIV/0!	#DIV/0!	#DIV/0!	#DIV/0!	#DIV/0!	#DIV/0!	#DIV/0!	#DIV/0!	#DIV/0!	#DIV/0!	#DIV/0!	#DIV/0!	#DIV/0!	#DIV/0!	#DIV/0!	#DIV/0!	#DIV/0!	#DIV/0!	#DIV/0!	#DIV/0!	#DIV/0!
526	HPF	PAR	PAR1	10693	Parasubiculum, layer 1	#DIV/0!	#DIV/0!	#DIV/0!	#DIV/0!	#DIV/0!	#DIV/0!	#DIV/0!	#DIV/0!	#DIV/0!	#DIV/0!	#DIV/0!	#DIV/0!	#DIV/0!	#DIV/0!	#DIV/0!	#DIV/0!	#DIV/0!	#DIV/0!	#DIV/0!	#DIV/0!	#DIV/0!	#DIV/0!	#DIV/0!	#DIV/0!	#DIV/0!	#DIV/0!	#DIV/0!	#DIV/0!
527	HPF	PAR	PAR2	10694	Parasubiculum, layer 2	#DIV/0!	#DIV/0!	#DIV/0!	#DIV/0!	#DIV/0!	#DIV/0!	#DIV/0!	#DIV/0!	#DIV/0!	#DIV/0!	#DIV/0!	#DIV/0!	#DIV/0!	#DIV/0!	#DIV/0!	#DIV/0!	#DIV/0!	#DIV/0!	#DIV/0!	#DIV/0!	#DIV/0!	#DIV/0!	#DIV/0!	#DIV/0!	#DIV/0!	#DIV/0!	#DIV/0!	#DIV/0!
528	HPF	PAR	PAR3	10695	Parasubiculum, layer 3	#DIV/0!	#DIV/0!	#DIV/0!	#DIV/0!	#DIV/0!	#DIV/0!	#DIV/0!	#DIV/0!	#DIV/0!	#DIV/0!	#DIV/0!	#DIV/0!	#DIV/0!	#DIV/0!	#DIV/0!	#DIV/0!	#DIV/0!	#DIV/0!	#DIV/0!	#DIV/0!	#DIV/0!	#DIV/0!	#DIV/0!	#DIV/0!	#DIV/0!	#DIV/0!	#DIV/0!	#DIV/0!
529	HPF	PAR	POST	1037	Postsubiculum	0.00842668	#DIV/0!	#DIV/0!	#DIV/0!	0.104277	#DIV/0!	0.0626455	#DIV/0!	#DIV/0!	#DIV/0!	0.0911609	#DIV/0!	#DIV/0!	#DIV/0!	#DIV/0!	#DIV/0!	#DIV/0!	0.0034919	#DIV/0!	#DIV/0!	0.0059484	0.023495	#DIV/0!	0.0102542	0.0308066	#DIV/0!	#DIV/0!	#DIV/0!
530	HPF	PAR	POST1	10696	Postsubiculum, layer 1	#DIV/0!	#DIV/0!	#DIV/0!	#DIV/0!	#DIV/0!	#DIV/0!	#DIV/0!	#DIV/0!	#DIV/0!	#DIV/0!	#DIV/0!	#DIV/0!	#DIV/0!	#DIV/0!	#DIV/0!	#DIV/0!	#DIV/0!	#DIV/0!	#DIV/0!	#DIV/0!	#DIV/0!	#DIV/0!	#DIV/0!	#DIV/0!	#DIV/0!	#DIV/0!	#DIV/0!	#DIV/0!
531	HPF	PAR	POST2	10697	Postsubiculum, layer 2	#DIV/0!	#DIV/0!	#DIV/0!	#DIV/0!	#DIV/0!	#DIV/0!	#DIV/0!	#DIV/0!	#DIV/0!	#DIV/0!	#DIV/0!	#DIV/0!	#DIV/0!	#DIV/0!	#DIV/0!	#DIV/0!	#DIV/0!	#DIV/0!	#DIV/0!	#DIV/0!	#DIV/0!	#DIV/0!	#DIV/0!	#DIV/0!	#DIV/0!	#DIV/0!	#DIV/0!	#DIV/0!
532	HPF	PAR	POST3	10698	Postsubiculum, layer 3	#DIV/0!	#DIV/0!	#DIV/0!	#DIV/0!	#DIV/0!	#DIV/0!	#DIV/0!	#DIV/0!	#DIV/0!	#DIV/0!	#DIV/0!	#DIV/0!	#DIV/0!	#DIV/0!	#DIV/0!	#DIV/0!	#DIV/0!	#DIV/0!	#DIV/0!	#DIV/0!	#DIV/0!	#DIV/0!	#DIV/0!	#DIV/0!	#DIV/0!	#DIV/0!	#DIV/0!	#DIV/0!
533	HPF	PAR	PRE	1084	Presubiculum	#DIV/0!	#DIV/0!	#DIV/0!	#DIV/0!	#DIV/0!	#DIV/0!	#DIV/0!	#DIV/0!	#DIV/0!	#DIV/0!	#DIV/0!	#DIV/0!	#DIV/0!	#DIV/0!	#DIV/0!	#DIV/0!	#DIV/0!	#DIV/0!	#DIV/0!	#DIV/0!	#DIV/0!	#DIV/0!	#DIV/0!	#DIV/0!	#DIV/0!	#DIV/0!	#DIV/0!	#DIV/0!
534	HPF	PAR	PRE1	10699	Presubiculum, layer 1	#DIV/0!	#DIV/0!	#DIV/0!	#DIV/0!	#DIV/0!	#DIV/0!	#DIV/0!	#DIV/0!	#DIV/0!	#DIV/0!	#DIV/0!	#DIV/0!	#DIV/0!	#DIV/0!	#DIV/0!	#DIV/0!	#DIV/0!	#DIV/0!	#DIV/0!	#DIV/0!	#DIV/0!	#DIV/0!	#DIV/0!	#DIV/0!	#DIV/0!	#DIV/0!	#DIV/0!	#DIV/0!
535	HPF	PAR	PRE2	10700	Presubiculum, layer 2	#DIV/0!	#DIV/0!	#DIV/0!	#DIV/0!	#DIV/0!	#DIV/0!	#DIV/0!	#DIV/0!	#DIV/0!	#DIV/0!	#DIV/0!	#DIV/0!	#DIV/0!	#DIV/0!	#DIV/0!	#DIV/0!	#DIV/0!	#DIV/0!	#DIV/0!	#DIV/0!	#DIV/0!	#DIV/0!	#DIV/0!	#DIV/0!	#DIV/0!	#DIV/0!	#DIV/0!	#DIV/0!
536	HPF	PAR	PRE3	10701	Presubiculum, layer 3	#DIV/0!	#DIV/0!	#DIV/0!	#DIV/0!	#DIV/0!	#DIV/0!	#DIV/0!	#DIV/0!	#DIV/0!	#DIV/0!	#DIV/0!	#DIV/0!	#DIV/0!	#DIV/0!	#DIV/0!	#DIV/0!	#DIV/0!	#DIV/0!	#DIV/0!	#DIV/0!	#DIV/0!	#DIV/0!	#DIV/0!	#DIV/0!	#DIV/0!	#DIV/0!	#DIV/0!	#DIV/0!
537	HPF	SUB	SUB	502	Subiculum	0.0415125	0.0543354	0.0499211	0.0478628	0.0849066	0.0779265	0.0756075	0.0666527	0.0975617	0.0961429	0.080091	0.088733	0.00254317	0.000877724	0.00286604	0.00155254	0.00895128	0.0108752	0.00964618	0.0134669	0.0128672	0.0168504	0.0176773	0.0251976	0.0255226	0.0324208	0.0335363	0.0251074
538	HPF	SUB	SUBd	509	Subiculum, dorsal part	#DIV/0!	#DIV/0!	#DIV/0!	#DIV/0!	#DIV/0!	#DIV/0!	#DIV/0!	#DIV/0!	#DIV/0!	#DIV/0!	#DIV/0!	#DIV/0!	#DIV/0!	#DIV/0!	#DIV/0!	#DIV/0!	#DIV/0!	#DIV/0!	#DIV/0!	#DIV/0!	#DIV/0!	#DIV/0!	#DIV/0!	#DIV/0!	#DIV/0!	#DIV/0!	#DIV/0!	#DIV/0!
539	HPF	SUB	SUBd-m	829	Subiculum, dorsal part, molecular layer	#DIV/0!	#DIV/0!	#DIV/0!	#DIV/0!	#DIV/0!	#DIV/0!	#DIV/0!	#DIV/0!	#DIV/0!	#DIV/0!	#DIV/0!	#DIV/0!	#DIV/0!	#DIV/0!	#DIV/0!	#DIV/0!	#DIV/0!	#DIV/0!	#DIV/0!	#DIV/0!	#DIV/0!	#DIV/0!	#DIV/0!	#DIV/0!	#DIV/0!	#DIV/0!	#DIV/0!	#DIV/0!
540	HPF	SUB	SUBd-sp	845	Subiculum, dorsal part, pyramidal layer	#DIV/0!	#DIV/0!	#DIV/0!	#DIV/0!	#DIV/0!	#DIV/0!	#DIV/0!	#DIV/0!	#DIV/0!	#DIV/0!	#DIV/0!	#DIV/0!	#DIV/0!	#DIV/0!	#DIV/0!	#DIV/0!	#DIV/0!	#DIV/0!	#DIV/0!	#DIV/0!	#DIV/0!	#DIV/0!	#DIV/0!	#DIV/0!	#DIV/0!	#DIV/0!	#DIV/0!	#DIV/0!
541	HPF	SUB	SUBd-sr	837	Subiculum, dorsal part, stratum radiatum	#DIV/0!	#DIV/0!	#DIV/0!	#DIV/0!	#DIV/0!	#DIV/0!	#DIV/0!	#DIV/0!	#DIV/0!	#DIV/0!	#DIV/0!	#DIV/0!	#DIV/0!	#DIV/0!	#DIV/0!	#DIV/0!	#DIV/0!	#DIV/0!	#DIV/0!	#DIV/0!	#DIV/0!	#DIV/0!	#DIV/0!	#DIV/0!	#DIV/0!	#DIV/0!	#DIV/0!	#DIV/0!
542	HPF	SUB	SUBv	518	Subiculum, ventral part	#DIV/0!	#DIV/0!	#DIV/0!	#DIV/0!	#DIV/0!	#DIV/0!	#DIV/0!	#DIV/0!	#DIV/0!	#DIV/0!	#DIV/0!	#DIV/0!	#DIV/0!	#DIV/0!	#DIV/0!	#DIV/0!	#DIV/0!	#DIV/0!	#DIV/0!	#DIV/0!	#DIV/0!	#DIV/0!	#DIV/0!	#DIV/0!	#DIV/0!	#DIV/0!	#DIV/0!	#DIV/0!
543	HPF	SUB	SUBv-m	853	Subiculum, ventral part, molecular layer	#DIV/0!	#DIV/0!	#DIV/0!	#DIV/0!	#DIV/0!	#DIV/0!	#DIV/0!	#DIV/0!	#DIV/0!	#DIV/0!	#DIV/0!	#DIV/0!	#DIV/0!	#DIV/0!	#DIV/0!	#DIV/0!	#DIV/0!	#DIV/0!	#DIV/0!	#DIV/0!	#DIV/0!	#DIV/0!	#DIV/0!	#DIV/0!	#DIV/0!	#DIV/0!	#DIV/0!	#DIV/0!
544	HPF	SUB	SUBv-sp	870	Subiculum, ventral part, pyramidal layer	#DIV/0!	#DIV/0!	#DIV/0!	#DIV/0!	#DIV/0!	#DIV/0!	#DIV/0!	#DIV/0!	#DIV/0!	#DIV/0!	#DIV/0!	#DIV/0!	#DIV/0!	#DIV/0!	#DIV/0!	#DIV/0!	#DIV/0!	#DIV/0!	#DIV/0!	#DIV/0!	#DIV/0!	#DIV/0!	#DIV/0!	#DIV/0!	#DIV/0!	#DIV/0!	#DIV/0!	#DIV/0!
545	HPF	SUB	SUBv-sr	861	Subiculum, ventral part, stratum radiatum	#DIV/0!	#DIV/0!	#DIV/0!	#DIV/0!	#DIV/0!	#DIV/0!	#DIV/0!	#DIV/0!	#DIV/0!	#DIV/0!	#DIV/0!	#DIV/0!	#DIV/0!	#DIV/0!	#DIV/0!	#DIV/0!	#DIV/0!	#DIV/0!	#DIV/0!	#DIV/0!	#DIV/0!	#DIV/0!	#DIV/0!	#DIV/0!	#DIV/0!	#DIV/0!	#DIV/0!	#DIV/0!
546	HPF	ProS	ProS	484682470	Prosubiculum	0.0441029	0.0588494	0.0237792	0.0248609	0.0747174	0.0825734	0.0579279	0.0429717	0.102128	0.0939113	0.0787117	0.0562537	0.00138468	0.00192928	0.00106955	#DIV/0!	0.00944663	0.0132064	0.0145254	0.0350084	0.0107974	0.0192405	0.017658	0.0272141	0.0311636	0.0459296	0.0325089	0.0162446
547	HPF	ProS	ProSd	484682475	Prosubiculum, dorsal part	#DIV/0!	#DIV/0!	#DIV/0!	#DIV/0!	#DIV/0!	#DIV/0!	#DIV/0!	#DIV/0!	#DIV/0!	#DIV/0!	#DIV/0!	#DIV/0!	#DIV/0!	#DIV/0!	#DIV/0!	#DIV/0!	#DIV/0!	#DIV/0!	#DIV/0!	#DIV/0!	#DIV/0!	#DIV/0!	#DIV/0!	#DIV/0!	#DIV/0!	#DIV/0!	#DIV/0!	#DIV/0!
548	HPF	ProS	ProSd-m	484682479	Prosubiculum, dorsal part, molecular layer	#DIV/0!	#DIV/0!	#DIV/0!	#DIV/0!	#DIV/0!	#DIV/0!	#DIV/0!	#DIV/0!	#DIV/0!	#DIV/0!	#DIV/0!	#DIV/0!	#DIV/0!	#DIV/0!	#DIV/0!	#DIV/0!	#DIV/0!	#DIV/0!	#DIV/0!	#DIV/0!	#DIV/0!	#DIV/0!	#DIV/0!	#DIV/0!	#DIV/0!	#DIV/0!	#DIV/0!	#DIV/0!
549	HPF	ProS	ProSd-sp	484682483	Prosubiculum, dorsal part, pyramidal layer	#DIV/0!	#DIV/0!	#DIV/0!	#DIV/0!	#DIV/0!	#DIV/0!	#DIV/0!	#DIV/0!	#DIV/0!	#DIV/0!	#DIV/0!	#DIV/0!	#DIV/0!	#DIV/0!	#DIV/0!	#DIV/0!	#DIV/0!	#DIV/0!	#DIV/0!	#DIV/0!	#DIV/0!	#DIV/0!	#DIV/0!	#DIV/0!	#DIV/0!	#DIV/0!	#DIV/0!	#DIV/0!
550	HPF	ProS	ProSd-sr	484682487	Prosubiculum, dorsal part, stratum radiatum	#DIV/0!	#DIV/0!	#DIV/0!	#DIV/0!	#DIV/0!	#DIV/0!	#DIV/0!	#DIV/0!	#DIV/0!	#DIV/0!	#DIV/0!	#DIV/0!	#DIV/0!	#DIV/0!	#DIV/0!	#DIV/0!	#DIV/0!	#DIV/0!	#DIV/0!	#DIV/0!	#DIV/0!	#DIV/0!	#DIV/0!	#DIV/0!	#DIV/0!	#DIV/0!	#DIV/0!	#DIV/0!
551	HPF	ProS	ProSv	484682492	Prosubiculum, ventral part	#DIV/0!	#DIV/0!	#DIV/0!	#DIV/0!	#DIV/0!	#DIV/0!	#DIV/0!	#DIV/0!	#DIV/0!	#DIV/0!	#DIV/0!	#DIV/0!	#DIV/0!	#DIV/0!	#DIV/0!	#DIV/0!	#DIV/0!	#DIV/0!	#DIV/0!	#DIV/0!	#DIV/0!	#DIV/0!	#DIV/0!	#DIV/0!	#DIV/0!	#DIV/0!	#DIV/0!	#DIV/0!
552	HPF	ProS	ProSv-m	484682496	Prosubiculum, ventral part, molecular layer	#DIV/0!	#DIV/0!	#DIV/0!	#DIV/0!	#DIV/0!	#DIV/0!	#DIV/0!	#DIV/0!	#DIV/0!	#DIV/0!	#DIV/0!	#DIV/0!	#DIV/0!	#DIV/0!	#DIV/0!	#DIV/0!	#DIV/0!	#DIV/0!	#DIV/0!	#DIV/0!	#DIV/0!	#DIV/0!	#DIV/0!	#DIV/0!	#DIV/0!	#DIV/0!	#DIV/0!	#DIV/0!
553	HPF	ProS	ProSv-sp	484682500	Prosubiculum, ventral part, pyramidal layer	#DIV/0!	#DIV/0!	#DIV/0!	#DIV/0!	#DIV/0!	#DIV/0!	#DIV/0!	#DIV/0!	#DIV/0!	#DIV/0!	#DIV/0!	#DIV/0!	#DIV/0!	#DIV/0!	#DIV/0!	#DIV/0!	#DIV/0!	#DIV/0!	#DIV/0!	#DIV/0!	#DIV/0!	#DIV/0!	#DIV/0!	#DIV/0!	#DIV/0!	#DIV/0!	#DIV/0!	#DIV/0!
554	HPF	ProS	Prosv-sr	484682504	Prosubiculum, ventral part, stratum radiatum	#DIV/0!	#DIV/0!	#DIV/0!	#DIV/0!	#DIV/0!	#DIV/0!	#DIV/0!	#DIV/0!	#DIV/0!	#DIV/0!	#DIV/0!	#DIV/0!	#DIV/0!	#DIV/0!	#DIV/0!	#DIV/0!	#DIV/0!	#DIV/0!	#DIV/0!	#DIV/0!	#DIV/0!	#DIV/0!	#DIV/0!	#DIV/0!	#DIV/0!	#DIV/0!	#DIV/0!	#DIV/0!
555	HPF	HATA	HATA	589508447	Hippocampo-amygdalar transition area	#DIV/0!	#DIV/0!	#DIV/0!	#DIV/0!	#DIV/0!	#DIV/0!	#DIV/0!	#DIV/0!	#DIV/0!	#DIV/0!	#DIV/0!	#DIV/0!	#DIV/0!	#DIV/0!	#DIV/0!	#DIV/0!	#DIV/0!	#DIV/0!	#DIV/0!	#DIV/0!	#DIV/0!	#DIV/0!	#DIV/0!	#DIV/0!	#DIV/0!	#DIV/0!	#DIV/0!	#DIV/0!
556	HPF	APr	APr	484682508	Area prostriata	#DIV/0!	#DIV/0!	#DIV/0!	#DIV/0!	#DIV/0!	#DIV/0!	#DIV/0!	#DIV/0!	#DIV/0!	#DIV/0!	#DIV/0!	#DIV/0!	#DIV/0!	#DIV/0!	#DIV/0!	#DIV/0!	#DIV/0!	#DIV/0!	#DIV/0!	#DIV/0!	#DIV/0!	#DIV/0!	#DIV/0!	#DIV/0!	#DIV/0!	#DIV/0!	#DIV/0!	#DIV/0!
557	CTXsp	CTXsp	CTXsp	703	Cortical subplate	#DIV/0!	#DIV/0!	#DIV/0!	#DIV/0!	#DIV/0!	#DIV/0!	#DIV/0!	#DIV/0!	#DIV/0!	#DIV/0!	#DIV/0!	#DIV/0!	#DIV/0!	#DIV/0!	#DIV/0!	#DIV/0!	#DIV/0!	#DIV/0!	#DIV/0!	#DIV/0!	#DIV/0!	#DIV/0!	#DIV/0!	#DIV/0!	#DIV/0!	#DIV/0!	#DIV/0!	#DIV/0!
558	CTXsp	6b	6b	16	Layer 6b, isocortex	#DIV/0!	#DIV/0!	#DIV/0!	#DIV/0!	#DIV/0!	#DIV/0!	#DIV/0!	#DIV/0!	#DIV/0!	#DIV/0!	#DIV/0!	#DIV/0!	#DIV/0!	#DIV/0!	#DIV/0!	#DIV/0!	#DIV/0!	#DIV/0!	#DIV/0!	#DIV/0!	#DIV/0!	#DIV/0!	#DIV/0!	#DIV/0!	#DIV/0!	#DIV/0!	#DIV/0!	#DIV/0!
559	CTXsp	CLA	CLA	583	Claustrum	#DIV/0!	#DIV/0!	#DIV/0!	#DIV/0!	#DIV/0!	#DIV/0!	#DIV/0!	#DIV/0!	#DIV/0!	#DIV/0!	#DIV/0!	#DIV/0!	#DIV/0!	#DIV/0!	#DIV/0!	#DIV/0!	#DIV/0!	#DIV/0!	#DIV/0!	#DIV/0!	#DIV/0!	#DIV/0!	#DIV/0!	#DIV/0!	#DIV/0!	#DIV/0!	#DIV/0!	#DIV/0!
560	CTXsp	EP	EP	942	Endopiriform nucleus	#DIV/0!	#DIV/0!	#DIV/0!	#DIV/0!	#DIV/0!	#DIV/0!	#DIV/0!	#DIV/0!	#DIV/0!	#DIV/0!	#DIV/0!	#DIV/0!	#DIV/0!	#DIV/0!	#DIV/0!	#DIV/0!	#DIV/0!	#DIV/0!	#DIV/0!	#DIV/0!	#DIV/0!	#DIV/0!	#DIV/0!	#DIV/0!	#DIV/0!	#DIV/0!	#DIV/0!	#DIV/0!
561	CTXsp	EP	EPd	952	Endopiriform nucleus, dorsal part	#DIV/0!	#DIV/0!	#DIV/0!	#DIV/0!	#DIV/0!	#DIV/0!	0.0770575	#DIV/0!	#DIV/0!	#DIV/0!	#DIV/0!	#DIV/0!	#DIV/0!	#DIV/0!	#DIV/0!	#DIV/0!	#DIV/0!	#DIV/0!	#DIV/0!	#DIV/0!	0.0147882	0.0216944	#DIV/0!	#DIV/0!	#DIV/0!	#DIV/0!	#DIV/0!	#DIV/0!
562	CTXsp	EP	EPv	966	Endopiriform nucleus, ventral part	#DIV/0!	#DIV/0!	#DIV/0!	#DIV/0!	#DIV/0!	#DIV/0!	#DIV/0!	#DIV/0!	#DIV/0!	#DIV/0!	#DIV/0!	#DIV/0!	#DIV/0!	#DIV/0!	#DIV/0!	#DIV/0!	#DIV/0!	#DIV/0!	#DIV/0!	#DIV/0!	#DIV/0!	#DIV/0!	#DIV/0!	#DIV/0!	#DIV/0!	#DIV/0!	#DIV/0!	#DIV/0!
563	CTXsp	LA	LA	131	Lateral amygdalar nucleus	#DIV/0!	#DIV/0!	#DIV/0!	#DIV/0!	#DIV/0!	#DIV/0!	#DIV/0!	#DIV/0!	#DIV/0!	#DIV/0!	#DIV/0!	#DIV/0!	#DIV/0!	#DIV/0!	#DIV/0!	#DIV/0!	#DIV/0!	#DIV/0!	#DIV/0!	#DIV/0!	#DIV/0!	#DIV/0!	#DIV/0!	#DIV/0!	#DIV/0!	#DIV/0!	#DIV/0!	#DIV/0!
564	CTXsp	BLA	BLA	295	Basolateral amygdalar nucleus	#DIV/0!	#DIV/0!	#DIV/0!	#DIV/0!	#DIV/0!	#DIV/0!	#DIV/0!	#DIV/0!	#DIV/0!	#DIV/0!	#DIV/0!	#DIV/0!	#DIV/0!	#DIV/0!	#DIV/0!	#DIV/0!	#DIV/0!	#DIV/0!	#DIV/0!	#DIV/0!	#DIV/0!	#DIV/0!	#DIV/0!	#DIV/0!	#DIV/0!	#DIV/0!	#DIV/0!	#DIV/0!
565	CTXsp	BLA	BLAa	303	Basolateral amygdalar nucleus, anterior part	#DIV/0!	#DIV/0!	#DIV/0!	#DIV/0!	#DIV/0!	#DIV/0!	#DIV/0!	#DIV/0!	#DIV/0!	#DIV/0!	#DIV/0!	#DIV/0!	#DIV/0!	#DIV/0!	#DIV/0!	#DIV/0!	#DIV/0!	#DIV/0!	#DIV/0!	#DIV/0!	#DIV/0!	#DIV/0!	#DIV/0!	#DIV/0!	#DIV/0!	#DIV/0!	#DIV/0!	#DIV/0!
566	CTXsp	BLA	BLAp	311	Basolateral amygdalar nucleus, posterior part	#DIV/0!	#DIV/0!	#DIV/0!	#DIV/0!	#DIV/0!	#DIV/0!	#DIV/0!	#DIV/0!	#DIV/0!	#DIV/0!	#DIV/0!	#DIV/0!	#DIV/0!	#DIV/0!	#DIV/0!	#DIV/0!	#DIV/0!	#DIV/0!	#DIV/0!	#DIV/0!	#DIV/0!	#DIV/0!	#DIV/0!	#DIV/0!	#DIV/0!	#DIV/0!	#DIV/0!	#DIV/0!
567	CTXsp	BLA	BLAv	451	Basolateral amygdalar nucleus, ventral part	#DIV/0!	#DIV/0!	#DIV/0!	#DIV/0!	#DIV/0!	#DIV/0!	#DIV/0!	#DIV/0!	#DIV/0!	#DIV/0!	#DIV/0!	#DIV/0!	#DIV/0!	#DIV/0!	#DIV/0!	#DIV/0!	#DIV/0!	#DIV/0!	#DIV/0!	#DIV/0!	#DIV/0!	#DIV/0!	#DIV/0!	#DIV/0!	#DIV/0!	#DIV/0!	#DIV/0!	#DIV/0!
568	CTXsp	BMA	BMA	319	Basomedial amygdalar nucleus	#DIV/0!	#DIV/0!	#DIV/0!	#DIV/0!	#DIV/0!	#DIV/0!	#DIV/0!	#DIV/0!	#DIV/0!	#DIV/0!	#DIV/0!	#DIV/0!	#DIV/0!	#DIV/0!	#DIV/0!	#DIV/0!	#DIV/0!	#DIV/0!	#DIV/0!	#DIV/0!	#DIV/0!	#DIV/0!	#DIV/0!	#DIV/0!	#DIV/0!	#DIV/0!	#DIV/0!	#DIV/0!
569	CTXsp	BMA	BMAa	327	Basomedial amygdalar nucleus, anterior part	#DIV/0!	#DIV/0!	#DIV/0!	#DIV/0!	#DIV/0!	#DIV/0!	#DIV/0!	#DIV/0!	#DIV/0!	#DIV/0!	#DIV/0!	#DIV/0!	#DIV/0!	#DIV/0!	#DIV/0!	#DIV/0!	#DIV/0!	#DIV/0!	#DIV/0!	#DIV/0!	#DIV/0!	#DIV/0!	#DIV/0!	#DIV/0!	#DIV/0!	#DIV/0!	#DIV/0!	#DIV/0!
570	CTXsp	BMA	BMAp	334	Basomedial amygdalar nucleus, posterior part	#DIV/0!	#DIV/0!	#DIV/0!	#DIV/0!	#DIV/0!	#DIV/0!	#DIV/0!	#DIV/0!	#DIV/0!	#DIV/0!	#DIV/0!	#DIV/0!	#DIV/0!	#DIV/0!	#DIV/0!	#DIV/0!	#DIV/0!	#DIV/0!	#DIV/0!	#DIV/0!	#DIV/0!	#DIV/0!	#DIV/0!	#DIV/0!	#DIV/0!	#DIV/0!	#DIV/0!	#DIV/0!
571	CTXsp	PA	PA	780	Posterior amygdalar nucleus	#DIV/0!	#DIV/0!	#DIV/0!	#DIV/0!	#DIV/0!	#DIV/0!	#DIV/0!	#DIV/0!	#DIV/0!	#DIV/0!	#DIV/0!	#DIV/0!	#DIV/0!	#DIV/0!	#DIV/0!	#DIV/0!	#DIV/0!	#DIV/0!	#DIV/0!	#DIV/0!	#DIV/0!	#DIV/0!	#DIV/0!	#DIV/0!	#DIV/0!	#DIV/0!	#DIV/0!	#DIV/0!
572	CNU	CNU	CNU	623	Cerebral nuclei	#DIV/0!	#DIV/0!	#DIV/0!	#DIV/0!	#DIV/0!	#DIV/0!	#DIV/0!	#DIV/0!	#DIV/0!	#DIV/0!	#DIV/0!	#DIV/0!	#DIV/0!	#DIV/0!	#DIV/0!	#DIV/0!	#DIV/0!	#DIV/0!	#DIV/0!	#DIV/0!	#DIV/0!	#DIV/0!	#DIV/0!	#DIV/0!	#DIV/0!	#DIV/0!	#DIV/0!	#DIV/0!
573	CNU	STR	STR	477	Striatum	0.0137942	0.0325537	0.0215407	0.0309775	0.0486246	0.0598773	0.0694846	0.0541025	0.0863232	0.0785646	0.0947616	0.0825121	0.000869232	0.00056758	0.000399669	0.000338288	0.00734928	0.0088078	0.0086695	0.0074199	0.0118672	0.0169388	0.0250319	0.0173189	0.0263994	0.0326572	0.0241681	0.025278
574	CNU	STRd	STRd	485	Striatum dorsal region	#DIV/0!	#DIV/0!	#DIV/0!	#DIV/0!	#DIV/0!	#DIV/0!	#DIV/0!	#DIV/0!	#DIV/0!	#DIV/0!	#DIV/0!	#DIV/0!	#DIV/0!	#DIV/0!	#DIV/0!	#DIV/0!	#DIV/0!	#DIV/0!	#DIV/0!	#DIV/0!	#DIV/0!	#DIV/0!	#DIV/0!	#DIV/0!	#DIV/0!	#DIV/0!	#DIV/0!	#DIV/0!
575	CNU	CP	CP	672	Caudoputamen	0.0139316	0.0228296	0.0201758	0.0313821	0.0487443	0.03189	0.0745776	0.0540854	0.0531435	0.09246	0.0904422	0.0957362	0.000117525	0.000340017	0.000436777	0.00017658	0.00329533	0.00430592	0.0039828	0.00185386	0.00631461	0.0102903	0.0108107	0.0107128	0.0165272	0.0233739	0.0113473	0.0147311
576	CNU	STRv	STRv	493	Striatum ventral region	#DIV/0!	#DIV/0!	#DIV/0!	#DIV/0!	#DIV/0!	#DIV/0!	#DIV/0!	#DIV/0!	#DIV/0!	#DIV/0!	#DIV/0!	#DIV/0!	#DIV/0!	#DIV/0!	#DIV/0!	#DIV/0!	#DIV/0!	#DIV/0!	#DIV/0!	#DIV/0!	#DIV/0!	#DIV/0!	#DIV/0!	#DIV/0!	#DIV/0!	#DIV/0!	#DIV/0!	#DIV/0!
577	CNU	ACB	ACB	56	Nucleus accumbens	0.0111242	0.0289674	0.0173484	0.0403858	0.0680869	0.0651219	0.0847734	0.0657646	3.51114	0.107416	0.0968387	0.107424	0.000114556	0.000131106	0.000326081	0.000151486	0.00333003	0.00752739	0.00651319	0.00618308	0.00987917	0.0138832	0.011543	0.0160497	0.0199896	0.0244472	0.0170794	0.024609
578	CNU	FS	FS	998	Fundus of striatum	#DIV/0!	#DIV/0!	#DIV/0!	#DIV/0!	#DIV/0!	#DIV/0!	0.070617	#DIV/0!	0.000628461	#DIV/0!	#DIV/0!	#DIV/0!	#DIV/0!	#DIV/0!	#DIV/0!	#DIV/0!	#DIV/0!	#DIV/0!	#DIV/0!	#DIV/0!	0.0120515	0.0440587	#DIV/0!	#DIV/0!	#DIV/0!	#DIV/0!	#DIV/0!	#DIV/0!
579	CNU	OT	OT	754	Olfactory tubercle	0.00611104	0.0251073	0.00760837	0.0238565	0.0683931	0.0464447	0.0733142	0.0340313	0.0462444	0.0673561	0.0796119	0.0920513	0.000237606	0.000448049	0.000155013	0.000112437	0.00335524	0.00534297	0.00195573	0.00532521	0.0065685	0.00693674	0.011499	0.00925899	0.00986721	0.0115203	0.0171607	0.0170621
580	CNU	OT	isl	481	Islands of Calleja	#DIV/0!	#DIV/0!	#DIV/0!	#DIV/0!	#DIV/0!	#DIV/0!	#DIV/0!	#DIV/0!	#DIV/0!	#DIV/0!	#DIV/0!	#DIV/0!	#DIV/0!	#DIV/0!	#DIV/0!	#DIV/0!	#DIV/0!	#DIV/0!	#DIV/0!	#DIV/0!	#DIV/0!	#DIV/0!	#DIV/0!	#DIV/0!	#DIV/0!	#DIV/0!	#DIV/0!	#DIV/0!
581	CNU	OT	islm	489	Major island of Calleja	#DIV/0!	#DIV/0!	#DIV/0!	#DIV/0!	#DIV/0!	#DIV/0!	#DIV/0!	#DIV/0!	#DIV/0!	#DIV/0!	#DIV/0!	#DIV/0!	#DIV/0!	#DIV/0!	#DIV/0!	#DIV/0!	#DIV/0!	#DIV/0!	#DIV/0!	#DIV/0!	#DIV/0!	#DIV/0!	#DIV/0!	#DIV/0!	#DIV/0!	#DIV/0!	#DIV/0!	#DIV/0!
582	CNU	OT	OT1-3	144	Olfactory tubercle, layers 1-3	#DIV/0!	#DIV/0!	#DIV/0!	#DIV/0!	#DIV/0!	#DIV/0!	#DIV/0!	#DIV/0!	#DIV/0!	#DIV/0!	#DIV/0!	#DIV/0!	#DIV/0!	#DIV/0!	#DIV/0!	#DIV/0!	#DIV/0!	#DIV/0!	#DIV/0!	#DIV/0!	#DIV/0!	#DIV/0!	#DIV/0!	#DIV/0!	#DIV/0!	#DIV/0!	#DIV/0!	#DIV/0!
583	CNU	OT	OT1	458	Olfactory tubercle, molecular layer	#DIV/0!	#DIV/0!	#DIV/0!	#DIV/0!	#DIV/0!	#DIV/0!	#DIV/0!	#DIV/0!	#DIV/0!	#DIV/0!	#DIV/0!	#DIV/0!	#DIV/0!	#DIV/0!	#DIV/0!	#DIV/0!	#DIV/0!	#DIV/0!	#DIV/0!	#DIV/0!	#DIV/0!	#DIV/0!	#DIV/0!	#DIV/0!	#DIV/0!	#DIV/0!	#DIV/0!	#DIV/0!
584	CNU	OT	OT2	465	Olfactory tubercle, pyramidal layer	#DIV/0!	#DIV/0!	#DIV/0!	#DIV/0!	#DIV/0!	#DIV/0!	#DIV/0!	#DIV/0!	#DIV/0!	#DIV/0!	#DIV/0!	#DIV/0!	#DIV/0!	#DIV/0!	#DIV/0!	#DIV/0!	#DIV/0!	#DIV/0!	#DIV/0!	#DIV/0!	#DIV/0!	#DIV/0!	#DIV/0!	#DIV/0!	#DIV/0!	#DIV/0!	#DIV/0!	#DIV/0!
585	CNU	OT	OT3	473	Olfactory tubercle, polymorph layer	#DIV/0!	#DIV/0!	#DIV/0!	#DIV/0!	#DIV/0!	#DIV/0!	#DIV/0!	#DIV/0!	#DIV/0!	#DIV/0!	#DIV/0!	#DIV/0!	#DIV/0!	#DIV/0!	#DIV/0!	#DIV/0!	#DIV/0!	#DIV/0!	#DIV/0!	#DIV/0!	#DIV/0!	#DIV/0!	#DIV/0!	#DIV/0!	#DIV/0!	#DIV/0!	#DIV/0!	#DIV/0!
586	CNU	LSS	LSS	549009199	Lateral strip of striatum	#DIV/0!	#DIV/0!	#DIV/0!	#DIV/0!	#DIV/0!	#DIV/0!	#DIV/0!	#DIV/0!	#DIV/0!	#DIV/0!	#DIV/0!	#DIV/0!	#DIV/0!	#DIV/0!	#DIV/0!	#DIV/0!	#DIV/0!	#DIV/0!	#DIV/0!	#DIV/0!	#DIV/0!	#DIV/0!	#DIV/0!	#DIV/0!	#DIV/0!	#DIV/0!	#DIV/0!	#DIV/0!
587	CNU	LSX	LSX	275	Lateral septal complex	#DIV/0!	#DIV/0!	#DIV/0!	#DIV/0!	#DIV/0!	#DIV/0!	#DIV/0!	#DIV/0!	#DIV/0!	#DIV/0!	#DIV/0!	#DIV/0!	#DIV/0!	#DIV/0!	#DIV/0!	#DIV/0!	#DIV/0!	#DIV/0!	#DIV/0!	#DIV/0!	#DIV/0!	#DIV/0!	#DIV/0!	#DIV/0!	#DIV/0!	#DIV/0!	#DIV/0!	#DIV/0!
588	CNU	LSX	LS	242	Lateral septal nucleus	#DIV/0!	#DIV/0!	#DIV/0!	#DIV/0!	#DIV/0!	#DIV/0!	#DIV/0!	#DIV/0!	#DIV/0!	#DIV/0!	#DIV/0!	#DIV/0!	#DIV/0!	#DIV/0!	#DIV/0!	#DIV/0!	#DIV/0!	#DIV/0!	#DIV/0!	#DIV/0!	#DIV/0!	#DIV/0!	#DIV/0!	#DIV/0!	#DIV/0!	#DIV/0!	#DIV/0!	#DIV/0!
589	CNU	LSX	LSc	250	Lateral septal nucleus, caudal (caudodorsal) part	0.0195403	0.0150162	0.0115809	0.023348	0.0363799	0.0502886	0.0496594	0.0373186	0.073501	0.055281	0.0415942	0.0176018	0.000165648	0.000116905	0.000640777	0.000176455	0.00339534	0.00645782	0.00340538	0.0027276	#DIV/0!	0.00943256	0.0138762	0.00598239	0.00112372	0.0199574	0.0150622	0.0246248
590	CNU	LSX	LSr	258	Lateral septal nucleus, rostral (rostroventral) part	0.0167824	0.0255676	0.0117614	0.0371038	0.0626804	0.0726259	0.0826529	0.0706508	0.0887038	0.0745256	0.0886086	0.0821651	0.000199387	0.000285886	0.000447074	0.000183569	0.00385567	0.00532308	0.00702925	0.00386507	#DIV/0!	0.0111954	0.0124997	0.0133419	0.0184362	0.021979	0.0251392	0.0303307
591	CNU	LSX	LSv	266	Lateral septal nucleus, ventral part	0.0143882	0.0291313	0.0238164	0.0377851	0.0775515	0.083465	0.109733	0.0777491	0.0986204	0.0790034	0.0958497	0.103489	0.000173769	0.000177069	0.000310601	0.000223096	0.00764493	0.00800884	0.00864309	0.00550039	#DIV/0!	0.0199206	0.024779	0.019199	0.0260024	0.0343776	0.038212	0.0318042
592	CNU	LSX	SF	310	Septofimbrial nucleus	0.00943923	0.0161941	0.0134966	0.0209579	0.0606496	0.0405869	0.0389544	0.0450989	0.0901687	0.0589394	0.0611625	0.0430413	0.000469632	#DIV/0!	#DIV/0!	0.00162923	0.00529098	0.00790679	0.00850539	0.00451262	#DIV/0!	0.0184062	0.0191825	0.0143195	0.0162556	0.029108	0.0262124	0.0296854
593	CNU	LSX	SH	333	Septohippocampal nucleus	0.0438983	#DIV/0!	#DIV/0!	#DIV/0!	#DIV/0!	#DIV/0!	#DIV/0!	#DIV/0!	#DIV/0!	#DIV/0!	#DIV/0!	#DIV/0!	#DIV/0!	#DIV/0!	#DIV/0!	#DIV/0!	#DIV/0!	#DIV/0!	#DIV/0!	#DIV/0!	#DIV/0!	#DIV/0!	0.00712548	#DIV/0!	#DIV/0!	#DIV/0!	#DIV/0!	#DIV/0!
594	CNU	sAMY	sAMY	278	Striatum-like amygdalar nuclei	#DIV/0!	#DIV/0!	#DIV/0!	#DIV/0!	#DIV/0!	#DIV/0!	#DIV/0!	#DIV/0!	#DIV/0!	#DIV/0!	#DIV/0!	#DIV/0!	#DIV/0!	#DIV/0!	#DIV/0!	#DIV/0!	#DIV/0!	#DIV/0!	#DIV/0!	#DIV/0!	#DIV/0!	#DIV/0!	#DIV/0!	#DIV/0!	#DIV/0!	#DIV/0!	#DIV/0!	#DIV/0!
595	CNU	sAMY	AAA	23	Anterior amygdalar area	#DIV/0!	#DIV/0!	#DIV/0!	#DIV/0!	#DIV/0!	#DIV/0!	#DIV/0!	#DIV/0!	#DIV/0!	#DIV/0!	#DIV/0!	#DIV/0!	#DIV/0!	#DIV/0!	#DIV/0!	#DIV/0!	#DIV/0!	#DIV/0!	#DIV/0!	#DIV/0!	0.00949628	#DIV/0!	#DIV/0!	#DIV/0!	#DIV/0!	#DIV/0!	#DIV/0!	#DIV/0!
596	CNU	sAMY	BA	292	Bed nucleus of the accessory olfactory tract	#DIV/0!	#DIV/0!	#DIV/0!	#DIV/0!	#DIV/0!	#DIV/0!	#DIV/0!	#DIV/0!	#DIV/0!	#DIV/0!	#DIV/0!	#DIV/0!	#DIV/0!	#DIV/0!	#DIV/0!	#DIV/0!	#DIV/0!	#DIV/0!	#DIV/0!	#DIV/0!	#DIV/0!	#DIV/0!	#DIV/0!	#DIV/0!	#DIV/0!	#DIV/0!	#DIV/0!	#DIV/0!
597	CNU	sAMY	CEA	536	Central amygdalar nucleus	#DIV/0!	#DIV/0!	#DIV/0!	#DIV/0!	#DIV/0!	#DIV/0!	#DIV/0!	#DIV/0!	#DIV/0!	#DIV/0!	#DIV/0!	#DIV/0!	#DIV/0!	#DIV/0!	#DIV/0!	#DIV/0!	#DIV/0!	#DIV/0!	#DIV/0!	#DIV/0!	#DIV/0!	#DIV/0!	#DIV/0!	#DIV/0!	#DIV/0!	#DIV/0!	#DIV/0!	#DIV/0!
598	CNU	sAMY	CEAc	544	Central amygdalar nucleus, capsular part	#DIV/0!	#DIV/0!	#DIV/0!	#DIV/0!	#DIV/0!	#DIV/0!	#DIV/0!	#DIV/0!	#DIV/0!	#DIV/0!	#DIV/0!	#DIV/0!	#DIV/0!	#DIV/0!	#DIV/0!	#DIV/0!	#DIV/0!	#DIV/0!	#DIV/0!	#DIV/0!	#DIV/0!	#DIV/0!	#DIV/0!	#DIV/0!	#DIV/0!	#DIV/0!	#DIV/0!	#DIV/0!
599	CNU	sAMY	CEAl	551	Central amygdalar nucleus, lateral part	#DIV/0!	#DIV/0!	#DIV/0!	#DIV/0!	#DIV/0!	#DIV/0!	#DIV/0!	#DIV/0!	#DIV/0!	#DIV/0!	#DIV/0!	#DIV/0!	#DIV/0!	#DIV/0!	#DIV/0!	#DIV/0!	#DIV/0!	#DIV/0!	#DIV/0!	#DIV/0!	#DIV/0!	#DIV/0!	#DIV/0!	#DIV/0!	#DIV/0!	#DIV/0!	#DIV/0!	#DIV/0!
600	CNU	sAMY	CEAm	559	Central amygdalar nucleus, medial part	#DIV/0!	#DIV/0!	#DIV/0!	#DIV/0!	#DIV/0!	#DIV/0!	#DIV/0!	#DIV/0!	#DIV/0!	#DIV/0!	#DIV/0!	#DIV/0!	#DIV/0!	#DIV/0!	#DIV/0!	#DIV/0!	#DIV/0!	#DIV/0!	#DIV/0!	#DIV/0!	#DIV/0!	#DIV/0!	#DIV/0!	#DIV/0!	#DIV/0!	#DIV/0!	#DIV/0!	#DIV/0!
601	CNU	sAMY	IA	1105	Intercalated amygdalar nucleus	#DIV/0!	#DIV/0!	#DIV/0!	#DIV/0!	#DIV/0!	#DIV/0!	#DIV/0!	#DIV/0!	#DIV/0!	#DIV/0!	#DIV/0!	#DIV/0!	#DIV/0!	#DIV/0!	#DIV/0!	#DIV/0!	#DIV/0!	#DIV/0!	#DIV/0!	#DIV/0!	#DIV/0!	#DIV/0!	#DIV/0!	#DIV/0!	#DIV/0!	#DIV/0!	#DIV/0!	#DIV/0!
602	CNU	sAMY	MEA	403	Medial amygdalar nucleus	#DIV/0!	#DIV/0!	#DIV/0!	#DIV/0!	#DIV/0!	#DIV/0!	#DIV/0!	#DIV/0!	#DIV/0!	#DIV/0!	#DIV/0!	#DIV/0!	#DIV/0!	#DIV/0!	#DIV/0!	#DIV/0!	#DIV/0!	#DIV/0!	#DIV/0!	#DIV/0!	0.00939524	#DIV/0!	#DIV/0!	#DIV/0!	#DIV/0!	#DIV/0!	#DIV/0!	#DIV/0!
603	CNU	sAMY	MEAad	411	Medial amygdalar nucleus, anterodorsal part	#DIV/0!	#DIV/0!	#DIV/0!	#DIV/0!	#DIV/0!	#DIV/0!	#DIV/0!	#DIV/0!	#DIV/0!	#DIV/0!	#DIV/0!	#DIV/0!	#DIV/0!	#DIV/0!	#DIV/0!	#DIV/0!	#DIV/0!	#DIV/0!	#DIV/0!	#DIV/0!	#DIV/0!	#DIV/0!	#DIV/0!	#DIV/0!	#DIV/0!	#DIV/0!	#DIV/0!	#DIV/0!
604	CNU	sAMY	MEAav	418	Medial amygdalar nucleus, anteroventral part	#DIV/0!	#DIV/0!	#DIV/0!	#DIV/0!	#DIV/0!	#DIV/0!	#DIV/0!	#DIV/0!	#DIV/0!	#DIV/0!	#DIV/0!	#DIV/0!	#DIV/0!	#DIV/0!	#DIV/0!	#DIV/0!	#DIV/0!	#DIV/0!	#DIV/0!	#DIV/0!	#DIV/0!	#DIV/0!	#DIV/0!	#DIV/0!	#DIV/0!	#DIV/0!	#DIV/0!	#DIV/0!
605	CNU	sAMY	MEApd	426	Medial amygdalar nucleus, posterodorsal part	#DIV/0!	#DIV/0!	#DIV/0!	#DIV/0!	#DIV/0!	#DIV/0!	#DIV/0!	#DIV/0!	#DIV/0!	#DIV/0!	#DIV/0!	#DIV/0!	#DIV/0!	#DIV/0!	#DIV/0!	#DIV/0!	#DIV/0!	#DIV/0!	#DIV/0!	#DIV/0!	#DIV/0!	#DIV/0!	#DIV/0!	#DIV/0!	#DIV/0!	#DIV/0!	#DIV/0!	#DIV/0!
606	CNU	sAMY	MEApd-a	472	Medial amygdalar nucleus, posterodorsal part, sublayer a	#DIV/0!	#DIV/0!	#DIV/0!	#DIV/0!	#DIV/0!	#DIV/0!	#DIV/0!	#DIV/0!	#DIV/0!	#DIV/0!	#DIV/0!	#DIV/0!	#DIV/0!	#DIV/0!	#DIV/0!	#DIV/0!	#DIV/0!	#DIV/0!	#DIV/0!	#DIV/0!	#DIV/0!	#DIV/0!	#DIV/0!	#DIV/0!	#DIV/0!	#DIV/0!	#DIV/0!	#DIV/0!
607	CNU	sAMY	MEApd-b	480	Medial amygdalar nucleus, posterodorsal part, sublayer b	#DIV/0!	#DIV/0!	#DIV/0!	#DIV/0!	#DIV/0!	#DIV/0!	#DIV/0!	#DIV/0!	#DIV/0!	#DIV/0!	#DIV/0!	#DIV/0!	#DIV/0!	#DIV/0!	#DIV/0!	#DIV/0!	#DIV/0!	#DIV/0!	#DIV/0!	#DIV/0!	#DIV/0!	#DIV/0!	#DIV/0!	#DIV/0!	#DIV/0!	#DIV/0!	#DIV/0!	#DIV/0!
608	CNU	sAMY	MEApd-c	487	Medial amygdalar nucleus, posterodorsal part, sublayer c	#DIV/0!	#DIV/0!	#DIV/0!	#DIV/0!	#DIV/0!	#DIV/0!	#DIV/0!	#DIV/0!	#DIV/0!	#DIV/0!	#DIV/0!	#DIV/0!	#DIV/0!	#DIV/0!	#DIV/0!	#DIV/0!	#DIV/0!	#DIV/0!	#DIV/0!	#DIV/0!	#DIV/0!	#DIV/0!	#DIV/0!	#DIV/0!	#DIV/0!	#DIV/0!	#DIV/0!	#DIV/0!
609	CNU	sAMY	MEApv	435	Medial amygdalar nucleus, posteroventral part	#DIV/0!	#DIV/0!	#DIV/0!	#DIV/0!	#DIV/0!	#DIV/0!	#DIV/0!	#DIV/0!	#DIV/0!	#DIV/0!	#DIV/0!	#DIV/0!	#DIV/0!	#DIV/0!	#DIV/0!	#DIV/0!	#DIV/0!	#DIV/0!	#DIV/0!	#DIV/0!	#DIV/0!	#DIV/0!	#DIV/0!	#DIV/0!	#DIV/0!	#DIV/0!	#DIV/0!	#DIV/0!
610	CNU	PAL	PAL	803	Pallidum	0.0237304	0.029919	0.0113148	0.0414375	0.0570436	0.05307	0.0509778	0.0260441	0.115644	0.0563237	0.0810474	0.0719117	#DIV/0!	#DIV/0!	0.000682028	0.00110822	0.00549751	0.0128762	0.00513077	0.0137642	0.0176536	0.0257951	0.0193218	0.0299213	0.0197439	0.0143782	0.0269148	0.0176525
611	CNU	PALd	PALd	818	Pallidum, dorsal region	#DIV/0!	#DIV/0!	#DIV/0!	#DIV/0!	#DIV/0!	#DIV/0!	#DIV/0!	#DIV/0!	#DIV/0!	#DIV/0!	#DIV/0!	#DIV/0!	#DIV/0!	#DIV/0!	#DIV/0!	#DIV/0!	#DIV/0!	#DIV/0!	#DIV/0!	#DIV/0!	#DIV/0!	#DIV/0!	#DIV/0!	#DIV/0!	#DIV/0!	#DIV/0!	#DIV/0!	#DIV/0!
612	CNU	PALd	GPe	1022	Globus pallidus, external segment	#DIV/0!	#DIV/0!	#DIV/0!	#DIV/0!	#DIV/0!	#DIV/0!	0.062805	#DIV/0!	#DIV/0!	#DIV/0!	#DIV/0!	#DIV/0!	#DIV/0!	#DIV/0!	#DIV/0!	#DIV/0!	#DIV/0!	#DIV/0!	#DIV/0!	#DIV/0!	0.00706574	0.0542751	#DIV/0!	#DIV/0!	#DIV/0!	#DIV/0!	#DIV/0!	#DIV/0!
613	CNU	PALd	GPi	1031	Globus pallidus, internal segment	#DIV/0!	#DIV/0!	#DIV/0!	#DIV/0!	#DIV/0!	#DIV/0!	#DIV/0!	#DIV/0!	#DIV/0!	#DIV/0!	#DIV/0!	#DIV/0!	#DIV/0!	#DIV/0!	#DIV/0!	#DIV/0!	#DIV/0!	#DIV/0!	#DIV/0!	#DIV/0!	#DIV/0!	#DIV/0!	#DIV/0!	#DIV/0!	#DIV/0!	#DIV/0!	#DIV/0!	#DIV/0!
614	CNU	PALv	PALv	835	Pallidum, ventral region	#DIV/0!	#DIV/0!	#DIV/0!	#DIV/0!	#DIV/0!	#DIV/0!	#DIV/0!	#DIV/0!	#DIV/0!	#DIV/0!	#DIV/0!	#DIV/0!	#DIV/0!	#DIV/0!	#DIV/0!	#DIV/0!	#DIV/0!	#DIV/0!	#DIV/0!	#DIV/0!	#DIV/0!	#DIV/0!	#DIV/0!	#DIV/0!	#DIV/0!	#DIV/0!	#DIV/0!	#DIV/0!
615	CNU	PALv	SI	342	Substantia innominata	0.0165074	0.0426143	0.0166716	0.0351432	0.0639169	0.0652947	0.0704994	0.0527743	0.268838	0.0996426	0.0869731	0.09184	0.00028372	0.000302066	0.000695476	0.000175534	0.00572835	0.0118283	0.0150771	0.0149838	0.0257737	0.022382	0.0230729	0.0201454	0.0309907	0.0343672	0.030156	0.0353512
616	CNU	PALv	MA	298	Magnocellular nucleus	0.00639159	#DIV/0!	0.0355338	0.0609604	0.101667	#DIV/0!	0.0990024	0.0431483	#DIV/0!	#DIV/0!	0.106456	0.109213	#DIV/0!	#DIV/0!	#DIV/0!	#DIV/0!	#DIV/0!	0.0297215	0.0128765	#DIV/0!	0.0239125	0.0307738	#DIV/0!	0.0186029	0.0291211	0.0197089	#DIV/0!	#DIV/0!
617	CNU	PALm	PALm	826	Pallidum, medial region	#DIV/0!	#DIV/0!	#DIV/0!	#DIV/0!	#DIV/0!	#DIV/0!	#DIV/0!	#DIV/0!	#DIV/0!	#DIV/0!	#DIV/0!	#DIV/0!	#DIV/0!	#DIV/0!	#DIV/0!	#DIV/0!	#DIV/0!	#DIV/0!	#DIV/0!	#DIV/0!	#DIV/0!	#DIV/0!	#DIV/0!	#DIV/0!	#DIV/0!	#DIV/0!	#DIV/0!	#DIV/0!
618	CNU	PALm	MSC	904	Medial septal complex	#DIV/0!	#DIV/0!	#DIV/0!	#DIV/0!	#DIV/0!	#DIV/0!	#DIV/0!	#DIV/0!	#DIV/0!	#DIV/0!	#DIV/0!	#DIV/0!	#DIV/0!	#DIV/0!	#DIV/0!	#DIV/0!	#DIV/0!	#DIV/0!	#DIV/0!	#DIV/0!	#DIV/0!	#DIV/0!	#DIV/0!	#DIV/0!	#DIV/0!	#DIV/0!	#DIV/0!	#DIV/0!
619	CNU	PALm	MS	564	Medial septal nucleus	0.0381712	#DIV/0!	#DIV/0!	#DIV/0!	#DIV/0!	#DIV/0!	#DIV/0!	#DIV/0!	#DIV/0!	#DIV/0!	#DIV/0!	#DIV/0!	#DIV/0!	#DIV/0!	#DIV/0!	#DIV/0!	#DIV/0!	#DIV/0!	#DIV/0!	#DIV/0!	#DIV/0!	#DIV/0!	#DIV/0!	#DIV/0!	#DIV/0!	#DIV/0!	#DIV/0!	#DIV/0!
620	CNU	PALm	NDB	596	Diagonal band nucleus	0.0193624	0.0403385	0.020273	0.0611123	0.0887428	0.0807593	0.0998612	0.0440121	0.107632	0.105127	0.104929	0.10185	0.000343563	0.00110346	0.000150111	0.000950755	0.0107574	0.0250924	0.0167786	0.0159248	0.0298048	0.0228136	0.0431868	0.0300909	0.0385182	0.0452633	0.04952	0.0376992
621	CNU	PALm	TRS	581	Triangular nucleus of septum	0.0164187	0.0303644	0.0140089	0.041729	0.079537	0.0857149	0.0294767	0.0659427	0.101011	0.0846178	0.0878284	0.0847326	7.59965e-05	#DIV/0!	0.00112332	0.00188596	0.00733156	0.0276888	0.0180292	0.00811829	#DIV/0!	0.0447835	0.0295485	0.0142516	0.0246765	0.0732143	0.0498072	0.0381827
622	CNU	PALc	PALc	809	Pallidum, caudal region	#DIV/0!	#DIV/0!	#DIV/0!	#DIV/0!	#DIV/0!	#DIV/0!	#DIV/0!	#DIV/0!	#DIV/0!	#DIV/0!	#DIV/0!	#DIV/0!	#DIV/0!	#DIV/0!	#DIV/0!	#DIV/0!	#DIV/0!	#DIV/0!	#DIV/0!	#DIV/0!	#DIV/0!	#DIV/0!	#DIV/0!	#DIV/0!	#DIV/0!	#DIV/0!	#DIV/0!	#DIV/0!
623	CNU	PALc	BST	351	Bed nuclei of the stria terminalis	0.0160956	0.0334401	0.0296364	0.0437759	0.0693068	0.0684888	0.0705629	0.0655091	0.0853559	0.0882831	0.0805588	0.0897234	0.000436969	0.000640788	0.000603633	0.00171971	0.0175101	0.0202956	0.0235221	0.0202387	0.0374953	0.0237428	0.0320544	0.0346299	0.0479946	0.0455678	0.0469935	0.0455963
624	CNU	PALc	BSTa	359	Bed nuclei of the stria terminalis, anterior division	#DIV/0!	#DIV/0!	#DIV/0!	#DIV/0!	#DIV/0!	#DIV/0!	#DIV/0!	#DIV/0!	#DIV/0!	#DIV/0!	#DIV/0!	#DIV/0!	#DIV/0!	#DIV/0!	#DIV/0!	#DIV/0!	#DIV/0!	#DIV/0!	#DIV/0!	#DIV/0!	#DIV/0!	#DIV/0!	#DIV/0!	#DIV/0!	#DIV/0!	#DIV/0!	#DIV/0!	#DIV/0!
625	CNU	PALc	BSTal	537	Bed nuclei of the stria terminalis, anterior division, anterolateral area	#DIV/0!	#DIV/0!	#DIV/0!	#DIV/0!	#DIV/0!	#DIV/0!	#DIV/0!	#DIV/0!	#DIV/0!	#DIV/0!	#DIV/0!	#DIV/0!	#DIV/0!	#DIV/0!	#DIV/0!	#DIV/0!	#DIV/0!	#DIV/0!	#DIV/0!	#DIV/0!	#DIV/0!	#DIV/0!	#DIV/0!	#DIV/0!	#DIV/0!	#DIV/0!	#DIV/0!	#DIV/0!
626	CNU	PALc	BSTam	498	Bed nuclei of the stria terminalis, anterior division, anteromedial area	#DIV/0!	#DIV/0!	#DIV/0!	#DIV/0!	#DIV/0!	#DIV/0!	#DIV/0!	#DIV/0!	#DIV/0!	#DIV/0!	#DIV/0!	#DIV/0!	#DIV/0!	#DIV/0!	#DIV/0!	#DIV/0!	#DIV/0!	#DIV/0!	#DIV/0!	#DIV/0!	#DIV/0!	#DIV/0!	#DIV/0!	#DIV/0!	#DIV/0!	#DIV/0!	#DIV/0!	#DIV/0!
627	CNU	PALc	BSTdm	505	Bed nuclei of the stria terminalis, anterior division, dorsomedial nucleus	#DIV/0!	#DIV/0!	#DIV/0!	#DIV/0!	#DIV/0!	#DIV/0!	#DIV/0!	#DIV/0!	#DIV/0!	#DIV/0!	#DIV/0!	#DIV/0!	#DIV/0!	#DIV/0!	#DIV/0!	#DIV/0!	#DIV/0!	#DIV/0!	#DIV/0!	#DIV/0!	#DIV/0!	#DIV/0!	#DIV/0!	#DIV/0!	#DIV/0!	#DIV/0!	#DIV/0!	#DIV/0!
628	CNU	PALc	BSTfu	513	Bed nuclei of the stria terminalis, anterior division, fusiform nucleus	#DIV/0!	#DIV/0!	#DIV/0!	#DIV/0!	#DIV/0!	#DIV/0!	#DIV/0!	#DIV/0!	#DIV/0!	#DIV/0!	#DIV/0!	#DIV/0!	#DIV/0!	#DIV/0!	#DIV/0!	#DIV/0!	#DIV/0!	#DIV/0!	#DIV/0!	#DIV/0!	#DIV/0!	#DIV/0!	#DIV/0!	#DIV/0!	#DIV/0!	#DIV/0!	#DIV/0!	#DIV/0!
629	CNU	PALc	BSTju	546	Bed nuclei of the stria terminalis, anterior division, juxtacapsular nucleus	#DIV/0!	#DIV/0!	#DIV/0!	#DIV/0!	#DIV/0!	#DIV/0!	#DIV/0!	#DIV/0!	#DIV/0!	#DIV/0!	#DIV/0!	#DIV/0!	#DIV/0!	#DIV/0!	#DIV/0!	#DIV/0!	#DIV/0!	#DIV/0!	#DIV/0!	#DIV/0!	#DIV/0!	#DIV/0!	#DIV/0!	#DIV/0!	#DIV/0!	#DIV/0!	#DIV/0!	#DIV/0!
630	CNU	PALc	BSTmg	521	Bed nuclei of the stria terminalis, anterior division, magnocellular nucleus	#DIV/0!	#DIV/0!	#DIV/0!	#DIV/0!	#DIV/0!	#DIV/0!	#DIV/0!	#DIV/0!	#DIV/0!	#DIV/0!	#DIV/0!	#DIV/0!	#DIV/0!	#DIV/0!	#DIV/0!	#DIV/0!	#DIV/0!	#DIV/0!	#DIV/0!	#DIV/0!	#DIV/0!	#DIV/0!	#DIV/0!	#DIV/0!	#DIV/0!	#DIV/0!	#DIV/0!	#DIV/0!
631	CNU	PALc	BSTov	554	Bed nuclei of the stria terminalis, anterior division, oval nucleus	#DIV/0!	#DIV/0!	#DIV/0!	#DIV/0!	#DIV/0!	#DIV/0!	#DIV/0!	#DIV/0!	#DIV/0!	#DIV/0!	#DIV/0!	#DIV/0!	#DIV/0!	#DIV/0!	#DIV/0!	#DIV/0!	#DIV/0!	#DIV/0!	#DIV/0!	#DIV/0!	#DIV/0!	#DIV/0!	#DIV/0!	#DIV/0!	#DIV/0!	#DIV/0!	#DIV/0!	#DIV/0!
632	CNU	PALc	BSTrh	562	Bed nuclei of the stria terminalis, anterior division, rhomboid nucleus	#DIV/0!	#DIV/0!	#DIV/0!	#DIV/0!	#DIV/0!	#DIV/0!	#DIV/0!	#DIV/0!	#DIV/0!	#DIV/0!	#DIV/0!	#DIV/0!	#DIV/0!	#DIV/0!	#DIV/0!	#DIV/0!	#DIV/0!	#DIV/0!	#DIV/0!	#DIV/0!	#DIV/0!	#DIV/0!	#DIV/0!	#DIV/0!	#DIV/0!	#DIV/0!	#DIV/0!	#DIV/0!
633	CNU	PALc	BSTv	529	Bed nuclei of the stria terminalis, anterior division, ventral nucleus	#DIV/0!	#DIV/0!	#DIV/0!	#DIV/0!	#DIV/0!	#DIV/0!	#DIV/0!	#DIV/0!	#DIV/0!	#DIV/0!	#DIV/0!	#DIV/0!	#DIV/0!	#DIV/0!	#DIV/0!	#DIV/0!	#DIV/0!	#DIV/0!	#DIV/0!	#DIV/0!	#DIV/0!	#DIV/0!	#DIV/0!	#DIV/0!	#DIV/0!	#DIV/0!	#DIV/0!	#DIV/0!
634	CNU	PALc	BSTp	367	Bed nuclei of the stria terminalis, posterior division	#DIV/0!	#DIV/0!	#DIV/0!	#DIV/0!	#DIV/0!	#DIV/0!	#DIV/0!	#DIV/0!	#DIV/0!	#DIV/0!	#DIV/0!	#DIV/0!	#DIV/0!	#DIV/0!	#DIV/0!	#DIV/0!	#DIV/0!	#DIV/0!	#DIV/0!	#DIV/0!	#DIV/0!	#DIV/0!	#DIV/0!	#DIV/0!	#DIV/0!	#DIV/0!	#DIV/0!	#DIV/0!
635	CNU	PALc	BSTd	569	Bed nuclei of the stria terminalis, posterior division, dorsal nucleus	#DIV/0!	#DIV/0!	#DIV/0!	#DIV/0!	#DIV/0!	#DIV/0!	#DIV/0!	#DIV/0!	#DIV/0!	#DIV/0!	#DIV/0!	#DIV/0!	#DIV/0!	#DIV/0!	#DIV/0!	#DIV/0!	#DIV/0!	#DIV/0!	#DIV/0!	#DIV/0!	#DIV/0!	#DIV/0!	#DIV/0!	#DIV/0!	#DIV/0!	#DIV/0!	#DIV/0!	#DIV/0!
636	CNU	PALc	BSTpr	578	Bed nuclei of the stria terminalis, posterior division, principal nucleus	#DIV/0!	#DIV/0!	#DIV/0!	#DIV/0!	#DIV/0!	#DIV/0!	#DIV/0!	#DIV/0!	#DIV/0!	#DIV/0!	#DIV/0!	#DIV/0!	#DIV/0!	#DIV/0!	#DIV/0!	#DIV/0!	#DIV/0!	#DIV/0!	#DIV/0!	#DIV/0!	#DIV/0!	#DIV/0!	#DIV/0!	#DIV/0!	#DIV/0!	#DIV/0!	#DIV/0!	#DIV/0!
637	CNU	PALc	BSTif	585	Bed nuclei of the stria terminalis, posterior division, interfascicular nucleus	#DIV/0!	#DIV/0!	#DIV/0!	#DIV/0!	#DIV/0!	#DIV/0!	#DIV/0!	#DIV/0!	#DIV/0!	#DIV/0!	#DIV/0!	#DIV/0!	#DIV/0!	#DIV/0!	#DIV/0!	#DIV/0!	#DIV/0!	#DIV/0!	#DIV/0!	#DIV/0!	#DIV/0!	#DIV/0!	#DIV/0!	#DIV/0!	#DIV/0!	#DIV/0!	#DIV/0!	#DIV/0!
638	CNU	PALc	BSTtr	594	Bed nuclei of the stria terminalis, posterior division, transverse nucleus	#DIV/0!	#DIV/0!	#DIV/0!	#DIV/0!	#DIV/0!	#DIV/0!	#DIV/0!	#DIV/0!	#DIV/0!	#DIV/0!	#DIV/0!	#DIV/0!	#DIV/0!	#DIV/0!	#DIV/0!	#DIV/0!	#DIV/0!	#DIV/0!	#DIV/0!	#DIV/0!	#DIV/0!	#DIV/0!	#DIV/0!	#DIV/0!	#DIV/0!	#DIV/0!	#DIV/0!	#DIV/0!
639	CNU	PALc	BSTse	602	Bed nuclei of the stria terminalis, posterior division, strial extension	#DIV/0!	#DIV/0!	#DIV/0!	#DIV/0!	#DIV/0!	#DIV/0!	#DIV/0!	#DIV/0!	#DIV/0!	#DIV/0!	#DIV/0!	#DIV/0!	#DIV/0!	#DIV/0!	#DIV/0!	#DIV/0!	#DIV/0!	#DIV/0!	#DIV/0!	#DIV/0!	#DIV/0!	#DIV/0!	#DIV/0!	#DIV/0!	#DIV/0!	#DIV/0!	#DIV/0!	#DIV/0!
640	CNU	PALc	BAC	287	Bed nucleus of the anterior commissure	0.00786907	0.053781	0.0491776	0.0171438	0.084759	0.101456	0.0532738	0.0314661	0.0411342	0.0326857	0.110396	0.083902	#DIV/0!	0.00145673	#DIV/0!	0.00207753	0.00521711	0.00809177	0.0257787	0.00630346	#DIV/0!	0.0300357	0.0028542	0.00259379	0.0312416	0.0228081	0.0487853	0.00991893
641	BS	BS	BS	343	Brain stem	#DIV/0!	#DIV/0!	#DIV/0!	#DIV/0!	#DIV/0!	#DIV/0!	#DIV/0!	#DIV/0!	#DIV/0!	#DIV/0!	#DIV/0!	#DIV/0!	#DIV/0!	#DIV/0!	#DIV/0!	#DIV/0!	#DIV/0!	#DIV/0!	#DIV/0!	#DIV/0!	#DIV/0!	#DIV/0!	#DIV/0!	#DIV/0!	#DIV/0!	#DIV/0!	#DIV/0!	#DIV/0!
642	BS	IB	IB	1129	Interbrain	#DIV/0!	#DIV/0!	#DIV/0!	#DIV/0!	#DIV/0!	#DIV/0!	#DIV/0!	#DIV/0!	#DIV/0!	#DIV/0!	#DIV/0!	#DIV/0!	#DIV/0!	#DIV/0!	#DIV/0!	#DIV/0!	#DIV/0!	#DIV/0!	#DIV/0!	#DIV/0!	#DIV/0!	#DIV/0!	#DIV/0!	#DIV/0!	#DIV/0!	#DIV/0!	#DIV/0!	#DIV/0!
643	TH	TH	TH	549	Thalamus	0.0311729	0.0441854	0.0275807	0.0498915	0.0703214	0.0732633	0.0766694	0.0665648	0.0981899	0.113422	0.0910446	0.111286	0.00123493	0.000630027	0.00131983	0.00361282	0.00863535	0.0136957	0.0126107	0.0116378	0.0141729	0.0144559	0.0224775	0.0271388	0.0221243	0.0430942	0.0407576	0.0310928
644	TH	DORsm	DORsm	864	Thalamus, sensory-motor cortex related	#DIV/0!	#DIV/0!	#DIV/0!	#DIV/0!	#DIV/0!	#DIV/0!	#DIV/0!	#DIV/0!	#DIV/0!	#DIV/0!	#DIV/0!	#DIV/0!	#DIV/0!	#DIV/0!	#DIV/0!	#DIV/0!	#DIV/0!	#DIV/0!	#DIV/0!	#DIV/0!	#DIV/0!	#DIV/0!	#DIV/0!	#DIV/0!	#DIV/0!	#DIV/0!	#DIV/0!	#DIV/0!
645	TH	DORsm	VENT	637	Ventral group of the dorsal thalamus	#DIV/0!	#DIV/0!	#DIV/0!	#DIV/0!	#DIV/0!	#DIV/0!	#DIV/0!	#DIV/0!	#DIV/0!	#DIV/0!	#DIV/0!	#DIV/0!	#DIV/0!	#DIV/0!	#DIV/0!	#DIV/0!	#DIV/0!	#DIV/0!	#DIV/0!	#DIV/0!	#DIV/0!	#DIV/0!	#DIV/0!	#DIV/0!	#DIV/0!	#DIV/0!	#DIV/0!	#DIV/0!
646	TH	DORsm	VAL	629	Ventral anterior-lateral complex of the thalamus	0.0307429	0.0647552	0.0333875	0.0477799	0.0838155	0.0937655	0.0861931	0.0814424	0.254376	0.130674	0.127508	0.136139	0.00124026	0.000600502	0.000767395	0.00124614	0.0127019	0.0145106	0.0177098	0.0107202	0.0174264	0.0167058	0.0257136	0.0282818	0.0302215	0.0355984	0.0422032	0.0335824
647	TH	DORsm	VM	685	Ventral medial nucleus of the thalamus	0.0293991	0.0408875	0.0247251	0.0512182	0.0731104	0.0817094	0.0768354	0.0755984	0.121128	0.10825	0.0992654	0.113933	0.000964421	0.000874508	0.000805716	0.000761188	0.0119722	0.0148601	0.0143494	0.0169133	0.0182672	0.0137431	0.0359838	0.0334361	0.0274375	0.0326151	0.037552	0.0316442
648	TH	DORsm	VP	709	Ventral posterior complex of the thalamus	#DIV/0!	#DIV/0!	#DIV/0!	#DIV/0!	#DIV/0!	#DIV/0!	#DIV/0!	#DIV/0!	#DIV/0!	#DIV/0!	#DIV/0!	#DIV/0!	#DIV/0!	#DIV/0!	#DIV/0!	#DIV/0!	#DIV/0!	#DIV/0!	#DIV/0!	#DIV/0!	#DIV/0!	#DIV/0!	#DIV/0!	#DIV/0!	#DIV/0!	#DIV/0!	#DIV/0!	#DIV/0!
649	TH	DORsm	VPL	718	Ventral posterolateral nucleus of the thalamus	#DIV/0!	#DIV/0!	#DIV/0!	#DIV/0!	#DIV/0!	#DIV/0!	#DIV/0!	#DIV/0!	#DIV/0!	#DIV/0!	#DIV/0!	#DIV/0!	#DIV/0!	#DIV/0!	#DIV/0!	#DIV/0!	#DIV/0!	#DIV/0!	#DIV/0!	#DIV/0!	0.0142966	#DIV/0!	#DIV/0!	#DIV/0!	#DIV/0!	#DIV/0!	#DIV/0!	#DIV/0!
650	TH	DORsm	VPLpc	725	Ventral posterolateral nucleus of the thalamus, parvicellular part	0.0275726	0.0657058	0.0271883	0.0445102	0.0722635	0.182339	0.0769168	0.0757086	0.0156222	#DIV/0!	0.062064	0.0867908	#DIV/0!	0.000352916	0.00115033	#DIV/0!	0.0311459	0.00860302	0.00506971	0.00823754	0.0213858	0.0162113	0.00358664	0.0280241	0.0220059	0.0253136	0.0182798	0.03317
651	TH	DORsm	VPM	733	Ventral posteromedial nucleus of the thalamus	0.0328994	0.0544971	0.0388507	0.0520961	0.0773148	#DIV/0!	0.079407	0.101088	#DIV/0!	#DIV/0!	0.103375	0.0859501	#DIV/0!	0.00327545	#DIV/0!	#DIV/0!	0.00575899	0.0230565	0.00742095	#DIV/0!	0.0212783	0.0200761	#DIV/0!	0.030912	0.0249341	0.0464974	#DIV/0!	0.0301019
652	TH	DORsm	VPMpc	741	Ventral posteromedial nucleus of the thalamus, parvicellular part	0.024976	0.0498633	0.0374289	0.0631784	0.0920618	0.0918888	0.0868638	0.0917471	0.110978	0.0968263	0.0964694	0.10582	0.00115546	0.000792809	0.00290752	0.00141393	0.015285	0.0170207	0.0148303	0.019168	0.0263442	0.011893	0.0349199	0.0427604	0.0411599	0.0392273	0.0456485	0.040875
653	TH	DORsm	PoT	563807435	Posterior triangular thalamic nucleus	0.0214271	#DIV/0!	0.0232538	0.0565549	0.0596327	#DIV/0!	0.0678378	0.101921	#DIV/0!	#DIV/0!	0.0803927	0.0784992	#DIV/0!	#DIV/0!	#DIV/0!	#DIV/0!	#DIV/0!	0.0177317	#DIV/0!	#DIV/0!	0.0189749	0.0247658	#DIV/0!	0.0488777	0.0212104	#DIV/0!	#DIV/0!	#DIV/0!
654	TH	DORsm	SPF	406	Subparafascicular nucleus	#DIV/0!	#DIV/0!	#DIV/0!	#DIV/0!	#DIV/0!	#DIV/0!	#DIV/0!	#DIV/0!	#DIV/0!	#DIV/0!	#DIV/0!	#DIV/0!	#DIV/0!	#DIV/0!	#DIV/0!	#DIV/0!	#DIV/0!	#DIV/0!	#DIV/0!	#DIV/0!	#DIV/0!	#DIV/0!	#DIV/0!	#DIV/0!	#DIV/0!	#DIV/0!	#DIV/0!	#DIV/0!
655	TH	DORsm	SPFm	414	Subparafascicular nucleus, magnocellular part	0.010762	0.0404676	0.0195097	0.0670903	#DIV/0!	0.119002	#DIV/0!	#DIV/0!	#DIV/0!	#DIV/0!	#DIV/0!	0.112651	#DIV/0!	0.000575487	#DIV/0!	0.00157027	0.0220454	0.0352428	#DIV/0!	0.0185175	#DIV/0!	#DIV/0!	0.019917	0.0441269	#DIV/0!	0.0667218	0.0489636	#DIV/0!
656	TH	DORsm	SPFp	422	Subparafascicular nucleus, parvicellular part	0.00804374	0.0503763	0.0259819	0.0464174	0.0573157	0.0549653	0.0614146	0.0789799	0.0495086	0.11002	0.0744035	0.0935652	0.00153063	#DIV/0!	0.00149923	0.000431475	0.010075	0.013253	0.0189324	0.0168484	0.0221042	0.0318739	0.014734	0.0342633	0.0297352	0.037422	0.0531978	0.0296206
657	TH	DORsm	SPA	609	Subparafascicular area	0.0270385	#DIV/0!	#DIV/0!	#DIV/0!	#DIV/0!	#DIV/0!	#DIV/0!	#DIV/0!	#DIV/0!	#DIV/0!	#DIV/0!	#DIV/0!	#DIV/0!	#DIV/0!	#DIV/0!	#DIV/0!	#DIV/0!	#DIV/0!	#DIV/0!	#DIV/0!	#DIV/0!	#DIV/0!	0.0163868	#DIV/0!	#DIV/0!	#DIV/0!	#DIV/0!	#DIV/0!
658	TH	DORsm	PP	1044	Peripeduncular nucleus	#DIV/0!	#DIV/0!	#DIV/0!	#DIV/0!	#DIV/0!	#DIV/0!	#DIV/0!	#DIV/0!	#DIV/0!	#DIV/0!	#DIV/0!	#DIV/0!	#DIV/0!	#DIV/0!	#DIV/0!	#DIV/0!	#DIV/0!	#DIV/0!	#DIV/0!	#DIV/0!	#DIV/0!	#DIV/0!	#DIV/0!	#DIV/0!	#DIV/0!	#DIV/0!	#DIV/0!	#DIV/0!
659	TH	DORsm	GENd	1008	Geniculate group, dorsal thalamus	#DIV/0!	#DIV/0!	#DIV/0!	#DIV/0!	#DIV/0!	#DIV/0!	#DIV/0!	#DIV/0!	#DIV/0!	#DIV/0!	#DIV/0!	#DIV/0!	#DIV/0!	#DIV/0!	#DIV/0!	#DIV/0!	#DIV/0!	#DIV/0!	#DIV/0!	#DIV/0!	#DIV/0!	#DIV/0!	#DIV/0!	#DIV/0!	#DIV/0!	#DIV/0!	#DIV/0!	#DIV/0!
660	TH	DORsm	MG	475	Medial geniculate complex	#DIV/0!	#DIV/0!	#DIV/0!	#DIV/0!	#DIV/0!	#DIV/0!	#DIV/0!	#DIV/0!	#DIV/0!	#DIV/0!	#DIV/0!	#DIV/0!	#DIV/0!	#DIV/0!	#DIV/0!	#DIV/0!	#DIV/0!	#DIV/0!	#DIV/0!	#DIV/0!	#DIV/0!	#DIV/0!	#DIV/0!	#DIV/0!	#DIV/0!	#DIV/0!	#DIV/0!	#DIV/0!
661	TH	DORsm	MGd	1072	Medial geniculate complex, dorsal part	#DIV/0!	#DIV/0!	#DIV/0!	#DIV/0!	#DIV/0!	#DIV/0!	#DIV/0!	#DIV/0!	#DIV/0!	#DIV/0!	#DIV/0!	#DIV/0!	#DIV/0!	#DIV/0!	#DIV/0!	#DIV/0!	#DIV/0!	#DIV/0!	#DIV/0!	#DIV/0!	#DIV/0!	#DIV/0!	#DIV/0!	#DIV/0!	#DIV/0!	#DIV/0!	#DIV/0!	#DIV/0!
662	TH	DORsm	MGv	1079	Medial geniculate complex, ventral part	#DIV/0!	#DIV/0!	#DIV/0!	#DIV/0!	#DIV/0!	#DIV/0!	#DIV/0!	#DIV/0!	#DIV/0!	#DIV/0!	#DIV/0!	#DIV/0!	#DIV/0!	#DIV/0!	#DIV/0!	#DIV/0!	#DIV/0!	#DIV/0!	#DIV/0!	#DIV/0!	#DIV/0!	#DIV/0!	#DIV/0!	#DIV/0!	#DIV/0!	#DIV/0!	#DIV/0!	#DIV/0!
663	TH	DORsm	MGm	1088	Medial geniculate complex, medial part	#DIV/0!	#DIV/0!	#DIV/0!	#DIV/0!	#DIV/0!	#DIV/0!	#DIV/0!	#DIV/0!	#DIV/0!	#DIV/0!	#DIV/0!	#DIV/0!	#DIV/0!	#DIV/0!	#DIV/0!	#DIV/0!	#DIV/0!	#DIV/0!	#DIV/0!	#DIV/0!	#DIV/0!	#DIV/0!	#DIV/0!	#DIV/0!	#DIV/0!	#DIV/0!	#DIV/0!	#DIV/0!
664	TH	DORsm	LGd	170	Dorsal part of the lateral geniculate complex	#DIV/0!	#DIV/0!	#DIV/0!	#DIV/0!	#DIV/0!	#DIV/0!	#DIV/0!	#DIV/0!	#DIV/0!	#DIV/0!	#DIV/0!	#DIV/0!	#DIV/0!	#DIV/0!	#DIV/0!	#DIV/0!	#DIV/0!	#DIV/0!	#DIV/0!	#DIV/0!	#DIV/0!	#DIV/0!	#DIV/0!	#DIV/0!	#DIV/0!	#DIV/0!	#DIV/0!	#DIV/0!
665	TH	DORsm	LGd-sh	496345664	Dorsal part of the lateral geniculate complex, shell	#DIV/0!	#DIV/0!	#DIV/0!	#DIV/0!	#DIV/0!	#DIV/0!	#DIV/0!	#DIV/0!	#DIV/0!	#DIV/0!	#DIV/0!	#DIV/0!	#DIV/0!	#DIV/0!	#DIV/0!	#DIV/0!	#DIV/0!	#DIV/0!	#DIV/0!	#DIV/0!	#DIV/0!	#DIV/0!	#DIV/0!	#DIV/0!	#DIV/0!	#DIV/0!	#DIV/0!	#DIV/0!
666	TH	DORsm	LGd-co	496345668	Dorsal part of the lateral geniculate complex, core	#DIV/0!	#DIV/0!	#DIV/0!	#DIV/0!	#DIV/0!	#DIV/0!	#DIV/0!	#DIV/0!	#DIV/0!	#DIV/0!	#DIV/0!	#DIV/0!	#DIV/0!	#DIV/0!	#DIV/0!	#DIV/0!	#DIV/0!	#DIV/0!	#DIV/0!	#DIV/0!	#DIV/0!	#DIV/0!	#DIV/0!	#DIV/0!	#DIV/0!	#DIV/0!	#DIV/0!	#DIV/0!
667	TH	DORsm	LGd-ip	496345672	Dorsal part of the lateral geniculate complex, ipsilateral zone	#DIV/0!	#DIV/0!	#DIV/0!	#DIV/0!	#DIV/0!	#DIV/0!	#DIV/0!	#DIV/0!	#DIV/0!	#DIV/0!	#DIV/0!	#DIV/0!	#DIV/0!	#DIV/0!	#DIV/0!	#DIV/0!	#DIV/0!	#DIV/0!	#DIV/0!	#DIV/0!	#DIV/0!	#DIV/0!	#DIV/0!	#DIV/0!	#DIV/0!	#DIV/0!	#DIV/0!	#DIV/0!
668	TH	DORpm	DORpm	856	Thalamus, polymodal association cortex related	#DIV/0!	#DIV/0!	#DIV/0!	#DIV/0!	#DIV/0!	#DIV/0!	#DIV/0!	#DIV/0!	#DIV/0!	#DIV/0!	#DIV/0!	#DIV/0!	#DIV/0!	#DIV/0!	#DIV/0!	#DIV/0!	#DIV/0!	#DIV/0!	#DIV/0!	#DIV/0!	#DIV/0!	#DIV/0!	#DIV/0!	#DIV/0!	#DIV/0!	#DIV/0!	#DIV/0!	#DIV/0!
669	TH	DORpm	LAT	138	Lateral group of the dorsal thalamus	#DIV/0!	#DIV/0!	#DIV/0!	#DIV/0!	#DIV/0!	#DIV/0!	#DIV/0!	#DIV/0!	#DIV/0!	#DIV/0!	#DIV/0!	#DIV/0!	#DIV/0!	#DIV/0!	#DIV/0!	#DIV/0!	#DIV/0!	#DIV/0!	#DIV/0!	#DIV/0!	#DIV/0!	#DIV/0!	#DIV/0!	#DIV/0!	#DIV/0!	#DIV/0!	#DIV/0!	#DIV/0!
670	TH	DORpm	LP	218	Lateral posterior nucleus of the thalamus	0.0260226	0.0345098	0.0360354	0.04861	0.072276	0.033732	0.0594324	0.0771345	0.0809859	0.0577973	0.0987312	0.100026	0.0005707	0.000329748	0.00050761	0.00101963	0.010506	0.00833226	0.00843981	0.00979468	0.013306	0.00988045	0.0215241	0.0270539	0.0254446	0.0239297	0.0332732	0.0203989
671	TH	DORpm	PO	1020	Posterior complex of the thalamus	0.0270773	0.0316295	0.0317716	0.0502373	0.0811928	0.0906022	0.0741742	0.083254	0.717455	0.104215	0.130896	0.143295	0.00152976	0.000377812	0.000677691	0.00107256	0.00820452	0.0118661	0.00878725	0.00709214	0.0153348	0.0109694	0.014092	0.0350001	0.0251988	0.0277984	0.0335792	0.0260564
672	TH	DORpm	POL	1029	Posterior limiting nucleus of the thalamus	0.0271079	#DIV/0!	0.0121763	0.0724108	0.0934718	#DIV/0!	0.0913966	0.0904805	#DIV/0!	#DIV/0!	0.00694648	0.112979	#DIV/0!	#DIV/0!	#DIV/0!	#DIV/0!	#DIV/0!	0.0139034	0.0109529	#DIV/0!	0.00746149	0.0140695	#DIV/0!	0.0240699	0.0186969	#DIV/0!	#DIV/0!	#DIV/0!
673	TH	DORpm	SGN	325	Suprageniculate nucleus	#DIV/0!	#DIV/0!	#DIV/0!	#DIV/0!	#DIV/0!	#DIV/0!	#DIV/0!	#DIV/0!	#DIV/0!	#DIV/0!	#DIV/0!	#DIV/0!	#DIV/0!	#DIV/0!	#DIV/0!	#DIV/0!	#DIV/0!	#DIV/0!	#DIV/0!	#DIV/0!	#DIV/0!	#DIV/0!	#DIV/0!	#DIV/0!	#DIV/0!	#DIV/0!	#DIV/0!	#DIV/0!
674	TH	DORpm	Eth	560581551	Ethmoid nucleus of the thalamus	0.0403228	0.0540611	0.0472677	0.0643939	0.0784139	0.0870204	0.0908588	0.0795079	#DIV/0!	#DIV/0!	0.101324	0.132808	#DIV/0!	0.000496423	0.00093665	#DIV/0!	0.0162721	0.0106402	0.00639726	0.0118336	0.0108805	0.0171355	0.0439737	0.034843	0.0303371	0.0341564	0.025169	0.0307538
675	TH	DORpm	REth	560581555	Retroethmoid nucleus	#DIV/0!	#DIV/0!	#DIV/0!	#DIV/0!	#DIV/0!	#DIV/0!	#DIV/0!	#DIV/0!	#DIV/0!	#DIV/0!	#DIV/0!	#DIV/0!	#DIV/0!	#DIV/0!	#DIV/0!	#DIV/0!	#DIV/0!	#DIV/0!	#DIV/0!	#DIV/0!	#DIV/0!	#DIV/0!	#DIV/0!	#DIV/0!	#DIV/0!	#DIV/0!	#DIV/0!	#DIV/0!
676	TH	DORpm	ATN	239	Anterior group of the dorsal thalamus	#DIV/0!	#DIV/0!	#DIV/0!	#DIV/0!	#DIV/0!	#DIV/0!	#DIV/0!	#DIV/0!	#DIV/0!	#DIV/0!	#DIV/0!	#DIV/0!	#DIV/0!	#DIV/0!	#DIV/0!	#DIV/0!	#DIV/0!	#DIV/0!	#DIV/0!	#DIV/0!	#DIV/0!	#DIV/0!	#DIV/0!	#DIV/0!	#DIV/0!	#DIV/0!	#DIV/0!	#DIV/0!
677	TH	DORpm	AV	255	Anteroventral nucleus of thalamus	0.0432642	0.0644859	0.0584593	0.0800299	0.10655	0.11366	0.100544	0.111668	0.0856651	0.115863	0.122695	0.14322	0.000815081	0.00107368	0.00143172	0.00388237	0.00968017	0.00813738	0.012332	0.00780924	0.011755	0.0262085	0.0343075	0.0210215	0.0271676	0.0336302	0.0289468	0.0353699
678	TH	DORpm	AM	127	Anteromedial nucleus	#DIV/0!	#DIV/0!	#DIV/0!	#DIV/0!	#DIV/0!	#DIV/0!	#DIV/0!	#DIV/0!	#DIV/0!	#DIV/0!	#DIV/0!	#DIV/0!	#DIV/0!	#DIV/0!	#DIV/0!	#DIV/0!	#DIV/0!	#DIV/0!	#DIV/0!	#DIV/0!	#DIV/0!	#DIV/0!	#DIV/0!	#DIV/0!	#DIV/0!	#DIV/0!	#DIV/0!	#DIV/0!
679	TH	DORpm	AMd	1096	Anteromedial nucleus, dorsal part	0.036494	0.0334554	0.0378008	0.0506858	0.0835057	0.0975939	0.0830041	0.0932549	0.125092	0.131284	0.139254	0.136981	0.000480783	0.000184078	0.00116819	0.00204724	0.00579409	0.0135049	0.0127609	0.0304291	0.0307405	0.0242775	0.0328343	0.0256281	0.0244276	0.033826	0.0488792	0.0431025
680	TH	DORpm	AMv	1104	Anteromedial nucleus, ventral part	0.0496765	0.0558647	0.053884	0.0602861	0.0816454	0.0888279	0.112064	0.113946	0.128514	0.118805	0.111983	0.142849	0.000617071	#DIV/0!	0.00140058	0.00745822	0.0066731	0.0118005	0.00935757	0.00982976	0.0233141	0.018209	0.0262173	0.0257314	0.0314458	0.0286651	0.0328549	0.0286385
681	TH	DORpm	AD	64	Anterodorsal nucleus	0.0133937	0.0656188	0.0550247	0.0950491	0.0915299	0.0737266	0.0731318	0.111179	0.0910584	0.0974977	0.116298	0.14304	0.00362719	4.25279e-05	0.00693141	0.00974126	0.0337692	0.0348242	0.0165884	0.0197429	0.0118951	0.0390634	0.0303842	0.0301704	0.0427509	0.0386762	0.0473686	0.0360245
682	TH	DORpm	IAM	1120	Interanteromedial nucleus of the thalamus	0.0407792	#DIV/0!	#DIV/0!	#DIV/0!	#DIV/0!	#DIV/0!	#DIV/0!	#DIV/0!	#DIV/0!	#DIV/0!	#DIV/0!	#DIV/0!	#DIV/0!	#DIV/0!	#DIV/0!	#DIV/0!	#DIV/0!	#DIV/0!	#DIV/0!	#DIV/0!	#DIV/0!	#DIV/0!	0.0533318	#DIV/0!	#DIV/0!	#DIV/0!	#DIV/0!	#DIV/0!
683	TH	DORpm	IAD	1113	Interanterodorsal nucleus of the thalamus	0.0325574	0.0337893	0.0442178	0.0477772	0.0922092	0.0794784	0.118017	0.0866994	0.118676	0.129711	0.130747	0.139777	0.000225037	0.00077737	0.00111468	0.000404541	0.00948564	0.0168013	0.0158916	0.00646649	#DIV/0!	0.0269392	0.0217164	0.0247124	0.0334984	0.0355374	0.0530236	0.0523747
684	TH	DORpm	LD	155	Lateral dorsal nucleus of thalamus	0.0488771	0.0360216	0.0331698	0.0563063	0.0556323	0.0486441	0.0552814	0.0724834	0.0750944	0.0465859	0.0921789	0.139222	0.00164414	0.00061444	0.00093237	0.000609319	0.00739167	0.0047978	0.00858465	0.00385885	0.0101959	0.0120429	0.00861358	0.0124646	0.0165326	0.0205717	0.0200802	0.0138486
685	TH	DORpm	MED	444	Medial group of the dorsal thalamus	#DIV/0!	#DIV/0!	#DIV/0!	#DIV/0!	#DIV/0!	#DIV/0!	#DIV/0!	#DIV/0!	#DIV/0!	#DIV/0!	#DIV/0!	#DIV/0!	#DIV/0!	#DIV/0!	#DIV/0!	#DIV/0!	#DIV/0!	#DIV/0!	#DIV/0!	#DIV/0!	#DIV/0!	#DIV/0!	#DIV/0!	#DIV/0!	#DIV/0!	#DIV/0!	#DIV/0!	#DIV/0!
686	TH	DORpm	IMD	59	Intermediodorsal nucleus of the thalamus	0.0438337	#DIV/0!	#DIV/0!	#DIV/0!	#DIV/0!	#DIV/0!	#DIV/0!	#DIV/0!	#DIV/0!	#DIV/0!	#DIV/0!	#DIV/0!	#DIV/0!	#DIV/0!	#DIV/0!	#DIV/0!	#DIV/0!	#DIV/0!	#DIV/0!	#DIV/0!	#DIV/0!	#DIV/0!	#DIV/0!	#DIV/0!	#DIV/0!	#DIV/0!	#DIV/0!	#DIV/0!
687	TH	DORpm	MD	362	Mediodorsal nucleus of thalamus	0.0314621	0.0487354	0.0394038	0.0579018	0.0915334	0.087255	0.11116	0.0875391	0.121344	0.126722	0.12134	0.128549	0.00116418	0.00116386	0.00154673	0.000771517	0.0085579	0.0136435	0.0119414	0.00869192	#DIV/0!	0.0151509	0.0188982	0.0311676	0.025536	0.0305437	0.0399414	0.0302754
688	TH	DORpm	MDc	617	Mediodorsal nucleus of the thalamus, central part	#DIV/0!	#DIV/0!	#DIV/0!	#DIV/0!	#DIV/0!	#DIV/0!	#DIV/0!	#DIV/0!	#DIV/0!	#DIV/0!	#DIV/0!	#DIV/0!	#DIV/0!	#DIV/0!	#DIV/0!	#DIV/0!	#DIV/0!	#DIV/0!	#DIV/0!	#DIV/0!	#DIV/0!	#DIV/0!	#DIV/0!	#DIV/0!	#DIV/0!	#DIV/0!	#DIV/0!	#DIV/0!
689	TH	DORpm	MDl	626	Mediodorsal nucleus of the thalamus, lateral part	#DIV/0!	#DIV/0!	#DIV/0!	#DIV/0!	#DIV/0!	#DIV/0!	#DIV/0!	#DIV/0!	#DIV/0!	#DIV/0!	#DIV/0!	#DIV/0!	#DIV/0!	#DIV/0!	#DIV/0!	#DIV/0!	#DIV/0!	#DIV/0!	#DIV/0!	#DIV/0!	#DIV/0!	#DIV/0!	#DIV/0!	#DIV/0!	#DIV/0!	#DIV/0!	#DIV/0!	#DIV/0!
690	TH	DORpm	MDm	636	Mediodorsal nucleus of the thalamus, medial part	#DIV/0!	#DIV/0!	#DIV/0!	#DIV/0!	#DIV/0!	#DIV/0!	#DIV/0!	#DIV/0!	#DIV/0!	#DIV/0!	#DIV/0!	#DIV/0!	#DIV/0!	#DIV/0!	#DIV/0!	#DIV/0!	#DIV/0!	#DIV/0!	#DIV/0!	#DIV/0!	#DIV/0!	#DIV/0!	#DIV/0!	#DIV/0!	#DIV/0!	#DIV/0!	#DIV/0!	#DIV/0!
691	TH	DORpm	SMT	366	Submedial nucleus of the thalamus	0.0458044	0.0547803	0.0363205	0.0536195	0.0666973	0.0968606	0.0983818	0.0681216	0.13153	0.125721	0.117244	0.118843	0.00071822	0.000827739	0.00105965	0.00052071	0.00908438	0.0142281	0.0107589	0.0106071	#DIV/0!	0.00889522	0.0230694	0.0302184	0.0274441	0.050919	0.0302532	0.039845
692	TH	DORpm	PR	1077	Perireunensis nucleus	0.027206	0.0536631	0.04011	0.0705576	0.0679476	0.0910434	0.113082	0.111295	0.102234	0.113316	0.126728	0.116088	0.000397682	0.000199378	1.94547e-05	0.000683019	0.011569	0.0110042	0.0162008	0.0167855	#DIV/0!	0.0245082	0.0385626	0.0447129	0.0491223	0.0581392	0.0490087	0.0644577
693	TH	DORpm	MTN	571	Midline group of the dorsal thalamus	#DIV/0!	#DIV/0!	#DIV/0!	#DIV/0!	#DIV/0!	#DIV/0!	#DIV/0!	#DIV/0!	#DIV/0!	#DIV/0!	#DIV/0!	#DIV/0!	#DIV/0!	#DIV/0!	#DIV/0!	#DIV/0!	#DIV/0!	#DIV/0!	#DIV/0!	#DIV/0!	#DIV/0!	#DIV/0!	#DIV/0!	#DIV/0!	#DIV/0!	#DIV/0!	#DIV/0!	#DIV/0!
694	TH	DORpm	PVT	149	Paraventricular nucleus of the thalamus	0.0170051	0.0755708	#DIV/0!	0.0851235	#DIV/0!	0.0548348	#DIV/0!	#DIV/0!	#DIV/0!	#DIV/0!	#DIV/0!	#DIV/0!	#DIV/0!	#DIV/0!	#DIV/0!	#DIV/0!	#DIV/0!	#DIV/0!	#DIV/0!	#DIV/0!	#DIV/0!	#DIV/0!	0.0065252	0.0976569	#DIV/0!	#DIV/0!	#DIV/0!	#DIV/0!
695	TH	DORpm	PT	15	Parataenial nucleus	0.0329271	0.0354875	0.0226049	0.0400996	#DIV/0!	0.0964887	#DIV/0!	#DIV/0!	#DIV/0!	#DIV/0!	0.154831	0.115146	#DIV/0!	0.000481021	#DIV/0!	0.000916466	0.0116148	0.0213044	#DIV/0!	0.0092804	#DIV/0!	#DIV/0!	#DIV/0!	0.0299365	#DIV/0!	0.0463816	0.0508039	0.0599214
696	TH	DORpm	RE	181	Nucleus of reuniens	0.0420959	0.0386703	0.0378731	0.0614778	#DIV/0!	0.101872	#DIV/0!	#DIV/0!	#DIV/0!	#DIV/0!	0.125942	0.123646	#DIV/0!	#DIV/0!	#DIV/0!	0.000864473	0.0125277	0.0183113	#DIV/0!	0.0122829	#DIV/0!	#DIV/0!	0.048546	0.0498122	#DIV/0!	0.0595974	0.0498394	0.0314368
697	TH	DORpm	Xi	560581559	Xiphoid thalamic nucleus	#DIV/0!	#DIV/0!	#DIV/0!	#DIV/0!	#DIV/0!	#DIV/0!	#DIV/0!	#DIV/0!	#DIV/0!	#DIV/0!	#DIV/0!	#DIV/0!	#DIV/0!	#DIV/0!	#DIV/0!	#DIV/0!	#DIV/0!	#DIV/0!	#DIV/0!	#DIV/0!	#DIV/0!	#DIV/0!	#DIV/0!	#DIV/0!	#DIV/0!	#DIV/0!	#DIV/0!	#DIV/0!
698	TH	DORpm	ILM	51	Intralaminar nuclei of the dorsal thalamus	#DIV/0!	#DIV/0!	#DIV/0!	#DIV/0!	#DIV/0!	#DIV/0!	#DIV/0!	#DIV/0!	#DIV/0!	#DIV/0!	#DIV/0!	#DIV/0!	#DIV/0!	#DIV/0!	#DIV/0!	#DIV/0!	#DIV/0!	#DIV/0!	#DIV/0!	#DIV/0!	#DIV/0!	#DIV/0!	#DIV/0!	#DIV/0!	#DIV/0!	#DIV/0!	#DIV/0!	#DIV/0!
699	TH	DORpm	RH	189	Rhomboid nucleus	0.0509574	#DIV/0!	#DIV/0!	#DIV/0!	#DIV/0!	#DIV/0!	#DIV/0!	#DIV/0!	#DIV/0!	#DIV/0!	#DIV/0!	#DIV/0!	#DIV/0!	#DIV/0!	#DIV/0!	#DIV/0!	#DIV/0!	#DIV/0!	#DIV/0!	#DIV/0!	#DIV/0!	#DIV/0!	0.0306973	#DIV/0!	#DIV/0!	#DIV/0!	#DIV/0!	#DIV/0!
700	TH	DORpm	CM	599	Central medial nucleus of the thalamus	0.04335	0.0682161	#DIV/0!	0.106837	#DIV/0!	0.114051	#DIV/0!	#DIV/0!	#DIV/0!	#DIV/0!	#DIV/0!	#DIV/0!	#DIV/0!	#DIV/0!	#DIV/0!	0.00183593	#DIV/0!	#DIV/0!	#DIV/0!	#DIV/0!	#DIV/0!	#DIV/0!	0.0304345	0.03993	#DIV/0!	#DIV/0!	#DIV/0!	#DIV/0!
701	TH	DORpm	PCN	907	Paracentral nucleus	0.0360072	0.0447593	0.047572	0.069987	0.0913815	0.0890023	0.105576	0.0990542	0.128944	0.13022	0.12501	0.140173	0.00112505	0.00168647	0.00184391	0.00166201	0.00886663	0.016026	0.0114882	0.00918068	0.0169328	0.0155565	0.0164361	0.0364589	0.0267345	0.0345946	0.0475943	0.0313917
702	TH	DORpm	CL	575	Central lateral nucleus of the thalamus	0.010043	0.0393446	0.0326371	0.0438494	0.0725562	0.0851995	0.0767278	0.0836242	0.134229	0.10607	0.101878	0.137979	0.000535013	0.000450304	0.00205066	0.000327309	0.00727635	0.0118435	0.0105873	0.00788618	0.0202366	0.00971852	0.0140338	0.0241972	0.031024	0.0285931	0.0349457	0.0248239
703	TH	DORpm	PF	930	Parafascicular nucleus	0.0289282	0.0556542	0.0559843	0.0926635	0.099201	0.0956136	0.111105	0.112173	0.113017	0.112696	0.101548	0.117512	0.000828988	0.000444217	0.00105159	0.00033192	0.0138696	0.0207412	0.01553	0.0151531	0.0241758	0.0204867	0.0277994	0.0547386	0.038337	0.0497763	0.0517298	0.0404379
704	TH	DORpm	PIL	560581563	Posterior intralaminar thalamic nucleus	#DIV/0!	#DIV/0!	#DIV/0!	#DIV/0!	#DIV/0!	#DIV/0!	#DIV/0!	#DIV/0!	#DIV/0!	#DIV/0!	#DIV/0!	#DIV/0!	#DIV/0!	#DIV/0!	#DIV/0!	#DIV/0!	#DIV/0!	#DIV/0!	#DIV/0!	#DIV/0!	#DIV/0!	#DIV/0!	#DIV/0!	#DIV/0!	#DIV/0!	#DIV/0!	#DIV/0!	#DIV/0!
705	TH	DORpm	RT	262	Reticular nucleus of the thalamus	0.0274145	0.0548453	0.066418	0.0593572	0.0884725	0.0929391	0.0933993	0.0859098	0.122784	0.118012	0.0837268	0.140479	0.000662445	0.00103345	0.000797598	0.00206537	0.00678078	0.0106523	0.0124587	0.00889427	0.0108551	0.0213304	0.0269067	0.047017	0.0288934	0.0399305	0.0302686	0.0605713
706	TH	DORpm	GENv	1014	Geniculate group, ventral thalamus	#DIV/0!	#DIV/0!	#DIV/0!	#DIV/0!	#DIV/0!	#DIV/0!	#DIV/0!	#DIV/0!	#DIV/0!	#DIV/0!	#DIV/0!	#DIV/0!	#DIV/0!	#DIV/0!	#DIV/0!	#DIV/0!	#DIV/0!	#DIV/0!	#DIV/0!	#DIV/0!	#DIV/0!	#DIV/0!	#DIV/0!	#DIV/0!	#DIV/0!	#DIV/0!	#DIV/0!	#DIV/0!
707	TH	DORpm	IGL	27	Intergeniculate leaflet of the lateral geniculate complex	#DIV/0!	#DIV/0!	#DIV/0!	#DIV/0!	#DIV/0!	#DIV/0!	#DIV/0!	#DIV/0!	#DIV/0!	#DIV/0!	#DIV/0!	#DIV/0!	#DIV/0!	#DIV/0!	#DIV/0!	#DIV/0!	#DIV/0!	#DIV/0!	#DIV/0!	#DIV/0!	#DIV/0!	#DIV/0!	#DIV/0!	#DIV/0!	#DIV/0!	#DIV/0!	#DIV/0!	#DIV/0!
708	TH	DORpm	IntG	563807439	Intermediate geniculate nucleus	#DIV/0!	#DIV/0!	#DIV/0!	#DIV/0!	#DIV/0!	#DIV/0!	#DIV/0!	#DIV/0!	#DIV/0!	#DIV/0!	#DIV/0!	#DIV/0!	#DIV/0!	#DIV/0!	#DIV/0!	#DIV/0!	#DIV/0!	#DIV/0!	#DIV/0!	#DIV/0!	#DIV/0!	#DIV/0!	#DIV/0!	#DIV/0!	#DIV/0!	#DIV/0!	#DIV/0!	#DIV/0!
709	TH	DORpm	LGv	178	Ventral part of the lateral geniculate complex	#DIV/0!	#DIV/0!	#DIV/0!	#DIV/0!	#DIV/0!	#DIV/0!	#DIV/0!	#DIV/0!	#DIV/0!	#DIV/0!	#DIV/0!	#DIV/0!	#DIV/0!	#DIV/0!	#DIV/0!	#DIV/0!	#DIV/0!	#DIV/0!	#DIV/0!	#DIV/0!	#DIV/0!	#DIV/0!	#DIV/0!	#DIV/0!	#DIV/0!	#DIV/0!	#DIV/0!	#DIV/0!
710	TH	DORpm	LGvl	300	Ventral part of the lateral geniculate complex, lateral zone	#DIV/0!	#DIV/0!	#DIV/0!	#DIV/0!	#DIV/0!	#DIV/0!	#DIV/0!	#DIV/0!	#DIV/0!	#DIV/0!	#DIV/0!	#DIV/0!	#DIV/0!	#DIV/0!	#DIV/0!	#DIV/0!	#DIV/0!	#DIV/0!	#DIV/0!	#DIV/0!	#DIV/0!	#DIV/0!	#DIV/0!	#DIV/0!	#DIV/0!	#DIV/0!	#DIV/0!	#DIV/0!
711	TH	DORpm	LGvm	316	Ventral part of the lateral geniculate complex, medial zone	#DIV/0!	#DIV/0!	#DIV/0!	#DIV/0!	#DIV/0!	#DIV/0!	#DIV/0!	#DIV/0!	#DIV/0!	#DIV/0!	#DIV/0!	#DIV/0!	#DIV/0!	#DIV/0!	#DIV/0!	#DIV/0!	#DIV/0!	#DIV/0!	#DIV/0!	#DIV/0!	#DIV/0!	#DIV/0!	#DIV/0!	#DIV/0!	#DIV/0!	#DIV/0!	#DIV/0!	#DIV/0!
712	TH	DORpm	SubG	321	Subgeniculate nucleus	#DIV/0!	#DIV/0!	#DIV/0!	#DIV/0!	#DIV/0!	#DIV/0!	#DIV/0!	#DIV/0!	#DIV/0!	#DIV/0!	#DIV/0!	#DIV/0!	#DIV/0!	#DIV/0!	#DIV/0!	#DIV/0!	#DIV/0!	#DIV/0!	#DIV/0!	#DIV/0!	#DIV/0!	#DIV/0!	#DIV/0!	#DIV/0!	#DIV/0!	#DIV/0!	#DIV/0!	#DIV/0!
713	TH	DORpm	EPI	958	Epithalamus	#DIV/0!	#DIV/0!	#DIV/0!	#DIV/0!	#DIV/0!	#DIV/0!	#DIV/0!	#DIV/0!	#DIV/0!	#DIV/0!	#DIV/0!	#DIV/0!	#DIV/0!	#DIV/0!	#DIV/0!	#DIV/0!	#DIV/0!	#DIV/0!	#DIV/0!	#DIV/0!	#DIV/0!	#DIV/0!	#DIV/0!	#DIV/0!	#DIV/0!	#DIV/0!	#DIV/0!	#DIV/0!
714	TH	DORpm	MH	483	Medial habenula	0.0507967	0.00369024	0.00236391	0.0219272	#DIV/0!	0.0481313	#DIV/0!	#DIV/0!	#DIV/0!	#DIV/0!	#DIV/0!	#DIV/0!	#DIV/0!	0.000772847	#DIV/0!	0.000528155	0.00707102	#DIV/0!	#DIV/0!	#DIV/0!	#DIV/0!	#DIV/0!	0.00245352	0.00700696	#DIV/0!	0.00635343	0.0147539	#DIV/0!
715	TH	DORpm	LH	186	Lateral habenula	0.0191883	0.0364377	0.0359486	0.0652768	0.0899667	0.106615	0.0701512	0.0971562	0.152841	0.115623	0.0984516	0.121358	0.000733688	0.000468971	0.00178709	0.000778681	0.0053748	0.00535086	0.00529773	0.00517819	#DIV/0!	0.00783436	0.00800823	0.0254243	0.0158557	0.0224719	0.01995	0.0195272
716	TH	DORpm	PIN	953	Pineal body	#DIV/0!	#DIV/0!	#DIV/0!	#DIV/0!	#DIV/0!	#DIV/0!	#DIV/0!	#DIV/0!	#DIV/0!	#DIV/0!	#DIV/0!	#DIV/0!	#DIV/0!	#DIV/0!	#DIV/0!	#DIV/0!	#DIV/0!	#DIV/0!	#DIV/0!	#DIV/0!	#DIV/0!	#DIV/0!	#DIV/0!	#DIV/0!	#DIV/0!	#DIV/0!	#DIV/0!	#DIV/0!
717	HY	HY	HY	1097	Hypothalamus	0.015609	0.0322464	0.021919	0.0328657	0.0695267	0.0710407	0.0787374	0.0524109	0.102261	0.0887091	0.0873605	0.0755397	0.000463275	0.000265225	0.000485078	0.00030401	0.0135575	0.0209187	0.0217583	0.0208233	0.0274201	0.0258123	0.0346796	0.0377417	0.0431609	0.050797	0.0436896	0.0509216
718	HY	PVZ	PVZ	157	Periventricular zone	#DIV/0!	#DIV/0!	#DIV/0!	#DIV/0!	#DIV/0!	#DIV/0!	#DIV/0!	#DIV/0!	#DIV/0!	#DIV/0!	#DIV/0!	#DIV/0!	#DIV/0!	#DIV/0!	#DIV/0!	#DIV/0!	#DIV/0!	#DIV/0!	#DIV/0!	#DIV/0!	#DIV/0!	#DIV/0!	#DIV/0!	#DIV/0!	#DIV/0!	#DIV/0!	#DIV/0!	#DIV/0!
719	HY	PVZ	SO	390	Supraoptic nucleus	0.00576942	0.0166574	0.0155114	0.0565451	0.0404965	0.023663	0.0673	0.0177703	0.0757862	0.0399639	0.025386	0.0588876	#DIV/0!	#DIV/0!	#DIV/0!	#DIV/0!	0.00506566	0.022364	0.013269	0.0140495	0.0235245	0.00852762	0.00781705	0.0481742	0.0232245	0.0285125	0.0295369	0.0300065
720	HY	PVZ	ASO	332	Accessory supraoptic group	0.00421836	0.0365017	0.0142638	0.0675066	#DIV/0!	0.11652	#DIV/0!	#DIV/0!	#DIV/0!	#DIV/0!	#DIV/0!	#DIV/0!	#DIV/0!	#DIV/0!	#DIV/0!	#DIV/0!	0.0516977	#DIV/0!	#DIV/0!	0.0418124	#DIV/0!	#DIV/0!	#DIV/0!	0.0566029	#DIV/0!	0.0627831	0.0942348	#DIV/0!
721	HY	PVZ	NC	432	Nucleus circularis	#DIV/0!	#DIV/0!	#DIV/0!	#DIV/0!	#DIV/0!	#DIV/0!	#DIV/0!	#DIV/0!	#DIV/0!	#DIV/0!	#DIV/0!	#DIV/0!	#DIV/0!	#DIV/0!	#DIV/0!	#DIV/0!	#DIV/0!	#DIV/0!	#DIV/0!	#DIV/0!	#DIV/0!	#DIV/0!	#DIV/0!	#DIV/0!	#DIV/0!	#DIV/0!	#DIV/0!	#DIV/0!
722	HY	PVZ	PVH	38	Paraventricular hypothalamic nucleus	0.0255915	#DIV/0!	#DIV/0!	0.0637084	#DIV/0!	#DIV/0!	#DIV/0!	#DIV/0!	#DIV/0!	#DIV/0!	#DIV/0!	#DIV/0!	#DIV/0!	#DIV/0!	#DIV/0!	0.000842126	#DIV/0!	#DIV/0!	#DIV/0!	#DIV/0!	#DIV/0!	#DIV/0!	0.0495462	#DIV/0!	#DIV/0!	#DIV/0!	#DIV/0!	#DIV/0!
723	HY	PVZ	PVHm	71	Paraventricular hypothalamic nucleus, magnocellular division	#DIV/0!	#DIV/0!	#DIV/0!	#DIV/0!	#DIV/0!	#DIV/0!	#DIV/0!	#DIV/0!	#DIV/0!	#DIV/0!	#DIV/0!	#DIV/0!	#DIV/0!	#DIV/0!	#DIV/0!	#DIV/0!	#DIV/0!	#DIV/0!	#DIV/0!	#DIV/0!	#DIV/0!	#DIV/0!	#DIV/0!	#DIV/0!	#DIV/0!	#DIV/0!	#DIV/0!	#DIV/0!
724	HY	PVZ	PVHam	47	Paraventricular hypothalamic nucleus, magnocellular division, anterior magnocellular part	#DIV/0!	#DIV/0!	#DIV/0!	#DIV/0!	#DIV/0!	#DIV/0!	#DIV/0!	#DIV/0!	#DIV/0!	#DIV/0!	#DIV/0!	#DIV/0!	#DIV/0!	#DIV/0!	#DIV/0!	#DIV/0!	#DIV/0!	#DIV/0!	#DIV/0!	#DIV/0!	#DIV/0!	#DIV/0!	#DIV/0!	#DIV/0!	#DIV/0!	#DIV/0!	#DIV/0!	#DIV/0!
725	HY	PVZ	PVHmm	79	Paraventricular hypothalamic nucleus, magnocellular division, medial magnocellular part	#DIV/0!	#DIV/0!	#DIV/0!	#DIV/0!	#DIV/0!	#DIV/0!	#DIV/0!	#DIV/0!	#DIV/0!	#DIV/0!	#DIV/0!	#DIV/0!	#DIV/0!	#DIV/0!	#DIV/0!	#DIV/0!	#DIV/0!	#DIV/0!	#DIV/0!	#DIV/0!	#DIV/0!	#DIV/0!	#DIV/0!	#DIV/0!	#DIV/0!	#DIV/0!	#DIV/0!	#DIV/0!
726	HY	PVZ	PVHpm	103	Paraventricular hypothalamic nucleus, magnocellular division, posterior magnocellular part	#DIV/0!	#DIV/0!	#DIV/0!	#DIV/0!	#DIV/0!	#DIV/0!	#DIV/0!	#DIV/0!	#DIV/0!	#DIV/0!	#DIV/0!	#DIV/0!	#DIV/0!	#DIV/0!	#DIV/0!	#DIV/0!	#DIV/0!	#DIV/0!	#DIV/0!	#DIV/0!	#DIV/0!	#DIV/0!	#DIV/0!	#DIV/0!	#DIV/0!	#DIV/0!	#DIV/0!	#DIV/0!
727	HY	PVZ	PVHpml	652	Paraventricular hypothalamic nucleus, magnocellular division, posterior magnocellular part, lateral zone	#DIV/0!	#DIV/0!	#DIV/0!	#DIV/0!	#DIV/0!	#DIV/0!	#DIV/0!	#DIV/0!	#DIV/0!	#DIV/0!	#DIV/0!	#DIV/0!	#DIV/0!	#DIV/0!	#DIV/0!	#DIV/0!	#DIV/0!	#DIV/0!	#DIV/0!	#DIV/0!	#DIV/0!	#DIV/0!	#DIV/0!	#DIV/0!	#DIV/0!	#DIV/0!	#DIV/0!	#DIV/0!
728	HY	PVZ	PVHpmm	660	Paraventricular hypothalamic nucleus, magnocellular division, posterior magnocellular part, medial zone	#DIV/0!	#DIV/0!	#DIV/0!	#DIV/0!	#DIV/0!	#DIV/0!	#DIV/0!	#DIV/0!	#DIV/0!	#DIV/0!	#DIV/0!	#DIV/0!	#DIV/0!	#DIV/0!	#DIV/0!	#DIV/0!	#DIV/0!	#DIV/0!	#DIV/0!	#DIV/0!	#DIV/0!	#DIV/0!	#DIV/0!	#DIV/0!	#DIV/0!	#DIV/0!	#DIV/0!	#DIV/0!
729	HY	PVZ	PVHp	94	Paraventricular hypothalamic nucleus, parvicellular division	#DIV/0!	#DIV/0!	#DIV/0!	#DIV/0!	#DIV/0!	#DIV/0!	#DIV/0!	#DIV/0!	#DIV/0!	#DIV/0!	#DIV/0!	#DIV/0!	#DIV/0!	#DIV/0!	#DIV/0!	#DIV/0!	#DIV/0!	#DIV/0!	#DIV/0!	#DIV/0!	#DIV/0!	#DIV/0!	#DIV/0!	#DIV/0!	#DIV/0!	#DIV/0!	#DIV/0!	#DIV/0!
730	HY	PVZ	PVHap	55	Paraventricular hypothalamic nucleus, parvicellular division, anterior parvicellular part	#DIV/0!	#DIV/0!	#DIV/0!	#DIV/0!	#DIV/0!	#DIV/0!	#DIV/0!	#DIV/0!	#DIV/0!	#DIV/0!	#DIV/0!	#DIV/0!	#DIV/0!	#DIV/0!	#DIV/0!	#DIV/0!	#DIV/0!	#DIV/0!	#DIV/0!	#DIV/0!	#DIV/0!	#DIV/0!	#DIV/0!	#DIV/0!	#DIV/0!	#DIV/0!	#DIV/0!	#DIV/0!
731	HY	PVZ	PVHmpd	87	Paraventricular hypothalamic nucleus, parvicellular division, medial parvicellular part, dorsal zone	#DIV/0!	#DIV/0!	#DIV/0!	#DIV/0!	#DIV/0!	#DIV/0!	#DIV/0!	#DIV/0!	#DIV/0!	#DIV/0!	#DIV/0!	#DIV/0!	#DIV/0!	#DIV/0!	#DIV/0!	#DIV/0!	#DIV/0!	#DIV/0!	#DIV/0!	#DIV/0!	#DIV/0!	#DIV/0!	#DIV/0!	#DIV/0!	#DIV/0!	#DIV/0!	#DIV/0!	#DIV/0!
732	HY	PVZ	PVHpv	110	Paraventricular hypothalamic nucleus, parvicellular division, periventricular part	#DIV/0!	#DIV/0!	#DIV/0!	#DIV/0!	#DIV/0!	#DIV/0!	#DIV/0!	#DIV/0!	#DIV/0!	#DIV/0!	#DIV/0!	#DIV/0!	#DIV/0!	#DIV/0!	#DIV/0!	#DIV/0!	#DIV/0!	#DIV/0!	#DIV/0!	#DIV/0!	#DIV/0!	#DIV/0!	#DIV/0!	#DIV/0!	#DIV/0!	#DIV/0!	#DIV/0!	#DIV/0!
733	HY	PVZ	PVa	30	Periventricular hypothalamic nucleus, anterior part	#DIV/0!	#DIV/0!	#DIV/0!	#DIV/0!	#DIV/0!	#DIV/0!	#DIV/0!	#DIV/0!	#DIV/0!	#DIV/0!	#DIV/0!	#DIV/0!	#DIV/0!	#DIV/0!	#DIV/0!	#DIV/0!	#DIV/0!	#DIV/0!	#DIV/0!	#DIV/0!	#DIV/0!	#DIV/0!	#DIV/0!	#DIV/0!	#DIV/0!	#DIV/0!	#DIV/0!	#DIV/0!
734	HY	PVZ	PVi	118	Periventricular hypothalamic nucleus, intermediate part	#DIV/0!	#DIV/0!	#DIV/0!	#DIV/0!	#DIV/0!	#DIV/0!	#DIV/0!	#DIV/0!	#DIV/0!	#DIV/0!	#DIV/0!	#DIV/0!	#DIV/0!	#DIV/0!	#DIV/0!	#DIV/0!	#DIV/0!	#DIV/0!	#DIV/0!	#DIV/0!	#DIV/0!	#DIV/0!	#DIV/0!	#DIV/0!	#DIV/0!	#DIV/0!	#DIV/0!	#DIV/0!
735	HY	PVZ	ARH	223	Arcuate hypothalamic nucleus	0.0101633	0.014945	#DIV/0!	0.0291034	#DIV/0!	0.0760679	#DIV/0!	#DIV/0!	#DIV/0!	#DIV/0!	#DIV/0!	0.0820278	#DIV/0!	0.00157593	#DIV/0!	0.000274577	0.0120476	0.0467229	#DIV/0!	#DIV/0!	#DIV/0!	#DIV/0!	0.00274392	0.0767255	#DIV/0!	0.0526518	0.0567851	#DIV/0!
736	HY	PVR	PVR	141	Periventricular region	#DIV/0!	#DIV/0!	#DIV/0!	#DIV/0!	#DIV/0!	#DIV/0!	#DIV/0!	#DIV/0!	#DIV/0!	#DIV/0!	#DIV/0!	#DIV/0!	#DIV/0!	#DIV/0!	#DIV/0!	#DIV/0!	#DIV/0!	#DIV/0!	#DIV/0!	#DIV/0!	#DIV/0!	#DIV/0!	#DIV/0!	#DIV/0!	#DIV/0!	#DIV/0!	#DIV/0!	#DIV/0!
737	HY	PVR	ADP	72	Anterodorsal preoptic nucleus	0.0142793	0.0345465	#DIV/0!	0.0285719	#DIV/0!	0.0964246	#DIV/0!	#DIV/0!	#DIV/0!	#DIV/0!	#DIV/0!	#DIV/0!	#DIV/0!	#DIV/0!	#DIV/0!	0.000203021	#DIV/0!	#DIV/0!	#DIV/0!	#DIV/0!	#DIV/0!	#DIV/0!	0.030168	0.0352397	#DIV/0!	#DIV/0!	#DIV/0!	#DIV/0!
738	HY	PVR	AHA	80	Anterior hypothalamic area	#DIV/0!	#DIV/0!	#DIV/0!	#DIV/0!	#DIV/0!	#DIV/0!	#DIV/0!	#DIV/0!	#DIV/0!	#DIV/0!	#DIV/0!	#DIV/0!	#DIV/0!	#DIV/0!	#DIV/0!	#DIV/0!	#DIV/0!	#DIV/0!	#DIV/0!	#DIV/0!	#DIV/0!	#DIV/0!	#DIV/0!	#DIV/0!	#DIV/0!	#DIV/0!	#DIV/0!	#DIV/0!
739	HY	PVR	AVP	263	Anteroventral preoptic nucleus	0.0116228	0.0360056	0.0347571	0.0438418	0.0702586	0.0791502	0.100078	0.0518396	0.111583	0.103239	0.10221	0.0912357	0.000397871	0.000338757	0.00154921	#DIV/0!	0.0130236	0.0196343	0.0275678	0.0249538	#DIV/0!	0.0249931	0.0292	0.0302618	0.062209	0.0948902	0.0578319	0.0745545
740	HY	PVR	AVPV	272	Anteroventral periventricular nucleus	0.0149955	0.0482253	#DIV/0!	0.0361269	#DIV/0!	0.0567299	#DIV/0!	#DIV/0!	#DIV/0!	#DIV/0!	#DIV/0!	#DIV/0!	#DIV/0!	#DIV/0!	#DIV/0!	#DIV/0!	#DIV/0!	#DIV/0!	#DIV/0!	#DIV/0!	#DIV/0!	#DIV/0!	0.0120798	0.0411669	#DIV/0!	#DIV/0!	#DIV/0!	#DIV/0!
741	HY	PVR	DMH	830	Dorsomedial nucleus of the hypothalamus	0.015285	0.0285387	0.0274094	0.0360827	0.0635095	0.0783062	0.122447	0.0533657	0.104221	0.0934121	0.099046	0.0779978	0.000465522	0.0009749	0.000393458	0.000553875	0.0159508	0.0424095	0.0425748	0.018709	#DIV/0!	#DIV/0!	0.0328638	0.0543444	0.0594323	0.0353559	0.0663668	0.101733
742	HY	PVR	DMHa	668	Dorsomedial nucleus of the hypothalamus, anterior part	#DIV/0!	#DIV/0!	#DIV/0!	#DIV/0!	#DIV/0!	#DIV/0!	#DIV/0!	#DIV/0!	#DIV/0!	#DIV/0!	#DIV/0!	#DIV/0!	#DIV/0!	#DIV/0!	#DIV/0!	#DIV/0!	#DIV/0!	#DIV/0!	#DIV/0!	#DIV/0!	#DIV/0!	#DIV/0!	#DIV/0!	#DIV/0!	#DIV/0!	#DIV/0!	#DIV/0!	#DIV/0!
743	HY	PVR	DMHp	676	Dorsomedial nucleus of the hypothalamus, posterior part	#DIV/0!	#DIV/0!	#DIV/0!	#DIV/0!	#DIV/0!	#DIV/0!	#DIV/0!	#DIV/0!	#DIV/0!	#DIV/0!	#DIV/0!	#DIV/0!	#DIV/0!	#DIV/0!	#DIV/0!	#DIV/0!	#DIV/0!	#DIV/0!	#DIV/0!	#DIV/0!	#DIV/0!	#DIV/0!	#DIV/0!	#DIV/0!	#DIV/0!	#DIV/0!	#DIV/0!	#DIV/0!
744	HY	PVR	DMHv	684	Dorsomedial nucleus of the hypothalamus, ventral part	#DIV/0!	#DIV/0!	#DIV/0!	#DIV/0!	#DIV/0!	#DIV/0!	#DIV/0!	#DIV/0!	#DIV/0!	#DIV/0!	#DIV/0!	#DIV/0!	#DIV/0!	#DIV/0!	#DIV/0!	#DIV/0!	#DIV/0!	#DIV/0!	#DIV/0!	#DIV/0!	#DIV/0!	#DIV/0!	#DIV/0!	#DIV/0!	#DIV/0!	#DIV/0!	#DIV/0!	#DIV/0!
745	HY	PVR	MEPO	452	Median preoptic nucleus	#DIV/0!	#DIV/0!	#DIV/0!	#DIV/0!	#DIV/0!	#DIV/0!	#DIV/0!	#DIV/0!	#DIV/0!	#DIV/0!	#DIV/0!	#DIV/0!	#DIV/0!	#DIV/0!	#DIV/0!	#DIV/0!	#DIV/0!	#DIV/0!	#DIV/0!	#DIV/0!	#DIV/0!	#DIV/0!	#DIV/0!	#DIV/0!	#DIV/0!	#DIV/0!	#DIV/0!	#DIV/0!
746	HY	PVR	MPO	523	Medial preoptic area	0.0176185	0.0313261	0.0197426	0.0297399	0.0659034	0.0700228	0.0898012	0.055767	0.105375	0.0935193	0.101831	0.0891728	0.000133032	0.000382026	0.00058458	0.000188542	0.0120316	0.0277483	0.03961	0.0239012	#DIV/0!	0.0351551	0.0315283	0.042409	0.0711126	0.0670119	0.0642483	0.0773692
747	HY	PVR	OV	763	Vascular organ of the lamina terminalis	#DIV/0!	#DIV/0!	#DIV/0!	#DIV/0!	#DIV/0!	#DIV/0!	#DIV/0!	#DIV/0!	#DIV/0!	#DIV/0!	#DIV/0!	#DIV/0!	#DIV/0!	#DIV/0!	#DIV/0!	#DIV/0!	#DIV/0!	#DIV/0!	#DIV/0!	#DIV/0!	#DIV/0!	#DIV/0!	#DIV/0!	#DIV/0!	#DIV/0!	#DIV/0!	#DIV/0!	#DIV/0!
748	HY	PVR	PD	914	Posterodorsal preoptic nucleus	0.0102054	0.01475	0.0199569	0.0186974	0.0440891	0.0528673	#DIV/0!	#DIV/0!	0.0596215	#DIV/0!	0.126776	0.0882708	#DIV/0!	#DIV/0!	#DIV/0!	#DIV/0!	0.0344618	0.0207729	0.025669	0.0295019	#DIV/0!	#DIV/0!	0.0508683	0.01583	0.0829531	0.0649528	0.117183	0.112985
749	HY	PVR	PS	1109	Parastrial nucleus	0.0142631	0.0230166	0.0347204	0.0417648	0.07322	0.0662376	0.0900767	0.0874891	0.0948804	0.0975819	0.0971557	0.103182	0.000804732	#DIV/0!	0.000594871	0.00101136	0.0101958	0.0128194	0.0211659	0.0164069	#DIV/0!	0.0230819	0.0252566	0.0317219	0.0332935	0.0531172	0.0499338	0.0495203
750	HY	PVR	PSCH	1124	Suprachiasmatic preoptic nucleus	#DIV/0!	#DIV/0!	#DIV/0!	#DIV/0!	#DIV/0!	#DIV/0!	#DIV/0!	#DIV/0!	#DIV/0!	#DIV/0!	#DIV/0!	#DIV/0!	#DIV/0!	#DIV/0!	#DIV/0!	#DIV/0!	#DIV/0!	#DIV/0!	#DIV/0!	#DIV/0!	#DIV/0!	#DIV/0!	#DIV/0!	#DIV/0!	#DIV/0!	#DIV/0!	#DIV/0!	#DIV/0!
751	HY	PVR	PVp	126	Periventricular hypothalamic nucleus, posterior part	0.0135733	0.017331	#DIV/0!	0.0294594	#DIV/0!	0.0812126	#DIV/0!	#DIV/0!	#DIV/0!	#DIV/0!	#DIV/0!	0.0715728	#DIV/0!	#DIV/0!	#DIV/0!	#DIV/0!	0.00483071	0.00790396	#DIV/0!	#DIV/0!	#DIV/0!	#DIV/0!	0.0143567	0.0461983	#DIV/0!	0.0973827	0.00275586	#DIV/0!
752	HY	PVR	PVpo	133	Periventricular hypothalamic nucleus, preoptic part	0.00813023	#DIV/0!	#DIV/0!	#DIV/0!	#DIV/0!	#DIV/0!	#DIV/0!	#DIV/0!	#DIV/0!	#DIV/0!	#DIV/0!	#DIV/0!	#DIV/0!	#DIV/0!	#DIV/0!	#DIV/0!	#DIV/0!	#DIV/0!	#DIV/0!	#DIV/0!	#DIV/0!	#DIV/0!	#DIV/0!	#DIV/0!	#DIV/0!	#DIV/0!	#DIV/0!	#DIV/0!
753	HY	PVR	SBPV	347	Subparaventricular zone	0.0122515	#DIV/0!	#DIV/0!	#DIV/0!	#DIV/0!	#DIV/0!	#DIV/0!	#DIV/0!	#DIV/0!	#DIV/0!	#DIV/0!	#DIV/0!	#DIV/0!	#DIV/0!	#DIV/0!	#DIV/0!	#DIV/0!	#DIV/0!	#DIV/0!	#DIV/0!	#DIV/0!	#DIV/0!	0.0323629	#DIV/0!	#DIV/0!	#DIV/0!	#DIV/0!	#DIV/0!
754	HY	PVR	SCH	286	Suprachiasmatic nucleus	0.00739556	#DIV/0!	#DIV/0!	#DIV/0!	#DIV/0!	#DIV/0!	#DIV/0!	#DIV/0!	#DIV/0!	#DIV/0!	#DIV/0!	#DIV/0!	#DIV/0!	#DIV/0!	#DIV/0!	#DIV/0!	#DIV/0!	#DIV/0!	#DIV/0!	#DIV/0!	#DIV/0!	#DIV/0!	0.0372092	#DIV/0!	#DIV/0!	#DIV/0!	#DIV/0!	#DIV/0!
755	HY	PVR	SFO	338	Subfornical organ	0.0157885	#DIV/0!	#DIV/0!	#DIV/0!	#DIV/0!	#DIV/0!	#DIV/0!	#DIV/0!	#DIV/0!	#DIV/0!	#DIV/0!	#DIV/0!	#DIV/0!	#DIV/0!	#DIV/0!	#DIV/0!	#DIV/0!	#DIV/0!	#DIV/0!	#DIV/0!	#DIV/0!	#DIV/0!	#DIV/0!	#DIV/0!	#DIV/0!	#DIV/0!	#DIV/0!	#DIV/0!
756	HY	PVR	VMPO	576073699	Ventromedial preoptic nucleus	0.00522119	0.0261744	#DIV/0!	0.0354302	0.0610736	0.0638407	#DIV/0!	#DIV/0!	0.106266	#DIV/0!	0.110449	0.0612792	0.00061143	#DIV/0!	#DIV/0!	#DIV/0!	0.00615645	0.0346538	0.0755723	0.0242438	#DIV/0!	#DIV/0!	0.0519999	0.0693037	0.0555336	0.0451814	0.0900937	0.000930625
757	HY	PVR	VLPO	689	Ventrolateral preoptic nucleus	0.0115748	0.0217002	0.0159828	0.0275585	0.0534376	0.0498253	0.084745	0.0119509	0.106981	0.0868804	0.07814	0.061704	#DIV/0!	#DIV/0!	#DIV/0!	#DIV/0!	#DIV/0!	0.021476	0.0232306	0.00467918	0.0160484	0.0219198	0.0331178	0.0366718	0.0612649	0.032849	0.0604489	0.0336295
758	HY	MEZ	MEZ	467	Hypothalamic medial zone	#DIV/0!	#DIV/0!	#DIV/0!	#DIV/0!	#DIV/0!	#DIV/0!	#DIV/0!	#DIV/0!	#DIV/0!	#DIV/0!	#DIV/0!	#DIV/0!	#DIV/0!	#DIV/0!	#DIV/0!	#DIV/0!	#DIV/0!	#DIV/0!	#DIV/0!	#DIV/0!	#DIV/0!	#DIV/0!	#DIV/0!	#DIV/0!	#DIV/0!	#DIV/0!	#DIV/0!	#DIV/0!
759	HY	MEZ	AHN	88	Anterior hypothalamic nucleus	0.0128461	0.0339515	0.0195879	0.0316288	0.0738252	0.0946429	0.0972475	0.0553018	0.0915806	0.0915572	0.10643	0.0787912	0.000145611	0.00022979	0.000394686	0.00034124	0.0126441	0.0198525	0.0203044	0.0194462	#DIV/0!	0.0144869	0.0443152	0.0419675	0.0563995	0.0541558	0.0586747	0.06803
760	HY	MEZ	AHNa	700	Anterior hypothalamic nucleus, anterior part	#DIV/0!	#DIV/0!	#DIV/0!	#DIV/0!	#DIV/0!	#DIV/0!	#DIV/0!	#DIV/0!	#DIV/0!	#DIV/0!	#DIV/0!	#DIV/0!	#DIV/0!	#DIV/0!	#DIV/0!	#DIV/0!	#DIV/0!	#DIV/0!	#DIV/0!	#DIV/0!	#DIV/0!	#DIV/0!	#DIV/0!	#DIV/0!	#DIV/0!	#DIV/0!	#DIV/0!	#DIV/0!
761	HY	MEZ	AHNc	708	Anterior hypothalamic nucleus, central part	#DIV/0!	#DIV/0!	#DIV/0!	#DIV/0!	#DIV/0!	#DIV/0!	#DIV/0!	#DIV/0!	#DIV/0!	#DIV/0!	#DIV/0!	#DIV/0!	#DIV/0!	#DIV/0!	#DIV/0!	#DIV/0!	#DIV/0!	#DIV/0!	#DIV/0!	#DIV/0!	#DIV/0!	#DIV/0!	#DIV/0!	#DIV/0!	#DIV/0!	#DIV/0!	#DIV/0!	#DIV/0!
762	HY	MEZ	AHNd	716	Anterior hypothalamic nucleus, dorsal part	#DIV/0!	#DIV/0!	#DIV/0!	#DIV/0!	#DIV/0!	#DIV/0!	#DIV/0!	#DIV/0!	#DIV/0!	#DIV/0!	#DIV/0!	#DIV/0!	#DIV/0!	#DIV/0!	#DIV/0!	#DIV/0!	#DIV/0!	#DIV/0!	#DIV/0!	#DIV/0!	#DIV/0!	#DIV/0!	#DIV/0!	#DIV/0!	#DIV/0!	#DIV/0!	#DIV/0!	#DIV/0!
763	HY	MEZ	AHNp	724	Anterior hypothalamic nucleus, posterior part	#DIV/0!	#DIV/0!	#DIV/0!	#DIV/0!	#DIV/0!	#DIV/0!	#DIV/0!	#DIV/0!	#DIV/0!	#DIV/0!	#DIV/0!	#DIV/0!	#DIV/0!	#DIV/0!	#DIV/0!	#DIV/0!	#DIV/0!	#DIV/0!	#DIV/0!	#DIV/0!	#DIV/0!	#DIV/0!	#DIV/0!	#DIV/0!	#DIV/0!	#DIV/0!	#DIV/0!	#DIV/0!
764	HY	MEZ	MBO	331	Mammillary body	#DIV/0!	#DIV/0!	#DIV/0!	#DIV/0!	#DIV/0!	#DIV/0!	#DIV/0!	#DIV/0!	#DIV/0!	#DIV/0!	#DIV/0!	#DIV/0!	#DIV/0!	#DIV/0!	#DIV/0!	#DIV/0!	#DIV/0!	#DIV/0!	#DIV/0!	#DIV/0!	#DIV/0!	#DIV/0!	#DIV/0!	#DIV/0!	#DIV/0!	#DIV/0!	#DIV/0!	#DIV/0!
765	HY	MEZ	LM	210	Lateral mammillary nucleus	0.00991707	0.0453695	0.0244307	0.0234826	0.0911481	0.062229	0.0436903	0.0488812	0.112816	0.023921	0.0742636	0.101057	0.000324877	0.000285522	0.000862111	#DIV/0!	0.00870102	0.00771333	0.0168301	0.00652153	0.0112332	#DIV/0!	0.0151619	0.00068222	0.00588449	0.0127921	0.0223511	0.0403117
766	HY	MEZ	MM	491	Medial mammillary nucleus	#DIV/0!	#DIV/0!	#DIV/0!	#DIV/0!	#DIV/0!	#DIV/0!	#DIV/0!	#DIV/0!	#DIV/0!	#DIV/0!	#DIV/0!	#DIV/0!	#DIV/0!	#DIV/0!	#DIV/0!	#DIV/0!	#DIV/0!	#DIV/0!	#DIV/0!	#DIV/0!	#DIV/0!	#DIV/0!	#DIV/0!	#DIV/0!	#DIV/0!	#DIV/0!	#DIV/0!	#DIV/0!
767	HY	MEZ	MMme	732	Medial mammillary nucleus, median part	0.0226217	#DIV/0!	#DIV/0!	#DIV/0!	#DIV/0!	#DIV/0!	#DIV/0!	#DIV/0!	#DIV/0!	#DIV/0!	#DIV/0!	#DIV/0!	#DIV/0!	#DIV/0!	#DIV/0!	#DIV/0!	#DIV/0!	#DIV/0!	#DIV/0!	#DIV/0!	#DIV/0!	#DIV/0!	#DIV/0!	#DIV/0!	#DIV/0!	#DIV/0!	#DIV/0!	#DIV/0!
768	HY	MEZ	MMl	606826647	Medial mammillary nucleus, lateral part	0.0108097	0.0644359	0.0171096	0.0357147	0.0900845	0.0757579	0.106748	0.0389294	0.124025	0.101227	0.102816	0.109731	0.000617386	0.000222255	0.00034545	0.0002169	0.00394548	0.0054057	0.002799	0.00906653	#DIV/0!	0.00572662	0.0114202	0.0093943	0.0110846	0.0168557	0.0128657	0.0319142
769	HY	MEZ	MMm	606826651	Medial mammillary nucleus, medial part	0.0118446	0.0474723	#DIV/0!	0.0589674	#DIV/0!	0.0816403	#DIV/0!	#DIV/0!	#DIV/0!	#DIV/0!	0.0846377	0.0787086	#DIV/0!	#DIV/0!	#DIV/0!	0.00023648	0.0108655	0.00195146	#DIV/0!	0.0190652	#DIV/0!	#DIV/0!	0.0260836	0.00591407	#DIV/0!	0.0214466	0.0221019	0.0241247
770	HY	MEZ	MMp	606826655	Medial mammillary nucleus, posterior part	0.00922667	#DIV/0!	#DIV/0!	#DIV/0!	#DIV/0!	#DIV/0!	#DIV/0!	#DIV/0!	#DIV/0!	#DIV/0!	#DIV/0!	#DIV/0!	#DIV/0!	#DIV/0!	#DIV/0!	#DIV/0!	#DIV/0!	#DIV/0!	#DIV/0!	#DIV/0!	#DIV/0!	#DIV/0!	0.0733145	#DIV/0!	#DIV/0!	#DIV/0!	#DIV/0!	#DIV/0!
771	HY	MEZ	MMd	606826659	Medial mammillary nucleus, dorsal part	0.0133438	#DIV/0!	#DIV/0!	#DIV/0!	#DIV/0!	#DIV/0!	#DIV/0!	#DIV/0!	#DIV/0!	#DIV/0!	#DIV/0!	#DIV/0!	#DIV/0!	#DIV/0!	#DIV/0!	0.00235277	#DIV/0!	#DIV/0!	#DIV/0!	#DIV/0!	#DIV/0!	#DIV/0!	0.026913	#DIV/0!	#DIV/0!	#DIV/0!	#DIV/0!	#DIV/0!
772	HY	MEZ	SUM	525	Supramammillary nucleus	0.0155303	0.0312202	0.0260238	0.036662	0.0776146	0.0744957	0.0928962	0.0730179	0.122021	0.0851767	0.0820363	0.110059	0.00461651	0.000117481	0.0152522	0.00043898	0.00911063	0.015911	0.00830451	0.023934	0.0581726	0.0270307	0.0254677	0.011589	0.0283807	0.041852	0.0337571	0.0274392
773	HY	MEZ	SUMl	1110	Supramammillary nucleus, lateral part	#DIV/0!	#DIV/0!	#DIV/0!	#DIV/0!	#DIV/0!	#DIV/0!	#DIV/0!	#DIV/0!	#DIV/0!	#DIV/0!	#DIV/0!	#DIV/0!	#DIV/0!	#DIV/0!	#DIV/0!	#DIV/0!	#DIV/0!	#DIV/0!	#DIV/0!	#DIV/0!	#DIV/0!	#DIV/0!	#DIV/0!	#DIV/0!	#DIV/0!	#DIV/0!	#DIV/0!	#DIV/0!
774	HY	MEZ	SUMm	1118	Supramammillary nucleus, medial part	#DIV/0!	#DIV/0!	#DIV/0!	#DIV/0!	#DIV/0!	#DIV/0!	#DIV/0!	#DIV/0!	#DIV/0!	#DIV/0!	#DIV/0!	#DIV/0!	#DIV/0!	#DIV/0!	#DIV/0!	#DIV/0!	#DIV/0!	#DIV/0!	#DIV/0!	#DIV/0!	#DIV/0!	#DIV/0!	#DIV/0!	#DIV/0!	#DIV/0!	#DIV/0!	#DIV/0!	#DIV/0!
775	HY	MEZ	TM	557	Tuberomammillary nucleus	#DIV/0!	#DIV/0!	#DIV/0!	#DIV/0!	#DIV/0!	#DIV/0!	#DIV/0!	#DIV/0!	#DIV/0!	#DIV/0!	#DIV/0!	#DIV/0!	#DIV/0!	#DIV/0!	#DIV/0!	#DIV/0!	#DIV/0!	#DIV/0!	#DIV/0!	#DIV/0!	#DIV/0!	#DIV/0!	#DIV/0!	#DIV/0!	#DIV/0!	#DIV/0!	#DIV/0!	#DIV/0!
776	HY	MEZ	TMd	1126	Tuberomammillary nucleus, dorsal part	0.0142509	#DIV/0!	#DIV/0!	#DIV/0!	#DIV/0!	#DIV/0!	#DIV/0!	#DIV/0!	#DIV/0!	#DIV/0!	#DIV/0!	#DIV/0!	#DIV/0!	#DIV/0!	#DIV/0!	#DIV/0!	#DIV/0!	#DIV/0!	#DIV/0!	#DIV/0!	#DIV/0!	#DIV/0!	#DIV/0!	#DIV/0!	#DIV/0!	#DIV/0!	#DIV/0!	#DIV/0!
777	HY	MEZ	TMv	1	Tuberomammillary nucleus, ventral part	0.0104571	0.0362484	0.0139943	0.0153213	0.056418	0.0396935	0.0588192	0.0280576	0.0726561	0.0732609	0.0425806	0.0765895	0.00070731	0.000240512	0.000693035	0.000375814	0.0281602	0.0193337	0.0300576	0.0163896	0.0370345	0.0403307	0.0482523	0.0274495	0.0420608	0.044032	0.0375901	0.0751376
778	HY	MEZ	MPN	515	Medial preoptic nucleus	0.0149538	0.0394665	0.00879668	0.0345913	#DIV/0!	0.0948298	#DIV/0!	#DIV/0!	#DIV/0!	#DIV/0!	0.0986195	0.0959735	0.000140635	0.000800038	#DIV/0!	0.000542151	0.0268234	0.0306727	#DIV/0!	0.0324066	#DIV/0!	#DIV/0!	0.0225025	0.0562609	0.0659822	0.0786894	0.0919107	0.0808823
779	HY	MEZ	MPNc	740	Medial preoptic nucleus, central part	#DIV/0!	#DIV/0!	#DIV/0!	#DIV/0!	#DIV/0!	#DIV/0!	#DIV/0!	#DIV/0!	#DIV/0!	#DIV/0!	#DIV/0!	#DIV/0!	#DIV/0!	#DIV/0!	#DIV/0!	#DIV/0!	#DIV/0!	#DIV/0!	#DIV/0!	#DIV/0!	#DIV/0!	#DIV/0!	#DIV/0!	#DIV/0!	#DIV/0!	#DIV/0!	#DIV/0!	#DIV/0!
780	HY	MEZ	MPNl	748	Medial preoptic nucleus, lateral part	#DIV/0!	#DIV/0!	#DIV/0!	#DIV/0!	#DIV/0!	#DIV/0!	#DIV/0!	#DIV/0!	#DIV/0!	#DIV/0!	#DIV/0!	#DIV/0!	#DIV/0!	#DIV/0!	#DIV/0!	#DIV/0!	#DIV/0!	#DIV/0!	#DIV/0!	#DIV/0!	#DIV/0!	#DIV/0!	#DIV/0!	#DIV/0!	#DIV/0!	#DIV/0!	#DIV/0!	#DIV/0!
781	HY	MEZ	MPNm	756	Medial preoptic nucleus, medial part	#DIV/0!	#DIV/0!	#DIV/0!	#DIV/0!	#DIV/0!	#DIV/0!	#DIV/0!	#DIV/0!	#DIV/0!	#DIV/0!	#DIV/0!	#DIV/0!	#DIV/0!	#DIV/0!	#DIV/0!	#DIV/0!	#DIV/0!	#DIV/0!	#DIV/0!	#DIV/0!	#DIV/0!	#DIV/0!	#DIV/0!	#DIV/0!	#DIV/0!	#DIV/0!	#DIV/0!	#DIV/0!
782	HY	MEZ	PMd	980	Dorsal premammillary nucleus	0.0222359	0.046573	0.013289	0.0418989	0.0839182	0.0822766	0.0805529	0.0439058	0.111018	0.109097	0.100384	0.0918382	0.000612722	0.000933562	0.000825586	0.000398913	0.0130773	0.0105725	0.00669003	0.02074	#DIV/0!	0.0273175	0.0347229	0.019296	0.0202929	0.0436358	0.0432643	0.0770318
783	HY	MEZ	PMv	1004	Ventral premammillary nucleus	0.0120761	0.0373766	0.0133903	0.0382769	0.0816205	0.0703109	0.0886299	0.0553687	0.112702	0.100016	0.0819625	0.0709884	0.000486416	0.000978078	0.000639795	0.000625698	0.0223549	0.0248326	0.0256841	0.0134796	0.0268578	0.0431877	0.0357459	0.0487223	0.0362297	0.050438	0.058234	0.0759198
784	HY	MEZ	PVHd	63	Paraventricular hypothalamic nucleus, descending division	0.0399157	0.0433635	0.0419423	0.0425348	0.0736198	0.103876	0.115154	0.072366	0.126059	0.106177	0.108208	0.0824879	0.00166177	0.00160988	0.000602307	0.00210349	0.016531	0.0409812	0.0335598	0.0280276	0.0191565	0.0423878	0.0488999	0.0469494	0.0663794	0.0720737	0.0585355	0.0516374
785	HY	MEZ	PVHdp	439	Paraventricular hypothalamic nucleus, descending division, dorsal parvicellular part	#DIV/0!	#DIV/0!	#DIV/0!	#DIV/0!	#DIV/0!	#DIV/0!	#DIV/0!	#DIV/0!	#DIV/0!	#DIV/0!	#DIV/0!	#DIV/0!	#DIV/0!	#DIV/0!	#DIV/0!	#DIV/0!	#DIV/0!	#DIV/0!	#DIV/0!	#DIV/0!	#DIV/0!	#DIV/0!	#DIV/0!	#DIV/0!	#DIV/0!	#DIV/0!	#DIV/0!	#DIV/0!
786	HY	MEZ	PVHf	447	Paraventricular hypothalamic nucleus, descending division, forniceal part	#DIV/0!	#DIV/0!	#DIV/0!	#DIV/0!	#DIV/0!	#DIV/0!	#DIV/0!	#DIV/0!	#DIV/0!	#DIV/0!	#DIV/0!	#DIV/0!	#DIV/0!	#DIV/0!	#DIV/0!	#DIV/0!	#DIV/0!	#DIV/0!	#DIV/0!	#DIV/0!	#DIV/0!	#DIV/0!	#DIV/0!	#DIV/0!	#DIV/0!	#DIV/0!	#DIV/0!	#DIV/0!
787	HY	MEZ	PVHlp	455	Paraventricular hypothalamic nucleus, descending division, lateral parvicellular part	#DIV/0!	#DIV/0!	#DIV/0!	#DIV/0!	#DIV/0!	#DIV/0!	#DIV/0!	#DIV/0!	#DIV/0!	#DIV/0!	#DIV/0!	#DIV/0!	#DIV/0!	#DIV/0!	#DIV/0!	#DIV/0!	#DIV/0!	#DIV/0!	#DIV/0!	#DIV/0!	#DIV/0!	#DIV/0!	#DIV/0!	#DIV/0!	#DIV/0!	#DIV/0!	#DIV/0!	#DIV/0!
788	HY	MEZ	PVHmpv	464	Paraventricular hypothalamic nucleus, descending division, medial parvicellular part, ventral zone	#DIV/0!	#DIV/0!	#DIV/0!	#DIV/0!	#DIV/0!	#DIV/0!	#DIV/0!	#DIV/0!	#DIV/0!	#DIV/0!	#DIV/0!	#DIV/0!	#DIV/0!	#DIV/0!	#DIV/0!	#DIV/0!	#DIV/0!	#DIV/0!	#DIV/0!	#DIV/0!	#DIV/0!	#DIV/0!	#DIV/0!	#DIV/0!	#DIV/0!	#DIV/0!	#DIV/0!	#DIV/0!
789	HY	MEZ	VMH	693	Ventromedial hypothalamic nucleus	0.0118674	0.0331125	0.0150348	0.0373092	0.0732993	0.0878923	0.0771303	0.0428053	0.102676	0.095582	0.0981718	0.0534573	0.000586633	0.000362199	0.00106562	0.000356186	0.0165479	0.0290425	0.0276275	0.0101012	#DIV/0!	0.030781	0.0339932	0.0419839	0.0578379	0.0459893	0.0644921	0.0680705
790	HY	MEZ	VMHa	761	Ventromedial hypothalamic nucleus, anterior part	#DIV/0!	#DIV/0!	#DIV/0!	#DIV/0!	#DIV/0!	#DIV/0!	#DIV/0!	#DIV/0!	#DIV/0!	#DIV/0!	#DIV/0!	#DIV/0!	#DIV/0!	#DIV/0!	#DIV/0!	#DIV/0!	#DIV/0!	#DIV/0!	#DIV/0!	#DIV/0!	#DIV/0!	#DIV/0!	#DIV/0!	#DIV/0!	#DIV/0!	#DIV/0!	#DIV/0!	#DIV/0!
791	HY	MEZ	VMHc	769	Ventromedial hypothalamic nucleus, central part	#DIV/0!	#DIV/0!	#DIV/0!	#DIV/0!	#DIV/0!	#DIV/0!	#DIV/0!	#DIV/0!	#DIV/0!	#DIV/0!	#DIV/0!	#DIV/0!	#DIV/0!	#DIV/0!	#DIV/0!	#DIV/0!	#DIV/0!	#DIV/0!	#DIV/0!	#DIV/0!	#DIV/0!	#DIV/0!	#DIV/0!	#DIV/0!	#DIV/0!	#DIV/0!	#DIV/0!	#DIV/0!
792	HY	MEZ	VMHdm	777	Ventromedial hypothalamic nucleus, dorsomedial part	#DIV/0!	#DIV/0!	#DIV/0!	#DIV/0!	#DIV/0!	#DIV/0!	#DIV/0!	#DIV/0!	#DIV/0!	#DIV/0!	#DIV/0!	#DIV/0!	#DIV/0!	#DIV/0!	#DIV/0!	#DIV/0!	#DIV/0!	#DIV/0!	#DIV/0!	#DIV/0!	#DIV/0!	#DIV/0!	#DIV/0!	#DIV/0!	#DIV/0!	#DIV/0!	#DIV/0!	#DIV/0!
793	HY	MEZ	VMHvl	785	Ventromedial hypothalamic nucleus, ventrolateral part	#DIV/0!	#DIV/0!	#DIV/0!	#DIV/0!	#DIV/0!	#DIV/0!	#DIV/0!	#DIV/0!	#DIV/0!	#DIV/0!	#DIV/0!	#DIV/0!	#DIV/0!	#DIV/0!	#DIV/0!	#DIV/0!	#DIV/0!	#DIV/0!	#DIV/0!	#DIV/0!	#DIV/0!	#DIV/0!	#DIV/0!	#DIV/0!	#DIV/0!	#DIV/0!	#DIV/0!	#DIV/0!
794	HY	MEZ	PH	946	Posterior hypothalamic nucleus	0.0191391	0.0386669	0.0316	0.0411099	0.0937244	0.0922208	0.102446	0.0678323	0.108865	0.108505	0.104776	0.0920683	0.00143796	0.000167615	0.000745528	0.000224199	0.0264523	0.0240018	0.0295818	0.0307604	#DIV/0!	0.0207074	0.0349709	0.0499019	0.0571725	0.0580635	0.0716655	0.0893351
795	HY	LZ	LZ	290	Hypothalamic lateral zone	#DIV/0!	#DIV/0!	#DIV/0!	#DIV/0!	#DIV/0!	#DIV/0!	#DIV/0!	#DIV/0!	#DIV/0!	#DIV/0!	#DIV/0!	#DIV/0!	#DIV/0!	#DIV/0!	#DIV/0!	#DIV/0!	#DIV/0!	#DIV/0!	#DIV/0!	#DIV/0!	#DIV/0!	#DIV/0!	#DIV/0!	#DIV/0!	#DIV/0!	#DIV/0!	#DIV/0!	#DIV/0!
796	HY	LZ	LHA	194	Lateral hypothalamic area	0.0117074	0.0321887	0.0162029	0.0291099	0.0680049	0.0559843	0.0769552	0.0537438	0.310605	0.0914965	0.0854555	0.0924228	0.00100522	0.000297985	0.000633844	0.000144649	0.0130031	0.0174695	0.0162788	0.0254568	0.0307094	0.0277916	0.0374667	0.0352268	0.0363294	0.0460698	0.0352117	0.0502135
797	HY	LZ	LPO	226	Lateral preoptic area	0.0115649	0.0418469	0.0198151	0.0365617	0.0707984	0.0549743	0.0842931	0.056832	0.366113	0.106907	0.0859222	0.0874578	0.000617135	0.000328317	0.000197422	0.000159102	0.00980576	0.020316	0.0267452	0.0274786	0.0364996	0.027795	0.0265038	0.0285886	0.0428851	0.0487089	0.0382149	0.052639
798	HY	LZ	PST	356	Preparasubthalamic nucleus	#DIV/0!	#DIV/0!	#DIV/0!	#DIV/0!	0.0365122	#DIV/0!	#DIV/0!	#DIV/0!	0.109322	#DIV/0!	#DIV/0!	#DIV/0!	#DIV/0!	#DIV/0!	#DIV/0!	#DIV/0!	#DIV/0!	#DIV/0!	#DIV/0!	#DIV/0!	0.045176	0.021208	#DIV/0!	#DIV/0!	0.0348957	#DIV/0!	#DIV/0!	#DIV/0!
799	HY	LZ	PSTN	364	Parasubthalamic nucleus	0.00872731	0.0273559	0.0181439	0.0230176	0.0628482	0.066051	0.0765648	0.0750534	0.0329964	#DIV/0!	0.103129	0.110717	0.00111075	0.00190199	0.000355718	0.00093946	0.00823679	0.0173915	0.0232142	0.017287	0.0316982	0.0320936	0.0165964	0.033866	0.0283069	0.0270448	0.0279248	0.0285914
800	HY	LZ	PeF	576073704	Perifornical nucleus	0.0183602	0.0192837	0.022346	0.0208256	0.0645992	0.08688	0.0816726	0.0536998	0.105213	0.0942042	0.0955022	0.0682607	0.000111632	0.000234369	0.000852584	0.000335368	0.0145125	0.0234961	0.0161194	0.0154232	0.0473849	0.0307225	0.0439236	0.0397202	0.061763	0.0541918	0.0345656	0.037638
801	HY	LZ	RCH	173	Retrochiasmatic area	0.0053534	0.0213485	0.023477	0.019588	0.0523645	0.0375663	0.0759904	0.00360256	0.0839199	0.0596109	0.0724515	0.0298418	#DIV/0!	#DIV/0!	0.000516829	0.000615414	0.00636912	0.0217666	0.0225047	0.0128861	0.0513109	0.0182162	0.023899	0.0226814	0.0360596	0.0211923	0.0282792	0.0283811
802	HY	LZ	STN	470	Subthalamic nucleus	#DIV/0!	#DIV/0!	#DIV/0!	#DIV/0!	#DIV/0!	#DIV/0!	0.0977841	#DIV/0!	#DIV/0!	#DIV/0!	#DIV/0!	#DIV/0!	#DIV/0!	#DIV/0!	#DIV/0!	#DIV/0!	#DIV/0!	#DIV/0!	#DIV/0!	#DIV/0!	0.0226372	0.0375152	#DIV/0!	#DIV/0!	#DIV/0!	#DIV/0!	#DIV/0!	#DIV/0!
803	HY	LZ	TU	614	Tuberal nucleus	0.00970694	0.024427	0.0151115	0.0264589	0.0551212	0.0464746	0.0612471	0.0171163	0.0966501	0.0799458	0.0752233	0.0369936	0.000715669	0.000415272	0.000619366	0.000610576	0.010353	0.024863	0.0265443	0.0128441	0.0490063	0.0234445	0.0371723	0.0291445	0.0579378	0.0521186	0.0417747	0.0525564
804	HY	LZ	ZI	797	Zona incerta	0.0384245	0.0440095	0.0412678	0.050811	0.08607	0.10031	0.0894245	0.0819985	0.122924	0.106019	0.112203	0.106195	0.000722986	0.000602478	0.00113092	0.000471059	0.0176602	0.0225777	0.0228504	0.0224195	0.0220415	0.031493	0.0390784	0.0499051	0.0446055	0.0598658	0.0542459	0.0549139
805	HY	LZ	A13	796	Dopaminergic A13 group	#DIV/0!	#DIV/0!	#DIV/0!	#DIV/0!	#DIV/0!	#DIV/0!	#DIV/0!	#DIV/0!	#DIV/0!	#DIV/0!	#DIV/0!	#DIV/0!	#DIV/0!	#DIV/0!	#DIV/0!	#DIV/0!	#DIV/0!	#DIV/0!	#DIV/0!	#DIV/0!	#DIV/0!	#DIV/0!	#DIV/0!	#DIV/0!	#DIV/0!	#DIV/0!	#DIV/0!	#DIV/0!
806	HY	LZ	FF	804	Fields of Forel	0.0110923	0.0155723	0.0145229	0.0302026	0.0567823	0.0489294	0.050408	0.0601745	0.105769	#DIV/0!	0.0859435	0.0964172	0.000765285	0.000284523	0.00044324	0.000306646	0.0104149	0.0110178	0.0120498	0.011869	0.0142108	0.0165398	0.0208624	0.0348763	0.02713	0.0364222	0.0358654	0.027726
807	HY	ME	ME	10671	Median eminence	0.00533985	#DIV/0!	#DIV/0!	#DIV/0!	#DIV/0!	#DIV/0!	#DIV/0!	#DIV/0!	#DIV/0!	#DIV/0!	#DIV/0!	#DIV/0!	#DIV/0!	#DIV/0!	#DIV/0!	#DIV/0!	#DIV/0!	#DIV/0!	#DIV/0!	#DIV/0!	#DIV/0!	#DIV/0!	#DIV/0!	#DIV/0!	#DIV/0!	#DIV/0!	#DIV/0!	#DIV/0!
808	MB	MB	MB	313	Midbrain	0.0179384	0.0293487	0.0221147	0.0332994	0.0616607	0.0665606	0.065533	0.0549281	0.0957468	0.0919838	0.0838661	0.093954	0.00077892	0.000874553	0.00116523	0.000568627	0.00918978	0.0125826	0.0108621	0.0137031	0.0136049	0.0156847	0.0229906	0.0258794	0.0264196	0.036495	0.0339108	0.0344005
809	MB	Mbsen	MBsen	339	Midbrain, sensory related	#DIV/0!	#DIV/0!	#DIV/0!	#DIV/0!	#DIV/0!	#DIV/0!	#DIV/0!	#DIV/0!	#DIV/0!	#DIV/0!	#DIV/0!	#DIV/0!	#DIV/0!	#DIV/0!	#DIV/0!	#DIV/0!	#DIV/0!	#DIV/0!	#DIV/0!	#DIV/0!	#DIV/0!	#DIV/0!	#DIV/0!	#DIV/0!	#DIV/0!	#DIV/0!	#DIV/0!	#DIV/0!
810	MB	Mbsen	SCs	302	Superior colliculus, sensory related	#DIV/0!	#DIV/0!	#DIV/0!	#DIV/0!	#DIV/0!	#DIV/0!	#DIV/0!	#DIV/0!	#DIV/0!	#DIV/0!	#DIV/0!	#DIV/0!	#DIV/0!	#DIV/0!	#DIV/0!	#DIV/0!	#DIV/0!	#DIV/0!	#DIV/0!	#DIV/0!	#DIV/0!	#DIV/0!	#DIV/0!	#DIV/0!	#DIV/0!	#DIV/0!	#DIV/0!	#DIV/0!
811	MB	Mbsen	SCop	851	Superior colliculus, optic layer	0.0157892	0.0260103	0.0141669	0.0233669	0.0781231	0.072107	0.0825311	0.0712299	0.104886	0.120788	0.113415	0.120843	0.000145729	0.000197507	0.000229987	9.81772e-05	0.00504255	0.00568613	0.00421218	0.00991967	0.00478634	0.0127588	0.0102531	0.0161528	0.0281508	0.0344275	0.0289168	0.0268476
812	MB	Mbsen	SCsg	842	Superior colliculus, superficial gray layer	0.0113869	0.0173446	0.0109211	0.0184255	0.0700977	0.0586526	0.0670638	0.0534416	0.190892	0.131735	0.129669	0.135989	#DIV/0!	0.000165165	0.000241829	0.00011193	0.00271112	0.00385052	0.00225004	0.00416998	0.00226962	0.00581357	0.00436542	0.0083947	0.0196173	0.0177303	0.0150128	0.012949
813	MB	Mbsen	SCzo	834	Superior colliculus, zonal layer	0.00852111	0.0144127	0.0140516	0.0169103	0.0426383	0.0355927	0.0547038	0.0401222	0.0989085	0.0932363	0.107887	0.0997721	0.000723154	0.00118185	0.000320237	0.000610372	0.0024374	0.00414467	0.00458747	0.0042308	0.00364104	0.00961484	0.00902326	0.0122911	0.0135342	0.0162076	0.0120252	0.0189557
814	MB	Mbsen	IC	4	Inferior colliculus	#DIV/0!	#DIV/0!	#DIV/0!	#DIV/0!	#DIV/0!	#DIV/0!	#DIV/0!	#DIV/0!	#DIV/0!	#DIV/0!	#DIV/0!	#DIV/0!	#DIV/0!	#DIV/0!	#DIV/0!	#DIV/0!	#DIV/0!	#DIV/0!	#DIV/0!	#DIV/0!	#DIV/0!	#DIV/0!	#DIV/0!	#DIV/0!	#DIV/0!	#DIV/0!	#DIV/0!	#DIV/0!
815	MB	Mbsen	ICc	811	Inferior colliculus, central nucleus	0.0297591	0.0262313	0.0239124	0.0542283	0.081017	0.0879781	0.0879434	0.077061	0.21559	0.143119	0.137097	0.122958	0.000385074	0.000103489	0.00247127	0.00100576	0.00733611	0.00921656	0.00345206	0.00700817	0.00847176	0.020904	0.0150444	0.0217546	0.0296552	0.0439265	0.0239115	0.0349497
816	MB	Mbsen	ICd	820	Inferior colliculus, dorsal nucleus	0.0163428	0.0198558	0.0145422	0.0278097	0.0688774	0.0654775	0.0737974	0.0640418	0.116164	0.1274	0.113752	0.0986817	0.000435489	0.000307901	0.000733171	0.000310076	0.00609459	0.00803807	0.0043311	0.00813495	0.00779519	0.0173046	0.0113718	0.0155251	0.0284465	0.0400111	0.0257484	0.0267783
817	MB	Mbsen	ICe	828	Inferior colliculus, external nucleus	0.0264678	0.0166978	0.0129894	0.0310893	0.0584136	0.0545559	0.0520708	0.0690594	0.109652	0.102622	0.0898071	0.0870637	0.000122308	8.70222e-05	0.000902259	0.000248386	0.00477952	0.0100812	0.00412848	0.00805695	0.00647875	0.0178327	0.0150829	0.0175445	0.03195	0.036545	0.030584	0.0288451
818	MB	Mbsen	NB	580	Nucleus of the brachium of the inferior colliculus	#DIV/0!	#DIV/0!	#DIV/0!	#DIV/0!	#DIV/0!	#DIV/0!	#DIV/0!	#DIV/0!	#DIV/0!	#DIV/0!	#DIV/0!	#DIV/0!	#DIV/0!	#DIV/0!	#DIV/0!	#DIV/0!	#DIV/0!	#DIV/0!	#DIV/0!	#DIV/0!	#DIV/0!	#DIV/0!	#DIV/0!	#DIV/0!	#DIV/0!	#DIV/0!	#DIV/0!	#DIV/0!
819	MB	Mbsen	SAG	271	Nucleus sagulum	#DIV/0!	#DIV/0!	#DIV/0!	#DIV/0!	#DIV/0!	#DIV/0!	#DIV/0!	#DIV/0!	#DIV/0!	#DIV/0!	#DIV/0!	#DIV/0!	#DIV/0!	#DIV/0!	#DIV/0!	#DIV/0!	#DIV/0!	#DIV/0!	#DIV/0!	#DIV/0!	#DIV/0!	#DIV/0!	#DIV/0!	#DIV/0!	#DIV/0!	#DIV/0!	#DIV/0!	#DIV/0!
820	MB	Mbsen	PBG	874	Parabigeminal nucleus	#DIV/0!	#DIV/0!	#DIV/0!	#DIV/0!	#DIV/0!	#DIV/0!	#DIV/0!	#DIV/0!	#DIV/0!	#DIV/0!	#DIV/0!	#DIV/0!	#DIV/0!	#DIV/0!	#DIV/0!	#DIV/0!	#DIV/0!	#DIV/0!	#DIV/0!	#DIV/0!	#DIV/0!	#DIV/0!	#DIV/0!	#DIV/0!	#DIV/0!	#DIV/0!	#DIV/0!	#DIV/0!
821	MB	Mbsen	MEV	460	Midbrain trigeminal nucleus	#DIV/0!	0.0210522	0.115255	#DIV/0!	0.0872295	0.0828301	0.0754295	#DIV/0!	0.07393	0.0835927	0.0672992	0.0513982	0.000252859	#DIV/0!	#DIV/0!	0.00541719	0.0107941	0.0381083	0.0241403	0.0175373	0.0196825	#DIV/0!	0.044048	0.0593236	0.0447328	0.0811691	0.0542405	0.0446207
822	MB	Mbsen	SCO	599626923	Subcommissural organ	#DIV/0!	#DIV/0!	#DIV/0!	#DIV/0!	#DIV/0!	#DIV/0!	#DIV/0!	#DIV/0!	#DIV/0!	#DIV/0!	#DIV/0!	#DIV/0!	#DIV/0!	#DIV/0!	#DIV/0!	#DIV/0!	#DIV/0!	#DIV/0!	#DIV/0!	#DIV/0!	#DIV/0!	#DIV/0!	#DIV/0!	#DIV/0!	#DIV/0!	#DIV/0!	#DIV/0!	#DIV/0!
823	MB	Mbmot	MBmot	323	Midbrain, motor related	#DIV/0!	#DIV/0!	#DIV/0!	#DIV/0!	#DIV/0!	#DIV/0!	#DIV/0!	#DIV/0!	#DIV/0!	#DIV/0!	#DIV/0!	#DIV/0!	#DIV/0!	#DIV/0!	#DIV/0!	#DIV/0!	#DIV/0!	#DIV/0!	#DIV/0!	#DIV/0!	#DIV/0!	#DIV/0!	#DIV/0!	#DIV/0!	#DIV/0!	#DIV/0!	#DIV/0!	#DIV/0!
824	MB	Mbmot	SNr	381	Substantia nigra, reticular part	0.00572671	0.0280503	0.0147562	0.0168647	0.0541484	0.031977	0.0669728	0.059434	0.0311542	0.0579777	0.0796673	0.108678	0.00161248	0.00129015	0.000933734	#DIV/0!	0.00629278	0.0104392	0.0112522	0.0128152	0.0136101	0.0141348	0.0187985	0.00719157	0.0113195	0.0230828	0.0166779	0.0208346
825	MB	Mbmot	VTA	749	Ventral tegmental area	0.0120477	0.02088	0.0164884	0.0315714	0.0564974	0.0632811	0.0943148	0.0721398	0.0729839	0.098898	0.0843816	0.107852	0.0004413	0.000507955	0.000484557	0.00114544	0.00759572	0.0109624	0.00946725	0.012118	0.015434	0.0187926	0.0157607	0.0153222	0.0228686	0.0259245	0.0285288	0.0211117
826	MB	Mbmot	PN	607344830	Paranigral nucleus	#DIV/0!	0.039779	#DIV/0!	0.0144517	#DIV/0!	0.101081	#DIV/0!	#DIV/0!	#DIV/0!	#DIV/0!	#DIV/0!	#DIV/0!	#DIV/0!	#DIV/0!	#DIV/0!	#DIV/0!	#DIV/0!	#DIV/0!	#DIV/0!	#DIV/0!	#DIV/0!	#DIV/0!	#DIV/0!	0.00330395	#DIV/0!	#DIV/0!	#DIV/0!	#DIV/0!
827	MB	Mbmot	RR	246	Midbrain reticular nucleus, retrorubral area	0.00886087	0.0195667	0.0176788	0.0282143	0.0602213	0.0505661	0.0582067	0.0524737	0.0469599	0.0888194	0.0690339	0.0532508	0.00050659	7.99944e-06	0.000384582	0.00135783	0.0158393	0.0125671	0.00978083	0.0183712	0.0192833	0.0202529	0.0173337	0.0260212	0.0270361	0.0251248	0.0274411	0.0257362
828	MB	Mbmot	MRN	128	Midbrain reticular nucleus	0.0215632	0.0276329	0.0233851	0.0318797	0.0567593	0.0581794	0.064849	0.0539801	0.0848203	0.0888723	0.0730549	0.0923441	0.00064859	0.000850977	0.000860325	0.000437448	0.00862485	0.0120741	0.0109026	0.0127876	0.0165123	0.0170787	0.0184237	0.0254173	0.0244434	0.0328447	0.0314749	0.0270813
829	MB	Mbmot	MRNm	539	Midbrain reticular nucleus, magnocellular part	#DIV/0!	#DIV/0!	#DIV/0!	#DIV/0!	#DIV/0!	#DIV/0!	#DIV/0!	#DIV/0!	#DIV/0!	#DIV/0!	#DIV/0!	#DIV/0!	#DIV/0!	#DIV/0!	#DIV/0!	#DIV/0!	#DIV/0!	#DIV/0!	#DIV/0!	#DIV/0!	#DIV/0!	#DIV/0!	#DIV/0!	#DIV/0!	#DIV/0!	#DIV/0!	#DIV/0!	#DIV/0!
830	MB	Mbmot	MRNmg	548	Midbrain reticular nucleus, magnocellular part, general	#DIV/0!	#DIV/0!	#DIV/0!	#DIV/0!	#DIV/0!	#DIV/0!	#DIV/0!	#DIV/0!	#DIV/0!	#DIV/0!	#DIV/0!	#DIV/0!	#DIV/0!	#DIV/0!	#DIV/0!	#DIV/0!	#DIV/0!	#DIV/0!	#DIV/0!	#DIV/0!	#DIV/0!	#DIV/0!	#DIV/0!	#DIV/0!	#DIV/0!	#DIV/0!	#DIV/0!	#DIV/0!
831	MB	Mbmot	MRNp	555	Midbrain reticular nucleus, parvicellular part	#DIV/0!	#DIV/0!	#DIV/0!	#DIV/0!	#DIV/0!	#DIV/0!	#DIV/0!	#DIV/0!	#DIV/0!	#DIV/0!	#DIV/0!	#DIV/0!	#DIV/0!	#DIV/0!	#DIV/0!	#DIV/0!	#DIV/0!	#DIV/0!	#DIV/0!	#DIV/0!	#DIV/0!	#DIV/0!	#DIV/0!	#DIV/0!	#DIV/0!	#DIV/0!	#DIV/0!	#DIV/0!
832	MB	Mbmot	SCm	294	Superior colliculus, motor related	#DIV/0!	#DIV/0!	#DIV/0!	#DIV/0!	#DIV/0!	#DIV/0!	#DIV/0!	#DIV/0!	#DIV/0!	#DIV/0!	#DIV/0!	#DIV/0!	#DIV/0!	#DIV/0!	#DIV/0!	#DIV/0!	#DIV/0!	#DIV/0!	#DIV/0!	#DIV/0!	#DIV/0!	#DIV/0!	#DIV/0!	#DIV/0!	#DIV/0!	#DIV/0!	#DIV/0!	#DIV/0!
833	MB	Mbmot	SCdg	26	Superior colliculus, motor related, deep gray layer	0.0145158	0.025699	0.0250433	0.0258597	0.0651751	0.0765688	0.0738201	0.0598211	0.102369	0.109436	0.0960699	0.0949954	0.000632508	0.000209647	0.000558987	0.000316445	0.00783507	0.0102524	0.00969486	0.00960317	0.00955907	0.0153142	0.020515	0.0218946	0.0243581	0.0396421	0.0375148	0.0342022
834	MB	Mbmot	SCdw	42	Superior colliculus, motor related, deep white layer	0.0173422	0.0232808	0.0246529	0.0248863	0.060607	0.0660045	0.0765487	0.046423	0.104188	0.104614	0.0962324	0.0884618	0.000559494	#DIV/0!	0.000503697	0.000394409	0.0103248	0.0140017	0.0107283	0.0103804	0.0109465	0.0184364	0.024689	0.0218564	0.0318993	0.0400908	0.045299	0.0363597
835	MB	Mbmot	SCiw	17	Superior colliculus, motor related, intermediate white layer	0.0164613	0.0290683	0.0239491	0.0276332	0.0701877	0.0755384	0.081873	0.0683468	0.108091	0.115487	0.10246	0.102192	0.00059874	0.000286785	0.000891856	0.000263139	0.00618147	0.00876421	0.00671216	0.00888539	0.0107412	0.0172283	0.0164192	0.0215996	0.0269697	0.0364704	0.0355428	0.0301212
836	MB	Mbmot	SCig	10	Superior colliculus, motor related, intermediate gray layer	0.0177742	0.0337849	0.0249173	0.0285779	0.0791714	0.0780957	0.0906132	0.0725838	0.113259	0.119801	0.110483	0.110466	0.000565902	0.000159899	0.000526307	0.000156422	0.00527197	0.0072102	0.00595704	0.00852481	0.00964508	0.0173104	0.0152446	0.0235344	0.0273739	0.0396611	0.0303531	0.0328987
837	MB	Mbmot	SCig-a	494	Superior colliculus, motor related, intermediate gray layer, sublayer a	#DIV/0!	#DIV/0!	#DIV/0!	#DIV/0!	#DIV/0!	#DIV/0!	#DIV/0!	#DIV/0!	#DIV/0!	#DIV/0!	#DIV/0!	#DIV/0!	#DIV/0!	#DIV/0!	#DIV/0!	#DIV/0!	#DIV/0!	#DIV/0!	#DIV/0!	#DIV/0!	#DIV/0!	#DIV/0!	#DIV/0!	#DIV/0!	#DIV/0!	#DIV/0!	#DIV/0!	#DIV/0!
838	MB	Mbmot	SCig-b	503	Superior colliculus, motor related, intermediate gray layer, sublayer b	#DIV/0!	#DIV/0!	#DIV/0!	#DIV/0!	#DIV/0!	#DIV/0!	#DIV/0!	#DIV/0!	#DIV/0!	#DIV/0!	#DIV/0!	#DIV/0!	#DIV/0!	#DIV/0!	#DIV/0!	#DIV/0!	#DIV/0!	#DIV/0!	#DIV/0!	#DIV/0!	#DIV/0!	#DIV/0!	#DIV/0!	#DIV/0!	#DIV/0!	#DIV/0!	#DIV/0!	#DIV/0!
839	MB	Mbmot	SCig-c	511	Superior colliculus, motor related, intermediate gray layer, sublayer c	#DIV/0!	#DIV/0!	#DIV/0!	#DIV/0!	#DIV/0!	#DIV/0!	#DIV/0!	#DIV/0!	#DIV/0!	#DIV/0!	#DIV/0!	#DIV/0!	#DIV/0!	#DIV/0!	#DIV/0!	#DIV/0!	#DIV/0!	#DIV/0!	#DIV/0!	#DIV/0!	#DIV/0!	#DIV/0!	#DIV/0!	#DIV/0!	#DIV/0!	#DIV/0!	#DIV/0!	#DIV/0!
840	MB	Mbmot	PAG	795	Periaqueductal gray	0.0205464	0.0291986	0.033551	0.0346472	0.0665255	0.073533	0.0805026	0.0402611	0.0990054	0.10484	0.0938751	0.0829762	0.00141503	0.000675197	0.00294713	0.000974226	0.0121714	0.0206082	0.0119055	0.012576	0.0237201	0.0192072	0.0270075	0.0346895	0.0479824	0.0603329	0.0409918	0.044138
841	MB	Mbmot	PRC	50	Precommissural nucleus	0.0211657	0.0320641	0.035663	0.0540494	#DIV/0!	0.0972052	#DIV/0!	#DIV/0!	#DIV/0!	#DIV/0!	0.132219	0.142292	#DIV/0!	#DIV/0!	#DIV/0!	0.000741975	0.0071385	0.0163802	#DIV/0!	0.00976607	#DIV/0!	#DIV/0!	#DIV/0!	0.0473764	#DIV/0!	0.0247022	0.0302957	0.0229897
842	MB	Mbmot	INC	67	Interstitial nucleus of Cajal	0.0185776	0.0635191	0.00330891	0.0321602	#DIV/0!	0.0741224	#DIV/0!	#DIV/0!	#DIV/0!	#DIV/0!	#DIV/0!	#DIV/0!	#DIV/0!	#DIV/0!	#DIV/0!	0.000547484	0.00816731	#DIV/0!	#DIV/0!	0.016982	#DIV/0!	#DIV/0!	#DIV/0!	0.0189347	#DIV/0!	0.0615947	0.02967	#DIV/0!
843	MB	Mbmot	ND	587	Nucleus of Darkschewitsch	0.0156535	#DIV/0!	#DIV/0!	#DIV/0!	#DIV/0!	#DIV/0!	#DIV/0!	#DIV/0!	#DIV/0!	#DIV/0!	#DIV/0!	#DIV/0!	#DIV/0!	#DIV/0!	#DIV/0!	#DIV/0!	#DIV/0!	#DIV/0!	#DIV/0!	#DIV/0!	#DIV/0!	#DIV/0!	#DIV/0!	#DIV/0!	#DIV/0!	#DIV/0!	#DIV/0!	#DIV/0!
844	MB	Mbmot	Su3	614454277	Supraoculomotor periaqueductal gray	0.0334563	0.0429949	0.024186	0.033725	#DIV/0!	0.0982626	#DIV/0!	#DIV/0!	#DIV/0!	#DIV/0!	#DIV/0!	#DIV/0!	#DIV/0!	0.00415821	#DIV/0!	0.00129856	0.0136498	#DIV/0!	#DIV/0!	0.0136862	#DIV/0!	#DIV/0!	#DIV/0!	0.0321816	#DIV/0!	0.0691558	0.0447917	#DIV/0!
845	MB	Mbmot	PRT	1100	Pretectal region	#DIV/0!	#DIV/0!	#DIV/0!	#DIV/0!	#DIV/0!	#DIV/0!	#DIV/0!	#DIV/0!	#DIV/0!	#DIV/0!	#DIV/0!	#DIV/0!	#DIV/0!	#DIV/0!	#DIV/0!	#DIV/0!	#DIV/0!	#DIV/0!	#DIV/0!	#DIV/0!	#DIV/0!	#DIV/0!	#DIV/0!	#DIV/0!	#DIV/0!	#DIV/0!	#DIV/0!	#DIV/0!
846	MB	Mbmot	APN	215	Anterior pretectal nucleus	0.0123073	0.0361706	0.0250883	0.0381158	0.0851869	0.0607852	0.0765034	0.0645388	0.104563	0.0527341	0.0957036	0.106103	0.000667852	0.000555883	0.000567068	8.67005e-05	0.00475665	0.00805745	0.00636983	0.006128	0.0118354	0.0122254	0.0140675	0.0234681	0.0222322	0.0285568	0.0267004	0.0279183
847	MB	Mbmot	MPT	531	Medial pretectal area	0.0318242	0.0303808	0.0225106	0.0206194	#DIV/0!	0.101141	#DIV/0!	#DIV/0!	#DIV/0!	#DIV/0!	0.105176	0.112772	#DIV/0!	#DIV/0!	#DIV/0!	0.000396593	0.00433715	0.00698308	#DIV/0!	0.00254679	#DIV/0!	#DIV/0!	#DIV/0!	0.0185679	#DIV/0!	0.0409061	0.0434906	0.1032
848	MB	Mbmot	NOT	628	Nucleus of the optic tract	0.0167321	0.03621	0.0191791	0.0285621	0.0580554	0.0704503	0.069247	0.0475017	0.0995611	0.0850935	0.0947607	0.0903893	0.000668284	0.00262193	0.000780985	0.000213228	0.00561018	0.00882173	0.00468371	0.00921505	0.00598392	0.0131255	0.0128458	0.0213163	0.0204611	0.0178238	0.029989	0.028436
849	MB	Mbmot	NPC	634	Nucleus of the posterior commissure	0.0200349	0.036241	0.0309131	0.0404078	0.0831347	0.0883299	0.0838503	0.0899042	0.0850103	0.116522	0.107692	0.112468	0.000649288	0.000710783	0.00281359	0.000218693	0.00931305	0.0178661	0.0121945	0.0131555	#DIV/0!	0.00144251	0.0239006	0.0351675	0.0378103	0.0378959	0.0379827	0.0409721
850	MB	Mbmot	OP	706	Olivary pretectal nucleus	0.0147384	0.0446724	0.03042	0.0392806	0.0827111	0.0901436	0.103786	0.0667575	0.128968	0.0942542	0.129631	0.10743	0.00233735	0.00302323	0.00102471	#DIV/0!	0.00594358	0.0105381	0.0115386	0.00952825	0.0168506	0.0117721	0.0130005	0.0265504	0.0282092	0.0325953	0.0432877	0.0315891
851	MB	Mbmot	PPT	1061	Posterior pretectal nucleus	0.0265664	0.0603694	0.0361597	0.0347461	0.0977824	0.0948908	0.0843278	0.0907097	0.114897	0.114557	0.131492	0.118294	0.000160131	#DIV/0!	0.00077383	0.000247496	0.00753199	0.00913157	0.00797987	0.0111281	0.0111922	0.0220311	0.0191939	0.0341565	0.028409	0.044667	0.0389973	0.0458324
852	MB	Mbmot	RPF	549009203	Retroparafascicular nucleus	0.0157067	0.0349126	0.0406854	0.0745836	0.0898072	0.0994738	0.0655331	0.109747	0.106286	0.131139	0.0960503	0.104715	0.000989228	0.00289467	0.00165766	0.000370122	0.0148732	0.0242899	0.0131357	0.010649	#DIV/0!	0.00679662	0.0267873	0.0385116	0.0208701	0.0678969	0.0594133	0.0568378
853	MB	Mbmot	InCo	549009207	Intercollicular nucleus	#DIV/0!	#DIV/0!	#DIV/0!	#DIV/0!	#DIV/0!	#DIV/0!	#DIV/0!	#DIV/0!	#DIV/0!	#DIV/0!	#DIV/0!	#DIV/0!	#DIV/0!	#DIV/0!	#DIV/0!	#DIV/0!	#DIV/0!	#DIV/0!	#DIV/0!	#DIV/0!	#DIV/0!	#DIV/0!	#DIV/0!	#DIV/0!	#DIV/0!	#DIV/0!	#DIV/0!	#DIV/0!
854	MB	Mbmot	CUN	616	Cuneiform nucleus	0.018585	0.024768	0.0322266	0.0304214	0.0604443	0.0951383	0.0735789	0.0809627	#DIV/0!	#DIV/0!	0.0991596	0.078603	0.00049924	0.00227836	0.000747847	#DIV/0!	0.0100998	0.00744348	0.00713476	0.0240681	0.0208145	0.0231299	0.0197785	0.0301765	0.0295739	0.0439958	0.0382156	0.0418195
855	MB	Mbmot	RN	214	Red nucleus	0.0217625	0.0313828	0.0264965	0.0372662	0.0658761	0.0620358	0.0718935	0.070835	0.0735509	0.0940969	0.0728039	0.0903318	0.0013996	0.00181232	0.00160194	0.000974866	0.00993699	0.0153947	0.0114831	0.0125842	0.0163542	0.0179721	0.0156178	0.0256126	0.0221514	0.0290801	0.0360475	0.0217714
856	MB	Mbmot	III	35	Oculomotor nucleus	0.0189192	#DIV/0!	#DIV/0!	#DIV/0!	#DIV/0!	#DIV/0!	#DIV/0!	#DIV/0!	#DIV/0!	#DIV/0!	#DIV/0!	#DIV/0!	#DIV/0!	#DIV/0!	#DIV/0!	#DIV/0!	#DIV/0!	#DIV/0!	#DIV/0!	#DIV/0!	#DIV/0!	#DIV/0!	#DIV/0!	#DIV/0!	#DIV/0!	#DIV/0!	#DIV/0!	#DIV/0!
857	MB	Mbmot	MA3	549009211	Medial accesory oculomotor nucleus	0.0202653	#DIV/0!	#DIV/0!	#DIV/0!	#DIV/0!	#DIV/0!	#DIV/0!	#DIV/0!	#DIV/0!	#DIV/0!	#DIV/0!	#DIV/0!	#DIV/0!	#DIV/0!	#DIV/0!	#DIV/0!	#DIV/0!	#DIV/0!	#DIV/0!	#DIV/0!	#DIV/0!	#DIV/0!	#DIV/0!	#DIV/0!	#DIV/0!	#DIV/0!	#DIV/0!	#DIV/0!
858	MB	Mbmot	EW	975	Edinger-Westphal nucleus	#DIV/0!	#DIV/0!	#DIV/0!	#DIV/0!	#DIV/0!	#DIV/0!	#DIV/0!	#DIV/0!	#DIV/0!	#DIV/0!	#DIV/0!	#DIV/0!	#DIV/0!	#DIV/0!	#DIV/0!	#DIV/0!	#DIV/0!	#DIV/0!	#DIV/0!	#DIV/0!	#DIV/0!	#DIV/0!	#DIV/0!	#DIV/0!	#DIV/0!	#DIV/0!	#DIV/0!	#DIV/0!
859	MB	Mbmot	IV	115	Trochlear nucleus	#DIV/0!	#DIV/0!	#DIV/0!	#DIV/0!	#DIV/0!	#DIV/0!	#DIV/0!	#DIV/0!	#DIV/0!	#DIV/0!	#DIV/0!	#DIV/0!	#DIV/0!	#DIV/0!	#DIV/0!	#DIV/0!	#DIV/0!	#DIV/0!	#DIV/0!	#DIV/0!	#DIV/0!	#DIV/0!	#DIV/0!	#DIV/0!	#DIV/0!	#DIV/0!	#DIV/0!	#DIV/0!
860	MB	Mbmot	Pa4	606826663	Paratrochlear nucleus	#DIV/0!	0.0137994	#DIV/0!	0.0288175	#DIV/0!	0.0630185	#DIV/0!	#DIV/0!	#DIV/0!	#DIV/0!	#DIV/0!	#DIV/0!	#DIV/0!	#DIV/0!	#DIV/0!	#DIV/0!	#DIV/0!	#DIV/0!	#DIV/0!	#DIV/0!	#DIV/0!	#DIV/0!	#DIV/0!	0.000275789	#DIV/0!	#DIV/0!	#DIV/0!	#DIV/0!
861	MB	Mbmot	VTN	757	Ventral tegmental nucleus	#DIV/0!	#DIV/0!	#DIV/0!	0.0320099	#DIV/0!	#DIV/0!	#DIV/0!	#DIV/0!	#DIV/0!	#DIV/0!	#DIV/0!	#DIV/0!	#DIV/0!	#DIV/0!	#DIV/0!	#DIV/0!	#DIV/0!	#DIV/0!	#DIV/0!	#DIV/0!	#DIV/0!	#DIV/0!	#DIV/0!	#DIV/0!	#DIV/0!	#DIV/0!	#DIV/0!	#DIV/0!
862	MB	Mbmot	AT	231	Anterior tegmental nucleus	0.017252	#DIV/0!	#DIV/0!	#DIV/0!	#DIV/0!	#DIV/0!	#DIV/0!	#DIV/0!	#DIV/0!	#DIV/0!	#DIV/0!	#DIV/0!	#DIV/0!	#DIV/0!	#DIV/0!	#DIV/0!	#DIV/0!	#DIV/0!	#DIV/0!	#DIV/0!	#DIV/0!	#DIV/0!	#DIV/0!	#DIV/0!	#DIV/0!	#DIV/0!	#DIV/0!	#DIV/0!
863	MB	Mbmot	LT	66	Lateral terminal nucleus of the accessory optic tract	#DIV/0!	#DIV/0!	#DIV/0!	#DIV/0!	#DIV/0!	#DIV/0!	#DIV/0!	#DIV/0!	#DIV/0!	#DIV/0!	#DIV/0!	#DIV/0!	#DIV/0!	#DIV/0!	#DIV/0!	#DIV/0!	#DIV/0!	#DIV/0!	#DIV/0!	#DIV/0!	#DIV/0!	#DIV/0!	#DIV/0!	#DIV/0!	#DIV/0!	#DIV/0!	#DIV/0!	#DIV/0!
864	MB	Mbmot	DT	75	Dorsal terminal nucleus of the accessory optic tract	#DIV/0!	#DIV/0!	#DIV/0!	#DIV/0!	#DIV/0!	#DIV/0!	#DIV/0!	#DIV/0!	#DIV/0!	#DIV/0!	#DIV/0!	#DIV/0!	#DIV/0!	#DIV/0!	#DIV/0!	#DIV/0!	#DIV/0!	#DIV/0!	#DIV/0!	#DIV/0!	#DIV/0!	#DIV/0!	#DIV/0!	#DIV/0!	#DIV/0!	#DIV/0!	#DIV/0!	#DIV/0!
865	MB	Mbmot	MT	58	Medial terminal nucleus of the accessory optic tract	0.0169061	0.036765	0.0170457	0.0271569	0.061312	0.0261854	0.0774818	0.0696754	0.0395372	0.0223654	0.0656533	0.115045	0.0013379	#DIV/0!	0.000386344	#DIV/0!	0.00944534	0.0103932	0.0112351	0.0106793	0.0133677	0.0161346	0.00459919	0.0215228	0.0195692	0.0200732	0.0248748	0.0334597
866	MB	Mbmot	SNl	615	Substantia nigra, lateral part	#DIV/0!	#DIV/0!	#DIV/0!	#DIV/0!	#DIV/0!	#DIV/0!	#DIV/0!	#DIV/0!	#DIV/0!	#DIV/0!	#DIV/0!	#DIV/0!	#DIV/0!	#DIV/0!	#DIV/0!	#DIV/0!	#DIV/0!	#DIV/0!	#DIV/0!	#DIV/0!	#DIV/0!	#DIV/0!	#DIV/0!	#DIV/0!	#DIV/0!	#DIV/0!	#DIV/0!	#DIV/0!
867	MB	Mbsta	MBsta	348	Midbrain, behavioral state related	#DIV/0!	#DIV/0!	#DIV/0!	#DIV/0!	#DIV/0!	#DIV/0!	#DIV/0!	#DIV/0!	#DIV/0!	#DIV/0!	#DIV/0!	#DIV/0!	#DIV/0!	#DIV/0!	#DIV/0!	#DIV/0!	#DIV/0!	#DIV/0!	#DIV/0!	#DIV/0!	#DIV/0!	#DIV/0!	#DIV/0!	#DIV/0!	#DIV/0!	#DIV/0!	#DIV/0!	#DIV/0!
868	MB	Mbsta	SNc	374	Substantia nigra, compact part	0.0123576	0.0270384	0.0182477	0.0361024	0.067082	0.0727454	0.0795645	0.0830798	0.0266768	#DIV/0!	0.0913581	0.125107	0.00115648	0.00122071	0.00110146	#DIV/0!	0.00502812	0.0152915	0.0129461	0.00608789	0.0143667	0.0166782	0.0247199	0.0246333	0.0107161	0.0264492	0.027808	0.0193287
869	MB	Mbsta	PPN	1052	Pedunculopontine nucleus	0.0141532	0.0227018	0.0205686	0.0296606	0.0566655	0.0586564	0.0624372	0.0447615	0.0739876	0.0811134	0.069783	0.0873147	0.000361874	0.000928306	0.00062474	0.000945993	0.00799486	0.0143046	0.00765634	0.0103287	0.0188157	0.0219909	0.0149515	0.0280256	0.025286	0.0260664	0.0330136	0.0199511
870	MB	Mbsta	RAmb	165	Midbrain raphe nuclei	#DIV/0!	#DIV/0!	#DIV/0!	#DIV/0!	#DIV/0!	#DIV/0!	#DIV/0!	#DIV/0!	#DIV/0!	#DIV/0!	#DIV/0!	#DIV/0!	#DIV/0!	#DIV/0!	#DIV/0!	#DIV/0!	#DIV/0!	#DIV/0!	#DIV/0!	#DIV/0!	#DIV/0!	#DIV/0!	#DIV/0!	#DIV/0!	#DIV/0!	#DIV/0!	#DIV/0!	#DIV/0!
871	MB	Mbsta	IF	12	Interfascicular nucleus raphe	0.0193069	#DIV/0!	#DIV/0!	#DIV/0!	#DIV/0!	#DIV/0!	#DIV/0!	#DIV/0!	#DIV/0!	#DIV/0!	#DIV/0!	#DIV/0!	#DIV/0!	#DIV/0!	#DIV/0!	#DIV/0!	#DIV/0!	#DIV/0!	#DIV/0!	#DIV/0!	#DIV/0!	#DIV/0!	#DIV/0!	#DIV/0!	#DIV/0!	#DIV/0!	#DIV/0!	#DIV/0!
872	MB	Mbsta	IPN	100	Interpeduncular nucleus	0.020115	#DIV/0!	#DIV/0!	0.00966136	#DIV/0!	0.0989122	#DIV/0!	#DIV/0!	#DIV/0!	#DIV/0!	#DIV/0!	#DIV/0!	#DIV/0!	#DIV/0!	#DIV/0!	#DIV/0!	#DIV/0!	#DIV/0!	#DIV/0!	#DIV/0!	#DIV/0!	#DIV/0!	#DIV/0!	#DIV/0!	#DIV/0!	#DIV/0!	#DIV/0!	#DIV/0!
873	MB	Mbsta	IPR	607344834	Interpeduncular nucleus, rostral	0.0110378	#DIV/0!	#DIV/0!	#DIV/0!	#DIV/0!	#DIV/0!	#DIV/0!	#DIV/0!	#DIV/0!	#DIV/0!	#DIV/0!	#DIV/0!	#DIV/0!	#DIV/0!	#DIV/0!	#DIV/0!	#DIV/0!	#DIV/0!	#DIV/0!	#DIV/0!	#DIV/0!	#DIV/0!	#DIV/0!	#DIV/0!	#DIV/0!	#DIV/0!	#DIV/0!	#DIV/0!
874	MB	Mbsta	IPC	607344838	Interpeduncular nucleus, caudal	0.0126536	#DIV/0!	#DIV/0!	#DIV/0!	#DIV/0!	#DIV/0!	#DIV/0!	#DIV/0!	#DIV/0!	#DIV/0!	#DIV/0!	#DIV/0!	#DIV/0!	#DIV/0!	#DIV/0!	#DIV/0!	#DIV/0!	#DIV/0!	#DIV/0!	#DIV/0!	#DIV/0!	#DIV/0!	#DIV/0!	#DIV/0!	#DIV/0!	#DIV/0!	#DIV/0!	#DIV/0!
875	MB	Mbsta	IPA	607344842	Interpeduncular nucleus, apical	0.00873629	#DIV/0!	#DIV/0!	#DIV/0!	#DIV/0!	#DIV/0!	#DIV/0!	#DIV/0!	#DIV/0!	#DIV/0!	#DIV/0!	#DIV/0!	#DIV/0!	#DIV/0!	#DIV/0!	#DIV/0!	#DIV/0!	#DIV/0!	#DIV/0!	#DIV/0!	#DIV/0!	#DIV/0!	#DIV/0!	#DIV/0!	#DIV/0!	#DIV/0!	#DIV/0!	#DIV/0!
876	MB	Mbsta	IPL	607344846	Interpeduncular nucleus, lateral	0.0106135	0.0314706	0.0284105	0.0157124	#DIV/0!	0.0500116	#DIV/0!	#DIV/0!	#DIV/0!	#DIV/0!	#DIV/0!	#DIV/0!	#DIV/0!	#DIV/0!	#DIV/0!	0.000497252	0.00451435	#DIV/0!	#DIV/0!	#DIV/0!	#DIV/0!	#DIV/0!	#DIV/0!	0.0126224	#DIV/0!	0.0358767	0.00985737	#DIV/0!
877	MB	Mbsta	IPI	607344850	Interpeduncular nucleus, intermediate	0.0262992	#DIV/0!	#DIV/0!	#DIV/0!	#DIV/0!	#DIV/0!	#DIV/0!	#DIV/0!	#DIV/0!	#DIV/0!	#DIV/0!	#DIV/0!	#DIV/0!	#DIV/0!	#DIV/0!	#DIV/0!	#DIV/0!	#DIV/0!	#DIV/0!	#DIV/0!	#DIV/0!	#DIV/0!	#DIV/0!	#DIV/0!	#DIV/0!	#DIV/0!	#DIV/0!	#DIV/0!
878	MB	Mbsta	IPDM	607344854	Interpeduncular nucleus, dorsomedial	0.0135015	#DIV/0!	#DIV/0!	#DIV/0!	#DIV/0!	#DIV/0!	#DIV/0!	#DIV/0!	#DIV/0!	#DIV/0!	#DIV/0!	#DIV/0!	#DIV/0!	#DIV/0!	#DIV/0!	#DIV/0!	#DIV/0!	#DIV/0!	#DIV/0!	#DIV/0!	#DIV/0!	#DIV/0!	#DIV/0!	#DIV/0!	#DIV/0!	#DIV/0!	#DIV/0!	#DIV/0!
879	MB	Mbsta	IPDL	607344858	Interpeduncular nucleus, dorsolateral	0.0121103	#DIV/0!	#DIV/0!	#DIV/0!	#DIV/0!	#DIV/0!	#DIV/0!	#DIV/0!	#DIV/0!	#DIV/0!	#DIV/0!	#DIV/0!	#DIV/0!	#DIV/0!	#DIV/0!	#DIV/0!	#DIV/0!	#DIV/0!	#DIV/0!	#DIV/0!	#DIV/0!	#DIV/0!	#DIV/0!	#DIV/0!	#DIV/0!	#DIV/0!	#DIV/0!	#DIV/0!
880	MB	Mbsta	IPRL	607344862	Interpeduncular nucleus, rostrolateral	0.00915109	#DIV/0!	#DIV/0!	#DIV/0!	#DIV/0!	#DIV/0!	#DIV/0!	#DIV/0!	#DIV/0!	#DIV/0!	#DIV/0!	#DIV/0!	#DIV/0!	#DIV/0!	#DIV/0!	0.000174909	#DIV/0!	#DIV/0!	#DIV/0!	#DIV/0!	#DIV/0!	#DIV/0!	#DIV/0!	#DIV/0!	#DIV/0!	#DIV/0!	#DIV/0!	#DIV/0!
881	MB	Mbsta	RL	197	Rostral linear nucleus raphe	#DIV/0!	#DIV/0!	#DIV/0!	#DIV/0!	#DIV/0!	#DIV/0!	#DIV/0!	#DIV/0!	#DIV/0!	#DIV/0!	#DIV/0!	#DIV/0!	#DIV/0!	#DIV/0!	#DIV/0!	#DIV/0!	#DIV/0!	#DIV/0!	#DIV/0!	#DIV/0!	#DIV/0!	#DIV/0!	#DIV/0!	#DIV/0!	#DIV/0!	#DIV/0!	#DIV/0!	#DIV/0!
882	MB	Mbsta	CLI	591	Central linear nucleus raphe	0.0079292	#DIV/0!	#DIV/0!	#DIV/0!	#DIV/0!	#DIV/0!	#DIV/0!	#DIV/0!	#DIV/0!	#DIV/0!	#DIV/0!	#DIV/0!	#DIV/0!	#DIV/0!	#DIV/0!	#DIV/0!	#DIV/0!	#DIV/0!	#DIV/0!	#DIV/0!	#DIV/0!	#DIV/0!	#DIV/0!	#DIV/0!	#DIV/0!	#DIV/0!	#DIV/0!	#DIV/0!
883	MB	Mbsta	DR	872	Dorsal nucleus raphe	0.0469315	#DIV/0!	#DIV/0!	#DIV/0!	#DIV/0!	#DIV/0!	#DIV/0!	#DIV/0!	#DIV/0!	#DIV/0!	#DIV/0!	#DIV/0!	#DIV/0!	#DIV/0!	#DIV/0!	#DIV/0!	#DIV/0!	#DIV/0!	#DIV/0!	#DIV/0!	#DIV/0!	#DIV/0!	#DIV/0!	#DIV/0!	#DIV/0!	#DIV/0!	#DIV/0!	#DIV/0!
884	HB	HB	HB	1065	Hindbrain	#DIV/0!	#DIV/0!	#DIV/0!	#DIV/0!	#DIV/0!	#DIV/0!	#DIV/0!	#DIV/0!	#DIV/0!	#DIV/0!	#DIV/0!	#DIV/0!	#DIV/0!	#DIV/0!	#DIV/0!	#DIV/0!	#DIV/0!	#DIV/0!	#DIV/0!	#DIV/0!	#DIV/0!	#DIV/0!	#DIV/0!	#DIV/0!	#DIV/0!	#DIV/0!	#DIV/0!	#DIV/0!
885	HB	P	P	771	Pons	0.0177759	0.0246583	0.0168672	0.0279782	0.049991	0.0476425	0.0479026	0.0347818	0.0593673	0.0624384	0.0557289	0.0784147	0.000788267	0.000975423	0.000799916	0.000552136	0.0127112	0.0131715	0.0117895	0.0116029	0.0164881	0.0161464	0.0215161	0.0204671	0.0243066	0.0271264	0.0272743	0.0218063
886	HB	P-sen	P-sen	1132	Pons, sensory related	#DIV/0!	#DIV/0!	#DIV/0!	#DIV/0!	#DIV/0!	#DIV/0!	#DIV/0!	#DIV/0!	#DIV/0!	#DIV/0!	#DIV/0!	#DIV/0!	#DIV/0!	#DIV/0!	#DIV/0!	#DIV/0!	#DIV/0!	#DIV/0!	#DIV/0!	#DIV/0!	#DIV/0!	#DIV/0!	#DIV/0!	#DIV/0!	#DIV/0!	#DIV/0!	#DIV/0!	#DIV/0!
887	HB	P-sen	NLL	612	Nucleus of the lateral lemniscus	#DIV/0!	#DIV/0!	#DIV/0!	#DIV/0!	0.0632909	#DIV/0!	0.055655	#DIV/0!	#DIV/0!	#DIV/0!	#DIV/0!	#DIV/0!	#DIV/0!	#DIV/0!	#DIV/0!	#DIV/0!	#DIV/0!	#DIV/0!	#DIV/0!	#DIV/0!	0.0123085	0.0176042	#DIV/0!	#DIV/0!	0.019791	#DIV/0!	#DIV/0!	#DIV/0!
888	HB	P-sen	NLLd	82	Nucleus of the lateral lemniscus, dorsal part	#DIV/0!	#DIV/0!	#DIV/0!	#DIV/0!	#DIV/0!	#DIV/0!	#DIV/0!	#DIV/0!	#DIV/0!	#DIV/0!	#DIV/0!	#DIV/0!	#DIV/0!	#DIV/0!	#DIV/0!	#DIV/0!	#DIV/0!	#DIV/0!	#DIV/0!	#DIV/0!	#DIV/0!	#DIV/0!	#DIV/0!	#DIV/0!	#DIV/0!	#DIV/0!	#DIV/0!	#DIV/0!
889	HB	P-sen	NLLh	90	Nucleus of the lateral lemniscus, horizontal part	#DIV/0!	#DIV/0!	#DIV/0!	#DIV/0!	#DIV/0!	#DIV/0!	#DIV/0!	#DIV/0!	#DIV/0!	#DIV/0!	#DIV/0!	#DIV/0!	#DIV/0!	#DIV/0!	#DIV/0!	#DIV/0!	#DIV/0!	#DIV/0!	#DIV/0!	#DIV/0!	#DIV/0!	#DIV/0!	#DIV/0!	#DIV/0!	#DIV/0!	#DIV/0!	#DIV/0!	#DIV/0!
890	HB	P-sen	NLLv	99	Nucleus of the lateral lemniscus, ventral part	#DIV/0!	#DIV/0!	#DIV/0!	#DIV/0!	#DIV/0!	#DIV/0!	#DIV/0!	#DIV/0!	#DIV/0!	#DIV/0!	#DIV/0!	#DIV/0!	#DIV/0!	#DIV/0!	#DIV/0!	#DIV/0!	#DIV/0!	#DIV/0!	#DIV/0!	#DIV/0!	#DIV/0!	#DIV/0!	#DIV/0!	#DIV/0!	#DIV/0!	#DIV/0!	#DIV/0!	#DIV/0!
891	HB	P-sen	PSV	7	Principal sensory nucleus of the trigeminal	#DIV/0!	#DIV/0!	#DIV/0!	#DIV/0!	#DIV/0!	#DIV/0!	#DIV/0!	#DIV/0!	#DIV/0!	#DIV/0!	#DIV/0!	#DIV/0!	#DIV/0!	#DIV/0!	#DIV/0!	#DIV/0!	#DIV/0!	#DIV/0!	#DIV/0!	#DIV/0!	#DIV/0!	#DIV/0!	#DIV/0!	#DIV/0!	#DIV/0!	#DIV/0!	#DIV/0!	#DIV/0!
892	HB	P-sen	PB	867	Parabrachial nucleus	0.0178344	0.0274431	0.0277123	0.0338678	0.0680959	0.0537739	0.0622115	0.0587006	0.0723597	0.0474896	0.0874012	0.0776732	0.00175026	0.00235261	0.000571568	0.00296259	0.0137726	0.0181026	0.0133327	0.0101818	0.0237539	0.0305581	0.0247155	0.0465286	0.0408926	0.0478745	0.0478049	0.0412593
893	HB	P-sen	KF	123	Koelliker-Fuse subnucleus	#DIV/0!	#DIV/0!	#DIV/0!	#DIV/0!	#DIV/0!	#DIV/0!	#DIV/0!	#DIV/0!	#DIV/0!	#DIV/0!	#DIV/0!	#DIV/0!	#DIV/0!	#DIV/0!	#DIV/0!	#DIV/0!	#DIV/0!	#DIV/0!	#DIV/0!	#DIV/0!	#DIV/0!	#DIV/0!	#DIV/0!	#DIV/0!	#DIV/0!	#DIV/0!	#DIV/0!	#DIV/0!
894	HB	P-sen	PBl	881	Parabrachial nucleus, lateral division	#DIV/0!	#DIV/0!	#DIV/0!	#DIV/0!	#DIV/0!	#DIV/0!	#DIV/0!	#DIV/0!	#DIV/0!	#DIV/0!	#DIV/0!	#DIV/0!	#DIV/0!	#DIV/0!	#DIV/0!	#DIV/0!	#DIV/0!	#DIV/0!	#DIV/0!	#DIV/0!	#DIV/0!	#DIV/0!	#DIV/0!	#DIV/0!	#DIV/0!	#DIV/0!	#DIV/0!	#DIV/0!
895	HB	P-sen	PBlc	860	Parabrachial nucleus, lateral division, central lateral part	#DIV/0!	#DIV/0!	#DIV/0!	#DIV/0!	#DIV/0!	#DIV/0!	#DIV/0!	#DIV/0!	#DIV/0!	#DIV/0!	#DIV/0!	#DIV/0!	#DIV/0!	#DIV/0!	#DIV/0!	#DIV/0!	#DIV/0!	#DIV/0!	#DIV/0!	#DIV/0!	#DIV/0!	#DIV/0!	#DIV/0!	#DIV/0!	#DIV/0!	#DIV/0!	#DIV/0!	#DIV/0!
896	HB	P-sen	PBld	868	Parabrachial nucleus, lateral division, dorsal lateral part	#DIV/0!	#DIV/0!	#DIV/0!	#DIV/0!	#DIV/0!	#DIV/0!	#DIV/0!	#DIV/0!	#DIV/0!	#DIV/0!	#DIV/0!	#DIV/0!	#DIV/0!	#DIV/0!	#DIV/0!	#DIV/0!	#DIV/0!	#DIV/0!	#DIV/0!	#DIV/0!	#DIV/0!	#DIV/0!	#DIV/0!	#DIV/0!	#DIV/0!	#DIV/0!	#DIV/0!	#DIV/0!
897	HB	P-sen	PBle	875	Parabrachial nucleus, lateral division, external lateral part	#DIV/0!	#DIV/0!	#DIV/0!	#DIV/0!	#DIV/0!	#DIV/0!	#DIV/0!	#DIV/0!	#DIV/0!	#DIV/0!	#DIV/0!	#DIV/0!	#DIV/0!	#DIV/0!	#DIV/0!	#DIV/0!	#DIV/0!	#DIV/0!	#DIV/0!	#DIV/0!	#DIV/0!	#DIV/0!	#DIV/0!	#DIV/0!	#DIV/0!	#DIV/0!	#DIV/0!	#DIV/0!
898	HB	P-sen	PBls	883	Parabrachial nucleus, lateral division, superior lateral part	#DIV/0!	#DIV/0!	#DIV/0!	#DIV/0!	#DIV/0!	#DIV/0!	#DIV/0!	#DIV/0!	#DIV/0!	#DIV/0!	#DIV/0!	#DIV/0!	#DIV/0!	#DIV/0!	#DIV/0!	#DIV/0!	#DIV/0!	#DIV/0!	#DIV/0!	#DIV/0!	#DIV/0!	#DIV/0!	#DIV/0!	#DIV/0!	#DIV/0!	#DIV/0!	#DIV/0!	#DIV/0!
899	HB	P-sen	PBlv	891	Parabrachial nucleus, lateral division, ventral lateral part	#DIV/0!	#DIV/0!	#DIV/0!	#DIV/0!	#DIV/0!	#DIV/0!	#DIV/0!	#DIV/0!	#DIV/0!	#DIV/0!	#DIV/0!	#DIV/0!	#DIV/0!	#DIV/0!	#DIV/0!	#DIV/0!	#DIV/0!	#DIV/0!	#DIV/0!	#DIV/0!	#DIV/0!	#DIV/0!	#DIV/0!	#DIV/0!	#DIV/0!	#DIV/0!	#DIV/0!	#DIV/0!
900	HB	P-sen	PBm	890	Parabrachial nucleus, medial division	#DIV/0!	#DIV/0!	#DIV/0!	#DIV/0!	#DIV/0!	#DIV/0!	#DIV/0!	#DIV/0!	#DIV/0!	#DIV/0!	#DIV/0!	#DIV/0!	#DIV/0!	#DIV/0!	#DIV/0!	#DIV/0!	#DIV/0!	#DIV/0!	#DIV/0!	#DIV/0!	#DIV/0!	#DIV/0!	#DIV/0!	#DIV/0!	#DIV/0!	#DIV/0!	#DIV/0!	#DIV/0!
901	HB	P-sen	PBme	899	Parabrachial nucleus, medial division, external medial part	#DIV/0!	#DIV/0!	#DIV/0!	#DIV/0!	#DIV/0!	#DIV/0!	#DIV/0!	#DIV/0!	#DIV/0!	#DIV/0!	#DIV/0!	#DIV/0!	#DIV/0!	#DIV/0!	#DIV/0!	#DIV/0!	#DIV/0!	#DIV/0!	#DIV/0!	#DIV/0!	#DIV/0!	#DIV/0!	#DIV/0!	#DIV/0!	#DIV/0!	#DIV/0!	#DIV/0!	#DIV/0!
902	HB	P-sen	PBmm	915	Parabrachial nucleus, medial division, medial medial part	#DIV/0!	#DIV/0!	#DIV/0!	#DIV/0!	#DIV/0!	#DIV/0!	#DIV/0!	#DIV/0!	#DIV/0!	#DIV/0!	#DIV/0!	#DIV/0!	#DIV/0!	#DIV/0!	#DIV/0!	#DIV/0!	#DIV/0!	#DIV/0!	#DIV/0!	#DIV/0!	#DIV/0!	#DIV/0!	#DIV/0!	#DIV/0!	#DIV/0!	#DIV/0!	#DIV/0!	#DIV/0!
903	HB	P-sen	PBmv	923	Parabrachial nucleus, medial division, ventral medial part	#DIV/0!	#DIV/0!	#DIV/0!	#DIV/0!	#DIV/0!	#DIV/0!	#DIV/0!	#DIV/0!	#DIV/0!	#DIV/0!	#DIV/0!	#DIV/0!	#DIV/0!	#DIV/0!	#DIV/0!	#DIV/0!	#DIV/0!	#DIV/0!	#DIV/0!	#DIV/0!	#DIV/0!	#DIV/0!	#DIV/0!	#DIV/0!	#DIV/0!	#DIV/0!	#DIV/0!	#DIV/0!
904	HB	P-sen	SOC	398	Superior olivary complex	#DIV/0!	#DIV/0!	#DIV/0!	#DIV/0!	#DIV/0!	#DIV/0!	#DIV/0!	#DIV/0!	#DIV/0!	#DIV/0!	#DIV/0!	#DIV/0!	#DIV/0!	#DIV/0!	#DIV/0!	#DIV/0!	#DIV/0!	#DIV/0!	#DIV/0!	#DIV/0!	#DIV/0!	#DIV/0!	#DIV/0!	#DIV/0!	#DIV/0!	#DIV/0!	#DIV/0!	#DIV/0!
905	HB	P-sen	POR	122	Superior olivary complex, periolivary region	0.0176746	0.02836	0.0137537	0.0504855	0.066587	0.0346995	0.0477102	0.049172	0.0215451	0.055679	0.0652283	0.0962839	0.00150195	0.000686316	0.000745756	0.000345765	0.0114116	0.0141725	0.00542944	0.00152819	0.0106338	0.0236289	0.00838348	0.0248348	0.0156206	0.00208851	0.0370018	0.0166351
906	HB	P-sen	SOCm	105	Superior olivary complex, medial part	0.0183994	0.0538981	0.0144802	0.0490164	0.0604767	0.0387115	0.0722696	0.0569983	0.0920975	0.0514409	0.0890377	0.0811461	0.00128115	0.00109107	0.000572475	0.0001979	0.0183244	0.0145979	0.0199874	0.0119344	0.0191454	0.0249708	0.0356008	0.0220439	0.0278192	0.0243316	0.0374543	0.0215226
907	HB	P-sen	SOCl	114	Superior olivary complex, lateral part	0.0270348	#DIV/0!	#DIV/0!	#DIV/0!	0.0618037	#DIV/0!	0.0383859	#DIV/0!	#DIV/0!	#DIV/0!	0.0500721	0.0666556	#DIV/0!	#DIV/0!	#DIV/0!	#DIV/0!	#DIV/0!	0.0100956	#DIV/0!	#DIV/0!	0.0218617	0.0248554	#DIV/0!	0.0187006	0.0155643	#DIV/0!	#DIV/0!	#DIV/0!
908	HB	P-mot	P-mot	987	Pons, motor related	#DIV/0!	#DIV/0!	#DIV/0!	#DIV/0!	#DIV/0!	#DIV/0!	#DIV/0!	#DIV/0!	#DIV/0!	#DIV/0!	#DIV/0!	#DIV/0!	#DIV/0!	#DIV/0!	#DIV/0!	#DIV/0!	#DIV/0!	#DIV/0!	#DIV/0!	#DIV/0!	#DIV/0!	#DIV/0!	#DIV/0!	#DIV/0!	#DIV/0!	#DIV/0!	#DIV/0!	#DIV/0!
909	HB	P-mot	B	280	Barrington's nucleus	#DIV/0!	0.0271075	#DIV/0!	0.0363444	0.0766633	0.0791426	#DIV/0!	#DIV/0!	0.0961376	0.0794228	0.0927835	0.0764029	#DIV/0!	#DIV/0!	0.00117888	0.000850245	#DIV/0!	0.0295928	#DIV/0!	#DIV/0!	#DIV/0!	0.0227423	0.0475458	0.052275	#DIV/0!	0.0217157	#DIV/0!	0.0123132
910	HB	P-mot	DTN	880	Dorsal tegmental nucleus	0.0316018	#DIV/0!	#DIV/0!	0.0285653	#DIV/0!	#DIV/0!	#DIV/0!	#DIV/0!	#DIV/0!	#DIV/0!	#DIV/0!	#DIV/0!	#DIV/0!	#DIV/0!	#DIV/0!	0.00152208	#DIV/0!	#DIV/0!	#DIV/0!	#DIV/0!	#DIV/0!	#DIV/0!	#DIV/0!	#DIV/0!	#DIV/0!	#DIV/0!	#DIV/0!	#DIV/0!
911	HB	P-mot	LTN	283	Lateral tegmental nucleus	#DIV/0!	#DIV/0!	#DIV/0!	#DIV/0!	#DIV/0!	#DIV/0!	#DIV/0!	#DIV/0!	#DIV/0!	#DIV/0!	#DIV/0!	#DIV/0!	#DIV/0!	#DIV/0!	#DIV/0!	#DIV/0!	#DIV/0!	#DIV/0!	#DIV/0!	#DIV/0!	#DIV/0!	#DIV/0!	#DIV/0!	#DIV/0!	#DIV/0!	#DIV/0!	#DIV/0!	#DIV/0!
912	HB	P-mot	PDTg	599626927	Posterodorsal tegmental nucleus	0.0152744	#DIV/0!	#DIV/0!	0.0415088	#DIV/0!	#DIV/0!	#DIV/0!	#DIV/0!	#DIV/0!	#DIV/0!	#DIV/0!	#DIV/0!	#DIV/0!	#DIV/0!	#DIV/0!	#DIV/0!	#DIV/0!	#DIV/0!	#DIV/0!	#DIV/0!	#DIV/0!	#DIV/0!	#DIV/0!	#DIV/0!	#DIV/0!	#DIV/0!	#DIV/0!	#DIV/0!
913	HB	P-mot	PCG	898	Pontine central gray	0.0192775	0.0234319	0.0229483	0.0383844	0.0650438	0.0636892	0.0732542	0.0747002	0.0748463	0.088291	0.0737427	0.0791762	0.00066286	0.000739474	0.000385803	0.000652878	0.00766654	0.0137014	0.00608772	0.00812291	#DIV/0!	0.0242229	0.0124128	0.0339242	0.022142	0.0287343	0.0188389	0.0207175
914	HB	P-mot	PG	931	Pontine gray	0.0522953	0.0815945	0.0404094	0.0733936	0.0874506	0.0880393	0.0902257	0.0682829	0.112066	0.0975763	0.0980019	0.121026	0.00217704	0.00222085	0.00121921	0.00278815	0.0251011	0.0299381	0.0321916	0.0490924	0.0430323	0.0435929	0.0575658	0.0513059	0.0393091	0.05116	0.05847	0.0602083
915	HB	P-mot	PRNc	1093	Pontine reticular nucleus, caudal part	0.0138527	0.023004	0.016127	0.0226015	0.0487882	0.0435364	0.0499486	0.0410201	0.0707527	0.0684922	0.0661157	0.0671796	0.000829666	0.000965123	0.000473293	0.00059603	0.0096409	0.010365	0.00957662	0.0185201	0.0152797	0.0184061	0.0149006	0.0210991	0.0209458	0.0240947	0.0236318	0.024332
916	HB	P-mot	PRNv	552	Pontine reticular nucleus, ventral part	#DIV/0!	#DIV/0!	#DIV/0!	#DIV/0!	#DIV/0!	#DIV/0!	#DIV/0!	#DIV/0!	#DIV/0!	#DIV/0!	#DIV/0!	#DIV/0!	#DIV/0!	#DIV/0!	#DIV/0!	#DIV/0!	#DIV/0!	#DIV/0!	#DIV/0!	#DIV/0!	#DIV/0!	#DIV/0!	#DIV/0!	#DIV/0!	#DIV/0!	#DIV/0!	#DIV/0!	#DIV/0!
917	HB	P-mot	SG	318	Supragenual nucleus	0.0149632	#DIV/0!	#DIV/0!	#DIV/0!	#DIV/0!	#DIV/0!	#DIV/0!	#DIV/0!	#DIV/0!	#DIV/0!	#DIV/0!	#DIV/0!	#DIV/0!	#DIV/0!	#DIV/0!	#DIV/0!	#DIV/0!	#DIV/0!	#DIV/0!	#DIV/0!	#DIV/0!	#DIV/0!	#DIV/0!	#DIV/0!	#DIV/0!	#DIV/0!	#DIV/0!	#DIV/0!
918	HB	P-mot	SSN	462	Superior salivatory nucleus	#DIV/0!	#DIV/0!	#DIV/0!	#DIV/0!	#DIV/0!	#DIV/0!	#DIV/0!	#DIV/0!	#DIV/0!	#DIV/0!	#DIV/0!	#DIV/0!	#DIV/0!	#DIV/0!	#DIV/0!	#DIV/0!	#DIV/0!	#DIV/0!	#DIV/0!	#DIV/0!	#DIV/0!	#DIV/0!	#DIV/0!	#DIV/0!	#DIV/0!	#DIV/0!	#DIV/0!	#DIV/0!
919	HB	P-mot	SUT	534	Supratrigeminal nucleus	0.0189581	#DIV/0!	0.00812469	0.0174797	0.0463342	#DIV/0!	0.0524797	0.0528323	#DIV/0!	#DIV/0!	0.0670928	0.06387	#DIV/0!	#DIV/0!	#DIV/0!	#DIV/0!	#DIV/0!	0.00633054	#DIV/0!	#DIV/0!	0.0191566	0.0248338	#DIV/0!	0.0173177	0.0267993	#DIV/0!	#DIV/0!	#DIV/0!
920	HB	P-mot	TRN	574	Tegmental reticular nucleus	0.0437617	0.0546765	0.0297257	0.0389087	0.066154	0.0676727	0.0670391	0.0514637	0.0698641	0.0720977	0.087201	0.0834165	0.00317357	0.00360736	0.00354335	0.00142181	0.0192771	0.0196464	0.0193428	0.0348976	0.0183675	0.0321506	0.0362741	0.0307308	0.0299332	0.0326772	0.0346436	0.0362441
921	HB	P-mot	V	621	Motor nucleus of trigeminal	#DIV/0!	#DIV/0!	#DIV/0!	#DIV/0!	#DIV/0!	#DIV/0!	0.0458284	#DIV/0!	0.0302906	#DIV/0!	#DIV/0!	#DIV/0!	#DIV/0!	#DIV/0!	#DIV/0!	#DIV/0!	#DIV/0!	#DIV/0!	#DIV/0!	#DIV/0!	0.012616	0.00858447	#DIV/0!	#DIV/0!	#DIV/0!	#DIV/0!	#DIV/0!	#DIV/0!
922	HB	P-mot	P5	549009215	Peritrigeminal zone	0.0103562	#DIV/0!	0.00844096	0.0135912	0.0440733	#DIV/0!	0.0388583	0.0423981	#DIV/0!	#DIV/0!	0.0453799	0.0522256	#DIV/0!	#DIV/0!	0.000240491	#DIV/0!	#DIV/0!	0.00479836	0.00501472	#DIV/0!	0.0126034	0.0137866	#DIV/0!	0.0116699	0.0123117	#DIV/0!	#DIV/0!	#DIV/0!
923	HB	P-mot	Acs5	549009219	Accessory trigeminal nucleus	0.00592972	#DIV/0!	0.012849	0.010547	0.0496228	#DIV/0!	0.0460198	0.0126722	#DIV/0!	#DIV/0!	0.0432886	0.021677	#DIV/0!	#DIV/0!	#DIV/0!	#DIV/0!	#DIV/0!	0.00311169	#DIV/0!	#DIV/0!	0.00535818	0.0132521	#DIV/0!	0.00659197	0.00967561	#DIV/0!	#DIV/0!	#DIV/0!
924	HB	P-mot	PC5	549009223	Parvicellular motor 5 nucleus	#DIV/0!	#DIV/0!	#DIV/0!	#DIV/0!	#DIV/0!	#DIV/0!	#DIV/0!	#DIV/0!	#DIV/0!	#DIV/0!	#DIV/0!	#DIV/0!	#DIV/0!	#DIV/0!	#DIV/0!	#DIV/0!	#DIV/0!	#DIV/0!	#DIV/0!	#DIV/0!	0.0127595	#DIV/0!	#DIV/0!	#DIV/0!	#DIV/0!	#DIV/0!	#DIV/0!	#DIV/0!
925	HB	P-mot	I5	549009227	Intertrigeminal nucleus	#DIV/0!	#DIV/0!	#DIV/0!	#DIV/0!	#DIV/0!	#DIV/0!	#DIV/0!	#DIV/0!	#DIV/0!	#DIV/0!	#DIV/0!	#DIV/0!	#DIV/0!	#DIV/0!	#DIV/0!	#DIV/0!	#DIV/0!	#DIV/0!	#DIV/0!	#DIV/0!	#DIV/0!	#DIV/0!	#DIV/0!	#DIV/0!	#DIV/0!	#DIV/0!	#DIV/0!	#DIV/0!
926	HB	P-sat	P-sat	1117	Pons, behavioral state related	#DIV/0!	#DIV/0!	#DIV/0!	#DIV/0!	#DIV/0!	#DIV/0!	#DIV/0!	#DIV/0!	#DIV/0!	#DIV/0!	#DIV/0!	#DIV/0!	#DIV/0!	#DIV/0!	#DIV/0!	#DIV/0!	#DIV/0!	#DIV/0!	#DIV/0!	#DIV/0!	#DIV/0!	#DIV/0!	#DIV/0!	#DIV/0!	#DIV/0!	#DIV/0!	#DIV/0!	#DIV/0!
927	HB	P-sat	CS	679	Superior central nucleus raphe	0.0122724	#DIV/0!	#DIV/0!	0.0169194	#DIV/0!	0.0755134	#DIV/0!	#DIV/0!	#DIV/0!	#DIV/0!	#DIV/0!	#DIV/0!	#DIV/0!	#DIV/0!	#DIV/0!	0.000781704	#DIV/0!	#DIV/0!	#DIV/0!	#DIV/0!	#DIV/0!	#DIV/0!	#DIV/0!	0.0119675	#DIV/0!	#DIV/0!	#DIV/0!	#DIV/0!
928	HB	P-sat	CSl	137	Superior central nucleus raphe, lateral part	#DIV/0!	#DIV/0!	#DIV/0!	#DIV/0!	#DIV/0!	#DIV/0!	#DIV/0!	#DIV/0!	#DIV/0!	#DIV/0!	#DIV/0!	#DIV/0!	#DIV/0!	#DIV/0!	#DIV/0!	#DIV/0!	#DIV/0!	#DIV/0!	#DIV/0!	#DIV/0!	#DIV/0!	#DIV/0!	#DIV/0!	#DIV/0!	#DIV/0!	#DIV/0!	#DIV/0!	#DIV/0!
929	HB	P-sat	CSm	130	Superior central nucleus raphe, medial part	#DIV/0!	#DIV/0!	#DIV/0!	#DIV/0!	#DIV/0!	#DIV/0!	#DIV/0!	#DIV/0!	#DIV/0!	#DIV/0!	#DIV/0!	#DIV/0!	#DIV/0!	#DIV/0!	#DIV/0!	#DIV/0!	#DIV/0!	#DIV/0!	#DIV/0!	#DIV/0!	#DIV/0!	#DIV/0!	#DIV/0!	#DIV/0!	#DIV/0!	#DIV/0!	#DIV/0!	#DIV/0!
930	HB	P-sat	LC	147	Locus ceruleus	#DIV/0!	0.0276232	0.0499556	#DIV/0!	0.0928808	0.0847749	0.0653751	#DIV/0!	0.083385	0.108858	0.0847528	0.0835012	0.00112537	#DIV/0!	#DIV/0!	#DIV/0!	0.0101767	0.0490303	0.0088648	0.0187247	0.0548731	#DIV/0!	0.0637865	#DIV/0!	0.0382602	0.0679607	0.0491244	0.0353597
931	HB	P-sat	LDT	162	Laterodorsal tegmental nucleus	0.0149071	0.0297244	0.0223453	0.0434177	0.0613568	0.0811911	0.101038	0.0672992	0.130462	0.101988	0.095199	0.0509644	0.000472879	0.00068319	0.00123463	0.000914982	0.0120687	0.0251173	0.0104237	0.012768	#DIV/0!	0.0269239	0.0175126	0.0625155	0.0347817	0.0501505	0.0337045	0.023447
932	HB	P-sat	NI	604	Nucleus incertus	0.0286587	0.00953155	0.0221488	0.0409681	#DIV/0!	0.0878303	#DIV/0!	#DIV/0!	#DIV/0!	#DIV/0!	0.105656	0.116473	#DIV/0!	0.00205531	#DIV/0!	#DIV/0!	0.0129816	0.0137161	#DIV/0!	0.0112008	#DIV/0!	#DIV/0!	#DIV/0!	0.0394835	#DIV/0!	0.0283125	0.0318698	0.00320247
933	HB	P-sat	PRNr	146	Pontine reticular nucleus	0.0160919	0.0216528	0.0165231	0.0244625	0.0488646	0.0547676	0.0511077	0.0445661	0.0781614	0.0741581	0.0706478	0.0827038	0.000762299	0.000868021	0.00109449	0.000677975	0.00932132	0.0108148	0.0107236	0.0273745	0.0191942	0.0194588	0.0183896	0.0223605	0.0231329	0.0294741	0.0257638	0.0254647
934	HB	P-sat	RPO	238	Nucleus raphe pontis	0.0122618	#DIV/0!	#DIV/0!	#DIV/0!	#DIV/0!	#DIV/0!	#DIV/0!	#DIV/0!	#DIV/0!	#DIV/0!	#DIV/0!	#DIV/0!	#DIV/0!	#DIV/0!	#DIV/0!	#DIV/0!	#DIV/0!	#DIV/0!	#DIV/0!	#DIV/0!	#DIV/0!	#DIV/0!	#DIV/0!	#DIV/0!	#DIV/0!	#DIV/0!	#DIV/0!	#DIV/0!
935	HB	P-sat	SLC	350	Subceruleus nucleus	#DIV/0!	0.0349781	0.0225142	#DIV/0!	0.0827358	0.0548345	0.0668346	0.0604809	0.105568	0.138619	0.0922421	0.0908984	0.00107373	0.00165946	#DIV/0!	0.00048674	0.0205766	0.0107181	0.0201292	0.0147662	0.0226403	#DIV/0!	0.0270291	#DIV/0!	0.0350792	0.0456158	0.0407899	0.0401659
936	HB	P-sat	SLD	358	Sublaterodorsal nucleus	0.0327575	0.0266031	0.0205919	0.049097	0.0740743	0.0932256	0.0943108	0.0495775	0.130592	0.0971509	0.0854428	0.107123	#DIV/0!	0.00179752	0.00219144	0.000425383	#DIV/0!	0.0181585	0.0102002	#DIV/0!	#DIV/0!	0.0230094	0.0131744	0.037137	0.0184497	0.0267853	0.0329209	0.0273482
937	HB	MY	MY	354	Medulla	0.0137128	0.0246535	0.015829	0.0215842	0.0455921	0.0344364	0.0403501	0.0494036	0.0568849	0.0600457	0.0576199	0.0685885	0.000942707	0.000823279	0.000381668	0.000772441	0.0117119	0.0111919	0.0075373	0.00813818	0.0127772	0.0138959	0.0124452	0.0183015	0.0168653	0.02295	0.0246589	0.0225497
938	HB	MY-sen	MY-sen	386	Medulla, sensory related	#DIV/0!	#DIV/0!	#DIV/0!	#DIV/0!	#DIV/0!	#DIV/0!	#DIV/0!	#DIV/0!	#DIV/0!	#DIV/0!	#DIV/0!	#DIV/0!	#DIV/0!	#DIV/0!	#DIV/0!	#DIV/0!	#DIV/0!	#DIV/0!	#DIV/0!	#DIV/0!	#DIV/0!	#DIV/0!	#DIV/0!	#DIV/0!	#DIV/0!	#DIV/0!	#DIV/0!	#DIV/0!
939	HB	MY-sen	AP	207	Area postrema	0.000333322	#DIV/0!	#DIV/0!	#DIV/0!	#DIV/0!	#DIV/0!	#DIV/0!	#DIV/0!	#DIV/0!	#DIV/0!	#DIV/0!	#DIV/0!	#DIV/0!	#DIV/0!	#DIV/0!	#DIV/0!	#DIV/0!	#DIV/0!	#DIV/0!	#DIV/0!	#DIV/0!	#DIV/0!	#DIV/0!	#DIV/0!	#DIV/0!	#DIV/0!	#DIV/0!	#DIV/0!
940	HB	MY-sen	CN	607	Cochlear nuclei	#DIV/0!	#DIV/0!	#DIV/0!	#DIV/0!	#DIV/0!	#DIV/0!	#DIV/0!	#DIV/0!	#DIV/0!	#DIV/0!	#DIV/0!	#DIV/0!	#DIV/0!	#DIV/0!	#DIV/0!	#DIV/0!	#DIV/0!	#DIV/0!	#DIV/0!	#DIV/0!	#DIV/0!	#DIV/0!	#DIV/0!	#DIV/0!	#DIV/0!	#DIV/0!	#DIV/0!	#DIV/0!
941	HB	MY-sen	CNlam	112	Granular lamina of the cochlear nuclei	#DIV/0!	#DIV/0!	#DIV/0!	#DIV/0!	#DIV/0!	#DIV/0!	#DIV/0!	#DIV/0!	#DIV/0!	#DIV/0!	#DIV/0!	#DIV/0!	#DIV/0!	#DIV/0!	#DIV/0!	#DIV/0!	#DIV/0!	#DIV/0!	#DIV/0!	#DIV/0!	#DIV/0!	#DIV/0!	#DIV/0!	#DIV/0!	#DIV/0!	#DIV/0!	#DIV/0!	#DIV/0!
942	HB	MY-sen	CNspg	560	Cochlear nucleus, subpedunclular granular region	#DIV/0!	#DIV/0!	#DIV/0!	#DIV/0!	#DIV/0!	#DIV/0!	#DIV/0!	#DIV/0!	#DIV/0!	#DIV/0!	#DIV/0!	#DIV/0!	#DIV/0!	#DIV/0!	#DIV/0!	#DIV/0!	#DIV/0!	#DIV/0!	#DIV/0!	#DIV/0!	#DIV/0!	#DIV/0!	#DIV/0!	#DIV/0!	#DIV/0!	#DIV/0!	#DIV/0!	#DIV/0!
943	HB	MY-sen	DCO	96	Dorsal cochlear nucleus	#DIV/0!	#DIV/0!	#DIV/0!	#DIV/0!	#DIV/0!	#DIV/0!	#DIV/0!	#DIV/0!	#DIV/0!	#DIV/0!	#DIV/0!	#DIV/0!	#DIV/0!	#DIV/0!	#DIV/0!	#DIV/0!	#DIV/0!	#DIV/0!	#DIV/0!	#DIV/0!	#DIV/0!	#DIV/0!	#DIV/0!	#DIV/0!	#DIV/0!	#DIV/0!	#DIV/0!	#DIV/0!
944	HB	MY-sen	VCO	101	Ventral cochlear nucleus	#DIV/0!	#DIV/0!	#DIV/0!	#DIV/0!	#DIV/0!	#DIV/0!	#DIV/0!	#DIV/0!	#DIV/0!	#DIV/0!	#DIV/0!	#DIV/0!	#DIV/0!	#DIV/0!	#DIV/0!	#DIV/0!	#DIV/0!	#DIV/0!	#DIV/0!	#DIV/0!	#DIV/0!	#DIV/0!	#DIV/0!	#DIV/0!	#DIV/0!	#DIV/0!	#DIV/0!	#DIV/0!
945	HB	MY-sen	DCN	720	Dorsal column nuclei	#DIV/0!	#DIV/0!	#DIV/0!	#DIV/0!	#DIV/0!	#DIV/0!	#DIV/0!	#DIV/0!	#DIV/0!	#DIV/0!	#DIV/0!	#DIV/0!	#DIV/0!	#DIV/0!	#DIV/0!	#DIV/0!	#DIV/0!	#DIV/0!	#DIV/0!	#DIV/0!	#DIV/0!	#DIV/0!	#DIV/0!	#DIV/0!	#DIV/0!	#DIV/0!	#DIV/0!	#DIV/0!
946	HB	MY-sen	CU	711	Cuneate nucleus	0.0173287	0.0328119	0.0100597	0.0196016	0.0547766	0.0493167	0.0481193	0.0796577	0.0449582	0.0422527	0.0510764	0.0635705	0.00021363	0.000617066	0.000810862	0.00145507	0.0048114	0.0100485	0.00946108	0.0142887	0.0125468	0.0299757	0.0181476	0.0211804	0.0249299	0.0330775	0.0355359	0.0356599
947	HB	MY-sen	GR	1039	Gracile nucleus	0.00476484	0.000987294	#DIV/0!	0.0235806	#DIV/0!	0.031858	#DIV/0!	#DIV/0!	#DIV/0!	#DIV/0!	0.00635922	0.00742528	#DIV/0!	#DIV/0!	#DIV/0!	0.000353036	#DIV/0!	0.0154916	#DIV/0!	0.00828555	#DIV/0!	#DIV/0!	#DIV/0!	0.0118661	#DIV/0!	0.0228334	0.0263307	0.00107894
948	HB	MY-sen	ECU	903	External cuneate nucleus	0.000311207	0.0383108	0.00320325	0.0219932	0.0477052	0.0252699	0.0485799	0.0604869	#DIV/0!	#DIV/0!	0.103803	0.0407546	#DIV/0!	0.0012519	0.000993607	#DIV/0!	0.00843235	0.0104011	0.00255037	0.00916214	0.0127812	0.020118	0.00835278	0.0176724	0.015792	0.0441744	0.0309237	0.0233895
949	HB	MY-sen	NTB	642	Nucleus of the trapezoid body	0.00966134	0.0251294	0.040167	0.0293331	0.0762991	0.0289324	0.075192	0.0472447	0.0832428	0.105624	0.096844	0.105413	0.00184046	0.00160975	0.00204801	0.00142486	0.015843	0.0297762	0.0157739	0.0124805	#DIV/0!	0.029077	0.0204529	0.0288072	0.0120939	0.010127	0.0437758	0.013584
950	HB	MY-sen	NTS	651	Nucleus of the solitary tract	0.0124252	0.0174893	0.0171904	0.029915	0.0800964	0.0653592	0.0657408	0.0818991	0.108251	0.109648	0.0956738	0.117768	0.000701334	0.000757982	0.000622194	0.000684984	0.0114795	0.0157756	0.0168315	0.0127934	0.0235601	0.0375651	0.0318573	0.0311096	0.0433318	0.0339907	0.0458859	0.0295298
951	HB	MY-sen	NTSce	659	Nucleus of the solitary tract, central part	#DIV/0!	#DIV/0!	#DIV/0!	#DIV/0!	#DIV/0!	#DIV/0!	#DIV/0!	#DIV/0!	#DIV/0!	#DIV/0!	#DIV/0!	#DIV/0!	#DIV/0!	#DIV/0!	#DIV/0!	#DIV/0!	#DIV/0!	#DIV/0!	#DIV/0!	#DIV/0!	#DIV/0!	#DIV/0!	#DIV/0!	#DIV/0!	#DIV/0!	#DIV/0!	#DIV/0!	#DIV/0!
952	HB	MY-sen	NTSco	666	Nucleus of the solitary tract, commissural part	#DIV/0!	#DIV/0!	#DIV/0!	#DIV/0!	#DIV/0!	#DIV/0!	#DIV/0!	#DIV/0!	#DIV/0!	#DIV/0!	#DIV/0!	#DIV/0!	#DIV/0!	#DIV/0!	#DIV/0!	#DIV/0!	#DIV/0!	#DIV/0!	#DIV/0!	#DIV/0!	#DIV/0!	#DIV/0!	#DIV/0!	#DIV/0!	#DIV/0!	#DIV/0!	#DIV/0!	#DIV/0!
953	HB	MY-sen	NTSge	674	Nucleus of the solitary tract, gelatinous part	#DIV/0!	#DIV/0!	#DIV/0!	#DIV/0!	#DIV/0!	#DIV/0!	#DIV/0!	#DIV/0!	#DIV/0!	#DIV/0!	#DIV/0!	#DIV/0!	#DIV/0!	#DIV/0!	#DIV/0!	#DIV/0!	#DIV/0!	#DIV/0!	#DIV/0!	#DIV/0!	#DIV/0!	#DIV/0!	#DIV/0!	#DIV/0!	#DIV/0!	#DIV/0!	#DIV/0!	#DIV/0!
954	HB	MY-sen	NTSl	682	Nucleus of the solitary tract, lateral part	#DIV/0!	#DIV/0!	#DIV/0!	#DIV/0!	#DIV/0!	#DIV/0!	#DIV/0!	#DIV/0!	#DIV/0!	#DIV/0!	#DIV/0!	#DIV/0!	#DIV/0!	#DIV/0!	#DIV/0!	#DIV/0!	#DIV/0!	#DIV/0!	#DIV/0!	#DIV/0!	#DIV/0!	#DIV/0!	#DIV/0!	#DIV/0!	#DIV/0!	#DIV/0!	#DIV/0!	#DIV/0!
955	HB	MY-sen	NTSm	691	Nucleus of the solitary tract, medial part	#DIV/0!	#DIV/0!	#DIV/0!	#DIV/0!	#DIV/0!	#DIV/0!	#DIV/0!	#DIV/0!	#DIV/0!	#DIV/0!	#DIV/0!	#DIV/0!	#DIV/0!	#DIV/0!	#DIV/0!	#DIV/0!	#DIV/0!	#DIV/0!	#DIV/0!	#DIV/0!	#DIV/0!	#DIV/0!	#DIV/0!	#DIV/0!	#DIV/0!	#DIV/0!	#DIV/0!	#DIV/0!
956	HB	MY-sen	SPVC	429	Spinal nucleus of the trigeminal, caudal part	0.00569389	0.0157517	0.0150773	0.0114285	#DIV/0!	0.0423977	0.0458861	0.0637	0.097347	#DIV/0!	0.0763128	0.0848082	0.00116014	#DIV/0!	#DIV/0!	0.000784727	0.0219396	0.00492832	0.00817125	0.0117318	0.0136862	0.0133415	0.0136131	0.0119798	0.0157684	0.0442952	0.0305171	0.0259284
957	HB	MY-sen	SPVI	437	Spinal nucleus of the trigeminal, interpolar part	#DIV/0!	#DIV/0!	#DIV/0!	#DIV/0!	0.0521322	#DIV/0!	0.0680834	#DIV/0!	#DIV/0!	#DIV/0!	#DIV/0!	#DIV/0!	#DIV/0!	#DIV/0!	#DIV/0!	#DIV/0!	#DIV/0!	0.0352429	#DIV/0!	#DIV/0!	0.0225893	0.0297819	#DIV/0!	0.0318732	0.0359864	#DIV/0!	#DIV/0!	#DIV/0!
958	HB	MY-sen	SPVO	445	Spinal nucleus of the trigeminal, oral part	#DIV/0!	#DIV/0!	#DIV/0!	#DIV/0!	#DIV/0!	#DIV/0!	0.039371	#DIV/0!	#DIV/0!	#DIV/0!	#DIV/0!	#DIV/0!	#DIV/0!	#DIV/0!	#DIV/0!	#DIV/0!	#DIV/0!	#DIV/0!	#DIV/0!	#DIV/0!	0.0225486	0.0482003	#DIV/0!	#DIV/0!	#DIV/0!	#DIV/0!	#DIV/0!	#DIV/0!
959	HB	MY-sen	SPVOcdm	77	Spinal nucleus of the trigeminal, oral part, caudal dorsomedial part	#DIV/0!	#DIV/0!	#DIV/0!	#DIV/0!	#DIV/0!	#DIV/0!	#DIV/0!	#DIV/0!	#DIV/0!	#DIV/0!	#DIV/0!	#DIV/0!	#DIV/0!	#DIV/0!	#DIV/0!	#DIV/0!	#DIV/0!	#DIV/0!	#DIV/0!	#DIV/0!	#DIV/0!	#DIV/0!	#DIV/0!	#DIV/0!	#DIV/0!	#DIV/0!	#DIV/0!	#DIV/0!
960	HB	MY-sen	SPVOmdmd	53	Spinal nucleus of the trigeminal, oral part, middle dorsomedial part, dorsal zone	#DIV/0!	#DIV/0!	#DIV/0!	#DIV/0!	#DIV/0!	#DIV/0!	#DIV/0!	#DIV/0!	#DIV/0!	#DIV/0!	#DIV/0!	#DIV/0!	#DIV/0!	#DIV/0!	#DIV/0!	#DIV/0!	#DIV/0!	#DIV/0!	#DIV/0!	#DIV/0!	#DIV/0!	#DIV/0!	#DIV/0!	#DIV/0!	#DIV/0!	#DIV/0!	#DIV/0!	#DIV/0!
961	HB	MY-sen	SPVOmdmv	61	Spinal nucleus of the trigeminal, oral part, middle dorsomedial part, ventral zone	#DIV/0!	#DIV/0!	#DIV/0!	#DIV/0!	#DIV/0!	#DIV/0!	#DIV/0!	#DIV/0!	#DIV/0!	#DIV/0!	#DIV/0!	#DIV/0!	#DIV/0!	#DIV/0!	#DIV/0!	#DIV/0!	#DIV/0!	#DIV/0!	#DIV/0!	#DIV/0!	#DIV/0!	#DIV/0!	#DIV/0!	#DIV/0!	#DIV/0!	#DIV/0!	#DIV/0!	#DIV/0!
962	HB	MY-sen	SPVOrdm	45	Spinal nucleus of the trigeminal, oral part, rostral dorsomedial part	#DIV/0!	#DIV/0!	#DIV/0!	#DIV/0!	#DIV/0!	#DIV/0!	#DIV/0!	#DIV/0!	#DIV/0!	#DIV/0!	#DIV/0!	#DIV/0!	#DIV/0!	#DIV/0!	#DIV/0!	#DIV/0!	#DIV/0!	#DIV/0!	#DIV/0!	#DIV/0!	#DIV/0!	#DIV/0!	#DIV/0!	#DIV/0!	#DIV/0!	#DIV/0!	#DIV/0!	#DIV/0!
963	HB	MY-sen	SPVOvl	69	Spinal nucleus of the trigeminal, oral part, ventrolateral part	#DIV/0!	#DIV/0!	#DIV/0!	#DIV/0!	#DIV/0!	#DIV/0!	#DIV/0!	#DIV/0!	#DIV/0!	#DIV/0!	#DIV/0!	#DIV/0!	#DIV/0!	#DIV/0!	#DIV/0!	#DIV/0!	#DIV/0!	#DIV/0!	#DIV/0!	#DIV/0!	#DIV/0!	#DIV/0!	#DIV/0!	#DIV/0!	#DIV/0!	#DIV/0!	#DIV/0!	#DIV/0!
964	HB	MY-sen	Pa5	589508451	Paratrigeminal nucleus	#DIV/0!	#DIV/0!	#DIV/0!	#DIV/0!	#DIV/0!	#DIV/0!	#DIV/0!	#DIV/0!	#DIV/0!	#DIV/0!	#DIV/0!	#DIV/0!	#DIV/0!	#DIV/0!	#DIV/0!	#DIV/0!	#DIV/0!	#DIV/0!	#DIV/0!	#DIV/0!	0.0163383	#DIV/0!	#DIV/0!	#DIV/0!	#DIV/0!	#DIV/0!	#DIV/0!	#DIV/0!
965	HB	MY-sen	z	789	Nucleus z	#DIV/0!	#DIV/0!	#DIV/0!	#DIV/0!	#DIV/0!	#DIV/0!	#DIV/0!	#DIV/0!	#DIV/0!	#DIV/0!	#DIV/0!	#DIV/0!	#DIV/0!	#DIV/0!	#DIV/0!	#DIV/0!	#DIV/0!	#DIV/0!	#DIV/0!	#DIV/0!	#DIV/0!	#DIV/0!	#DIV/0!	#DIV/0!	#DIV/0!	#DIV/0!	#DIV/0!	#DIV/0!
966	HB	MY-mot	MY-mot	370	Medulla, motor related	#DIV/0!	#DIV/0!	#DIV/0!	#DIV/0!	#DIV/0!	#DIV/0!	#DIV/0!	#DIV/0!	#DIV/0!	#DIV/0!	#DIV/0!	#DIV/0!	#DIV/0!	#DIV/0!	#DIV/0!	#DIV/0!	#DIV/0!	#DIV/0!	#DIV/0!	#DIV/0!	#DIV/0!	#DIV/0!	#DIV/0!	#DIV/0!	#DIV/0!	#DIV/0!	#DIV/0!	#DIV/0!
967	HB	MY-mot	VI	653	Abducens nucleus	0.0201046	0.0366925	0.0218952	0.04113	#DIV/0!	0.0591567	#DIV/0!	#DIV/0!	#DIV/0!	#DIV/0!	0.0972075	0.0872521	0.00257931	0.00301407	#DIV/0!	0.000706283	0.00710038	0.00543488	#DIV/0!	0.0131676	#DIV/0!	#DIV/0!	#DIV/0!	0.0270419	#DIV/0!	0.0132955	0.00512804	0.0199305
968	HB	MY-mot	ACVI	568	Accessory abducens nucleus	#DIV/0!	#DIV/0!	#DIV/0!	#DIV/0!	#DIV/0!	#DIV/0!	#DIV/0!	#DIV/0!	#DIV/0!	#DIV/0!	#DIV/0!	#DIV/0!	#DIV/0!	#DIV/0!	#DIV/0!	#DIV/0!	#DIV/0!	#DIV/0!	#DIV/0!	#DIV/0!	#DIV/0!	#DIV/0!	#DIV/0!	#DIV/0!	#DIV/0!	#DIV/0!	#DIV/0!	#DIV/0!
969	HB	MY-mot	VII	661	Facial motor nucleus	0.0209692	0.0149802	0.0182069	0.03971	0.0699669	0.0169014	0.0459034	0.0435878	0.0780273	#DIV/0!	0.0586666	0.0632325	0.000695801	0.00056162	0.000343676	0.000149676	0.0171832	0.00979637	0.0125158	0.0202355	0.0165534	0.00969783	0.0256453	0.0148985	0.0242253	0.0268366	0.0182733	0.0198884
970	HB	MY-mot	ACVII	576	Accessory facial motor nucleus	0.0126443	#DIV/0!	0.0191707	0.0342704	#DIV/0!	#DIV/0!	0.0675607	0.0400241	#DIV/0!	#DIV/0!	#DIV/0!	0.0393118	#DIV/0!	#DIV/0!	0.000825577	#DIV/0!	0.0141524	#DIV/0!	0.00303818	#DIV/0!	#DIV/0!	#DIV/0!	#DIV/0!	#DIV/0!	#DIV/0!	0.0114586	#DIV/0!	0.00953614
971	HB	MY-mot	EV	640	Efferent vestibular nucleus	#DIV/0!	#DIV/0!	#DIV/0!	#DIV/0!	#DIV/0!	#DIV/0!	#DIV/0!	#DIV/0!	#DIV/0!	#DIV/0!	#DIV/0!	#DIV/0!	#DIV/0!	#DIV/0!	#DIV/0!	#DIV/0!	#DIV/0!	#DIV/0!	#DIV/0!	#DIV/0!	#DIV/0!	#DIV/0!	#DIV/0!	#DIV/0!	#DIV/0!	#DIV/0!	#DIV/0!	#DIV/0!
972	HB	MY-mot	AMB	135	Nucleus ambiguus	#DIV/0!	#DIV/0!	#DIV/0!	#DIV/0!	#DIV/0!	#DIV/0!	#DIV/0!	#DIV/0!	#DIV/0!	#DIV/0!	#DIV/0!	#DIV/0!	#DIV/0!	#DIV/0!	#DIV/0!	#DIV/0!	#DIV/0!	#DIV/0!	#DIV/0!	#DIV/0!	#DIV/0!	#DIV/0!	#DIV/0!	#DIV/0!	#DIV/0!	#DIV/0!	#DIV/0!	#DIV/0!
973	HB	MY-mot	AMBd	939	Nucleus ambiguus, dorsal division	#DIV/0!	#DIV/0!	#DIV/0!	#DIV/0!	#DIV/0!	#DIV/0!	0.0534409	#DIV/0!	0.309682	#DIV/0!	#DIV/0!	#DIV/0!	#DIV/0!	#DIV/0!	#DIV/0!	#DIV/0!	#DIV/0!	#DIV/0!	#DIV/0!	#DIV/0!	#DIV/0!	0.0227083	#DIV/0!	#DIV/0!	#DIV/0!	#DIV/0!	#DIV/0!	#DIV/0!
974	HB	MY-mot	AMBv	143	Nucleus ambiguus, ventral division	#DIV/0!	#DIV/0!	#DIV/0!	#DIV/0!	#DIV/0!	#DIV/0!	#DIV/0!	#DIV/0!	#DIV/0!	#DIV/0!	#DIV/0!	#DIV/0!	#DIV/0!	#DIV/0!	#DIV/0!	#DIV/0!	#DIV/0!	#DIV/0!	#DIV/0!	#DIV/0!	0.014999	0.0190456	#DIV/0!	0.0134449	0.0172959	#DIV/0!	#DIV/0!	#DIV/0!
975	HB	MY-mot	DMX	839	Dorsal motor nucleus of the vagus nerve	0.017316	0.013373	0.0153034	0.0347644	0.0675748	0.0611959	0.0856621	0.0729342	0.0557553	0.109011	0.0943684	0.100464	0.00089769	#DIV/0!	0.000694976	0.0006925	0.0104722	0.0169588	0.0156151	0.0142712	#DIV/0!	0.0341128	0.0299837	0.0390328	0.0350715	0.0443525	0.0459659	0.0117089
976	HB	MY-mot	ECO	887	Efferent cochlear group	#DIV/0!	#DIV/0!	#DIV/0!	#DIV/0!	#DIV/0!	#DIV/0!	#DIV/0!	#DIV/0!	#DIV/0!	#DIV/0!	#DIV/0!	#DIV/0!	#DIV/0!	#DIV/0!	#DIV/0!	#DIV/0!	#DIV/0!	#DIV/0!	#DIV/0!	#DIV/0!	#DIV/0!	#DIV/0!	#DIV/0!	#DIV/0!	#DIV/0!	#DIV/0!	#DIV/0!	#DIV/0!
977	HB	MY-mot	GRN	1048	Gigantocellular reticular nucleus	0.0138771	0.0246078	0.0175671	0.022315	0.0469494	0.0444774	0.0490804	0.0428848	0.0745707	0.0651389	0.0629389	0.0600358	0.00103787	0.000996097	0.00154402	0.000929896	0.00994492	0.0113021	0.0100441	0.0220539	#DIV/0!	0.0211747	0.0209834	0.0198975	0.019138	0.022093	0.0227725	0.0341865
978	HB	MY-mot	ICB	372	Infracerebellar nucleus	#DIV/0!	#DIV/0!	#DIV/0!	#DIV/0!	0.0502479	#DIV/0!	0.0329692	#DIV/0!	#DIV/0!	#DIV/0!	0.109579	#DIV/0!	#DIV/0!	#DIV/0!	#DIV/0!	#DIV/0!	#DIV/0!	0.00671462	#DIV/0!	#DIV/0!	0.0116937	0.0103135	#DIV/0!	0.0160549	0.0103734	#DIV/0!	#DIV/0!	#DIV/0!
979	HB	MY-mot	IO	83	Inferior olivary complex	0.0188462	0.0457929	0.0378747	0.0359734	0.0529029	0.0393921	0.0513162	0.029476	0.0845665	0.0861044	0.0594767	0.0853886	0.000431405	0.000803712	0.000768639	0.000714667	0.0316622	0.00842333	0.0088586	0.0163646	0.00190534	0.0231069	0.00755041	0.0233067	0.0214977	0.000336596	0.0318062	0.0261781
980	HB	MY-mot	IRN	136	Intermediate reticular nucleus	0.0194948	0.0168655	0.0157415	0.0259996	0.0594155	0.0400437	0.0509923	0.0491598	0.347351	0.0720969	0.0646194	0.0684086	0.000621744	0.000806299	0.000423824	0.000524204	0.0129609	0.0111139	0.00903812	0.0114554	0.0129314	0.0170175	0.0143292	0.02215	0.0195484	0.0215582	0.022574	0.0210782
981	HB	MY-mot	ISN	106	Inferior salivatory nucleus	#DIV/0!	#DIV/0!	#DIV/0!	#DIV/0!	#DIV/0!	#DIV/0!	0.0693887	#DIV/0!	0.0256949	#DIV/0!	#DIV/0!	#DIV/0!	#DIV/0!	#DIV/0!	#DIV/0!	#DIV/0!	#DIV/0!	#DIV/0!	#DIV/0!	#DIV/0!	#DIV/0!	0.021014	#DIV/0!	#DIV/0!	#DIV/0!	#DIV/0!	#DIV/0!	#DIV/0!
982	HB	MY-mot	LIN	203	Linear nucleus of the medulla	0.00702112	0.0176855	0.0199146	0.0471504	0.0710911	0.0281966	0.0453497	0.0533881	0.0728358	0.071045	0.0684552	0.061192	0.00981633	0.00183737	0.00558274	0.00422579	0.0163942	0.0238604	0.0122721	0.00405545	0.0113324	0.0263322	0.0134288	0.0219935	0.0222086	0.0160462	0.0297558	0.0287899
983	HB	MY-mot	LRN	235	Lateral reticular nucleus	#DIV/0!	#DIV/0!	#DIV/0!	#DIV/0!	#DIV/0!	#DIV/0!	#DIV/0!	#DIV/0!	#DIV/0!	#DIV/0!	#DIV/0!	#DIV/0!	#DIV/0!	#DIV/0!	#DIV/0!	#DIV/0!	#DIV/0!	#DIV/0!	#DIV/0!	#DIV/0!	#DIV/0!	#DIV/0!	#DIV/0!	#DIV/0!	#DIV/0!	#DIV/0!	#DIV/0!	#DIV/0!
984	HB	MY-mot	LRNm	955	Lateral reticular nucleus, magnocellular part	0.00508455	0.0242579	0.022652	0.0268425	0.051024	0.0368629	0.0456338	0.0407281	0.0900228	0.0448938	0.0565197	0.0619671	0.00252033	0.00317208	0.00149602	0.0031499	0.0264847	0.0208894	0.0132307	0.0133903	0.0150229	0.0296945	0.0244936	0.0304043	0.0253261	0.0206432	0.0320617	0.0342952
985	HB	MY-mot	LRNp	963	Lateral reticular nucleus, parvicellular part	#DIV/0!	#DIV/0!	#DIV/0!	#DIV/0!	#DIV/0!	#DIV/0!	#DIV/0!	#DIV/0!	#DIV/0!	#DIV/0!	#DIV/0!	#DIV/0!	#DIV/0!	#DIV/0!	#DIV/0!	#DIV/0!	#DIV/0!	#DIV/0!	#DIV/0!	#DIV/0!	#DIV/0!	#DIV/0!	#DIV/0!	#DIV/0!	#DIV/0!	#DIV/0!	#DIV/0!	#DIV/0!
986	HB	MY-mot	MARN	307	Magnocellular reticular nucleus	0.0195179	0.0287557	0.0199067	0.0317046	0.0534288	0.0454639	0.0528989	0.028322	0.0693637	0.0470922	0.0931269	0.0755774	0.00211324	0.00102224	0.00174406	0.00231505	0.0167316	0.033291	0.0216922	0.0147106	#DIV/0!	0.0360495	0.0301332	0.0279421	0.0294233	0.0239299	0.0365752	0.0280951
987	HB	MY-mot	MDRN	395	Medullary reticular nucleus	#DIV/0!	#DIV/0!	#DIV/0!	#DIV/0!	#DIV/0!	#DIV/0!	#DIV/0!	#DIV/0!	#DIV/0!	#DIV/0!	#DIV/0!	#DIV/0!	#DIV/0!	#DIV/0!	#DIV/0!	#DIV/0!	#DIV/0!	#DIV/0!	#DIV/0!	#DIV/0!	#DIV/0!	#DIV/0!	#DIV/0!	#DIV/0!	#DIV/0!	#DIV/0!	#DIV/0!	#DIV/0!
988	HB	MY-mot	MDRNd	1098	Medullary reticular nucleus, dorsal part	0.0254301	0.0220603	0.0266298	0.0320075	0.0699968	0.0573441	0.0564411	0.0548095	0.0860184	0.100778	0.0719608	0.0966949	0.00041257	0.000877815	0.000264907	0.000625275	0.0195387	0.0155799	0.0125936	0.0141388	0.016771	0.0267171	0.0192423	0.0193468	0.0251472	0.030533	0.0290482	0.0207351
989	HB	MY-mot	MDRNv	1107	Medullary reticular nucleus, ventral part	0.0144521	0.0203913	0.0205925	0.0183535	0.0444657	0.0354441	0.0560662	0.0313599	0.0778988	0.0597809	0.0727073	0.0680412	0.00100333	0.000372037	0.000262986	0.000534715	0.0196195	0.0129078	0.00991629	0.00889947	0.00848774	0.0207177	0.0144166	0.0181335	0.014371	0.0176591	0.0295642	0.0221556
990	HB	MY-mot	PARN	852	Parvicellular reticular nucleus	0.0163422	0.0262697	0.0232999	0.0286167	0.0749961	0.0607313	0.0553504	0.0646014	0.0991893	0.085353	0.0706334	0.0851621	0.000509188	0.000676454	0.000340156	0.000865425	0.0146358	0.0194631	0.0108041	0.0115083	0.0135918	0.0256031	0.0141063	0.0199779	0.0225183	0.029115	0.0345157	0.0275045
991	HB	MY-mot	PAS	859	Parasolitary nucleus	0.00424264	0.0385772	0.0204757	0.0155096	0.0836146	0.0776973	0.0536797	0.105926	0.123291	0.086601	0.131608	0.102238	0.00164816	3.6361e-05	#DIV/0!	0.000836293	0.0159329	0.0110191	0.0207539	0.0132355	0.067012	0.0238011	0.0284896	0.0210294	0.04358	0.028398	0.0509887	0.0590683
992	HB	MY-mot	PGRN	938	Paragigantocellular reticular nucleus	#DIV/0!	#DIV/0!	#DIV/0!	#DIV/0!	#DIV/0!	#DIV/0!	#DIV/0!	#DIV/0!	#DIV/0!	#DIV/0!	#DIV/0!	#DIV/0!	#DIV/0!	#DIV/0!	#DIV/0!	#DIV/0!	#DIV/0!	#DIV/0!	#DIV/0!	#DIV/0!	#DIV/0!	#DIV/0!	#DIV/0!	#DIV/0!	#DIV/0!	#DIV/0!	#DIV/0!	#DIV/0!
993	HB	MY-mot	PGRNd	970	Paragigantocellular reticular nucleus, dorsal part	0.0235368	0.0150965	0.0197252	0.0280268	#DIV/0!	0.0634073	#DIV/0!	#DIV/0!	#DIV/0!	#DIV/0!	0.0608886	0.0622201	0.000353298	0.000868121	#DIV/0!	0.000502604	0.0119383	0.0108629	#DIV/0!	0.012681	#DIV/0!	#DIV/0!	#DIV/0!	0.0215305	0.0196655	0.022093	0.0259834	0.0176576
994	HB	MY-mot	PGRNl	978	Paragigantocellular reticular nucleus, lateral part	0.0171609	0.0223535	0.0258165	0.0350023	0.0710152	0.0376433	0.0512012	0.0497086	0.0887176	0.0760652	0.0740584	0.0713703	0.00162041	0.00201028	0.00190422	0.00217169	0.0247661	0.0251099	0.0211428	0.0163988	0.0222782	0.0279341	0.036847	0.0244717	0.0325046	0.0328902	0.0395479	0.0317841
995	HB	MY-mot	PHY	154	Perihypoglossal nuclei	#DIV/0!	#DIV/0!	#DIV/0!	#DIV/0!	#DIV/0!	#DIV/0!	#DIV/0!	#DIV/0!	#DIV/0!	#DIV/0!	#DIV/0!	#DIV/0!	#DIV/0!	#DIV/0!	#DIV/0!	#DIV/0!	#DIV/0!	#DIV/0!	#DIV/0!	#DIV/0!	#DIV/0!	#DIV/0!	#DIV/0!	#DIV/0!	#DIV/0!	#DIV/0!	#DIV/0!	#DIV/0!
996	HB	MY-mot	NIS	161	Nucleus intercalatus	#DIV/0!	#DIV/0!	#DIV/0!	#DIV/0!	#DIV/0!	#DIV/0!	#DIV/0!	#DIV/0!	#DIV/0!	#DIV/0!	#DIV/0!	#DIV/0!	#DIV/0!	#DIV/0!	#DIV/0!	#DIV/0!	#DIV/0!	#DIV/0!	#DIV/0!	#DIV/0!	#DIV/0!	#DIV/0!	#DIV/0!	#DIV/0!	#DIV/0!	#DIV/0!	#DIV/0!	#DIV/0!
997	HB	MY-mot	NR	177	Nucleus of Roller	#DIV/0!	#DIV/0!	#DIV/0!	0.0200055	#DIV/0!	0.0256196	#DIV/0!	#DIV/0!	#DIV/0!	#DIV/0!	#DIV/0!	#DIV/0!	#DIV/0!	#DIV/0!	#DIV/0!	0.000565392	#DIV/0!	#DIV/0!	#DIV/0!	#DIV/0!	#DIV/0!	#DIV/0!	#DIV/0!	0.0291101	#DIV/0!	#DIV/0!	#DIV/0!	#DIV/0!
998	HB	MY-mot	PRP	169	Nucleus prepositus	0.0184528	0.0110139	0.0338697	0.0476192	#DIV/0!	0.0868122	#DIV/0!	#DIV/0!	#DIV/0!	#DIV/0!	#DIV/0!	0.0976029	#DIV/0!	5.90748e-06	#DIV/0!	0.00252142	0.0185074	0.00745041	#DIV/0!	#DIV/0!	#DIV/0!	#DIV/0!	#DIV/0!	0.0398421	#DIV/0!	0.0140075	0.0307385	#DIV/0!
999	HB	MY-mot	PMR	995	Paramedian reticular nucleus	#DIV/0!	#DIV/0!	#DIV/0!	#DIV/0!	#DIV/0!	#DIV/0!	#DIV/0!	#DIV/0!	#DIV/0!	#DIV/0!	#DIV/0!	#DIV/0!	#DIV/0!	#DIV/0!	#DIV/0!	#DIV/0!	#DIV/0!	#DIV/0!	#DIV/0!	#DIV/0!	#DIV/0!	#DIV/0!	#DIV/0!	#DIV/0!	#DIV/0!	#DIV/0!	#DIV/0!	#DIV/0!
1000	HB	MY-mot	PPY	1069	Parapyramidal nucleus	0.00750187	0.0304012	0.0264508	0.0397416	0.0683052	0.0170547	0.0563709	0.042801	0.0545164	0.0729598	0.0736747	0.0642608	0.00345358	0.000237833	0.00187754	0.00182758	#DIV/0!	0.0195686	0.00629418	0.0147558	#DIV/0!	0.0185176	0.00880934	0.0168302	0.0352649	0.0092668	0.0370653	0.00546609
1001	HB	MY-mot	PPYd	185	Parapyramidal nucleus, deep part	#DIV/0!	#DIV/0!	#DIV/0!	#DIV/0!	#DIV/0!	#DIV/0!	#DIV/0!	#DIV/0!	#DIV/0!	#DIV/0!	#DIV/0!	#DIV/0!	#DIV/0!	#DIV/0!	#DIV/0!	#DIV/0!	#DIV/0!	#DIV/0!	#DIV/0!	#DIV/0!	#DIV/0!	#DIV/0!	#DIV/0!	#DIV/0!	#DIV/0!	#DIV/0!	#DIV/0!	#DIV/0!
1002	HB	MY-mot	PPYs	193	Parapyramidal nucleus, superficial part	#DIV/0!	#DIV/0!	#DIV/0!	#DIV/0!	#DIV/0!	#DIV/0!	#DIV/0!	#DIV/0!	#DIV/0!	#DIV/0!	#DIV/0!	#DIV/0!	#DIV/0!	#DIV/0!	#DIV/0!	#DIV/0!	#DIV/0!	#DIV/0!	#DIV/0!	#DIV/0!	#DIV/0!	#DIV/0!	#DIV/0!	#DIV/0!	#DIV/0!	#DIV/0!	#DIV/0!	#DIV/0!
1003	HB	MY-mot	VNC	701	Vestibular nuclei	#DIV/0!	#DIV/0!	#DIV/0!	#DIV/0!	#DIV/0!	#DIV/0!	#DIV/0!	#DIV/0!	#DIV/0!	#DIV/0!	#DIV/0!	#DIV/0!	#DIV/0!	#DIV/0!	#DIV/0!	#DIV/0!	#DIV/0!	#DIV/0!	#DIV/0!	#DIV/0!	#DIV/0!	#DIV/0!	#DIV/0!	#DIV/0!	#DIV/0!	#DIV/0!	#DIV/0!	#DIV/0!
1004	HB	MY-mot	LAV	209	Lateral vestibular nucleus	#DIV/0!	#DIV/0!	#DIV/0!	#DIV/0!	0.0258585	#DIV/0!	0.0473616	#DIV/0!	0.0248224	#DIV/0!	0.204442	#DIV/0!	#DIV/0!	#DIV/0!	#DIV/0!	#DIV/0!	#DIV/0!	0.003149	#DIV/0!	#DIV/0!	0.0115446	0.00883269	#DIV/0!	0.014966	0.010428	#DIV/0!	#DIV/0!	#DIV/0!
1005	HB	MY-mot	MV	202	Medial vestibular nucleus	0.0168174	0.023579	0.0228812	0.0332012	0.0698814	0.0692372	0.0615767	0.0806781	0.0993439	0.102292	0.0913901	0.0987316	0.000768138	0.000750872	0.00111764	0.000933073	0.0143376	0.0124347	0.010261	0.0102988	0.0179623	0.0207556	0.0234114	0.0295391	0.0303482	0.0350149	0.0337491	0.0268774
1006	HB	MY-mot	SPIV	225	Spinal vestibular nucleus	0.0195001	0.025393	0.0235207	0.0255684	0.0676654	0.0505906	0.0535069	0.0833307	0.148033	0.0681525	0.0870453	0.0665204	0.00100783	0.00114178	0.00114851	0.00046724	0.0128946	0.0134348	0.011525	0.0103944	0.0164354	0.0162602	0.0192779	0.0293819	0.0271949	0.0302846	0.0321226	0.0304893
1007	HB	MY-mot	SUV	217	Superior vestibular nucleus	0.00829256	#DIV/0!	0.0254704	0.0324877	0.0614981	#DIV/0!	0.066328	0.0977074	#DIV/0!	#DIV/0!	0.107047	0.0666304	#DIV/0!	#DIV/0!	#DIV/0!	#DIV/0!	#DIV/0!	0.00674698	0.00883206	#DIV/0!	0.0171098	0.01991	#DIV/0!	0.032447	0.0289587	#DIV/0!	#DIV/0!	#DIV/0!
1008	HB	MY-mot	x	765	Nucleus x	#DIV/0!	#DIV/0!	#DIV/0!	#DIV/0!	#DIV/0!	#DIV/0!	#DIV/0!	#DIV/0!	#DIV/0!	#DIV/0!	#DIV/0!	#DIV/0!	#DIV/0!	#DIV/0!	#DIV/0!	#DIV/0!	#DIV/0!	#DIV/0!	#DIV/0!	#DIV/0!	0.015535	#DIV/0!	#DIV/0!	#DIV/0!	#DIV/0!	#DIV/0!	#DIV/0!	#DIV/0!
1009	HB	MY-mot	XII	773	Hypoglossal nucleus	0.0142704	0.00349072	#DIV/0!	0.0221589	#DIV/0!	0.0521494	#DIV/0!	#DIV/0!	#DIV/0!	#DIV/0!	#DIV/0!	#DIV/0!	#DIV/0!	#DIV/0!	#DIV/0!	0.000672063	#DIV/0!	#DIV/0!	#DIV/0!	#DIV/0!	#DIV/0!	#DIV/0!	#DIV/0!	0.0320471	#DIV/0!	#DIV/0!	#DIV/0!	#DIV/0!
1010	HB	MY-mot	y	781	Nucleus y	#DIV/0!	#DIV/0!	#DIV/0!	#DIV/0!	#DIV/0!	#DIV/0!	#DIV/0!	#DIV/0!	#DIV/0!	#DIV/0!	#DIV/0!	#DIV/0!	#DIV/0!	#DIV/0!	#DIV/0!	#DIV/0!	#DIV/0!	#DIV/0!	#DIV/0!	#DIV/0!	#DIV/0!	#DIV/0!	#DIV/0!	#DIV/0!	#DIV/0!	#DIV/0!	#DIV/0!	#DIV/0!
1011	HB	MY-mot	INV	76	Interstitial nucleus of the vestibular nerve	#DIV/0!	#DIV/0!	#DIV/0!	#DIV/0!	#DIV/0!	#DIV/0!	#DIV/0!	#DIV/0!	#DIV/0!	#DIV/0!	#DIV/0!	#DIV/0!	#DIV/0!	#DIV/0!	#DIV/0!	#DIV/0!	#DIV/0!	#DIV/0!	#DIV/0!	#DIV/0!	#DIV/0!	#DIV/0!	#DIV/0!	#DIV/0!	#DIV/0!	#DIV/0!	#DIV/0!	#DIV/0!
1012	HB	MY-sat	MY-sat	379	Medulla, behavioral state related	#DIV/0!	#DIV/0!	#DIV/0!	#DIV/0!	#DIV/0!	#DIV/0!	#DIV/0!	#DIV/0!	#DIV/0!	#DIV/0!	#DIV/0!	#DIV/0!	#DIV/0!	#DIV/0!	#DIV/0!	#DIV/0!	#DIV/0!	#DIV/0!	#DIV/0!	#DIV/0!	#DIV/0!	#DIV/0!	#DIV/0!	#DIV/0!	#DIV/0!	#DIV/0!	#DIV/0!	#DIV/0!
1013	HB	MY-sat	RM	206	Nucleus raphe magnus	#DIV/0!	#DIV/0!	#DIV/0!	#DIV/0!	#DIV/0!	#DIV/0!	#DIV/0!	#DIV/0!	#DIV/0!	#DIV/0!	#DIV/0!	#DIV/0!	#DIV/0!	#DIV/0!	#DIV/0!	#DIV/0!	#DIV/0!	#DIV/0!	#DIV/0!	#DIV/0!	#DIV/0!	#DIV/0!	#DIV/0!	#DIV/0!	#DIV/0!	#DIV/0!	#DIV/0!	#DIV/0!
1014	HB	MY-sat	RPA	230	Nucleus raphe pallidus	#DIV/0!	#DIV/0!	#DIV/0!	#DIV/0!	#DIV/0!	#DIV/0!	#DIV/0!	#DIV/0!	#DIV/0!	#DIV/0!	#DIV/0!	#DIV/0!	#DIV/0!	#DIV/0!	#DIV/0!	#DIV/0!	#DIV/0!	#DIV/0!	#DIV/0!	#DIV/0!	#DIV/0!	#DIV/0!	#DIV/0!	#DIV/0!	#DIV/0!	#DIV/0!	#DIV/0!	#DIV/0!
1015	HB	MY-sat	RO	222	Nucleus raphe obscurus	#DIV/0!	#DIV/0!	#DIV/0!	#DIV/0!	#DIV/0!	#DIV/0!	#DIV/0!	#DIV/0!	#DIV/0!	#DIV/0!	#DIV/0!	#DIV/0!	#DIV/0!	#DIV/0!	#DIV/0!	#DIV/0!	#DIV/0!	#DIV/0!	#DIV/0!	#DIV/0!	#DIV/0!	#DIV/0!	#DIV/0!	#DIV/0!	#DIV/0!	#DIV/0!	#DIV/0!	#DIV/0!
1016	CB	CB	CB	512	Cerebellum	0.0196934	0.0214881	0.0124593	0.0304965	0.0393124	0.0318682	0.0336532	0.0615041	0.0625103	0.0665727	0.0448156	0.0582412	0.00146492	0.00190705	0.00442124	0.000813194	0.00723712	0.00623036	0.00544357	0.01364	0.0103806	0.0117858	0.00746606	0.0126704	0.0125095	0.0234858	0.010987	0.0172335
1017	CB	CBX	CBX	528	Cerebellar cortex	#DIV/0!	#DIV/0!	#DIV/0!	#DIV/0!	#DIV/0!	#DIV/0!	#DIV/0!	#DIV/0!	#DIV/0!	#DIV/0!	#DIV/0!	#DIV/0!	#DIV/0!	#DIV/0!	#DIV/0!	#DIV/0!	#DIV/0!	#DIV/0!	#DIV/0!	#DIV/0!	#DIV/0!	#DIV/0!	#DIV/0!	#DIV/0!	#DIV/0!	#DIV/0!	#DIV/0!	#DIV/0!
1018	CB	CBX	CBXmo	1144	Cerebellar cortex, molecular layer	#DIV/0!	#DIV/0!	#DIV/0!	#DIV/0!	#DIV/0!	#DIV/0!	#DIV/0!	#DIV/0!	#DIV/0!	#DIV/0!	#DIV/0!	#DIV/0!	#DIV/0!	#DIV/0!	#DIV/0!	#DIV/0!	#DIV/0!	#DIV/0!	#DIV/0!	#DIV/0!	#DIV/0!	#DIV/0!	#DIV/0!	#DIV/0!	#DIV/0!	#DIV/0!	#DIV/0!	#DIV/0!
1019	CB	CBX	CBXpu	1145	Cerebellar cortex, Purkinje layer	#DIV/0!	#DIV/0!	#DIV/0!	#DIV/0!	#DIV/0!	#DIV/0!	#DIV/0!	#DIV/0!	#DIV/0!	#DIV/0!	#DIV/0!	#DIV/0!	#DIV/0!	#DIV/0!	#DIV/0!	#DIV/0!	#DIV/0!	#DIV/0!	#DIV/0!	#DIV/0!	#DIV/0!	#DIV/0!	#DIV/0!	#DIV/0!	#DIV/0!	#DIV/0!	#DIV/0!	#DIV/0!
1020	CB	CBX	CBXgr	1143	Cerebellar cortex, granular layer	#DIV/0!	#DIV/0!	#DIV/0!	#DIV/0!	#DIV/0!	#DIV/0!	#DIV/0!	#DIV/0!	#DIV/0!	#DIV/0!	#DIV/0!	#DIV/0!	#DIV/0!	#DIV/0!	#DIV/0!	#DIV/0!	#DIV/0!	#DIV/0!	#DIV/0!	#DIV/0!	#DIV/0!	#DIV/0!	#DIV/0!	#DIV/0!	#DIV/0!	#DIV/0!	#DIV/0!	#DIV/0!
1021	CB	CBX	VERM	645	Vermal regions	#DIV/0!	#DIV/0!	#DIV/0!	#DIV/0!	#DIV/0!	#DIV/0!	#DIV/0!	#DIV/0!	#DIV/0!	#DIV/0!	#DIV/0!	#DIV/0!	#DIV/0!	#DIV/0!	#DIV/0!	#DIV/0!	#DIV/0!	#DIV/0!	#DIV/0!	#DIV/0!	#DIV/0!	#DIV/0!	#DIV/0!	#DIV/0!	#DIV/0!	#DIV/0!	#DIV/0!	#DIV/0!
1022	CB	CBX	LING	912	Lingula (I)	0.0221224	0.0156823	0.0251254	0.0418539	#DIV/0!	0.0689842	0.151144	0.0684647	0.11255	0.0787567	0.0905588	0.0250594	#DIV/0!	0.00269799	#DIV/0!	0.00152015	0.0031879	0.018001	0.00485701	0.0172181	#DIV/0!	#DIV/0!	0.0235265	0.0211453	0.0230287	0.0402543	0.0338992	0.0131656
1023	CB	CBX	LINGmo	10707	Lingula (I), molecular layer	#DIV/0!	#DIV/0!	#DIV/0!	#DIV/0!	#DIV/0!	#DIV/0!	#DIV/0!	#DIV/0!	#DIV/0!	#DIV/0!	#DIV/0!	#DIV/0!	#DIV/0!	#DIV/0!	#DIV/0!	#DIV/0!	#DIV/0!	#DIV/0!	#DIV/0!	#DIV/0!	#DIV/0!	#DIV/0!	#DIV/0!	#DIV/0!	#DIV/0!	#DIV/0!	#DIV/0!	#DIV/0!
1024	CB	CBX	LINGpu	10706	Lingula (I), Purkinje layer	#DIV/0!	#DIV/0!	#DIV/0!	#DIV/0!	#DIV/0!	#DIV/0!	#DIV/0!	#DIV/0!	#DIV/0!	#DIV/0!	#DIV/0!	#DIV/0!	#DIV/0!	#DIV/0!	#DIV/0!	#DIV/0!	#DIV/0!	#DIV/0!	#DIV/0!	#DIV/0!	#DIV/0!	#DIV/0!	#DIV/0!	#DIV/0!	#DIV/0!	#DIV/0!	#DIV/0!	#DIV/0!
1025	CB	CBX	LINGgr	10705	Lingula (I), granular layer	#DIV/0!	#DIV/0!	#DIV/0!	#DIV/0!	#DIV/0!	#DIV/0!	#DIV/0!	#DIV/0!	#DIV/0!	#DIV/0!	#DIV/0!	#DIV/0!	#DIV/0!	#DIV/0!	#DIV/0!	#DIV/0!	#DIV/0!	#DIV/0!	#DIV/0!	#DIV/0!	#DIV/0!	#DIV/0!	#DIV/0!	#DIV/0!	#DIV/0!	#DIV/0!	#DIV/0!	#DIV/0!
1026	CB	CBX	CENT	920	Central lobule	#DIV/0!	#DIV/0!	#DIV/0!	#DIV/0!	#DIV/0!	#DIV/0!	#DIV/0!	#DIV/0!	#DIV/0!	#DIV/0!	#DIV/0!	#DIV/0!	#DIV/0!	#DIV/0!	#DIV/0!	#DIV/0!	#DIV/0!	#DIV/0!	#DIV/0!	#DIV/0!	#DIV/0!	#DIV/0!	#DIV/0!	#DIV/0!	#DIV/0!	#DIV/0!	#DIV/0!	#DIV/0!
1027	CB	CBX	CENT2	976	Lobule II	0.0162502	0.0266729	0.0199691	0.0272117	0.0593769	0.051183	0.0672257	0.0659176	0.105651	0.114814	0.107487	0.116279	0.00102964	0.000405452	0.00381398	0.000566325	0.0212822	0.0108562	0.0121988	0.0120043	0.00474203	0.0170647	0.010469	0.0285364	0.0184046	0.0330661	0.0248105	0.0263731
1028	CB	CBX	CENT2mo	10710	Lobule II, molecular layer	#DIV/0!	#DIV/0!	#DIV/0!	#DIV/0!	#DIV/0!	#DIV/0!	#DIV/0!	#DIV/0!	#DIV/0!	#DIV/0!	#DIV/0!	#DIV/0!	#DIV/0!	#DIV/0!	#DIV/0!	#DIV/0!	#DIV/0!	#DIV/0!	#DIV/0!	#DIV/0!	#DIV/0!	#DIV/0!	#DIV/0!	#DIV/0!	#DIV/0!	#DIV/0!	#DIV/0!	#DIV/0!
1029	CB	CBX	CENT2pu	10709	Lobule II, Purkinje layer	#DIV/0!	#DIV/0!	#DIV/0!	#DIV/0!	#DIV/0!	#DIV/0!	#DIV/0!	#DIV/0!	#DIV/0!	#DIV/0!	#DIV/0!	#DIV/0!	#DIV/0!	#DIV/0!	#DIV/0!	#DIV/0!	#DIV/0!	#DIV/0!	#DIV/0!	#DIV/0!	#DIV/0!	#DIV/0!	#DIV/0!	#DIV/0!	#DIV/0!	#DIV/0!	#DIV/0!	#DIV/0!
1030	CB	CBX	CENT2gr	10708	Lobule II, granular layer	#DIV/0!	#DIV/0!	#DIV/0!	#DIV/0!	#DIV/0!	#DIV/0!	#DIV/0!	#DIV/0!	#DIV/0!	#DIV/0!	#DIV/0!	#DIV/0!	#DIV/0!	#DIV/0!	#DIV/0!	#DIV/0!	#DIV/0!	#DIV/0!	#DIV/0!	#DIV/0!	#DIV/0!	#DIV/0!	#DIV/0!	#DIV/0!	#DIV/0!	#DIV/0!	#DIV/0!	#DIV/0!
1031	CB	CBX	CENT3	984	Lobule III	0.0138856	0.0244884	0.0158078	0.0238774	0.0561446	0.054055	0.0599786	0.0869068	0.0896607	0.113211	0.109611	0.126009	0.000967562	0.000646719	0.0096792	0.00050568	0.0151054	0.00861942	0.00886365	0.015364	0.0102865	0.0189681	0.0095544	0.0305928	0.0137622	0.0251784	0.0185396	0.0230605
1032	CB	CBX	CENT3mo	10713	Lobule III, molecular layer	#DIV/0!	#DIV/0!	#DIV/0!	#DIV/0!	#DIV/0!	#DIV/0!	#DIV/0!	#DIV/0!	#DIV/0!	#DIV/0!	#DIV/0!	#DIV/0!	#DIV/0!	#DIV/0!	#DIV/0!	#DIV/0!	#DIV/0!	#DIV/0!	#DIV/0!	#DIV/0!	#DIV/0!	#DIV/0!	#DIV/0!	#DIV/0!	#DIV/0!	#DIV/0!	#DIV/0!	#DIV/0!
1033	CB	CBX	CENT3pu	10712	Lobule III, Purkinje layer	#DIV/0!	#DIV/0!	#DIV/0!	#DIV/0!	#DIV/0!	#DIV/0!	#DIV/0!	#DIV/0!	#DIV/0!	#DIV/0!	#DIV/0!	#DIV/0!	#DIV/0!	#DIV/0!	#DIV/0!	#DIV/0!	#DIV/0!	#DIV/0!	#DIV/0!	#DIV/0!	#DIV/0!	#DIV/0!	#DIV/0!	#DIV/0!	#DIV/0!	#DIV/0!	#DIV/0!	#DIV/0!
1034	CB	CBX	CENT3gr	10711	Lobule III, granular layer	#DIV/0!	#DIV/0!	#DIV/0!	#DIV/0!	#DIV/0!	#DIV/0!	#DIV/0!	#DIV/0!	#DIV/0!	#DIV/0!	#DIV/0!	#DIV/0!	#DIV/0!	#DIV/0!	#DIV/0!	#DIV/0!	#DIV/0!	#DIV/0!	#DIV/0!	#DIV/0!	#DIV/0!	#DIV/0!	#DIV/0!	#DIV/0!	#DIV/0!	#DIV/0!	#DIV/0!	#DIV/0!
1035	CB	CBX	CUL	928	Culmen	#DIV/0!	#DIV/0!	#DIV/0!	#DIV/0!	#DIV/0!	#DIV/0!	#DIV/0!	#DIV/0!	#DIV/0!	#DIV/0!	#DIV/0!	#DIV/0!	#DIV/0!	#DIV/0!	#DIV/0!	#DIV/0!	#DIV/0!	#DIV/0!	#DIV/0!	#DIV/0!	#DIV/0!	#DIV/0!	#DIV/0!	#DIV/0!	#DIV/0!	#DIV/0!	#DIV/0!	#DIV/0!
1036	CB	CBX	CUL4	992	Lobule IV	#DIV/0!	#DIV/0!	#DIV/0!	#DIV/0!	#DIV/0!	#DIV/0!	#DIV/0!	#DIV/0!	#DIV/0!	#DIV/0!	#DIV/0!	#DIV/0!	#DIV/0!	#DIV/0!	#DIV/0!	#DIV/0!	#DIV/0!	#DIV/0!	#DIV/0!	#DIV/0!	#DIV/0!	#DIV/0!	#DIV/0!	#DIV/0!	#DIV/0!	#DIV/0!	#DIV/0!	#DIV/0!
1037	CB	CBX	CUL4mo	10716	Lobule IV, molecular layer	#DIV/0!	#DIV/0!	#DIV/0!	#DIV/0!	#DIV/0!	#DIV/0!	#DIV/0!	#DIV/0!	#DIV/0!	#DIV/0!	#DIV/0!	#DIV/0!	#DIV/0!	#DIV/0!	#DIV/0!	#DIV/0!	#DIV/0!	#DIV/0!	#DIV/0!	#DIV/0!	#DIV/0!	#DIV/0!	#DIV/0!	#DIV/0!	#DIV/0!	#DIV/0!	#DIV/0!	#DIV/0!
1038	CB	CBX	CUL4pu	10715	Lobule IV, Purkinje layer	#DIV/0!	#DIV/0!	#DIV/0!	#DIV/0!	#DIV/0!	#DIV/0!	#DIV/0!	#DIV/0!	#DIV/0!	#DIV/0!	#DIV/0!	#DIV/0!	#DIV/0!	#DIV/0!	#DIV/0!	#DIV/0!	#DIV/0!	#DIV/0!	#DIV/0!	#DIV/0!	#DIV/0!	#DIV/0!	#DIV/0!	#DIV/0!	#DIV/0!	#DIV/0!	#DIV/0!	#DIV/0!
1039	CB	CBX	CUL4gr	10714	Lobule IV, granular layer	#DIV/0!	#DIV/0!	#DIV/0!	#DIV/0!	#DIV/0!	#DIV/0!	#DIV/0!	#DIV/0!	#DIV/0!	#DIV/0!	#DIV/0!	#DIV/0!	#DIV/0!	#DIV/0!	#DIV/0!	#DIV/0!	#DIV/0!	#DIV/0!	#DIV/0!	#DIV/0!	#DIV/0!	#DIV/0!	#DIV/0!	#DIV/0!	#DIV/0!	#DIV/0!	#DIV/0!	#DIV/0!
1040	CB	CBX	CUL5	1001	Lobule V	#DIV/0!	#DIV/0!	#DIV/0!	#DIV/0!	#DIV/0!	#DIV/0!	#DIV/0!	#DIV/0!	#DIV/0!	#DIV/0!	#DIV/0!	#DIV/0!	#DIV/0!	#DIV/0!	#DIV/0!	#DIV/0!	#DIV/0!	#DIV/0!	#DIV/0!	#DIV/0!	#DIV/0!	#DIV/0!	#DIV/0!	#DIV/0!	#DIV/0!	#DIV/0!	#DIV/0!	#DIV/0!
1041	CB	CBX	CUL5mo	10719	Lobule V, molecular layer	#DIV/0!	#DIV/0!	#DIV/0!	#DIV/0!	#DIV/0!	#DIV/0!	#DIV/0!	#DIV/0!	#DIV/0!	#DIV/0!	#DIV/0!	#DIV/0!	#DIV/0!	#DIV/0!	#DIV/0!	#DIV/0!	#DIV/0!	#DIV/0!	#DIV/0!	#DIV/0!	#DIV/0!	#DIV/0!	#DIV/0!	#DIV/0!	#DIV/0!	#DIV/0!	#DIV/0!	#DIV/0!
1042	CB	CBX	CUL5pu	10718	Lobule V, Purkinje layer	#DIV/0!	#DIV/0!	#DIV/0!	#DIV/0!	#DIV/0!	#DIV/0!	#DIV/0!	#DIV/0!	#DIV/0!	#DIV/0!	#DIV/0!	#DIV/0!	#DIV/0!	#DIV/0!	#DIV/0!	#DIV/0!	#DIV/0!	#DIV/0!	#DIV/0!	#DIV/0!	#DIV/0!	#DIV/0!	#DIV/0!	#DIV/0!	#DIV/0!	#DIV/0!	#DIV/0!	#DIV/0!
1043	CB	CBX	CUL5gr	10717	Lobule V, granular layer	#DIV/0!	#DIV/0!	#DIV/0!	#DIV/0!	#DIV/0!	#DIV/0!	#DIV/0!	#DIV/0!	#DIV/0!	#DIV/0!	#DIV/0!	#DIV/0!	#DIV/0!	#DIV/0!	#DIV/0!	#DIV/0!	#DIV/0!	#DIV/0!	#DIV/0!	#DIV/0!	#DIV/0!	#DIV/0!	#DIV/0!	#DIV/0!	#DIV/0!	#DIV/0!	#DIV/0!	#DIV/0!
1044	CB	CBX	CUL4	1091	Lobules IV-V	0.00650266	0.0184163	0.0100297	0.0133851	0.0465787	0.0424467	0.0475749	0.0591376	0.089797	0.0921157	0.0978741	0.11295	0.000813107	0.000358824	0.00458838	0.000335598	0.00814315	0.00713425	0.00691256	0.015088	0.00615132	0.00766014	0.0084163	0.0174142	0.0128631	0.018126	0.0120643	0.0149574
1045	CB	CBX	CUL4	10722	Lobules IV-V, molecular layer	#DIV/0!	#DIV/0!	#DIV/0!	#DIV/0!	#DIV/0!	#DIV/0!	#DIV/0!	#DIV/0!	#DIV/0!	#DIV/0!	#DIV/0!	#DIV/0!	#DIV/0!	#DIV/0!	#DIV/0!	#DIV/0!	#DIV/0!	#DIV/0!	#DIV/0!	#DIV/0!	#DIV/0!	#DIV/0!	#DIV/0!	#DIV/0!	#DIV/0!	#DIV/0!	#DIV/0!	#DIV/0!
1046	CB	CBX	CUL4	10721	Lobules IV-V, Purkinje layer	#DIV/0!	#DIV/0!	#DIV/0!	#DIV/0!	#DIV/0!	#DIV/0!	#DIV/0!	#DIV/0!	#DIV/0!	#DIV/0!	#DIV/0!	#DIV/0!	#DIV/0!	#DIV/0!	#DIV/0!	#DIV/0!	#DIV/0!	#DIV/0!	#DIV/0!	#DIV/0!	#DIV/0!	#DIV/0!	#DIV/0!	#DIV/0!	#DIV/0!	#DIV/0!	#DIV/0!	#DIV/0!
1047	CB	CBX	CUL4	10720	Lobules IV-V, granular layer	#DIV/0!	#DIV/0!	#DIV/0!	#DIV/0!	#DIV/0!	#DIV/0!	#DIV/0!	#DIV/0!	#DIV/0!	#DIV/0!	#DIV/0!	#DIV/0!	#DIV/0!	#DIV/0!	#DIV/0!	#DIV/0!	#DIV/0!	#DIV/0!	#DIV/0!	#DIV/0!	#DIV/0!	#DIV/0!	#DIV/0!	#DIV/0!	#DIV/0!	#DIV/0!	#DIV/0!	#DIV/0!
1048	CB	CBX	DEC	936	Declive (VI)	0.00271303	0.0174411	0.00724492	0.00897627	0.0441355	0.0332208	0.0347215	0.0359787	0.0695942	0.0602945	0.0835131	0.096564	0.000607295	0.000242465	0.00150668	0.000187201	0.00558853	0.00710949	0.00543924	0.0147347	0.00558002	0.00393489	0.0097909	0.0116759	0.010858	0.0144647	0.0109393	0.0128325
1049	CB	CBX	DECmo	10725	Declive (VI), molecular layer	#DIV/0!	#DIV/0!	#DIV/0!	#DIV/0!	#DIV/0!	#DIV/0!	#DIV/0!	#DIV/0!	#DIV/0!	#DIV/0!	#DIV/0!	#DIV/0!	#DIV/0!	#DIV/0!	#DIV/0!	#DIV/0!	#DIV/0!	#DIV/0!	#DIV/0!	#DIV/0!	#DIV/0!	#DIV/0!	#DIV/0!	#DIV/0!	#DIV/0!	#DIV/0!	#DIV/0!	#DIV/0!
1050	CB	CBX	DECpu	10724	Declive (VI), Purkinje layer	#DIV/0!	#DIV/0!	#DIV/0!	#DIV/0!	#DIV/0!	#DIV/0!	#DIV/0!	#DIV/0!	#DIV/0!	#DIV/0!	#DIV/0!	#DIV/0!	#DIV/0!	#DIV/0!	#DIV/0!	#DIV/0!	#DIV/0!	#DIV/0!	#DIV/0!	#DIV/0!	#DIV/0!	#DIV/0!	#DIV/0!	#DIV/0!	#DIV/0!	#DIV/0!	#DIV/0!	#DIV/0!
1051	CB	CBX	DECgr	10723	Declive (VI), granular layer	#DIV/0!	#DIV/0!	#DIV/0!	#DIV/0!	#DIV/0!	#DIV/0!	#DIV/0!	#DIV/0!	#DIV/0!	#DIV/0!	#DIV/0!	#DIV/0!	#DIV/0!	#DIV/0!	#DIV/0!	#DIV/0!	#DIV/0!	#DIV/0!	#DIV/0!	#DIV/0!	#DIV/0!	#DIV/0!	#DIV/0!	#DIV/0!	#DIV/0!	#DIV/0!	#DIV/0!	#DIV/0!
1052	CB	CBX	FOTU	944	Folium-tuber vermis (VII)	0.0034129	0.0129281	0.00513787	0.00948922	0.0397976	0.0195519	0.0414164	0.0261004	0.0746597	0.0384756	0.0801827	0.0888956	0.000310002	0.000297915	0.000211606	0.000134047	0.00372502	0.00458664	0.0025682	0.0141067	0.00443631	0.00243366	0.0107417	0.00701484	0.00747279	0.0133046	0.00906987	0.00902016
1053	CB	CBX	FOTUmo	10728	Folium-tuber vermis (VII), molecular layer	#DIV/0!	#DIV/0!	#DIV/0!	#DIV/0!	#DIV/0!	#DIV/0!	#DIV/0!	#DIV/0!	#DIV/0!	#DIV/0!	#DIV/0!	#DIV/0!	#DIV/0!	#DIV/0!	#DIV/0!	#DIV/0!	#DIV/0!	#DIV/0!	#DIV/0!	#DIV/0!	#DIV/0!	#DIV/0!	#DIV/0!	#DIV/0!	#DIV/0!	#DIV/0!	#DIV/0!	#DIV/0!
1054	CB	CBX	FOTUpu	10727	Folium-tuber vermis (VII), Purkinje layer	#DIV/0!	#DIV/0!	#DIV/0!	#DIV/0!	#DIV/0!	#DIV/0!	#DIV/0!	#DIV/0!	#DIV/0!	#DIV/0!	#DIV/0!	#DIV/0!	#DIV/0!	#DIV/0!	#DIV/0!	#DIV/0!	#DIV/0!	#DIV/0!	#DIV/0!	#DIV/0!	#DIV/0!	#DIV/0!	#DIV/0!	#DIV/0!	#DIV/0!	#DIV/0!	#DIV/0!	#DIV/0!
1055	CB	CBX	FOTUgr	10726	Folium-tuber vermis (VII), granular layer	#DIV/0!	#DIV/0!	#DIV/0!	#DIV/0!	#DIV/0!	#DIV/0!	#DIV/0!	#DIV/0!	#DIV/0!	#DIV/0!	#DIV/0!	#DIV/0!	#DIV/0!	#DIV/0!	#DIV/0!	#DIV/0!	#DIV/0!	#DIV/0!	#DIV/0!	#DIV/0!	#DIV/0!	#DIV/0!	#DIV/0!	#DIV/0!	#DIV/0!	#DIV/0!	#DIV/0!	#DIV/0!
1056	CB	CBX	PYR	951	Pyramus (VIII)	0.00218282	0.0125505	0.00626766	0.00966005	0.036161	0.0181241	0.0368218	0.0403345	0.0755486	0.0524332	0.0714242	0.101033	0.000366764	0.000155569	0.00121333	0.000425017	0.00392424	0.0047131	0.00205518	0.00757068	0.0018517	0.00401604	0.00465399	0.0059995	0.00748756	0.0134394	0.0065568	0.00627844
1057	CB	CBX	PYRmo	10731	Pyramus (VIII), molecular layer	#DIV/0!	#DIV/0!	#DIV/0!	#DIV/0!	#DIV/0!	#DIV/0!	#DIV/0!	#DIV/0!	#DIV/0!	#DIV/0!	#DIV/0!	#DIV/0!	#DIV/0!	#DIV/0!	#DIV/0!	#DIV/0!	#DIV/0!	#DIV/0!	#DIV/0!	#DIV/0!	#DIV/0!	#DIV/0!	#DIV/0!	#DIV/0!	#DIV/0!	#DIV/0!	#DIV/0!	#DIV/0!
1058	CB	CBX	PYRpu	10730	Pyramus (VIII), Purkinje layer	#DIV/0!	#DIV/0!	#DIV/0!	#DIV/0!	#DIV/0!	#DIV/0!	#DIV/0!	#DIV/0!	#DIV/0!	#DIV/0!	#DIV/0!	#DIV/0!	#DIV/0!	#DIV/0!	#DIV/0!	#DIV/0!	#DIV/0!	#DIV/0!	#DIV/0!	#DIV/0!	#DIV/0!	#DIV/0!	#DIV/0!	#DIV/0!	#DIV/0!	#DIV/0!	#DIV/0!	#DIV/0!
1059	CB	CBX	PYRgr	10729	Pyramus (VIII), granular layer	#DIV/0!	#DIV/0!	#DIV/0!	#DIV/0!	#DIV/0!	#DIV/0!	#DIV/0!	#DIV/0!	#DIV/0!	#DIV/0!	#DIV/0!	#DIV/0!	#DIV/0!	#DIV/0!	#DIV/0!	#DIV/0!	#DIV/0!	#DIV/0!	#DIV/0!	#DIV/0!	#DIV/0!	#DIV/0!	#DIV/0!	#DIV/0!	#DIV/0!	#DIV/0!	#DIV/0!	#DIV/0!
1060	CB	CBX	UVU	957	Uvula (IX)	0.00638482	0.0161706	0.0125041	0.0130105	0.0355678	0.0264293	0.0344836	0.0639672	0.0775763	0.0696124	0.07648	0.114592	0.000102499	0.000117157	0.000603718	0.000151559	0.00417219	0.00382201	0.00253921	0.00501693	0.00391733	0.0054549	0.00407633	0.00610035	0.00760642	0.0125085	0.0100756	0.00841029
1061	CB	CBX	UVUmo	10734	Uvula (IX), molecular layer	#DIV/0!	#DIV/0!	#DIV/0!	#DIV/0!	#DIV/0!	#DIV/0!	#DIV/0!	#DIV/0!	#DIV/0!	#DIV/0!	#DIV/0!	#DIV/0!	#DIV/0!	#DIV/0!	#DIV/0!	#DIV/0!	#DIV/0!	#DIV/0!	#DIV/0!	#DIV/0!	#DIV/0!	#DIV/0!	#DIV/0!	#DIV/0!	#DIV/0!	#DIV/0!	#DIV/0!	#DIV/0!
1062	CB	CBX	UVUpu	10733	Uvula (IX), Purkinje layer	#DIV/0!	#DIV/0!	#DIV/0!	#DIV/0!	#DIV/0!	#DIV/0!	#DIV/0!	#DIV/0!	#DIV/0!	#DIV/0!	#DIV/0!	#DIV/0!	#DIV/0!	#DIV/0!	#DIV/0!	#DIV/0!	#DIV/0!	#DIV/0!	#DIV/0!	#DIV/0!	#DIV/0!	#DIV/0!	#DIV/0!	#DIV/0!	#DIV/0!	#DIV/0!	#DIV/0!	#DIV/0!
1063	CB	CBX	UVUgr	10732	Uvula (IX), granular layer	#DIV/0!	#DIV/0!	#DIV/0!	#DIV/0!	#DIV/0!	#DIV/0!	#DIV/0!	#DIV/0!	#DIV/0!	#DIV/0!	#DIV/0!	#DIV/0!	#DIV/0!	#DIV/0!	#DIV/0!	#DIV/0!	#DIV/0!	#DIV/0!	#DIV/0!	#DIV/0!	#DIV/0!	#DIV/0!	#DIV/0!	#DIV/0!	#DIV/0!	#DIV/0!	#DIV/0!	#DIV/0!
1064	CB	CBX	NOD	968	Nodulus (X)	0.012446	0.0166603	0.015904	0.0171955	0.0452892	0.037187	0.0432441	0.0757265	0.0793427	0.0883787	0.0819235	0.0852047	0.000301596	0.000233891	0.000633954	0.000238631	0.00564541	0.00684668	0.00547887	0.0106476	0.00419585	0.00812741	0.00479109	0.0118925	0.0113134	0.0135858	0.0134907	0.00768171
1065	CB	CBX	NODmo	10737	Nodulus (X), molecular layer	#DIV/0!	#DIV/0!	#DIV/0!	#DIV/0!	#DIV/0!	#DIV/0!	#DIV/0!	#DIV/0!	#DIV/0!	#DIV/0!	#DIV/0!	#DIV/0!	#DIV/0!	#DIV/0!	#DIV/0!	#DIV/0!	#DIV/0!	#DIV/0!	#DIV/0!	#DIV/0!	#DIV/0!	#DIV/0!	#DIV/0!	#DIV/0!	#DIV/0!	#DIV/0!	#DIV/0!	#DIV/0!
1066	CB	CBX	NODpu	10736	Nodulus (X), Purkinje layer	#DIV/0!	#DIV/0!	#DIV/0!	#DIV/0!	#DIV/0!	#DIV/0!	#DIV/0!	#DIV/0!	#DIV/0!	#DIV/0!	#DIV/0!	#DIV/0!	#DIV/0!	#DIV/0!	#DIV/0!	#DIV/0!	#DIV/0!	#DIV/0!	#DIV/0!	#DIV/0!	#DIV/0!	#DIV/0!	#DIV/0!	#DIV/0!	#DIV/0!	#DIV/0!	#DIV/0!	#DIV/0!
1067	CB	CBX	NODgr	10735	Nodulus (X), granular layer	#DIV/0!	#DIV/0!	#DIV/0!	#DIV/0!	#DIV/0!	#DIV/0!	#DIV/0!	#DIV/0!	#DIV/0!	#DIV/0!	#DIV/0!	#DIV/0!	#DIV/0!	#DIV/0!	#DIV/0!	#DIV/0!	#DIV/0!	#DIV/0!	#DIV/0!	#DIV/0!	#DIV/0!	#DIV/0!	#DIV/0!	#DIV/0!	#DIV/0!	#DIV/0!	#DIV/0!	#DIV/0!
1068	CB	CBX	HEM	1073	Hemispheric regions	#DIV/0!	#DIV/0!	#DIV/0!	#DIV/0!	#DIV/0!	#DIV/0!	#DIV/0!	#DIV/0!	#DIV/0!	#DIV/0!	#DIV/0!	#DIV/0!	#DIV/0!	#DIV/0!	#DIV/0!	#DIV/0!	#DIV/0!	#DIV/0!	#DIV/0!	#DIV/0!	#DIV/0!	#DIV/0!	#DIV/0!	#DIV/0!	#DIV/0!	#DIV/0!	#DIV/0!	#DIV/0!
1069	CB	CBX	SIM	1007	Simple lobule	#DIV/0!	#DIV/0!	#DIV/0!	#DIV/0!	#DIV/0!	#DIV/0!	0.0333216	#DIV/0!	#DIV/0!	#DIV/0!	#DIV/0!	#DIV/0!	#DIV/0!	#DIV/0!	#DIV/0!	#DIV/0!	#DIV/0!	#DIV/0!	#DIV/0!	#DIV/0!	0.00678565	0.00475407	#DIV/0!	#DIV/0!	#DIV/0!	#DIV/0!	#DIV/0!	#DIV/0!
1070	CB	CBX	SIMmo	10674	Simple lobule, molecular layer	#DIV/0!	#DIV/0!	#DIV/0!	#DIV/0!	#DIV/0!	#DIV/0!	#DIV/0!	#DIV/0!	#DIV/0!	#DIV/0!	#DIV/0!	#DIV/0!	#DIV/0!	#DIV/0!	#DIV/0!	#DIV/0!	#DIV/0!	#DIV/0!	#DIV/0!	#DIV/0!	#DIV/0!	#DIV/0!	#DIV/0!	#DIV/0!	#DIV/0!	#DIV/0!	#DIV/0!	#DIV/0!
1071	CB	CBX	SIMpu	10673	Simple lobule, Purkinje layer	#DIV/0!	#DIV/0!	#DIV/0!	#DIV/0!	#DIV/0!	#DIV/0!	#DIV/0!	#DIV/0!	#DIV/0!	#DIV/0!	#DIV/0!	#DIV/0!	#DIV/0!	#DIV/0!	#DIV/0!	#DIV/0!	#DIV/0!	#DIV/0!	#DIV/0!	#DIV/0!	#DIV/0!	#DIV/0!	#DIV/0!	#DIV/0!	#DIV/0!	#DIV/0!	#DIV/0!	#DIV/0!
1072	CB	CBX	SIMgr	10672	Simple lobule, granular layer	#DIV/0!	#DIV/0!	#DIV/0!	#DIV/0!	#DIV/0!	#DIV/0!	#DIV/0!	#DIV/0!	#DIV/0!	#DIV/0!	#DIV/0!	#DIV/0!	#DIV/0!	#DIV/0!	#DIV/0!	#DIV/0!	#DIV/0!	#DIV/0!	#DIV/0!	#DIV/0!	#DIV/0!	#DIV/0!	#DIV/0!	#DIV/0!	#DIV/0!	#DIV/0!	#DIV/0!	#DIV/0!
1073	CB	CBX	AN	1017	Ansiform lobule	#DIV/0!	#DIV/0!	#DIV/0!	#DIV/0!	#DIV/0!	#DIV/0!	#DIV/0!	#DIV/0!	#DIV/0!	#DIV/0!	#DIV/0!	#DIV/0!	#DIV/0!	#DIV/0!	#DIV/0!	#DIV/0!	#DIV/0!	#DIV/0!	#DIV/0!	#DIV/0!	#DIV/0!	#DIV/0!	#DIV/0!	#DIV/0!	#DIV/0!	#DIV/0!	#DIV/0!	#DIV/0!
1074	CB	CBX	ANcr1	1056	Crus 1	#DIV/0!	#DIV/0!	#DIV/0!	#DIV/0!	0.00607397	#DIV/0!	0.0247071	#DIV/0!	#DIV/0!	#DIV/0!	#DIV/0!	#DIV/0!	#DIV/0!	#DIV/0!	#DIV/0!	#DIV/0!	#DIV/0!	#DIV/0!	#DIV/0!	#DIV/0!	0.00786534	0.00371491	#DIV/0!	#DIV/0!	0.0515552	#DIV/0!	#DIV/0!	#DIV/0!
1075	CB	CBX	ANcr1mo	10677	Crus 1, molecular layer	#DIV/0!	#DIV/0!	#DIV/0!	#DIV/0!	#DIV/0!	#DIV/0!	#DIV/0!	#DIV/0!	#DIV/0!	#DIV/0!	#DIV/0!	#DIV/0!	#DIV/0!	#DIV/0!	#DIV/0!	#DIV/0!	#DIV/0!	#DIV/0!	#DIV/0!	#DIV/0!	#DIV/0!	#DIV/0!	#DIV/0!	#DIV/0!	#DIV/0!	#DIV/0!	#DIV/0!	#DIV/0!
1076	CB	CBX	ANcr1pu	10676	Crus 1, Purkinje layer	#DIV/0!	#DIV/0!	#DIV/0!	#DIV/0!	#DIV/0!	#DIV/0!	#DIV/0!	#DIV/0!	#DIV/0!	#DIV/0!	#DIV/0!	#DIV/0!	#DIV/0!	#DIV/0!	#DIV/0!	#DIV/0!	#DIV/0!	#DIV/0!	#DIV/0!	#DIV/0!	#DIV/0!	#DIV/0!	#DIV/0!	#DIV/0!	#DIV/0!	#DIV/0!	#DIV/0!	#DIV/0!
1077	CB	CBX	ANcr1gr	10675	Crus 1, granular layer	#DIV/0!	#DIV/0!	#DIV/0!	#DIV/0!	#DIV/0!	#DIV/0!	#DIV/0!	#DIV/0!	#DIV/0!	#DIV/0!	#DIV/0!	#DIV/0!	#DIV/0!	#DIV/0!	#DIV/0!	#DIV/0!	#DIV/0!	#DIV/0!	#DIV/0!	#DIV/0!	#DIV/0!	#DIV/0!	#DIV/0!	#DIV/0!	#DIV/0!	#DIV/0!	#DIV/0!	#DIV/0!
1078	CB	CBX	ANcr2	1064	Crus 2	#DIV/0!	#DIV/0!	#DIV/0!	#DIV/0!	0.028436	#DIV/0!	0.0180612	#DIV/0!	#DIV/0!	#DIV/0!	#DIV/0!	#DIV/0!	#DIV/0!	#DIV/0!	#DIV/0!	#DIV/0!	#DIV/0!	#DIV/0!	#DIV/0!	#DIV/0!	0.00759468	0.0053453	#DIV/0!	#DIV/0!	#DIV/0!	#DIV/0!	#DIV/0!	#DIV/0!
1079	CB	CBX	ANcr2mo	10680	Crus 2, molecular layer	#DIV/0!	#DIV/0!	#DIV/0!	#DIV/0!	#DIV/0!	#DIV/0!	#DIV/0!	#DIV/0!	#DIV/0!	#DIV/0!	#DIV/0!	#DIV/0!	#DIV/0!	#DIV/0!	#DIV/0!	#DIV/0!	#DIV/0!	#DIV/0!	#DIV/0!	#DIV/0!	#DIV/0!	#DIV/0!	#DIV/0!	#DIV/0!	#DIV/0!	#DIV/0!	#DIV/0!	#DIV/0!
1080	CB	CBX	ANcr2pu	10679	Crus 2, Purkinje layer	#DIV/0!	#DIV/0!	#DIV/0!	#DIV/0!	#DIV/0!	#DIV/0!	#DIV/0!	#DIV/0!	#DIV/0!	#DIV/0!	#DIV/0!	#DIV/0!	#DIV/0!	#DIV/0!	#DIV/0!	#DIV/0!	#DIV/0!	#DIV/0!	#DIV/0!	#DIV/0!	#DIV/0!	#DIV/0!	#DIV/0!	#DIV/0!	#DIV/0!	#DIV/0!	#DIV/0!	#DIV/0!
1081	CB	CBX	ANcr2gr	10678	Crus 2, granular layer	#DIV/0!	#DIV/0!	#DIV/0!	#DIV/0!	#DIV/0!	#DIV/0!	#DIV/0!	#DIV/0!	#DIV/0!	#DIV/0!	#DIV/0!	#DIV/0!	#DIV/0!	#DIV/0!	#DIV/0!	#DIV/0!	#DIV/0!	#DIV/0!	#DIV/0!	#DIV/0!	#DIV/0!	#DIV/0!	#DIV/0!	#DIV/0!	#DIV/0!	#DIV/0!	#DIV/0!	#DIV/0!
1082	CB	CBX	PRM	1025	Paramedian lobule	0.000400531	#DIV/0!	#DIV/0!	#DIV/0!	0.0402769	#DIV/0!	0.0184067	#DIV/0!	#DIV/0!	#DIV/0!	0.0406661	0.0502089	#DIV/0!	#DIV/0!	#DIV/0!	#DIV/0!	#DIV/0!	0.00171897	#DIV/0!	#DIV/0!	0.00444958	0.00556787	#DIV/0!	0.00915156	0.00838142	#DIV/0!	#DIV/0!	#DIV/0!
1083	CB	CBX	PRMmo	10683	Paramedian lobule, molecular layer	#DIV/0!	#DIV/0!	#DIV/0!	#DIV/0!	#DIV/0!	#DIV/0!	#DIV/0!	#DIV/0!	#DIV/0!	#DIV/0!	#DIV/0!	#DIV/0!	#DIV/0!	#DIV/0!	#DIV/0!	#DIV/0!	#DIV/0!	#DIV/0!	#DIV/0!	#DIV/0!	#DIV/0!	#DIV/0!	#DIV/0!	#DIV/0!	#DIV/0!	#DIV/0!	#DIV/0!	#DIV/0!
1084	CB	CBX	PRMpu	10682	Paramedian lobule, Purkinje layer	#DIV/0!	#DIV/0!	#DIV/0!	#DIV/0!	#DIV/0!	#DIV/0!	#DIV/0!	#DIV/0!	#DIV/0!	#DIV/0!	#DIV/0!	#DIV/0!	#DIV/0!	#DIV/0!	#DIV/0!	#DIV/0!	#DIV/0!	#DIV/0!	#DIV/0!	#DIV/0!	#DIV/0!	#DIV/0!	#DIV/0!	#DIV/0!	#DIV/0!	#DIV/0!	#DIV/0!	#DIV/0!
1085	CB	CBX	PRMgr	10681	Paramedian lobule, granular layer	#DIV/0!	#DIV/0!	#DIV/0!	#DIV/0!	#DIV/0!	#DIV/0!	#DIV/0!	#DIV/0!	#DIV/0!	#DIV/0!	#DIV/0!	#DIV/0!	#DIV/0!	#DIV/0!	#DIV/0!	#DIV/0!	#DIV/0!	#DIV/0!	#DIV/0!	#DIV/0!	#DIV/0!	#DIV/0!	#DIV/0!	#DIV/0!	#DIV/0!	#DIV/0!	#DIV/0!	#DIV/0!
1086	CB	CBX	COPY	1033	Copula pyramidis	0.00567117	0.00467281	0.00701541	0.0105509	0.0380952	#DIV/0!	0.0284055	0.036474	#DIV/0!	#DIV/0!	0.0824628	0.130641	#DIV/0!	0.000325401	6.74819e-05	#DIV/0!	0.00344626	0.0016736	0.000318556	#DIV/0!	0.0046624	0.00631834	#DIV/0!	0.00730837	0.00685169	0.00422732	#DIV/0!	0.00250092
1087	CB	CBX	COPYmo	10686	Copula pyramidis, molecular layer	#DIV/0!	#DIV/0!	#DIV/0!	#DIV/0!	#DIV/0!	#DIV/0!	#DIV/0!	#DIV/0!	#DIV/0!	#DIV/0!	#DIV/0!	#DIV/0!	#DIV/0!	#DIV/0!	#DIV/0!	#DIV/0!	#DIV/0!	#DIV/0!	#DIV/0!	#DIV/0!	#DIV/0!	#DIV/0!	#DIV/0!	#DIV/0!	#DIV/0!	#DIV/0!	#DIV/0!	#DIV/0!
1088	CB	CBX	COPYpu	10685	Copula pyramidis, Purkinje layer	#DIV/0!	#DIV/0!	#DIV/0!	#DIV/0!	#DIV/0!	#DIV/0!	#DIV/0!	#DIV/0!	#DIV/0!	#DIV/0!	#DIV/0!	#DIV/0!	#DIV/0!	#DIV/0!	#DIV/0!	#DIV/0!	#DIV/0!	#DIV/0!	#DIV/0!	#DIV/0!	#DIV/0!	#DIV/0!	#DIV/0!	#DIV/0!	#DIV/0!	#DIV/0!	#DIV/0!	#DIV/0!
1089	CB	CBX	COPYgr	10684	Copula pyramidis, granular layer	#DIV/0!	#DIV/0!	#DIV/0!	#DIV/0!	#DIV/0!	#DIV/0!	#DIV/0!	#DIV/0!	#DIV/0!	#DIV/0!	#DIV/0!	#DIV/0!	#DIV/0!	#DIV/0!	#DIV/0!	#DIV/0!	#DIV/0!	#DIV/0!	#DIV/0!	#DIV/0!	#DIV/0!	#DIV/0!	#DIV/0!	#DIV/0!	#DIV/0!	#DIV/0!	#DIV/0!	#DIV/0!
1090	CB	CBX	PFL	1041	Paraflocculus	#DIV/0!	#DIV/0!	#DIV/0!	#DIV/0!	#DIV/0!	#DIV/0!	#DIV/0!	#DIV/0!	#DIV/0!	#DIV/0!	#DIV/0!	#DIV/0!	#DIV/0!	#DIV/0!	#DIV/0!	#DIV/0!	#DIV/0!	#DIV/0!	#DIV/0!	#DIV/0!	#DIV/0!	#DIV/0!	#DIV/0!	#DIV/0!	#DIV/0!	#DIV/0!	#DIV/0!	#DIV/0!
1091	CB	CBX	PFLmo	10689	Paraflocculus, molecular layer	#DIV/0!	#DIV/0!	#DIV/0!	#DIV/0!	#DIV/0!	#DIV/0!	#DIV/0!	#DIV/0!	#DIV/0!	#DIV/0!	#DIV/0!	#DIV/0!	#DIV/0!	#DIV/0!	#DIV/0!	#DIV/0!	#DIV/0!	#DIV/0!	#DIV/0!	#DIV/0!	#DIV/0!	#DIV/0!	#DIV/0!	#DIV/0!	#DIV/0!	#DIV/0!	#DIV/0!	#DIV/0!
1092	CB	CBX	PFLpu	10688	Paraflocculus, Purkinje layer	#DIV/0!	#DIV/0!	#DIV/0!	#DIV/0!	#DIV/0!	#DIV/0!	#DIV/0!	#DIV/0!	#DIV/0!	#DIV/0!	#DIV/0!	#DIV/0!	#DIV/0!	#DIV/0!	#DIV/0!	#DIV/0!	#DIV/0!	#DIV/0!	#DIV/0!	#DIV/0!	#DIV/0!	#DIV/0!	#DIV/0!	#DIV/0!	#DIV/0!	#DIV/0!	#DIV/0!	#DIV/0!
1093	CB	CBX	PFLgr	10687	Paraflocculus, granular layer	#DIV/0!	#DIV/0!	#DIV/0!	#DIV/0!	#DIV/0!	#DIV/0!	#DIV/0!	#DIV/0!	#DIV/0!	#DIV/0!	#DIV/0!	#DIV/0!	#DIV/0!	#DIV/0!	#DIV/0!	#DIV/0!	#DIV/0!	#DIV/0!	#DIV/0!	#DIV/0!	#DIV/0!	#DIV/0!	#DIV/0!	#DIV/0!	#DIV/0!	#DIV/0!	#DIV/0!	#DIV/0!
1094	CB	CBX	FL	1049	Flocculus	#DIV/0!	#DIV/0!	#DIV/0!	#DIV/0!	#DIV/0!	#DIV/0!	#DIV/0!	#DIV/0!	#DIV/0!	#DIV/0!	#DIV/0!	#DIV/0!	#DIV/0!	#DIV/0!	#DIV/0!	#DIV/0!	#DIV/0!	#DIV/0!	#DIV/0!	#DIV/0!	#DIV/0!	#DIV/0!	#DIV/0!	#DIV/0!	#DIV/0!	#DIV/0!	#DIV/0!	#DIV/0!
1095	CB	CBX	FLmo	10692	Flocculus, molecular layer	#DIV/0!	#DIV/0!	#DIV/0!	#DIV/0!	#DIV/0!	#DIV/0!	#DIV/0!	#DIV/0!	#DIV/0!	#DIV/0!	#DIV/0!	#DIV/0!	#DIV/0!	#DIV/0!	#DIV/0!	#DIV/0!	#DIV/0!	#DIV/0!	#DIV/0!	#DIV/0!	#DIV/0!	#DIV/0!	#DIV/0!	#DIV/0!	#DIV/0!	#DIV/0!	#DIV/0!	#DIV/0!
1096	CB	CBX	FLpu	10691	Flocculus, Purkinje layer	#DIV/0!	#DIV/0!	#DIV/0!	#DIV/0!	#DIV/0!	#DIV/0!	#DIV/0!	#DIV/0!	#DIV/0!	#DIV/0!	#DIV/0!	#DIV/0!	#DIV/0!	#DIV/0!	#DIV/0!	#DIV/0!	#DIV/0!	#DIV/0!	#DIV/0!	#DIV/0!	#DIV/0!	#DIV/0!	#DIV/0!	#DIV/0!	#DIV/0!	#DIV/0!	#DIV/0!	#DIV/0!
1097	CB	CBX	FLgr	10690	Flocculus, granular layer	#DIV/0!	#DIV/0!	#DIV/0!	#DIV/0!	#DIV/0!	#DIV/0!	#DIV/0!	#DIV/0!	#DIV/0!	#DIV/0!	#DIV/0!	#DIV/0!	#DIV/0!	#DIV/0!	#DIV/0!	#DIV/0!	#DIV/0!	#DIV/0!	#DIV/0!	#DIV/0!	#DIV/0!	#DIV/0!	#DIV/0!	#DIV/0!	#DIV/0!	#DIV/0!	#DIV/0!	#DIV/0!
1098	CB	CBN	CBN	519	Cerebellar nuclei	#DIV/0!	#DIV/0!	#DIV/0!	#DIV/0!	#DIV/0!	#DIV/0!	#DIV/0!	#DIV/0!	#DIV/0!	#DIV/0!	#DIV/0!	#DIV/0!	#DIV/0!	#DIV/0!	#DIV/0!	#DIV/0!	#DIV/0!	#DIV/0!	#DIV/0!	#DIV/0!	#DIV/0!	#DIV/0!	#DIV/0!	#DIV/0!	#DIV/0!	#DIV/0!	#DIV/0!	#DIV/0!
1099	CB	CBN	FN	989	Fastigial nucleus	0.0186942	0.0279367	0.0190896	0.0275013	0.0573242	0.0556304	0.0629236	0.070695	0.0783073	0.118288	0.0939602	0.09558	0.00204551	0.000477815	0.00138083	0.00129616	0.00905549	0.0118799	0.00766765	0.00784041	0.0101729	0.0158842	0.0121823	0.026208	0.0244396	0.023659	0.0299829	0.0122905
1100	CB	CBN	IP	91	Interposed nucleus	#DIV/0!	#DIV/0!	#DIV/0!	#DIV/0!	0.0634743	#DIV/0!	0.0680126	#DIV/0!	#DIV/0!	#DIV/0!	#DIV/0!	#DIV/0!	#DIV/0!	#DIV/0!	#DIV/0!	#DIV/0!	#DIV/0!	#DIV/0!	#DIV/0!	#DIV/0!	0.0174757	0.0187072	#DIV/0!	0.026545	0.0186789	#DIV/0!	#DIV/0!	#DIV/0!
1101	CB	CBN	DN	846	Dentate nucleus	#DIV/0!	#DIV/0!	#DIV/0!	#DIV/0!	#DIV/0!	#DIV/0!	#DIV/0!	#DIV/0!	#DIV/0!	#DIV/0!	#DIV/0!	#DIV/0!	#DIV/0!	#DIV/0!	#DIV/0!	#DIV/0!	#DIV/0!	#DIV/0!	#DIV/0!	#DIV/0!	#DIV/0!	#DIV/0!	#DIV/0!	#DIV/0!	#DIV/0!	#DIV/0!	#DIV/0!	#DIV/0!
1102	CB	CBN	VeCB	589508455	Vestibulocerebellar nucleus	0.0173963	0.0348294	0.0105044	0.0202556	0.0501638	0.0431522	0.0557815	0.0733039	0.00297094	#DIV/0!	0.0935721	0.013181	#DIV/0!	0.00168847	0.000869378	#DIV/0!	0.00768348	0.00715955	0.00651835	0.0179353	0.0113005	0.0145067	0.00971545	0.0130578	0.0136493	0.0215805	0.021934	0.0103816
1103	fiber tracts	fiber tracts	tracts	1009	fiber tracts	0.00680943	0.0159634	0.00514864	0.0143063	0.0238753	0.0180967	0.0266739	0.0128585	0.0653129	0.0448121	0.0284826	0.0255403	0.000666808	0.000375295	0.000220213	0.00033578	0.00255155	0.00952394	0.0101411	0.00554265	0.0312246	0.0140648	0.0221843	0.0110613	0.0205906	0.0142759	0.0173567	0.00941084
1104	fiber tracts	cm	cm	967	cranial nerves	#DIV/0!	#DIV/0!	#DIV/0!	#DIV/0!	#DIV/0!	#DIV/0!	#DIV/0!	#DIV/0!	#DIV/0!	#DIV/0!	#DIV/0!	#DIV/0!	#DIV/0!	#DIV/0!	#DIV/0!	#DIV/0!	#DIV/0!	#DIV/0!	#DIV/0!	#DIV/0!	#DIV/0!	#DIV/0!	#DIV/0!	#DIV/0!	#DIV/0!	#DIV/0!	#DIV/0!	#DIV/0!
1105	fiber tracts	cm	tn	885	terminal nerve	#DIV/0!	#DIV/0!	#DIV/0!	#DIV/0!	#DIV/0!	#DIV/0!	#DIV/0!	#DIV/0!	#DIV/0!	#DIV/0!	#DIV/0!	#DIV/0!	#DIV/0!	#DIV/0!	#DIV/0!	#DIV/0!	#DIV/0!	#DIV/0!	#DIV/0!	#DIV/0!	#DIV/0!	#DIV/0!	#DIV/0!	#DIV/0!	#DIV/0!	#DIV/0!	#DIV/0!	#DIV/0!
1106	fiber tracts	cm	von	949	vomeronasal nerve	0.00110331	#DIV/0!	#DIV/0!	0.0122526	#DIV/0!	0.0255069	#DIV/0!	#DIV/0!	0.0666162	0.123111	0.0739588	0.0697874	#DIV/0!	#DIV/0!	#DIV/0!	#DIV/0!	#DIV/0!	#DIV/0!	#DIV/0!	#DIV/0!	#DIV/0!	#DIV/0!	0.0113831	#DIV/0!	#DIV/0!	0.0206785	0.0327399	0.0137271
1107	fiber tracts	cm	In	840	olfactory nerve	#DIV/0!	#DIV/0!	#DIV/0!	#DIV/0!	#DIV/0!	#DIV/0!	#DIV/0!	#DIV/0!	#DIV/0!	#DIV/0!	#DIV/0!	#DIV/0!	#DIV/0!	#DIV/0!	#DIV/0!	#DIV/0!	#DIV/0!	#DIV/0!	#DIV/0!	#DIV/0!	#DIV/0!	#DIV/0!	#DIV/0!	#DIV/0!	#DIV/0!	#DIV/0!	#DIV/0!	#DIV/0!
1108	fiber tracts	cm	onl	1016	olfactory nerve layer of main olfactory bulb	0.0170899	0.0244597	0.0170958	0.0380809	0.0775698	0.0666754	0.0768748	0.0171794	0.0922689	0.0997999	0.0723448	0.0738316	0.00176844	0.00180504	0.0131254	0.000168782	0.0144248	0.0104382	0.0140758	0.00660309	0.00590724	0.00818343	0.00774757	0.00671313	0.00770787	0.0129324	0.0109205	0.010203
1109	fiber tracts	cm	lotg	21	lateral olfactory tract, general	#DIV/0!	#DIV/0!	#DIV/0!	#DIV/0!	#DIV/0!	#DIV/0!	#DIV/0!	#DIV/0!	#DIV/0!	#DIV/0!	#DIV/0!	#DIV/0!	#DIV/0!	#DIV/0!	#DIV/0!	#DIV/0!	#DIV/0!	#DIV/0!	#DIV/0!	#DIV/0!	#DIV/0!	#DIV/0!	#DIV/0!	#DIV/0!	#DIV/0!	#DIV/0!	#DIV/0!	#DIV/0!
1110	fiber tracts	cm	lot	665	lateral olfactory tract, body	#DIV/0!	#DIV/0!	0.000615926	0.0146502	0.0414784	#DIV/0!	0.056475	0.0165897	0.326194	#DIV/0!	0.0361864	0.0392066	#DIV/0!	#DIV/0!	#DIV/0!	#DIV/0!	#DIV/0!	0.00520183	0.0255809	#DIV/0!	0.00147659	0.00626249	#DIV/0!	0.0110188	0.00730616	#DIV/0!	#DIV/0!	#DIV/0!
1111	fiber tracts	cm	lotd	538	dorsal limb	0.0163058	0.0137212	0.0201699	0.0226713	0.074797	0.045237	0.0665724	0.0502119	0.110507	0.0828785	0.112637	0.0858789	0.00369006	#DIV/0!	0.000941078	#DIV/0!	0.00509165	0.00690222	0.00481806	0.00525016	0.0109293	0.0076917	0.00377589	0.00838991	0.00989978	0.012042	0.0209075	0.0091757
1112	fiber tracts	cm	aolt	459	accessory olfactory tract	#DIV/0!	#DIV/0!	#DIV/0!	#DIV/0!	#DIV/0!	#DIV/0!	#DIV/0!	#DIV/0!	#DIV/0!	#DIV/0!	#DIV/0!	#DIV/0!	#DIV/0!	#DIV/0!	#DIV/0!	#DIV/0!	#DIV/0!	#DIV/0!	#DIV/0!	#DIV/0!	#DIV/0!	#DIV/0!	#DIV/0!	#DIV/0!	#DIV/0!	#DIV/0!	#DIV/0!	#DIV/0!
1113	fiber tracts	cm	aco	900	anterior commissure, olfactory limb	0.0085899	0.0116388	0.0159161	0.00865609	0.0207147	0.0184306	0.0558998	0.026678	0.0510659	0.0486078	0.0347994	0.0413329	0.000209806	0.000467829	0.000570961	#DIV/0!	0.00694312	0.00480545	0.00544173	0.00571835	0.00746014	0.00834199	0.00794327	0.00880051	0.0191476	0.0137669	0.0192737	0.0146371
1114	fiber tracts	cm	IIn	848	optic nerve	0.0026586	#DIV/0!	#DIV/0!	0.0317179	#DIV/0!	0.00162221	#DIV/0!	#DIV/0!	#DIV/0!	#DIV/0!	#DIV/0!	#DIV/0!	#DIV/0!	#DIV/0!	#DIV/0!	#DIV/0!	#DIV/0!	#DIV/0!	#DIV/0!	0.00105385	#DIV/0!	#DIV/0!	#DIV/0!	#DIV/0!	#DIV/0!	#DIV/0!	#DIV/0!	#DIV/0!
1115	fiber tracts	cm	aot	876	accessory optic tract	#DIV/0!	#DIV/0!	#DIV/0!	#DIV/0!	#DIV/0!	#DIV/0!	#DIV/0!	#DIV/0!	#DIV/0!	#DIV/0!	#DIV/0!	#DIV/0!	#DIV/0!	#DIV/0!	#DIV/0!	#DIV/0!	#DIV/0!	#DIV/0!	#DIV/0!	#DIV/0!	#DIV/0!	#DIV/0!	#DIV/0!	#DIV/0!	#DIV/0!	#DIV/0!	#DIV/0!	#DIV/0!
1116	fiber tracts	cm	bsc	916	brachium of the superior colliculus	#DIV/0!	#DIV/0!	#DIV/0!	#DIV/0!	0.0119749	#DIV/0!	0.0162119	#DIV/0!	#DIV/0!	#DIV/0!	#DIV/0!	#DIV/0!	#DIV/0!	#DIV/0!	#DIV/0!	#DIV/0!	#DIV/0!	#DIV/0!	#DIV/0!	#DIV/0!	0.00581597	0.00578317	#DIV/0!	0.0177992	0.00120886	#DIV/0!	#DIV/0!	#DIV/0!
1117	fiber tracts	cm	csc	336	superior colliculus commissure	0.012569	#DIV/0!	#DIV/0!	#DIV/0!	#DIV/0!	#DIV/0!	#DIV/0!	#DIV/0!	#DIV/0!	#DIV/0!	#DIV/0!	#DIV/0!	#DIV/0!	#DIV/0!	#DIV/0!	#DIV/0!	#DIV/0!	#DIV/0!	#DIV/0!	#DIV/0!	#DIV/0!	#DIV/0!	#DIV/0!	#DIV/0!	#DIV/0!	#DIV/0!	#DIV/0!	#DIV/0!
1118	fiber tracts	cm	och	117	optic chiasm	0.00298308	0.0216231	0.000516229	0.0256404	#DIV/0!	0.00030966	0.000126162	#DIV/0!	0.0390616	0.0231324	0.000839949	0.00141806	0.000186759	0.000927323	#DIV/0!	#DIV/0!	0.00422397	0.031419	0.00904259	0.00679378	#DIV/0!	0.00397555	0.0379388	2.43304e-05	0.0164503	0.0019452	0.0056244	#DIV/0!
1119	fiber tracts	cm	opt	125	optic tract	0.00630333	0.00750861	0.00228428	0.00913218	0.0262193	#DIV/0!	0.0179668	0.00205795	0.0686501	0.0205856	0.0248149	0.0170499	0.000268417	#DIV/0!	#DIV/0!	#DIV/0!	0.00127627	0.00990823	0.00994207	0.0016644	0.0181169	0.0142669	0.00683156	0.00773083	0.015221	0.00959299	0.0101576	0.00509964
1120	fiber tracts	cm	ttp	357	tectothalamic pathway	#DIV/0!	#DIV/0!	#DIV/0!	#DIV/0!	#DIV/0!	#DIV/0!	#DIV/0!	#DIV/0!	#DIV/0!	#DIV/0!	#DIV/0!	#DIV/0!	#DIV/0!	#DIV/0!	#DIV/0!	#DIV/0!	#DIV/0!	#DIV/0!	#DIV/0!	#DIV/0!	#DIV/0!	#DIV/0!	#DIV/0!	#DIV/0!	#DIV/0!	#DIV/0!	#DIV/0!	#DIV/0!
1121	fiber tracts	cm	IIIn	832	oculomotor nerve	0.0033057	#DIV/0!	0.015253	0.0206349	0.0234226	#DIV/0!	0.0827132	0.0780581	#DIV/0!	#DIV/0!	0.103791	0.169428	#DIV/0!	#DIV/0!	#DIV/0!	#DIV/0!	#DIV/0!	0.0183562	6.90496e-05	#DIV/0!	0.0234969	0.0229604	#DIV/0!	0.0213599	0.0285365	#DIV/0!	#DIV/0!	#DIV/0!
1122	fiber tracts	cm	mlf	62	medial longitudinal fascicle	0.0350289	#DIV/0!	#DIV/0!	#DIV/0!	#DIV/0!	#DIV/0!	#DIV/0!	#DIV/0!	#DIV/0!	#DIV/0!	#DIV/0!	#DIV/0!	#DIV/0!	#DIV/0!	#DIV/0!	#DIV/0!	#DIV/0!	#DIV/0!	#DIV/0!	#DIV/0!	#DIV/0!	#DIV/0!	#DIV/0!	#DIV/0!	#DIV/0!	#DIV/0!	#DIV/0!	#DIV/0!
1123	fiber tracts	cm	pc	158	posterior commissure	0.0122135	#DIV/0!	#DIV/0!	#DIV/0!	#DIV/0!	#DIV/0!	#DIV/0!	#DIV/0!	#DIV/0!	#DIV/0!	#DIV/0!	#DIV/0!	#DIV/0!	#DIV/0!	#DIV/0!	#DIV/0!	#DIV/0!	#DIV/0!	#DIV/0!	#DIV/0!	#DIV/0!	#DIV/0!	#DIV/0!	#DIV/0!	#DIV/0!	#DIV/0!	#DIV/0!	#DIV/0!
1124	fiber tracts	cm	IVn	911	trochlear nerve	#DIV/0!	0.0444167	#DIV/0!	0.0196595	0.0684181	0.0261529	#DIV/0!	#DIV/0!	0.0942843	0.109313	0.0176729	#DIV/0!	#DIV/0!	#DIV/0!	#DIV/0!	#DIV/0!	#DIV/0!	0.0378937	#DIV/0!	#DIV/0!	#DIV/0!	0.045158	0.0670253	0.0289679	0.0238295	0.0502803	0.0445626	0.025677
1125	fiber tracts	cm	IVd	384	trochlear nerve decussation	#DIV/0!	#DIV/0!	#DIV/0!	#DIV/0!	#DIV/0!	#DIV/0!	#DIV/0!	#DIV/0!	#DIV/0!	#DIV/0!	#DIV/0!	#DIV/0!	#DIV/0!	#DIV/0!	#DIV/0!	#DIV/0!	#DIV/0!	#DIV/0!	#DIV/0!	#DIV/0!	#DIV/0!	#DIV/0!	#DIV/0!	#DIV/0!	#DIV/0!	#DIV/0!	#DIV/0!	#DIV/0!
1126	fiber tracts	cm	VIn	710	abducens nerve	#DIV/0!	#DIV/0!	#DIV/0!	#DIV/0!	#DIV/0!	#DIV/0!	#DIV/0!	#DIV/0!	#DIV/0!	#DIV/0!	#DIV/0!	#DIV/0!	#DIV/0!	#DIV/0!	#DIV/0!	#DIV/0!	#DIV/0!	#DIV/0!	#DIV/0!	#DIV/0!	#DIV/0!	#DIV/0!	#DIV/0!	#DIV/0!	#DIV/0!	#DIV/0!	#DIV/0!	#DIV/0!
1127	fiber tracts	cm	Vn	901	trigeminal nerve	#DIV/0!	#DIV/0!	#DIV/0!	#DIV/0!	#DIV/0!	#DIV/0!	#DIV/0!	#DIV/0!	#DIV/0!	#DIV/0!	#DIV/0!	#DIV/0!	#DIV/0!	#DIV/0!	#DIV/0!	#DIV/0!	#DIV/0!	#DIV/0!	#DIV/0!	#DIV/0!	#DIV/0!	#DIV/0!	#DIV/0!	#DIV/0!	#DIV/0!	#DIV/0!	#DIV/0!	#DIV/0!
1128	fiber tracts	cm	moV	93	motor root of the trigeminal nerve	#DIV/0!	#DIV/0!	#DIV/0!	#DIV/0!	#DIV/0!	#DIV/0!	#DIV/0!	#DIV/0!	#DIV/0!	#DIV/0!	#DIV/0!	#DIV/0!	#DIV/0!	#DIV/0!	#DIV/0!	#DIV/0!	#DIV/0!	#DIV/0!	#DIV/0!	#DIV/0!	#DIV/0!	#DIV/0!	#DIV/0!	#DIV/0!	#DIV/0!	#DIV/0!	#DIV/0!	#DIV/0!
1129	fiber tracts	cm	sV	229	sensory root of the trigeminal nerve	#DIV/0!	#DIV/0!	#DIV/0!	#DIV/0!	#DIV/0!	#DIV/0!	#DIV/0!	#DIV/0!	#DIV/0!	#DIV/0!	#DIV/0!	#DIV/0!	#DIV/0!	#DIV/0!	#DIV/0!	#DIV/0!	#DIV/0!	#DIV/0!	#DIV/0!	#DIV/0!	#DIV/0!	#DIV/0!	#DIV/0!	#DIV/0!	#DIV/0!	#DIV/0!	#DIV/0!	#DIV/0!
1130	fiber tracts	cm	mtV	705	midbrain tract of the trigeminal nerve	#DIV/0!	#DIV/0!	#DIV/0!	#DIV/0!	#DIV/0!	#DIV/0!	#DIV/0!	#DIV/0!	#DIV/0!	#DIV/0!	#DIV/0!	#DIV/0!	#DIV/0!	#DIV/0!	#DIV/0!	#DIV/0!	#DIV/0!	#DIV/0!	#DIV/0!	#DIV/0!	#DIV/0!	#DIV/0!	#DIV/0!	#DIV/0!	#DIV/0!	#DIV/0!	#DIV/0!	#DIV/0!
1131	fiber tracts	cm	sptV	794	spinal tract of the trigeminal nerve	#DIV/0!	#DIV/0!	#DIV/0!	#DIV/0!	#DIV/0!	#DIV/0!	0.044782	#DIV/0!	0.102678	#DIV/0!	#DIV/0!	#DIV/0!	#DIV/0!	#DIV/0!	#DIV/0!	#DIV/0!	#DIV/0!	#DIV/0!	#DIV/0!	#DIV/0!	0.0111596	0.0374417	#DIV/0!	#DIV/0!	#DIV/0!	#DIV/0!	#DIV/0!	#DIV/0!
1132	fiber tracts	cm	VIIn	798	facial nerve	0.0152164	0.0154796	0.0169061	0.0157527	0.0288406	0.0428171	0.0305881	0.0161094	0.0351721	0.0385544	0.0277542	0.0425549	0.00113704	0.00237391	#DIV/0!	0.00319846	0.00114336	0.00181699	0.0035205	0.00534804	0.0103668	0.00545104	0.0109694	0.0049597	0.0108182	0.0138223	0.0073612	0.0218798
1133	fiber tracts	cm	iVIIn	1131	intermediate nerve	#DIV/0!	#DIV/0!	#DIV/0!	#DIV/0!	#DIV/0!	#DIV/0!	#DIV/0!	#DIV/0!	#DIV/0!	#DIV/0!	#DIV/0!	#DIV/0!	#DIV/0!	#DIV/0!	#DIV/0!	#DIV/0!	#DIV/0!	#DIV/0!	#DIV/0!	#DIV/0!	#DIV/0!	#DIV/0!	#DIV/0!	#DIV/0!	#DIV/0!	#DIV/0!	#DIV/0!	#DIV/0!
1134	fiber tracts	cm	gVIIn	1116	genu of the facial nerve	0.0339221	0.0247103	0.0135368	0.0186259	0.0173511	0.056669	0.0595882	0.0204156	0.071648	0.032598	0.0174512	0.0981175	0.00310985	0.00257819	#DIV/0!	0.00208206	0.00858978	0.00094975	0.00824065	0.00217063	#DIV/0!	0.003144	0.0133477	0.00531339	0.0212609	0.0111308	0.0322994	0.01343
1135	fiber tracts	cm	VIIIn	933	vestibulocochlear nerve	#DIV/0!	#DIV/0!	#DIV/0!	#DIV/0!	#DIV/0!	#DIV/0!	#DIV/0!	#DIV/0!	#DIV/0!	#DIV/0!	#DIV/0!	#DIV/0!	#DIV/0!	#DIV/0!	#DIV/0!	#DIV/0!	#DIV/0!	#DIV/0!	#DIV/0!	#DIV/0!	#DIV/0!	#DIV/0!	#DIV/0!	#DIV/0!	#DIV/0!	#DIV/0!	#DIV/0!	#DIV/0!
1136	fiber tracts	cm	cvb	1076	efferent cochleovestibular bundle	#DIV/0!	#DIV/0!	#DIV/0!	#DIV/0!	#DIV/0!	#DIV/0!	#DIV/0!	#DIV/0!	#DIV/0!	#DIV/0!	#DIV/0!	#DIV/0!	#DIV/0!	#DIV/0!	#DIV/0!	#DIV/0!	#DIV/0!	#DIV/0!	#DIV/0!	#DIV/0!	#DIV/0!	#DIV/0!	#DIV/0!	#DIV/0!	#DIV/0!	#DIV/0!	#DIV/0!	#DIV/0!
1137	fiber tracts	cm	vVIIIn	413	vestibular nerve	#DIV/0!	#DIV/0!	#DIV/0!	#DIV/0!	#DIV/0!	#DIV/0!	#DIV/0!	#DIV/0!	#DIV/0!	#DIV/0!	#DIV/0!	#DIV/0!	#DIV/0!	#DIV/0!	#DIV/0!	#DIV/0!	#DIV/0!	#DIV/0!	#DIV/0!	#DIV/0!	#DIV/0!	#DIV/0!	#DIV/0!	#DIV/0!	#DIV/0!	#DIV/0!	#DIV/0!	#DIV/0!
1138	fiber tracts	cm	cVIIIn	948	cochlear nerve	#DIV/0!	#DIV/0!	#DIV/0!	#DIV/0!	#DIV/0!	#DIV/0!	#DIV/0!	#DIV/0!	#DIV/0!	#DIV/0!	#DIV/0!	#DIV/0!	#DIV/0!	#DIV/0!	#DIV/0!	#DIV/0!	#DIV/0!	#DIV/0!	#DIV/0!	#DIV/0!	#DIV/0!	#DIV/0!	#DIV/0!	#DIV/0!	#DIV/0!	#DIV/0!	#DIV/0!	#DIV/0!
1139	fiber tracts	cm	tb	841	trapezoid body	0.00253903	0.0184737	0.0053691	0.019142	0.0387204	0.0168271	0.02565	0.0146574	0.0236714	0.0504144	0.0280112	0.0607443	0.000573231	#DIV/0!	0.000137677	0.000384771	0.00489754	0.00940338	0.00643667	0.0121198	0.0104682	0.00538356	0.00665845	0.0175005	0.0044738	0.00619776	0.0254838	0.00922224
1140	fiber tracts	cm	ias	641	intermediate acoustic stria	#DIV/0!	#DIV/0!	#DIV/0!	#DIV/0!	#DIV/0!	#DIV/0!	#DIV/0!	#DIV/0!	#DIV/0!	#DIV/0!	#DIV/0!	#DIV/0!	#DIV/0!	#DIV/0!	#DIV/0!	#DIV/0!	#DIV/0!	#DIV/0!	#DIV/0!	#DIV/0!	#DIV/0!	#DIV/0!	#DIV/0!	#DIV/0!	#DIV/0!	#DIV/0!	#DIV/0!	#DIV/0!
1141	fiber tracts	cm	das	506	dorsal acoustic stria	9.34248e-05	#DIV/0!	0.00680599	0.0194778	0.0201566	#DIV/0!	0.0381824	0.0469258	0.00209752	#DIV/0!	0.0994716	0.0527347	#DIV/0!	#DIV/0!	0.00409659	#DIV/0!	#DIV/0!	0.0165186	#DIV/0!	#DIV/0!	0.0145586	0.0289775	#DIV/0!	0.0166583	0.0207183	#DIV/0!	#DIV/0!	#DIV/0!
1142	fiber tracts	cm	ll	658	lateral lemniscus	0.0147742	#DIV/0!	0.00741285	0.0260993	0.0474942	#DIV/0!	0.0359924	0.0543002	#DIV/0!	#DIV/0!	0.0615614	0.0632021	#DIV/0!	#DIV/0!	0.000479611	#DIV/0!	#DIV/0!	0.0015819	0.0167225	#DIV/0!	0.0142951	0.0204659	#DIV/0!	0.021201	0.0257224	#DIV/0!	#DIV/0!	#DIV/0!
1143	fiber tracts	cm	cic	633	inferior colliculus commissure	0.0140167	0.0190817	0.00466211	0.016884	#DIV/0!	0.0506556	#DIV/0!	#DIV/0!	#DIV/0!	#DIV/0!	#DIV/0!	0.0438083	#DIV/0!	#DIV/0!	#DIV/0!	#DIV/0!	0.0201537	0.00669432	#DIV/0!	0.0300747	#DIV/0!	#DIV/0!	#DIV/0!	0.0142685	#DIV/0!	0.0370398	0.0175747	#DIV/0!
1144	fiber tracts	cm	bic	482	brachium of the inferior colliculus	#DIV/0!	#DIV/0!	#DIV/0!	#DIV/0!	#DIV/0!	#DIV/0!	#DIV/0!	#DIV/0!	#DIV/0!	#DIV/0!	#DIV/0!	#DIV/0!	#DIV/0!	#DIV/0!	#DIV/0!	#DIV/0!	#DIV/0!	#DIV/0!	#DIV/0!	#DIV/0!	#DIV/0!	#DIV/0!	#DIV/0!	#DIV/0!	#DIV/0!	#DIV/0!	#DIV/0!	#DIV/0!
1145	fiber tracts	cm	IXn	808	glossopharyngeal nerve	#DIV/0!	#DIV/0!	#DIV/0!	#DIV/0!	#DIV/0!	#DIV/0!	#DIV/0!	#DIV/0!	#DIV/0!	#DIV/0!	#DIV/0!	#DIV/0!	#DIV/0!	#DIV/0!	#DIV/0!	#DIV/0!	#DIV/0!	#DIV/0!	#DIV/0!	#DIV/0!	#DIV/0!	#DIV/0!	#DIV/0!	#DIV/0!	#DIV/0!	#DIV/0!	#DIV/0!	#DIV/0!
1146	fiber tracts	cm	Xn	917	vagus nerve	#DIV/0!	#DIV/0!	#DIV/0!	#DIV/0!	#DIV/0!	#DIV/0!	#DIV/0!	#DIV/0!	#DIV/0!	#DIV/0!	#DIV/0!	#DIV/0!	#DIV/0!	#DIV/0!	#DIV/0!	#DIV/0!	#DIV/0!	#DIV/0!	#DIV/0!	#DIV/0!	#DIV/0!	#DIV/0!	#DIV/0!	#DIV/0!	#DIV/0!	#DIV/0!	#DIV/0!	#DIV/0!
1147	fiber tracts	cm	ts	237	solitary tract	0.0116236	0.00243613	0.0417208	0.0357342	0.0885075	0.0661734	0.0374814	0.0910181	0.106574	0.109211	0.154555	0.131115	0.00245985	#DIV/0!	0.0018049	#DIV/0!	0.0129918	0.0111685	0.0196587	0.00206433	#DIV/0!	0.0428032	0.0556632	0.0251633	0.0376257	0.0411333	0.0522464	#DIV/0!
1148	fiber tracts	cm	XIn	717	accessory spinal nerve	#DIV/0!	#DIV/0!	#DIV/0!	#DIV/0!	#DIV/0!	#DIV/0!	#DIV/0!	#DIV/0!	#DIV/0!	#DIV/0!	#DIV/0!	#DIV/0!	#DIV/0!	#DIV/0!	#DIV/0!	#DIV/0!	#DIV/0!	#DIV/0!	#DIV/0!	#DIV/0!	#DIV/0!	#DIV/0!	#DIV/0!	#DIV/0!	#DIV/0!	#DIV/0!	#DIV/0!	#DIV/0!
1149	fiber tracts	cm	XIIn	813	hypoglossal nerve	#DIV/0!	#DIV/0!	#DIV/0!	#DIV/0!	#DIV/0!	#DIV/0!	#DIV/0!	#DIV/0!	#DIV/0!	#DIV/0!	#DIV/0!	#DIV/0!	#DIV/0!	#DIV/0!	#DIV/0!	#DIV/0!	#DIV/0!	#DIV/0!	#DIV/0!	#DIV/0!	#DIV/0!	#DIV/0!	#DIV/0!	#DIV/0!	#DIV/0!	#DIV/0!	#DIV/0!	#DIV/0!
1150	fiber tracts	cm	vrt	925	ventral roots	#DIV/0!	#DIV/0!	#DIV/0!	#DIV/0!	#DIV/0!	#DIV/0!	#DIV/0!	#DIV/0!	#DIV/0!	#DIV/0!	#DIV/0!	#DIV/0!	#DIV/0!	#DIV/0!	#DIV/0!	#DIV/0!	#DIV/0!	#DIV/0!	#DIV/0!	#DIV/0!	#DIV/0!	#DIV/0!	#DIV/0!	#DIV/0!	#DIV/0!	#DIV/0!	#DIV/0!	#DIV/0!
1151	fiber tracts	cm	drt	792	dorsal roots	#DIV/0!	#DIV/0!	#DIV/0!	#DIV/0!	#DIV/0!	#DIV/0!	#DIV/0!	#DIV/0!	#DIV/0!	#DIV/0!	#DIV/0!	#DIV/0!	#DIV/0!	#DIV/0!	#DIV/0!	#DIV/0!	#DIV/0!	#DIV/0!	#DIV/0!	#DIV/0!	#DIV/0!	#DIV/0!	#DIV/0!	#DIV/0!	#DIV/0!	#DIV/0!	#DIV/0!	#DIV/0!
1152	fiber tracts	cm	cett	932	cervicothalamic tract	#DIV/0!	#DIV/0!	#DIV/0!	#DIV/0!	#DIV/0!	#DIV/0!	#DIV/0!	#DIV/0!	#DIV/0!	#DIV/0!	#DIV/0!	#DIV/0!	#DIV/0!	#DIV/0!	#DIV/0!	#DIV/0!	#DIV/0!	#DIV/0!	#DIV/0!	#DIV/0!	#DIV/0!	#DIV/0!	#DIV/0!	#DIV/0!	#DIV/0!	#DIV/0!	#DIV/0!	#DIV/0!
1153	fiber tracts	cm	dl	570	dorsolateral fascicle	#DIV/0!	#DIV/0!	#DIV/0!	#DIV/0!	#DIV/0!	#DIV/0!	#DIV/0!	#DIV/0!	#DIV/0!	#DIV/0!	#DIV/0!	#DIV/0!	#DIV/0!	#DIV/0!	#DIV/0!	#DIV/0!	#DIV/0!	#DIV/0!	#DIV/0!	#DIV/0!	#DIV/0!	#DIV/0!	#DIV/0!	#DIV/0!	#DIV/0!	#DIV/0!	#DIV/0!	#DIV/0!
1154	fiber tracts	cm	dcm	522	dorsal commissure of the spinal cord	#DIV/0!	#DIV/0!	#DIV/0!	#DIV/0!	#DIV/0!	#DIV/0!	#DIV/0!	#DIV/0!	#DIV/0!	#DIV/0!	#DIV/0!	#DIV/0!	#DIV/0!	#DIV/0!	#DIV/0!	#DIV/0!	#DIV/0!	#DIV/0!	#DIV/0!	#DIV/0!	#DIV/0!	#DIV/0!	#DIV/0!	#DIV/0!	#DIV/0!	#DIV/0!	#DIV/0!	#DIV/0!
1155	fiber tracts	cm	vc	858	ventral commissure of the spinal cord	#DIV/0!	#DIV/0!	#DIV/0!	#DIV/0!	#DIV/0!	#DIV/0!	#DIV/0!	#DIV/0!	#DIV/0!	#DIV/0!	#DIV/0!	#DIV/0!	#DIV/0!	#DIV/0!	#DIV/0!	#DIV/0!	#DIV/0!	#DIV/0!	#DIV/0!	#DIV/0!	#DIV/0!	#DIV/0!	#DIV/0!	#DIV/0!	#DIV/0!	#DIV/0!	#DIV/0!	#DIV/0!
1156	fiber tracts	cm	fpr	586	fasciculus proprius	#DIV/0!	#DIV/0!	#DIV/0!	#DIV/0!	#DIV/0!	#DIV/0!	#DIV/0!	#DIV/0!	#DIV/0!	#DIV/0!	#DIV/0!	#DIV/0!	#DIV/0!	#DIV/0!	#DIV/0!	#DIV/0!	#DIV/0!	#DIV/0!	#DIV/0!	#DIV/0!	#DIV/0!	#DIV/0!	#DIV/0!	#DIV/0!	#DIV/0!	#DIV/0!	#DIV/0!	#DIV/0!
1157	fiber tracts	cm	dc	514	dorsal column	#DIV/0!	#DIV/0!	#DIV/0!	#DIV/0!	#DIV/0!	#DIV/0!	#DIV/0!	#DIV/0!	#DIV/0!	#DIV/0!	#DIV/0!	#DIV/0!	#DIV/0!	#DIV/0!	#DIV/0!	#DIV/0!	#DIV/0!	#DIV/0!	#DIV/0!	#DIV/0!	#DIV/0!	#DIV/0!	#DIV/0!	#DIV/0!	#DIV/0!	#DIV/0!	#DIV/0!	#DIV/0!
1158	fiber tracts	cm	cuf	380	cuneate fascicle	0.0128765	0.00734712	0.00101612	#DIV/0!	#DIV/0!	0.0214656	0.0206305	0.0514777	#DIV/0!	#DIV/0!	0.0484874	0.015574	#DIV/0!	#DIV/0!	#DIV/0!	#DIV/0!	0.00978215	#DIV/0!	0.00540269	0.00585497	0.00218342	0.0270507	0.00893476	0.00692285	0.00265551	0.0258992	0.0182493	0.0221177
1159	fiber tracts	cm	grf	388	gracile fascicle	#DIV/0!	#DIV/0!	#DIV/0!	#DIV/0!	#DIV/0!	#DIV/0!	#DIV/0!	#DIV/0!	#DIV/0!	#DIV/0!	#DIV/0!	#DIV/0!	#DIV/0!	#DIV/0!	#DIV/0!	#DIV/0!	#DIV/0!	#DIV/0!	#DIV/0!	#DIV/0!	#DIV/0!	#DIV/0!	#DIV/0!	#DIV/0!	#DIV/0!	#DIV/0!	#DIV/0!	#DIV/0!
1160	fiber tracts	cm	iaf	396	internal arcuate fibers	#DIV/0!	#DIV/0!	#DIV/0!	#DIV/0!	#DIV/0!	#DIV/0!	#DIV/0!	#DIV/0!	#DIV/0!	#DIV/0!	#DIV/0!	#DIV/0!	#DIV/0!	#DIV/0!	#DIV/0!	#DIV/0!	#DIV/0!	#DIV/0!	#DIV/0!	#DIV/0!	#DIV/0!	#DIV/0!	#DIV/0!	#DIV/0!	#DIV/0!	#DIV/0!	#DIV/0!	#DIV/0!
1161	fiber tracts	cm	ml	697	medial lemniscus	0.016021	0.0243221	0.0139462	0.0166076	0.0376554	0.0476782	0.0556516	0.0332317	0.0700446	0.062138	0.0564423	0.0821893	0.000615212	0.000792667	0.000444747	0.000965403	0.00662985	0.00653923	0.00660882	0.0185739	0.0160044	0.00890201	0.0154056	0.0118893	0.0161339	0.0239587	0.014474	0.0215438
1162	fiber tracts	cm	sst	871	spinothalamic tract	#DIV/0!	#DIV/0!	#DIV/0!	#DIV/0!	#DIV/0!	#DIV/0!	#DIV/0!	#DIV/0!	#DIV/0!	#DIV/0!	#DIV/0!	#DIV/0!	#DIV/0!	#DIV/0!	#DIV/0!	#DIV/0!	#DIV/0!	#DIV/0!	#DIV/0!	#DIV/0!	#DIV/0!	#DIV/0!	#DIV/0!	#DIV/0!	#DIV/0!	#DIV/0!	#DIV/0!	#DIV/0!
1163	fiber tracts	cm	sttl	29	lateral spinothalamic tract	#DIV/0!	#DIV/0!	#DIV/0!	#DIV/0!	#DIV/0!	#DIV/0!	#DIV/0!	#DIV/0!	#DIV/0!	#DIV/0!	#DIV/0!	#DIV/0!	#DIV/0!	#DIV/0!	#DIV/0!	#DIV/0!	#DIV/0!	#DIV/0!	#DIV/0!	#DIV/0!	#DIV/0!	#DIV/0!	#DIV/0!	#DIV/0!	#DIV/0!	#DIV/0!	#DIV/0!	#DIV/0!
1164	fiber tracts	cm	sttv	389	ventral spinothalamic tract	#DIV/0!	#DIV/0!	#DIV/0!	#DIV/0!	#DIV/0!	#DIV/0!	#DIV/0!	#DIV/0!	#DIV/0!	#DIV/0!	#DIV/0!	#DIV/0!	#DIV/0!	#DIV/0!	#DIV/0!	#DIV/0!	#DIV/0!	#DIV/0!	#DIV/0!	#DIV/0!	#DIV/0!	#DIV/0!	#DIV/0!	#DIV/0!	#DIV/0!	#DIV/0!	#DIV/0!	#DIV/0!
1165	fiber tracts	cm	scrt	245	spinocervical tract	#DIV/0!	#DIV/0!	#DIV/0!	#DIV/0!	#DIV/0!	#DIV/0!	#DIV/0!	#DIV/0!	#DIV/0!	#DIV/0!	#DIV/0!	#DIV/0!	#DIV/0!	#DIV/0!	#DIV/0!	#DIV/0!	#DIV/0!	#DIV/0!	#DIV/0!	#DIV/0!	#DIV/0!	#DIV/0!	#DIV/0!	#DIV/0!	#DIV/0!	#DIV/0!	#DIV/0!	#DIV/0!
1166	fiber tracts	cm	sop	261	spino-olivary pathway	#DIV/0!	#DIV/0!	#DIV/0!	#DIV/0!	#DIV/0!	#DIV/0!	#DIV/0!	#DIV/0!	#DIV/0!	#DIV/0!	#DIV/0!	#DIV/0!	#DIV/0!	#DIV/0!	#DIV/0!	#DIV/0!	#DIV/0!	#DIV/0!	#DIV/0!	#DIV/0!	#DIV/0!	#DIV/0!	#DIV/0!	#DIV/0!	#DIV/0!	#DIV/0!	#DIV/0!	#DIV/0!
1167	fiber tracts	cm	srp	270	spinoreticular pathway	#DIV/0!	#DIV/0!	#DIV/0!	#DIV/0!	#DIV/0!	#DIV/0!	#DIV/0!	#DIV/0!	#DIV/0!	#DIV/0!	#DIV/0!	#DIV/0!	#DIV/0!	#DIV/0!	#DIV/0!	#DIV/0!	#DIV/0!	#DIV/0!	#DIV/0!	#DIV/0!	#DIV/0!	#DIV/0!	#DIV/0!	#DIV/0!	#DIV/0!	#DIV/0!	#DIV/0!	#DIV/0!
1168	fiber tracts	cm	svp	293	spinovestibular pathway	#DIV/0!	#DIV/0!	#DIV/0!	#DIV/0!	#DIV/0!	#DIV/0!	#DIV/0!	#DIV/0!	#DIV/0!	#DIV/0!	#DIV/0!	#DIV/0!	#DIV/0!	#DIV/0!	#DIV/0!	#DIV/0!	#DIV/0!	#DIV/0!	#DIV/0!	#DIV/0!	#DIV/0!	#DIV/0!	#DIV/0!	#DIV/0!	#DIV/0!	#DIV/0!	#DIV/0!	#DIV/0!
1169	fiber tracts	cm	stp	277	spinotectal pathway	#DIV/0!	#DIV/0!	#DIV/0!	#DIV/0!	#DIV/0!	#DIV/0!	#DIV/0!	#DIV/0!	#DIV/0!	#DIV/0!	#DIV/0!	#DIV/0!	#DIV/0!	#DIV/0!	#DIV/0!	#DIV/0!	#DIV/0!	#DIV/0!	#DIV/0!	#DIV/0!	#DIV/0!	#DIV/0!	#DIV/0!	#DIV/0!	#DIV/0!	#DIV/0!	#DIV/0!	#DIV/0!
1170	fiber tracts	cm	shp	253	spinohypothalamic pathway	#DIV/0!	#DIV/0!	#DIV/0!	#DIV/0!	#DIV/0!	#DIV/0!	#DIV/0!	#DIV/0!	#DIV/0!	#DIV/0!	#DIV/0!	#DIV/0!	#DIV/0!	#DIV/0!	#DIV/0!	#DIV/0!	#DIV/0!	#DIV/0!	#DIV/0!	#DIV/0!	#DIV/0!	#DIV/0!	#DIV/0!	#DIV/0!	#DIV/0!	#DIV/0!	#DIV/0!	#DIV/0!
1171	fiber tracts	cm	step	285	spinotelenchephalic pathway	#DIV/0!	#DIV/0!	#DIV/0!	#DIV/0!	#DIV/0!	#DIV/0!	#DIV/0!	#DIV/0!	#DIV/0!	#DIV/0!	#DIV/0!	#DIV/0!	#DIV/0!	#DIV/0!	#DIV/0!	#DIV/0!	#DIV/0!	#DIV/0!	#DIV/0!	#DIV/0!	#DIV/0!	#DIV/0!	#DIV/0!	#DIV/0!	#DIV/0!	#DIV/0!	#DIV/0!	#DIV/0!
1172	fiber tracts	cm	hht	627	hypothalamohypophysial tract	#DIV/0!	#DIV/0!	#DIV/0!	#DIV/0!	#DIV/0!	#DIV/0!	#DIV/0!	#DIV/0!	#DIV/0!	#DIV/0!	#DIV/0!	#DIV/0!	#DIV/0!	#DIV/0!	#DIV/0!	#DIV/0!	#DIV/0!	#DIV/0!	#DIV/0!	#DIV/0!	#DIV/0!	#DIV/0!	#DIV/0!	#DIV/0!	#DIV/0!	#DIV/0!	#DIV/0!	#DIV/0!
1173	fiber tracts	cbf	cbf	960	cerebellum related fiber tracts	#DIV/0!	#DIV/0!	#DIV/0!	#DIV/0!	#DIV/0!	#DIV/0!	#DIV/0!	#DIV/0!	#DIV/0!	#DIV/0!	#DIV/0!	#DIV/0!	#DIV/0!	#DIV/0!	#DIV/0!	#DIV/0!	#DIV/0!	#DIV/0!	#DIV/0!	#DIV/0!	#DIV/0!	#DIV/0!	#DIV/0!	#DIV/0!	#DIV/0!	#DIV/0!	#DIV/0!	#DIV/0!
1174	fiber tracts	cbf	cbc	744	cerebellar commissure	0.0108912	0.0102553	#DIV/0!	0.0053111	#DIV/0!	0.0242631	#DIV/0!	#DIV/0!	#DIV/0!	#DIV/0!	#DIV/0!	#DIV/0!	#DIV/0!	#DIV/0!	#DIV/0!	0.000236352	#DIV/0!	#DIV/0!	#DIV/0!	#DIV/0!	#DIV/0!	#DIV/0!	#DIV/0!	0.0291846	#DIV/0!	#DIV/0!	#DIV/0!	#DIV/0!
1175	fiber tracts	cbf	cbp	752	cerebellar peduncles	#DIV/0!	#DIV/0!	#DIV/0!	#DIV/0!	#DIV/0!	#DIV/0!	#DIV/0!	#DIV/0!	#DIV/0!	#DIV/0!	#DIV/0!	#DIV/0!	#DIV/0!	#DIV/0!	#DIV/0!	#DIV/0!	#DIV/0!	#DIV/0!	#DIV/0!	#DIV/0!	#DIV/0!	#DIV/0!	#DIV/0!	#DIV/0!	#DIV/0!	#DIV/0!	#DIV/0!	#DIV/0!
1176	fiber tracts	cbf	scp	326	superior cerebelar peduncles	0.00890895	0.0198515	0.0239914	0.0219096	0.051647	0.0447834	0.0541423	0.0506631	0.0772232	0.0793796	0.0616879	0.0929539	0.00164529	0.000826888	0.00108807	0.000829236	0.0124816	0.00864993	0.011412	0.013595	0.0159047	0.0163354	0.013351	0.0271347	0.0268944	0.0272183	0.0223327	0.0263344
1177	fiber tracts	cbf	dscp	812	superior cerebellar peduncle decussation	0.0026972	#DIV/0!	#DIV/0!	#DIV/0!	#DIV/0!	#DIV/0!	#DIV/0!	#DIV/0!	#DIV/0!	#DIV/0!	#DIV/0!	#DIV/0!	#DIV/0!	#DIV/0!	#DIV/0!	#DIV/0!	#DIV/0!	#DIV/0!	#DIV/0!	#DIV/0!	#DIV/0!	#DIV/0!	#DIV/0!	#DIV/0!	#DIV/0!	#DIV/0!	#DIV/0!	#DIV/0!
1178	fiber tracts	cbf	sct	85	spinocerebellar tract	#DIV/0!	#DIV/0!	#DIV/0!	#DIV/0!	#DIV/0!	#DIV/0!	#DIV/0!	#DIV/0!	#DIV/0!	#DIV/0!	#DIV/0!	#DIV/0!	#DIV/0!	#DIV/0!	#DIV/0!	#DIV/0!	#DIV/0!	#DIV/0!	#DIV/0!	#DIV/0!	#DIV/0!	#DIV/0!	#DIV/0!	#DIV/0!	#DIV/0!	#DIV/0!	#DIV/0!	#DIV/0!
1179	fiber tracts	cbf	uf	850	uncinate fascicle	0.00607472	0.0230812	0.0278368	0.0179411	0.0362301	0.050925	0.0266928	0.0352517	0.0480808	0.055969	0.0503183	0.0612249	0.00469356	#DIV/0!	#DIV/0!	#DIV/0!	0.0159421	0.00582408	0.0102542	0.0120583	0.00923262	0.00570093	0.00876869	0.0103977	0.014706	0.00864936	0.00991635	0.0141216
1180	fiber tracts	cbf	sctv	866	ventral spinocerebellar tract	0.00709543	0.00887527	0.00939833	0.022237	0.0346908	0.0102524	0.0234259	0.0358704	0.0164133	#DIV/0!	0.0317595	0.0466198	#DIV/0!	#DIV/0!	#DIV/0!	0.00459173	0.00324482	0.0198598	0.00572574	#DIV/0!	0.0125636	0.00984368	0.00563215	0.00689435	0.0083035	0.0100561	0.0150971	0.0598101
1181	fiber tracts	cbf	mcp	78	middle cerebellar peduncle	0.0178069	0.0249542	0.00795604	0.0183509	0.0209233	#DIV/0!	0.0061344	0.00675267	#DIV/0!	#DIV/0!	0.0150442	0.0155161	#DIV/0!	0.00118659	#DIV/0!	#DIV/0!	#DIV/0!	0.0175623	0.0120202	#DIV/0!	0.0227818	0.00653007	#DIV/0!	0.0139345	0.0142467	0.0124671	#DIV/0!	0.00829459
1182	fiber tracts	cbf	icp	1123	inferior cerebellar peduncle	#DIV/0!	#DIV/0!	#DIV/0!	#DIV/0!	#DIV/0!	#DIV/0!	#DIV/0!	#DIV/0!	#DIV/0!	#DIV/0!	#DIV/0!	#DIV/0!	#DIV/0!	#DIV/0!	#DIV/0!	#DIV/0!	#DIV/0!	#DIV/0!	#DIV/0!	#DIV/0!	#DIV/0!	#DIV/0!	#DIV/0!	#DIV/0!	#DIV/0!	#DIV/0!	#DIV/0!	#DIV/0!
1183	fiber tracts	cbf	sctd	553	dorsal spinocerebellar tract	#DIV/0!	#DIV/0!	#DIV/0!	#DIV/0!	#DIV/0!	#DIV/0!	#DIV/0!	#DIV/0!	#DIV/0!	#DIV/0!	#DIV/0!	#DIV/0!	#DIV/0!	#DIV/0!	#DIV/0!	#DIV/0!	#DIV/0!	#DIV/0!	#DIV/0!	#DIV/0!	#DIV/0!	#DIV/0!	#DIV/0!	#DIV/0!	#DIV/0!	#DIV/0!	#DIV/0!	#DIV/0!
1184	fiber tracts	cbf	cct	499	cuneocerebellar tract	#DIV/0!	#DIV/0!	#DIV/0!	#DIV/0!	#DIV/0!	#DIV/0!	#DIV/0!	#DIV/0!	#DIV/0!	#DIV/0!	#DIV/0!	#DIV/0!	#DIV/0!	#DIV/0!	#DIV/0!	#DIV/0!	#DIV/0!	#DIV/0!	#DIV/0!	#DIV/0!	#DIV/0!	#DIV/0!	#DIV/0!	#DIV/0!	#DIV/0!	#DIV/0!	#DIV/0!	#DIV/0!
1185	fiber tracts	cbf	jrb	650	juxtarestiform body	#DIV/0!	#DIV/0!	#DIV/0!	#DIV/0!	#DIV/0!	#DIV/0!	#DIV/0!	#DIV/0!	#DIV/0!	#DIV/0!	#DIV/0!	#DIV/0!	#DIV/0!	#DIV/0!	#DIV/0!	#DIV/0!	#DIV/0!	#DIV/0!	#DIV/0!	#DIV/0!	#DIV/0!	#DIV/0!	#DIV/0!	#DIV/0!	#DIV/0!	#DIV/0!	#DIV/0!	#DIV/0!
1186	fiber tracts	cbf	bct	490	bulbocerebellar tract	#DIV/0!	#DIV/0!	#DIV/0!	#DIV/0!	#DIV/0!	#DIV/0!	#DIV/0!	#DIV/0!	#DIV/0!	#DIV/0!	#DIV/0!	#DIV/0!	#DIV/0!	#DIV/0!	#DIV/0!	#DIV/0!	#DIV/0!	#DIV/0!	#DIV/0!	#DIV/0!	#DIV/0!	#DIV/0!	#DIV/0!	#DIV/0!	#DIV/0!	#DIV/0!	#DIV/0!	#DIV/0!
1187	fiber tracts	cbf	oct	404	olivocerebellar tract	#DIV/0!	#DIV/0!	#DIV/0!	#DIV/0!	#DIV/0!	#DIV/0!	#DIV/0!	#DIV/0!	#DIV/0!	#DIV/0!	#DIV/0!	#DIV/0!	#DIV/0!	#DIV/0!	#DIV/0!	#DIV/0!	#DIV/0!	#DIV/0!	#DIV/0!	#DIV/0!	#DIV/0!	#DIV/0!	#DIV/0!	#DIV/0!	#DIV/0!	#DIV/0!	#DIV/0!	#DIV/0!
1188	fiber tracts	cbf	rct	410	reticulocerebellar tract	#DIV/0!	#DIV/0!	#DIV/0!	#DIV/0!	#DIV/0!	#DIV/0!	#DIV/0!	#DIV/0!	#DIV/0!	#DIV/0!	#DIV/0!	#DIV/0!	#DIV/0!	#DIV/0!	#DIV/0!	#DIV/0!	#DIV/0!	#DIV/0!	#DIV/0!	#DIV/0!	#DIV/0!	#DIV/0!	#DIV/0!	#DIV/0!	#DIV/0!	#DIV/0!	#DIV/0!	#DIV/0!
1189	fiber tracts	cbf	tct	373	trigeminocerebellar tract	#DIV/0!	#DIV/0!	#DIV/0!	#DIV/0!	#DIV/0!	#DIV/0!	#DIV/0!	#DIV/0!	#DIV/0!	#DIV/0!	#DIV/0!	#DIV/0!	#DIV/0!	#DIV/0!	#DIV/0!	#DIV/0!	#DIV/0!	#DIV/0!	#DIV/0!	#DIV/0!	#DIV/0!	#DIV/0!	#DIV/0!	#DIV/0!	#DIV/0!	#DIV/0!	#DIV/0!	#DIV/0!
1190	fiber tracts	cbf	arb	728	arbor vitae	0.00451252	0.0103864	0.00824787	0.00803969	0.0288969	0.0241497	0.0243816	0.0371324	0.455669	0.0724471	0.0559937	0.0828959	0.000742108	0.000386033	0.000957868	0.00048404	0.00393724	0.00355911	0.00280075	0.0045931	0.00382393	0.00428285	0.0035415	0.00817282	0.00750068	0.00790147	0.0103305	0.00797629
1191	fiber tracts	scwm	scwm	484682512	supra-callosal cerebral white matter	#DIV/0!	#DIV/0!	#DIV/0!	#DIV/0!	#DIV/0!	#DIV/0!	0.0180755	#DIV/0!	#DIV/0!	#DIV/0!	#DIV/0!	#DIV/0!	#DIV/0!	#DIV/0!	#DIV/0!	#DIV/0!	#DIV/0!	#DIV/0!	#DIV/0!	#DIV/0!	0.00294177	0.00925502	#DIV/0!	#DIV/0!	#DIV/0!	#DIV/0!	#DIV/0!	#DIV/0!
1192	fiber tracts	lfbs	lfbs	983	lateral forebrain bundle system	#DIV/0!	#DIV/0!	#DIV/0!	#DIV/0!	#DIV/0!	#DIV/0!	#DIV/0!	#DIV/0!	#DIV/0!	#DIV/0!	#DIV/0!	#DIV/0!	#DIV/0!	#DIV/0!	#DIV/0!	#DIV/0!	#DIV/0!	#DIV/0!	#DIV/0!	#DIV/0!	#DIV/0!	#DIV/0!	#DIV/0!	#DIV/0!	#DIV/0!	#DIV/0!	#DIV/0!	#DIV/0!
1193	fiber tracts	lfbs	cc	776	corpus callosum	#DIV/0!	#DIV/0!	#DIV/0!	#DIV/0!	#DIV/0!	#DIV/0!	#DIV/0!	#DIV/0!	#DIV/0!	#DIV/0!	#DIV/0!	#DIV/0!	#DIV/0!	#DIV/0!	#DIV/0!	#DIV/0!	#DIV/0!	#DIV/0!	#DIV/0!	#DIV/0!	#DIV/0!	#DIV/0!	#DIV/0!	#DIV/0!	#DIV/0!	#DIV/0!	#DIV/0!	#DIV/0!
1194	fiber tracts	lfbs	fa	956	corpus callosum, anterior forceps	0.0104202	0.0144966	0.00875048	0.00948394	0.0278588	0.0133566	0.0286922	0.0189885	0.0375734	0.034331	0.0421232	0.0482759	0.000563401	0.000808156	0.00048285	0.000671908	0.00369308	0.0037955	0.00389192	0.00666745	0.00589777	0.00583043	0.0059147	0.00602376	0.00795273	0.0054517	0.00893821	0.00886495
1195	fiber tracts	lfbs	ec	579	external capsule	#DIV/0!	#DIV/0!	#DIV/0!	#DIV/0!	#DIV/0!	#DIV/0!	0.0814189	#DIV/0!	#DIV/0!	#DIV/0!	#DIV/0!	#DIV/0!	#DIV/0!	#DIV/0!	#DIV/0!	#DIV/0!	#DIV/0!	#DIV/0!	#DIV/0!	#DIV/0!	0.0189518	0.0817308	#DIV/0!	#DIV/0!	#DIV/0!	#DIV/0!	#DIV/0!	#DIV/0!
1196	fiber tracts	lfbs	ee	964	corpus callosum, extreme capsule	#DIV/0!	#DIV/0!	#DIV/0!	#DIV/0!	#DIV/0!	#DIV/0!	#DIV/0!	#DIV/0!	#DIV/0!	#DIV/0!	#DIV/0!	#DIV/0!	#DIV/0!	#DIV/0!	#DIV/0!	#DIV/0!	#DIV/0!	#DIV/0!	#DIV/0!	#DIV/0!	#DIV/0!	#DIV/0!	#DIV/0!	#DIV/0!	#DIV/0!	#DIV/0!	#DIV/0!	#DIV/0!
1197	fiber tracts	lfbs	ccg	1108	genu of corpus callosum	0.00456509	0.0104114	0.00683332	0.00645277	0.0185043	0.0147648	0.0249466	0.00649895	0.0287687	0.0264218	0.0308708	0.0465772	0.000471275	0.000343321	0.00024674	0.00027639	0.00165034	0.00242342	0.00319974	0.0036364	0.00415233	0.00338652	0.00506136	0.00567969	0.00672487	0.00505798	0.00673439	0.00536295
1198	fiber tracts	lfbs	fp	971	corpus callosum, posterior forceps	0.00581578	0.0101557	0.0135578	0.00833362	0.0237256	0.0275718	0.0307327	0.012177	0.0403285	0.046677	0.0419867	0.0598867	0.0019025	0.000545819	0.0012248	0.000706451	0.00645838	0.0064245	0.00612464	0.00509874	0.00598153	0.00641036	0.00804919	0.0063289	0.0102008	0.0091449	0.0111601	0.00942821
1199	fiber tracts	lfbs	ccr	979	corpus callosum, rostrum	#DIV/0!	#DIV/0!	#DIV/0!	#DIV/0!	#DIV/0!	#DIV/0!	#DIV/0!	#DIV/0!	#DIV/0!	#DIV/0!	#DIV/0!	#DIV/0!	#DIV/0!	#DIV/0!	#DIV/0!	#DIV/0!	#DIV/0!	#DIV/0!	#DIV/0!	#DIV/0!	#DIV/0!	#DIV/0!	#DIV/0!	#DIV/0!	#DIV/0!	#DIV/0!	#DIV/0!	#DIV/0!
1200	fiber tracts	lfbs	ccb	484682516	corpus callosum, body	0.00495039	0.00929231	0.00861834	0.0083296	0.0229053	0.0173964	0.0251334	0.00732379	0.0846177	0.0341963	0.031788	0.0444977	0.000546926	0.000395255	0.000954448	0.000216745	0.00319613	0.00388227	0.00325034	0.00338764	0.00386221	0.00376125	0.00465433	0.00538206	0.00633788	0.0059363	0.00799976	0.00643334
1201	fiber tracts	lfbs	ccs	986	corpus callosum, splenium	0.00377409	0.010353	0.0076921	0.00656443	0.0276331	0.0196404	0.0250938	0.0137742	0.0333009	0.0432849	0.0330374	0.0498417	0.000808966	0.000379974	0.000639028	0.000565332	0.00432675	0.00289757	0.00351729	0.00492091	0.00424695	0.00437463	0.00453414	0.00470606	0.00554225	0.00634847	0.00715689	0.00707173
1202	fiber tracts	lfbs	cst	784	corticospinal tract	0.0285223	0.0267311	0.00642009	0.0112668	0.0261546	0.0236034	0.047638	0.0137459	0.0262481	0.0532345	0.0507201	0.0475731	0.000203399	0.00257881	0.000637582	0.000418241	0.0065495	0.0050719	0.00911244	0.0264551	#DIV/0!	0.0100457	0.0267211	0.00655877	0.0128828	0.0311728	0.0161933	0.0166376
1203	fiber tracts	lfbs	int	6	internal capsule	#DIV/0!	#DIV/0!	#DIV/0!	#DIV/0!	0.0572134	#DIV/0!	0.0258394	#DIV/0!	0.134454	#DIV/0!	#DIV/0!	#DIV/0!	#DIV/0!	#DIV/0!	#DIV/0!	#DIV/0!	#DIV/0!	#DIV/0!	#DIV/0!	#DIV/0!	0.01664	0.0214196	#DIV/0!	0.0518171	0.0356682	#DIV/0!	#DIV/0!	#DIV/0!
1204	fiber tracts	lfbs	cpd	924	cerebal peduncle	0.00929155	0.00956218	0.00267125	0.00596411	0.0104811	0.00751576	0.019646	0.00723682	0.0126654	0.0124104	0.0198932	0.0308397	0.000781181	#DIV/0!	0.000462516	0.000228523	0.00137167	0.00276748	0.00815569	0.00390677	0.00583042	0.00510697	0.00694901	0.00595541	0.00493482	0.00600824	0.00518833	0.0105564
1205	fiber tracts	lfbs	cte	1036	corticotectal tract	#DIV/0!	#DIV/0!	#DIV/0!	#DIV/0!	#DIV/0!	#DIV/0!	#DIV/0!	#DIV/0!	#DIV/0!	#DIV/0!	#DIV/0!	#DIV/0!	#DIV/0!	#DIV/0!	#DIV/0!	#DIV/0!	#DIV/0!	#DIV/0!	#DIV/0!	#DIV/0!	#DIV/0!	#DIV/0!	#DIV/0!	#DIV/0!	#DIV/0!	#DIV/0!	#DIV/0!	#DIV/0!
1206	fiber tracts	lfbs	crt	1012	corticorubral tract	#DIV/0!	#DIV/0!	#DIV/0!	#DIV/0!	#DIV/0!	#DIV/0!	#DIV/0!	#DIV/0!	#DIV/0!	#DIV/0!	#DIV/0!	#DIV/0!	#DIV/0!	#DIV/0!	#DIV/0!	#DIV/0!	#DIV/0!	#DIV/0!	#DIV/0!	#DIV/0!	#DIV/0!	#DIV/0!	#DIV/0!	#DIV/0!	#DIV/0!	#DIV/0!	#DIV/0!	#DIV/0!
1207	fiber tracts	lfbs	cpt	1003	corticopontine tract	#DIV/0!	#DIV/0!	#DIV/0!	#DIV/0!	#DIV/0!	#DIV/0!	#DIV/0!	#DIV/0!	#DIV/0!	#DIV/0!	#DIV/0!	#DIV/0!	#DIV/0!	#DIV/0!	#DIV/0!	#DIV/0!	#DIV/0!	#DIV/0!	#DIV/0!	#DIV/0!	#DIV/0!	#DIV/0!	#DIV/0!	#DIV/0!	#DIV/0!	#DIV/0!	#DIV/0!	#DIV/0!
1208	fiber tracts	lfbs	cbt	994	corticobulbar tract	#DIV/0!	#DIV/0!	#DIV/0!	#DIV/0!	#DIV/0!	#DIV/0!	#DIV/0!	#DIV/0!	#DIV/0!	#DIV/0!	#DIV/0!	#DIV/0!	#DIV/0!	#DIV/0!	#DIV/0!	#DIV/0!	#DIV/0!	#DIV/0!	#DIV/0!	#DIV/0!	#DIV/0!	#DIV/0!	#DIV/0!	#DIV/0!	#DIV/0!	#DIV/0!	#DIV/0!	#DIV/0!
1209	fiber tracts	lfbs	py	190	pyramid	0.00330714	0.0175969	0.0129642	0.0133881	0.0401244	0.00573993	0.0650229	0.0225049	0.0142873	0.0515325	0.0345221	0.092171	0.00112526	0.000154692	0.000359281	0.000182447	0.00106524	0.00450281	0.00278556	0.00488438	#DIV/0!	0.0005119	0.00336987	0.00239223	0.00391156	0.00666147	0.0166106	0.0190039
1210	fiber tracts	lfbs	pyd	198	pyramidal decussation	#DIV/0!	#DIV/0!	#DIV/0!	#DIV/0!	#DIV/0!	#DIV/0!	#DIV/0!	#DIV/0!	#DIV/0!	#DIV/0!	#DIV/0!	#DIV/0!	#DIV/0!	#DIV/0!	#DIV/0!	#DIV/0!	#DIV/0!	#DIV/0!	#DIV/0!	#DIV/0!	#DIV/0!	#DIV/0!	#DIV/0!	#DIV/0!	#DIV/0!	#DIV/0!	#DIV/0!	#DIV/0!
1211	fiber tracts	lfbs	cstc	1019	corticospinal tract, crossed	#DIV/0!	#DIV/0!	#DIV/0!	#DIV/0!	#DIV/0!	#DIV/0!	#DIV/0!	#DIV/0!	#DIV/0!	#DIV/0!	#DIV/0!	#DIV/0!	#DIV/0!	#DIV/0!	#DIV/0!	#DIV/0!	#DIV/0!	#DIV/0!	#DIV/0!	#DIV/0!	#DIV/0!	#DIV/0!	#DIV/0!	#DIV/0!	#DIV/0!	#DIV/0!	#DIV/0!	#DIV/0!
1212	fiber tracts	lfbs	cstu	1028	corticospinal tract, uncrossed	#DIV/0!	#DIV/0!	#DIV/0!	#DIV/0!	#DIV/0!	#DIV/0!	#DIV/0!	#DIV/0!	#DIV/0!	#DIV/0!	#DIV/0!	#DIV/0!	#DIV/0!	#DIV/0!	#DIV/0!	#DIV/0!	#DIV/0!	#DIV/0!	#DIV/0!	#DIV/0!	#DIV/0!	#DIV/0!	#DIV/0!	#DIV/0!	#DIV/0!	#DIV/0!	#DIV/0!	#DIV/0!
1213	fiber tracts	lfbs	lfbst	896	thalamus related	#DIV/0!	#DIV/0!	#DIV/0!	#DIV/0!	#DIV/0!	#DIV/0!	#DIV/0!	#DIV/0!	#DIV/0!	#DIV/0!	#DIV/0!	#DIV/0!	#DIV/0!	#DIV/0!	#DIV/0!	#DIV/0!	#DIV/0!	#DIV/0!	#DIV/0!	#DIV/0!	#DIV/0!	#DIV/0!	#DIV/0!	#DIV/0!	#DIV/0!	#DIV/0!	#DIV/0!	#DIV/0!
1214	fiber tracts	lfbs	em	1092	external medullary lamina of the thalamus	#DIV/0!	#DIV/0!	#DIV/0!	#DIV/0!	#DIV/0!	#DIV/0!	0.0648497	#DIV/0!	#DIV/0!	#DIV/0!	#DIV/0!	#DIV/0!	#DIV/0!	#DIV/0!	#DIV/0!	#DIV/0!	#DIV/0!	#DIV/0!	#DIV/0!	#DIV/0!	0.0197987	0.0147889	#DIV/0!	#DIV/0!	#DIV/0!	#DIV/0!	#DIV/0!	#DIV/0!
1215	fiber tracts	lfbs	im	14	internal medullary lamina of the thalamus	#DIV/0!	#DIV/0!	#DIV/0!	#DIV/0!	#DIV/0!	#DIV/0!	#DIV/0!	#DIV/0!	#DIV/0!	#DIV/0!	#DIV/0!	#DIV/0!	#DIV/0!	#DIV/0!	#DIV/0!	#DIV/0!	#DIV/0!	#DIV/0!	#DIV/0!	#DIV/0!	#DIV/0!	#DIV/0!	#DIV/0!	#DIV/0!	#DIV/0!	#DIV/0!	#DIV/0!	#DIV/0!
1216	fiber tracts	lfbs	mtc	86	middle thalamic commissure	#DIV/0!	#DIV/0!	#DIV/0!	#DIV/0!	#DIV/0!	#DIV/0!	#DIV/0!	#DIV/0!	#DIV/0!	#DIV/0!	#DIV/0!	#DIV/0!	#DIV/0!	#DIV/0!	#DIV/0!	#DIV/0!	#DIV/0!	#DIV/0!	#DIV/0!	#DIV/0!	#DIV/0!	#DIV/0!	#DIV/0!	#DIV/0!	#DIV/0!	#DIV/0!	#DIV/0!	#DIV/0!
1217	fiber tracts	lfbs	tp	365	thalamic peduncles	#DIV/0!	#DIV/0!	#DIV/0!	#DIV/0!	#DIV/0!	#DIV/0!	#DIV/0!	#DIV/0!	#DIV/0!	#DIV/0!	#DIV/0!	#DIV/0!	#DIV/0!	#DIV/0!	#DIV/0!	#DIV/0!	#DIV/0!	#DIV/0!	#DIV/0!	#DIV/0!	#DIV/0!	#DIV/0!	#DIV/0!	#DIV/0!	#DIV/0!	#DIV/0!	#DIV/0!	#DIV/0!
1218	fiber tracts	lfbs	or	484682520	optic radiation	#DIV/0!	#DIV/0!	#DIV/0!	#DIV/0!	#DIV/0!	#DIV/0!	#DIV/0!	#DIV/0!	#DIV/0!	#DIV/0!	#DIV/0!	#DIV/0!	#DIV/0!	#DIV/0!	#DIV/0!	#DIV/0!	#DIV/0!	#DIV/0!	#DIV/0!	#DIV/0!	#DIV/0!	#DIV/0!	#DIV/0!	#DIV/0!	#DIV/0!	#DIV/0!	#DIV/0!	#DIV/0!
1219	fiber tracts	lfbs	ar	484682524	auditory radiation	#DIV/0!	#DIV/0!	#DIV/0!	#DIV/0!	#DIV/0!	#DIV/0!	#DIV/0!	#DIV/0!	#DIV/0!	#DIV/0!	#DIV/0!	#DIV/0!	#DIV/0!	#DIV/0!	#DIV/0!	#DIV/0!	#DIV/0!	#DIV/0!	#DIV/0!	#DIV/0!	#DIV/0!	#DIV/0!	#DIV/0!	#DIV/0!	#DIV/0!	#DIV/0!	#DIV/0!	#DIV/0!
1220	fiber tracts	eps	eps	1000	extrapyramidal fiber systems	#DIV/0!	#DIV/0!	#DIV/0!	#DIV/0!	#DIV/0!	#DIV/0!	#DIV/0!	#DIV/0!	#DIV/0!	#DIV/0!	#DIV/0!	#DIV/0!	#DIV/0!	#DIV/0!	#DIV/0!	#DIV/0!	#DIV/0!	#DIV/0!	#DIV/0!	#DIV/0!	#DIV/0!	#DIV/0!	#DIV/0!	#DIV/0!	#DIV/0!	#DIV/0!	#DIV/0!	#DIV/0!
1221	fiber tracts	eps	epsc	760	cerebral nuclei related	#DIV/0!	#DIV/0!	#DIV/0!	#DIV/0!	#DIV/0!	#DIV/0!	#DIV/0!	#DIV/0!	#DIV/0!	#DIV/0!	#DIV/0!	#DIV/0!	#DIV/0!	#DIV/0!	#DIV/0!	#DIV/0!	#DIV/0!	#DIV/0!	#DIV/0!	#DIV/0!	#DIV/0!	#DIV/0!	#DIV/0!	#DIV/0!	#DIV/0!	#DIV/0!	#DIV/0!	#DIV/0!
1222	fiber tracts	eps	pap	142	pallidothalamic pathway	#DIV/0!	#DIV/0!	#DIV/0!	#DIV/0!	#DIV/0!	#DIV/0!	#DIV/0!	#DIV/0!	#DIV/0!	#DIV/0!	#DIV/0!	#DIV/0!	#DIV/0!	#DIV/0!	#DIV/0!	#DIV/0!	#DIV/0!	#DIV/0!	#DIV/0!	#DIV/0!	#DIV/0!	#DIV/0!	#DIV/0!	#DIV/0!	#DIV/0!	#DIV/0!	#DIV/0!	#DIV/0!
1223	fiber tracts	eps	nst	102	nigrostriatal tract	#DIV/0!	#DIV/0!	#DIV/0!	#DIV/0!	#DIV/0!	#DIV/0!	0.0698269	#DIV/0!	#DIV/0!	#DIV/0!	#DIV/0!	#DIV/0!	#DIV/0!	#DIV/0!	#DIV/0!	#DIV/0!	#DIV/0!	#DIV/0!	#DIV/0!	#DIV/0!	0.0227155	0.0334178	#DIV/0!	#DIV/0!	#DIV/0!	#DIV/0!	#DIV/0!	#DIV/0!
1224	fiber tracts	eps	ntt	109	nigrothalamic fibers	#DIV/0!	#DIV/0!	#DIV/0!	#DIV/0!	#DIV/0!	#DIV/0!	#DIV/0!	#DIV/0!	#DIV/0!	#DIV/0!	#DIV/0!	#DIV/0!	#DIV/0!	#DIV/0!	#DIV/0!	#DIV/0!	#DIV/0!	#DIV/0!	#DIV/0!	#DIV/0!	#DIV/0!	#DIV/0!	#DIV/0!	#DIV/0!	#DIV/0!	#DIV/0!	#DIV/0!	#DIV/0!
1225	fiber tracts	eps	ptf	134	pallidotegmental fascicle	#DIV/0!	#DIV/0!	#DIV/0!	#DIV/0!	#DIV/0!	#DIV/0!	#DIV/0!	#DIV/0!	#DIV/0!	#DIV/0!	#DIV/0!	#DIV/0!	#DIV/0!	#DIV/0!	#DIV/0!	#DIV/0!	#DIV/0!	#DIV/0!	#DIV/0!	#DIV/0!	#DIV/0!	#DIV/0!	#DIV/0!	#DIV/0!	#DIV/0!	#DIV/0!	#DIV/0!	#DIV/0!
1226	fiber tracts	eps	snp	309	striatonigral pathway	#DIV/0!	#DIV/0!	#DIV/0!	#DIV/0!	#DIV/0!	#DIV/0!	#DIV/0!	#DIV/0!	#DIV/0!	#DIV/0!	#DIV/0!	#DIV/0!	#DIV/0!	#DIV/0!	#DIV/0!	#DIV/0!	#DIV/0!	#DIV/0!	#DIV/0!	#DIV/0!	#DIV/0!	#DIV/0!	#DIV/0!	#DIV/0!	#DIV/0!	#DIV/0!	#DIV/0!	#DIV/0!
1227	fiber tracts	eps	stf	317	subthalamic fascicle	#DIV/0!	#DIV/0!	#DIV/0!	#DIV/0!	#DIV/0!	#DIV/0!	#DIV/0!	#DIV/0!	#DIV/0!	#DIV/0!	#DIV/0!	#DIV/0!	#DIV/0!	#DIV/0!	#DIV/0!	#DIV/0!	#DIV/0!	#DIV/0!	#DIV/0!	#DIV/0!	#DIV/0!	#DIV/0!	#DIV/0!	#DIV/0!	#DIV/0!	#DIV/0!	#DIV/0!	#DIV/0!
1228	fiber tracts	eps	tsp	877	tectospinal pathway	#DIV/0!	#DIV/0!	#DIV/0!	#DIV/0!	#DIV/0!	#DIV/0!	#DIV/0!	#DIV/0!	#DIV/0!	#DIV/0!	#DIV/0!	#DIV/0!	#DIV/0!	#DIV/0!	#DIV/0!	#DIV/0!	#DIV/0!	#DIV/0!	#DIV/0!	#DIV/0!	#DIV/0!	#DIV/0!	#DIV/0!	#DIV/0!	#DIV/0!	#DIV/0!	#DIV/0!	#DIV/0!
1229	fiber tracts	eps	tspd	1051	direct tectospinal pathway	#DIV/0!	#DIV/0!	#DIV/0!	#DIV/0!	#DIV/0!	#DIV/0!	#DIV/0!	#DIV/0!	#DIV/0!	#DIV/0!	#DIV/0!	#DIV/0!	#DIV/0!	#DIV/0!	#DIV/0!	#DIV/0!	#DIV/0!	#DIV/0!	#DIV/0!	#DIV/0!	#DIV/0!	#DIV/0!	#DIV/0!	#DIV/0!	#DIV/0!	#DIV/0!	#DIV/0!	#DIV/0!
1230	fiber tracts	eps	dtd	1060	doral tegmental decussation	0.00814744	#DIV/0!	#DIV/0!	#DIV/0!	#DIV/0!	#DIV/0!	#DIV/0!	#DIV/0!	#DIV/0!	#DIV/0!	#DIV/0!	#DIV/0!	#DIV/0!	#DIV/0!	#DIV/0!	#DIV/0!	#DIV/0!	#DIV/0!	#DIV/0!	#DIV/0!	#DIV/0!	#DIV/0!	#DIV/0!	#DIV/0!	#DIV/0!	#DIV/0!	#DIV/0!	#DIV/0!
1231	fiber tracts	eps	tspc	1043	crossed tectospinal pathway	0.0107599	0.0173322	0.0147616	0.0135073	#DIV/0!	0.042465	#DIV/0!	#DIV/0!	#DIV/0!	#DIV/0!	0.0459279	0.0666097	0.000703047	0.00111823	#DIV/0!	0.000177332	0.00520868	0.00856104	#DIV/0!	0.019877	#DIV/0!	#DIV/0!	#DIV/0!	0.0139225	#DIV/0!	0.0218614	0.0185668	0.0122438
1232	fiber tracts	eps	rust	863	rubrospinal tract	0.00911823	0.0134597	0.0140289	0.0182299	0.0434844	0.0387496	0.0490136	0.0359285	0.0544378	0.0752772	0.065462	0.0606777	0.000687996	0.00102075	0.000514913	0.00209215	0.0107696	0.00926129	0.00851937	0.0143861	0.0158172	0.0139092	0.0149104	0.0141263	0.014291	0.0163578	0.0309068	0.013811
1233	fiber tracts	eps	vtd	397	ventral tegmental decussation	0.0099746	#DIV/0!	#DIV/0!	#DIV/0!	#DIV/0!	#DIV/0!	#DIV/0!	#DIV/0!	#DIV/0!	#DIV/0!	#DIV/0!	#DIV/0!	#DIV/0!	#DIV/0!	#DIV/0!	#DIV/0!	#DIV/0!	#DIV/0!	#DIV/0!	#DIV/0!	#DIV/0!	#DIV/0!	#DIV/0!	#DIV/0!	#DIV/0!	#DIV/0!	#DIV/0!	#DIV/0!
1234	fiber tracts	eps	rrt	221	rubroreticular tract	#DIV/0!	#DIV/0!	#DIV/0!	#DIV/0!	#DIV/0!	#DIV/0!	#DIV/0!	#DIV/0!	#DIV/0!	#DIV/0!	#DIV/0!	#DIV/0!	#DIV/0!	#DIV/0!	#DIV/0!	#DIV/0!	#DIV/0!	#DIV/0!	#DIV/0!	#DIV/0!	#DIV/0!	#DIV/0!	#DIV/0!	#DIV/0!	#DIV/0!	#DIV/0!	#DIV/0!	#DIV/0!
1235	fiber tracts	eps	ctb	736	central tegmental bundle	#DIV/0!	#DIV/0!	#DIV/0!	#DIV/0!	#DIV/0!	#DIV/0!	#DIV/0!	#DIV/0!	#DIV/0!	#DIV/0!	#DIV/0!	#DIV/0!	#DIV/0!	#DIV/0!	#DIV/0!	#DIV/0!	#DIV/0!	#DIV/0!	#DIV/0!	#DIV/0!	#DIV/0!	#DIV/0!	#DIV/0!	#DIV/0!	#DIV/0!	#DIV/0!	#DIV/0!	#DIV/0!
1236	fiber tracts	eps	rst	855	retriculospinal tract	#DIV/0!	#DIV/0!	#DIV/0!	#DIV/0!	#DIV/0!	#DIV/0!	#DIV/0!	#DIV/0!	#DIV/0!	#DIV/0!	#DIV/0!	#DIV/0!	#DIV/0!	#DIV/0!	#DIV/0!	#DIV/0!	#DIV/0!	#DIV/0!	#DIV/0!	#DIV/0!	#DIV/0!	#DIV/0!	#DIV/0!	#DIV/0!	#DIV/0!	#DIV/0!	#DIV/0!	#DIV/0!
1237	fiber tracts	eps	rstl	205	retriculospinal tract, lateral part	#DIV/0!	#DIV/0!	#DIV/0!	#DIV/0!	#DIV/0!	#DIV/0!	#DIV/0!	#DIV/0!	#DIV/0!	#DIV/0!	#DIV/0!	#DIV/0!	#DIV/0!	#DIV/0!	#DIV/0!	#DIV/0!	#DIV/0!	#DIV/0!	#DIV/0!	#DIV/0!	#DIV/0!	#DIV/0!	#DIV/0!	#DIV/0!	#DIV/0!	#DIV/0!	#DIV/0!	#DIV/0!
1238	fiber tracts	eps	rstm	213	retriculospinal tract, medial part	#DIV/0!	#DIV/0!	#DIV/0!	#DIV/0!	#DIV/0!	#DIV/0!	#DIV/0!	#DIV/0!	#DIV/0!	#DIV/0!	#DIV/0!	#DIV/0!	#DIV/0!	#DIV/0!	#DIV/0!	#DIV/0!	#DIV/0!	#DIV/0!	#DIV/0!	#DIV/0!	#DIV/0!	#DIV/0!	#DIV/0!	#DIV/0!	#DIV/0!	#DIV/0!	#DIV/0!	#DIV/0!
1239	fiber tracts	eps	vsp	941	vestibulospinal pathway	#DIV/0!	#DIV/0!	#DIV/0!	#DIV/0!	#DIV/0!	#DIV/0!	#DIV/0!	#DIV/0!	#DIV/0!	#DIV/0!	#DIV/0!	#DIV/0!	#DIV/0!	#DIV/0!	#DIV/0!	#DIV/0!	#DIV/0!	#DIV/0!	#DIV/0!	#DIV/0!	#DIV/0!	#DIV/0!	#DIV/0!	#DIV/0!	#DIV/0!	#DIV/0!	#DIV/0!	#DIV/0!
1240	fiber tracts	mfbs	mfbs	991	medial forebrain bundle system	#DIV/0!	#DIV/0!	#DIV/0!	#DIV/0!	#DIV/0!	#DIV/0!	#DIV/0!	#DIV/0!	#DIV/0!	#DIV/0!	#DIV/0!	#DIV/0!	#DIV/0!	#DIV/0!	#DIV/0!	#DIV/0!	#DIV/0!	#DIV/0!	#DIV/0!	#DIV/0!	#DIV/0!	#DIV/0!	#DIV/0!	#DIV/0!	#DIV/0!	#DIV/0!	#DIV/0!	#DIV/0!
1241	fiber tracts	mfbs	mfbc	768	cerebrum related	#DIV/0!	#DIV/0!	#DIV/0!	#DIV/0!	#DIV/0!	#DIV/0!	#DIV/0!	#DIV/0!	#DIV/0!	#DIV/0!	#DIV/0!	#DIV/0!	#DIV/0!	#DIV/0!	#DIV/0!	#DIV/0!	#DIV/0!	#DIV/0!	#DIV/0!	#DIV/0!	#DIV/0!	#DIV/0!	#DIV/0!	#DIV/0!	#DIV/0!	#DIV/0!	#DIV/0!	#DIV/0!
1242	fiber tracts	mfbs	amc	884	amygdalar capsule	#DIV/0!	#DIV/0!	#DIV/0!	#DIV/0!	#DIV/0!	#DIV/0!	#DIV/0!	#DIV/0!	#DIV/0!	#DIV/0!	#DIV/0!	#DIV/0!	#DIV/0!	#DIV/0!	#DIV/0!	#DIV/0!	#DIV/0!	#DIV/0!	#DIV/0!	#DIV/0!	#DIV/0!	#DIV/0!	#DIV/0!	#DIV/0!	#DIV/0!	#DIV/0!	#DIV/0!	#DIV/0!
1243	fiber tracts	mfbs	apd	892	ansa peduncularis	#DIV/0!	#DIV/0!	#DIV/0!	#DIV/0!	#DIV/0!	#DIV/0!	#DIV/0!	#DIV/0!	#DIV/0!	#DIV/0!	#DIV/0!	#DIV/0!	#DIV/0!	#DIV/0!	#DIV/0!	#DIV/0!	#DIV/0!	#DIV/0!	#DIV/0!	#DIV/0!	#DIV/0!	#DIV/0!	#DIV/0!	#DIV/0!	#DIV/0!	#DIV/0!	#DIV/0!	#DIV/0!
1244	fiber tracts	mfbs	act	908	anterior commissure, temporal limb	0.016685	0.0109971	0.0176816	0.00915657	0.0342731	0.0186905	0.0517072	0.0297024	0.0598482	0.0461946	0.0237787	0.0349956	0.000695938	0.000823803	#DIV/0!	0.00204715	0.00700018	0.00728448	0.00394714	0.00370201	0.0186221	0.0127779	0.0109794	0.0161976	0.0217278	0.0225801	0.0273027	0.023082
1245	fiber tracts	mfbs	cing	940	cingulum bundle	0.0117072	0.0178816	0.0184596	0.0194563	0.0355766	0.0275909	0.0376145	0.0189646	0.0402306	0.049307	0.0471104	0.0578147	0.000412845	0.000569513	0.000661076	0.000483604	0.0054051	0.00786499	0.00793864	0.00895382	0.00919513	0.0118384	0.00956507	0.0117144	0.0151193	0.0121368	0.01493	0.0157131
1246	fiber tracts	mfbs	fxs	1099	fornix system	#DIV/0!	#DIV/0!	#DIV/0!	#DIV/0!	#DIV/0!	#DIV/0!	#DIV/0!	#DIV/0!	#DIV/0!	#DIV/0!	#DIV/0!	#DIV/0!	#DIV/0!	#DIV/0!	#DIV/0!	#DIV/0!	#DIV/0!	#DIV/0!	#DIV/0!	#DIV/0!	#DIV/0!	#DIV/0!	#DIV/0!	#DIV/0!	#DIV/0!	#DIV/0!	#DIV/0!	#DIV/0!
1247	fiber tracts	mfbs	alv	466	alveus	0.00610141	0.0144912	0.00799842	0.0158062	0.0250899	0.0252258	0.0294087	0.0160782	0.0376742	0.0495089	0.0341887	0.0510752	0.00109166	0.00034964	0.0008001	0.000844699	0.00267557	0.00514278	0.00432501	0.00379106	0.00623743	0.00506682	0.00849417	0.00704166	0.00823989	0.0106088	0.00992356	0.00989941
1248	fiber tracts	mfbs	df	530	dorsal fornix	0.00878757	0.016895	#DIV/0!	0.0118797	#DIV/0!	0.0242496	#DIV/0!	#DIV/0!	#DIV/0!	#DIV/0!	#DIV/0!	#DIV/0!	#DIV/0!	#DIV/0!	#DIV/0!	#DIV/0!	#DIV/0!	#DIV/0!	#DIV/0!	#DIV/0!	#DIV/0!	#DIV/0!	#DIV/0!	#DIV/0!	#DIV/0!	#DIV/0!	#DIV/0!	#DIV/0!
1249	fiber tracts	mfbs	fi	603	fimbria	0.00536752	0.0096872	0.00607584	0.0064172	0.024373	0.0179062	0.0221337	0.012329	0.0382414	0.0309719	0.0209434	0.0454897	0.000535502	0.000294073	0.000444174	0.000799926	0.00269733	0.0045173	0.00446178	0.00316574	0.00627134	0.00505524	0.0074499	0.00621253	0.00851153	0.0101249	0.011853	0.00865691
1250	fiber tracts	mfbs	fxprg	745	precommissural fornix, general	#DIV/0!	#DIV/0!	#DIV/0!	#DIV/0!	#DIV/0!	#DIV/0!	#DIV/0!	#DIV/0!	#DIV/0!	#DIV/0!	#DIV/0!	#DIV/0!	#DIV/0!	#DIV/0!	#DIV/0!	#DIV/0!	#DIV/0!	#DIV/0!	#DIV/0!	#DIV/0!	#DIV/0!	#DIV/0!	#DIV/0!	#DIV/0!	#DIV/0!	#DIV/0!	#DIV/0!	#DIV/0!
1251	fiber tracts	mfbs	db	420	precommissural fornix diagonal band	#DIV/0!	#DIV/0!	#DIV/0!	#DIV/0!	#DIV/0!	#DIV/0!	#DIV/0!	#DIV/0!	#DIV/0!	#DIV/0!	#DIV/0!	#DIV/0!	#DIV/0!	#DIV/0!	#DIV/0!	#DIV/0!	#DIV/0!	#DIV/0!	#DIV/0!	#DIV/0!	#DIV/0!	#DIV/0!	#DIV/0!	#DIV/0!	#DIV/0!	#DIV/0!	#DIV/0!	#DIV/0!
1252	fiber tracts	mfbs	fxpo	737	postcommissural fornix	#DIV/0!	#DIV/0!	#DIV/0!	#DIV/0!	#DIV/0!	#DIV/0!	#DIV/0!	#DIV/0!	#DIV/0!	#DIV/0!	#DIV/0!	#DIV/0!	#DIV/0!	#DIV/0!	#DIV/0!	#DIV/0!	#DIV/0!	#DIV/0!	#DIV/0!	#DIV/0!	#DIV/0!	#DIV/0!	#DIV/0!	#DIV/0!	#DIV/0!	#DIV/0!	#DIV/0!	#DIV/0!
1253	fiber tracts	mfbs	mct	428	medial corticohypothalamic tract	#DIV/0!	#DIV/0!	#DIV/0!	#DIV/0!	#DIV/0!	#DIV/0!	#DIV/0!	#DIV/0!	#DIV/0!	#DIV/0!	#DIV/0!	#DIV/0!	#DIV/0!	#DIV/0!	#DIV/0!	#DIV/0!	#DIV/0!	#DIV/0!	#DIV/0!	#DIV/0!	#DIV/0!	#DIV/0!	#DIV/0!	#DIV/0!	#DIV/0!	#DIV/0!	#DIV/0!	#DIV/0!
1254	fiber tracts	mfbs	fx	436	columns of the fornix	0.0182793	0.0240081	0.0277709	0.0239027	0.0500278	0.0385238	0.102027	0.061855	0.107461	0.0889699	0.0797563	0.080713	0.000647322	0.000558956	0.00108419	0.000165225	0.0129849	0.0149853	0.0179132	0.0165849	0.0528326	0.00835028	0.0265379	0.0235774	0.0443834	0.0390153	0.0258721	0.0448299
1255	fiber tracts	mfbs	hc	618	hippocampal commissures	#DIV/0!	#DIV/0!	#DIV/0!	#DIV/0!	#DIV/0!	#DIV/0!	#DIV/0!	#DIV/0!	#DIV/0!	#DIV/0!	#DIV/0!	#DIV/0!	#DIV/0!	#DIV/0!	#DIV/0!	#DIV/0!	#DIV/0!	#DIV/0!	#DIV/0!	#DIV/0!	#DIV/0!	#DIV/0!	#DIV/0!	#DIV/0!	#DIV/0!	#DIV/0!	#DIV/0!	#DIV/0!
1256	fiber tracts	mfbs	dhc	443	dorsal hippocampal commissure	0.00562288	0.00645121	0.0101264	0.00600948	0.0154119	0.0137902	0.0232138	0.0128086	0.0198871	0.0520198	0.0275622	0.0457149	0.00100796	0.000902992	0.00108265	0.000269093	0.00618053	0.00210292	0.00282285	0.00400158	0.007237	0.00427248	0.00577181	0.00370663	0.0112887	0.00915129	0.0106473	0.00951217
1257	fiber tracts	mfbs	vhc	449	ventral hippocampal commissure	0.00407715	0.00843705	0.00800611	0.00769128	#DIV/0!	0.0204718	#DIV/0!	#DIV/0!	#DIV/0!	#DIV/0!	#DIV/0!	0.0473557	#DIV/0!	0.00104469	#DIV/0!	0.00377565	0.0021411	0.00465752	#DIV/0!	0.00374349	#DIV/0!	#DIV/0!	#DIV/0!	0.00892452	#DIV/0!	0.0374552	0.0286238	#DIV/0!
1258	fiber tracts	mfbs	per	713	perforant path	#DIV/0!	#DIV/0!	#DIV/0!	#DIV/0!	#DIV/0!	#DIV/0!	#DIV/0!	#DIV/0!	#DIV/0!	#DIV/0!	#DIV/0!	#DIV/0!	#DIV/0!	#DIV/0!	#DIV/0!	#DIV/0!	#DIV/0!	#DIV/0!	#DIV/0!	#DIV/0!	#DIV/0!	#DIV/0!	#DIV/0!	#DIV/0!	#DIV/0!	#DIV/0!	#DIV/0!	#DIV/0!
1259	fiber tracts	mfbs	ab	474	angular path	#DIV/0!	#DIV/0!	#DIV/0!	#DIV/0!	#DIV/0!	#DIV/0!	#DIV/0!	#DIV/0!	#DIV/0!	#DIV/0!	#DIV/0!	#DIV/0!	#DIV/0!	#DIV/0!	#DIV/0!	#DIV/0!	#DIV/0!	#DIV/0!	#DIV/0!	#DIV/0!	#DIV/0!	#DIV/0!	#DIV/0!	#DIV/0!	#DIV/0!	#DIV/0!	#DIV/0!	#DIV/0!
1260	fiber tracts	mfbs	lab	37	longitudinal association bundle	#DIV/0!	#DIV/0!	#DIV/0!	#DIV/0!	#DIV/0!	#DIV/0!	#DIV/0!	#DIV/0!	#DIV/0!	#DIV/0!	#DIV/0!	#DIV/0!	#DIV/0!	#DIV/0!	#DIV/0!	#DIV/0!	#DIV/0!	#DIV/0!	#DIV/0!	#DIV/0!	#DIV/0!	#DIV/0!	#DIV/0!	#DIV/0!	#DIV/0!	#DIV/0!	#DIV/0!	#DIV/0!
1261	fiber tracts	mfbs	st	301	stria terminalis	0.0401054	#DIV/0!	0.00918533	0.044866	0.0371134	#DIV/0!	0.0203747	0.0363203	#DIV/0!	#DIV/0!	0.0788485	0.0447174	#DIV/0!	#DIV/0!	0.000486435	#DIV/0!	#DIV/0!	0.00571851	0.0300738	#DIV/0!	0.0111092	0.0245641	#DIV/0!	0.0344246	0.0147533	0.00976853	#DIV/0!	#DIV/0!
1262	fiber tracts	mfbs	stc	484682528	commissural branch of stria terminalis	#DIV/0!	#DIV/0!	#DIV/0!	#DIV/0!	#DIV/0!	#DIV/0!	#DIV/0!	#DIV/0!	#DIV/0!	#DIV/0!	#DIV/0!	#DIV/0!	#DIV/0!	#DIV/0!	#DIV/0!	#DIV/0!	#DIV/0!	#DIV/0!	#DIV/0!	#DIV/0!	#DIV/0!	#DIV/0!	#DIV/0!	#DIV/0!	#DIV/0!	#DIV/0!	#DIV/0!	#DIV/0!
1263	fiber tracts	mfbs	mfsbshy	824	hypothalamus related	#DIV/0!	#DIV/0!	#DIV/0!	#DIV/0!	#DIV/0!	#DIV/0!	#DIV/0!	#DIV/0!	#DIV/0!	#DIV/0!	#DIV/0!	#DIV/0!	#DIV/0!	#DIV/0!	#DIV/0!	#DIV/0!	#DIV/0!	#DIV/0!	#DIV/0!	#DIV/0!	#DIV/0!	#DIV/0!	#DIV/0!	#DIV/0!	#DIV/0!	#DIV/0!	#DIV/0!	#DIV/0!
1264	fiber tracts	mfbs	mfb	54	medial forebrain bundle	0.0145832	0.0340526	0.0210605	0.0308383	0.0670496	0.075612	0.102212	0.0582602	0.105267	0.098152	0.10805	0.107707	0.000243445	0.000670447	0.00030318	#DIV/0!	0.0114889	0.0189586	0.0097308	0.00530195	0.0360417	0.0178083	0.0505857	0.026351	0.0117575	0.0397293	0.0411416	0.0271575
1265	fiber tracts	mfbs	vlt	405	ventrolateral hypothalamic tract	#DIV/0!	#DIV/0!	#DIV/0!	#DIV/0!	#DIV/0!	#DIV/0!	#DIV/0!	#DIV/0!	#DIV/0!	#DIV/0!	#DIV/0!	#DIV/0!	#DIV/0!	#DIV/0!	#DIV/0!	#DIV/0!	#DIV/0!	#DIV/0!	#DIV/0!	#DIV/0!	#DIV/0!	#DIV/0!	#DIV/0!	#DIV/0!	#DIV/0!	#DIV/0!	#DIV/0!	#DIV/0!
1266	fiber tracts	mfbs	poc	174	preoptic commissure	#DIV/0!	#DIV/0!	#DIV/0!	#DIV/0!	#DIV/0!	#DIV/0!	#DIV/0!	#DIV/0!	#DIV/0!	#DIV/0!	#DIV/0!	#DIV/0!	#DIV/0!	#DIV/0!	#DIV/0!	#DIV/0!	#DIV/0!	#DIV/0!	#DIV/0!	#DIV/0!	#DIV/0!	#DIV/0!	#DIV/0!	#DIV/0!	#DIV/0!	#DIV/0!	#DIV/0!	#DIV/0!
1267	fiber tracts	mfbs	sup	349	supraoptic commissures	0.00920807	0.0114991	0.0082372	0.0231763	0.0426274	0.0113227	0.0481643	#DIV/0!	0.0937034	0.0775645	0.0530333	0.0318836	#DIV/0!	#DIV/0!	#DIV/0!	#DIV/0!	#DIV/0!	0.0298937	0.0220386	0.0132675	0.0326277	0.0416298	0.0344542	0.0219879	0.0527763	0.0207274	#DIV/0!	0.0179448
1268	fiber tracts	mfbs	supa	817	supraoptic commissures, anterior	#DIV/0!	#DIV/0!	#DIV/0!	#DIV/0!	#DIV/0!	#DIV/0!	#DIV/0!	#DIV/0!	#DIV/0!	#DIV/0!	#DIV/0!	#DIV/0!	#DIV/0!	#DIV/0!	#DIV/0!	#DIV/0!	#DIV/0!	#DIV/0!	#DIV/0!	#DIV/0!	#DIV/0!	#DIV/0!	#DIV/0!	#DIV/0!	#DIV/0!	#DIV/0!	#DIV/0!	#DIV/0!
1269	fiber tracts	mfbs	supd	825	supraoptic commissures, dorsal	#DIV/0!	#DIV/0!	#DIV/0!	#DIV/0!	#DIV/0!	#DIV/0!	#DIV/0!	#DIV/0!	#DIV/0!	#DIV/0!	#DIV/0!	#DIV/0!	#DIV/0!	#DIV/0!	#DIV/0!	#DIV/0!	#DIV/0!	#DIV/0!	#DIV/0!	#DIV/0!	#DIV/0!	#DIV/0!	#DIV/0!	#DIV/0!	#DIV/0!	#DIV/0!	#DIV/0!	#DIV/0!
1270	fiber tracts	mfbs	supv	833	supraoptic commissures, ventral	#DIV/0!	#DIV/0!	#DIV/0!	#DIV/0!	#DIV/0!	#DIV/0!	#DIV/0!	#DIV/0!	#DIV/0!	#DIV/0!	#DIV/0!	#DIV/0!	#DIV/0!	#DIV/0!	#DIV/0!	#DIV/0!	#DIV/0!	#DIV/0!	#DIV/0!	#DIV/0!	#DIV/0!	#DIV/0!	#DIV/0!	#DIV/0!	#DIV/0!	#DIV/0!	#DIV/0!	#DIV/0!
1271	fiber tracts	mfbs	pmx	166	premammillary commissure	#DIV/0!	#DIV/0!	#DIV/0!	#DIV/0!	#DIV/0!	#DIV/0!	#DIV/0!	#DIV/0!	#DIV/0!	#DIV/0!	#DIV/0!	#DIV/0!	#DIV/0!	#DIV/0!	#DIV/0!	#DIV/0!	#DIV/0!	#DIV/0!	#DIV/0!	#DIV/0!	#DIV/0!	#DIV/0!	#DIV/0!	#DIV/0!	#DIV/0!	#DIV/0!	#DIV/0!	#DIV/0!
1272	fiber tracts	mfbs	smd	341	supramammillary decussation	#DIV/0!	#DIV/0!	#DIV/0!	#DIV/0!	#DIV/0!	#DIV/0!	#DIV/0!	#DIV/0!	#DIV/0!	#DIV/0!	#DIV/0!	#DIV/0!	#DIV/0!	#DIV/0!	#DIV/0!	#DIV/0!	#DIV/0!	#DIV/0!	#DIV/0!	#DIV/0!	#DIV/0!	#DIV/0!	#DIV/0!	#DIV/0!	#DIV/0!	#DIV/0!	#DIV/0!	#DIV/0!
1273	fiber tracts	mfbs	php	182	propriohypothalamic pathways	#DIV/0!	#DIV/0!	#DIV/0!	#DIV/0!	#DIV/0!	#DIV/0!	#DIV/0!	#DIV/0!	#DIV/0!	#DIV/0!	#DIV/0!	#DIV/0!	#DIV/0!	#DIV/0!	#DIV/0!	#DIV/0!	#DIV/0!	#DIV/0!	#DIV/0!	#DIV/0!	#DIV/0!	#DIV/0!	#DIV/0!	#DIV/0!	#DIV/0!	#DIV/0!	#DIV/0!	#DIV/0!
1274	fiber tracts	mfbs	phpd	762	propriohypothalamic pathways, dorsal	#DIV/0!	#DIV/0!	#DIV/0!	#DIV/0!	#DIV/0!	#DIV/0!	#DIV/0!	#DIV/0!	#DIV/0!	#DIV/0!	#DIV/0!	#DIV/0!	#DIV/0!	#DIV/0!	#DIV/0!	#DIV/0!	#DIV/0!	#DIV/0!	#DIV/0!	#DIV/0!	#DIV/0!	#DIV/0!	#DIV/0!	#DIV/0!	#DIV/0!	#DIV/0!	#DIV/0!	#DIV/0!
1275	fiber tracts	mfbs	phpl	770	propriohypothalamic pathways, lateral	#DIV/0!	#DIV/0!	#DIV/0!	#DIV/0!	#DIV/0!	#DIV/0!	#DIV/0!	#DIV/0!	#DIV/0!	#DIV/0!	#DIV/0!	#DIV/0!	#DIV/0!	#DIV/0!	#DIV/0!	#DIV/0!	#DIV/0!	#DIV/0!	#DIV/0!	#DIV/0!	#DIV/0!	#DIV/0!	#DIV/0!	#DIV/0!	#DIV/0!	#DIV/0!	#DIV/0!	#DIV/0!
1276	fiber tracts	mfbs	phpm	779	propriohypothalamic pathways, medial	#DIV/0!	#DIV/0!	#DIV/0!	#DIV/0!	#DIV/0!	#DIV/0!	#DIV/0!	#DIV/0!	#DIV/0!	#DIV/0!	#DIV/0!	#DIV/0!	#DIV/0!	#DIV/0!	#DIV/0!	#DIV/0!	#DIV/0!	#DIV/0!	#DIV/0!	#DIV/0!	#DIV/0!	#DIV/0!	#DIV/0!	#DIV/0!	#DIV/0!	#DIV/0!	#DIV/0!	#DIV/0!
1277	fiber tracts	mfbs	phpv	787	propriohypothalamic pathways, ventral	#DIV/0!	#DIV/0!	#DIV/0!	#DIV/0!	#DIV/0!	#DIV/0!	#DIV/0!	#DIV/0!	#DIV/0!	#DIV/0!	#DIV/0!	#DIV/0!	#DIV/0!	#DIV/0!	#DIV/0!	#DIV/0!	#DIV/0!	#DIV/0!	#DIV/0!	#DIV/0!	#DIV/0!	#DIV/0!	#DIV/0!	#DIV/0!	#DIV/0!	#DIV/0!	#DIV/0!	#DIV/0!
1278	fiber tracts	mfbs	pvbh	150	periventricular bundle of the hypothalamus	#DIV/0!	#DIV/0!	#DIV/0!	#DIV/0!	#DIV/0!	#DIV/0!	#DIV/0!	#DIV/0!	#DIV/0!	#DIV/0!	#DIV/0!	#DIV/0!	#DIV/0!	#DIV/0!	#DIV/0!	#DIV/0!	#DIV/0!	#DIV/0!	#DIV/0!	#DIV/0!	#DIV/0!	#DIV/0!	#DIV/0!	#DIV/0!	#DIV/0!	#DIV/0!	#DIV/0!	#DIV/0!
1279	fiber tracts	mfbs	mfbsma	46	mammillary related	#DIV/0!	#DIV/0!	#DIV/0!	#DIV/0!	#DIV/0!	#DIV/0!	#DIV/0!	#DIV/0!	#DIV/0!	#DIV/0!	#DIV/0!	#DIV/0!	#DIV/0!	#DIV/0!	#DIV/0!	#DIV/0!	#DIV/0!	#DIV/0!	#DIV/0!	#DIV/0!	#DIV/0!	#DIV/0!	#DIV/0!	#DIV/0!	#DIV/0!	#DIV/0!	#DIV/0!	#DIV/0!
1280	fiber tracts	mfbs	pm	753	principal mammillary tract	0.0223437	0.0398567	0.00537248	0.037928	#DIV/0!	0.0993053	#DIV/0!	#DIV/0!	#DIV/0!	#DIV/0!	0.0750841	0.0894688	0.00140463	0.000344603	#DIV/0!	0.00147087	0.008436	0.00294112	#DIV/0!	0.0294672	#DIV/0!	#DIV/0!	#DIV/0!	0.0380305	#DIV/0!	0.0615809	0.0213056	0.0559788
1281	fiber tracts	mfbs	mtt	690	mammillothalamic tract	0.0382352	0.0263096	0.00898307	0.0421146	0.0381979	0.0806309	0.101631	0.107127	0.119361	0.112102	0.100669	0.118885	0.000657085	0.000763384	0.00121898	0.000319937	0.0102295	0.0176452	0.0110426	0.0233401	#DIV/0!	0.00365824	0.0268497	0.031763	0.0375082	0.0490101	0.0295989	0.0482142
1282	fiber tracts	mfbs	mtg	681	mammillotegmental tract	0.0131115	0.0389708	#DIV/0!	0.0251212	#DIV/0!	0.113882	#DIV/0!	#DIV/0!	#DIV/0!	#DIV/0!	#DIV/0!	#DIV/0!	#DIV/0!	#DIV/0!	#DIV/0!	#DIV/0!	#DIV/0!	#DIV/0!	#DIV/0!	#DIV/0!	#DIV/0!	#DIV/0!	#DIV/0!	0.0380931	#DIV/0!	#DIV/0!	#DIV/0!	#DIV/0!
1283	fiber tracts	mfbs	mp	673	mammillary peduncle	0.00960141	0.016166	0.00987207	0.0254055	0.0483221	0.0426557	0.0578619	0.0254141	0.0730289	0.0863503	0.0841175	0.0400749	0.00121191	#DIV/0!	#DIV/0!	#DIV/0!	0.00375681	0.00931953	0.00608611	0.00718272	#DIV/0!	0.00944231	0.00984171	0.010007	0.0067676	0.0224496	0.00893619	0.0131304
1284	fiber tracts	mfbs	mfbst	1068	dorsal thalamus related	#DIV/0!	#DIV/0!	#DIV/0!	#DIV/0!	#DIV/0!	#DIV/0!	#DIV/0!	#DIV/0!	#DIV/0!	#DIV/0!	#DIV/0!	#DIV/0!	#DIV/0!	#DIV/0!	#DIV/0!	#DIV/0!	#DIV/0!	#DIV/0!	#DIV/0!	#DIV/0!	#DIV/0!	#DIV/0!	#DIV/0!	#DIV/0!	#DIV/0!	#DIV/0!	#DIV/0!	#DIV/0!
1285	fiber tracts	mfbs	pvbt	722	periventricular bundle of the thalamus	#DIV/0!	#DIV/0!	#DIV/0!	#DIV/0!	#DIV/0!	#DIV/0!	#DIV/0!	#DIV/0!	#DIV/0!	#DIV/0!	#DIV/0!	#DIV/0!	#DIV/0!	#DIV/0!	#DIV/0!	#DIV/0!	#DIV/0!	#DIV/0!	#DIV/0!	#DIV/0!	#DIV/0!	#DIV/0!	#DIV/0!	#DIV/0!	#DIV/0!	#DIV/0!	#DIV/0!	#DIV/0!
1286	fiber tracts	mfbs	mfbse	1083	epithalamus related	#DIV/0!	#DIV/0!	#DIV/0!	#DIV/0!	#DIV/0!	#DIV/0!	#DIV/0!	#DIV/0!	#DIV/0!	#DIV/0!	#DIV/0!	#DIV/0!	#DIV/0!	#DIV/0!	#DIV/0!	#DIV/0!	#DIV/0!	#DIV/0!	#DIV/0!	#DIV/0!	#DIV/0!	#DIV/0!	#DIV/0!	#DIV/0!	#DIV/0!	#DIV/0!	#DIV/0!	#DIV/0!
1287	fiber tracts	mfbs	sm	802	stria medullaris	0.0109547	0.0261927	0.0156865	0.0344276	0.0414854	0.0383799	0.107174	0.0534196	0.125466	0.112106	0.0870113	0.0954118	0.00122409	0.000823426	0.00144048	0.000699932	0.0105079	0.00667709	0.00653798	0.00707767	0.020426	0.00936735	0.00864817	0.0204227	0.0253498	0.0279541	0.0229438	0.0172324
1288	fiber tracts	mfbs	fr	595	fasciculus retroflexus	0.0182828	0.0531738	0.00752802	0.0157413	#DIV/0!	0.0546363	#DIV/0!	#DIV/0!	#DIV/0!	#DIV/0!	0.10803	0.0680466	0.00104091	0.00146752	#DIV/0!	0.000364794	0.007651	0.00475465	#DIV/0!	0.00269282	#DIV/0!	#DIV/0!	#DIV/0!	0.0111295	0.011336	0.0594529	0.025258	0.00831556
1289	fiber tracts	mfbs	hbc	611	habenular commissure	#DIV/0!	0.0779721	#DIV/0!	0.0187162	#DIV/0!	0.0427312	#DIV/0!	#DIV/0!	#DIV/0!	#DIV/0!	#DIV/0!	#DIV/0!	#DIV/0!	#DIV/0!	#DIV/0!	0.000333916	#DIV/0!	#DIV/0!	#DIV/0!	#DIV/0!	#DIV/0!	#DIV/0!	#DIV/0!	0.0037213	#DIV/0!	0.00128783	#DIV/0!	#DIV/0!
1290	fiber tracts	mfbs	PIS	730	pineal stalk	#DIV/0!	#DIV/0!	#DIV/0!	#DIV/0!	#DIV/0!	#DIV/0!	#DIV/0!	#DIV/0!	#DIV/0!	#DIV/0!	#DIV/0!	#DIV/0!	#DIV/0!	#DIV/0!	#DIV/0!	#DIV/0!	#DIV/0!	#DIV/0!	#DIV/0!	#DIV/0!	#DIV/0!	#DIV/0!	#DIV/0!	#DIV/0!	#DIV/0!	#DIV/0!	#DIV/0!	#DIV/0!
1291	fiber tracts	mfbs	mfbsm	70	midbrain related	#DIV/0!	#DIV/0!	#DIV/0!	#DIV/0!	#DIV/0!	#DIV/0!	#DIV/0!	#DIV/0!	#DIV/0!	#DIV/0!	#DIV/0!	#DIV/0!	#DIV/0!	#DIV/0!	#DIV/0!	#DIV/0!	#DIV/0!	#DIV/0!	#DIV/0!	#DIV/0!	#DIV/0!	#DIV/0!	#DIV/0!	#DIV/0!	#DIV/0!	#DIV/0!	#DIV/0!	#DIV/0!
1292	fiber tracts	mfbs	dlf	547	dorsal longitudinal fascicle	#DIV/0!	#DIV/0!	#DIV/0!	#DIV/0!	#DIV/0!	#DIV/0!	#DIV/0!	#DIV/0!	#DIV/0!	#DIV/0!	#DIV/0!	#DIV/0!	#DIV/0!	#DIV/0!	#DIV/0!	#DIV/0!	#DIV/0!	#DIV/0!	#DIV/0!	#DIV/0!	#DIV/0!	#DIV/0!	#DIV/0!	#DIV/0!	#DIV/0!	#DIV/0!	#DIV/0!	#DIV/0!
1293	fiber tracts	mfbs	dtt	563	dorsal tegmental tract	#DIV/0!	#DIV/0!	#DIV/0!	#DIV/0!	#DIV/0!	#DIV/0!	#DIV/0!	#DIV/0!	#DIV/0!	#DIV/0!	#DIV/0!	#DIV/0!	#DIV/0!	#DIV/0!	#DIV/0!	#DIV/0!	#DIV/0!	#DIV/0!	#DIV/0!	#DIV/0!	#DIV/0!	#DIV/0!	#DIV/0!	#DIV/0!	#DIV/0!	#DIV/0!	#DIV/0!	#DIV/0!
1294	VS	VS	VS	73	ventricular systems	#DIV/0!	#DIV/0!	#DIV/0!	#DIV/0!	#DIV/0!	#DIV/0!	#DIV/0!	#DIV/0!	#DIV/0!	#DIV/0!	#DIV/0!	#DIV/0!	#DIV/0!	#DIV/0!	#DIV/0!	#DIV/0!	#DIV/0!	#DIV/0!	#DIV/0!	#DIV/0!	#DIV/0!	#DIV/0!	#DIV/0!	#DIV/0!	#DIV/0!	#DIV/0!	#DIV/0!	#DIV/0!
1295	VS	VL	VL	81	lateral ventricle	0.0148586	0.00379323	0.000766041	0.000735605	0.00285876	0.00131724	0.00215865	0.00381483	0.0494217	0.00830856	0.00353808	0.00378248	7.63713e-06	0.00012489	0.000606657	0.000194037	0.000661491	0.00137385	0.000582792	0.000548922	0.000693182	0.00483479	0.00147191	0.000894286	0.0016452	0.0132926	0.000903067	0.000932346
1296	VS	VL	RC	89	rhinocele	#DIV/0!	#DIV/0!	#DIV/0!	#DIV/0!	#DIV/0!	#DIV/0!	#DIV/0!	#DIV/0!	#DIV/0!	#DIV/0!	#DIV/0!	#DIV/0!	#DIV/0!	#DIV/0!	#DIV/0!	#DIV/0!	#DIV/0!	#DIV/0!	#DIV/0!	#DIV/0!	#DIV/0!	#DIV/0!	#DIV/0!	#DIV/0!	#DIV/0!	#DIV/0!	#DIV/0!	#DIV/0!
1297	VS	VL	SEZ	98	subependymal zone	0.00466635	0.0153589	0.010369	0.0105522	0.0272381	0.0214536	0.0500137	0.0241172	0.0303296	0.0349253	0.0481643	0.0647039	0.000469776	0.00064189	0.00366708	0.000249348	0.00648128	0.0097831	0.00469208	0.00989842	0.00781981	0.00916146	0.0114947	0.00852007	0.0128417	0.0155288	0.0119441	0.00986345
1298	VS	VL	chpl	108	choroid plexus	0.00113108	0.00039842	0.00153913	0.000370595	0.00547154	0.00222247	0.00160615	0.0316164	0.0213651	0.0108963	0.000536264	0.00544185	0.000187392	#DIV/0!	6.04158e-05	0.000115735	0.000367873	0.00119277	0.000181257	0.00100164	0.00140551	0.00134538	0.00168354	0.00492232	0.00153105	0.00247751	0.00212833	0.00093725
1299	VS	VL	chfl	116	choroid fissure	#DIV/0!	#DIV/0!	#DIV/0!	#DIV/0!	#DIV/0!	#DIV/0!	#DIV/0!	#DIV/0!	#DIV/0!	#DIV/0!	#DIV/0!	#DIV/0!	#DIV/0!	#DIV/0!	#DIV/0!	#DIV/0!	#DIV/0!	#DIV/0!	#DIV/0!	#DIV/0!	#DIV/0!	#DIV/0!	#DIV/0!	#DIV/0!	#DIV/0!	#DIV/0!	#DIV/0!	#DIV/0!
1300	VS	IVF	IVF	124	interventricular foramen	#DIV/0!	#DIV/0!	#DIV/0!	#DIV/0!	#DIV/0!	#DIV/0!	#DIV/0!	#DIV/0!	#DIV/0!	#DIV/0!	#DIV/0!	#DIV/0!	#DIV/0!	#DIV/0!	#DIV/0!	#DIV/0!	#DIV/0!	#DIV/0!	#DIV/0!	#DIV/0!	#DIV/0!	#DIV/0!	#DIV/0!	#DIV/0!	#DIV/0!	#DIV/0!	#DIV/0!	#DIV/0!
1301	VS	V3	V3	129	third ventricle	0.00708202	0.00461708	0.00291436	0.00830616	0.00940311	0.00715591	0.0290274	0.0180843	0.0165615	0.0467177	0.00981236	0.0143146	#DIV/0!	0.000123183	0.000813937	0.00165565	0.00548475	0.00407232	0.00501252	0.00341396	#DIV/0!	0.0058373	0.00383311	0.00494559	0.00394366	0.0031971	0.00493071	0.00187522
1302	VS	AQ	AQ	140	cerebral aqueduct	0.00300194	0.00385518	0.00258167	0.0143346	#DIV/0!	0.0096101	#DIV/0!	#DIV/0!	#DIV/0!	#DIV/0!	0.0028116	0.0350901	#DIV/0!	#DIV/0!	#DIV/0!	0.000991375	0.00436101	0.00213798	#DIV/0!	0.011393	#DIV/0!	#DIV/0!	#DIV/0!	0.016827	#DIV/0!	0.0679816	0.00138729	0.0196975
1303	VS	V4	V4	145	fourth ventricle	0.00224394	0.00515092	0.00397959	0.00829766	0.0381928	0.0159765	0.0156863	0.0535165	0.0265566	0.0213702	0.0130932	0.0150983	0.00120852	0.000354842	0.000799977	0.000198919	0.00238144	0.00253494	0.00652863	0.0067056	0.00225168	0.00885895	0.00437374	0.00664081	0.00474025	0.010415	0.00691863	0.00300714
1304	VS	V4	V4r	153	lateral recess	#DIV/0!	#DIV/0!	0.0104266	0.00629546	0.00460988	#DIV/0!	0.0200246	0.0306296	#DIV/0!	#DIV/0!	0.00888604	0.0218621	#DIV/0!	#DIV/0!	0.000280749	#DIV/0!	#DIV/0!	0.00171631	#DIV/0!	#DIV/0!	0.00904949	0.00876257	#DIV/0!	0.00237336	0.00904421	#DIV/0!	#DIV/0!	#DIV/0!
1305	VS	c	c	164	central canal, spinal cord/medulla	#DIV/0!	#DIV/0!	#DIV/0!	#DIV/0!	#DIV/0!	#DIV/0!	#DIV/0!	#DIV/0!	#DIV/0!	#DIV/0!	#DIV/0!	#DIV/0!	#DIV/0!	#DIV/0!	#DIV/0!	#DIV/0!	#DIV/0!	#DIV/0!	#DIV/0!	#DIV/0!	#DIV/0!	#DIV/0!	#DIV/0!	#DIV/0!	#DIV/0!	#DIV/0!	#DIV/0!	#DIV/0!
1306	grv	grv	grv	1024	grooves	#DIV/0!	#DIV/0!	#DIV/0!	#DIV/0!	#DIV/0!	#DIV/0!	#DIV/0!	#DIV/0!	#DIV/0!	#DIV/0!	#DIV/0!	#DIV/0!	#DIV/0!	#DIV/0!	#DIV/0!	#DIV/0!	#DIV/0!	#DIV/0!	#DIV/0!	#DIV/0!	#DIV/0!	#DIV/0!	#DIV/0!	#DIV/0!	#DIV/0!	#DIV/0!	#DIV/0!	#DIV/0!
1307	grv	grv of CTX	grv of CTX	1032	grooves of the cerebral cortex	#DIV/0!	#DIV/0!	#DIV/0!	#DIV/0!	#DIV/0!	#DIV/0!	#DIV/0!	#DIV/0!	#DIV/0!	#DIV/0!	#DIV/0!	#DIV/0!	#DIV/0!	#DIV/0!	#DIV/0!	#DIV/0!	#DIV/0!	#DIV/0!	#DIV/0!	#DIV/0!	#DIV/0!	#DIV/0!	#DIV/0!	#DIV/0!	#DIV/0!	#DIV/0!	#DIV/0!	#DIV/0!
1308	grv	grv of CTX	eg	1055	endorhinal groove	#DIV/0!	#DIV/0!	#DIV/0!	#DIV/0!	#DIV/0!	#DIV/0!	#DIV/0!	#DIV/0!	#DIV/0!	#DIV/0!	#DIV/0!	#DIV/0!	#DIV/0!	#DIV/0!	#DIV/0!	#DIV/0!	#DIV/0!	#DIV/0!	#DIV/0!	#DIV/0!	#DIV/0!	#DIV/0!	#DIV/0!	#DIV/0!	#DIV/0!	#DIV/0!	#DIV/0!	#DIV/0!
1309	grv	grv of CTX	hf	1063	hippocampal fissure	#DIV/0!	#DIV/0!	#DIV/0!	#DIV/0!	#DIV/0!	#DIV/0!	#DIV/0!	#DIV/0!	#DIV/0!	#DIV/0!	#DIV/0!	#DIV/0!	#DIV/0!	#DIV/0!	#DIV/0!	#DIV/0!	#DIV/0!	#DIV/0!	#DIV/0!	#DIV/0!	#DIV/0!	#DIV/0!	#DIV/0!	#DIV/0!	#DIV/0!	#DIV/0!	#DIV/0!	#DIV/0!
1310	grv	grv of CTX	rf	1071	rhinal fissure	#DIV/0!	#DIV/0!	#DIV/0!	#DIV/0!	#DIV/0!	#DIV/0!	#DIV/0!	#DIV/0!	#DIV/0!	#DIV/0!	#DIV/0!	#DIV/0!	#DIV/0!	#DIV/0!	#DIV/0!	#DIV/0!	#DIV/0!	#DIV/0!	#DIV/0!	#DIV/0!	#DIV/0!	#DIV/0!	#DIV/0!	#DIV/0!	#DIV/0!	#DIV/0!	#DIV/0!	#DIV/0!
1311	grv	grv of CTX	ri	1078	rhinal incisure	#DIV/0!	#DIV/0!	#DIV/0!	#DIV/0!	#DIV/0!	#DIV/0!	#DIV/0!	#DIV/0!	#DIV/0!	#DIV/0!	#DIV/0!	#DIV/0!	#DIV/0!	#DIV/0!	#DIV/0!	#DIV/0!	#DIV/0!	#DIV/0!	#DIV/0!	#DIV/0!	#DIV/0!	#DIV/0!	#DIV/0!	#DIV/0!	#DIV/0!	#DIV/0!	#DIV/0!	#DIV/0!
1312	grv	grv of CBX	grv of CBX	1040	grooves of the cerebellar cortex	#DIV/0!	#DIV/0!	#DIV/0!	#DIV/0!	#DIV/0!	#DIV/0!	#DIV/0!	#DIV/0!	#DIV/0!	#DIV/0!	#DIV/0!	#DIV/0!	#DIV/0!	#DIV/0!	#DIV/0!	#DIV/0!	#DIV/0!	#DIV/0!	#DIV/0!	#DIV/0!	#DIV/0!	#DIV/0!	#DIV/0!	#DIV/0!	#DIV/0!	#DIV/0!	#DIV/0!	#DIV/0!
1313	grv	grv of CBX	pce	1087	precentral fissure	#DIV/0!	#DIV/0!	#DIV/0!	#DIV/0!	#DIV/0!	#DIV/0!	#DIV/0!	#DIV/0!	#DIV/0!	#DIV/0!	#DIV/0!	#DIV/0!	#DIV/0!	#DIV/0!	#DIV/0!	#DIV/0!	#DIV/0!	#DIV/0!	#DIV/0!	#DIV/0!	#DIV/0!	#DIV/0!	#DIV/0!	#DIV/0!	#DIV/0!	#DIV/0!	#DIV/0!	#DIV/0!
1314	grv	grv of CBX	pcf	1095	preculminate fissure	#DIV/0!	#DIV/0!	#DIV/0!	#DIV/0!	#DIV/0!	#DIV/0!	#DIV/0!	#DIV/0!	#DIV/0!	#DIV/0!	#DIV/0!	#DIV/0!	#DIV/0!	#DIV/0!	#DIV/0!	#DIV/0!	#DIV/0!	#DIV/0!	#DIV/0!	#DIV/0!	#DIV/0!	#DIV/0!	#DIV/0!	#DIV/0!	#DIV/0!	#DIV/0!	#DIV/0!	#DIV/0!
1315	grv	grv of CBX	pri	1103	primary fissure	#DIV/0!	#DIV/0!	#DIV/0!	#DIV/0!	#DIV/0!	#DIV/0!	#DIV/0!	#DIV/0!	#DIV/0!	#DIV/0!	#DIV/0!	#DIV/0!	#DIV/0!	#DIV/0!	#DIV/0!	#DIV/0!	#DIV/0!	#DIV/0!	#DIV/0!	#DIV/0!	#DIV/0!	#DIV/0!	#DIV/0!	#DIV/0!	#DIV/0!	#DIV/0!	#DIV/0!	#DIV/0!
1316	grv	grv of CBX	psf	1112	posterior superior fissure	#DIV/0!	#DIV/0!	#DIV/0!	#DIV/0!	#DIV/0!	#DIV/0!	#DIV/0!	#DIV/0!	#DIV/0!	#DIV/0!	#DIV/0!	#DIV/0!	#DIV/0!	#DIV/0!	#DIV/0!	#DIV/0!	#DIV/0!	#DIV/0!	#DIV/0!	#DIV/0!	#DIV/0!	#DIV/0!	#DIV/0!	#DIV/0!	#DIV/0!	#DIV/0!	#DIV/0!	#DIV/0!
1317	grv	grv of CBX	ppf	1119	prepyramidal fissure	#DIV/0!	#DIV/0!	#DIV/0!	#DIV/0!	#DIV/0!	#DIV/0!	#DIV/0!	#DIV/0!	#DIV/0!	#DIV/0!	#DIV/0!	#DIV/0!	#DIV/0!	#DIV/0!	#DIV/0!	#DIV/0!	#DIV/0!	#DIV/0!	#DIV/0!	#DIV/0!	#DIV/0!	#DIV/0!	#DIV/0!	#DIV/0!	#DIV/0!	#DIV/0!	#DIV/0!	#DIV/0!
1318	grv	grv of CBX	sec	3	secondary fissure	#DIV/0!	#DIV/0!	#DIV/0!	#DIV/0!	#DIV/0!	#DIV/0!	#DIV/0!	#DIV/0!	#DIV/0!	#DIV/0!	#DIV/0!	#DIV/0!	#DIV/0!	#DIV/0!	#DIV/0!	#DIV/0!	#DIV/0!	#DIV/0!	#DIV/0!	#DIV/0!	#DIV/0!	#DIV/0!	#DIV/0!	#DIV/0!	#DIV/0!	#DIV/0!	#DIV/0!	#DIV/0!
1319	grv	grv of CBX	plf	11	posterolateral fissure	#DIV/0!	#DIV/0!	#DIV/0!	#DIV/0!	#DIV/0!	#DIV/0!	#DIV/0!	#DIV/0!	#DIV/0!	#DIV/0!	#DIV/0!	#DIV/0!	#DIV/0!	#DIV/0!	#DIV/0!	#DIV/0!	#DIV/0!	#DIV/0!	#DIV/0!	#DIV/0!	#DIV/0!	#DIV/0!	#DIV/0!	#DIV/0!	#DIV/0!	#DIV/0!	#DIV/0!	#DIV/0!
1320	grv	grv of CBX	nf	18	nodular fissure	#DIV/0!	#DIV/0!	#DIV/0!	#DIV/0!	#DIV/0!	#DIV/0!	#DIV/0!	#DIV/0!	#DIV/0!	#DIV/0!	#DIV/0!	#DIV/0!	#DIV/0!	#DIV/0!	#DIV/0!	#DIV/0!	#DIV/0!	#DIV/0!	#DIV/0!	#DIV/0!	#DIV/0!	#DIV/0!	#DIV/0!	#DIV/0!	#DIV/0!	#DIV/0!	#DIV/0!	#DIV/0!
1321	grv	grv of CBX	sif	25	simple fissure	#DIV/0!	#DIV/0!	#DIV/0!	#DIV/0!	#DIV/0!	#DIV/0!	#DIV/0!	#DIV/0!	#DIV/0!	#DIV/0!	#DIV/0!	#DIV/0!	#DIV/0!	#DIV/0!	#DIV/0!	#DIV/0!	#DIV/0!	#DIV/0!	#DIV/0!	#DIV/0!	#DIV/0!	#DIV/0!	#DIV/0!	#DIV/0!	#DIV/0!	#DIV/0!	#DIV/0!	#DIV/0!
[truncated: 7 more rows]

## Sheet: Fig 1G
Data Description: Fig. 1G. Cortical area (um^2) measurements obtained by QUINT histology pipeline.
[truncated: 30 more rows]

[truncated: 35 more sheets: Fig S1B, Fig S1C, Fig S1D, Fig 1I + S1E + S1G, Fig 1J, Fig 2A, Fig 2F, Fig S2C, Fig S2D, Fig S3, Fig S4, Fig S5, Fig. 3F, Fig. 3G, Fig. 3H, Fig. 3I-L, Fig. 3M + 3N, Fig. 3O + 3P, Fig. S7B-D, Fig. S7E + S7G …]
